# Supplementary material for: Corollary discharge promotes a sustained motor state in a neural circuit for navigation
Source: eLife. 2021 Apr 21;10:e68848. doi: 10.7554/eLife.68848 (PMC8139836; doi:10.7554/eLife.68848)
Supplement: Figure 1—source data 1. [file elife-68848-fig1-data1.xlsx]

## Sheet: Fig 1A-x coordinate
Note: Each colume corresponds to the x coordinates of a single trajectory
0	0	0	0	0	0	0	0	0	0	0	0	0	0	0	0	0	0	0	0	0	0	0	0	0	0	0	0	0	0	0	0	0	0	0	0	0	0	0	0	0	0	0	0	0	0	0	0	0
-0.590698	-0.0118408	0.214355	0.0478516	0.324951	0.297363	-0.265137	-0.152222	-0.161499	1.04382	-0.8302	0.0319824	0.00012207	0.131592	0.236084	-0.0394287	0.309692	0.259766	-0.299072	0.646362	1.02881	0.0994873	-0.609497	-1.20935	-0.302002	0.993164	-0.274902	0.54248	-0.157837	1.74683	-0.601318	0.0352783	0.227417	-0.674561	0.0661621	-0.145142	0.869141	0.538696	-0.0744629	0.218872	-0.405762	-0.2854	0.383179	-0.454956	0.733521	1.27808	0.337402	-0.0758057	0.674194
-0.946045	0.0252686	-0.287109	-0.00305176	0.161011	0.35144	-0.10437	-0.320435	-0.226685	1.99121	-1.35095	-0.03125	-0.0858154	0.18811	0.625	-0.0126953	0.690186	0.411011	-0.253418	1.10974	4.07617	0.394531	-1.20007	-3.55945	-0.692871	2.01294	-0.673828	1.09668	-0.204102	3.36743	-0.936157	-0.24292	0.627197	-1.23547	0.0821533	-1.1416	2.10181	0.540771	-0.0668945	-0.536255	-0.756226	-0.532837	0.898926	-1.15637	1.96887	1.91211	1.047	-0.417725	0.939819
-0.868896	0.186279	-1.47388	-0.0571289	0.438721	0.300293	0.196411	-0.720093	-0.37146	3.50427	-1.83105	-0.00524902	-0.00708008	0.05896	0.724731	-0.0948486	0.954102	0.414185	0.26355	1.13879	4.77405	1.04578	-1.97058	-4.54321	-1.14905	2.77856	-0.906982	1.35413	-0.176392	4.15613	-2.21704	-0.762329	1.11841	-1.79224	0.226562	-2.10388	3.42017	-0.290283	-0.219482	-0.328369	-2.20581	-0.628418	1.15869	-1.75024	2.89307	3.41211	1.53992	-1.29956	1.60876
-0.739624	-0.0690918	-2.39062	-0.083374	0.698486	0.190063	1.3092	-1.02588	-0.689209	4.35974	-2.25708	0.241455	-0.139282	0.0997314	0.215332	-0.126099	1.24011	0.0446777	0.853271	1.71692	6.51465	1.46765	-2.71216	-4.38135	-1.59497	3.7262	-1.61487	1.76147	-0.176025	5.75195	-3.47339	-1.04028	0.970337	-2.28882	0.510498	-3.29358	4.31262	-0.368896	-1.19287	-0.459839	-0.988403	-0.754395	1.44897	-2.75012	4.31189	4.2146	2.39111	-1.57764	2.13843
-0.571167	-1.17407	-3.30151	-0.203003	0.612549	0.0057373	2.61462	-0.941162	-1.04663	4.83813	-2.50708	0.744019	-0.0845947	0.130615	0.129517	-0.161987	1.96936	-0.201294	1.32214	2.14294	7.37646	1.66467	-3.33179	-4.80188	-2.28003	4.1825	-1.86963	2.07361	-0.369263	6.57349	-3.93066	-1.28162	0.821777	-2.65918	0.950195	-4.20349	6.34875	-0.504272	-1.00586	-1.58789	-2.68689	-1.13989	1.72314	-3.95471	5.39124	5.26685	3.80505	-3.06689	2.578
-0.326904	-1.54932	-4.67419	0.0184326	0.389038	-0.254395	4.17859	-0.409058	-1.28149	5.39197	-3.16821	1.02905	0.129272	0.146851	0.147217	-0.658203	2.4812	-0.311279	1.55029	3.58179	8.96472	1.8468	-4.31323	-6.14929	-3.13074	5.54358	-2.1731	2.92065	-0.315063	7.40051	-4.39221	-1.9978	0.731567	-3.11755	1.56641	-5.65186	6.59155	-0.485596	-1.32275	-2.13611	-3.21228	-1.30908	2.51758	-4.4873	7.34045	5.73242	4.69409	-4.44373	2.97668
-0.112183	-2.17969	-4.87866	0.433716	0.129639	-0.320435	4.67261	0.271729	-1.69116	6.60669	-3.70398	1.19873	0.286865	0.196411	0.0966797	-1.1095	3.09106	-0.508911	1.99695	5.20862	10.5366	1.91992	-6.10107	-7.69861	-3.54297	6.26624	-2.28723	3.69836	-0.337158	7.5647	-4.57031	-2.4397	0.473999	-2.07642	1.66077	-7.29797	5.23083	-0.403442	-1.37195	-2.59436	-3.198	-1.54944	3.23743	-5.63696	8.48914	7.26843	5.05261	-6.03564	4.05322
0.219849	-2.83142	-5.38916	1.17993	0.0212402	-0.663452	6.07617	1.30334	-2.09534	7.73499	-4.20239	1.83618	0.298462	0.192627	0.0286865	-1.74585	3.13879	-0.884888	2.56921	5.83276	11.9604	1.95129	-7.48425	-8.78687	-4.69861	7.17261	-2.50024	4.79883	-0.375122	7.86047	-4.9823	-2.68396	0.222046	-1.35559	2.57495	-8.38049	5.12598	-0.4729	-1.53357	-3.77124	-3.07141	-1.70679	3.66125	-7.10022	9.05225	9.15845	5.54919	-5.38855	4.92029
0.732178	-4.16968	-6.25806	1.8053	-0.170288	-0.984741	6.98889	1.98328	-2.66797	8.56934	-4.47778	2.15479	0.0767822	0.180664	-0.454346	-2.08752	3.65234	-1.10547	3.29871	6.27295	13.1057	1.84167	-8.83496	-9.58618	-5.43372	7.52258	-2.7782	5.04199	-0.324951	8.05786	-5.60413	-3.03809	0.100464	-0.206787	3.47058	-8.90271	5.57129	-0.633423	-2.14282	-3.63721	-2.64233	-1.97961	3.5658	-8.43274	9.36877	9.96094	6.40173	-6.67859	3.69592
1.1842	-5.72888	-6.91528	2.36621	-0.484741	-1.45496	7.76465	2.44299	-2.73511	9.32678	-5.62939	2.59558	-0.281982	-0.013916	-1.17322	-2.38184	4.09045	-1.14062	3.96143	6.90625	13.6739	1.85229	-9.51648	-9.55334	-6.08105	8.13391	-3.03113	5.59241	-0.00256348	8.01257	-6.27515	-3.17944	-0.124146	0.455566	4.61572	-10.4974	5.4801	-0.765747	-2.2533	-3.52002	-2.3208	-2.04932	4.30725	-9.42175	8.34583	10.2576	7.19702	-7.52893	2.8501
2.70227	-6.6897	-8.08923	3.02136	-1.11816	-1.71484	8.23084	2.18579	-3.12927	9.9209	-6.52368	2.96191	-0.172363	-0.201294	-1.41772	-2.40149	4.31812	-1.10754	4.07117	7.42029	14.9073	1.03162	-11.0399	-10.2531	-7.20825	8.63989	-3.34265	5.99915	-0.086792	7.7771	-7.05847	-3.55518	-0.351929	1.15503	5.52722	-11.9539	6.12268	-1.00415	-2.18225	-3.1283	-2.27173	-1.82495	4.65698	-9.6272	7.44482	11.233	7.51331	-8.70337	2.36206
3.79956	-7.20483	-8.36975	3.06531	-2.6687	-2.18152	8.9104	2.03235	-2.83826	10.8336	-7.82495	3.37598	0.200439	-0.763428	-1.51831	-2.09082	4.2854	-1.27563	4.10364	8.1073	15.8933	0.441528	-11.6726	-11.1664	-7.94409	9.29248	-3.521	6.23401	-0.137939	7.50659	-7.72668	-3.83545	-0.509033	2.02917	6.31787	-12.1804	7.92664	-1.35632	-2.19995	-3.1438	-1.78638	-1.80945	4.78235	-9.39075	6.38733	12.1691	8.43604	-10.3717	1.6886
4.44116	-8.33069	-8.8905	3.39856	-3.41895	-2.60413	9.7406	1.5575	-2.77307	11.7512	-8.90625	4.10791	0.213501	-1.65137	-1.87756	-1.495	4.13538	-1.32422	4.07886	8.99927	16.7719	-0.330566	-12.399	-12.8896	-9.36206	10.1101	-3.79431	6.32129	-0.460205	7.32678	-7.82507	-4.09802	-0.544922	3.21423	6.89404	-12.8081	9.13354	-1.50842	-1.70752	-3.26489	-0.108154	-1.58252	4.87512	-9.24304	5.05225	12.4985	9.43921	-11.683	1.10803
5.5636	-9.68335	-9.43469	4.05737	-4.06445	-3.10535	10.1459	1.16809	-2.90564	12.6682	-9.35461	4.42944	0.344482	-2.01685	-2.05371	-0.783569	3.85925	-1.81714	4.02576	10.2048	17.6083	-1.53125	-13.1343	-14.2306	-10.3959	10.5455	-4.22754	6.98853	-0.877441	7.37671	-8.13403	-4.55237	-0.577881	3.87903	7.22058	-13.0858	10.1364	-1.64258	-1.83398	-4.16602	1.08362	-1.27673	4.99097	-9.30579	4.13733	13.3242	10.0994	-11.6277	0.438354
6.15527	-10.3673	-10.0376	4.75085	-4.60986	-3.69653	10.8112	0.78772	-2.91846	13.1948	-9.64783	4.47498	0.295288	-2.43945	-2.3114	0.160522	3.43652	-2.35327	4.76099	10.6862	18.4453	-2.5022	-13.3853	-14.5573	-10.8	11.3834	-4.3551	7.26221	-0.799438	7.63159	-8.82117	-4.8125	-0.494507	4.67041	7.56592	-13.4658	12.8478	-1.91296	-2.10254	-4.91541	1.42615	-1.14172	5.26575	-9.28955	3.65015	13.7068	10.4258	-11.3959	-0.536499
6.6731	-10.62	-11.1042	5.48047	-5.71472	-4.39075	11.3857	0.0748291	-2.18152	13.793	-9.93787	4.63562	0.434448	-2.87903	-2.32373	0.657715	2.97083	-2.35901	4.95837	11.2565	19.0618	-3.56226	-13.7108	-14.8617	-11.3561	12.2291	-4.65271	7.83752	-0.131592	7.18188	-9.36096	-5.48059	-0.455811	4.60547	7.71057	-13.717	13.7268	-2.22546	-2.02979	-4.88855	2.2522	-1.10559	5.37646	-9.22498	2.95312	13.8867	11.1832	-11.4774	-1.30786
7.0033	-10.9661	-12.2102	5.50903	-6.56384	-5.02173	12.1942	-0.470825	-1.19592	14.8342	-10.3054	4.58301	0.41687	-3.32141	-2.48315	1.18799	2.30017	-2.61621	5.05603	12.1599	19.5188	-4.16467	-13.947	-15.0569	-12.0009	13.3234	-4.76697	8.98547	-0.103882	7.1073	-9.7876	-6.22754	-0.420654	4.36938	7.99353	-13.7959	14.8632	-2.18262	-2.10083	-5.92383	2.69812	-1.16687	5.50208	-9.39441	2.25293	14.296	11.9334	-11.6515	-1.06946
7.67676	-11.2844	-13.2007	5.53076	-7.39014	-6.13086	12.8737	-0.820923	0.329468	16.0305	-10.8641	4.81482	0.578491	-3.552	-2.55676	1.82544	1.99146	-2.89893	5.03821	13.4379	20.2324	-4.82739	-14.093	-16.1063	-12.8113	14.7065	-4.96228	9.66235	-0.52063	7.99524	-10.1372	-7.01855	-0.0557861	4.26709	8.00598	-13.8342	16.8179	-2.03516	-2.28589	-7.39465	3.20447	-1.04651	5.45422	-9.79919	1.41467	14.2615	12.2278	-11.8652	-0.738281
9.23901	-11.8746	-13.8962	5.46802	-7.93884	-6.53589	13.1588	-1.16333	1.89624	17.2142	-11.6234	5.11072	0.631958	-3.84949	-2.63171	2.36951	2.02832	-2.84583	5.03247	14.5953	20.3219	-5.19702	-14.8264	-16.6484	-13.786	16.1256	-5.09851	10.4442	-0.958374	8.05627	-11.2792	-7.73438	0.4646	4.19409	7.85022	-13.6544	17.9388	-1.77551	-2.3772	-8.61816	4.12476	-0.942627	5.61157	-10.0365	0.384644	13.9569	12.5813	-12.6497	-0.350708
10.6909	-12.0922	-14.3864	5.45935	-8.33313	-7.21704	14.0925	-1.28845	3.26147	18.3282	-12.4312	5.30188	0.574585	-4.27527	-2.65979	3.22949	2.43176	-4.19958	5.02246	14.8932	20.345	-5.56128	-15.6544	-17.7592	-15.6433	17.6489	-5.23792	10.9071	-1.18811	8.38501	-11.9443	-8.34875	0.809082	3.98071	7.74988	-13.491	19.2039	-1.02258	-2.36389	-8.85352	5.41687	-0.897095	5.47534	-10.0676	-0.442749	12.952	13.0066	-14.6147	-0.656494
11.8436	-12.1826	-15.2611	5.56873	-8.8374	-7.34155	14.7026	-1.521	4.04407	19.4569	-12.9476	5.53406	0.818115	-4.66187	-2.43152	3.70312	2.64624	-5.70972	4.98706	15.3916	20.5469	-5.63721	-16.3722	-17.4434	-16.4642	19.1005	-5.12781	11.1793	-0.487671	9.53503	-12.8159	-9.5282	1.55261	4.33472	7.70227	-13.3041	18.3107	-0.079834	-2.37549	-8.89441	6.42627	-0.77771	5.35864	-10.1479	-1.08911	12.114	13.4855	-16.1887	-0.567383
12.7845	-12.5206	-16.5646	5.89526	-10.5625	-7.31555	14.5327	-1.61768	4.48401	20.6825	-13.2029	5.90613	0.914062	-4.98181	-2.33521	5.01331	2.77966	-6.16626	4.87317	15.7871	20.9613	-5.55176	-17.0497	-17.8218	-16.9025	20.0182	-5.07214	11.1947	-0.0432129	10.7802	-12.9349	-10.5472	1.78625	4.58337	7.79822	-13.1677	16.1545	0.631714	-2.5448	-9.18262	7.37732	-0.371582	5.33533	-10.327	-2.13806	11.0725	14.2478	-15.933	-1.99341
14.301	-12.5306	-17.5873	6.75366	-11.4746	-7.50146	14.7246	-1.39172	3.85461	21.6714	-13.1879	6.17432	1.07312	-5.43433	-2.21814	6.34546	3.04468	-7.41394	4.8905	16.7769	21.4352	-4.20703	-17.9323	-17.908	-16.9569	20.8265	-5.01575	11.0502	1.19641	11.2949	-11.6031	-11.1426	1.67407	4.5957	7.6792	-13.3234	14.4338	1.65027	-2.55444	-9.79797	8.17261	0.409058	5.3999	-10.5812	-2.43628	10.5499	14.8917	-15.9705	-3.00061
14.8137	-12.4124	-17.8234	7.36072	-11.9309	-7.71814	14.7804	-1.33411	3.19116	22.714	-13.1448	6.55432	1.40698	-6.19226	-2.23425	8.38599	3.2345	-8.20801	4.7616	17.7156	22.1191	-3.11951	-18.4814	-17.7795	-17.2715	21.6212	-4.8623	11.1776	1.71899	11.0438	-10.6227	-11.6473	1.47424	5.54883	7.3396	-13.2966	13.1182	3.23669	-2.57458	-10.2876	8.03857	0.481201	5.36047	-10.9674	-2.87476	9.54724	15.6228	-15.9768	-2.8916
16.5435	-12.2109	-18.9493	8.05859	-12.4573	-7.74133	14.9459	-1.23474	2.24402	23.6519	-13.0593	6.82751	1.46472	-6.60229	-2.46118	9.39771	3.58826	-8.82166	5.06543	18.6984	22.9709	-1.31079	-19.0198	-17.9525	-17.8735	23.1926	-5.04321	11.2012	1.5968	11.2263	-9.50476	-11.9714	1.30005	5.72021	6.72913	-13.5354	11.6	4.53992	-2.71985	-10.7087	9.07007	2.12134	5.43848	-11.1855	-3.31104	8.60486	16.3713	-16.2501	-3.36023
17.666	-11.7494	-19.2526	8.47864	-13.3326	-7.47351	14.923	-1.18018	2.31384	24.9469	-12.9012	6.95569	1.6897	-6.99976	-2.39685	9.98376	4.01929	-8.90515	4.82434	19.1278	23.6707	-0.197632	-20.1835	-17.9227	-18.2057	23.9208	-5.20496	11.0396	1.5105	11.8842	-9.17407	-11.8226	1.26501	6.33093	5.65015	-13.8481	10.2493	5.09644	-2.85425	-11.5825	9.76831	4.09778	5.44946	-11.4185	-4.29773	7.25818	16.9082	-16.9695	-5.08484
18.5243	-11.2184	-20.6609	8.82886	-15.2224	-7.2511	14.8821	-1.11292	2.4104	25.6274	-12.7534	7.16418	2.46472	-7.94592	-2.16565	11.0798	4.33801	-8.05103	4.12512	19.1954	24.927	0.594238	-19.5704	-17.5485	-18.7526	24.465	-5.06299	10.8571	1.00806	12.5149	-8.68982	-11.6992	1.34607	6.35657	4.8446	-14.5449	11.2384	5.35388	-2.88342	-12.1321	9.84497	5.92029	5.42822	-12.0708	-5.28711	6.07434	17.2764	-17.139	-5.93591
19.3619	-10.6423	-21.4686	9.93591	-16.5481	-6.91125	14.9967	-0.980225	2.25854	26.1759	-12.3198	7.77771	3.42444	-8.54004	-1.9491	12.0267	4.67749	-8.37268	3.56189	19.4879	25.562	1.42285	-18.7617	-17.1772	-19.2354	24.8027	-5.18958	10.2441	0.881958	12.9399	-8.26648	-11.3473	1.44812	6.77942	4.25671	-14.6421	11.9485	5.91321	-2.89856	-11.8171	10.0265	5.77734	5.32996	-12.2091	-5.99634	5.88245	17.5748	-17.4271	-7.29028
19.6812	-9.91882	-22.4515	11.0975	-17.9327	-6.38831	15.4926	-0.853271	1.97021	26.6049	-12.2026	8.2373	4.29236	-9.41931	-1.88037	13.47	4.93457	-8.99316	3.57227	20.2997	26.2777	2.30798	-17.739	-16.3188	-19.3353	25.5497	-5.06934	10.0664	0.97583	12.0492	-7.33398	-10.9913	1.6416	7.50159	3.54395	-14.8727	10.8545	7.96057	-2.85242	-12.1256	10.4438	6.35864	5.3092	-12.3645	-6.6239	6.50244	17.975	-18.1769	-7.3313
20.2158	-9.12695	-23.2747	11.9767	-18.7913	-5.77856	15.7589	0.0338135	1.82166	26.8929	-12.0015	8.48767	5.16296	-10.0139	-1.51367	14.4858	4.98035	-8.35364	3.23523	20.6531	27.0466	3.26123	-16.8885	-14.6174	-18.8418	26.5424	-4.70813	9.75281	1.05249	11.4456	-6.64185	-10.8391	1.59753	7.89111	2.52942	-15.5193	10.6512	8.97437	-2.87927	-11.9614	10.741	8.32593	5.36096	-12.4749	-7.6001	6.73425	18.3627	-18.9447	-7.45044
20.8624	-8.70081	-23.3254	12.5267	-19.8152	-5.45691	15.9791	1.64355	1.48682	27.2604	-11.7621	8.33081	6.95227	-10.1702	-1.33899	15.4453	5.35278	-6.63171	2.98218	20.605	27.6259	3.80066	-16.2505	-14.1737	-18.4301	27.8973	-4.48877	9.11707	1.09583	11.2445	-6.20837	-10.8086	1.55615	8.03979	1.13293	-16.1017	9.43848	9.47778	-2.44043	-11.6672	10.9447	9.62488	5.24243	-12.6512	-8.56543	6.77197	18.5356	-19.924	-8.09082
21.8264	-8.08374	-23.4368	12.7474	-20.8777	-4.79919	16.2882	2.73169	0.986938	27.1708	-11.4022	8.25208	7.92163	-10.272	-1.27856	16.5807	5.52087	-4.97314	2.86047	20.4993	28.047	3.48291	-15.9897	-13.9724	-18.3235	28.8234	-4.68005	8.54346	1.21753	11.3372	-6.23779	-10.7023	1.56323	8.19128	0.914551	-16.5549	8.1073	10.0737	-2.37939	-11.6877	11.4518	10.774	5.16541	-13.037	-9.28748	6.70154	19.0796	-20.0524	-9.23267
22.964	-7.09058	-23.9465	13.0466	-21.3519	-4.22656	16.829	4.02136	0.0605469	27.0454	-11.5609	8.28101	8.58264	-10.1825	-1.00269	17.2291	5.55444	-4.229	2.52905	20.251	28.0212	3.5083	-15.9016	-12.9908	-17.2649	29.3767	-4.66248	7.86353	1.31104	11.1209	-6.25293	-10.4093	1.68311	8.11487	1.28625	-16.9745	5.58643	10.4932	-2.3031	-12.4279	11.853	11.4131	5.14624	-13.5784	-10.4239	6.62512	19.6211	-20.423	-9.68359
23.3322	-6.65576	-24.4674	13.3635	-22.7188	-3.59729	17.0321	4.72729	-0.838257	27.0143	-11.7455	8.13684	9.56348	-10.1465	-0.972412	18.1725	5.75391	-3.46326	2.08032	19.9027	27.8677	3.6748	-15.9763	-11.9949	-15.9308	30.0968	-4.35278	7.02283	1.54407	10.7909	-6.28284	-10.1207	1.75427	8.47229	1.80908	-17.7848	4.21643	11.1405	-1.85986	-11.9772	12.088	11.9406	5.16418	-13.7426	-10.8972	6.57739	19.766	-22.0017	-9.4187
24.0741	-6.40271	-25.5988	13.746	-23.4696	-3.21826	17.4465	5.87048	-1.40747	27.0116	-11.8213	8.39917	10.5858	-10.5269	-0.580078	19.4266	5.87036	-2.45251	2.0636	19.834	28.0055	3.73694	-16.5584	-10.233	-14.5046	31.2019	-4.27307	6.87085	2.10681	10.5735	-6.21753	-9.91907	1.94092	9.15344	1.90796	-18.0244	2.93701	12.4758	-1.74109	-11.8104	12.3378	12.0961	5.13757	-13.87	-11.0009	6.08459	19.9062	-23.3829	-8.91968
25.6895	-6.35535	-26.1196	14.3733	-23.4751	-3.09802	17.8624	6.98889	-1.99243	26.999	-11.7091	8.53625	11.568	-10.6976	-0.019043	20.0957	6.11462	-1.29797	1.7926	19.8647	28.3729	3.53564	-16.9513	-8.9408	-14.1896	32.9336	-4.46497	6.89124	1.68591	10.3927	-6.44312	-9.76355	2.85486	9.71838	1.95728	-18.3113	2.22375	12.9702	-1.76917	-11.3105	12.6514	13.5646	5.06653	-13.9766	-10.7449	4.66504	19.9962	-23.5809	-7.94666
26.3866	-6.50977	-26.3846	15.2705	-23.2736	-2.80823	17.6145	7.94385	-3.23083	26.9304	-11.6492	8.53333	13.3601	-10.689	0.456421	20.7137	6.63232	0.398682	1.11853	19.7668	28.6832	3.32483	-17.5085	-8.8772	-12.3051	33.5735	-4.68652	7.19739	2.56433	10.5173	-6.68018	-9.99341	3.55994	10.3315	1.74097	-18.5957	1.31128	13.5474	-1.86194	-10.9416	12.8695	14.8918	5.07971	-14.0104	-10.9807	3.31665	20.1442	-23.967	-6.30249
26.9745	-6.89417	-27.0509	16.1538	-22.8496	-2.52966	16.7787	8.50684	-4.92786	26.5494	-11.6769	8.58411	14.7982	-10.6239	0.761108	21.3773	7.01562	1.15076	1.08789	19.632	28.9304	3.08716	-19.0156	-7.8562	-11.6171	34.4446	-4.85437	7.58032	3.97571	9.88647	-6.81018	-9.89099	4.22534	10.9529	1.30652	-18.6895	0.557861	14.8914	-1.82507	-10.8829	13.1196	17.0663	5.23254	-14.0372	-10.9014	2.53979	20.3082	-24.4587	-4.91772
27.1356	-7.52148	-27.2994	16.5343	-23.1971	-2.16394	15.9362	8.83179	-5.90161	26.4402	-11.8502	8.56323	15.9939	-10.6168	0.97876	21.9122	6.96826	0.695679	1.20166	19.6011	28.7599	3.18799	-20.5822	-6.53357	-9.99365	34.7369	-5.10986	7.67212	4.40784	9.28149	-7.06702	-10.1746	4.56567	10.944	0.981201	-18.6005	0.0216064	15.7566	-1.34033	-10.6167	12.0747	18.095	5.2915	-14.0675	-10.5593	2.00708	20.4187	-25.3661	-3.81934
27.4498	-8.15515	-27.3964	16.9156	-23.2412	-1.66809	15.2805	9.14221	-6.98108	26.6715	-11.8202	8.65271	17.329	-10.6205	1.27295	22.4153	7.09692	0.535645	1.27307	19.5203	28.4491	3.51965	-21.396	-5.37671	-8.60962	35.7147	-5.93115	8.61694	4.60657	8.50476	-7.4386	-10.3862	4.89807	10.9467	0.230713	-18.2833	-0.349121	16.2391	-0.838257	-10.4133	12.7358	18.4821	5.41553	-14.0516	-10.5024	1.9043	20.751	-26.261	-3.21753
28.6401	-8.69653	-27.4978	17.3295	-23.0464	-1.03772	14.7484	9.5741	-8.23413	27.082	-11.7882	8.66394	18.6516	-10.7081	1.63403	23.0613	6.85071	0.68457	1.10974	19.3361	28.2048	3.29102	-22.063	-4.71411	-7.77051	36.7085	-5.94128	10.1082	5.36609	7.20166	-7.24792	-10.5865	5.62109	10.9208	-0.352661	-17.8502	-0.826416	16.8817	-0.46936	-9.70361	13.2324	18.7474	5.30969	-14.2012	-10.8791	2.245	21.1377	-27.3752	-2.40759
29.1005	-9.53809	-27.5471	17.889	-23.3019	-0.499634	14.593	10.1012	-9.26074	27.1171	-11.6516	8.73401	20.5255	-10.7255	1.53857	23.5527	6.46667	0.566406	1.43457	19.4026	28.0005	3.36401	-22.6844	-3.72571	-6.37427	38.0981	-6.13428	10.9374	6.33105	5.87781	-7.1731	-11.0071	6.62146	10.8052	-0.521851	-17.0853	-1.17908	17.0061	0.110352	-8.33813	13.292	19.3724	5.56067	-14.1049	-11.5695	1.94836	21.7963	-27.9346	-1.32727
29.7474	-10.1698	-27.5485	18.509	-23.4104	0.220825	14.4926	10.8793	-10.376	27.0516	-11.2163	8.79272	21.3768	-10.5481	1.04553	22.1952	6.39294	0.126953	1.69385	19.7484	27.7347	3.4187	-23.6327	-3.57812	-6.03503	39.6815	-6.60571	11.4078	6.53357	5.14526	-7.0625	-11.4615	7.28528	10.5768	-0.744385	-16.6123	-1.43604	18.5697	-0.0279541	-7.87988	13.8649	22.0454	6.11548	-14.0704	-11.5812	1.79688	22.4895	-28.3118	0.0672607
30.1797	-10.8127	-27.6019	19.7235	-23.5695	0.861328	14.0779	11.323	-10.9788	27.14	-11.1821	8.79932	22.2914	-10.0642	0.727051	21.8783	5.93628	0.0805664	1.80896	19.9214	27.1687	3.8313	-23.889	-2.87292	-5.40955	41.0905	-6.5542	11.6099	6.89001	4.58118	-6.87549	-12.1357	7.29309	10.7377	-0.779297	-16.2861	-1.60486	19.5627	0.0782471	-7.37866	15.9176	22.9471	5.97192	-13.7687	-11.994	2.552	22.9338	-28.6348	1.12805
30.5166	-11.5216	-27.7117	20.5095	-23.6257	1.61511	13.4833	12.1589	-11.3599	27.1826	-11.1716	8.72949	23.5526	-9.52161	1.04443	21.4334	6.44714	-0.220215	1.77991	20.276	26.8337	4.21167	-24.4806	-1.24963	-4.87512	42.0608	-6.63025	11.817	7.3822	3.17468	-6.55164	-12.4027	7.65002	10.7452	-0.705933	-15.525	-1.36182	20.4724	0.348511	-7.44556	17.1675	23.3297	6.12939	-13.6655	-12.5499	2.9082	22.6482	-29.5793	2.33044
31.1993	-11.8198	-27.7451	21.1115	-23.676	2.17236	12.7424	12.7599	-10.4907	27.1722	-11.0405	8.75806	25.0165	-9.27209	1.20886	20.8141	7.08594	-0.510498	1.54712	20.5551	26.5758	4.50769	-24.7086	-0.0500488	-4.79492	42.9087	-6.828	12.2543	7.90491	2.39502	-5.95972	-12.5028	8.02148	10.8342	-0.622803	-14.6079	-1.08655	20.9825	0.824951	-9.29602	17.9875	24.8108	6.18164	-13.016	-13.2891	3.63306	21.2908	-30.4103	5.026
31.8954	-11.5959	-27.8694	21.2703	-23.8893	2.34155	12.7688	13.4398	-9.11804	27.3794	-10.9027	8.89526	25.6416	-8.78198	1.52612	19.8391	7.3894	-1.3114	1.1781	20.8835	26.4153	4.66565	-25.1084	-0.0686035	-3.71167	43.3448	-7.25574	12.8571	8.12463	1.61133	-5.48486	-12.6431	8.66467	11.1355	-0.442017	-14.2347	-0.396729	21.1572	1.03442	-11.3013	18.5895	25.507	6.20667	-12.2013	-13.6407	4.45544	20.4882	-30.4485	5.69873
33.1643	-10.7783	-28.1392	21.2417	-24.051	2.99353	12.3188	14.6458	-6.77844	27.3981	-10.939	9.00598	25.8582	-8.85779	1.7959	19.2048	6.93237	-1.58667	1.40222	21.166	26.2386	4.90234	-25.7316	1.17029	-2.87109	43.948	-7.54761	13.0347	9.24255	0.245483	-5.34875	-12.6396	9.76636	11.2953	-0.170776	-13.6613	-0.0252686	21.1757	1.75793	-12.0919	19.4044	25.8767	6.25769	-11.7072	-14.9552	5.21985	19.5204	-30.9545	6.33276
33.6581	-10.3395	-28.2413	21.0436	-24.2711	4.17798	12.374	15.3402	-5.76758	27.347	-10.9176	9.07263	27.6616	-9.17517	1.81543	19.0751	6.49695	-3.26746	1.74915	21.6154	26.8033	5.50415	-27.3765	1.78979	-2.35205	44.4688	-7.83667	13.4064	9.8291	-0.402954	-4.95227	-12.7576	9.60339	11.6908	0.200562	-12.5041	0.0817871	21.3833	2.18726	-12.5975	22.4875	26.0201	6.57983	-10.5979	-16.5465	6.70142	19.0784	-31.3132	8.04492
35.2797	-9.64624	-28.389	20.9868	-24.1892	4.80286	12.2168	15.9988	-4.98425	27.4489	-10.9213	9.17847	29.0597	-9.62537	1.70581	19.0049	6.44177	-5.37134	1.86194	21.8101	27.6268	5.9043	-28.1813	3.03027	-1.9906	45.1945	-7.94751	13.973	10.2017	-1.94739	-4.37122	-13.2654	9.43262	12.1877	0.460327	-11.3611	0.48877	21.6064	2.38062	-12.7686	23.6327	26.6592	6.65442	-10.6498	-17.2368	7.54578	18.8909	-29.7327	9.25989
36.752	-9.83337	-28.4706	21.1122	-24.0704	5.39526	12.0795	16.9369	-5.01575	27.7371	-10.7462	9.24902	30.4434	-10.0914	1.65295	18.9327	6.41333	-5.75879	1.89111	22.3566	28.3822	6.36694	-28.5687	4.85364	-2.02649	45.9932	-8.04968	14.4377	10.5703	-2.7926	-3.97095	-13.2924	9.01123	11.6963	0.540527	-10.5864	1.08508	21.6738	2.90393	-12.9969	24.9028	27.4734	6.7146	-10.4081	-17.8723	6.35889	19.1375	-28.9037	10.8909
37.8789	-10.2329	-28.7156	20.989	-24.0584	5.53479	12.0881	18.4266	-5.26184	27.8768	-10.6243	9.24463	31.1978	-10.3457	1.72607	18.5057	6.34778	-6.85339	2.1322	23.0383	29.4966	6.39087	-28.8447	4.76489	-1.68481	46.9915	-8.12048	15.5222	11.4338	-3.40918	-3.401	-13.4529	8.73254	10.7633	0.583984	-9.5415	1.2041	21.8981	3.35815	-12.5332	25.3364	28.6252	6.89697	-10.2111	-18.1259	5.76318	19.3241	-28.864	11.4906
38.6481	-10.1304	-29.2753	20.7207	-24.1351	5.77612	12.0504	19.1083	-5.47888	28.1016	-10.2914	9.18518	32.0717	-10.3187	1.50854	17.6941	6.32056	-7.64539	2.43811	23.5956	30.3746	7.41638	-30.0698	5.31689	-1.42896	47.382	-8.35425	16.1881	11.9703	-4.1333	-2.73181	-13.5935	8.97961	10.0353	0.313477	-8.3114	0.208984	21.9813	4.729	-12.1411	26.4805	29.8121	7.13855	-9.77966	-18.48	5.54822	19.026	-27.6472	12.0132
39.735	-10.0396	-29.4604	20.5488	-23.4159	5.8833	11.9779	20.0002	-5.47437	28.2241	-10.3851	9.15283	33.103	-10.6782	1.22302	17.3409	6.66138	-9.15747	2.53027	23.9077	32.2528	9.11401	-31.3674	6.18347	-1.36011	48.1755	-8.89416	16.5861	12.1143	-4.96777	-2.28235	-13.7888	9.0647	10.2095	-0.0587158	-7.39246	-0.145996	22.0925	4.83923	-11.8096	27.2325	30.1708	7.3761	-9.3584	-18.7045	5.51953	19.0593	-26.9436	12.4862
40.8157	-10.1605	-29.5841	19.6316	-22.2288	5.83521	11.5114	21.1885	-5.40381	28.4241	-10.4983	9.08264	34.2927	-11.7372	0.968506	17.0973	7.31396	-11.2726	2.47302	24.1111	33.5975	10.2134	-32.6935	7.04163	-1.55212	49.3102	-9.11658	16.792	12.4644	-6.19739	-1.79736	-14.3657	8.48657	10.9177	-0.328613	-5.69421	-0.676758	21.6868	5.0387	-11.5111	29.3854	30.5187	7.5061	-8.68616	-19.2117	5.71045	18.9441	-25.7465	13.4542
42.2203	-10.1868	-29.7203	18.4222	-21.3741	5.60571	10.7502	22.7794	-4.90796	28.3785	-10.8123	9.06995	35.2441	-12.8235	1.03552	17.0635	8.17078	-12.9814	2.23889	24.4371	34.2427	10.6573	-33.3511	8.09888	-2.07104	50.2848	-8.92969	16.9076	12.7694	-6.83496	-1.08447	-14.5325	8.15955	11.0067	-0.501343	-4.86365	-2.71863	21.2782	5.44861	-10.957	30.748	30.5308	7.64917	-8.35559	-19.326	5.48694	18.4703	-25.6443	15.2936
43.3464	-10.2815	-30.1063	17.6008	-20.8486	5.6427	10.0526	23.3292	-4.71277	28.309	-10.7616	9.06128	36.3176	-13.2378	1.51697	16.8778	8.29639	-13.5219	2.0177	24.5374	35.1494	12.1998	-33.9131	8.50647	-2.35535	51.1324	-8.74146	16.8989	12.9136	-7.23474	-0.886475	-14.7852	8.01721	10.9167	-1.97986	-3.74084	-3.63855	20.7859	5.64587	-10.8372	31.0337	30.556	7.92834	-8.08081	-19.6156	6.42566	18.1444	-26.1172	16.0941
44.0027	-10.2684	-30.3585	17.2811	-20.1544	5.41833	9.42957	23.8245	-5.01733	28.3392	-10.6357	9.05798	37.4514	-13.5948	1.52576	16.8212	8.05139	-14.6061	1.81787	24.3292	36.1378	14.0853	-34.485	8.65564	-2.91125	52.5547	-8.51062	16.9189	13.3046	-7.85828	-0.468262	-14.8701	7.95398	10.4675	-3.60767	-2.56946	-3.37952	19.8816	5.78564	-10.7297	31.5289	30.3726	8.38965	-7.82471	-17.642	7.8374	18.1442	-26.9501	16.8243
44.8324	-10.4625	-30.9722	16.9406	-20.0144	5.37	8.62488	24.3761	-4.64758	28.1348	-10.5366	9.01465	38.3269	-13.7329	1.38708	16.7452	8.22302	-17.1716	1.53687	24.093	37.6682	15.5564	-35.1901	8.97522	-3.85339	53.0798	-8.60889	16.9257	12.999	-8.3147	0.202637	-14.9678	7.91833	10.0361	-3.76807	-1.65942	-3.20422	19.6034	5.81982	-11.6274	32.9272	30.085	8.82507	-7.37476	-17.7263	8.60657	17.8607	-27.3157	17.1113
45.5769	-10.7174	-31.2228	17.1145	-20.3944	5.40784	7.94214	24.9274	-4.06677	28.1492	-10.3657	9.01318	38.5686	-14.0178	1.1853	16.6834	8.38977	-18.3805	1.50415	23.6826	38.4476	15.9147	-35.9003	10.0406	-4.08496	53.8418	-8.7605	16.9928	12.8754	-9.10681	0.26062	-15.0106	7.96094	10.0829	-4.28687	-0.90271	-2.45178	20.1902	5.85645	-12.6206	34.3151	29.8214	9.23022	-7.08398	-17.3569	10.2863	17.8573	-27.3698	18.7782
46.6241	-10.6001	-31.4559	17.2643	-20.6598	5.52246	6.66895	25.7639	-3.47766	27.8887	-9.98694	9.08411	40.2363	-14.5242	1.02722	16.6179	8.14136	-18.999	1.57434	23.318	39.2705	16.3125	-37.2004	10.9946	-4.54077	55.0251	-9.01721	17.022	11.8815	-9.74329	0.29541	-14.7982	7.698	10.3063	-4.64282	-0.439331	-1.52917	20.7928	5.73108	-14.0662	34.5248	29.3826	9.47058	-6.84595	-16.5399	10.828	17.4371	-27.4347	19.849
47.4703	-10.5686	-31.6246	17.4131	-20.8907	5.48645	5.87537	25.7393	-3.61938	27.5131	-9.82117	8.95251	41.938	-15.2769	0.9104	16.4358	7.92004	-20.5011	1.68213	23.108	40.2057	17.5127	-38.33	11.4457	-5.24915	56.1577	-9.00989	16.6959	11.0271	-10.1328	0.401855	-15.0422	7.52527	10.3176	-4.47461	-0.209351	-1.3623	21.434	5.67871	-15.182	32.869	28.7642	9.92383	-6.68945	-16.3389	11.5237	17.1798	-27.3756	21.3096
48.3801	-10.3353	-32.1691	17.5674	-20.3903	5.32202	4.55969	25.689	-4.51855	26.9496	-9.99268	9.1333	42.9141	-15.5935	0.943237	15.3641	7.68445	-21.507	1.60144	22.7711	40.9338	20.0162	-38.6912	11.6212	-6.13879	57.6564	-8.94226	15.5012	10.0959	-10.5656	-0.296143	-15.0045	7.02368	10.3121	-4.31506	0.258179	-1.08655	22.7949	5.86572	-16.0486	33.2405	28.1926	10.2816	-6.67578	-15.8954	12.6874	16.9934	-27.3467	21.8771
49.6321	-10.1527	-32.632	17.9447	-19.653	5.16748	3.16077	25.6383	-6.12451	26.3961	-10.5422	9.25977	43.4718	-16.2555	1.04041	15.032	7.56177	-21.8116	1.526	22.4696	42.8102	20.6897	-39.0348	11.8062	-7.09631	58.7997	-9.28284	14.8854	9.40625	-10.7246	-1.28845	-15.2753	6.38757	10.3002	-2.90723	0.956421	-1.00391	23.5127	5.86951	-17.1216	34.2335	27.6517	10.4412	-6.72217	-15.2255	13.1832	16.7852	-27.1549	22.9807
50.738	-10.1904	-33.0836	17.8805	-18.9183	5.16528	2.58728	25.6134	-7.07263	26.2037	-10.7463	9.37024	44.0941	-16.5845	0.948242	14.2012	7.3053	-23.7883	1.57336	22.6344	44.5001	21.5004	-39.0056	11.9893	-7.42627	59.1316	-9.69556	13.7224	9.05115	-11.3519	-2.34851	-15.4736	5.12256	10.5125	-0.980225	1.4209	-0.663452	24.15	5.96216	-17.5719	34.1112	26.776	11.0642	-6.65869	-14.6235	14.0469	16.7305	-26.6635	24.5223
51.7856	-10.22	-34.1104	17.9623	-18.3278	5.2915	1.92676	25.5551	-7.65344	26.0331	-10.8966	9.22241	45.6409	-16.7764	1.02441	12.8228	6.98828	-25.4722	1.68726	22.6206	45.9849	23.2061	-38.7618	12.225	-7.75745	60.1917	-9.83521	12.0148	8.2644	-11.9797	-3.82214	-15.6873	4.82166	10.8767	0.957275	1.82043	-0.498169	25.0518	5.54919	-17.5869	34.2773	25.8937	11.5724	-6.86694	-13.5509	15.4202	16.6249	-26.1136	25.6329
51.9957	-10.2615	-34.8024	18.0543	-17.9573	5.72461	1.55078	25.2699	-7.70154	26.1533	-10.9932	9.19189	47.0621	-17.5	1.27856	11.8662	6.52417	-26.4441	1.61597	22.3567	46.5341	25.3435	-38.7614	13.2959	-8.56348	61.5688	-10.0846	10.1108	7.35559	-12.5796	-4.91211	-15.6947	4.39294	11.4324	1.43787	2.41541	0.477661	25.6877	5.55969	-17.6099	34.3829	25.3322	11.9551	-6.98108	-13.4091	15.9286	16.2838	-25.7604	26.8323
52.224	-10.2236	-35.5562	18.058	-17.3132	6.32068	0.653687	24.4701	-7.96423	26.3879	-11.4269	8.86035	47.5205	-17.9677	1.59937	11.1798	5.9657	-27.6677	1.55042	22.3185	48.4935	26.1765	-38.8243	13.3317	-9.15076	63.0061	-10.092	9.01929	6.26099	-13.8269	-5.66931	-15.571	4.1731	12.4083	2.1803	2.88989	1.297	26.929	5.6001	-17.8784	34.7206	25.1206	12.2057	-7.30103	-13.2343	13.9023	16.0557	-26.3709	27.3207
52.5996	-9.94446	-36.342	18.0432	-17.8042	6.53174	0.0184326	24.0308	-7.54187	26.3873	-11.7831	8.46704	48.2245	-18.2418	2.0708	10.8297	4.65747	-29.1544	1.43579	22.0708	49.8212	26.6916	-38.6356	13.3933	-9.84131	63.631	-10.3472	8.07678	5.84631	-14.1818	-6.19922	-15.3127	3.93628	13.0074	2.24194	3.48962	2.61743	28.2318	5.52673	-17.7655	34.4475	24.9335	12.4696	-7.50146	-13.1602	12.176	15.7932	-27.1802	28.7977
53.1276	-9.59607	-36.8759	17.7665	-18.3816	7.09326	-0.504883	23.113	-6.9176	26.2827	-12.507	7.78577	49.0415	-18.4249	2.98376	10.4266	3.39661	-30.2773	1.53564	21.8016	50.4874	27.7382	-38.3931	13.1665	-10.6627	64.569	-10.5603	6.94812	5.82031	-14.9977	-6.57251	-15.3058	3.60217	13.9769	2.50769	3.99976	3.42542	28.8922	5.56665	-17.8521	34.5006	25.1794	13.0836	-7.80225	-13.3582	10.3428	15.6361	-27.8781	29.9987
53.644	-9.48206	-37.9602	17.6847	-18.7466	7.63379	-1.18909	22.489	-6.33008	26.2269	-12.7451	7.25183	50.652	-18.1675	3.77124	9.6748	3.14111	-31.3248	1.62402	21.474	51.6149	29.5198	-38.2039	12.5801	-11.4042	65.6111	-10.5959	4.7207	6.00525	-15.6821	-7.06238	-15.2496	2.87366	14.6643	2.90686	4.30017	4.33289	29.4637	5.72375	-17.7068	34.0831	25.0139	13.6022	-8.11182	-13.3986	9.34045	15.4457	-27.9861	31.8649
53.5979	-9.33594	-38.4792	17.6058	-19.1799	8.52551	-1.67676	21.8093	-5.62927	26.2019	-13.3506	6.96558	51.8361	-17.9839	4.86011	9.73645	2.68921	-32.824	1.32373	21.2534	52.6379	30.9512	-37.9181	12.0599	-11.713	66.8959	-10.3827	3.10791	6.08752	-16.0004	-7.396	-15.3884	2.5968	14.786	3.13721	4.95728	5.67017	31.2711	5.78906	-17.3397	33.6351	24.6461	13.5938	-8.31445	-13.2389	8.73401	15.4736	-28.2932	33.2001
53.4379	-8.98169	-38.8767	17.3148	-19.266	9.56018	-1.91748	21.4565	-4.90466	26.1886	-13.9086	6.73816	52.6938	-17.9973	5.86572	10.1279	1.65198	-34.3004	0.208008	21.0743	53.7473	31.3345	-37.6066	11.2094	-12.3584	68.1709	-10.54	2.4248	6.16858	-16.511	-7.9082	-15.6068	2.50354	14.6432	3.20801	4.65442	7.0144	31.5779	5.76294	-17.1599	33.2887	24.3693	13.7367	-8.50269	-13.2609	8.19531	15.4189	-27.9951	33.5924
53.1068	-8.80933	-39.1956	17.1357	-19.6384	10.3585	-2.3772	20.9331	-4.49353	26.2295	-14.0199	6.49036	53.6739	-18.0342	6.25427	10.7844	0.405884	-34.8741	-0.745239	20.8091	53.7013	32.6414	-37.7852	11.4221	-12.4598	68.5782	-10.6217	1.62842	6.27563	-16.6238	-7.56702	-16.0415	2.39465	13.4244	3.09985	4.62488	9.17773	31.9492	5.84827	-17.177	33.4382	24.1243	13.991	-8.94299	-12.0227	7.75195	15.4448	-28.0005	34.7721
53.0623	-8.51575	-39.4758	16.3667	-20.3435	11.1748	-2.75537	20.5759	-3.7439	26.4218	-14.4337	6.14038	54.9395	-17.7218	6.31165	11.6584	-0.565674	-35.5984	-1.97607	20.5345	53.6106	33.215	-37.9435	11.6	-12.7382	69.7865	-10.5731	0.254883	6.32629	-17.2554	-6.70239	-16.5707	3.00452	12.4301	2.70081	4.61719	10.3582	33.3917	5.8075	-17.1462	33.9153	24.1678	14.0399	-9.41907	-14.8804	6.89343	15.3901	-28.2246	35.9409
53.2264	-8.00452	-39.8124	15.4901	-20.2731	11.7755	-3.0321	21.0072	-3.23792	26.4476	-14.589	6.18372	55.6467	-17.1788	6.45422	12.0835	-2.41064	-37.2395	-2.86548	20.3629	53.619	34.9657	-38.3379	11.5494	-13.1667	70.6577	-10.7738	-1.21436	6.25073	-17.8434	-6.03613	-16.9805	3.573	11.1371	2.16101	4.82849	12.488	33.7845	5.6748	-17.1892	33.3893	24.3479	13.9103	-9.66614	-14.8815	6.2052	14.8666	-29.0604	36.5641
53.364	-7.82751	-40.2517	15.1226	-19.78	13.015	-3.61157	21.3203	-2.2688	26.3356	-15.1652	6.34595	56.4553	-16.8141	6.28357	12.9239	-3.18201	-39.073	-3.16211	19.8074	53.4319	36.7725	-38.8186	10.9041	-13.4731	72.4033	-11.0839	-2.0144	6.24695	-18.4216	-5.98999	-17.7054	4.13293	10.3313	2.01013	4.86975	13.0153	33.5057	5.68408	-17.3439	33.0934	24.3583	13.8545	-9.9906	-15.431	5.7146	14.0682	-29.8212	38.0153
53.2299	-7.54077	-40.7878	14.5762	-19.0596	13.5116	-3.73071	21.5226	-1.5907	26.1924	-15.5909	6.3689	57.4197	-16.5221	5.44202	14.6028	-4.23962	-39.5146	-4.49011	19.3949	53.1885	36.9424	-38.4807	11.2197	-13.8258	73.344	-11.1494	-3.255	6.19971	-19.0785	-5.9519	-18.405	4.79016	9.74121	1.95154	4.81274	15.3082	32.7771	5.69788	-17.9114	33.0557	24.3966	13.87	-10.3724	-17.7493	6.35938	12.7007	-30.932	39.5439
53.1423	-7.13	-41.506	14.0317	-18.869	13.9336	-3.93677	21.645	-0.768188	25.9854	-15.7819	6.47522	58.2494	-16.1793	4.24255	15.9685	-6.02649	-40.1659	-5.90027	18.8936	52.9249	37.9001	-38.0211	10.9163	-14.0006	73.8691	-11.6122	-3.72986	6.22034	-19.5181	-5.90063	-18.5824	5.21277	9.10107	2.15454	5.06848	16.7461	32.6919	5.7655	-18.0188	30.9471	24.3881	13.7081	-10.9163	-19.2314	6.91772	11.798	-31.1614	41.0229
53.0979	-6.6947	-42.1427	13.1494	-18.8196	15.5817	-4.16833	21.688	0.293091	25.6671	-15.9634	6.64783	59.1663	-15.9755	3.28052	17.3511	-7.00427	-40.4531	-6.16431	17.9949	52.932	38.9841	-37.5342	10.5754	-14.0765	74.8418	-12.0579	-4.56726	6.22571	-20.8202	-5.94678	-19.2935	6.26538	8.69531	2.34448	5.27161	17.2312	32.0375	5.81091	-18.3893	29.7205	24.1531	13.7286	-11.2493	-19.9982	7.18396	11.4073	-31.9932	42.458
53.0636	-6.23291	-42.3105	11.7389	-18.9952	16.3949	-4.39331	21.5627	1.24451	25.2006	-15.9926	6.73169	59.8483	-16.1207	1.94421	18.8397	-7.95081	-41.222	-6.1676	17.3872	53.0797	40.7847	-37.3282	10.3467	-14.2135	75.3372	-12.8528	-5.64807	6.17175	-21.4087	-5.99341	-21.2157	6.9563	8.74622	2.70801	5.43079	19.6525	31.1416	5.87061	-18.4791	29.0046	24.1053	13.9349	-11.4867	-21.4225	7.05994	11.6582	-32.8535	43.8062
53.2388	-5.40906	-42.9622	11.3724	-19.2706	16.9602	-4.6239	21.7876	2.27454	24.6294	-15.9426	6.74988	60.3282	-16.6503	0.471802	20.3347	-8.29663	-42.3417	-6.78284	16.9359	53.3376	41.7728	-37.2571	9.6687	-14.3998	76.6772	-13.3468	-6.34473	6.14783	-21.8325	-5.90271	-22.8553	8.34546	8.9259	2.68555	5.62109	20.2415	29.3518	5.83997	-18.6144	27.4753	24.0005	13.3134	-11.6914	-22.2159	7.26465	12.1056	-33.5721	44.1117
53.7743	-5.09448	-43.6768	10.7139	-19.3845	17.0041	-4.57812	22.3041	3.19885	24.1449	-15.6951	6.81262	61.2273	-16.8423	-0.595093	21.2946	-9.26074	-43.5005	-7.45337	16.3057	53.3373	42.4753	-37.0741	9.24829	-14.7629	77.9377	-14.0808	-6.97729	6.11523	-22.4803	-5.2439	-23.6639	8.68335	8.72302	2.68323	5.75928	21.3188	29.0475	5.79175	-18.7622	26.0935	24.0327	12.9691	-12.1334	-22.1588	7.14587	13.3274	-35.21	45.2307
53.8489	-4.34521	-44.2223	10.1835	-19.1249	16.578	-4.41772	22.7817	4.26355	23.6094	-15.5461	7.07849	61.9048	-17.4941	-1.50293	22.166	-10.5892	-43.9706	-7.19421	16.1727	53.313	43.1704	-36.996	8.33923	-15.0719	78.7985	-14.2596	-6.98694	6.22803	-22.8219	-4.40771	-23.9828	8.97681	8.31287	2.76501	6.01282	21.6934	29.182	5.74133	-18.6746	25.7078	24.0697	12.5925	-12.5352	-22.0056	6.93579	14.3121	-36.2163	45.7316
53.778	-3.96997	-44.9261	9.37292	-18.1251	16.6165	-3.90002	23.3124	4.96545	23.074	-14.86	7.42468	62.2366	-17.0544	-1.87109	23.2291	-11.035	-45.9677	-6.51953	16.2682	53.2325	43.2336	-36.9261	7.04883	-15.4615	79.625	-15.2	-6.46497	6.30261	-23.3114	-3.78601	-25.2428	9.31238	7.90039	2.89929	5.82556	22.281	29.0625	5.6593	-18.8738	25.6864	24.0292	11.7386	-12.8857	-21.5709	6.4657	16.3169	-36.7449	46.9156
54.2266	-3.68372	-44.9117	8.47302	-17.2721	16.5875	-3.22351	23.9679	6.10315	22.5804	-13.792	8.30298	62.3756	-16.4312	-2.18469	24.8512	-12.5671	-47.6479	-6.30469	16.441	53.281	43.2854	-36.8497	6.52612	-15.7396	80.3185	-16.4641	-6.40308	6.24475	-23.9309	-3.43921	-26.2761	10.3097	7.70337	2.82507	5.44897	23.175	29.1937	5.57947	-19.0365	25.6387	24.1644	11.387	-13.2216	-21.4602	6.33777	17.1122	-37.1251	48.3634
54.5847	-3.48096	-44.7816	7.81226	-16.5232	16.5719	-2.54102	25.4192	6.81238	22.3962	-12.8191	8.79431	62.479	-16.1919	-3.30042	26.1125	-13.0275	-48.4005	-6.11218	16.3596	53.1759	43.5489	-36.5208	5.86475	-15.9275	80.8193	-17.0688	-6.37341	6.11829	-24.2086	-2.76782	-27.2098	11.0441	7.45422	2.72815	5.04065	24.0824	30.1912	5.53638	-19.1191	26.0306	24.4741	11.286	-13.8662	-21.3704	5.88428	17.0657	-37.3693	49.5308
54.9777	-2.81836	-44.6824	7.35938	-15.637	16.4374	-2.28247	26.0647	7.70837	22.2949	-12.3854	9.51001	62.6089	-15.8745	-4.56335	26.6947	-15.3667	-49.3618	-5.99731	15.9816	52.9803	43.5015	-36.6251	4.89502	-16.1793	80.0211	-17.5095	-6.65442	6.06128	-24.2526	-2.12451	-27.9172	11.2126	6.90271	2.34839	4.75439	24.968	31.0854	5.3446	-18.984	27.3622	24.8958	11.2335	-14.5504	-21.1158	5.84412	16.696	-37.6908	49.8558
55.5527	-2.48413	-44.5602	7.07556	-14.4271	16.1332	-2.24487	26.8866	8.34949	22.1199	-12.136	9.82178	62.4885	-16.0642	-5.18835	27.8956	-16.1755	-50.6846	-5.86877	15.7679	52.8423	43.6409	-36.9745	4.28662	-16.4656	80.495	-17.6715	-7.25415	6.1178	-24.271	-1.7655	-28.1888	11.4512	5.97827	1.57056	4.22412	25.1084	33.0853	5.26807	-17.9465	30.0247	25.165	11.0647	-15.1642	-21.3286	5.4574	16.8921	-37.7953	49.9751
56.0723	-2.58435	-44.5686	7.06165	-13.5814	15.7007	-2.29089	27.3304	9.29138	22.0906	-11.7727	10.6636	62.4126	-15.948	-5.73828	28.8907	-16.4868	-51.5856	-5.6897	15.6382	52.9237	44.5621	-37.2904	3.35645	-16.72	81.462	-18.0609	-7.59314	6.07898	-24.2629	-1.56616	-28.714	11.5729	5.35205	0.918457	3.36572	25.4622	33.4072	5.26367	-16.887	32.2594	24.9547	10.9668	-15.7754	-21.7484	5.01953	16.9226	-38.025	51.6108
56.2405	-2.04724	-44.5776	6.98767	-12.954	15.4674	-1.71802	27.7013	9.88574	22.0277	-11.4001	11.2018	62.4828	-15.672	-5.7771	29.7495	-17.0499	-53.182	-5.44275	15.4008	52.9973	45.6288	-37.9971	1.73889	-16.8618	82.0625	-18.0502	-8.37073	6.06201	-23.7571	-0.390259	-30.179	11.8322	4.18811	0.420654	3.16345	25.6774	31.8586	5.21582	-16.3008	33.4114	24.1951	10.9104	-17.0967	-22.3278	4.78967	16.7688	-37.6816	54.0137
56.5972	-1.98376	-44.5186	7.45142	-12.869	14.9633	-1.77283	28.1182	10.8108	21.906	-11.0704	12.0584	62.5481	-15.4491	-5.72266	30.5764	-16.7821	-53.6216	-4.69421	15.077	52.8484	46.3048	-38.4348	0.69165	-17.2986	82.118	-17.962	-8.69971	6.02795	-23.2421	1.46448	-30.7461	12.0568	2.43738	0.384399	2.73804	25.8317	30.0314	5.15491	-15.3513	34.642	23.4469	10.0289	-17.9597	-22.8091	5.32556	16.7986	-37.5106	54.9399
56.7285	-2.32568	-44.5022	8.08118	-11.3606	14.8605	-1.63074	28.8989	11.5642	21.5896	-10.9897	12.7806	62.7134	-15.0663	-5.75842	31.54	-14.6355	-55.0649	-3.74731	14.774	52.806	46.2989	-39.4504	0.410034	-17.7286	82.2406	-17.3992	-9.20459	6.08923	-22.7985	2.00305	-31.6846	12.1418	1.76282	1.2085	2.27795	25.5741	29.246	5.21155	-14.4207	34.8168	22.3353	9.19727	-18.3033	-23.2473	6.04993	16.8632	-37.1858	55.0295
56.882	-3.37537	-44.2919	8.4082	-9.73584	14.6217	-1.63867	29.4119	12.1832	21.1079	-10.9864	13.4395	62.9683	-15.506	-5.7113	32.6997	-14.1294	-56.4648	-2.29504	14.2721	52.7201	46.1809	-40.2478	-0.246582	-17.9886	82.9738	-16.6735	-9.39978	6.05298	-22.6647	2.4657	-31.9496	12.5193	1.84729	1.38293	1.86133	25.2711	28.2976	5.22119	-12.9607	34.7333	21.7841	8.77087	-19.4647	-23.2219	6.9043	16.8245	-37.047	55.4827
56.8466	-4.02112	-44.2328	8.86072	-8.52625	14.4651	-1.67322	30.1627	13.3287	20.8315	-10.944	14.4204	63.025	-16.6025	-5.68689	34.5598	-12.9185	-57.4978	-1.21716	13.5673	53.4609	46.2581	-41.0297	-0.714355	-18.2352	83.116	-15.5531	-9.99988	6.05432	-22.578	2.84668	-32.444	13.8936	3.95203	1.8407	1.60266	25.0557	28.3301	5.21521	-12.0619	34.6035	21.1632	8.79053	-20.3688	-23.5121	7.99243	16.7595	-36.4028	57.1735
56.6516	-4.70178	-44.3232	9.51941	-7.98169	14.356	-1.74719	30.7463	14.333	19.6248	-10.8555	15.3927	63.4928	-17.1713	-5.7157	36.2908	-11.7372	-58.4786	-1.11096	13.0227	54.0612	45.6342	-41.5969	-1.28748	-18.4647	83.3605	-13.9027	-10.2195	6.14612	-22.8306	3.08057	-32.9435	14.8855	5.37988	2.10144	1.57483	25.0422	28.2544	5.26196	-11.16	34.5902	21.0609	8.73364	-20.8817	-23.8964	8.31616	16.7902	-35.251	59.2361
56.3452	-5.8197	-44.3639	10.5044	-7.52808	13.7104	-2.15649	31.103	15.3524	18.5807	-11.0758	16.4757	63.807	-17.5339	-6.35352	36.9602	-11.5321	-59.8109	-0.380615	12.3193	55.2811	45.1899	-42.769	-2.12109	-18.8972	83.4594	-13.5121	-10.4247	6.14124	-23.201	3.60229	-33.3446	15.6005	6.11121	2.06848	1.20203	25.1506	28.5912	5.20691	-10.3744	34.3505	21.1538	8.80066	-21.9423	-24.3168	8.78528	16.9755	-34.4537	60.2275
55.5162	-6.78748	-44.3771	11.2681	-6.77771	13.4406	-2.36572	31.4542	16.103	17.1926	-11.3368	17.3297	63.9409	-17.7042	-7.25989	38.6787	-11.4786	-61.1246	0.344238	12.1628	56.1005	44.5038	-43.4509	-3.25757	-19.2438	83.7524	-13.1865	-10.7573	6.11121	-23.3784	4.11914	-33.8113	16.918	6.42676	2.06006	0.900269	25.0709	28.6367	5.22754	-9.45264	34.3579	21.3612	8.87024	-24.4241	-24.5654	9.28027	17.1606	-33.9005	60.9431
54.3031	-7.0907	-44.6714	12.0872	-5.58972	13.1499	-3.20789	31.9795	16.5865	16.1669	-11.9285	18.1088	63.8717	-17.7671	-7.76611	40.0728	-11.5951	-61.7457	1.84229	11.8783	56.9403	43.6237	-44.1045	-4.25281	-19.8621	83.9777	-13.1792	-11.3433	6.04419	-22.8925	4.61047	-34.2822	18.0666	6.85498	2.12927	0.638306	24.9902	29.5463	5.18701	-8.4292	34.0634	21.3884	8.93384	-25.2975	-24.5916	9.34229	17.2576	-33.6991	61.1877
53.4397	-6.96436	-45.2402	12.5044	-4.19885	12.6367	-3.33472	32.3182	17.4065	15.5751	-12.6846	19.0303	64.0448	-17.8405	-8.50989	41.3857	-11.5927	-62.0206	2.22913	11.3772	57.4922	42.4388	-44.9021	-5.08887	-20.5854	84.4866	-13.2526	-12.3677	5.87793	-22.9325	5.05054	-34.9915	18.5226	7.5946	2.19409	0.198608	25.0474	31.1758	5.17932	-8.00757	34.3052	21.6207	9.25037	-25.6288	-24.774	8.99609	17.4674	-32.8074	62.0408
53.2051	-7.12854	-45.5206	12.8481	-3.58411	12.481	-3.05396	32.7426	18.333	14.8351	-13.2145	19.7795	64.1567	-17.9138	-9.22131	41.9429	-11.5529	-62.1953	2.58447	11.1665	59.1182	41.3735	-46.4041	-5.58667	-21.5371	85.4082	-13.3353	-12.7996	6.15454	-22.8749	5.3877	-34.7808	19.408	8.61816	2.49097	-0.266846	24.5818	32.6221	5.15466	-7.10425	34.4052	21.717	10.0839	-25.7065	-24.885	8.63464	17.507	-32.4908	62.7281
52.9567	-7.151	-45.8771	13.2661	-2.93811	11.2772	-3.82495	33.0742	19.1976	14.3081	-13.6577	20.697	64.1875	-17.8728	-9.98975	42.2814	-11.5228	-62.321	3.36145	10.9216	60.4597	40.2135	-47.2305	-6.11206	-21.694	85.8235	-13.1805	-13.3734	5.81189	-23.2765	5.42139	-35.3402	20.3724	9.36169	2.87036	-0.518555	23.9213	33.5637	5.26831	-6.35791	34.5892	21.965	10.4038	-26.7087	-24.9993	8.46375	17.5892	-32.7472	63.9634
52.8707	-7.14026	-46.0823	13.8661	-2.35718	10.3715	-4.36121	33.4565	19.802	14.0853	-14.1167	20.8365	64.1162	-17.863	-11.0652	42.4695	-11.4374	-62.2312	4.13086	10.4246	61.3704	39.9462	-47.821	-6.89343	-22.1997	85.9299	-12.4595	-13.5074	5.93176	-23.2865	5.65112	-35.693	20.8344	9.34534	3.1377	-0.557983	24.5247	35.1288	5.25183	-5.58044	34.5477	22.0942	10.5425	-26.3838	-25.3915	8.45483	17.6494	-33.5048	64.573
53.0463	-7.18054	-46.6644	14.7882	-1.34412	10.0269	-4.96753	33.9567	20.7172	13.8542	-15.2535	21.751	64.0382	-17.8583	-11.4619	42.9125	-10.7112	-62.1237	4.46973	10.0149	62.0317	39.2131	-48.8619	-7.63416	-23.5323	86.2407	-11.438	-13.4043	5.70605	-23.6532	5.97644	-35.4972	21.3151	9.25391	4.00146	-0.277832	25.1963	34.8925	5.28101	-5.14001	35.2557	22.1753	10.9406	-26.7714	-26.3547	8.84607	17.6838	-33.6204	64.8093
52.9692	-7.18542	-47.4181	15.2479	-0.77002	10.0052	-5.74243	34.2466	21.4794	13.5513	-15.5996	22.4871	63.3307	-17.8643	-11.751	43.1621	-10.2827	-61.959	4.97949	8.33667	62.3279	37.9935	-49.6318	-8.36157	-24.2085	86.5232	-10.6829	-13.4991	5.11414	-24.3004	6.40942	-34.5077	21.4548	9.12158	4.85938	-0.00439453	25.5885	35.1506	5.25415	-4.77173	35.7871	22.3158	11.1239	-26.4296	-26.8538	9.23035	17.755	-33.7246	65.9594
52.713	-7.1449	-48.2887	15.6991	-0.703003	10.0631	-6.24243	34.7114	22.3729	13.2928	-16.7557	22.6084	62.9426	-17.8726	-11.9833	43.7977	-9.67944	-61.6768	5.70129	7.81812	63.7228	36.8761	-51.0704	-8.71167	-25.3662	86.7114	-10.6498	-13.6238	5.3656	-24.4564	6.80273	-33.7522	21.707	9.30591	6.20496	0.502686	26.109	35.3336	5.26965	-4.62646	36.4762	22.5504	11.1375	-26.8575	-27.5858	9.21338	17.821	-33.6499	66.4
52.1824	-7.13794	-49.0243	15.8712	0.81311	10.0323	-6.52637	35.3387	22.86	13.2914	-16.9343	22.7627	62.3912	-17.8612	-12.1505	44.623	-9.13782	-61.1594	6.0426	8.29834	64.4424	36.0144	-51.6128	-9.39636	-25.8524	86.5187	-10.681	-13.6456	5.39526	-24.1316	7.30054	-33.2375	21.9633	9.61121	6.4679	0.780273	26.7285	35.2367	5.20532	-4.2876	37.0226	22.5955	11.1383	-27.6202	-27.8719	9.12781	17.6342	-33.453	66.8542
51.5071	-7.14453	-48.9644	15.738	2.18958	9.59509	-7.24524	35.6326	23.4894	13.4596	-17.396	23.2592	62.3883	-17.8657	-12.3934	45.0854	-8.98499	-61.1594	6.43835	7.98608	65.5142	35.3601	-52.0837	-10.1493	-26.1642	86.6195	-10.7992	-13.8	5.20288	-23.7159	7.8783	-30.6595	22.5133	10.4829	7.03308	1.03259	27.3451	35.1561	5.29822	-4.24011	37.1746	22.806	11.2361	-28.4215	-28.4412	9.15308	17.6482	-33.3219	67.6697
51.7432	-7.13928	-49.2402	15.6302	3.16797	9.38367	-7.71179	35.9414	24.6727	13.5243	-18.3867	23.7799	62.5011	-17.8872	-12.5054	45.9326	-8.47058	-61.7671	6.52588	7.22681	66.2909	34.892	-53.1185	-10.8523	-27.5165	86.5295	-10.8915	-13.6254	5.01294	-23.6086	8.75549	-29.9523	23.0146	11.3441	7.45776	1.04065	27.6586	35.2451	5.30017	-4.46399	37.089	23.0052	11.2134	-28.9888	-28.8466	8.97253	17.1326	-32.2183	67.9962
52.181	-7.15173	-49.6885	15.4005	4.00842	8.86877	-7.98438	36.627	25.0542	13.6746	-18.9424	23.8102	62.46	-17.9039	-12.8745	47.0068	-8.01941	-62.0964	6.66614	6.52356	67.0237	34.4362	-53.7843	-11.6989	-29.2908	86.7937	-11.0242	-13.455	4.48694	-23.5448	9.18811	-29.2578	23.0419	12.2927	8.24573	1.20312	27.4143	35.1238	5.28613	-5.0918	37.0978	23.0358	10.9882	-27.4542	-29.2241	8.66772	16.4845	-30.5396	68.0612
52.3625	-7.14465	-49.8613	15.2505	4.55383	8.53174	-7.54724	37.2461	25.1633	13.6143	-19.2795	24.3053	62.11	-17.85	-13.235	48.0027	-7.91089	-63.3263	6.82324	5.76575	67.9286	34.8988	-54.6654	-11.7797	-29.7399	87.3285	-10.9956	-12.6893	4.11255	-23.5972	9.49121	-28.812	22.9396	13.1428	9.0769	1.22827	27.3212	35.1189	5.26013	-5.4812	36.8693	23.0009	10.6132	-24.927	-30.2906	8.48291	15.8062	-29.7673	68.2471
52.3419	-7.14819	-50.0145	15.1029	5.04309	8.35303	-8.16516	38.1578	26.1765	13.4845	-19.9022	24.5571	62.1117	-17.8342	-13.6672	49.1093	-8.05005	-64.4077	7.02332	5.08704	68.6477	35.1677	-55.6017	-12.0873	-29.9546	87.6378	-10.5359	-12.2069	4.06128	-23.7064	9.97412	-27.95	22.8594	13.5334	9.32056	1.10327	27.6381	35.0488	4.9231	-5.63477	37.0386	23.0984	10.3259	-24.2419	-31.4679	8.26636	14.8799	-29.2531	68.5195
52.3398	-7.16174	-50.0558	15.1989	4.91138	8.5459	-9.01721	38.774	26.8623	13.3212	-20.309	24.657	61.9558	-17.8378	-14.1998	50.4026	-8.15173	-66.7871	7.01367	5.13721	69.428	35.4336	-56.051	-12.2646	-30.7939	88.6414	-9.37683	-11.6028	3.83582	-23.8285	10.7505	-27.1461	22.8375	14.4813	9.51001	1.04602	27.5281	35.338	4.12402	-5.27429	37.2306	23.2764	9.96729	-23.1925	-31.9722	7.93225	14.5739	-28.91	68.7035
52.072	-7.04797	-49.9658	15.2218	4.89258	8.55457	-9.72119	39.4143	28.2113	13.1989	-20.5237	24.6929	61.5881	-17.8489	-14.3411	51.8894	-8.60986	-67.7471	7.11279	5.34924	70.3647	35.6348	-56.4579	-12.55	-33.601	89.1747	-8.32605	-11.4481	4.10291	-24.1925	11.4941	-26.5219	23.1908	14.8488	10.7372	1.17847	27.0796	35.5712	4.0116	-5.37659	37.0376	23.756	9.82056	-22.5817	-32.5476	7.76404	14.2767	-28.5549	68.7915
51.9341	-6.74194	-49.8812	15.7728	4.36609	8.59045	-10.2874	40.0723	28.8727	13.2107	-20.7039	24.858	61.0093	-17.851	-13.8773	52.6737	-9.08435	-68.5469	7.24011	5.49255	70.5176	35.5309	-58.5193	-12.6154	-34.7567	90.5184	-7.51807	-10.1863	3.84009	-24.4956	11.7601	-26.233	23.5664	15.7966	11.3115	1.08228	27.672	35.8373	4.3822	-5.39856	36.7971	24.2589	9.54102	-22.3007	-32.1333	8.05835	13.3384	-28.2091	68.9865
51.6469	-6.10034	-49.7959	16.6649	3.92969	8.44885	-10.5023	41.01	29.3491	13.8822	-20.7606	24.8865	60.1003	-17.8292	-14.0377	53.7662	-9.41418	-69.3766	7.04236	5.2937	71.0833	35.7295	-59.6526	-12.7438	-35.1169	91.0573	-6.26038	-9.84937	3.68091	-25.0144	11.9937	-25.944	23.6916	16.1464	12.4275	0.789551	28.209	36.187	4.76086	-5.24646	37.0076	24.9598	9.69421	-21.8665	-31.2686	7.94031	11.9674	-27.9956	69.4594
51.1306	-5.36548	-49.7612	17.0641	3.3772	8.4021	-10.6792	41.6443	29.6549	14.8672	-20.7421	25.0463	59.4553	-17.8562	-13.5273	54.9558	-9.90601	-70.686	7.0094	5.24634	72.2037	36.2327	-60.3522	-12.7124	-35.3672	91.3458	-5.08032	-9.83667	3.34753	-25.3251	12.3124	-25.4972	23.6952	17.2728	13.151	0.75061	28.7843	36.4166	4.58032	-5.17798	36.8993	25.7041	10.3894	-21.5497	-30.8204	7.76733	11.2076	-27.894	69.8431
50.5382	-4.88953	-49.6002	17.877	2.87451	8.52393	-11.2092	42.2786	30.2228	15.6052	-20.8384	25.484	58.5945	-17.839	-12.4312	56.161	-10.0985	-71.8657	7.00122	5.42004	73.3791	37.2877	-60.8173	-12.4167	-36.2446	91.9119	-4.41211	-9.77234	3.16357	-25.96	12.8865	-24.9095	23.5868	17.8494	14.3566	0.97168	29.1506	36.806	4.05127	-4.6416	36.7961	26.0935	10.8218	-21.6903	-30.9702	7.42798	10.5588	-27.7308	70.5496
50.2175	-4.20435	-49.1674	18.2238	2.49524	8.68872	-11.998	42.9365	30.9674	16.3932	-20.99	25.9502	57.9329	-17.8434	-11.7659	57.3064	-10.256	-72.5475	7.05273	5.58594	75.0884	38.3002	-62.0372	-12.1965	-37.3856	92.6007	-3.37805	-9.85767	3.04138	-26.2585	13.3107	-24.6443	23.5225	19.024	14.9401	1.20654	29.166	36.9727	3.35144	-4.06409	36.4257	26.365	11.161	-22.224	-30.5897	6.72473	9.8999	-27.7085	71.3843
49.8918	-3.23975	-48.4202	19.1932	2.08423	8.79285	-13.0769	43.3842	31.3077	16.8175	-21.3142	26.3835	57.3635	-17.7668	-11.042	57.423	-10.1697	-73.0994	7.14319	6.68994	76.1484	38.8574	-62.8342	-11.8503	-38.068	93.0315	-3.07031	-9.88354	2.82959	-26.837	13.5291	-24.6281	23.467	20.2852	15.5754	1.35852	29.5271	37.0846	2.79944	-4.0498	35.9065	26.5448	11.6097	-21.8422	-30.9811	6.44104	8.73022	-27.7378	71.9784
49.7811	-3.1897	-46.8969	20.6171	1.66943	9.19238	-13.4089	44.141	31.5344	17.0808	-21.6573	27.0986	56.8866	-17.699	-10.8395	57.9449	-9.84167	-73.8005	7.11572	7.92383	77.3616	39.6813	-63.8369	-11.1925	-38.8093	93.3826	-1.85046	-9.98511	2.58264	-27.8856	13.4424	-24.3364	23.182	21.2102	16.6244	1.54858	29.9948	36.9324	2.83777	-3.99475	35.1207	26.7137	12.5848	-21.697	-30.5273	5.58801	7.99585	-27.621	72.5973
49.4703	-2.92578	-46.3199	21.5514	1.7135	9.18677	-13.7885	44.9889	31.965	17.3921	-22.1508	27.463	56.9137	-17.2528	-10.7596	59.7006	-9.60522	-74.3859	7.07983	8.47095	78.316	41.1581	-65.5975	-11.0713	-39.2242	94.0306	-0.517578	-10.0905	1.9856	-28.7114	13.371	-24.1371	23.0073	21.9862	17.5647	1.8197	30.5693	36.9675	2.70251	-3.40796	33.9421	27.0436	13.5221	-21.1846	-30.8882	5.39868	6.83337	-27.3914	73.9133
49.1156	-2.34009	-45.9022	21.954	1.88367	9.22742	-14.0455	46.0594	32.2871	18.0923	-22.6624	27.6908	56.5414	-16.2557	-10.9136	60.8582	-9.21387	-75.4341	6.99841	8.91638	79.007	41.8497	-66.2499	-11.0958	-39.8181	95.0083	0.603271	-10.093	1.29419	-29.2496	13.2844	-24.1039	22.8342	22.4719	17.5879	1.96106	31.1414	36.6365	2.60596	-2.51001	32.5765	27.7413	13.5015	-19.1152	-31.8055	5.25745	5.69617	-27.3192	74.6836
48.1965	-1.86865	-45.2192	22.0929	2.38635	9.20959	-13.8873	46.6475	32.3939	18.5803	-23.1215	27.9105	55.9808	-16.1733	-10.9552	61.4236	-8.98413	-76.4158	6.5061	8.72839	80.7294	42.8438	-67.3126	-11.3707	-40.769	96.8064	1.47534	-10.923	1.19702	-29.4852	13.438	-24.0062	22.7926	23.397	17.9709	2.48792	31.2589	36.1528	2.71338	-0.963745	32.1528	28.1003	13.2919	-18.4432	-32.045	5.74548	4.83667	-27.6138	76.7264
47.2744	-1.60291	-44.7656	22.9968	2.89819	9.45935	-13.9106	47.9301	32.3879	18.717	-23.5676	28.1179	55.8497	-14.9894	-11.0394	61.4884	-8.68408	-76.8177	6.13867	9.06323	82.1024	44.339	-69.2786	-11.371	-41.1578	97.6049	1.7019	-11.9847	0.75354	-29.8328	13.4558	-23.8258	23.1873	24.4275	18.1868	2.93176	31.6959	35.4635	2.72131	-0.87854	31.7772	28.4962	13.0236	-18.0394	-32.8892	5.78918	4.34277	-27.5294	77.8258
46.6158	0.0806885	-44.3447	24.4786	3.4054	9.6637	-14.2798	48.866	32.474	18.5289	-24.8363	28.2129	55.5809	-13.4406	-11.1439	61.5803	-8.16931	-77.4806	6.28052	9.35938	82.676	45.189	-70.3146	-11.4641	-41.9557	98.3439	2.54761	-12.108	0.837891	-30.0521	13.5201	-23.5199	23.27	25.7545	18.4767	3.12634	32.1389	35.3289	2.47656	-0.877686	29.7305	29.4995	12.7714	-17.7345	-33.13	5.93835	3.83936	-27.8306	78.6073
46.556	1.85205	-43.8687	25.118	3.96143	9.92273	-14.5359	49.5378	32.6577	18.3906	-25.5127	28.101	55.3423	-12.301	-11.0562	61.5458	-7.69202	-78.3132	6.39404	9.59705	82.8456	45.9421	-70.4805	-11.235	-41.6669	99.2319	3.0863	-12.5081	1.6665	-30.4098	13.6696	-22.9017	23.9899	26.2449	18.6293	3.8739	32.342	34.9578	2.16321	-0.970947	27.8207	30.4452	12.6971	-17.9224	-33.5901	6.7511	2.99939	-27.5969	79.1683
46.3792	2.48218	-43.3887	25.3407	4.89709	9.73608	-14.3397	50.6989	32.9479	18.2627	-25.8716	28.0676	55.28	-11.2867	-10.9648	62.149	-7.6095	-78.4685	6.71545	9.67017	83.6621	46.4078	-71.8077	-11.2551	-41.3136	99.8428	3.92212	-12.6083	2.19556	-30.875	13.618	-22.4871	23.8333	27.4171	18.5287	4.53467	32.6324	34.089	1.93457	-0.565186	26.8	31.2991	12.7904	-18.1385	-34.2216	7.2915	2.04248	-27.0715	79.7688
46.5115	2.85498	-43.0048	25.5219	5.43372	9.73438	-13.9812	51.4011	33.4624	18.1461	-26.5828	28.114	55.475	-10.4738	-10.6903	61.8811	-7.48059	-78.8925	6.95557	9.78247	83.9586	47.1368	-73.3527	-11.5018	-41.3262	101.053	5.47412	-13.2903	3.87036	-31.4933	13.5621	-22.3756	24.1987	28.0974	18.6488	5.24792	33.0895	33.3287	1.59265	-0.036499	26.408	32.1941	12.8046	-18.0732	-34.6526	7.91577	1.27832	-26.6256	80.7358
46.6681	4.21912	-42.495	25.7883	5.84595	10.0088	-13.8406	52.9198	34.1051	17.9834	-27.1348	28.2362	55.7677	-9.84802	-10.7599	61.7747	-7.34326	-79.8422	6.97668	9.23132	84.6139	47.4705	-74.2679	-11.6035	-41.0023	101.895	6.28052	-13.6293	4.28723	-32.3495	13.3671	-22.1108	24.5479	29.3376	18.5603	5.83032	33.3264	33.1965	1.35693	1.04138	25.8839	32.9579	13.0082	-18.2827	-34.9966	8.32092	0.792236	-27.0994	81.3112
46.7609	5.84045	-42.439	26.2697	6.59363	10.2035	-13.6305	53.83	35.2859	17.7991	-27.5543	28.5012	56.0488	-9.53259	-10.7625	61.9286	-7.24268	-80.1851	7.19543	8.95984	84.2883	48.0309	-75.0813	-11.7021	-40.712	102.402	6.93518	-13.4304	5.16809	-33.1012	13.1411	-21.5929	25.0176	30.1456	18.489	6.50818	33.7454	32.9191	0.861694	1.60437	25.2273	34.1177	12.9312	-18.4695	-35.4955	8.05396	-0.258667	-27.5176	80.8917
46.4119	6.8374	-42.1731	26.735	7.04187	10.3555	-13.4263	54.1533	36.2017	17.5376	-27.8398	28.524	56.1492	-9.12378	-10.7107	62.1068	-7.78418	-80.4735	7.21448	8.18372	82.6113	48.1736	-75.4904	-12.2155	-40.8003	102.849	8.00269	-13.0657	5.48096	-34.1426	13.0897	-19.8862	25.4971	31.2571	18.4658	7.07336	34.1006	32.458	0.564697	2.0376	24.8173	34.4083	13.1479	-18.9167	-35.7194	8.13623	-0.587524	-27.439	80.5419
46.4608	7.06128	-41.9807	27.0032	7.21741	9.96069	-13.2097	54.8057	36.8469	17.5012	-29.3159	28.5555	56.426	-8.93445	-10.6807	62.1173	-7.552	-80.1013	6.85535	7.45532	81.6016	48.1897	-76.3383	-12.2777	-40.4966	102.854	9.46777	-12.4806	5.70642	-35.1993	13.3328	-19.4611	26.5259	32.4338	17.0322	7.81384	34.4791	31.7358	0.0844727	2.60376	24.2224	35.325	13.6528	-19.1998	-36.8522	8.56409	-1.25879	-27.1487	81.103
46.8156	7.93713	-41.7305	27.1171	7.25391	9.74988	-13.2684	55.3838	37.7795	17.5006	-30.3289	28.6013	56.7092	-8.46497	-10.447	62.2727	-7.93677	-80.0424	6.38525	6.82471	79.8676	48.1315	-77.4055	-12.8192	-39.6433	102.525	9.95666	-11.6141	5.71326	-36.1996	13.4883	-18.7056	26.7545	33.375	15.7994	8.23254	34.5381	31.2775	-0.050415	4.07178	22.7841	37.3815	13.871	-19.3378	-36.8828	8.97424	-1.70679	-26.8831	81.0906
47.0042	9.49988	-41.2593	27.4167	7.28662	9.75525	-13.452	56.2191	38.1016	17.4071	-31.6211	28.7031	57.1482	-8.33728	-10.3087	62.7324	-8.41223	-80.0951	6.1947	6.81934	77.8138	47.9369	-78.7797	-13.4873	-39.1187	102.252	10.8018	-11.3466	5.72888	-37.611	13.9521	-18.2822	27.1891	34.7008	15.1136	8.49207	34.254	30.6957	-0.82312	4.89868	21.3893	38.6172	13.8123	-19.4449	-37.0057	9.18457	-0.976929	-26.8334	80.7894
46.4966	10.3223	-41.0066	28.2606	7.19067	9.62109	-13.635	56.9023	37.7404	17.2487	-32.3101	28.7806	58.2137	-8.34534	-10.0969	63.2623	-8.01196	-79.3063	5.14087	7.01538	76.5115	47.8704	-79.4717	-13.6975	-38.4873	102.24	11.7324	-13.1266	5.73376	-38.933	15.0977	-17.9304	27.899	36.109	14.7874	9.08655	33.3337	30.1897	-1.53125	4.4812	19.8048	39.3485	14.0718	-19.255	-37.5405	9.06641	-0.402588	-26.899	79.8741
45.7164	11.5312	-40.7457	29.3262	6.92639	9.85144	-13.5988	57.3853	37.3799	17.0128	-33.1713	29.0916	59.1566	-8.33289	-9.81238	63.8461	-7.65137	-78.6681	4.69861	7.0769	75.3761	47.8313	-80.5723	-14.1914	-38.4315	101.74	12.3685	-14.5651	5.63843	-40.1892	16.1719	-17.4429	28.2944	37.2974	14.2788	9.3739	32.3578	29.3688	-1.64661	4.23877	18.8188	39.9808	14.5857	-19.0492	-37.9762	9.45728	-0.0098877	-26.666	79.0344
44.8126	12.2079	-40.7871	29.833	6.83984	9.49634	-13.5747	57.9451	37.0792	16.8114	-33.7831	29.3523	59.7877	-8.15723	-9.31274	64.6895	-7.16003	-77.1294	3.80591	7.14294	73.5737	47.7397	-82.736	-14.5242	-38.2278	101.266	13.0364	-16.0536	5.63464	-41.6223	17.5115	-16.9056	28.3365	37.9551	13.6143	9.97791	32.1862	28.6191	-1.7981	3.42468	17.7871	40.4646	15.0114	-18.8069	-38.1447	10.696	0.572266	-26.1967	77.6589
44.9231	13.6156	-40.726	30.4934	6.76648	9.20325	-14.0121	58.7903	36.3546	17.0078	-34.153	29.4408	60.171	-8.06824	-9.22693	65.3589	-6.44519	-75.4033	3.49817	7.2533	72.1825	47.6012	-84.0566	-14.3334	-38.142	100.96	13.5472	-16.6052	5.65967	-42.2354	17.7112	-16.3195	28.9954	40.0005	12.774	10.3084	31.8644	28.3137	-1.84106	2.47034	17.1952	41.7694	16.1967	-18.4385	-38.8987	11.7323	2.91382	-25.6151	76.7231
44.9459	14.5742	-40.5775	31.1997	6.52747	8.99963	-14.394	59.2415	35.7891	17.0566	-34.882	29.2325	60.7274	-8.21887	-9.14099	66.5992	-5.96448	-74.813	3.21729	7.59253	71.3821	47.3059	-84.5226	-14.2094	-37.8824	99.6556	14.1151	-17.9877	5.64429	-41.0853	17.374	-15.7366	29.7869	41.0776	11.994	10.7634	32.103	27.9271	-1.7821	1.94043	16.5493	42.4829	16.71	-17.8403	-39.6986	12.7896	3.22437	-24.8854	75.6929
45.1565	15.1431	-40.5332	31.113	6.22192	8.80579	-14.7649	59.6628	35.4889	17.4684	-35.9564	28.9659	61.501	-8.46692	-8.75977	67.9623	-5.81677	-74.2866	2.55164	8.10632	70.3688	46.7466	-84.902	-13.8107	-38.0291	98.6896	14.3713	-19.8052	5.62109	-39.5209	17.3909	-14.8142	30.3918	42.1089	11.4702	11.1222	34.5011	28.3945	-1.81836	0.535645	16.4006	43.2969	17.51	-17.817	-40.2208	14.3651	3.47852	-24.6616	74.8809
45.1129	15.4019	-40.7206	30.3977	5.80786	8.22546	-15.3588	59.8143	35.3101	17.7388	-36.8917	28.7708	62.6605	-8.56335	-8.10596	68.6396	-6.10718	-73.3127	2.00452	8.64307	69.8528	46.2944	-86.5101	-13.442	-37.9327	97.5844	14.5675	-21.2001	5.58484	-37.454	17.2722	-14.3035	30.6588	42.8347	11.7144	11.6879	35.7925	28.5585	-1.86218	-0.441162	16.6144	44.0894	17.9332	-18.5544	-40.6306	16.0651	3.72192	-24.5751	74.0743
44.7906	15.908	-40.8864	27.746	5.6991	8.14185	-15.515	59.7484	35.1757	17.9298	-37.4067	28.979	64.1553	-8.29395	-7.58508	70.1771	-6.52979	-72.3719	1.51758	9.45349	69.1068	45.8971	-87.9354	-13.6654	-37.6161	96.4816	15.8665	-21.9517	5.66858	-36.0604	17.2854	-13.2777	31.1946	44.2526	11.9969	12.2819	36.5647	28.2748	-2.17053	-0.489746	17.0249	44.2845	18.1831	-18.5685	-41.2704	16.9749	3.80078	-24.7419	73.678
43.8862	16.5413	-41.5856	26.9595	5.62939	7.87744	-16.068	59.728	35.03	17.8617	-37.8716	29.4108	64.5757	-7.94714	-6.81641	71.0967	-6.58887	-71.9359	1.87244	9.5271	68.2325	45.1327	-88.4384	-14.1238	-37.2042	96.1501	16.1959	-23.1652	5.69214	-35.3551	17.3428	-12.5989	32.0978	45.2255	12.0016	12.6566	38.6503	28.0736	-2.89575	-0.623047	18.4603	45.1696	18.3947	-18.3209	-42.5187	17.6819	3.72192	-23.6373	73.8917
42.9863	16.8942	-42.0375	25.8976	6.11011	7.89709	-16.3253	59.7473	34.4817	17.9052	-38.1459	30.3164	65.4438	-8.08374	-6.59216	72.4697	-6.04053	-70.4722	2.23145	9.17407	67.7319	44.729	-88.6388	-15.0316	-36.8577	94.9656	16.4559	-24.1069	5.57874	-35.0729	17.2483	-11.7196	32.4583	45.8644	12.1678	12.9656	38.8904	28.4045	-3.25183	-0.377808	19.6719	46.0221	18.4895	-18.2589	-44.8182	18.8306	3.60254	-22.3943	73.9551
42.27	17.1641	-42.686	25.2596	6.698	7.8717	-16.626	59.7466	33.8387	18.0481	-38.6421	31.0178	66.1353	-7.5769	-6.02991	73.6202	-5.54688	-69.5125	2.65002	8.9425	68.2015	44.4044	-89.0253	-16.051	-36.5347	93.5763	17.3982	-24.4785	5.5199	-34.3458	17.0282	-11.0555	33.3069	46.348	12.465	13.4915	39.1687	28.4481	-3.50342	-0.143066	20.9674	46.436	18.8374	-18.5426	-45.5957	19.696	3.10522	-20.7263	73.964
42.1726	17.5636	-43.4456	24.524	7.43005	7.72034	-16.7235	59.7383	33.4796	18.0541	-38.8514	31.2491	66.8317	-7.17029	-5.50024	74.7522	-5.29504	-68.8798	2.64392	9.06311	68.3754	44.1506	-89.7762	-17.2341	-35.942	92.5092	18.5151	-25.1252	5.55396	-32.8414	16.854	-9.35388	33.3549	47.2158	12.546	13.9395	39.7217	28.4761	-4.30054	-0.0991211	22.0485	46.87	19.5469	-18.042	-46.9729	20.5076	3.5603	-20.0675	73.7529
41.9921	17.9176	-43.8293	23.9041	8.61975	7.94946	-16.6025	59.6034	33.3064	18.0773	-39.2134	31.3137	67.715	-6.15356	-5.36182	76.6351	-5.04285	-68.4325	2.94702	9.26831	68.7025	43.9271	-90.733	-17.3619	-34.1635	91.6582	18.8142	-25.4802	5.59241	-31.5796	16.694	-7.39966	33.6187	48.2548	12.8483	14.2253	40.4039	28.7117	-4.70398	-0.272949	22.7457	47.2421	19.8732	-18.1899	-48.0306	21.358	3.3811	-19.8242	73.957
41.5934	18.0585	-44.4225	22.8961	9.41931	8.19299	-16.3348	58.9933	33.5133	18.127	-40.1547	31.2041	68.4203	-4.8175	-5.26086	77.7013	-5.04236	-67.1644	3.08191	9.1604	68.6154	43.766	-91.5905	-17.0774	-32.7279	90.6595	18.7668	-26.1458	5.81702	-31.8009	16.5101	-6.97449	33.9065	49.6113	13.5702	14.3408	40.3159	28.4393	-4.9436	-0.411377	23.5278	48.1599	20.5187	-17.7905	-49.3007	22.4565	2.64465	-18.9083	73.8033
41.4576	18.0851	-44.7423	22.2081	9.75806	8.64404	-15.77	58.3201	33.8715	18.1523	-40.3864	31.1056	69.1538	-4.73462	-5.07446	78.202	-5.02136	-65.8634	3.099	9.37439	68.147	43.1782	-92.1891	-16.5348	-32.558	90.2043	19.0631	-26.9642	6.06714	-31.7744	16.261	-6.43726	33.9502	49.7574	14.2509	14.3287	39.7131	28.4021	-5.36755	-0.67627	24.2365	48.375	20.7694	-17.299	-50.4052	24.5139	3.02173	-18.5171	73.6594
41.597	18.3066	-44.8367	21.3308	10.0985	9.02881	-15.8943	57.8713	34.1517	18.3373	-40.6924	31.3142	69.8984	-4.39441	-4.88037	78.6921	-5.06641	-65.7361	2.95288	10.2139	67.5166	42.8065	-93.2479	-16.6808	-32.4077	89.0945	19.2678	-27.7513	6.18457	-31.4698	16.2222	-5.42651	34.0759	50.2253	14.9581	13.9252	40.0198	28.3667	-5.61914	-0.933838	24.8259	49.4403	21.2927	-16.7943	-50.6801	25.3044	4.16321	-18.7493	73.7659
41.9176	18.6036	-44.8608	20.6801	10.3275	9.01562	-15.8884	57.4241	34.78	18.4359	-40.7078	31.4615	70.547	-3.0415	-4.75842	79.3905	-4.91162	-65.5289	3.55066	10.7831	67.1522	42.5057	-93.8444	-17.285	-32.1044	88.2405	19.1744	-28.2659	6.76111	-31.1512	15.8223	-4.27148	34.2445	51.1006	15.3965	13.403	40.8438	28.1531	-5.60022	-0.670532	24.8959	51.4982	21.6675	-16.0439	-50.3336	26.5148	4.87244	-18.8812	73.0856
42.3165	18.9503	-44.9285	20.821	9.58679	9.15442	-16.1768	56.9723	35.2882	18.561	-40.694	32.1171	71.1948	-1.76843	-4.40173	79.707	-4.83081	-65.6793	4.40295	11.2262	66.3464	42.1114	-94.3783	-17.2161	-31.5751	87.4562	19.3114	-28.2643	7.41663	-31.198	16.0704	-3.29785	34.4027	51.7046	16.0303	12.964	42.4884	29.0388	-5.27173	-0.468506	24.8081	51.6349	21.6826	-15.0382	-50.2852	27.8142	5.05188	-19.2728	72.2467
42.894	19.6993	-45.1699	21.0741	8.6958	9.33386	-16.8142	56.3722	36.4335	18.6143	-40.1481	32.9613	71.7638	-1.10388	-4.10315	79.6974	-4.26196	-65.8767	5.1062	12.5685	64.4165	41.6104	-95.4379	-16.5579	-31.4482	86.0742	19.0862	-28.1256	7.97217	-31.1654	15.7263	-2.98975	34.6185	52.9609	16.0547	12.5831	43.3203	29.1565	-5.08691	-0.596558	24.734	52.7496	22.4053	-14.725	-51.2786	28.9677	5.50098	-19.3052	71.5859
43.3096	19.8817	-45.3647	21.2144	8.07532	9.38135	-16.703	55.6295	37.7335	18.8882	-39.4835	33.8112	72.2406	-0.245972	-3.83179	79.6501	-3.45667	-65.9418	5.6449	12.6249	62.9908	41.1823	-95.8612	-16.1768	-31.4403	85.3885	19.0303	-28.0927	8.46094	-31.3203	15.3833	-2.72131	34.9719	53.7427	15.6796	12.3748	45.0039	29.0585	-4.82178	-0.928955	24.9026	54.2568	22.5736	-14.4229	-51.8436	28.9965	5.47485	-18.7122	70.8757
43.353	21.3091	-45.3191	21.2761	7.15088	9.41711	-17.1968	55.0944	38.7778	19.65	-37.9631	34.5375	73.1621	0.106445	-3.77319	79.5753	-2.67786	-66.2882	5.85583	13.8728	62.4996	40.8419	-95.9847	-15.7771	-31.3164	84.6115	18.9292	-28.0267	8.70996	-30.3018	15.0131	-2.41638	35.3118	53.9746	15.2765	12.2057	47.0648	28.5638	-4.59436	-0.852661	25.3435	55.4341	23.3896	-13.2695	-52.2689	30.3276	5.09875	-18.2344	70.453
43.2084	22.0657	-45.5468	21.4633	5.98315	9.4165	-17.7295	54.5352	39.6271	20.2594	-37.2999	34.933	74.1611	0.349487	-3.44421	79.3401	-1.96924	-66.4849	6.25122	15.0995	61.7169	40.6757	-95.7502	-15.257	-31.0317	84.5254	18.861	-27.7524	8.85645	-28.9844	14.7417	-1.88782	35.2354	54.1086	14.5325	11.7408	48.6913	27.743	-4.55676	-1.98975	25.9788	56.766	24.442	-12.274	-53.2491	31.9984	4.97327	-17.9457	70.2452
43.4451	23.749	-45.5902	21.5137	4.86462	9.48535	-18.4602	54.0437	41.1667	20.4435	-35.8512	35.3091	74.5464	1.02209	-2.92737	78.9211	-1.43066	-65.8616	6.81494	16.3901	60.9166	40.621	-95.2501	-14.8114	-31.0492	84.7013	18.7482	-27.2625	8.79761	-27.9334	14.63	-1.0614	35.0745	54.7097	14.3171	11.7312	49.6765	27.0212	-4.44446	-2.18372	27.6626	57.9829	25.6809	-11.9866	-54.373	33.2114	4.77063	-17.9983	70.6182
44.0804	24.8416	-45.6245	21.4644	4.28772	9.74597	-18.7605	53.4216	41.8093	20.9193	-35.408	35.9006	75.0389	1.18079	-2.53809	77.8217	-0.345337	-64.9735	7.41846	17.4509	60.4016	40.0262	-94.8495	-14.0839	-30.3635	84.9146	18.5052	-26.5286	8.95996	-27.1431	14.4766	-0.133667	35.0404	54.8583	14.0497	11.8926	49.9314	26.6375	-4.29553	-2.10413	28.678	58.1523	26.6194	-11.1345	-55.6841	34.2847	4.82471	-17.9695	72.0466
44.7469	25.2236	-45.6533	21.369	4.18689	10.119	-19.3989	52.5499	42.7556	21.1976	-34.9543	36.2411	75.3035	1.05212	-2.20703	76.9772	0.308594	-63.7603	7.86462	17.9106	59.8069	39.599	-94.2936	-13.6459	-29.4108	85.1799	18.2224	-25.9882	9.0304	-26.4205	14.4021	0.177368	35.1323	54.6888	13.9879	12.0157	51.2681	26.5105	-4.13477	-1.12805	29.8522	59.8521	26.9747	-9.77454	-57.2502	35.6936	5.0741	-17.9293	73.0388
44.5864	26.5463	-45.6449	21.3756	4.01477	9.91443	-19.8489	51.8812	43.8383	21.6111	-34.4312	36.194	75.4987	1.1095	-1.93506	76.4142	1.04089	-63.8842	8.64832	19.2856	59.507	39.1316	-93.594	-13.1188	-28.5222	85.6393	17.981	-25.4401	9.06494	-25.0308	14.1797	0.63562	34.9767	54.7662	13.9269	11.8823	53.0785	26.4559	-4.3374	-0.984863	31.6838	60.8975	27.4213	-8.89185	-58.2817	36.8602	5.23535	-17.7479	73.4341
43.9215	27.4366	-45.6685	21.0657	3.26221	9.44861	-20.797	51.5758	44.5891	22.1729	-33.9287	36.1799	75.7025	0.966187	-1.80322	74.8594	2.03027	-62.8899	9.18372	19.8994	59.1646	38.7578	-92.8661	-12.9467	-28.2184	86.5175	18.0758	-24.6754	9.18042	-23.04	13.756	1.38904	35.009	55.0983	13.9559	11.986	54.2349	26.1866	-4.26709	-1.12488	32.7147	62.3595	27.4235	-8.7782	-58.7102	37.7408	5.68115	-17.3149	73.6554
43.605	28.3074	-45.5797	20.3455	2.56543	9.09802	-21.3762	51.1302	44.676	22.351	-33.5403	36.0145	75.7347	0.542847	-1.578	73.4949	2.90894	-61.7063	10.5154	21.3892	59.0107	38.3721	-92.1611	-13.1177	-27.72	86.2468	18.1952	-24.303	9.23486	-21.8619	13.6261	2.30676	34.9019	55.9128	13.8958	12.2086	55.8325	26.342	-4.2854	-1.38721	33.4913	64.3701	28.1593	-7.9342	-59.6847	38.2379	5.96777	-18.8934	73.8136
43.4525	29.6058	-45.4583	20.5071	1.78857	9.16113	-22.1837	50.5188	44.379	22.5015	-33.3304	35.9769	75.5795	0.33667	-1.72937	72.1598	3.14246	-60.1903	11.6705	22.6108	59.0713	37.4429	-91.5431	-13.1866	-27.3335	85.8274	18.8765	-23.8358	9.41821	-20.9305	13.4713	4.06055	34.902	55.6661	13.8206	12.5638	57.4624	26.431	-4.27002	-1.4447	34.0073	64.5292	28.3419	-5.95349	-61.8914	38.9244	6.28247	-20.0024	73.8009
43.7582	30.448	-45.5088	19.8131	1.69751	8.99719	-22.3059	49.3752	43.9845	22.7067	-33.7233	35.7206	75.4153	0.157227	-2.15063	70.8353	3.1532	-58.8823	11.8831	22.788	59.3848	36.8693	-90.363	-13.0424	-27.3928	85.642	18.911	-23.7159	9.9375	-20.0137	13.462	4.82947	35.1044	55.295	13.7011	13.1019	59.1372	26.9053	-4.1637	-1.4762	35.324	65.1237	28.863	-5.14868	-62.1941	39.4938	7.15417	-20.7369	74.0776
44.0792	30.9187	-45.6132	19.2526	1.80591	8.97607	-23.2361	48.0782	42.9321	22.626	-33.9882	35.4382	75.297	0.088501	-2.16321	69.2662	3.33057	-58.0702	12.7589	23.8988	59.4938	36.2534	-89.6532	-13.0012	-27.3347	85.635	18.4955	-23.6637	10.1725	-19.1868	13.313	5.9718	35.1758	55.1315	12.8887	13.6957	59.1313	27.6355	-4.28711	-1.91943	36.5342	65.3494	29.6145	-4.40259	-63.2015	40.2161	8.14062	-21.4546	74.3839
44.2554	31.6355	-45.821	18.7469	1.9386	8.96753	-23.4431	47.6926	42.1021	22.4773	-34.6924	34.8325	74.9438	-0.0247803	-2.20142	67.6101	3.83899	-57.6353	14.3092	24.874	59.5085	35.661	-88.9163	-12.6915	-27.7678	85.4642	18.674	-23.5691	10.4524	-16.985	12.8618	7.06433	35.2766	54.8729	11.6979	14.8259	59.6671	26.9833	-4.61218	-3.63379	36.6128	65.5128	30.5366	-3.6228	-63.7499	41.255	9.43994	-21.9224	74.4773
45.1254	32.2911	-45.9686	18.1787	2.0459	9.01978	-23.9478	46.7008	41.9208	22.1135	-34.9126	34.4685	74.5979	0.220947	-2.19092	66.6798	4.46326	-56.9285	16.5198	26.0381	59.0419	35.1046	-88.2006	-12.9651	-28.5774	85.4989	18.9895	-23.428	10.9578	-16.0942	12.5217	7.82837	34.994	54.4382	10.8899	15.382	60.2761	27.0001	-5.03735	-3.31433	37.0278	65.6361	32.2095	-1.9917	-64.2544	41.6289	10.0713	-21.9543	74.8053
45.9725	33.0797	-45.9243	17.7742	2.03674	9.44995	-24.5206	46.3276	41.9308	21.5262	-35.032	34.1508	74.3599	0.398438	-2.36743	65.6255	4.58655	-56.4161	17.2667	26.6688	58.5338	34.8054	-87.7344	-13.4847	-29.3955	85.6533	19.391	-23.3302	11.2478	-14.6895	12.2332	8.09753	34.9801	54.0991	10.0121	15.5331	60.8678	27.0962	-6.15125	-3.70154	37.4546	66.696	32.6724	-0.946533	-64.6322	41.8536	11.1632	-22.5214	74.7223
46.9487	33.6224	-45.5005	17.0006	1.83447	9.94934	-24.818	45.5067	42.4143	20.7515	-36.0416	33.7948	74.3049	0.566284	-2.35388	64.5206	4.71582	-56.0033	17.8246	26.5259	57.8564	34.6075	-87.3315	-14.2538	-29.5133	85.8536	19.5385	-23.2308	11.9922	-13.6119	11.7288	8.12549	35.0281	53.8597	9.19666	15.1477	61.1083	26.9606	-6.9563	-4.01025	37.4419	67.9916	33.2147	-0.129517	-65.1011	42.2582	11.9839	-23.7748	75.2562
47.3059	33.9341	-45.304	16.0779	1.62842	10.2849	-25.198	44.5812	42.7996	20.3541	-36.3743	33.2321	74.2007	1.23755	-2.45349	64.1227	5.34888	-55.8818	18.0907	27.301	57.3328	34.6951	-86.7318	-14.8162	-29.3104	86.0552	19.7318	-22.9712	12.6228	-12.3296	11.1915	8.09924	35.1854	53.3113	7.88879	14.5712	61.5093	27.3005	-7.14978	-2.97437	37.4829	68.5907	32.9375	1.86389	-65.2517	42.7899	12.8474	-24.3903	75.4364
47.2856	33.988	-45.1442	15.6	1.16089	10.6094	-25.4757	44.4592	43.04	20.0666	-36.1417	32.0366	74.1431	1.83704	-2.427	63.3373	7.63831	-55.6925	19.7751	27.937	57.1691	34.672	-86.4274	-14.9789	-28.488	86.9114	19.7412	-22.7618	13.1351	-11.4021	10.9542	8.23267	35.2422	53.0361	6.65784	14.1846	62.0867	27.344	-7.23535	-2.74634	37.7247	69.2139	33.2225	2.98169	-65.0752	42.8978	14.5564	-24.8357	75.9569
47.2142	34.1761	-44.6577	15.2625	0.792725	10.9645	-25.5945	44.256	43.0161	19.9009	-35.4413	31.5404	74.1547	1.96948	-2.43677	62.1351	8.85291	-55.8134	20.4275	29.1624	57.5001	34.8121	-86.1879	-14.9987	-28.3046	87.1251	19.5642	-22.0782	13.4651	-9.98157	10.5864	8.70691	35.3258	52.6759	5.98083	13.8756	62.4159	27.4968	-7.66235	-2.479	37.6804	69.7931	33.55	3.73853	-64.9161	42.9602	15.2279	-25.5902	76.0991
47.1761	34.5718	-44.1249	14.859	0.363892	11.7301	-25.796	44.2003	43.1666	19.8438	-35.1656	30.9598	73.9827	2.21521	-2.44141	60.9717	9.17639	-55.2787	20.9993	30.7201	58.1964	34.9084	-85.9325	-14.963	-28.515	87.3635	19.5035	-21.286	13.2963	-9.30286	10.5325	9.38525	35.5203	52.688	5.38489	13.0582	62.7201	28.7404	-7.56641	-2.76917	37.7509	70.3303	33.8403	4.24341	-64.8322	42.7931	15.6692	-26.4993	76.9183
47.1676	34.7991	-43.6576	14.4336	-0.268921	12.5912	-25.8459	44.2408	43.3864	19.826	-35.0599	30.3684	73.9912	2.58435	-2.49744	59.4213	9.44043	-54.7476	22.0286	31.0792	58.4424	34.9752	-85.5941	-14.8467	-28.545	88.2356	19.0392	-21.5974	12.7974	-8.88989	10.5968	9.72913	35.8346	52.552	4.9812	11.7573	62.818	29.9464	-7.27563	-3.82263	38.0374	71.5067	34.7654	5.41687	-65.197	42.9427	17.186	-27.9082	77.7192
47.2136	34.9609	-43.2976	13.8478	-0.616699	13.2068	-25.9299	44.5132	44.0858	19.796	-35.0256	29.775	74.0675	2.64197	-2.53821	58.8065	10.4408	-54.7891	22.9266	31.5282	58.5127	35.0104	-85.0953	-14.8604	-28.8794	88.3097	18.6832	-20.8839	12.3536	-7.69482	10.3187	10.0597	36.1096	52.5995	3.78833	9.77246	62.8878	30.5702	-7.19067	-4.90686	38.4661	73.3274	35.6415	5.70825	-65.4502	43.1636	17.4476	-29.4076	78.0002
47.1759	35.1261	-43.0082	13.2743	-1.52625	13.8562	-26.1716	44.7548	44.9376	19.7655	-34.9304	29.3602	74.3644	2.6499	-2.37415	57.7627	11.2719	-54.4598	23.8665	31.9033	58.5448	34.9773	-84.5023	-15.1047	-28.2004	89.0588	18.2922	-20.5969	10.9922	-6.21289	10.1376	10.3315	36.3439	52.6055	2.57397	9.12891	62.1648	31.3044	-7.62634	-5.89661	38.5231	74.8655	35.9097	6.22278	-65.7109	43.3116	18.3618	-29.1964	78.4587
47.1787	35.234	-42.8115	13.4637	-2.56262	14.238	-26.2281	44.7531	45.5681	19.7227	-34.6791	29.4431	74.6965	2.47156	-2.63831	56.469	11.9425	-53.8035	24.3474	32.0883	58.4097	34.9764	-84.079	-15.2234	-27.2959	90.5994	18.2058	-20.0552	10.5344	-5.64343	10.0621	10.5989	36.6857	52.6202	1.84863	8.2561	61.7313	31.1731	-7.76526	-6.62134	38.4239	75.7361	37.2057	5.67236	-66.16	43.639	19.5446	-29.4204	78.6533
47.2291	35.2098	-42.4052	12.7522	-2.98547	14.5712	-26.2247	44.6815	46.5557	19.5867	-34.5325	29.0553	75.1287	2.22717	-3.03198	55.1772	12.2894	-53.2104	24.4178	32.2616	58.2883	35.0491	-83.8004	-16.35	-26.7394	91.0911	17.8901	-18.4231	10.2463	-5.34814	10.0323	10.5138	37.1046	52.7384	1.54028	7.79529	60.9697	30.5505	-7.89197	-7.02722	38.5646	76.531	37.2717	6.35144	-66.9017	44.0684	19.9851	-29.3905	78.645
47.2302	35.0353	-41.8447	12.043	-3.02502	14.9264	-26.1971	44.7395	47.0997	19.6781	-34.5023	28.3387	75.5804	1.60339	-3.5719	54.5029	12.5452	-53.3745	24.6371	32.3602	58.3906	35.0316	-83.1156	-17.5717	-27.3556	91.4224	17.6056	-18.1017	10.2408	-5.19519	10.0104	10.4683	37.5597	52.818	0.998047	7.54541	60.6838	30.6616	-8.37036	-8.25061	38.8497	77.8014	37.4119	6.51892	-67.6027	44.5751	21.2064	-29.3251	78.7781
47.257	34.7205	-41.4835	11.3221	-2.34705	15.4607	-26.1653	44.8196	48.0513	19.4497	-33.9933	27.5502	76.3322	1.2207	-3.93494	54.6798	12.6951	-53.415	24.8676	32.6653	58.6045	35.0918	-82.4612	-19.0608	-27.9507	92.0126	17.5321	-17.547	10.3254	-5.01489	9.83801	10.2484	37.6184	53.0646	0.521118	7.38696	60.3217	30.6418	-9.00806	-8.86475	38.9128	79.4462	37.5665	6.21082	-67.6931	45.2494	22.2324	-29.4146	78.7135
47.0901	34.4789	-41.5343	10.7018	-1.90332	15.9103	-25.9761	44.8165	48.9037	19.1757	-33.5651	27.0419	76.4673	1.1095	-4.44397	54.9873	13.275	-53.4935	24.8916	33.0999	58.5715	35.2047	-81.7029	-19.5382	-28.8051	92.3835	17.2681	-16.6973	10.027	-4.99829	9.54651	10.0374	37.7823	53.4683	-0.0303955	7.23743	59.5963	30.8148	-9.25562	-9.61182	39.0995	81.3511	38.1989	5.99695	-67.9463	46.0479	22.3182	-29.5532	78.4722
47.0298	34.1893	-41.9564	10.5087	-2.05774	16.5061	-25.474	44.7446	50.3008	18.7937	-32.8523	26.8684	76.7861	0.852417	-4.85132	55.9524	13.7516	-54.5964	24.3383	33.2805	58.5885	35.3036	-81.4115	-19.4021	-28.1467	93.0782	17.1521	-15.6553	10.2195	-5.10156	9.52539	10.0826	37.9344	53.9117	-0.603027	6.89905	58.8176	30.6333	-9.81238	-10.4177	38.7319	81.79	38.6298	6.05469	-68.3306	46.0002	22.6506	-29.4978	78.2517
47.2249	34.0481	-42.2794	10.3917	-2.36707	16.8899	-25.0983	44.6895	51.6805	18.3325	-31.6907	26.9683	76.9231	0.465088	-4.91785	57.0726	14.1952	-55.6611	24.0454	33.5669	58.9316	35.2637	-81.0461	-21.0573	-27.7097	93.9672	17.1582	-14.5253	10.6078	-5.3457	9.2627	10.1273	37.7882	54.7045	-1.21631	6.79614	58.2797	29.8665	-10.2573	-10.4103	38.9207	82.3268	39.0682	5.94543	-68.6659	45.808	23.4114	-29.1243	77.9419
47.3376	34.0653	-42.3824	10.0635	-2.75891	16.5533	-24.928	44.6266	52.5183	17.568	-30.2804	27.1481	77.1213	-0.0200195	-5.04492	58.3861	14.5586	-55.8933	23.6466	33.7588	59.7648	35.1814	-80.5302	-22.0421	-27.3417	94.642	17.2057	-14.446	10.7981	-5.84875	9.02844	10.2267	37.5919	55.4143	-1.8186	6.38684	57.4552	28.807	-10.5533	-11.0374	38.7012	83.3273	39.3665	5.75867	-68.6873	45.8176	24.4039	-29.4658	77.7062
47.1672	34.1667	-43.0916	9.56433	-3.32874	16.3916	-24.5797	44.5316	53.3157	16.9336	-29.7761	27.3469	76.8835	-0.340454	-5.24207	59.2164	15.0494	-56.9155	22.8962	33.3821	60.282	35.083	-80.5321	-23.1934	-27.1707	95.7584	17.2153	-13.9352	10.7179	-6.70703	8.77173	10.4476	37.4215	56.1039	-2.60205	6.2561	56.627	28.3132	-10.9471	-11.3162	38.6604	84.8077	39.3302	5.78809	-68.9281	45.9609	26.0999	-30.0054	77.4076
47.2332	34.2557	-44.2853	9.49915	-3.67346	16.2384	-23.8882	44.5115	53.949	16.2332	-29.4163	27.0551	76.9003	-1.10596	-5.44348	59.9021	15.631	-58.2958	22.3125	32.9812	61.8583	34.6625	-80.5	-23.8536	-26.6072	96.3518	17.2466	-13.4624	10.8986	-6.92896	8.79553	10.4175	37.2002	57.0906	-3.5072	6.2533	55.5745	28.3712	-11.1447	-11.2773	38.1753	86.5184	39.4424	5.91711	-69.4089	45.5146	27.0842	-32.2083	77.3348
47.1616	34.3662	-44.9727	10.0657	-4.84253	16.3615	-23.4093	43.708	54.7015	15.7142	-28.8358	27.3307	76.8341	-1.53113	-5.61755	62.3354	15.9077	-60.0761	21.3177	32.6663	63.7477	34.2158	-80.5674	-24.1251	-25.9492	97.1724	17.1901	-11.844	10.5488	-7.64355	8.6394	10.3287	36.993	58.5618	-4.05347	6.30823	55.1892	28.551	-11.6521	-11.2162	37.918	87.2122	39.7681	6.47729	-69.5437	45.6823	27.2294	-33.4989	77.2579
47.2228	34.4846	-46.8285	10.5647	-5.48267	16.6174	-22.8795	42.538	54.7065	15.5564	-27.7833	27.553	76.7914	-1.89001	-5.84351	63.6578	17.0743	-60.2637	20.6643	31.9617	64.8851	34.2645	-80.6986	-24.8414	-24.8973	97.979	17.2191	-10.5177	10.4364	-8.09314	8.3053	10.2878	36.5673	59.3413	-4.60596	6.45691	54.8379	28.8417	-11.9102	-11.8101	37.3737	87.4519	39.7256	6.86926	-70.0797	45.681	26.868	-34.0085	77.015
47.1677	34.5288	-47.3726	11.8945	-6.05725	16.2898	-22.9305	41.573	54.1261	15.2607	-26.6465	28.0388	76.5333	-2.5636	-5.82739	65.0569	17.713	-61.0984	20.4744	31.4207	66.0178	34.8015	-80.9617	-25.5969	-24.7086	99.0752	17.3593	-9.95593	10.3202	-8.52515	7.98071	10.1494	36.0946	59.7251	-5.31091	6.73987	54.6365	28.6104	-12.0436	-11.8701	35.6736	87.7039	39.7902	7.40356	-71.4645	45.4092	25.861	-34.7759	76.8423
47.3938	34.64	-47.9244	12.7998	-6.85132	15.8483	-23.0066	40.2936	54.609	14.4741	-24.8688	28.7711	76.4031	-3.28589	-5.54651	65.5278	18.4895	-63.0283	20.0825	30.5116	67.8274	35.4695	-80.9154	-26.1531	-24.5408	99.8577	17.5349	-9.53162	10.0646	-9.18823	8.05249	10.2347	35.9471	60.042	-5.63965	7.19275	54.8019	28.6234	-12.2604	-11.6829	35.2198	89.3665	40.0674	7.49133	-73.7217	45.3234	25.2653	-34.8965	76.4515
47.5742	34.8665	-48.4958	13.8514	-7.27893	15.0873	-23.2957	39.4539	54.8074	13.9429	-24.1266	29.7977	76.1438	-4.03235	-5.41565	66.0397	19.4404	-64.4542	19.8351	30.099	68.3651	35.9812	-81.3387	-26.7682	-24.1503	100.877	17.6943	-8.82349	10.1675	-9.40417	8.13672	10.1461	35.3265	60.2812	-5.94495	7.99829	55.4349	28.6179	-12.2338	-11.0132	34.2856	90.7081	40.5062	7.76782	-74.1951	44.5258	24.7885	-34.843	76.2856
47.731	35.2074	-48.6908	14.2529	-7.71753	14.2937	-23.5979	39.3441	54.7754	13.1562	-23.3312	30.912	75.7024	-4.76611	-5.53284	66.9526	20.3065	-65.0879	19.6761	29.5146	68.6228	36.1479	-81.3235	-27.6548	-23.7347	101.6	18.1265	-8.46057	10.2893	-9.29224	8.15735	10.1306	34.6791	59.6978	-6.07202	8.87317	55.9313	28.6956	-12.1776	-10.7145	33.4094	91.323	40.8994	7.80957	-75.5801	43.8083	24.8275	-34.6521	75.881
47.9119	35.3677	-49.9921	14.6283	-8.11328	13.3806	-23.7459	39.4026	55.1624	12.0588	-22.4886	32.2582	75.4768	-5.32678	-5.35095	67.4821	21.3804	-65.5062	19.3876	28.9966	68.8176	36.0422	-81.4962	-28.3427	-23.5352	102.156	18.2253	-7.60376	10.4346	-9.40173	8.19348	10.0497	34.9493	58.9297	-6.02539	9.99792	56.6207	28.8691	-12.0756	-10.075	33.287	91.9688	41.1481	7.72461	-77.2102	42.7717	24.9243	-34.3671	75.4291
47.9302	35.5818	-51.0035	15.2401	-9.40747	12.5105	-23.5109	39.3986	55.5538	11.1082	-22.0089	32.7411	75.2404	-5.90283	-4.86072	67.8064	22.0322	-66.349	19.2554	28.3767	68.9922	36.0615	-81.4963	-28.8527	-23.4926	102.945	18.2721	-6.28345	10.5659	-9.57373	8.37354	9.96204	35.319	58.4236	-5.96436	10.5018	57.5966	29.0907	-12.0781	-9.51111	33.5928	91.6641	41.339	7.80664	-78.2863	41.4636	24.8583	-34.2107	75.1405
47.9138	35.7589	-51.5369	15.9727	-10.2836	11.9894	-23.2397	38.9458	55.917	10.1476	-21.2288	33.6886	75.2144	-6.56079	-4.80432	68.1608	22.3066	-66.7987	18.8481	27.2896	68.8152	35.9886	-81.484	-29.566	-22.7324	104.292	18.2677	-6.29114	9.91443	-9.96631	8.82971	9.90735	35.3099	57.3112	-5.9314	11.061	57.8751	29.3358	-12.194	-9.46423	32.8435	91.778	41.9464	7.90369	-80.0145	40.4316	24.1449	-34.5304	74.9987
47.7747	36.0363	-51.7988	16.3279	-10.9169	11.5941	-22.629	38.4066	56.1307	8.81677	-20.1815	34.1931	75.0476	-7.68591	-4.50562	68.7008	22.2188	-67.4987	18.567	26.7234	68.4669	36.0565	-81.5377	-30.1577	-22.415	105.466	18.2373	-6.10425	9.09229	-10.1663	9.21448	9.70227	35.3849	56.9875	-5.81641	11.3883	58.3169	29.3936	-13.1617	-9.30664	32.5042	91.5156	42.2965	8.1438	-80.9677	40.4561	23.1132	-34.835	74.9558
47.7192	36.6703	-52.0931	16.9691	-11.5834	11.0204	-22.5818	37.9298	56.4392	7.45093	-19.8322	34.6462	74.9077	-8.59009	-4.11768	68.9456	21.9601	-68.5079	18.5334	25.7938	68.1916	36.1235	-81.4373	-31.0791	-22.5334	105.707	18.2786	-6.08447	8.42261	-10.0708	9.35889	9.35852	35.9568	57.2587	-5.71448	11.4927	59.6398	30.3018	-14.1791	-9.05383	32.0835	91.302	42.5259	8.21667	-81.7727	40.1969	21.1736	-35.0898	74.9805
47.2461	37.1041	-52.3892	17.7604	-12.8224	10.6166	-22.2704	37.5553	57.1838	6.94495	-19.2805	35.382	74.7883	-9.54114	-3.4314	69.5046	22.3552	-68.9554	18.2489	25.2471	67.8389	36.3135	-81.2654	-31.5449	-22.5505	106.468	17.9801	-6.13098	7.00098	-10.0482	9.3905	9.6095	36.7236	57.4858	-5.42126	11.8032	60.2039	30.6929	-15.0399	-8.93494	32.3546	91.2839	42.5082	8.26782	-84.1262	40.1386	20.1932	-35.3444	74.9867
46.8983	37.3118	-52.7065	18.4891	-13.8717	10.328	-22.0421	37.682	57.6689	6.99609	-18.608	35.5552	74.6002	-10.1311	-2.61584	70.2648	22.5668	-69.7657	17.7115	24.4413	67.1486	36.4239	-80.775	-32.3442	-22.7759	107.874	17.5228	-5.9248	5.84717	-10.0386	9.43945	9.28394	36.9901	57.8776	-5.1084	11.8521	61.7748	31.7764	-16.2142	-8.05847	33.5283	91.0569	42.5636	8.31702	-84.407	40.1736	19.193	-35.3889	75.0553
46.5873	37.6451	-53.0117	19.2344	-14.3818	10.1859	-21.2587	37.734	57.9436	6.77356	-18.0598	35.4712	74.41	-10.9816	-2.10168	70.8635	22.6893	-70.7123	17.5522	23.6256	66.7534	36.2921	-79.63	-33.3378	-22.8132	108.957	16.812	-5.58398	4.75488	-9.93384	9.96167	9.02869	37.4567	58.2195	-4.90747	11.8191	63.7031	32.7112	-17.6553	-7.33337	35.6466	91.62	42.5367	8.24524	-85.0927	40.241	17.5571	-35.0273	75.0472
46.031	37.8507	-53.0905	19.401	-15.1158	9.74072	-20.0095	37.5339	58.2014	6.81812	-17.8694	35.0823	74.2001	-11.2421	-1.87378	71.6522	22.8746	-71.7325	17.7063	23.1785	66.5936	36.1912	-78.6547	-34.4625	-22.583	109.504	16.2709	-4.84033	4.77747	-9.32825	10.425	8.59753	37.9742	58.2963	-4.47253	11.7841	65.1115	33.0002	-18.2581	-7.1604	37.0071	91.9856	42.4817	8.27185	-85.6257	39.8248	16.3663	-34.835	75.032
45.0367	38.0281	-53.2156	19.3218	-16.6237	9.25098	-19.1458	37.3214	58.3325	6.96204	-17.9941	34.8911	74.1202	-11.5983	-1.40308	72.3166	23.0223	-72.4214	18.0474	22.3281	66.5197	36.1188	-77.8756	-34.913	-22.5839	110.11	16	-4.22473	4.78552	-8.5813	10.5184	7.64514	38.3326	57.7656	-4.14966	11.8746	67.2008	33.2139	-18.6952	-6.8147	38.5569	91.9871	42.524	8.28186	-86.714	39.3663	15.1881	-34.3042	74.9677
43.6183	37.9889	-53.2551	19.3569	-17.0813	9.11731	-18.9075	37.2036	58.4694	7.01587	-17.9598	34.6693	73.8223	-11.9406	-0.71875	73.2622	23.1045	-73.0457	18.3226	21.7104	66.5327	36.1237	-76.2518	-35.4117	-22.7706	110.615	15.5028	-3.74695	5.1123	-7.82678	10.6351	6.88965	38.5762	57.4072	-3.95532	11.9896	68.3027	33.6653	-19.0107	-6.66455	38.4252	92.4064	42.4928	8.0249	-89.3035	38.645	15.1282	-33.926	74.6976
42.9862	38.1199	-53.4784	19.3711	-17.3844	8.93542	-18.1063	37.0764	58.9045	6.95483	-18.5731	34.5497	73.4896	-11.8813	-0.375488	74.2745	23.0746	-73.5884	18.713	21.4833	66.5028	35.9867	-74.193	-35.7924	-22.6785	112.485	14.9409	-2.37756	5.11414	-7.1803	10.5317	6.44275	38.7544	57.4556	-4.4209	12.295	69.4165	33.0176	-19.59	-6.46497	38.712	90.9755	42.5763	7.90479	-90.3802	38.2068	15.2404	-33.3102	74.2839
42.332	38.5076	-53.5598	19.365	-17.3917	8.68042	-17.7672	36.8629	59.1206	6.79517	-19.4476	34.4487	73.2417	-11.9199	-0.0725098	74.8888	23.3086	-73.5089	19.3425	20.9015	66.411	35.8865	-73.0717	-36.0381	-22.9515	113.507	14.8224	-2.06287	5.17957	-7.90332	10.5648	6.16309	38.7681	57.1895	-4.88611	12.415	69.8345	32.6083	-20.0383	-6.10254	38.3401	89.7145	42.5223	7.69653	-90.665	37.5603	15.2664	-32.9071	73.9712
40.7754	38.554	-53.448	19.37	-17.5052	8.30664	-17.155	36.6968	59.4503	6.75085	-20.1346	34.8149	73.5498	-11.9783	0.649902	75.4757	23.4265	-73.3384	19.8351	20.3234	66.3051	35.5635	-72.5533	-36.2347	-21.506	113.657	14.9241	-2.08752	5.06616	-9.07837	10.5177	5.6886	38.817	56.7202	-5.83008	12.3947	71.2703	32.3859	-20.2635	-5.28125	37.6899	88.2695	42.5354	7.448	-91.0364	35.5868	15.3304	-32.6868	74.8115
39.6892	38.7989	-52.9806	19.3337	-17.4987	8.20508	-16.2452	36.7677	59.5585	6.96008	-20.7025	35.2141	73.8723	-12.5919	1.47668	76.1235	23.3752	-73.7964	20.3158	19.8503	66.1665	35.1168	-72.257	-35.1647	-20.1088	114.108	15.5049	-2.4032	5.33337	-9.70703	10.6953	5.1908	37.4617	56.1428	-6.6875	12.6075	72.4032	32.545	-20.5339	-4.01404	37.5291	87.3958	42.5	7.59827	-93.1565	34.6155	15.381	-32.5018	74.6592
39.0902	38.9269	-52.6171	19.2379	-17.1077	8.29749	-15.8682	36.8801	59.1868	7.21411	-21.7222	35.5316	74.6943	-12.6537	1.72351	78.1205	23.2816	-73.9335	20.6205	19.35	66.4237	34.9624	-71.2716	-34.2078	-19.2261	114.42	15.8652	-2.71619	5.37781	-9.72839	10.8245	3.71863	36.149	54.8302	-7.56396	12.97	73.2078	32.9633	-21.2443	-3.50049	37.3417	86.457	42.5573	7.3916	-94.208	33.8876	15.4883	-32.6803	74.1943
38.2166	39.0087	-52.4115	18.6815	-16.9393	8.48193	-15.2861	36.9664	58.519	7.47522	-22.6566	35.8054	75.405	-13.1199	2.12476	78.843	22.8359	-73.3348	21.1909	19.2164	66.6046	34.7589	-70.4247	-33.4651	-18.8973	114.881	16.4006	-3.31995	5.05554	-9.77917	11.0078	3.25281	35.0305	54.5255	-7.89038	13.3712	74.2561	33.4114	-21.655	-3.31555	37.7946	85.1514	42.5509	7.28113	-94.5643	33.1597	15.6532	-32.8167	73.9863
37.2434	39.1284	-52.4248	18.3534	-16.6168	8.7561	-15.1824	36.8812	57.6699	7.8009	-24.1075	35.9384	76.1019	-13.4174	2.67847	79.3445	22.21	-72.922	21.5276	19.0804	66.4646	34.7465	-69.3669	-33.2125	-18.3291	115.116	16.7985	-4.12952	4.39417	-9.94043	11.0448	2.40149	34.4004	53.8655	-8.02783	13.696	75.291	33.7491	-21.8567	-3.56116	38.1896	84.2113	42.5781	7.375	-94.8717	32.2765	15.7142	-33.024	74.0128
36.7865	39.056	-55.1577	17.6478	-16.2018	8.78735	-14.6168	37.0808	56.7489	8.18738	-25.0509	36.0305	76.8022	-13.9967	3.16479	80.3521	21.9008	-73.0095	21.4556	18.5673	66.2981	34.762	-68.8654	-32.9224	-18.0811	114.838	17.1642	-4.42175	4.1095	-9.90759	11.0425	1.9502	34.0577	53.709	-8.26453	14.1865	76.3813	33.9575	-22.2659	-3.88232	39.5757	83.1571	42.7699	7.42651	-95.3369	31.6079	15.5475	-33.3688	74.0776
36.953	38.9248	-55.2183	17.0424	-15.6918	8.89722	-14.1351	37.0186	55.765	8.23914	-25.4149	36.0303	76.8079	-14.2985	3.92859	81.8892	21.4182	-73.6893	21.4193	16.7474	66.3396	34.8027	-68.8961	-32.7483	-17.7408	114.328	17.7661	-5.08948	3.59949	-9.81958	10.9484	1.5769	33.282	53.6965	-8.52673	14.3923	76.9004	35.8944	-22.6277	-3.97253	40.8285	82.8342	42.839	7.79919	-95.9175	30.8547	15.4894	-33.4331	74.0513
37.0209	38.9979	-58.4514	16.4823	-15.8182	8.90051	-13.9327	36.292	54.7573	7.9845	-26.2136	36.0482	76.8379	-14.8922	4.25	83.1165	21.3176	-74.1069	21.4177	15.835	66.4022	34.6766	-68.8925	-32.6205	-17.2922	113.654	18.1947	-4.94995	3.1134	-9.79297	10.9413	1.14136	32.9719	53.9645	-8.9375	14.4651	77.2523	37.4685	-23.2047	-2.98816	40.8962	82.8109	42.6254	8.36731	-96.1284	30.0414	15.6774	-33.9589	74.3677
37.1342	39.0973	-59.0132	15.8302	-16.5138	8.97595	-13.7828	35.9164	53.7011	7.65955	-27.97	36.2548	77.1316	-15.2594	4.5094	84.2667	21.7439	-74.8625	21.6077	14.6775	66.2498	34.6854	-69.0967	-32.5908	-16.5686	113.317	18.8827	-4.98242	3.12354	-9.89758	11.8186	1.01636	33.6783	53.9692	-8.30396	13.8745	77.541	38.0953	-23.8988	-2.0979	41.5847	82.5736	42.5376	8.57434	-96.7375	29.2551	15.7518	-35.2577	74.5055
36.8517	39.198	-59.9558	16.272	-16.5599	8.94812	-13.2212	35.3196	51.575	7.38562	-29.1866	37.189	77.4817	-15.9401	4.67419	85.2019	23.1139	-75.6106	21.5635	13.4957	65.9852	34.7008	-69.1593	-32.6025	-16.3763	113.186	19.6711	-4.38879	3.08325	-10.4524	12.4819	1.01807	33.8148	53.8619	-7.37158	13.071	77.8116	39.0524	-24.4167	-2.03406	42.4043	82.347	42.4764	9.17566	-97.1819	27.9298	15.7963	-36.2523	74.5223
36.3706	39.2335	-60.4691	15.7433	-15.9901	8.87537	-12.7917	35.0513	49.998	7.37964	-29.7227	37.8608	77.8461	-16.3583	4.98962	85.8585	24.3218	-76.1294	21.6459	12.355	65.718	34.4689	-69.2063	-32.6111	-16.3687	113.363	20.2498	-3.66919	3.20447	-11.1425	13.1949	1.11145	33.9756	53.6873	-6.66577	11.9539	78.1218	40.5013	-24.9066	-1.9856	42.0657	82.2642	42.4611	9.60498	-97.6403	26.2125	15.6279	-37.4908	75.1993
36.2175	39.3826	-60.9424	15.1046	-14.9597	8.24207	-12.3882	34.7482	49.252	7.71716	-30.2404	38.7162	78.0417	-17.2594	5.09375	86.7944	24.9299	-76.2087	21.7632	11.7957	65.1646	34.6263	-69.2841	-32.5703	-16.8406	113.274	20.7397	-2.82031	3.46899	-12.9061	14.0031	1.05103	34.0303	53.4725	-6.55481	9.97717	78.2153	41.7704	-25.2955	-1.06152	43.1423	82.3809	42.4064	10.011	-98.2255	26.1409	15.4883	-38.0538	74.9435
36.2288	39.6466	-61.5038	14.6685	-14.2989	7.69397	-12.9519	34.0375	48.6793	7.83899	-30.6731	39.5613	78.2485	-17.5011	5.43591	88.6744	25.3501	-76.1339	21.9017	10.8359	64.6581	34.8704	-69.4989	-32.5688	-17.1708	113.441	21.2714	-1.93311	3.42395	-13.4059	14.8384	1.01404	33.9851	53.3013	-6.7251	8.25134	78.333	42.7786	-26.2843	-0.47229	44.9457	82.3538	42.3708	10.0367	-98.6423	25.4562	15.4022	-38.7211	75.2692
36.6993	39.8638	-61.3644	14.269	-13.587	7.68054	-13.1967	33.406	46.1674	8.52551	-31.5184	40.7961	78.2001	-17.656	5.43713	89.6002	25.8367	-76.4114	21.9922	9.43494	64.3502	35.2203	-70.1752	-32.5444	-17.5258	113.311	21.7233	-1.35254	3.43054	-13.3457	15.7186	0.769043	33.8843	53.4431	-6.95581	7.57288	78.3905	43.1135	-27.1196	-0.845215	45.8921	81.6232	42.0297	10.2842	-98.8848	24.5709	14.967	-39.6885	76.1683
37.275	40.2893	-61.2501	13.9052	-12.958	7.00098	-13.74	32.974	44.7111	9.0022	-32.314	41.9567	78.2418	-18.3326	5.07898	89.8364	26.3237	-76.5319	22.2236	8.57812	64.2178	35.9491	-72.3791	-32.5308	-17.462	113.537	22.2255	-1.05615	3.31873	-14.3173	16.4512	0.399536	33.7114	53.3378	-7.06091	7.10938	78.6024	41.8969	-27.4005	-1.12744	47.0507	81.1273	42.0922	10.5618	-100.009	24.0797	14.7531	-41.2825	76.2834
38.0092	40.4352	-60.5919	12.8367	-12.6754	5.95667	-15.2595	32.3413	43.6823	9.677	-32.7599	42.4456	78.21	-18.702	4.12183	89.6583	27.0121	-76.1718	22.2836	7.75574	64.0278	37.1349	-73.4901	-32.5612	-17.3247	113.468	22.6001	-0.912476	3.32019	-15.7253	17.0734	0.0469971	33.5468	53.1323	-6.82324	6.00256	78.6981	39.9351	-27.948	-2.40674	47.8013	80.938	41.839	11.0764	-100.904	23.5579	15.0452	-42.3727	76.9629
38.4302	40.6263	-59.9111	11.8661	-12.9703	5.15173	-16.2939	32.1603	42.2756	10.1615	-33.2218	42.6025	78.3842	-19.0891	3.70361	89.0933	27.0314	-75.7612	22.4662	7.66687	64.2583	38.2898	-74.3773	-32.5977	-17.5109	113.474	23.0916	-0.64563	3.39551	-16.8699	17.6356	-0.16687	33.6094	52.7681	-6.48474	3.97388	78.853	38.6829	-28.7676	-3.95544	47.866	79.9458	41.7834	12.3174	-101.297	22.9363	15.2115	-42.0924	77.5822
39.2748	40.8418	-59.4921	11.4083	-13.1656	3.89368	-17.0507	31.6029	41.2651	10.9133	-33.7594	42.6605	78.6016	-18.7938	2.81189	88.4087	27.1	-75.4049	22.5548	7.03394	64.4777	38.4174	-76.6552	-32.6021	-17.8511	113.455	23.196	-0.609619	3.32727	-17.3655	17.894	-0.637329	33.6799	52.0936	-5.91235	3.10962	79.1166	37.077	-29.8766	-4.67737	48.2463	79.1848	41.5657	13.9004	-101.454	22.7179	15.1123	-42.2472	78.3885
40.1504	41.2068	-58.9084	11.2443	-13.2885	3.41431	-17.7404	31.3328	40.0011	11.7139	-33.2639	42.9413	78.5626	-17.7417	2.33984	87.0942	27.2958	-75.6564	22.5425	6.59595	64.7039	38.4513	-78.5831	-32.5977	-17.9379	113.314	23.2433	-1.11609	3.24817	-17.9258	18.6935	-1.05469	33.6078	50.8534	-5.49365	2.7804	79.4601	37.0646	-30.8628	-6.15173	48.1334	79.1766	41.1766	14.3177	-101.813	22.3331	15.3364	-43.2222	78.9312
41.1439	41.1959	-58.0183	11.4951	-13.0671	2.4834	-18.2699	30.5369	38.9644	12.1943	-33.0358	43.0253	78.5178	-16.9545	1.71497	85.6504	27.6395	-75.6943	22.6954	5.62708	65.1472	38.4937	-78.7831	-32.5654	-17.6119	113.072	23.382	-1.62756	3.38892	-19.2476	19.3254	-1.51526	33.5537	49.933	-4.61755	2.00146	79.1249	37.1665	-31.7789	-7.44324	47.7708	78.036	40.5476	14.7064	-102.488	22.2678	15.3639	-43.6387	79.1564
42.4407	41.308	-57.399	11.0905	-12.853	2.12207	-18.7313	29.8633	37.6224	12.806	-32.5764	42.7902	78.5677	-16.667	0.432739	84.962	27.4376	-75.2662	22.7876	4.68835	65.8528	38.5559	-79.8929	-32.5529	-17.2581	112.802	23.5312	-2.12207	3.33374	-19.6379	19.7046	-1.62451	33.3394	49.0975	-4.09167	0.188965	78.3905	37.2742	-32.788	-8.80859	48.8516	77.2977	39.9293	14.6704	-103.052	22.0072	15.3944	-44.0328	79.3552
44.2393	41.4111	-56.8474	10.5653	-13.498	1.83362	-18.9122	29.2629	36.7678	13.1403	-31.4388	42.7062	78.6105	-15.8901	-1.00781	84.165	27.2521	-75.1985	22.7787	3.97461	66.9305	38.8929	-81.5764	-32.6886	-16.5717	112.309	23.7524	-3.03735	3.13562	-20.9763	20.2122	-1.81335	33.2985	48.5564	-3.79285	-1.00574	77.4574	37.322	-33.4109	-10.673	49.8568	74.9098	39.995	15.0548	-103.281	21.8315	15.4554	-45.9348	79.6254
44.9677	41.3538	-55.7465	9.83923	-14.0513	1.52283	-18.8905	28.4148	36.1669	13.0684	-31.0378	42.5699	78.5759	-15.0435	-2.15381	83.5463	27.1741	-75.4385	22.6803	3.89673	68.9933	39.6689	-83.3751	-33.0203	-15.6644	112.029	23.8182	-3.2334	2.95288	-23.4773	20.4033	-1.85754	33.2952	48.3302	-3.45215	-1.29321	77.1886	36.9534	-34.5753	-12.4294	49.6763	73.6533	40.0732	15.528	-103.479	21.9573	15.2411	-46.5508	81.1578
45.3384	41.2469	-54.8446	8.36072	-14.4851	1.29065	-18.9329	27.1144	35.8684	13.0675	-29.9309	42.7775	78.686	-14.6151	-3.08752	82.7845	26.9673	-76.1127	22.5591	3.77148	71.1851	40.3647	-84.1605	-33.8734	-15.3424	111.937	23.9611	-4.30725	2.677	-25.2357	20.6542	-2.26855	32.9341	48.1155	-3.02368	-1.73132	76.6813	35.693	-36.2201	-12.5957	50.0468	73.3168	39.6041	15.9806	-103.786	22.3527	15.1024	-46.8604	82.3605
45.5216	40.8928	-54.1698	7.52405	-14.75	1.34338	-18.9487	26.8032	35.5995	12.8169	-28.5277	43.2423	78.6984	-14.2992	-3.83069	81.9674	26.8644	-76.3566	22.5392	3.50842	72.0447	40.7002	-84.5023	-34.5592	-14.6564	111.953	23.8859	-5.1687	2.47314	-26.0526	20.6963	-2.79346	32.4624	48.4304	-2.92896	-2.27185	76.2871	34.9814	-38.4388	-12.0344	49.8837	72.5514	39.0212	16.425	-103.176	23.0253	14.7474	-47.4471	83.6199
46.5562	40.2213	-53.623	7.10645	-14.7021	1.44067	-18.6727	26.2025	34.7302	12.6893	-27.2438	43.4955	78.7471	-14.1914	-4.58984	81.8604	26.7909	-76.5168	22.4912	3.64722	73.2286	41.2114	-84.6337	-35.5281	-12.6088	112.197	23.879	-4.89966	1.91858	-26.7283	20.8098	-2.96826	32.4774	49.4045	-3.05688	-3.58826	75.4827	34.1954	-39.5922	-8.80872	50.1178	71.1851	38.3555	17.1876	-102.594	23.5405	14.3992	-47.6589	84.4618
47.379	39.9669	-52.6036	6.302	-14.3988	1.54883	-18.428	26.0959	34.4146	12.5194	-26.5862	43.6168	78.7285	-14.6732	-5.3064	81.7108	26.7288	-76.1324	21.827	3.8302	74.9565	41.8926	-84.3077	-36.599	-11.4756	112.044	23.6322	-4.76477	1.62451	-27.8835	21.1793	-2.37292	32.3087	49.9696	-3.36768	-4.57153	75.033	33.636	-40.6552	-7.08057	50.9506	69.6487	37.8835	17.5125	-101.283	24.0712	13.8385	-47.6744	85.0584
48.3184	39.6725	-52.1705	5.14734	-14.0352	1.67334	-18.4393	25.6897	34.0201	12.3011	-26.0686	43.5172	78.7456	-14.9897	-6.52393	81.6945	26.3105	-75.6158	21.4745	4.02222	76.4218	42.4661	-84.1621	-37.1877	-10.816	112.148	23.512	-4.22009	1.35364	-29.2429	21.2579	-1.58716	32.3395	50.775	-3.45044	-4.75818	75.0386	32.3431	-41.973	-6.28711	51.7148	68.7101	37.3925	18.1631	-99.6477	24.5325	13.5466	-47.6733	85.3662
48.816	39.4261	-51.7743	4.68628	-14.0737	2.14844	-18.5393	25.3729	33.8324	12.1134	-25.634	43.4718	78.693	-15.2689	-7.66101	81.652	25.8217	-74.856	21.22	4.8606	77.167	42.8727	-83.6899	-37.722	-9.90784	112.223	23.4459	-4.32715	1.05103	-30.7135	21.2484	-1.2063	32.147	51.6843	-3.7749	-5.27979	75.5712	31.4229	-43.1422	-5.08582	51.4539	68.0723	37.0591	18.5671	-99.3562	25.2389	13.1646	-48.1821	85.4784
48.9176	39.5371	-51.4249	4.10815	-13.84	2.62878	-18.5171	25.0643	33.9025	11.9445	-24.605	43.6697	78.6587	-15.3984	-8.43921	81.8185	25.0237	-75.481	20.9674	5.27063	77.4832	43.137	-83.0312	-38.7361	-9.30505	112.248	23.7917	-4.66541	0.792725	-31.3204	21.2072	-1.89038	31.5935	52.3372	-4.27258	-5.62964	76.2659	30.6157	-43.9918	-4.42114	51.6105	67.0873	36.7582	19.0775	-99.4927	26.5378	13.2754	-48.6598	86.4653
49.0278	40.2661	-50.7394	3.74023	-13.5103	3.01245	-18.6337	24.4453	33.8563	11.6699	-23.0061	44.478	78.7162	-15.3787	-8.44275	81.9331	23.9502	-74.1938	20.2124	5.3783	77.3518	43.0167	-82.8422	-39.7297	-8.97229	112.081	24.5493	-4.68298	0.498657	-31.6344	21.3545	-1.74426	30.4697	52.6604	-4.32739	-5.95154	77.4585	29.3187	-44.0881	-4.58093	51.7595	66.251	36.8619	19.5229	-98.8308	27.3955	13.1274	-49.8198	87.8119
49.5609	40.9556	-50.0222	3.33545	-13.4158	3.52795	-18.7162	23.905	33.9077	11.0574	-22.549	44.77	78.8584	-15.4878	-8.56458	81.7766	22.5765	-73.3804	18.9803	5.87915	78.1866	43.1868	-82.3422	-40.1318	-8.54175	111.614	24.6008	-4.75537	0.930786	-31.7505	21.1278	-1.86755	28.8557	51.8301	-4.21973	-6.37292	79.205	27.7058	-43.1198	-4.69739	51.8823	65.0101	36.8114	20.8077	-98.6925	28.2816	12.9612	-50.0739	89.5575
49.9324	41.4983	-49.256	3.00623	-13.1516	3.90698	-18.7245	22.896	33.757	10.1715	-22.2162	44.8257	78.9047	-15.5023	-8.5658	81.3778	21.4708	-71.8297	18.234	6.27563	79.1315	43.6459	-82.6766	-40.8755	-7.74744	111.359	24.8503	-5.24915	1.81848	-31.7158	20.9401	-2.0354	28.8705	50.46	-3.87012	-6.72253	80.5305	26.7268	-43.941	-4.91003	51.9493	63.9316	36.8672	20.984	-98.6084	28.8796	13.4803	-49.8424	90.4753
50.2296	42.3124	-48.6281	2.66443	-13.2333	3.98022	-19.3473	22.0123	33.756	9.95764	-21.7263	44.6357	78.9613	-15.5883	-8.47119	81.1907	20.7894	-71.3373	17.6814	6.56042	79.6721	43.7949	-82.4777	-42.181	-7.60999	111.505	24.7793	-5.42493	3.0144	-31.3594	20.7001	-2.01343	28.2942	49.651	-3.48145	-7.5332	82.6862	25.879	-43.8202	-5.17773	52.2621	63.2488	36.908	21.1069	-98.847	30.2151	14.1293	-50.1801	90.969
49.8785	42.8044	-47.6552	2.51416	-11.8711	4.05603	-19.5232	21.5707	33.9302	9.2854	-21.255	44.6984	79.2288	-15.8275	-8.36365	80.3507	19.7552	-70.9143	17.291	7.00598	79.6669	44.047	-82.3434	-44.2513	-7.0304	111.829	25.0225	-5.823	2.86157	-30.24	20.6898	-1.92798	27.1842	48.7932	-3.15784	-8.34387	82.9624	25.241	-44.3574	-5.3009	52.469	62.0979	36.8358	22.7423	-99.1947	30.7764	14.5665	-50.9694	91.2072
49.6125	43.9471	-46.719	2.42725	-11.5317	4.13904	-19.7898	20.7291	34.0979	8.3053	-20.4662	44.984	79.611	-15.9304	-8.62256	79.657	18.6649	-70.6201	16.9354	7.79309	79.8774	44.1902	-82.2258	-45.254	-6.94983	112.276	24.9933	-6.34497	2.55579	-28.8921	21.0732	-1.76013	26.7634	47.7505	-2.68274	-8.62561	84.6985	25.1438	-44.4751	-5.23242	52.6786	60.3604	36.8397	23.7871	-99.0718	32.7952	15.125	-51.2817	91.0234
49.3575	44.2633	-45.4557	2.32031	-10.2941	4.21436	-20.231	20.5875	34.0172	7.53406	-19.1715	44.9186	79.8134	-16.3879	-8.78259	79.121	18.1893	-70.1785	16.3368	8.52197	79.8363	44.5328	-82.2538	-45.8964	-6.8241	112.32	24.9812	-6.92358	2.2323	-27.7987	21.7316	-1.65759	26.4664	46.5867	-2.56091	-8.01038	86.0605	24.2999	-42.9437	-4.98096	52.8152	59.4402	37.0406	23.9249	-99.2227	33.6205	14.5784	-51.6407	90.0431
48.8779	43.9287	-44.7534	2.17163	-9.53772	4.95276	-20.5059	20.1447	33.651	6.15527	-18.9629	44.9485	79.9109	-16.4264	-9.38513	77.7811	17.7461	-69.7703	15.9479	8.78137	79.8793	45.0952	-82.3693	-46.5575	-6.45618	111.722	24.7975	-7.09253	2.24927	-26.723	22.2681	-1.44568	26.7307	46.2123	-2.26489	-7.4696	88.5214	23.7397	-42.1934	-5.05701	53.0032	58.9604	37.1315	23.9686	-98.7003	34.6163	13.8806	-51.8264	89.1071
48.589	43.6112	-44.1173	2.32642	-8.76709	5.30664	-21.3568	19.8824	32.8717	4.84912	-19.165	45.2504	80.063	-17.2301	-10.1588	77.2654	16.2557	-69.3085	14.9561	9.53333	79.576	45.9956	-83.4752	-47.7533	-6.19482	111.378	24.8075	-7.38342	2.82629	-24.6291	22.6132	-1.16016	26.8199	46.6543	-1.88818	-7.17456	89.3807	23.7805	-42.4724	-5.36182	53.5006	58.6353	37.1844	23.8229	-98.6234	36.3806	13.4126	-52.4611	89.2471
47.5895	43.8022	-43.4478	2.20947	-8.38525	5.82788	-21.7957	19.9066	31.7706	3.625	-20.2229	45.9193	80.0486	-17.6643	-10.8518	76.6198	15.3977	-69.0798	14.3064	9.79492	79.1417	46.4575	-85.3903	-49.0842	-6.22705	111.78	24.9615	-7.80371	3.66431	-23.6272	22.6433	-0.763306	26.9982	46.8563	-1.67322	-7.15479	90.0779	23.8281	-42.6069	-5.96472	53.2147	57.5216	37.0394	23.8325	-98.579	37.6877	12.7057	-52.8761	89.499
46.6393	43.8595	-42.8969	2.10681	-7.72693	5.93762	-21.8977	20.0643	30.845	2.73865	-21.051	46.1139	79.986	-17.9183	-11.1069	75.7762	14.4609	-68.71	13.8563	9.69592	78.889	47.0104	-86.8058	-49.1511	-6.16833	112.167	24.8201	-8.72522	4.34631	-22.2334	22.6359	-0.543335	26.5167	46.9573	-1.57288	-7.33813	90.7697	24.3953	-43.0322	-6.01245	53.1719	55.5762	36.9945	23.4767	-98.2644	39.2172	12.1333	-53.5278	89.2914
46.3811	43.7828	-42.2686	2.36865	-7.32349	6.13538	-22.3439	20.1539	29.1864	1.46069	-22.8662	46.5087	80.1306	-18.516	-11.4869	75.6395	13.6895	-68.3571	13.5541	9.81055	78.1594	46.7648	-87.068	-51.0761	-6.42249	111.595	24.1729	-9.00745	5.05896	-21.8236	22.6062	-0.3927	26.4213	46.9044	-1.3501	-7.7937	92.0276	24.985	-44.0322	-5.63696	53.2373	54.9402	37.3014	23.0602	-97.9959	38.6819	12.0223	-53.6636	88.2517
46.0815	43.7557	-41.8364	2.34814	-6.14124	6.245	-23.3966	20.229	27.5273	-0.0333252	-24.0177	46.2301	80.1953	-18.6016	-11.6925	75.5051	12.5483	-68.2462	13.3755	9.68909	77.4814	47.0719	-88.5961	-52.1294	-6.40137	111.462	23.5709	-9.3573	5.05566	-21.599	22.6541	-0.26355	26.2377	47.0833	-1.02783	-7.98108	93.3035	25.3428	-44.2941	-4.64832	53.5602	54.3273	37.6771	22.0736	-97.6644	37.9248	12.004	-54.3954	87.0858
46.0221	43.5811	-41.3622	2.27722	-5.67224	6.41565	-24.0135	20.1519	26.7461	-1.31689	-24.6798	46.322	80.4142	-18.5625	-11.8105	75.8529	12.1389	-68.1393	12.8893	9.46655	77.241	46.3125	-90.2273	-53.2373	-6.16772	111.078	23.0597	-9.59424	5.07324	-21.0521	22.7053	0.119019	25.7091	47.4382	-1.02051	-8.84802	94.8718	25.5398	-44.3199	-3.70337	53.5872	53.7439	37.9879	21.4341	-97.3342	36.64	11.9139	-54.5471	85.1805
46.0217	43.4493	-40.5308	1.75952	-4.77478	6.50378	-24.0092	19.9768	25.1415	-1.67871	-25.1957	45.8268	80.485	-18.678	-11.6196	76.2057	12.1957	-68.4371	13.339	9.71619	77.3525	44.8387	-92.0358	-54.2612	-5.94812	110.875	22.6223	-10.2778	4.95386	-20.249	22.8284	0.674316	25.8334	47.5761	-0.879517	-9.74438	95.5414	27.0654	-44.6414	-2.69788	53.6133	52.9211	38.1317	21.2339	-97.3995	35.3772	11.8391	-54.6866	84.0276
46.0063	43.365	-39.8446	1.39331	-3.69873	6.49902	-24.5431	19.7279	23.2859	-2.48218	-26.9019	44.2959	80.5416	-18.8236	-11.245	76.8176	10.3574	-68.7048	14.1383	9.79102	77.943	44.1147	-92.5011	-55.5099	-5.84167	110.776	22.3439	-10.3571	4.87256	-20.0543	22.6041	1.21033	26.2111	47.7645	-1.22412	-10.8036	96.2318	26.724	-44.975	-2.11072	53.6497	51.6744	38.1671	20.8025	-97.3536	32.7769	11.8013	-55.1024	82.8839
45.9548	43.1465	-39.1293	1.15063	-3.45544	6.65247	-24.6652	19.2325	22.6147	-4.5603	-28.2164	43.4235	80.4467	-19.1216	-10.8738	76.9926	9.38269	-68.8108	15.538	9.64954	78.1918	43.23	-93.2469	-56.3052	-5.79407	110.895	22.8379	-10.2959	4.86035	-19.592	22.4434	1.39001	26.037	47.7354	-1.75391	-11.9315	98.3253	26.1428	-45.588	-1.77673	53.8876	50.6378	38.5022	19.9646	-97.6355	32.0409	11.6294	-55.9525	81.8778
46.0144	43.0372	-38.6458	1.30188	-2.59949	6.80383	-25.545	19.1342	22.0118	-5.37134	-29.4207	43.1381	80.0439	-19.3016	-10.6919	77.4614	9.05884	-68.9496	15.3881	9.57947	79.3732	42.8065	-95.174	-57.0568	-5.81299	110.833	23.2592	-10.1252	4.8158	-19.9148	22.4563	1.60596	25.5963	47.3883	-2.03259	-12.5925	99.5948	25.9553	-45.9117	-1.7616	53.9762	50.069	38.9457	19.4532	-97.8604	31.6565	11.1528	-56.7581	81.6169
45.9645	43	-38.0546	0.859253	-0.803711	7.18665	-26.0365	18.677	21.3264	-5.79346	-30.2424	42.2089	79.1366	-19.5635	-10.7792	78.1383	10.323	-69.4211	15.493	9.82349	80.2621	42.1426	-96.9242	-57.7163	-5.7854	110.747	23.934	-9.92505	4.94458	-20.4381	22.5041	2.12549	25.5693	46.8805	-2.34302	-13.3837	100.226	26.0381	-46.3094	-1.99939	53.8257	49.8737	39.2186	19.1251	-99.0337	31.8674	10.87	-58.0203	81.6227
46.0068	43.1112	-37.4163	0.157715	0.122192	7.51453	-26.5853	18.2819	20.4366	-6.53088	-31.6351	41.1838	78.5537	-19.8271	-10.9203	79.2792	11.5704	-69.4967	15.7	10.1155	80.0359	41.0172	-98.1049	-57.8741	-6.01929	110.536	23.8727	-9.68811	5.02759	-21.2001	22.6949	2.33923	25.2954	46.5676	-2.3075	-13.7198	100.948	26.3022	-46.835	-1.97681	53.9045	49.5563	39.0825	18.6101	-100.174	32.1788	9.91028	-57.9038	81.6045
45.8701	43.0457	-37.0195	0.2854	0.866943	7.4906	-27.5195	18.0197	19.8768	-7.72449	-32.688	40.2532	77.7216	-20.2009	-11.2948	80.5959	13.0074	-69.3707	16.2902	9.89624	79.0559	40.4954	-98.8676	-58.3695	-6.0426	110.522	23.8699	-9.35632	4.90894	-21.9738	23.0663	2.87488	24.9829	46.4349	-2.64832	-14.5017	102.634	26.4919	-47.2451	-1.71082	53.8363	49.2745	38.614	17.936	-101.739	32.4675	9.95947	-58.4023	81.4836
45.9667	42.8916	-36.5709	0.685303	1.76672	7.49377	-27.8218	17.7762	19.2943	-8.97766	-33.2441	39.7494	76.6794	-21.3181	-11.7183	81.1437	13.3702	-69.2412	16.9406	10.0214	79.1815	40.7997	-100.83	-59.0247	-6.31567	110.459	24.054	-9.08728	4.96277	-23.23	22.8872	3.33789	24.2095	46.2727	-3.03955	-15.3414	104.947	27.6172	-47.6194	-0.596436	53.7888	49.1968	38.2324	18.212	-103.792	32.5758	10.4198	-59.0356	81.2321
46.3483	42.6823	-36.3518	0.637451	3.09045	7.52124	-27.9335	17.1987	19.3645	-9.46887	-33.927	40.2808	75.7169	-21.7307	-12.4811	82.2139	13.03	-68.9456	17.725	10.0829	78.4819	41.0984	-101.901	-59.5811	-6.42261	110.116	24.1078	-8.99451	5.09412	-25.1228	22.6073	3.98621	23.7935	46.3669	-3.18799	-15.8184	105.777	28.7336	-48.4901	-0.0101318	53.8113	49.4279	38.0912	18.6108	-106.237	32.3756	10.3334	-60.3723	80.6732
46.6256	42.6362	-36.2002	-0.0357666	3.92651	7.66711	-27.8793	16.5303	19.4264	-9.96741	-34.3351	40.7904	75.0299	-22.3049	-13.1666	83.8462	12.8475	-68.9115	18.1555	10.5989	77.9873	41.3429	-103.012	-60.0358	-6.71985	110.086	24.0666	-8.95532	5.02478	-26.6525	22.4657	4.72778	23.5277	46.1317	-3.6095	-16.0963	106.759	29.1259	-49.177	0.547485	53.8134	50.0642	38.0529	18.1899	-106.667	32.3141	10.1814	-61.1466	80.3075
47.4442	42.729	-35.7659	-0.447388	4.59546	7.99829	-27.2872	16.5258	19.3699	-10.4591	-34.4332	41.3689	74.6929	-22.8566	-13.5431	84.8268	12.8448	-68.9219	18.1658	10.7948	77.7716	41.4297	-103.975	-60.682	-6.90198	110.171	24.1669	-9.0293	5.33167	-27.3452	22.5393	5.35144	23.3097	45.7539	-3.29773	-16.665	107.735	30.2095	-49.7733	1.16357	54.1021	50.3284	38.1146	17.8458	-106.972	32.1876	10.2283	-61.1884	79.6406
47.6593	42.4968	-35.7709	-0.599731	4.77893	8.46265	-26.6351	15.4189	19.4185	-11.0221	-34.0857	41.8459	74.6836	-23.4618	-14.387	85.6912	12.8055	-68.9862	18.0692	11.0321	77.4344	41.5348	-104.876	-61.9612	-7.16284	110.455	24.4382	-9.15417	5.53259	-28.085	22.7457	5.75171	22.41	45.4435	-2.74377	-17.2117	108.261	31.4661	-51.4321	1.78162	54.1826	51.2712	38.1284	17.8706	-108.321	31.8835	10.0067	-62.0469	78.3322
48.0997	41.6692	-35.8348	-0.693726	5.18518	8.6355	-24.5333	14.6039	19.4229	-11.3354	-33.7097	42.0339	74.7869	-24.5806	-15.6285	87.2743	12.8875	-69.1923	17.9398	11.2881	77.3583	41.4728	-105.957	-63.4575	-7.19031	110.878	25.4636	-9.23291	5.8468	-28.9343	22.7676	5.86462	21.8231	44.6066	-1.87769	-17.3976	109.298	31.4686	-52.5195	3.07922	54.8237	51.7589	37.7791	17.6559	-110.395	31.6643	9.52759	-63.5826	76.7469
48.4438	41.5352	-35.948	-0.546631	6.01941	8.81982	-23.5609	14.4871	19.4608	-11.6456	-33.4409	41.9813	74.6587	-25.4114	-16.5958	88.1375	12.827	-69.5278	17.9583	11.4137	77.4478	41.434	-107.527	-64.6373	-6.84473	111.508	26.7867	-9.34668	6.19434	-29.6525	22.9862	6.42688	21.6688	43.9668	-0.824585	-17.6912	110.333	31.9598	-53.2961	3.31885	54.8083	51.6456	37.4155	16.9686	-110.95	30.4761	8.64661	-63.6772	75.2487
49.3562	41.1919	-35.9397	-0.543579	6.89819	9.19067	-22.9504	14.7083	19.3073	-11.967	-33.3855	42.0288	74.8203	-25.6687	-17.2432	88.7957	13.054	-69.804	18.0122	11.7767	77.311	41.4868	-109.064	-65.2096	-6.5708	111.883	27.4957	-9.59424	6.35229	-29.9945	22.9423	6.82178	21.3999	43.4954	0.192383	-18.0482	111.806	32.9731	-54.2657	3.974	54.3516	51.7207	37.356	17.3734	-111.289	29.6803	7.79224	-63.6124	73.8473
49.8422	41.1123	-35.7993	-0.0270996	7.8551	9.61951	-22.7023	14.9086	19.6429	-12.2811	-33.2694	42.0404	74.9364	-25.9381	-18.7781	89.8051	13.3	-69.9147	17.9144	11.5659	77.1215	41.2463	-109.296	-65.2659	-6.34106	112.942	27.7109	-9.58337	6.21436	-30.0801	22.8666	7.35193	21.3337	42.8665	1.41956	-18.6357	112.632	35.2814	-55.0648	4.61694	54.0635	52.3612	37.2794	17.9558	-111.653	29.3286	6.53674	-65.0574	73.4017
50.0544	40.8394	-35.6251	0.596802	9.00256	10.2462	-22.3043	14.7996	19.931	-12.6021	-33.198	41.8549	74.4934	-25.9625	-20.1177	90.4305	13.4202	-70.0226	18.1243	12.2341	77.0251	40.9567	-109.651	-65.1985	-5.94092	113.314	29.7075	-9.40833	6.40784	-30.3031	22.4696	8.00122	21.3002	41.6757	2.35046	-19.3535	113.489	36.6832	-56.5629	5.02527	54.0845	51.6849	37.2731	19.899	-112.294	28.9492	5.59656	-65.674	72.4879
50.1479	39.8575	-35.5796	1.06677	10.1063	10.4889	-21.5391	14.4594	20.5144	-12.9558	-32.9506	42.2294	74.1792	-25.6682	-20.7441	91.328	13.5443	-70.1132	19.1101	12.7424	77.1595	40.4052	-110.231	-65.3142	-5.88074	114.213	30.8644	-9.28076	6.66248	-30.6047	22.2284	8.47083	21.4298	40.5186	2.71777	-20.1752	113.745	37.4103	-58.2322	5.26575	54.3384	51.5265	37.2583	21.7274	-112.58	28.1887	3.96289	-67.8308	70.9308
50.3906	39.1394	-35.8042	1.79395	11.1538	10.6588	-20.3915	14.0188	21.0269	-13.5511	-32.7476	42.6156	73.609	-25.6849	-21.6838	92.1003	13.7444	-70.1772	19.4384	12.9719	77.1271	39.609	-111.073	-65.7336	-6.22461	114.572	31.4202	-9.12817	7.52136	-30.5348	21.7589	8.96631	21.9709	39.8276	3.14844	-20.9177	114.235	38.8914	-58.8351	5.36304	54.6055	51.6807	37.5669	21.9543	-113.127	27.5345	2.87903	-68.8967	69.0762
50.5778	39.4645	-35.9293	2.58777	11.9511	10.5908	-19.9437	13.8322	21.3646	-13.7759	-32.8499	43.6083	73.4659	-25.809	-22.27	92.8931	13.8409	-70.1171	20.0396	14.5134	76.8922	39.5992	-111.372	-65.9662	-6.24561	116.213	31.9758	-9.16101	8.39429	-30.109	21.0793	9.21802	21.9606	39.0306	4.99634	-21.4272	114.409	40.1006	-59.3181	5.3811	54.2981	51.4972	37.606	24.2693	-113.566	26.2228	1.95032	-69.4154	68.6168
50.7396	40.2977	-36.4712	3.04517	12.3997	10.7917	-19.8838	13.7266	21.6421	-13.8281	-33.0288	44.7058	73.4799	-25.7867	-23.1432	93.0797	13.8844	-69.6786	20.5658	15.4635	76.0446	40.2173	-111.362	-66.4526	-6.17639	117.048	32.0337	-9.35474	9.7345	-30.0051	20.736	9.40063	21.6454	38.3286	6.1156	-22.2784	114.635	41.8591	-60.2014	5.19592	54.2809	51.225	37.6013	25.3215	-113.481	25.8152	2.3551	-69.7252	68.1144
51.267	41.7721	-37.1743	3.46289	13.0033	10.7717	-19.8112	13.7297	21.8822	-14.1553	-33.4287	45.9735	73.3387	-25.7714	-24.1209	94.5955	13.9531	-68.5657	20.7638	16.0031	75.6698	40.4449	-110.68	-66.5715	-6.45947	117.675	32.3772	-9.60242	10.2659	-29.8344	20.7443	9.47693	21.8851	37.8566	7.72839	-23.3793	114.785	42.3755	-61.3545	5.09973	54.6938	51.0382	37.6624	26.0967	-113.49	24.9884	3.36133	-70.1632	67.6598
51.5137	42.0177	-37.5325	4.5238	13.7209	11.1708	-19.7728	13.6649	22.0143	-14.5226	-34.2281	47.1943	73.2747	-25.6985	-24.7566	94.8229	14.0021	-68.5613	20.9752	16.1288	75.316	40.3851	-109.654	-66.5833	-6.92859	118.278	32.4956	-9.83899	10.6278	-29.6372	21.0052	9.89319	22.7147	36.8453	8.46436	-24.2173	114.808	43.3661	-62.8257	5.23071	55.1201	51.4061	37.6038	27.4083	-113.71	24.3544	4.9563	-70.8744	65.5938
51.623	42.2011	-37.8202	4.7052	13.7332	11.5433	-19.7604	13.5096	21.9606	-14.6229	-35.6591	48.6864	73.0016	-25.6754	-25.5466	94.3103	13.9174	-67.5531	20.9202	16.1104	74.8634	40.577	-108.801	-66.6606	-7.35303	118.473	33.0874	-9.81274	10.8207	-29	21.0878	10.0059	23.0259	35.9105	9.44507	-25.1095	114.53	44.9795	-63.8417	5.4917	54.5878	51.5956	37.3973	29.6984	-114.083	23.9506	6.1543	-70.8032	63.5809
51.4066	42.2463	-38.1304	5.42944	13.8773	11.7493	-19.5309	13.4569	21.7173	-14.556	-36.4303	49.3363	72.5374	-25.5278	-26.1705	93.9158	13.6864	-65.6749	20.812	16.1254	74.3118	41.1995	-108.277	-66.7263	-8.24463	118.555	33.9982	-9.57874	11.1169	-27.1206	21.0764	9.96924	24.6095	34.7474	10.5098	-25.7935	113.561	46.0524	-64.8807	5.56616	54.4362	51.9021	37.3156	30.3971	-114.72	23.4719	6.1095	-70.5635	62.9672
50.9746	42.4037	-38.6737	5.99915	14.376	11.8981	-19.2615	13.3639	21.7094	-14.5115	-37.5095	49.514	72.1689	-25.2618	-26.9343	93.3881	13.3734	-64.0911	20.5773	16.0708	74.0231	41.2327	-107.582	-66.8044	-8.78516	118.532	34.3522	-9.05957	11.8402	-25.7358	21.2234	10.0391	25.4213	33.6929	12.2581	-26.5289	112.485	47.0259	-66.4926	5.7782	54.4484	51.9747	37.3671	30.4773	-115.198	20.7615	6.03357	-71.0619	63.051
50.6145	42.142	-38.8342	6.3728	14.6683	12.139	-18.1868	13.4943	21.601	-14.4838	-38.1857	49.4772	71.9088	-25.0046	-27.7632	92.6249	13.1609	-62.8275	20.3551	15.9504	74.1769	40.0983	-106.631	-67.1035	-9.63342	118.463	34.8962	-8.53149	13.0568	-24.8042	21.4922	10.1293	25.8145	32.9695	13.204	-27.0785	111.206	48.3284	-67.5253	6.44812	54.6056	52.0748	37.3894	30.884	-115.616	19.6354	5.95178	-71.9294	61.8203
50.041	42.1017	-39.0033	7.23499	14.5697	12.8176	-16.95	13.6841	21.5645	-14.5933	-38.696	49.3535	71.9841	-23.9257	-29.0889	92.0256	13.0779	-61.8872	20.2666	15.8198	74.6396	39.7833	-105.303	-66.7273	-10.3921	118.467	35.4912	-7.65503	14.2347	-23.9379	21.3342	10.0942	25.9395	32.3989	13.8275	-27.51	110.588	49.2708	-69.6428	6.92773	54.9475	52.1702	37.4438	31.515	-116.551	19.2531	5.81909	-72.3376	61.1405
49.6504	41.8915	-38.9368	8.58032	14.5698	13.7567	-15.6521	13.8492	21.4561	-14.7878	-40.3579	48.7557	72.906	-23.467	-29.681	90.8435	12.8185	-60.9768	20.0654	15.8464	74.9847	39.7378	-104.196	-65.9833	-10.8599	118.327	36.616	-7.3197	14.7144	-22.787	21.5529	9.71667	26.309	31.7799	14.8243	-27.9357	110.314	50.6454	-70.1761	7.76501	55.1244	52.3754	37.2916	32.0754	-117.77	18.7477	5.45776	-73.1342	59.6365
48.9832	41.9089	-38.9897	9.14355	15.5813	13.9982	-14.8466	13.8739	21.4921	-14.7833	-41.2052	47.6947	73.8243	-22.4083	-31.642	89.1863	12.5095	-60.2527	19.3064	16.0122	75.0509	39.2661	-103.64	-65.8735	-11.4135	118.281	37.1979	-6.54053	14.5635	-21.5719	21.9038	8.80811	27.3066	31.1666	17.2949	-28.1284	109.446	51.9626	-70.2268	8.27966	55.5704	52.8007	37.286	33.8611	-118.822	18.2139	5.12341	-74.385	58.7018
47.9031	41.7163	-39.1129	10.2786	16.9667	14.1356	-14.0477	14.0647	21.6011	-14.8733	-42.3333	46.9558	74.3561	-21.4739	-33.0157	88.8094	12.2866	-58.9442	18.5869	16.2843	75.1616	38.4397	-103.161	-65.0516	-12.1525	118.391	37.9529	-5.58142	12.6642	-21.2019	22.4175	7.79431	28.6232	30.7327	17.807	-28.3508	107.907	52.4147	-70.5276	8.63428	55.9082	54.0947	37.3922	34.5403	-119.709	17.6339	5.08301	-74.8435	58.2352
47.4498	41.3525	-39.0729	10.8546	17.9349	14.708	-12.8436	14.2983	21.6248	-15.1299	-43.0721	46.25	75.2255	-20.5656	-33.5032	87.9209	11.6129	-57.6041	17.3851	16.5693	75.14	37.9973	-102.482	-64.563	-12.7937	118.707	39.1119	-5.32312	12.0406	-20.6263	22.9142	6.51648	29.2092	30.235	18.6233	-28.5415	106.495	53.4426	-70.2753	8.73608	56.1478	55.4709	37.4716	34.4196	-120.099	17.3962	5.18298	-75.2188	57.9532
46.5054	40.9126	-38.8525	11.1532	18.6898	15.4691	-12.4425	15.2004	21.576	-15.5107	-43.1863	45.8401	75.9935	-19.4707	-33.8641	87.1169	11.1388	-56.9836	16.8828	17.2443	75.1329	37.9507	-101.715	-64.1654	-13.0894	119.087	40.3319	-4.95837	11.4117	-20.5912	22.6875	6.14685	29.3239	30.0326	18.5549	-28.4117	105.703	53.9596	-69.7346	8.78003	56.6494	56.2825	37.6848	34.8032	-121.361	17.0616	5.24951	-75.1366	57.1678
46.4226	40.5582	-38.8583	11.5763	19.3474	15.9576	-11.9589	15.5642	21.6249	-15.8486	-43.5834	45.4999	76.4458	-18.6666	-33.3776	86.4916	10.4249	-56.3693	16.5221	18.2814	75.4504	37.6316	-100.718	-63.8657	-13.3657	119.734	41.2007	-3.81836	10.6996	-20.5531	22.1868	5.55139	29.7377	28.5927	18.6531	-28.3898	104.062	55.6725	-68.0242	8.24438	56.855	56.4447	37.6599	35.1543	-121.695	16.5182	5.13428	-75.0328	56.6396
46.5447	41	-38.8311	12.1522	20.4369	16.4751	-10.0184	16.505	21.5621	-16.0251	-43.8529	45.0518	76.9781	-18.2421	-33.3685	86.1549	9.88794	-55.715	16.7208	18.5117	75.5725	37.1299	-101.364	-63.8911	-13.5913	120.144	41.8877	-3.33191	9.45056	-20.6649	21.6604	4.80884	30.1686	26.6552	19.0034	-28.6222	103.281	56.2457	-65.6704	8.0957	56.7743	56.7534	37.6041	35.0575	-121.022	16.5378	5.14917	-75.0471	56.1948
45.9731	40.3199	-38.8674	12.8231	21.6503	17.2102	-9.54358	16.9969	21.4332	-16.0275	-44.5094	44.5027	77.6183	-18.1432	-33.2313	86.0865	9.18909	-55.0469	16.8755	19.3667	75.5798	36.3784	-101.692	-62.9362	-13.6896	121.235	42.1801	-2.422	8.5658	-20.8822	21.8405	4.32202	30.8396	25.9814	18.9784	-29.188	102.793	57.6821	-63.5056	8.28625	56.7732	58.0931	37.4413	35.2942	-120.876	16.5323	5.19849	-75.0659	55.173
45.6174	39.8612	-38.8995	13.3378	22.2128	18.0584	-9.12146	17.2124	21.4386	-16.0426	-45.2954	43.9987	77.2878	-18.2948	-33.5803	86.1671	8.06323	-54.3839	17.0242	20.5584	75.6785	35.7722	-101.637	-62.4777	-14.007	122.089	42.6842	-1.77319	7.3728	-21.4471	21.7109	4.13452	31.0482	24.8597	18.8457	-29.4139	101.838	59.3569	-61.6749	8.77893	56.9004	60.1829	37.5761	35.4557	-120.579	16.5608	5.22998	-75.2577	54.9792
45.8672	39.3682	-39.0673	13.8374	22.9375	18.4542	-8.87268	18.1768	21.4183	-15.7524	-46.1855	43.1259	77.0692	-18.2532	-33.574	85.9959	7.4248	-53.8964	18.0071	20.7568	75.6747	35.3463	-101.713	-60.1995	-13.9128	123.047	42.8794	-1.23596	7.04858	-22.2341	21.735	4.39575	31.4542	22.8372	18.9757	-29.6364	101.724	59.9243	-60.7125	9.125	57.1248	60.7687	37.7979	35.9103	-120.738	16.4501	5.01074	-74.6863	54.9879
46.9819	39.0514	-39.0712	14.3719	23.97	18.4287	-8.83826	19.1981	21.3531	-15.0326	-47.3529	42.1598	77.0518	-18.2794	-33.6979	85.9177	6.9978	-53.4458	18.594	22.1891	74.9058	35.38	-101.044	-59.3997	-14.0587	123.958	42.7212	-0.473022	7.26941	-22.6929	21.4392	4.62366	31.9904	21.0889	18.8938	-30.24	101.195	60.7363	-59.7799	9.1145	57.3154	60.7877	37.6272	36.1731	-120.466	15.9978	4.84668	-73.5541	54.6176
47.7743	38.8596	-38.4854	15.1064	25.5571	18.4734	-8.63416	19.7827	21.4309	-14.3577	-48.2428	40.738	76.9911	-18.4492	-33.9124	85.9369	7.62122	-53.2887	19.4513	22.9479	74.7587	35.3096	-100.437	-58.507	-14.2318	125.254	42.2094	0.758789	7.34717	-22.9744	21.2891	4.60583	32.1488	19.958	18.7743	-30.72	100.489	61.2797	-57.6917	9.08997	57.3555	60.6993	37.3605	36.7736	-120.094	15.9532	4.66858	-71.9547	54.4486
48.2542	38.6699	-37.9285	15.858	26.2698	18.4972	-8.72131	20.563	21.3656	-14.0123	-49.5607	40.2408	77.04	-18.4741	-34.1205	86.5876	8.39294	-53.0902	20.4132	23.9062	73.6067	35.2018	-100.036	-58.8018	-14.2749	125.965	41.4102	0.95752	7.40527	-23.6295	21.2424	4.54651	32.0345	19.1591	18.6438	-31.5917	100.003	61.5732	-57.0555	9.37354	57.5625	60.3824	37.1127	37.9048	-119.446	16.0323	4.93726	-71.2258	54.0458
48.3558	38.5519	-37.4611	17.1748	26.8257	18.4919	-8.96521	21.3705	21.1073	-13.7183	-50.1927	39.7026	77.6792	-18.4668	-34.2578	87.1627	9.13477	-52.8942	20.8527	24.8333	72.9661	35.2383	-99.693	-59.1158	-14.2141	126.666	40.915	1.11218	7.55762	-24.2155	20.9447	4.74939	32.0782	18.1378	18.3976	-32.4857	99.6296	61.6143	-58.0792	10.0345	57.5431	60.5247	36.6796	38.6991	-118.645	16.0398	5.23523	-70.2847	53.4479
48.4492	38.3427	-37.2046	17.7094	27.9985	18.1932	-9.35828	21.7991	20.2543	-13.2119	-50.5032	38.2859	78.1934	-18.4775	-34.2661	87.7236	9.34229	-52.5334	21.4808	25.4471	71.3783	35.1976	-99.4039	-59.2863	-14.1209	128.202	40.5095	1.40625	7.55005	-24.6913	20.9523	5.08191	32.1199	17.0264	18.0665	-33.4069	99.0261	61.5455	-58.5923	10.2505	57.7344	60.8138	36.1455	38.8176	-118.11	15.8823	5.19165	-69.7609	52.8096
48.5205	38.0806	-37.0358	18.1881	29.1633	17.9578	-9.40356	22.6978	19.4572	-12.8685	-51.1748	36.4688	78.5272	-18.5206	-34.249	88.4235	9.32971	-52.4121	21.9983	26.2958	69.8824	35.0376	-99.3563	-59.9857	-13.771	128.971	40.3933	1.49536	7.5509	-25.769	20.2401	5.0769	32.1279	15.5754	18.3971	-34.1465	98.6709	61.84	-59.0936	10.5724	57.9783	61.0037	36.4552	39.5139	-117.741	16.0825	4.81909	-68.9694	52.3264
48.6166	37.8264	-36.0443	19.1539	30.0363	17.8109	-9.83435	23.1989	18.4396	-12.9348	-51.8848	35.9462	78.8975	-18.6074	-34.1434	89.6526	9.2771	-52.4165	23.1635	27.1888	68.6812	33.7091	-99.5577	-60.4355	-13.6051	129.441	40.3879	1.67163	7.60254	-25.9097	19.8044	4.30579	32.2366	14.7211	18.986	-35.3962	98.3584	61.9272	-58.5626	11.1163	58.3937	61.7384	37.4653	40.6755	-116.912	16.3549	4.93726	-68.3335	52.1117
48.6639	37.7422	-34.6877	19.7831	30.9049	17.5006	-9.9939	23.8822	17.6278	-12.9254	-53.4503	34.9429	78.9065	-18.9016	-34.0873	91.2329	9.1925	-52.6354	24.0117	27.8236	67.7437	33.11	-99.8654	-61.2402	-13.1692	130.228	40.5785	1.9906	7.57922	-26.0189	18.9413	4.19788	32.2943	13.4836	20.0487	-36.3187	98.0358	62.0896	-58.5582	11.9937	58.9576	62.0187	37.8036	41.6499	-116.006	16.3267	5.08203	-67.9962	50.7014
48.6208	37.6482	-33.7666	20.2865	31.9017	17.3158	-10.3647	24.1106	16.9977	-12.9058	-54.0922	34.5466	78.8563	-19.0033	-33.7272	92.3436	9.1156	-52.7816	24.0699	29.1291	67.2582	32.8015	-100.352	-62.0297	-11.4646	130.757	40.464	2.38025	7.75452	-26.2234	18.2546	4.04492	32.3562	12.4336	20.412	-37.6786	97.8057	62.3304	-58.4768	12.9573	59.3665	62.0071	37.5131	41.899	-115.767	16.1373	5.40051	-67.4634	50.0626
48.6443	37.4655	-33.4369	21.4683	32.6024	17.3593	-10.7205	24.257	16.4088	-12.9044	-55.0529	33.3881	78.6211	-19.045	-33.5137	93.0425	9.17249	-52.894	23.8668	29.7762	66.5201	31.7523	-100.885	-62.5186	-9.81091	130.912	39.9351	2.37109	7.60632	-26.6556	17.7673	3.91577	32.5576	10.724	21.0597	-39.168	97.4993	62.4906	-58.0391	14.0125	60.1006	62.2577	37.145	42.1902	-115.556	15.7386	5.18225	-67.1704	49.7743
48.6407	37.1486	-33.6724	22.4402	33.129	17.416	-11.0593	24.3782	15.5345	-12.8474	-55.4911	33.0242	78.4453	-18.9751	-33.1005	93.9276	9.14673	-53.0669	23.8425	30.5011	65.1725	29.7108	-101.505	-63.1376	-9.13159	131.271	39.1479	2.61658	7.45703	-27.2505	16.6816	3.75928	32.8801	9.46509	21.7845	-40.8794	97.35	62.9513	-57.2433	14.5114	61.5227	63.2926	36.7899	42.5997	-114.537	15.3997	6.12036	-67.5206	49.5109
48.6346	36.8596	-33.8348	23.639	33.4144	17.5923	-11.2516	24.5947	14.6648	-12.9181	-56.0677	32.9805	78.181	-18.6282	-32.6981	95.6345	8.90356	-53.1138	24.1758	31.1774	64.0264	27.8298	-102.202	-63.5372	-8.05249	131.838	38.4711	2.65515	7.16516	-27.9016	15.7543	3.67651	33.1479	7.93958	22.0579	-42.2892	96.4729	63.2054	-57.0303	15.4423	62.2578	65.0201	36.4348	42.4991	-113.365	15.041	7.10425	-67.5531	49.2581
48.6582	36.828	-33.8064	24.3845	33.4055	17.5127	-11.4594	24.4745	13.8794	-13.0094	-56.522	33.0455	77.4679	-18.0767	-32.0697	96.3604	8.82642	-52.5792	24.2478	31.4059	62.1283	27.2345	-102.78	-63.9507	-7.31885	132.059	38.0811	2.43347	7.24011	-29.1291	15.1196	3.95349	33.272	6.98633	22.9427	-42.8978	95.6476	63.6389	-56.6943	16.2047	62.9622	65.6116	36.2294	43.0759	-112.27	14.9785	8.3728	-67.4722	48.4164
48.6632	36.5127	-33.9501	24.6998	33.2589	17.4841	-11.1492	24.6344	13.298	-13.2764	-56.9902	32.9323	77.1364	-17.5433	-31.8341	97.5966	8.97791	-52.7531	23.848	32.3817	61.4232	26.584	-103.176	-64.5967	-7.70544	132.434	37.797	2.21814	7.1283	-30.1011	14.5604	4.37097	33.6064	6.27539	23.6525	-43.0924	94.663	64.0442	-55.8109	17.0461	63.3524	65.558	35.6743	44.4792	-110.953	15.3068	9.5509	-67.6382	48.0048
48.6232	36.1252	-34.0297	25.718	33.3711	17.7147	-11.2761	24.8301	13.0114	-13.3446	-57.7056	33.1409	76.739	-16.9362	-31.2106	98.2665	9.63	-52.3142	23.8501	33.0646	59.8384	25.88	-103.464	-64.8529	-7.82654	132.551	37.665	1.74927	6.90503	-31.1593	13.9657	4.57642	33.8262	5.04724	24.1359	-43.7198	94.0026	64.6737	-55.4678	17.9492	62.8799	64.8875	36.4514	46.1299	-108.609	15.7012	9.98999	-67.1699	47.5961
48.6609	35.9318	-34.2632	26.423	33.4717	17.7919	-11.9127	25.0107	13.1959	-13.5426	-58.3013	33.1854	76.1285	-16.4961	-30.9678	98.5253	10.1442	-51.222	23.6836	33.6672	58.6084	25.4419	-103.929	-65.3816	-8.2439	132.806	37.5221	1.06714	6.35986	-31.9556	13.3121	4.54504	34.2085	4.0293	24.772	-44.3519	93.4452	65.0853	-55.3975	19.3619	62.465	64.006	35.9081	46.7029	-107.253	16.2079	11.6801	-66.4907	47.3191
48.6592	36.2704	-34.1481	27.4387	33.6531	17.6997	-12.3832	25.0511	13.4684	-13.9362	-58.7371	33.7147	75.2328	-15.6465	-30.2838	98.2385	11.1499	-50.3116	23.5612	35.3679	57.321	25.1307	-104.218	-65.7498	-7.85229	132.759	37.4568	-0.109863	5.52087	-32.3978	12.6417	4.71838	34.4459	2.45508	24.9056	-45.2004	94.2148	65.6167	-55.3044	20.1738	62.1805	61.7144	36.0562	46.986	-106.664	15.9347	12.9807	-65.5413	46.9497
48.662	36.4203	-33.9188	28.3411	33.9373	17.4227	-12.8995	25.1489	13.4905	-14.1918	-58.7589	33.9965	74.3062	-14.9025	-30.067	96.8828	11.7621	-49.6758	23.4436	35.2668	56.4559	24.6444	-104.688	-65.8997	-7.78296	132.729	37.3729	-0.465698	4.93384	-33.0377	12.0148	4.89795	34.7107	0.985962	25.406	-45.8052	95.064	65.9022	-55.2438	21.6097	61.3196	60.8657	36.9495	47.6664	-106.012	15.7915	13.494	-64.0361	46.501
48.6188	36.7507	-33.3722	29.3484	34.4552	17.3483	-13.1714	25.0598	13.2593	-13.8369	-58.5897	34.5004	73.9442	-14.5067	-29.8992	95.1232	12.2358	-49.649	23.4318	37.2869	55.6129	23.8025	-105.367	-65.8735	-7.89209	132.829	37.2649	-1.02014	4.01685	-33.5804	11.3176	5.56763	34.927	0.631348	25.6882	-46.3745	96.1243	66.8385	-55.1234	22.689	61.3627	59.8688	37.3923	48.1986	-104.788	16.0214	13.7058	-63.6003	45.525
48.6481	37.0779	-32.955	29.9314	34.9838	17.3153	-13.1135	24.8495	12.5831	-13.4376	-58.6556	35.1376	73.7819	-14.0289	-29.7871	93.8982	12.8484	-50.278	23.3877	37.842	54.2446	23.4854	-105.755	-65.8014	-8.16541	132.619	37.1925	-2.2489	3.52771	-34.7329	10.8627	6.2793	34.9382	-0.651611	26.1619	-47.4634	98.1934	67.6455	-55.1041	23.5782	61.8821	59.5358	37.9937	48.5282	-103.237	16.007	13.8267	-62.7645	44.9514
48.6367	37.4893	-32.0104	30.3057	35.1718	17.4324	-13.1416	24.4312	11.3612	-13.1836	-58.8098	35.86	73.2947	-13.127	-29.5334	92.6504	13.9596	-50.6909	23.2953	38.9299	53.6182	23.3124	-106.229	-65.6627	-8.36475	132.411	37.2444	-3.07776	3.1604	-35.4027	10.6812	7.07227	35.0673	-1.88928	26.9104	-49.0136	98.6729	68.3081	-55.1794	23.5027	61.9547	59.7156	37.9089	49.1846	-102.339	15.3706	12.0867	-62.4366	44.777
48.6335	37.8958	-30.7506	30.0214	35.6736	17.3877	-13.199	23.9716	10.4866	-12.6547	-58.7148	36.1425	72.4893	-12.8606	-29.2576	91.5834	15.1224	-51.153	23.3423	40.1805	53.1078	22.9896	-107.259	-66.1099	-8.24634	132.233	37.2655	-3.90344	2.8147	-35.6721	10.2007	7.56091	35.8754	-3.16382	27.1902	-50.0468	99.9535	69.3937	-55.4398	22.208	62.6272	59.8276	38.0908	49.7805	-101.229	15.3921	10.9032	-62.2612	44.39
48.6334	38.4515	-30.0356	30.6296	36.14	17.2184	-13.6659	23.657	9.75146	-11.8757	-58.6731	36.479	71.9121	-12.4944	-29.1001	90.5731	15.7843	-52.2604	23.5157	41.4106	52.1919	22.4276	-108.118	-66.8301	-8.17188	132.481	37.4399	-4.36523	2.2251	-36.5894	9.63965	7.95972	36.3583	-4.76538	27.3256	-51.7614	99.3933	70.2666	-55.9	21.3942	62.631	59.8776	38.0646	48.9315	-100.7	15.0776	10.1726	-62.2834	44.3312
48.5873	39.3325	-28.094	31.4844	36.4965	17.1134	-13.9832	23.4924	8.88831	-11.5106	-58.6167	36.8219	71.5149	-11.5211	-28.9493	89.4259	16.6075	-54.2551	23.4915	42.024	51.8567	22.1367	-108.792	-67.9799	-8.07031	132.973	37.4354	-5.43677	2.06091	-38.2798	9	8.87439	36.4265	-6.04773	27.3993	-53.3614	98.887	72.0166	-56.2598	21.0693	62.762	59.9744	37.9824	48.7574	-99.6133	14.967	10.0277	-62.4076	43.8872
48.4026	39.6715	-27.0664	31.7905	36.8499	16.9882	-13.3566	23.9955	7.43262	-11.2054	-58.6946	36.8114	70.8882	-10.4841	-28.6031	88.6782	17.7461	-54.8585	23.5933	42.6631	51.5056	21.965	-109.738	-68.849	-8.17102	133.434	37.5507	-5.27344	2.17224	-40.6777	8.47595	9.8075	36.2111	-5.0835	27.2762	-55.5249	98.6755	73.116	-56.7653	21.1763	63.3594	60.1576	37.9044	48.3369	-98.4015	14.7971	9.62756	-62.6456	43.579
47.9966	40.6593	-25.7289	32.6643	37.313	17.0006	-12.7097	24.4995	6.60413	-11.0074	-59.1022	36.7023	70.5674	-9.51489	-28.5781	87.0841	18.3136	-56.3925	23.9933	43.452	51.0963	21.8557	-110.774	-69.5087	-8.73022	134.204	37.6771	-4.74841	2.4386	-41.7555	8.16418	10.0116	36.2532	-4.50049	27.3345	-56.3444	97.9938	73.9482	-57.8146	21.6351	63.1442	60.3959	37.9958	47.9727	-97.5081	15.0239	9.15295	-62.7301	43.361
47.7821	41.4401	-24.115	33.5823	37.766	16.9215	-11.884	25.1782	5.11377	-10.8309	-59.3365	36.2332	70.4252	-8.93677	-28.5198	86.6976	18.5748	-57.6323	24.1611	44.4935	50.5854	21.6987	-111.697	-69.9647	-8.97253	135.238	37.6213	-4.79651	2.26123	-42.4047	8.03552	11.1863	36.428	-3.82446	27.403	-58.3597	97.6697	75.5684	-57.984	21.7858	63.6243	60.5681	38.0049	47.4797	-96.7249	15.0723	8.64111	-62.9275	42.8024
47.3064	41.8539	-23.0774	34.4279	38.1882	16.6771	-11.3763	25.869	4.026	-10.5573	-59.5387	35.4128	70.1086	-8.4718	-28.4601	86.0859	18.4883	-58.6924	24.6315	45.2169	50.4366	21.3975	-112.641	-70.4752	-9.02283	135.571	37.4846	-4.80261	2.22205	-44.0652	6.60205	12.2644	36.4108	-4.58838	27.5062	-59.459	97.0599	76.493	-57.4058	20.7899	64.0116	60.5773	37.8073	47.101	-95.3077	13.9498	8.16553	-63.132	41.9862
47.114	41.9103	-22.1587	35.2253	39.0402	16.2708	-10.766	26.2415	2.01611	-10.3383	-60.0778	34.5021	69.8101	-7.80481	-28.1949	85.2805	18.6394	-59.973	24.7233	46.67	50.1698	21.4248	-113.728	-71.8009	-8.78442	136.213	37.2831	-4.69189	2.2395	-45.13	5.31641	13.7168	36.1171	-5.70154	27.4828	-61.8365	96.9288	77.5225	-57.8564	18.2838	64.1812	60.5428	37.3898	46.9268	-94.3108	12.7682	7.87598	-63.1051	41.2896
47.1394	42.6207	-21.4888	35.9551	39.5946	16.2833	-10.5311	26.4408	1.45837	-10.3281	-60.3842	33.6354	69.722	-7.6001	-28.0164	84.829	18.8346	-61.2216	25.064	47.7758	49.9993	21.3384	-114.837	-72.6709	-8.58411	137.992	36.8872	-4.76904	2.9989	-46.2219	4.2644	14.2223	36.0193	-7.05078	27.4403	-62.8478	96.5524	77.9092	-58.5463	18.2556	64.0547	60.5166	36.885	46.5253	-94.5341	11.9094	7.79517	-62.8889	40.6541
46.7448	43.2111	-20.5063	36.7802	39.968	16.1195	-10.0284	27.0745	-1.4563	-10.3084	-60.6111	33.0088	69.7843	-7.04175	-27.5386	83.7675	18.7822	-62.2338	25.8766	47.6222	50.1042	21.2891	-116.363	-72.7556	-7.83325	138.621	37.0366	-4.552	3.89746	-48.0743	3.84644	14.4435	36.1377	-7.42773	27.2181	-63.8979	96.6266	78.8118	-59.2705	18.5532	64.6797	60.7745	36.5604	46.1549	-93.2428	11.2366	7.75916	-62.7461	40.3973
45.4727	43.8654	-19.6013	37.0088	40.3662	16.0869	-9.69617	27.7699	-2.50574	-10.4083	-60.8582	32.0476	69.7987	-6.7334	-27.446	82.949	18.834	-64.5709	27.886	46.9894	50.2305	21.4757	-117.457	-73.9999	-6.11572	140.398	36.4314	-4.33923	4.30652	-49.5533	3.38831	15.6521	36.1138	-7.72583	27.0504	-64.8621	96.9416	79.6321	-59.441	18.4142	62.8744	60.7626	35.9557	45.8804	-92.6647	10.5818	7.91675	-62.9445	40.3077
45.0262	44.1909	-18.9894	37.423	40.7295	15.9482	-9.42993	28.6151	-3.52454	-10.3595	-61.1934	31.088	69.9023	-6.35791	-27.0854	82.3589	19.0255	-65.2697	28.7651	47.8387	50.0365	21.5764	-119.231	-75.465	-4.86267	140.774	35.8339	-4.61108	4.49707	-51.9182	2.52026	16.6621	35.2362	-8.24841	26.739	-65.8425	97.2305	80.1251	-59.5759	18.4072	61.6415	60.7515	35.7474	45.7893	-93.3606	9.40576	7.79712	-62.6481	40.1671
43.7273	44.722	-18.3475	38.2988	41.4321	15.7623	-9.4032	29.1909	-4.07251	-10.0862	-61.3141	30.5972	69.8923	-5.1344	-26.3657	82.3202	19.5098	-66.3424	28.9087	48.6638	49.501	21.5309	-120.754	-76.4581	-4.69421	142.539	35.5216	-4.93213	5.1261	-52.7306	0.524658	17.6307	34.8108	-9.20422	26.4938	-67.8018	98.1128	81.2147	-60.13	18.2548	60.6495	60.7346	35.7345	45.6769	-94.2148	8.1333	8.21423	-62.4607	39.7802
43.2371	45.3524	-17.8499	38.3688	42.1758	15.3917	-9.66858	29.6367	-4.49194	-9.7887	-61.4135	29.9246	69.8373	-4.15442	-25.6859	82.7343	19.725	-67.2456	29.2699	49.3497	49.2622	21.4237	-122.622	-77.2347	-4.01379	143.252	34.9535	-5.12842	5.80334	-54.1561	-0.378784	18.0267	34.0801	-10.5264	26.4674	-69.9229	98.7395	81.8064	-60.5437	17.6913	60.7003	60.832	35.8145	45.521	-94.2347	7.55054	9.73389	-62.4877	39.4313
43.1324	45.605	-17.4683	37.5222	42.4984	14.8605	-9.81213	30.0905	-5.41956	-9.27612	-61.4572	29.531	69.7952	-3.94141	-25.2562	82.7728	19.7174	-68.2339	30.0359	50.3737	49.3173	21.1373	-122.734	-77.5521	-2.69995	143.561	34.2294	-5.85559	5.98621	-55.3239	-1.14612	18.3191	33.266	-11.1665	26.8256	-70.59	99.7252	82.1565	-61.2446	16.6719	61.3862	60.9226	35.6541	45.3884	-93.6851	6.95886	11.2042	-61.7471	39.1742
42.3887	45.8551	-16.9722	37.116	43.3182	14.6002	-9.87695	30.3173	-5.88464	-8.47449	-61.3521	29.2584	69.6902	-3.60571	-24.7906	82.6378	19.1252	-68.3929	31.1754	51.2357	49.0428	21.6063	-124.281	-77.8206	-1.63867	143.454	33.519	-6.39685	6.58813	-56.4768	-2.62183	18.9095	32.4298	-11.9065	27.551	-71.4519	99.9689	83.0521	-62.6089	15.7277	61.4266	60.6447	35.1057	45.1125	-92.8813	6.67334	11.7572	-60.7173	38.5983
41.8413	45.9647	-16.0387	35.6581	43.7113	14.4717	-9.9281	30.3143	-6.21631	-7.48193	-61.0239	28.9959	69.4597	-2.91309	-24.0686	82.1729	18.7661	-68.8413	31.8315	51.5671	48.8765	21.9933	-126.117	-78.7961	-0.700073	143.838	32.6544	-7.30615	7.33191	-58.0178	-3.74976	19.7581	32.3527	-12.6294	27.9954	-73.4371	100.319	84.0035	-62.6101	14.3982	61.7646	60.3284	35.2115	45.5885	-91.6854	6.16125	12.1185	-60.2542	37.933
41.0073	46.0177	-15.3582	35.0566	44.1532	14.2465	-9.59155	30.1953	-6.33032	-6.98669	-60.1829	28.7982	69.2622	-2.44763	-23.4192	81.8046	18.213	-69.4065	31.9465	52.1631	48.0182	21.5026	-127.245	-79.9945	-0.0319824	142.88	31.5304	-7.73376	7.39917	-60.4734	-5.51221	20.8484	31.6168	-13.2965	29.1345	-75.7091	100.65	83.791	-63.7612	13.0525	61.5807	60.384	35.1725	46.4822	-90.9182	5.76794	12.8077	-60.1107	36.8108
39.6647	45.8916	-14.8381	34.4814	44.7616	13.5892	-9.62964	29.9357	-6.0321	-6.59033	-59.4434	28.7029	69.027	-2.32117	-22.9149	80.5046	17.9926	-69.9413	33.1057	53.4851	47.9226	21.0664	-128.058	-80.3687	0.508423	141.279	30.8334	-8.07019	7.15332	-61.1522	-6.35107	21.5247	30.6985	-14.6189	30.274	-76.5963	101.128	83.6097	-64.6688	11.6296	62.2753	60.3108	35.0321	47.1984	-90.5559	5.45483	13.6663	-58.8239	36.7968
39.0573	45.4215	-14.115	33.7415	45.1328	13.0413	-9.61182	29.799	-5.52332	-6.26709	-58.9669	28.9657	68.97	-1.82007	-22.2432	79.694	18.0104	-70.7267	33.7668	53.8563	47.9247	20.9309	-129.072	-79.1387	1.33252	140.197	29.8075	-9.05872	7.10779	-62.9919	-6.67297	22.0061	30.0642	-16.5206	31.1603	-76.4956	101.581	83.7004	-65.7161	10.4362	62.8049	60.3987	35.129	47.6467	-90.4408	4.95459	15.7974	-57.6383	36.4862
38.6542	44.9014	-13.6699	33.1023	45.2258	12.6036	-8.64368	29.9102	-4.74866	-5.97632	-58.569	29.1384	68.7791	-1.44348	-21.5316	79.0441	18.1523	-71.161	34.01	54.4354	47.9258	20.8462	-129.801	-78.4857	2.07922	139.401	28.8967	-10.136	7.04382	-64.7827	-7.19189	22.5066	29.1575	-17.2106	31.7943	-77.2545	101.694	83.8237	-66.6403	10.2075	62.2622	60.6906	35.1046	47.5436	-90.6919	4.11865	16.9292	-56.8649	36.2498
38.0369	44.6437	-12.594	31.7075	45.2743	12.1985	-7.7655	29.9978	-3.8833	-5.2251	-58.1655	29.4377	68.3615	-0.991943	-20.7191	76.9175	17.9803	-71.4253	34.8799	54.9352	47.6841	20.8003	-130.635	-78.4565	2.59607	138.945	28.983	-10.6475	7.28577	-65.8766	-7.77332	23.3524	28.7871	-17.3295	32.2671	-79.6111	101.357	84.1189	-67.9324	9.45459	63.6444	61.1787	35.0574	47.3119	-90.8698	2.95068	17.6838	-55.7717	35.3578
37.8213	44.4274	-11.6083	30.6316	45.2032	11.9338	-7.72412	30.1967	-3.02698	-4.85706	-57.2583	29.3259	67.847	-0.462158	-20.1056	75.634	17.8804	-71.7518	36.223	55.124	47.7841	20.9551	-131.814	-78.8298	2.93994	138.204	28.2173	-10.76	7.52649	-66.5938	-8.6969	24.1553	28.4453	-18.2537	32.5867	-80.8278	101.269	84.0813	-69.2227	7.99146	65.0791	61.3912	35.3372	46.9595	-90.3156	1.48914	18.5077	-53.234	34.5094
37.0958	43.8799	-10.9634	30.0375	45.0833	11.8154	-6.83496	30.7406	-2.24658	-4.41577	-56.8662	29.3608	67.4081	-0.0389404	-19.3397	74.7404	17.8534	-72.1693	37.2284	55.493	48.2904	20.7953	-133.258	-79.6354	3.0105	137.211	27.0829	-10.8663	7.57227	-67.5193	-10.0713	25.0479	28.1372	-19.9147	33.4014	-81.9087	101.55	83.8738	-69.8091	7.55103	64.8442	61.6044	35.6541	46.6683	-89.407	0.248169	19.1948	-53.2596	34.2119
36.2311	43.2802	-10.1018	29.7224	44.8475	11.6985	-6.01172	30.9624	-1.51904	-4.35498	-56.948	29.4408	67.0178	0.252075	-18.3525	73.9623	18.1331	-72.0721	37.4153	55.78	48.9728	20.5183	-134.529	-79.5054	2.95959	136.775	26.1096	-11.3127	7.71545	-68.9446	-10.8882	26.677	27.72	-21.0416	34.3271	-82.7867	101.886	84.6554	-70.7001	7.36145	65.3793	62.0072	36.7908	45.6489	-88.4332	-0.707031	19.9272	-52.7952	33.7701
36.27	42.7186	-9.07263	29.2764	44.7354	12.3451	-5.37598	31.475	-0.919678	-4.52844	-57.1577	29.4993	66.6971	0.57959	-17.9121	73.9674	18.1498	-72.5132	37.655	56.0426	49.8571	20.2434	-135.213	-79.5385	2.11707	136.075	25.6117	-12.0074	7.72278	-70.0938	-11.6873	27.8026	27.1323	-21.536	34.7572	-85.4564	101.781	85.3273	-71.3904	8.91516	65.9526	62.1089	37.3961	44.3645	-87.7013	-2.38232	21.1176	-51.1793	32.5894
35.3914	41.8876	-8.50586	28.6176	44.1606	12.8049	-4.76135	31.7759	-0.282715	-5.07825	-57.548	29.748	66.0425	0.691772	-17.0642	73.6694	18.0078	-72.6219	37.9464	55.0258	50.5933	20.0294	-135.613	-79.6173	1.67603	136.132	25.0498	-12.453	7.64331	-70.9214	-12.0223	28.6278	26.5867	-21.7772	34.9215	-87.0492	101.45	86.1624	-71.9325	10.5156	66.749	62.1167	37.8318	43.9647	-86.6245	-3.11719	22.3015	-49.5208	31.3185
33.9226	41.1659	-8.30969	27.8721	43.5002	12.9246	-3.80261	32.1558	0.258667	-4.97314	-57.958	30.0614	65.6608	0.816284	-16.3425	72.0121	17.8152	-73.0464	39.1235	54.3218	51.835	19.8049	-136.597	-79.9496	0.977661	136.316	24.8676	-12.5126	7.74255	-72.7192	-12.8438	29.876	26.6394	-22.6121	35.1384	-88.2832	101.365	86.8831	-72.902	10.5677	67.526	62.2714	37.5554	43.3792	-84.9346	-4.13574	22.1843	-48.6718	30.9534
33.1049	40.9954	-7.82727	26.9534	43.2842	13.0383	-3.40698	32.3267	0.453979	-4.63867	-58.4655	30.1376	65.4005	0.871338	-15.9946	70.9385	17.6338	-73.4271	39.9141	53.65	53.7684	19.1937	-137.569	-79.4641	0.513306	136.443	24.5807	-12.4366	7.70642	-74.2518	-14.3794	30.9438	25.6705	-23.1166	34.8167	-88.9292	101.547	87.2975	-74.5947	10.4266	68.1232	62.6938	37.184	42.6971	-83.7391	-5.36694	21.4324	-47.3503	30.6156
32.4303	40.5997	-7.50598	26.3704	42.7778	13.3988	-3.20312	32.0988	0.35022	-4.50305	-59.2509	29.9196	65.4357	0.740845	-15.4148	70.3711	17.527	-73.7823	40.4977	53.0284	54.9264	18.4221	-139.026	-78.9686	-0.452271	136.76	24.1963	-12.3207	7.73962	-74.8153	-15.1918	32.0851	24.3436	-23.6311	33.6849	-90.7449	102.104	88.9681	-75.3778	10.1541	68.2073	63.3744	37.2938	41.5074	-82.9597	-7.4585	20.3507	-46.9459	30.1686
31.7891	40.0614	-6.83887	26.6003	42.3917	14.1754	-3.047	32.0249	0.0333252	-4.16614	-59.8606	29.9779	65.8419	0.656006	-14.939	69.314	17.3561	-74.0842	41.2556	52.4226	56.3213	18.027	-139.485	-78.1488	-1.20544	136.889	23.739	-11.6364	7.97424	-75.8615	-15.6835	32.6926	23.8103	-24.3975	32.3376	-91.7329	101.856	90.7567	-75.2366	10.1003	68.3983	63.8158	36.736	41.124	-82.0895	-8.16834	19.6781	-45.7479	29.1267
31.4734	39.46	-5.89307	26.3243	42.7352	15.7357	-2.55127	31.9314	-0.409424	-4.0365	-60.2551	30.0525	66.5105	0.59082	-14.7078	67.6569	17.3335	-74.1444	41.9598	52.1738	56.9077	17.4075	-140.294	-77.4714	-1.56604	136.942	22.827	-11.1307	8.67651	-76.4453	-15.972	33.0242	24.1793	-24.9158	31.2379	-92.4762	100.668	91.6415	-76.1278	10.5396	69.0681	64.5328	36.4844	40.922	-80.5962	-10.4241	19.601	-44.4601	27.8815
30.4935	39.0388	-5.56714	26.1719	42.475	16.595	-1.00842	32.1715	-0.82312	-3.57861	-60.7065	30.0934	67.4059	0.473755	-14.3191	66.8523	16.2505	-74.4725	42.441	51.9635	57.8961	16.9326	-141.411	-77.4147	-1.79541	136.887	22.5065	-10.546	9.05359	-77.4597	-16.4384	34.1354	24.3409	-25.4276	30.0537	-93.226	99.7101	92.2134	-76.7604	11.0751	69.4445	65.5209	35.8438	40.345	-79.6671	-12.0894	19.4484	-43.5598	27.3053
30.1326	39.0571	-4.9021	25.7008	42.1021	17.8394	-0.337402	32.4771	-1.51868	-3.87366	-61.0959	29.9128	68.2279	0.583984	-13.9996	65.9124	15.1421	-74.749	43.2679	51.502	58.8684	16.1382	-141.856	-77.153	-1.74194	137.233	22.1067	-9.78088	8.8501	-78.1327	-17.1736	36.1931	23.812	-25.9702	29.3264	-94.901	98.5767	92.6298	-77.0742	11.9244	69.0742	65.7523	35.1208	39.5791	-78.5697	-13.1774	19.4005	-43.1868	26.8453
30.5989	38.2234	-4.59741	25.4449	42.4243	18.6801	-0.307373	32.7031	-1.87549	-3.9469	-61.1234	29.7941	68.8759	0.508301	-13.7388	64.8309	14.3375	-74.942	43.6283	50.8468	59.9463	14.8085	-143.36	-76.5394	-1.94678	137.806	20.5498	-9.73999	8.95752	-78.5361	-18.2709	36.7942	23.0288	-26.1825	29.3384	-95.7494	98.0077	93.3483	-77.7053	12.8821	68.0365	65.9564	35.5331	39.9797	-77.2811	-14.261	18.726	-42.1663	26.2573
32.2374	36.6687	-4.30261	25.3187	42.5575	19.254	0.427002	32.7329	-2.23755	-4.10498	-61.1285	29.7816	69.2045	0.502808	-13.9509	63.8047	13.8246	-75.1011	44.4739	50.3562	60.8964	13.788	-143.993	-75.709	-2.06982	138.796	19.642	-9.15442	9.17346	-78.7627	-18.7584	37.3886	22.1244	-26.2682	29.6886	-96.6124	97.4332	93.8943	-78.3859	13.2672	65.781	66.1196	35.848	38.8715	-75.2426	-16.9241	18.3162	-40.3749	24.6464
33.313	36.415	-3.86255	25.4512	42.8658	20.7585	0.934082	32.7393	-2.56689	-4.28113	-61.0758	29.795	68.7018	0.507568	-14.1346	62.8768	13.7281	-75.3479	45.8693	49.2604	61.3405	13.2714	-147.054	-75.1901	-2.2168	138.979	19.4109	-8.83411	9.45728	-79.1556	-19.5989	38.0713	22.027	-26.191	29.7136	-97.825	96.7422	94.1792	-79.0458	14.0115	64.8971	66.403	35.6283	37.1621	-74.7565	-18.442	19.0381	-39.4695	24.0505
33.707	36.1783	-3.64551	25.7032	42.7089	21.3766	1.41028	32.6565	-2.90039	-4.53699	-60.7504	29.7976	67.9418	0.638062	-14.7761	62.5548	12.8582	-75.7999	46.2017	48.3405	62.2655	12.9371	-148.429	-74.5602	-2.44458	139.752	18.7633	-8.8114	9.14551	-79.9856	-20.4026	39.7979	21.9531	-26.1322	29.9421	-100.958	95.8611	94.9735	-79.9502	14.891	64.2285	66.9653	35.2274	36.4856	-73.3906	-18.9761	18.861	-39.5228	23.3987
34.1429	35.8446	-3.64429	26.2761	42.1904	22.7263	2.54553	32.4299	-2.92761	-4.94873	-60.4548	29.7616	67.4087	0.714844	-15.7061	62.77	11.6901	-76.0057	47.7188	47.8549	62.8757	12.573	-148.641	-74.5742	-2.90088	140.93	17.5759	-8.42651	8.8739	-80.464	-21.0894	40.921	21.875	-25.642	29.988	-101.908	95.1073	95.7028	-79.7285	15.1796	63.9365	67.5916	34.8394	35.4325	-72.9557	-20.7673	17.6832	-39.7911	22.8887
34.3712	35.9237	-3.8241	26.2095	42.2612	24.1013	3.37	32.2245	-2.8335	-5.2301	-60.0066	29.7891	67.2125	0.967529	-16.3007	63.2991	10.3423	-76.3148	49.111	48.181	63.5574	12.3596	-150.624	-74.2268	-3.21558	141.641	17.2141	-8.25378	8.83899	-81.5919	-22.7336	41.359	21.8279	-25.194	29.6757	-102.399	93.5144	95.9221	-80.4406	15.8457	63.4133	68.2047	34.5809	36.1078	-72.3434	-23.5281	17.5342	-39.7108	22.3678
34.6836	35.8733	-3.96521	25.7148	41.7468	24.673	3.83533	31.4038	-2.52136	-5.41272	-59.6683	29.8901	67.4061	1.0813	-17.1523	63.7573	9.51013	-77.1481	49.7872	48.4661	63.8741	12.0237	-151.688	-73.9341	-3.21436	142.751	16.4331	-7.8064	9.08374	-82.1387	-23.4236	41.8976	21.6128	-24.8838	29.4055	-104.063	91.8864	96.1056	-81.3346	16.2289	62.3528	68.734	34.4161	38.1691	-71.6401	-24.7499	17.4452	-38.5105	21.0691
34.7878	35.9888	-4.05798	25.4037	41.2091	25.4324	4.06128	30.9908	-2.09277	-4.76111	-58.9669	29.8182	67.4458	1.22778	-18.3185	63.5449	8.81409	-78.215	51.0911	48.5278	64.8656	11.9156	-153.08	-73.8456	-3.25366	143.478	15.8735	-7.79529	9.43738	-83.4918	-24.4924	42.3311	21.5349	-24.4122	29.2621	-106.439	90.8132	96.802	-81.8993	16.5803	62.7697	68.9053	34.3197	40.5339	-70.7974	-24.8948	17.4109	-38.6968	20.5601
34.7948	36.2086	-4.54651	25.1144	40.1493	26.2144	4.40491	30.4829	-1.6394	-3.94421	-58.1417	29.8553	67.5249	1.72681	-19.0382	62.905	7.74927	-78.728	51.9495	48.5254	65.7776	12.1938	-154.56	-74.0481	-3.05115	143.961	15.0959	-7.77466	9.08728	-85.3373	-25.7024	42.4404	21.5032	-24.0775	29.4852	-108.095	90.1022	97.5311	-83.1456	16.814	62.717	68.8608	34.188	41.1605	-69.9091	-25.7482	17.9839	-38.604	19.8322
34.8473	36.0967	-4.80481	24.5135	38.8322	26.5179	4.50635	30.0986	-1.35645	-3.51379	-57.9438	29.8306	67.5457	2.10962	-19.9094	62.6047	6.6145	-79.3354	52.4385	48.9174	66.7279	12.3447	-155.601	-74.3307	-2.6875	144.324	14.6636	-7.84766	9.10498	-85.7622	-26.3767	42.6807	21.7106	-23.3926	29.6235	-110.056	89.1702	98.0303	-83.5167	16.9561	62.8652	68.8494	33.9839	43.1445	-69.5487	-26.661	18.0657	-38.5679	19.255
34.818	36.0232	-5.03931	24.0856	38.1595	27.391	5.03345	30.4572	-0.849121	-2.49683	-57.62	29.848	67.4617	2.24829	-20.4838	62.7965	5.65063	-79.5909	53.6266	48.9738	66.8462	12.527	-156.419	-74.6968	-2.32544	144.711	14.256	-7.85205	9.13135	-86.8832	-27.0041	43.064	21.7054	-22.5524	30.1289	-110.579	87.5701	97.85	-84.5631	16.7681	62.5023	69.2593	33.6508	43.48	-69.1144	-28.363	17.5565	-38.6484	18.6106
34.803	36.0011	-5.3396	23.8129	37.6494	27.5907	5.21814	30.3652	-0.13623	-1.98938	-57.366	29.9027	67.079	2.48877	-20.9474	62.9706	5.20227	-79.7654	54.3536	49.0197	66.697	12.905	-157.061	-74.8409	-2.07898	144.94	13.5626	-7.83435	7.98169	-87.9829	-28.3315	43.2419	21.5585	-21.9829	30.6082	-111.639	85.4115	98.4003	-85.2852	17.0273	62.6396	68.8187	33.6346	44.3103	-68.4963	-28.6642	17.2036	-38.8351	17.5531
34.7764	36.0396	-5.53345	23.8162	36.6152	26.8262	5.42395	29.385	0.349854	-1.94971	-56.812	29.8516	66.8011	3.08545	-21.3241	63.3127	5.07581	-80.2844	55.7335	48.907	66.6056	13.476	-157.781	-74.7507	-1.33215	145.49	13.2147	-8.16162	7.09998	-89.1462	-29.6029	43.3069	21.6847	-21.9459	31.2911	-112.228	84.3817	98.8065	-85.7843	17.0961	62.8085	68.8953	33.4474	44.5496	-67.8058	-28.7499	16.5439	-40.6527	16.0315
34.8418	36.2292	-5.82959	22.9364	35.6028	26.973	5.56763	28.6832	0.524292	-2.23853	-55.7485	29.7386	66.5295	3.9585	-21.7333	62.7269	5.44641	-80.0837	56.0496	49.035	66.6371	14.1865	-158.972	-74.5171	-0.722046	145.923	13.0355	-8.41357	7.19324	-89.979	-30.4198	44.2364	22.1162	-22.3727	31.6531	-112.962	84.0638	99.1907	-86.5179	17.4509	62.5016	68.2941	33.1853	45.8171	-66.8267	-29.1913	16.2643	-41.7323	15.2333
34.7979	36.7588	-5.83557	22.4792	34.6987	27.416	5.80017	28.538	0.481934	-2.57922	-55.5583	29.5211	66.3323	4.48535	-22.0004	62.1635	6.43152	-80.0374	56.9866	49.9323	66.4558	14.5428	-159.762	-74.4586	-0.563354	146.296	12.3391	-8.60022	6.99976	-91.0786	-31.98	44.5558	22.9272	-22.5664	31.833	-113.971	82.4368	98.8978	-86.9618	17.4099	62.4501	67.0056	32.8265	45.2019	-66.2516	-29.7028	15.8188	-42.621	14.3217
34.5833	36.9325	-5.89795	22.2076	33.5294	28.1693	6.44202	28.5037	0.608154	-2.65747	-55.2545	29.5588	66.0942	4.66406	-22.2177	62.0338	6.448	-80.1747	58.4489	50.5908	66.1216	14.967	-160.508	-74.3883	-0.5177	146.596	11.6291	-8.65161	6.51575	-91.8889	-32.5475	45.2576	23.5582	-22.5511	32.4664	-114.974	81.379	98.5704	-87.9183	17.4098	62.5243	66.1788	32.4423	45.3746	-65.6471	-30.3358	16.0706	-43.4526	13.8077
34.1807	37.2074	-6.01282	21.7181	32.8822	28.5948	6.78455	28.5001	0.531372	-2.99084	-55.2271	29.5664	65.5836	5.43933	-23.5775	61.8741	5.90088	-80.0555	59.423	51.0842	65.3776	15.7383	-161.625	-74.5851	-0.591064	146.674	11.374	-8.86987	6.3208	-93.1354	-33.515	46.5717	24.061	-22.3823	32.8745	-115.524	80.6121	98.1317	-88.6215	17.5834	62.5906	65.4817	32.2788	45.3103	-64.9703	-31.343	16.3502	-43.8019	12.5012
33.8623	37.2288	-5.95166	21.2667	31.3644	29.4501	6.73438	28.6932	0.685303	-3.09143	-55.051	29.6387	64.7836	6.32019	-24.4305	61.7433	5.7887	-80.0138	60.1141	50.9934	64.9043	16.54	-163.38	-74.8951	-0.627808	147.166	10.3101	-8.8689	5.8114	-94.0443	-35.4185	47.8284	24.4783	-21.2634	33.0935	-116.785	80.5535	98.0132	-88.7944	17.7898	62.8152	65.3916	32.0037	45.3444	-63.7953	-32.6095	16.4966	-44.4611	12.3007
33.4565	37.4675	-6.06897	20.6261	31.0565	29.9232	6.9469	29.0371	0.722534	-3.07764	-54.661	30.0771	64.4551	6.71802	-24.7465	61.5413	5.75354	-80.2347	60.6658	51.6825	64.5985	17.1094	-164.344	-75.2076	-0.802124	147.26	9.43335	-8.68506	5.50024	-94.6837	-35.7521	48.6975	25.1803	-19.8727	33.1857	-117.948	80.2267	96.9697	-88.9578	17.8275	62.7968	64.0048	31.7913	45.4792	-62.9934	-33.4844	17.0889	-44.9574	11.5974
32.7246	37.4645	-6.0769	20.1251	30.0159	30.2717	6.95215	29.2451	0.538452	-3.05505	-54.5945	30.355	63.4772	7.33911	-24.9927	61.3958	5.8844	-80.5834	60.9313	53.2983	64.0225	17.8323	-165.498	-75.6262	-0.61438	147.833	8.58765	-8.89331	5.50488	-95.0187	-36.7712	49.5583	25.7501	-19.0065	33.0485	-118.421	79.975	96.3782	-89.3661	17.8679	62.76	62.1846	31.7061	46.144	-62.6198	-34.308	17.1312	-45.0419	11.0826
32.7825	37.4277	-5.9325	19.5394	29.5579	30.4353	6.5177	29.5723	0.345337	-2.5509	-54.616	31.0729	63.3239	8.05261	-25.0782	61.4193	6.00012	-80.9303	60.97	54.7264	63.7773	18.8608	-166.139	-75.9865	-0.308838	148.423	7.58521	-8.97119	5.28821	-96.098	-37.1284	49.7542	26.2443	-18.2394	32.7062	-118.515	79.9255	95.7534	-89.4395	17.802	62.735	61.6384	31.6676	47.6594	-62.1967	-35.6229	17.2664	-45.2128	10.9565
32.0074	37.8436	-5.9137	19.0162	29.3796	30.4592	5.77173	29.1539	0.200806	-2.0968	-54.8334	31.4253	63.6436	8.97693	-25.0531	60.771	5.92151	-81.3862	61.9042	55.4172	63.3519	19.6056	-166.698	-76.2571	-0.360352	149.453	6.63452	-8.94824	5.18665	-96.9741	-37.3964	50.2974	26.2076	-16.9286	32.5283	-118.7	80.1116	95.0651	-89.5128	17.8485	62.616	61.0625	31.6279	49.2343	-61.3153	-36.0465	17.1591	-44.9279	10.7686
31.4265	38.2125	-5.72644	18.6259	28.6562	30.4728	5.03479	29.0402	-0.304077	-1.34192	-55.0236	31.7351	64.1954	9.79944	-24.9042	60.0298	5.8844	-81.7383	62.2728	55.6937	63.1078	20.2041	-167.834	-76.4408	-0.458252	150.139	6.21436	-8.55164	5.19482	-97.9291	-38.0481	51.1774	26.3406	-16.0406	32.2383	-119.057	80.3743	94.3746	-89.8373	17.6753	62.6007	59.9286	31.6228	49.7048	-60.559	-37.038	17.0219	-44.3752	10.7849
30.9497	38.4567	-5.72351	18.5392	27.5835	30.5013	4.27783	28.9082	-0.869019	-0.816406	-55.075	31.8693	64.6426	10.0378	-24.4362	59.3262	6.08044	-81.9968	63.5146	55.9564	62.8835	21.6089	-168.797	-77.4884	-0.548706	150.968	5.93591	-8.45947	5.31299	-99.4972	-38.5659	51.7648	26.3942	-15.4515	31.3989	-120.514	80.6002	93.668	-90.0067	17.7318	62.745	59.0864	31.6813	49.842	-60.1688	-38.0724	17.4406	-44.4564	10.1298
29.7721	38.7325	-5.8988	18.3468	26.5974	30.6227	3.4248	28.9423	-1.67651	-0.102539	-55.1644	32.4629	66.028	10.3844	-23.8314	58.5453	6.16553	-82.5776	64.3901	56.2792	62.9081	23.3068	-170.146	-77.9624	-0.489746	151.579	4.85425	-8.23657	5.17639	-101.504	-39.4382	52.2725	26.4437	-15.3146	31.0725	-121.334	80.7411	93.4755	-90.1648	17.6752	62.877	57.8164	31.6678	50.0261	-59.6714	-39.4598	17.451	-45.1932	9.66138
29.4542	38.9412	-6.10571	18.4141	25.8706	30.5643	2.4281	29.1124	-2.46289	1.12024	-55.5494	33.2085	67.1239	10.5647	-23.1079	56.124	5.93823	-82.5431	64.752	56.9941	63.3915	24.1365	-170.507	-79.9099	-0.509033	152.017	3.75098	-8.11108	5.09546	-101.998	-39.9689	52.7947	26.5093	-15.1069	30.7677	-121.528	80.4661	93.0084	-90.6929	17.7308	63.0936	57.0681	31.7021	48.9554	-59.4072	-40.1489	17.5443	-45.6388	9.53723
28.9565	38.9434	-6.38647	18.4893	26.203	30.9418	1.73462	29.0033	-3.90564	2.41455	-55.7791	33.6566	67.8677	11.0199	-22.4374	55.103	5.60681	-84.1973	64.9321	57.6735	63.7924	24.5474	-170.895	-80.6655	-0.744629	152.526	3.39441	-7.90564	4.42273	-102.964	-40.2736	53.1315	26.6549	-15.0923	30.1908	-122.527	80.2017	92.3293	-90.7943	17.7484	63.0082	56.7794	31.7078	48.0765	-59.2825	-41.035	17.5614	-47.0966	9.33081
27.9592	38.9883	-6.87939	18.7018	26.4148	31.2119	1.27625	28.8953	-4.65955	3.85437	-55.8778	34.2206	68.7548	12.0397	-21.6278	53.9053	5.15295	-85.9536	65.2301	58.0157	63.8273	25.1171	-171.289	-80.906	-0.763184	153.102	2.66321	-7.26868	3.55566	-104.272	-40.3857	53.3717	26.5389	-15.1678	29.4991	-123.671	79.7339	91.8159	-91.0298	17.5825	62.8749	55.9108	31.8143	47.9855	-58.7809	-42.5247	17.5226	-47.9279	9.26416
26.9017	39.0522	-6.99841	18.7567	26.5513	31.264	0.913818	28.7777	-5.68945	5.21228	-55.9712	35.2014	69.7541	12.3489	-21.9716	53.14	4.84558	-86.4948	65.8049	58.9819	63.7103	25.839	-171.492	-81.6589	-0.999023	153.608	1.86243	-6.79309	3.1405	-106.97	-40.6006	53.8247	26.7446	-15.2063	29.3146	-124.35	79.104	91.1938	-91.0132	17.2546	62.9583	55.3682	31.7544	48.1974	-58.2819	-42.5088	16.9086	-48.5258	9.36609
26.4852	39.2911	-7.26331	18.778	26.9396	31.2927	0.537354	28.6442	-6.48889	6.36816	-55.9373	35.7035	70.7648	12.3527	-22.1646	51.4797	4.10913	-87.7319	66.6722	59.7103	64.6034	26.3165	-171.152	-82.8	-0.945435	154.346	1.95117	-6.77112	2.5304	-107.892	-40.8848	53.8431	26.9467	-15.3512	29.5773	-124.53	78.1329	90.5267	-91.1658	16.9165	62.9535	54.149	31.8107	50.1511	-57.9663	-42.618	16.1987	-48.8075	9.35437
27.5419	39.3312	-7.42334	18.4738	27.3334	31.2299	-0.398315	28.8999	-7.20898	7.61389	-55.6829	36.541	71.2115	12.6233	-21.9525	49.1134	3.67175	-89.7468	67.295	60.5588	65.6006	26.635	-170.649	-83.606	-2.28491	154.589	2.67041	-7.14441	2.05469	-108.878	-41.0774	53.5714	27.7795	-15.5891	29.7909	-124.604	77.3816	90.4109	-91.5311	16.7885	63.1388	52.9131	31.8163	50.9847	-57.7881	-42.7173	14.7865	-49.0129	9.21558
28.7719	39.5201	-7.42273	18.0969	27.8542	31.2982	-1.16223	28.8693	-7.9342	8.96472	-55.55	37.032	71.0869	12.4728	-21.7941	48.1268	3.27319	-90.1855	68.1451	61.1211	66.3677	27.3579	-170.214	-84.437	-3.31616	154.426	1.83252	-7.67212	2.05212	-109.595	-41.261	53.4353	27.8182	-15.8326	30.3663	-124.917	76.6335	90.1226	-92.1305	16.8245	63.1188	52.9556	31.8427	51.075	-57.6024	-42.5236	13.7189	-49.6935	9.21167
28.8651	39.5693	-6.99097	17.2678	29.024	31.4456	-1.24634	29.4569	-8.62427	10.3069	-55.2145	37.3933	71.1105	12.2913	-21.8911	47.4304	2.13635	-91.1421	68.6492	61.8018	66.5719	28.4017	-169.764	-84.8878	-4.49304	154.334	1.65417	-7.80359	2.06946	-110.34	-41.6379	53.2733	28.8401	-16.5184	31.1979	-125.369	75.8713	90.2587	-92.8334	16.8124	63.2014	52.0927	31.9156	51.4011	-57.4004	-42.105	13.063	-50.1649	9.17517
28.7278	39.5555	-6.18604	16.5936	29.5555	31.6484	-1.30457	29.9971	-9.87805	11.7765	-55.101	37.8208	71.0197	11.8168	-22.5778	46.7811	1.41174	-92.7291	68.7617	62.9181	66.653	28.9122	-168.96	-85.6013	-5.755	154.208	1.26343	-7.55054	2.07202	-111.104	-41.7037	53.1194	29.2894	-17.6678	31.7854	-125.859	74.1328	89.5674	-93.364	16.5774	63.2737	51.2523	32.1035	52.4102	-57.3311	-41.8842	12.6493	-50.3918	9.12585
28.3451	39.5686	-5.44373	16.1678	30.0223	31.8186	-1.3103	30.2139	-10.6003	13.1481	-55.0862	38.6052	70.8636	11.981	-23.2101	45.4948	1.3125	-94.2372	68.8722	63.4946	66.8197	29.1482	-168.368	-86.9962	-7.03052	153.82	0.634521	-7.44299	2.42322	-111.825	-42.0533	52.7618	29.7017	-17.9625	32.1765	-126.422	72.4637	88.8367	-93.6194	16.2883	63.2124	49.4999	32.1383	53.6346	-57.3691	-41.7655	11.8568	-50.3273	8.91992
28.3361	39.6019	-4.51685	15.6655	30.3169	32.2466	-1.35242	30.6387	-11.4923	14.046	-54.7878	39.7231	70.814	11.3085	-24.0005	44.2574	1.16394	-95.7063	69.0844	64.0861	66.689	29.47	-167.85	-88.5889	-8.14624	153.515	0.254028	-7.15234	2.45752	-112.892	-42.5168	52.4567	30.1022	-19.0649	32.8938	-126.581	71.4147	88.2407	-93.9855	16.0873	63.1696	48.3765	32.2084	54.1039	-57.2792	-41.7925	11.238	-50.1636	8.6897
28.6044	39.5997	-3.53455	15.8494	30.641	32.5765	-1.3324	31.8959	-12.0387	15.3622	-54.1582	39.9805	71.3084	10.0675	-24.2848	42.9099	1.25073	-96.8246	69.156	64.7004	68.8694	29.9353	-168.424	-89.2203	-8.4845	153.592	0.131226	-6.86768	2.31653	-113.66	-42.3014	51.905	30.5736	-21.1132	33.7328	-126.75	70.3215	87.4419	-94.3809	15.1916	63.1492	47.7673	32.4138	54.0833	-57.1254	-41.2439	10.0594	-50.0684	8.70569
29.0226	39.6881	-2.27112	16.454	31.0674	32.9437	-1.31189	32.8182	-13.2289	16.6559	-53.9783	40.7723	71.9546	9.62207	-25.343	42.158	1.19421	-97.324	69.3658	65.0377	68.434	30.1681	-168.737	-90.1012	-9.26526	153.825	-0.157715	-6.46118	2.08838	-114.369	-41.8285	51.2998	31.8468	-23.2021	34.25	-126.686	69.9714	87.0319	-95.2122	14.48	63.2323	47.2935	32.6101	54.1881	-56.9755	-40.7919	9.12109	-49.8308	8.76672
29.3655	39.524	-1.15442	17.1539	31.5754	33.2644	-1.84766	34.4895	-13.7251	17.3004	-53.7096	41.8488	72.4247	9.18994	-25.6895	41.0898	2.23303	-98.5469	69.4434	65.4955	68.0719	30.4182	-169.701	-90.3893	-10.5604	154.46	-0.340332	-6.17761	2.20032	-115.295	-41.8296	50.8065	32.8995	-24.3474	34.5543	-126.722	69.2633	87.2045	-95.9989	14.6755	63.291	46.583	32.8221	54.2993	-56.7811	-41.202	8.16345	-49.6647	8.83765
30.4773	39.4414	-0.0206299	17.5356	31.9556	34.2415	-1.89453	35.7393	-14.397	18.1196	-53.7233	42.6024	72.8706	8.85803	-25.792	39.5382	3.09521	-99.3123	69.3651	66.0148	66.9508	30.381	-171.102	-91.0193	-11.7225	155.099	-0.364868	-5.76636	2.29443	-117.055	-41.597	50.2959	33.6901	-25.3381	35.016	-125.619	68.0254	87.3636	-96.2395	13.3339	63.1259	45.007	33.1069	53.8846	-56.7397	-41.6027	6.50146	-49.212	9.00012
31.1556	39.3367	1.16748	17.5481	32.33	35.4677	-2.84509	36.5669	-14.8934	19.0668	-53.8105	43.2979	73.3154	8.43896	-25.4524	37.9993	3.48499	-100.631	69.2804	66.2792	66.627	30.152	-172.475	-91.9639	-12.8474	155.834	-0.389038	-5.69104	2.29736	-117.566	-41.1786	49.825	33.9761	-26.1727	35.7694	-125.213	67.1036	88.4026	-96.5031	11.5837	63.224	44.2733	33.5457	53.9075	-56.9003	-41.8185	5.66504	-49.0551	9.23767
31.9596	39.1398	1.54919	17.5588	32.9116	36.0437	-3.39478	37.3315	-15.3116	20.2565	-53.8799	43.9059	73.486	8.38184	-24.7493	37.3577	3.80835	-102.415	69.3295	66.7	66.025	29.9539	-173.043	-92.6289	-13.1038	156.497	-0.608765	-5.6449	2.45032	-118.473	-40.9039	49.1259	34.5765	-27.792	35.9437	-124.171	66.3164	88.4214	-97.061	9.89514	63.2793	43.7433	33.8538	53.6299	-56.9789	-42.1013	4.5271	-49.0424	9.35608
32.2629	39.1143	2.198	17.4921	33.3604	36.7172	-3.85669	38.019	-15.2378	21.0734	-53.8882	44.7372	73.6942	8.33508	-23.0725	36.0929	4.19592	-102.936	69.4072	67.3948	65.4568	29.7845	-173.953	-93.681	-14.354	157.077	-0.903809	-5.38171	2.66541	-119.08	-39.9031	48.5548	35.3772	-28.8081	37.0796	-123.39	66.7161	88.9749	-97.6582	9.22107	63.2418	42.9905	34.0609	52.9706	-56.9502	-42.0798	3.77185	-49.0721	9.13525
32.8081	39.2682	2.82849	17.5417	34.0067	36.9115	-5.46533	38.7997	-15.2297	22.1178	-54.1575	45.7563	73.658	8.07092	-21.944	35.5566	4.98804	-103.367	69.4922	67.4612	64.8551	29.7324	-174.758	-94.0107	-16.5288	157.076	-1.09827	-5.13953	2.66504	-120.14	-39.077	47.8204	36.4458	-29.407	38.0858	-122.324	67.261	88.6393	-97.9791	7.64038	63.4796	42.1821	34.316	52.2273	-56.8455	-42.072	2.9248	-49.2355	8.88635
33.5039	39.2946	3.05603	17.51	34.5214	37.349	-7.25049	40.2007	-15.3292	23.483	-54.4916	46.5579	73.6521	7.78723	-21.7825	34.9069	6.0155	-103.972	69.4181	67.453	64.2568	29.5431	-175.536	-94.3315	-17.1603	156.952	-1.38013	-4.91089	2.71533	-121.541	-38.537	47.4178	36.8376	-29.9849	38.5371	-120.911	68.0662	88.8071	-98.197	6.87964	63.776	41.3723	34.2229	51.1509	-56.8984	-41.6863	1.1167	-49.3833	8.27747
33.9758	39.5258	3.31323	17.412	34.7675	37.5112	-8.16748	41.0114	-15.3348	24.8358	-54.7322	47.3738	73.2434	7.14417	-21.4642	34.8273	5.98181	-104.147	69.3524	67.3297	63.8428	29.5635	-176.159	-94.6294	-17.6896	156.664	-1.47253	-4.2804	2.66016	-122.352	-37.8582	46.8905	36.7543	-30.9482	39.0764	-120.121	68.4879	88.8087	-98.5449	6.4032	64.3723	40.9619	34.3121	50.3063	-56.9008	-41.1445	-0.312866	-49.5049	7.51111
34.2809	39.6775	3.46875	17.8032	35.3146	38.1141	-8.90039	42.5901	-15.0883	25.3397	-55.343	48.3032	72.9434	6.63672	-21.1371	34.9595	6.20471	-104.483	69.3817	67.1195	65.2247	29.4131	-176.888	-95.1108	-19.0928	156.07	-2.21387	-3.80127	2.62329	-123.649	-37.3752	46.5223	37.3059	-31.4839	39.4299	-119.384	69.114	87.674	-98.7675	5.10059	65.233	40.4392	34.6741	49.8588	-56.9788	-40.2354	-0.985107	-49.741	7.02515
34.6692	39.5991	3.37305	17.9861	35.9844	39.0616	-9.00342	43.6948	-14.8716	26.0984	-56.1031	49.2874	72.2272	6.40759	-20.4708	35.1978	6.5144	-104.735	69.599	66.4788	64.4918	29.2188	-177.44	-95.387	-20.6777	155.03	-2.17847	-3.01025	2.61755	-124.949	-37.0292	45.96	37.9067	-32.2516	39.4086	-118.86	69.8254	87.949	-98.9838	3.48413	65.4655	39.9119	34.6121	49.3831	-56.9834	-39.8788	-1.58215	-50.0736	6.73694
35.1987	39.3981	3.1731	18.8075	36.316	39.1488	-9.7522	44.1	-14.3488	26.9054	-56.6224	49.9757	71.2883	6.29663	-19.4028	35.5325	7.14697	-104.887	69.912	66.0887	63.5353	29.095	-178.302	-96.0284	-21.5844	153.385	-2.61877	-2.32483	2.43054	-125.555	-36.8599	45.88	39.2953	-33.9114	40.0721	-118.369	70.5126	88.0005	-99.0618	1.2948	65.744	39.6047	34.9337	49.0044	-57.0347	-38.5892	-2.44641	-50.4563	6.12598
35.5725	39.3831	2.93066	20.0094	36.4221	39.3215	-10.1312	45.3276	-13.8757	27.4272	-57.4294	50.7671	70.7823	6.06702	-18.7745	35.7397	7.05347	-104.954	70.2098	65.8223	62.8599	29.1834	-178.818	-96.1703	-21.976	152.277	-3.08679	-1.65454	2.32751	-126.891	-36.6309	45.3002	40.5125	-34.4785	40.8568	-117.864	70.4436	88.3619	-99.2256	-0.128662	65.7529	39.4316	35.3121	48.2266	-57.0361	-37.0508	-2.63513	-51.0474	5.13818
35.8741	39.3855	2.73083	20.626	36.5551	39.5216	-10.6335	45.9753	-13.1016	28.2823	-58.4864	50.8499	70.1541	5.80029	-18.4696	36.1381	6.90674	-105.37	70.5293	65.3873	62.4729	28.9548	-179.442	-96.2952	-22.806	151.693	-3.44653	-1.37244	2.13843	-128.207	-36.3878	45.1785	41.2845	-36.6157	41.3519	-117.997	70.1718	88.6661	-99.4907	-1.62524	65.5355	39.4803	35.2827	47.8275	-57.0045	-34.2841	-1.46045	-51.1532	4.3501
36.2566	39.3915	2.84399	21.3004	36.7407	39.5355	-11.7222	46.8036	-12.5525	28.8555	-58.731	51.6858	69.5073	5.58582	-18.5798	36.0397	6.58081	-105.868	70.5829	65.1641	61.7631	28.8429	-180.351	-96.4866	-24.3859	151.738	-3.8269	-1.17017	1.78247	-129.891	-35.9189	44.9186	41.463	-37.3347	41.8694	-118.087	70.0402	89.2633	-99.5012	-2.68933	65.4506	39.4205	35.0892	47.4934	-57.0043	-34.0341	-0.578857	-51.4884	4.04395
36.433	39.266	3.02319	22.2941	36.9216	39.2478	-12.0084	47.1708	-11.9434	29.1478	-59.4631	52.3049	68.8445	5.53455	-18.5294	36.0557	6.34277	-106.256	70.5599	65.1248	60.8665	29.0165	-181.199	-96.3411	-25.0879	151.555	-4.52979	-0.929443	1.49207	-130.7	-35.582	44.5365	41.7015	-39.4003	41.8102	-117.713	70.6545	89.5756	-99.6952	-4.7373	65.4705	39.3937	35.8407	47.2844	-57.0038	-33.8696	0.755859	-52.0139	3.59155
36.6454	39.2302	3.60242	23.0055	37.1418	38.9082	-11.939	47.5472	-11.0359	29.5315	-60.1412	53.4803	68.1017	5.5238	-17.6094	35.5802	6.02197	-106.743	70.4562	64.6039	59.8975	29.0846	-181.552	-96.2312	-25.7651	150.589	-4.82397	-0.720459	1.29272	-131.132	-35.3346	44.3868	42.3092	-40.5764	41.4923	-117.719	71.0251	89.8577	-99.7738	-6.19226	65.5249	39.1973	35.864	47.027	-56.9086	-33.1497	0.638062	-52.5911	3.19421
37.033	39.3815	4.53235	24.0525	37.4341	38.5349	-12.283	48.2458	-10.5294	29.7614	-60.1599	54.0374	67.5854	5.42908	-16.9266	35.073	6.09851	-107.53	70.2582	64.0961	58.6835	29.2595	-182.539	-96.1824	-26.1234	149.702	-5.2915	-0.463623	0.468628	-131.295	-35.3628	44.1318	44.5358	-41.6688	40.2949	-117.235	71.8138	90.1311	-100.079	-8.10962	65.2301	39.2151	36.3311	46.5748	-56.6938	-32.2319	-0.0786133	-52.7024	2.4325
37.8644	39.3893	5.43677	24.356	37.6415	38.0254	-12.5029	48.8621	-9.64941	29.7825	-59.861	54.7964	67.2487	5.43872	-16.371	34.2675	6.13867	-108.251	70.2482	63.9257	57.6542	29.4094	-183.838	-96.1475	-26.8594	149.401	-5.56885	-0.249268	0.515015	-131.768	-35.254	43.9696	44.9683	-43.0281	38.4308	-117.715	72.0811	90.1984	-100.019	-9.39709	65.0166	39.2266	37.0667	46.2714	-56.6469	-31.2052	-0.0803223	-52.9204	1.81958
38.5986	39.2391	5.28406	25.1766	38.0752	37.5177	-12.4463	49.8604	-8.72363	29.5161	-59.6215	55.0489	66.9164	5.49084	-16.2378	33.9423	6.19189	-109.53	69.9917	63.8817	57.1204	29.7222	-184.949	-96.1335	-27.6068	149.461	-5.59045	0.418823	0.435181	-133.137	-35.2474	43.7822	45.3496	-44.4728	37.416	-118.788	72.6342	89.642	-99.8983	-10.2334	64.5874	39.2998	37.2755	45.6193	-56.134	-29.9752	0.175415	-53.2915	1.72827
39.3614	38.8062	4.53394	26.1123	38.3389	36.9407	-12.603	50.2188	-7.59851	29.0175	-59.2596	55.7808	66.8239	5.59668	-16.2653	33.1895	6.42615	-111.099	69.8472	64.2534	56.6696	30.068	-186.677	-96.5513	-28.4064	149.463	-5.30481	1.00098	0.294556	-133.66	-35.2772	43.5496	45.3047	-46.0476	36.1731	-119.419	73.281	89.8307	-99.9116	-10.9116	63.986	39.2712	37.7664	45.2454	-55.7795	-29.0575	0.255249	-54.1793	1.42383
39.9785	38.7487	3.61621	26.7236	38.484	36.6533	-12.9348	51.0319	-6.66199	28.3948	-59.0514	56.5927	66.3905	5.62512	-16.2394	32.1232	6.73914	-111.709	69.7333	64.6979	55.5521	30.413	-188.613	-96.8328	-28.9204	148.998	-4.69873	1.75354	0.194946	-134.865	-35.2137	43.4657	45.2821	-47.0585	35.7506	-119.361	73.9943	89.9076	-99.9926	-12.2155	62.7975	39.1114	38.7023	44.1927	-55.1031	-28.4961	0.564941	-55.0741	1.16907
40.5768	39.0298	3.63	27.2656	38.6213	37.0901	-13.2994	52.0782	-5.29346	27.7401	-58.0677	57.4657	66.0696	5.77136	-16.2766	31.9293	7.30542	-112.883	69.6012	65.5068	54.9894	31.1796	-189.871	-96.7319	-29.7319	148.438	-4.13306	2.0116	-0.0117188	-136.699	-35.9729	43.4053	45.1122	-48.4185	35.2355	-119.395	74.8678	90.2051	-99.8779	-12.9893	62.6069	38.9434	40.0037	43.5001	-54.5725	-27.1604	1.30249	-56.9187	0.864746
41.771	39.1069	3.97119	27.6483	38.5021	37.6716	-13.6406	52.5325	-4.64526	27.168	-57.3433	57.9115	65.9679	5.99292	-15.8147	31.4454	7.79956	-113.443	69.4421	66.2019	53.3972	31.7529	-190.095	-96.5688	-31.0986	148.02	-4.20593	2.48962	-0.428345	-138.554	-36.9072	43.3546	45.1219	-49.9358	34.3533	-119.221	75.7502	90.3192	-99.9528	-13.5706	62.8102	38.7518	40.3994	43.1516	-54.4247	-26.5707	3.20361	-58.5431	0.355957
42.3103	39.8453	4.00232	28.0883	38.2205	38.2112	-14.4231	52.9177	-3.427	26.3218	-56.7518	58.7544	65.9801	6.33643	-15.5463	30.8879	8.32532	-113.993	69.2867	66.9426	52.4657	31.5892	-191.244	-96.2008	-32.2433	147.92	-4.86011	2.49084	-0.624268	-139.91	-37.7815	43.4042	45.2488	-51.2798	33.3773	-119.548	77.0393	90.8463	-99.8053	-15.0559	62.8865	38.6698	41.3468	42.1976	-53.5173	-24.5342	4.26404	-58.7196	0.371948
43.5631	39.4202	4.07788	28.7214	37.7677	38.7419	-15.3243	53.3956	-2.52478	25.4769	-56.288	59.6229	65.908	6.30054	-14.8335	31.0054	9.01379	-114.637	69.2167	67.1428	52.9141	31.9149	-193.216	-96.0869	-33.0846	148.047	-5.84717	1.69189	-0.84082	-141.33	-38.6707	43.4502	45.3015	-52.1736	32.7914	-120.382	78.123	92.0566	-99.8075	-16.0953	62.7355	38.662	41.3812	41.4456	-52.8824	-24.4294	4.74438	-58.7366	-0.14856
44.2716	39.1118	4.39258	28.7151	37.5277	39.0941	-16.1731	53.4524	-1.03235	24.6127	-55.3909	60.1071	65.8977	6.44067	-13.816	31.2937	9.47974	-115.207	69.301	67.179	52.6179	32.6361	-194.756	-95.8951	-33.4246	148.245	-6.70691	1.00818	-1.48193	-143.13	-39.1553	43.5095	45.3103	-52.9436	32.8442	-122.341	79.472	93.302	-99.6147	-17.0023	62.8261	38.5458	42.0474	40.2224	-52.505	-24.3684	5.32141	-59.0331	-0.6698
44.5897	38.7224	4.55176	28.3741	37.3551	39.1331	-17.3125	53.3851	-0.31897	23.8208	-54.5156	60.723	65.8712	6.823	-12.9644	32.4188	10.0703	-116.12	69.2532	66.9071	51.9546	33.1569	-195.575	-95.9761	-34.0782	147.829	-7.40955	0.366333	-1.75208	-144.393	-39.927	43.5472	45.3735	-54.4365	32.8453	-123.638	80.3197	94.9331	-99.5603	-17.8894	62.4619	38.3694	42.8886	39.5691	-51.97	-24.191	6.42712	-59.9497	-1.3562
44.7699	38.4932	4.29614	28.8093	37.0645	39.5356	-17.2932	53.2186	0.778931	23.1539	-53.4214	61.0939	66.1429	7.09839	-12.3295	33.3707	10.4584	-118.152	69.1205	67.4075	50.8768	33.2949	-196.443	-96.2781	-34.8595	147.917	-7.6936	0.0394287	-1.65051	-147	-40.8997	43.4535	45.4663	-55.5515	32.7319	-124.02	81.3212	95.0482	-99.577	-19.5255	61.1199	38.3292	43.1606	38.5908	-50.9854	-24.21	7.79443	-61.7047	-1.70984
45.5039	38.5173	3.90503	29.036	36.9039	40.5111	-19.6947	52.7576	1.65588	21.964	-52.3931	61.8562	66.6349	7.29358	-11.3856	34.3396	11.4047	-119.073	68.6317	68.228	50.1788	33.4503	-197.124	-96.509	-35.6741	148.626	-8.39001	-0.513916	-1.53491	-148.249	-41.835	43.3783	45.5747	-56.3955	32.8297	-125.235	82.0952	95.3612	-99.7689	-20.2847	60.7892	38.259	43.9268	37.9163	-49.7194	-24.4065	9.11475	-63.6483	-0.926514
46.7667	38.4392	3.59143	29.1069	37.2408	41.5874	-20.0164	51.9302	3.06152	21.5276	-52.027	63.1112	66.8805	7.4082	-10.5504	35.2239	12.9789	-119.7	68.5232	69.3883	50.1075	33.541	-197.557	-96.5229	-36.1307	148.539	-8.98743	-0.948975	-0.894165	-148.915	-42.2463	43.8339	45.4961	-57.4469	32.7709	-126.624	83.3522	96.0615	-99.7769	-21.1162	59.594	38.1449	44.3805	36.7504	-49.1508	-24.7246	9.64978	-64.605	-0.501587
47.5991	38.4161	3.453	29.2137	37.7264	42.5775	-20.9922	51.6519	5.28687	20.9043	-51.9659	63.5757	67.0619	7.44043	-9.78613	35.6013	14.7716	-120.291	68.2494	69.4823	50.3087	33.6666	-198.429	-96.6768	-36.2728	148.792	-9.80273	-1.63464	-0.0369873	-149.998	-42.4728	44.8793	45.6036	-58.2581	32.8538	-127.735	85.5243	96.5098	-99.9563	-21.6403	58.7935	38.141	45.1222	35.8523	-48.6327	-24.7528	10.3317	-64.9133	-0.511963
48.7261	38.4658	3.27209	29.4528	37.7759	42.9069	-21.844	51.2722	6.21802	20.0179	-51.7297	64.5239	67.6887	7.47168	-9.0238	35.5455	15.5669	-120.914	67.8743	69.5148	50.4749	33.9642	-199.484	-96.9473	-36.7097	148.787	-10.1329	-2.11987	-0.0212402	-152.163	-42.8442	45.4557	45.7587	-59.2589	32.6876	-128.982	86.9	97.5197	-100.22	-22.5912	57.864	38.1044	45.5117	35.3434	-48.1625	-24.74	10.7208	-65.5132	-0.732544
49.4596	38.5601	3.24915	29.6782	38.1921	43.1425	-22.3649	50.8866	6.84363	18.6476	-51.6876	64.9503	67.931	7.50391	-8.27014	35.573	15.967	-121.778	67.6326	69.4193	51.6986	34.121	-200.069	-97.011	-37.2212	148.89	-10.5634	-2.69421	-0.0751953	-153.194	-43.0879	46.0798	46.0442	-59.5228	31.2213	-131.836	87.4552	98.1528	-100.354	-23.1378	56.4644	38.1285	46.7571	34.0828	-47.6926	-25.015	11.4454	-66.0857	-0.80835
50.3032	37.7109	2.38806	29.7632	38.8312	43.0872	-23.6263	50.1917	7.9054	17.775	-51.8169	65.8073	67.8564	7.48291	-7.08301	35.4783	16.4949	-121.982	67.3145	69.3558	53.9546	34.0026	-200.745	-96.9119	-37.5761	148.574	-10.7496	-2.80786	-0.10498	-154.161	-43.7386	47.4916	46.2303	-59.691	30.1158	-132.837	88.413	98.6561	-100.267	-23.8967	55.2251	37.985	47.0887	33.1229	-47.6675	-25.6084	11.949	-66.8361	-0.934204
51.9269	37.5754	1.45215	29.797	39.1782	43.3234	-23.9137	49.6093	9.71948	16.6812	-51.5305	66.5486	67.7523	7.33643	-6.85046	35.4292	17.4586	-122.278	67.168	69.2539	54.8887	33.9371	-201.457	-96.614	-37.606	148.093	-10.7665	-2.92419	-0.0422363	-155.066	-43.8291	48.1094	46.9602	-59.8995	29.1489	-133.778	88.6729	98.3789	-100.309	-23.8781	53.8737	37.9493	47.5657	32.1447	-47.8643	-26.4546	12.5748	-68.021	-1.38074
52.8344	37.381	0.560669	29.7496	39.3127	43.6497	-24.019	49.0051	10.7552	15.9706	-51.4673	67.8218	67.8014	7.18127	-5.74854	35.3726	18.5332	-122.878	67.0054	69.2197	55.3781	33.8027	-202.49	-96.2812	-37.2062	147.982	-10.5776	-2.70056	0.0415039	-156.495	-43.5541	49.2075	47.3413	-60.1842	28.9058	-135.937	90.0571	98.1929	-100.466	-24.0374	53.4749	37.9719	47.7126	31.8372	-46.4688	-26.9111	13.0474	-68.9563	-1.74231
53.7399	35.9041	0.348877	29.8259	38.958	43.9358	-24.2791	48.3026	11.8143	15.1919	-51.2397	68.4629	67.6135	6.72925	-4.83679	34.9324	19.1698	-123.194	66.9711	69.4681	55.3041	33.6176	-203.233	-96.0737	-36.9353	148.309	-10.849	-2.77283	0.0300293	-157.568	-43.2836	49.8081	47.4752	-60.501	27.6969	-138.71	91.5105	98.3551	-100.219	-23.9495	53.1199	37.9708	48.351	30.3788	-44.5123	-27.3394	13.7552	-69.3082	-1.70178
54.3733	35.0537	0.438354	29.913	38.9259	43.8712	-24.2961	47.6605	13.0541	14.1836	-50.7393	68.9092	67.3881	6.50806	-3.61609	34.6201	19.4932	-123.194	67.0056	69.3759	55.2839	33.7592	-204.157	-96.1162	-36.5017	148.569	-11.1375	-3.00366	0.253784	-158.76	-43.2045	50.1066	48.2816	-60.8938	26.2412	-139.033	92.1696	98.579	-99.9448	-23.985	52.3696	37.8956	49.2926	30.4117	-44.0623	-27.8401	14.1803	-69.5115	-1.86267
54.6265	33.8928	0.649292	30.2355	38.8374	43.8126	-24.3412	47.2926	15.4612	13.496	-50.2992	69.8632	67.2764	6.38708	-2.51697	34.6782	20.1257	-123.071	66.9514	69.6924	55.7949	33.8533	-205.787	-95.8569	-35.5284	148.929	-11.4821	-3.40283	0.136841	-160.244	-43.2522	50.7947	49.6565	-61.1776	25.3898	-139.664	91.8524	98.663	-99.776	-23.8339	51.9927	37.8485	49.619	30.0729	-44.1995	-28.5402	14.6915	-68.8214	-2.14258
55.3228	33.3778	0.863647	30.2024	38.7627	43.6139	-24.377	46.3612	16.3922	12.9076	-50.3024	70.6154	66.9728	6.23975	-2.0238	34.7617	20.9585	-123.101	66.8632	70.2	56.4879	34.0245	-207.025	-95.5808	-34.1272	149.755	-11.4633	-3.70642	0.034668	-161.276	-43.3387	51.4558	50.434	-61.6272	24.6836	-141.747	91.4611	98.6328	-99.4214	-23.6512	51.5919	37.8674	49.8109	29.7863	-42.7572	-29.3217	14.8966	-67.9365	-2.20984
56.5553	33.0316	0.890625	29.9951	38.7311	43.3196	-24.2308	45.3016	17.3036	11.8059	-50.3469	71.0717	66.5636	6.13135	-1.06104	34.9634	21.8346	-123.028	66.7671	70.8589	56.9851	34.0687	-208.046	-95.431	-32.3322	149.986	-11.9481	-3.76733	0.0645752	-161.915	-43.3772	53.0144	50.7659	-62.1124	23.9779	-143.804	91.4921	98.6744	-99.2817	-23.3715	50.8558	37.8373	50.0143	29.4293	-40.8474	-30.3365	15.3115	-67.5035	-2.51575
56.95	32.5039	0.108032	30.1561	38.5573	43.1897	-24.0964	44.5876	18.0591	11.223	-50.2771	71.9115	66.6039	6.19983	0.25	35.1421	22.2963	-122.919	66.8241	71.699	57.3441	34.1453	-210.322	-94.9551	-31.6989	150.615	-13.5851	-4.01611	0.331665	-162.665	-43.4047	54.1713	51.0485	-62.3943	22.5585	-144.261	91.2041	99.0765	-99.1095	-22.9224	49.8334	37.78	50.1178	29.121	-39.1566	-31.6688	15.9297	-66.0651	-3.01843
57.6157	31.7579	-1.04272	30.3829	38.5054	43.5513	-23.9034	45.8433	18.3464	10.3053	-50.2982	72.4893	66.6545	5.91614	0.981689	35.0787	22.4187	-122.99	66.9161	72.4252	56.986	34.1505	-211.389	-93.7836	-31.4375	151.696	-13.8368	-4.49512	-0.0672607	-163.344	-43.1204	55.0308	51.4323	-62.4412	21.3075	-145.463	91.1407	99.7368	-99.0671	-22.1843	49.6053	37.72	49.9476	28.2928	-38.9351	-32.3835	16.3999	-65.0082	-3.06299
57.715	31.089	-2.01123	30.5593	38.4658	44.3383	-24.0453	46.5493	19.095	9.90393	-50.5582	72.8882	66.4707	5.72998	1.51843	35.1846	22.5209	-123.373	66.9734	72.7428	56.7859	34.568	-212.085	-94.1594	-31.1276	153.313	-14.228	-4.73157	-0.103394	-163.61	-43.0004	56.3143	51.705	-62.4016	20.4438	-148.373	91.2896	100.136	-99.1221	-21.6113	49.243	37.7445	49.6859	27.8131	-38.4803	-33.4634	16.6337	-64.6661	-3.29858
57.2352	30.2921	-3.31458	30.7805	38.4407	44.9709	-24.224	47.1113	19.5469	9.55774	-50.7072	73.8174	66.2513	5.26819	2.59851	35.2258	23.0363	-123.834	67.0846	73.2028	56.3932	36.3658	-212.924	-93.9697	-30.9734	154.163	-14.8595	-5.18799	-0.163696	-163.765	-43.0648	57.1458	52.4591	-62.2708	20.1384	-149.885	91.5586	100.186	-99.0901	-21.0823	48.9026	37.691	49.3844	27.2998	-37.7756	-34.6348	16.9644	-62.1074	-3.48645
57.0308	30.224	-4.63879	30.4158	38.433	45.4316	-24.4402	48.2067	20.0039	8.66248	-50.828	74.3707	66.2209	4.92908	4.37622	35.2051	23.8092	-124.381	67.1686	74.3345	57.4049	37.691	-214.136	-94.0293	-30.6146	154.83	-15.261	-5.8457	-0.141968	-163.968	-43.4642	58.0151	52.8254	-62.0616	19.2384	-149.94	91.6642	100.055	-98.8696	-20.9587	48.5546	37.7141	49.7756	27.0814	-36.8088	-36.4131	17.6416	-59.661	-3.66394
56.6063	29.4147	-5.75269	29.8623	38.4585	46.1107	-24.6556	48.4374	20.822	8.39648	-51.0118	74.5118	66.0177	4.91248	5.34839	34.7883	23.9707	-124.804	67.2693	74.8136	58.4319	38.401	-215.917	-94.0476	-30.0809	155.768	-16.4103	-5.7981	-0.141235	-164.053	-43.5422	59.1865	53.197	-62.5143	18.5199	-151.503	91.563	99.9044	-98.6826	-20.4028	47.1075	37.6649	49.8448	25.918	-36.6951	-37.3546	18.2544	-59.6742	-3.97876
55.9685	28.8405	-6.84851	29.5981	38.4277	47.0592	-24.9865	48.5529	21.0614	8.28186	-51.2754	75.3791	65.9435	4.74731	5.94592	34.2445	24.0114	-124.954	67.1971	76.4824	59.2675	39.2676	-216.372	-94.1908	-29.3165	156.686	-16.9773	-5.13672	0.00769043	-164.177	-43.9233	59.9337	54.2748	-63.1677	17.8529	-154.209	91.0302	99.4447	-98.5239	-20.1118	45.8309	37.5554	49.8878	24.8641	-37.5216	-38.3423	18.8315	-58.3022	-4.30493
55.8779	28.7534	-7.91638	29.3228	39.0242	47.9874	-25.578	48.7264	21.5876	8.15381	-51.5284	76.1538	65.861	4.79431	6.52344	33.9519	24.2549	-125.074	67.0223	77.2037	59.1909	41.5496	-216.552	-94.3247	-28.751	156.839	-17.3848	-4.63391	0.0463867	-164.386	-43.825	60.589	54.7764	-63.4734	17.6616	-155.493	90.424	99.2432	-98.4092	-19.7722	45.7572	37.6836	49.8817	24.4976	-38.0028	-39.079	18.9167	-57.1758	-4.54785
55.8175	29.1501	-9.05774	28.6897	39.545	48.6859	-25.9742	48.802	21.6404	7.78845	-52.1632	76.7893	65.8976	4.69055	7.40625	33.1107	24.6852	-125.677	67.1794	77.781	59.3046	42.7037	-217.819	-94.4248	-28.2485	156.813	-17.5649	-3.75793	0.124023	-164.695	-45.3846	61.5862	55.094	-63.8635	17.3148	-156.176	90.0614	98.2457	-98.3643	-19.5602	45.52	37.7699	49.8127	23.7346	-39.2926	-39.3746	18.6376	-56.8098	-4.78381
55.7672	29.2637	-10.2366	27.912	39.6438	49.1293	-26.1509	49.0995	21.7982	7.4303	-52.5771	77.6761	66.0675	4.39941	8.32703	31.8647	24.7185	-126.226	67.4667	78.7286	59.5508	43.7611	-218.781	-94.584	-27.7866	156.649	-18.0787	-2.52942	0.142578	-165.296	-45.5382	61.9445	55.6451	-63.5537	16.9135	-157.578	89.7451	97.3384	-98.1892	-19.4319	44.3899	37.8895	50.1508	23.4452	-40.6859	-39.1448	17.9697	-56.8042	-5.04077
55.89	29.1895	-11.0709	27.0483	40.2288	49.4169	-26.405	49.166	22.0969	8.32751	-53.074	78.2032	66.0349	3.89856	8.64758	30.4739	24.6045	-127.943	67.7888	79.296	59.4161	44.533	-219.538	-94.6416	-27.7209	156.403	-18.7828	-1.80872	0.00439453	-165.752	-46.4344	62.2327	55.5953	-62.8634	16.4707	-159.908	89.361	97.1381	-98.1464	-19.1576	43.0568	37.5243	50.5677	21.9927	-42.0188	-39.2817	17.616	-56.9728	-5.22852
56.1709	28.73	-12.187	26.1713	40.7042	49.8638	-26.946	49.1416	22.3168	9.29187	-52.9929	79.1621	66.1367	3.67468	8.67151	30.3427	24.3462	-129.031	68.071	79.7222	59.4221	45.7751	-220.523	-94.7351	-27.689	156.013	-19.6337	-0.795776	0.0721436	-166.612	-47.1542	62.7711	56.321	-62.2621	16.0416	-161.008	89.2346	95.9913	-98.1036	-19.021	41.683	37.2927	50.3552	21.4679	-42.7384	-38.6265	17.0581	-57.4158	-5.427
56.4391	28.439	-13.6741	25.7711	40.9374	50.4351	-27.4504	49.0513	22.9297	9.8064	-53.0343	79.8329	66.408	3.55566	8.71826	31.1251	24.2882	-129.791	68.147	80.8812	59.6747	46.6853	-221.507	-95.0654	-27.694	155.788	-19.9178	-0.577881	-0.157227	-166.88	-47.7717	63.2067	56.6509	-61.0195	15.7058	-160.976	88.9636	94.5244	-98.0499	-19.0659	40.5167	36.6676	49.219	21.1132	-43.7185	-37.6779	16.7349	-57.6305	-5.698
56.5709	27.5901	-15.7885	25.4299	41.1985	51.6793	-27.7208	48.932	23.4446	10.0513	-53.4144	80.8531	66.7311	2.99023	8.79626	32.043	24.2902	-130.531	68.1405	81.7958	59.8795	48.1089	-224.562	-95.2722	-27.6818	155.619	-20.0922	-0.299805	-0.184326	-167.569	-48.1761	63.4929	57.2855	-60.3334	15.2021	-162.194	88.646	93.9689	-97.8131	-19.1034	39.6459	36.5989	48.2135	20.6216	-44.2273	-36.613	16.3881	-57.6019	-5.68713
56.5126	27.5157	-16.9	25.573	41.6024	52.2704	-27.8979	48.8822	23.8286	9.49292	-54.0172	81.4919	67.4009	2.56763	8.59741	33.7605	24.3583	-131.597	68.2153	82.396	60.134	49.3958	-225.432	-95.377	-27.7506	155.989	-20.3699	-0.017334	-0.192871	-169.493	-48.507	63.6315	57.6107	-58.5781	14.604	-165.082	88.2834	92.7758	-97.6345	-19.0041	37.9333	36.2375	47.3676	19.9652	-44.5562	-35.0507	15.7119	-57.0975	-5.86194
56.2264	27.703	-17.8435	26.3457	42.0325	52.6061	-28.0361	48.7451	24.8304	8.56335	-54.3243	82.145	67.719	2.31384	8.42981	34.7877	24.428	-132.352	68.2623	83.2908	60.5668	50.9454	-225.753	-95.5161	-28.0037	155.834	-20.4963	0.00842285	-0.122437	-172.012	-48.5969	63.6494	57.7571	-58.2899	13.7875	-165.569	88.1262	91.1508	-97.7377	-18.7657	37.5679	36.3356	46.5164	18.9585	-44.6132	-34.2897	15.455	-56.641	-5.58301
56.2827	27.9166	-18.7854	27.6362	42.7993	53.1699	-28.1802	48.7426	25.4202	7.40723	-54.5017	82.8297	67.8575	1.58081	8.27515	35.4749	24.4866	-133.013	68.257	83.9629	61.1893	53.0112	-228.25	-95.7511	-28.1775	155.572	-20.6678	-0.145264	-0.247314	-172.88	-48.4327	63.5458	58.2269	-57.9417	12.2303	-166.189	87.4325	89.7062	-97.3447	-18.1851	37.2792	36.8661	45.7231	17.2712	-44.6431	-34.0107	15.9026	-55.2969	-5.29224
56.5266	28.1143	-19.9608	28.9022	43.2577	53.454	-28.4069	48.8574	26.3319	7.33691	-54.4976	83.1584	68.3406	1.34961	7.9707	36.2528	24.3214	-134.309	68.2594	85.5369	62.8951	53.5872	-229.301	-96.0037	-28.0597	155.312	-20.7739	-0.419189	-0.745361	-173.871	-48.3694	63.7843	58.5422	-57.4139	11.0908	-167.323	86.803	88.5604	-97.1537	-17.748	35.5901	36.6375	45.1343	15.9962	-45.0334	-34.48	16.2468	-54.297	-5.34924
56.6919	28.4932	-21.015	30.6588	43.5194	53.7991	-28.6189	49.2007	26.8071	7.35669	-54.168	83.5674	68.9491	1.49731	7.64905	37.2463	24.1482	-135.202	68.2468	86.493	64.5549	54.5822	-230.013	-96.3464	-27.6042	155.227	-20.845	-0.743774	-0.804077	-175.465	-48.3325	64.0294	58.9387	-56.8524	10.1749	-169.173	85.3823	88.209	-96.886	-17.4618	33.9318	36.0659	44.4955	15.2303	-44.9725	-34.6423	15.6744	-54.1738	-5.36255
56.7681	28.7094	-21.2893	30.8726	43.7281	54.5001	-29.0482	49.6511	27.5854	7.44678	-53.7883	84.2396	69.197	1.68237	7.2467	38.3073	24.2979	-136.527	68.2676	87.0598	65.4342	55.5862	-230.151	-96.6174	-27.0957	154.864	-21.0935	-1.0498	-1.40247	-177.369	-48.278	64.4659	59.9346	-56.5369	9.49304	-171.136	85.2321	87.0377	-96.7344	-17.5647	33.2648	35.5782	44.2628	14.5267	-44.6838	-34.6274	15.4529	-54.1193	-5.4054
56.8323	29.1038	-22.4216	31.358	43.5187	55.1117	-29.1655	50.0645	28.241	7.59241	-52.8652	84.6916	69.286	2.34631	6.85522	39.114	23.9523	-137.342	68.173	87.6215	66.4614	55.67	-231.097	-96.7012	-26.4979	154.468	-21.2319	-1.13135	-0.743164	-178.462	-47.7606	65.2499	59.5243	-56.35	8.2981	-171.649	87.098	85.8234	-96.7661	-17.943	32.6095	34.3799	44.0094	13.9791	-44.7036	-34.9451	15.1831	-53.7488	-4.84766
56.6774	29.3778	-24.2031	31.8041	43.3527	55.4681	-29.366	50.5406	28.5875	7.77209	-52.6742	85.0621	69.4677	2.85046	6.66553	39.1011	23.6783	-137.682	68.1371	88.2103	66.9348	56.3475	-231.906	-96.9902	-25.4069	154.156	-21.3813	-1.77271	-0.924683	-180.101	-47.4349	65.675	60.3015	-56.2467	6.21545	-172.567	88.0135	84.2994	-97.0476	-18.126	32.4277	33.127	43.4758	12.4626	-44.7385	-35.1908	15.3811	-53.4813	-3.91565
56.6564	29.5837	-25.3313	31.8857	43.3064	55.8557	-29.9309	51.0415	28.6836	8.00134	-52.316	85.6276	69.5792	4.19568	6.63647	38.9359	23.6798	-138.168	68.2408	88.7875	67.517	57.1213	-232.317	-97.0007	-24.6704	153.976	-21.4193	-2.07629	-1.52966	-181.98	-46.8209	66.4581	61.0615	-56.2621	4.2605	-174.465	88.8936	83.3146	-97.2527	-18.4713	32.6136	32.5741	43.3265	11.4271	-44.353	-35.3088	15.3551	-52.7761	-3.6189
56.7284	29.6207	-25.8259	32.2882	43.2303	56.4178	-29.9888	51.3079	28.5813	7.85486	-52.2009	85.8086	69.7217	4.82629	6.69849	38.6595	23.9078	-139.608	68.2378	89.8069	68.0356	57.9675	-233.25	-94.7302	-24.1075	153.786	-21.4558	-2.24341	-1.55225	-183.461	-46.4418	66.5151	61.5629	-56.8395	3.76318	-176.654	89.0963	82.5909	-97.5804	-18.8318	33.4801	32.3871	43.463	10.4341	-44.0857	-34.5769	16.2076	-52.2888	-3.65308
56.7129	29.571	-26.6029	33.0228	43.3994	57.0704	-29.6869	51.5048	28.7438	7.5448	-51.9861	85.6827	69.8384	5.18201	6.93359	38.6091	24.199	-141.009	68.2849	90.4529	68.5586	58.3773	-233.682	-94.5986	-23.0006	153.674	-21.48	-2.62048	-1.53857	-185.05	-45.6742	67.1423	61.6555	-57.3514	2.52673	-177.412	89.8333	82.3357	-97.861	-19.3138	35.1185	30.9391	42.9457	9.82239	-43.5905	-34.2205	18.0242	-51.6493	-2.57153
56.4956	29.5374	-28.6097	33.4081	43.3511	57.5449	-29.1962	51.9081	28.8561	7.10706	-51.2833	86.306	69.9064	5.14673	6.86609	39.0399	24.4603	-141.472	68.2725	92.022	68.7023	58.1216	-234.727	-94.427	-22.1517	153.556	-21.6284	-3.06543	-1.49902	-186.234	-45.4601	68.5704	62.0608	-58.019	1.26172	-178.384	90.5426	81.4792	-98.1869	-19.9568	35.6708	30.4386	42.5204	9.0127	-43.1575	-32.7396	19.4829	-51.51	-3.08154
56.3907	29.6167	-30.2234	34.1678	43.3047	58.0309	-29.3008	52.2025	28.8127	6.49512	-50.635	86.7842	70.4612	5.52454	6.73743	39.8385	24.3882	-141.612	68.2848	92.7133	69.0349	57.0868	-235	-94.228	-21.8944	153.652	-21.1202	-4.10571	-1.84192	-189.235	-44.5463	69.2994	62.0912	-58.5006	-0.186646	-180.217	91.05	79.8182	-98.218	-20.5852	37.5387	28.9551	41.7186	7.37329	-42.337	-31.6291	20.041	-50.658	-3.18005
56.0347	29.5587	-31.0576	33.9844	43.1525	58.1006	-28.9736	52.7932	28.8378	6.22644	-50.2566	87.7627	70.9258	6.03198	6.45386	40.5948	24.3086	-143.676	68.4396	92.7964	69.7798	54.7703	-235.395	-94.3228	-21.2573	153.734	-20.8519	-5.0437	-2.49182	-190.411	-44.1279	69.554	62.0941	-58.6757	-0.56189	-181.347	91.4327	77.9957	-98.2466	-21.0034	37.9114	27.8477	41.1382	6.42542	-41.9139	-30.5958	20.3551	-49.848	-3.12024
55.7104	29.9756	-31.915	34.1084	42.8273	58.3069	-28.6064	53.3546	28.7523	5.7605	-49.6145	88.4266	70.5062	6.51001	6.19104	41.0713	24.174	-144.516	68.8726	94.5541	70.2552	53.1724	-235.931	-93.5183	-20.5686	153.925	-20.7515	-5.33704	-2.99548	-191.449	-43.6904	69.5044	62.3053	-59.4851	-1.01892	-181.685	91.2719	76.4382	-98.2114	-21.109	40.2516	27.8702	41.5691	5.64893	-41.3241	-29.5391	20.9572	-49.3585	-3.60205
54.7251	30.1996	-32.627	34.1459	42.2654	58.5573	-28.3777	53.5754	28.9915	5.11816	-48.9331	88.8842	69.9727	6.78394	6.18604	41.5654	24.4363	-145.068	68.755	95.9622	71.1611	52.5743	-236.013	-93.1418	-19.9601	154.309	-20.0199	-5.56067	-3.1073	-192.812	-43.6063	69.4355	62.3391	-60.375	-1.72522	-183.119	91.2092	76.0107	-98.2596	-21.6285	41.6649	27.0427	41.7393	5.09631	-41.2075	-27.3649	21.2081	-49.0615	-3.85681
53.6442	30.6876	-33.7808	34.0197	41.8201	59.0925	-27.5809	53.7683	29.5436	4.25024	-48.4331	89.5547	69.6896	7.21472	6.16284	42.8949	24.6356	-145.596	68.3243	96.7368	72.4628	52.1528	-235.795	-93.0029	-19.2761	154.386	-19.4313	-6.23132	-3.52002	-195.148	-43.3916	69.5692	62.5519	-61.1986	-2.19641	-185.84	91.6338	75.392	-98.6387	-22.1061	41.6122	27.02	42.2927	4.36621	-41.0514	-25.2533	21.671	-48.7931	-3.79761
52.8096	31.6746	-33.9539	34.0055	41.5076	59.6343	-27.2197	54.4827	29.8743	3.80139	-48.1547	90.4587	69.3687	7.13208	6.07507	44.3497	25.1163	-146.419	68.2333	97.5333	73.7523	51.4976	-235.043	-93.0584	-18.4814	154.73	-19.2506	-6.96021	-4.04517	-196.061	-43.3094	69.7466	62.64	-62.8025	-2.80188	-186.757	92.1133	73.3535	-99.2123	-22.3466	41.5564	25.4551	42.4139	2.87476	-40.7567	-23.2308	21.9337	-48.3099	-3.74561
52.9899	32.7047	-34.5538	33.8113	40.7394	59.6584	-26.7002	54.9968	29.9873	3.81555	-48.2263	90.8944	69.14	6.55298	6.2616	45.6637	25.9025	-146.833	68.0559	97.4863	75.4362	50.3662	-234.229	-92.9668	-17.7133	154.896	-18.9945	-7.5675	-5.43652	-197.852	-43.4421	69.6704	62.777	-64.297	-4.04004	-187.537	91.8279	71.8696	-99.2012	-22.3544	40.954	23.7899	42.3931	2.23633	-40.5748	-22.2063	21.9316	-47.5485	-4.5332
53.1638	33.1201	-35.0369	33.5732	40.1034	60.3495	-26.1432	55.8411	30.4689	3.35339	-48.3555	91.3689	68.5607	6.33008	6.57092	46.7313	26.281	-147.663	68.212	98.8999	75.8457	48.5332	-233.31	-92.8569	-16.9208	155.454	-18.8958	-7.93689	-6.06763	-200.544	-43.2191	69.5574	62.9855	-66.1263	-5.42554	-189.069	91.4336	71.7725	-98.619	-22.5355	41.1665	23.2145	42.373	1.24756	-40.4031	-20.4161	21.9213	-46.9915	-3.96387
52.9935	33.1418	-35.366	33.502	39.606	61.0813	-25.2369	56.6731	30.6628	3.14368	-48.3733	92.0997	67.7349	6.37329	6.91626	47.7329	26.4452	-148.635	68.1826	99.9393	76.5703	47.8522	-232.371	-92.9297	-15.9946	156.027	-18.7896	-8.21057	-7.12683	-200.676	-43.2271	68.9844	62.9746	-67.0887	-6.33997	-192.355	91.5186	70.3054	-98.7889	-22.6289	41.1365	22.4473	42.4155	-1.0144	-40.4885	-20.824	21.6436	-46.7815	-3.60132
52.6842	32.9637	-35.6899	33.043	39.1991	62.0593	-25.1287	57.2544	30.827	2.6748	-48.4525	92.9639	66.5193	6.36902	7.38684	48.7504	26.7202	-148.738	68.1115	100.594	77.0448	47.493	-231.53	-93.1179	-15.4745	157.233	-18.7632	-8.60791	-7.98694	-202.358	-43.6497	68.2478	62.8569	-68.3417	-6.80005	-192.672	91.894	69.1227	-98.6279	-22.6517	41.1554	20.9866	42.4197	-3.25305	-40.4786	-21.6284	21.9683	-46.5242	-3.48328
52.834	32.8279	-36.0717	33.137	38.7017	62.5425	-25.1023	57.9086	30.9636	2.6377	-48.3743	93.5801	65.9945	6.21753	7.96741	49.6339	26.9897	-149.424	68.1796	101.099	77.5361	47.1771	-231.005	-93.4725	-14.7532	158.29	-18.6201	-9.35596	-8.63684	-203.817	-44.6283	67.3733	62.9965	-69.3409	-5.76587	-193.463	92.3519	68.3784	-98.6183	-22.7837	41.4277	20.1289	42.3824	-3.58447	-40.5939	-24.2283	22.2592	-46.1366	-3.24792
52.6787	32.6659	-36.7117	33.2135	37.7075	62.6775	-25.4006	58.7782	30.9852	2.6261	-48.2878	94.5164	65.6997	5.97754	8.42102	51.0591	27.0942	-151.145	68.2969	101.758	77.91	47.0814	-230.05	-93.6846	-14.1923	157.91	-18.5438	-10.1055	-8.92041	-204.945	-45.6622	66.6832	63.0665	-70.4479	-4.8457	-195.7	92.2083	67.4547	-99.0284	-22.8478	41.7723	18.9128	41.7667	-3.54358	-40.51	-25.8091	22.6104	-45.7305	-3.18872
52.3606	32.5835	-37.2828	32.8246	37.1827	62.4838	-25.5023	59.1183	31.2753	2.60071	-47.8263	94.8728	65.6489	5.7533	8.82861	51.6661	26.9045	-152.381	68.5964	102.017	78.1669	46.5331	-229.93	-93.7412	-13.3478	157.909	-18.6937	-10.6027	-9.2533	-205.921	-48.1952	66.2369	62.9939	-71.0823	-3.80896	-197.469	92.4182	66.5057	-99.1736	-22.7465	42.4954	18.4069	41.3082	-4.94788	-40.6182	-26.2413	22.8345	-44.9731	-3.11096
52.2372	32.5062	-37.2084	32.1914	36.198	62.3065	-25.981	60.4404	31.3657	2.70874	-47.1483	95.4503	65.6162	5.72437	8.95557	52.5425	26.5588	-153.148	69.3264	102.902	78.5072	45.7852	-229.017	-93.573	-12.4237	158.333	-18.861	-10.874	-9.71863	-207.225	-49.2439	65.9335	62.5377	-72.6588	-2.76074	-197.82	92.1063	65.7745	-99.2117	-22.6157	42.9498	18.2692	40.6577	-6.93298	-40.5262	-25.3279	23.0382	-44.4867	-3.16858
51.9781	32.8403	-37.093	31.9106	35.6636	62.2262	-26.4677	61.5352	31.4561	3.07129	-46.498	96.2993	65.6469	5.33423	9.15503	53.6085	26.2469	-153.809	69.7928	103.946	79.2181	45.5953	-227.84	-93.6639	-12.1166	158.437	-18.8696	-11.6085	-10.0916	-208.949	-50.1016	65.8016	62.282	-73.4478	-2.01843	-197.917	91.8914	64.2451	-99.3718	-22.4204	43.2783	17.4611	40.8137	-8.27991	-40.5833	-24.8077	23.3848	-43.8092	-3.14136
51.9775	33.6798	-37.0555	31.6177	35.5018	62.1345	-26.7722	62.6104	31.9856	3.46985	-45.7781	97.2516	65.6877	4.98853	9.46838	54.6675	26.1743	-155.03	70.4148	105.173	79.6676	45.9897	-226.765	-93.8066	-12.1702	158.452	-18.7722	-11.9845	-10.1349	-211.262	-50.4248	65.5382	62.1213	-74.7416	-1.30078	-198.629	92.1143	63.8256	-99.7428	-22.3517	43.7947	16.6991	40.3134	-8.68701	-40.5424	-25.0686	23.5157	-43.4564	-2.9032
51.9471	34.3914	-37.0687	31.5034	35.5518	62.0856	-26.9159	62.9927	32.5289	3.78247	-44.6117	97.903	65.751	4.58337	9.90002	55.8635	26.3166	-156.19	70.9393	105.808	80.4423	46.3712	-226.659	-93.7714	-11.7847	158.538	-18.4436	-12.2025	-10.6415	-211.82	-50.8125	65.5266	62.1362	-76.4236	-0.627441	-200.095	91.9475	62.4136	-100.116	-22.3652	44.0391	16.4124	39.6429	-9.22583	-40.5012	-24.8562	23.5009	-42.8851	-2.87195
51.7697	34.5848	-36.8699	31.045	35.8152	61.739	-26.9536	63.5406	33.0717	3.62781	-43.9235	98.379	65.941	4.75842	10.223	57.7627	26.3916	-157.637	71.1558	106.416	80.8672	46.7808	-227.363	-93.8694	-11.7407	158.573	-18.3333	-12.5942	-11.1216	-212.683	-51.2628	65.585	61.3231	-77.2992	0.197754	-202.117	91.9165	61.2697	-100.745	-22.2709	44.5334	16.3496	39.7604	-9.64819	-40.3431	-25.7195	23.4618	-42.0548	-2.53625
51.7084	34.8193	-36.5591	30.6572	36.2385	61.2263	-26.9156	64.6207	33.5101	3.64636	-43.4609	99.1233	66.1792	4.51892	10.6339	58.7433	26.542	-158.499	71.7115	107.653	81.3573	47.2672	-228.962	-93.7021	-10.9203	158.927	-18.2625	-13.2101	-11.4814	-214.201	-52.2544	65.5841	60.9458	-77.9403	1.05444	-203.283	92.1102	60.1666	-100.9	-22.0477	44.818	16.8035	39.047	-10.1898	-40.3347	-26.7474	23.3799	-41.6326	-1.37488
51.7533	35.7913	-36.1195	30.1838	36.8523	60.7491	-26.9397	65.392	33.6689	3.89636	-42.5194	99.6705	66.3455	3.70996	10.8588	60.2191	26.5715	-159.138	72.0999	108.861	81.6898	47.5631	-229.36	-93.7317	-10.422	159.505	-18.1896	-13.5101	-11.5132	-216.411	-53.002	65.5173	60.657	-78.6318	1.17004	-204.333	90.9683	58.3838	-101.048	-22.0776	44.959	17.9196	38.8104	-10.4779	-40.3116	-28.6311	23.3013	-41.4249	-0.508057
51.9283	36.3235	-35.4559	29.8777	37.0891	60.2614	-26.9176	66.4292	33.833	3.9751	-41.5591	100.065	66.798	2.41309	10.99	60.5873	26.6105	-160.99	71.8621	109.305	82.0028	48.4208	-231.445	-93.4299	-10.342	159.9	-18.0894	-14.27	-11.8614	-217.115	-53.3033	65.5111	60.5428	-79.6461	0.753174	-206.304	90.5018	57.8	-101.169	-22.1566	45.103	20.4027	38.4821	-11.2769	-40.3528	-29.8173	23.2759	-41.1621	-0.161377
52.1697	37.9327	-34.9485	29.5709	37.9934	60.1884	-26.8054	67.1786	33.9261	4.18933	-40.6523	101.305	67.6564	1.76624	11.1831	61.426	26.4232	-162.331	71.6814	110.058	82.215	49.1053	-233.337	-93.254	-10.3801	160.403	-17.8232	-14.9963	-11.7574	-218.397	-53.318	65.5151	59.9391	-80.345	0.365967	-208.792	89.6725	56.6328	-101.279	-22.1558	45.1309	21.1711	38.2341	-11.6648	-40.3879	-31.7296	23.3038	-41.2	0.280396
52.5238	38.276	-34.5732	29.2858	38.3131	60.2705	-26.785	68.3275	34.1221	4.37878	-39.7284	102.045	67.9446	1.17627	11.2085	63.3939	26.5823	-163.082	71.526	110.394	82.3055	50.1399	-235.109	-92.7749	-10.4603	160.947	-17.6681	-16.0065	-11.7522	-220.838	-53.2113	65.3302	59.5397	-81.2124	0.130493	-209.476	89.0579	56.1121	-102.108	-21.9568	45.0525	22.2577	37.6134	-12.068	-40.254	-31.5865	23.5089	-41.3335	0.627563
52.6255	36.8247	-34.0314	29.0989	38.7355	60.1334	-26.6523	69.1965	34.395	4.23279	-38.5157	102.671	68.943	1.03406	10.7949	64.5085	26.8888	-164.53	71.1592	110.904	82.1895	51.6372	-235.68	-92.854	-10.3701	161.432	-17.6927	-17.5316	-12.0841	-221.755	-53.1365	65.1584	59.5677	-82.6592	0.0441895	-210.224	87.7343	54.5491	-103.173	-21.7004	44.9746	22.1112	36.6655	-12.3594	-39.7744	-32.9209	23.7794	-41.4504	1.24121
52.8687	35.3945	-33.6469	28.6462	39.4603	60.1387	-26.576	70.2419	35.1038	4.12585	-38.1152	103.141	69.927	0.516968	10.2648	65.1771	26.9203	-165.377	71.0841	111.088	82.028	53.4352	-236.252	-92.8049	-10.2938	162.486	-17.5748	-18.9536	-12.3191	-222.75	-52.9919	65.0499	60.0078	-83.7206	0.0413818	-211.189	86.8002	52.8848	-104.133	-21.432	44.7397	21.958	36.4259	-12.7615	-39.5885	-33.3641	24.3732	-41.4185	1.96265
53.0039	34.2832	-33.0133	28.3618	39.5676	59.7388	-26.5514	71.8567	35.4674	3.94604	-37.3838	103.551	70.9547	-0.952148	9.26514	65.7988	26.2437	-166.949	70.9976	111.271	82.0886	55.1122	-236.267	-92.6685	-10.4789	163.192	-17.4246	-19.5442	-12.5734	-224.425	-53.0793	64.9612	59.7454	-84.8984	0.626099	-212.509	85.6761	51.3331	-104.282	-20.5121	44.2573	21.9493	35.4711	-13.1492	-39.8309	-34.1991	24.6372	-41.3514	2.37354
52.8986	34.0183	-32.5529	28.2415	39.55	59.5531	-26.6873	72.4158	35.9204	3.90027	-37.0525	104.107	71.8644	-1.79333	8.40991	67.6832	25.0565	-167.891	70.8833	111.651	82.1289	56.3163	-235.926	-92.4807	-10.7843	163.779	-17.3191	-20.0555	-12.7543	-226.172	-53.0881	64.9901	59.8584	-86.1384	1.28552	-213.236	84.7328	50.8844	-104.451	-19.8123	43.6492	22.1654	35.1355	-12.9531	-39.9492	-35.5264	24.3074	-41.3173	2.61133
52.6975	34.0095	-30.7916	28.1416	39.4691	59.3234	-26.8323	73.657	36.8936	3.68201	-36.9966	104.796	72.6382	-3.17712	7.46301	68.7855	23.7502	-168.681	71.0054	112.069	82.3845	56.7203	-235.67	-91.5339	-10.9253	164.764	-17.1721	-20.3519	-12.0541	-227.907	-53.236	64.5865	60.7946	-86.713	1.97778	-213.86	84.424	49.9285	-104.638	-19.103	42.9963	22.7745	35.101	-12.4381	-39.913	-36.7224	24.8511	-41.5056	2.69348
52.6042	34.1508	-29.953	28.1071	39.0479	59.1614	-26.7706	74.5344	37.8333	3.35742	-36.9767	106.071	73.4663	-3.62354	6.8219	69.2295	22.7872	-169.005	70.8434	112.283	82.9001	57.8116	-235.31	-90.3042	-11.1398	166.464	-16.9083	-21.9916	-11.7482	-229.154	-53.9962	64.3899	62.051	-87.6553	2.79651	-214.574	83.7158	48.4725	-104.712	-18.2736	42.9955	23.3134	35.0728	-11.7437	-39.6339	-37.9307	24.3926	-41.6023	2.62146
52.371	34.2439	-27.7541	28.1925	38.7253	58.9836	-26.8121	75.2472	38.9193	3.38232	-37.0405	107.147	74.3851	-4.2251	5.93152	69.8317	21.0419	-169.788	70.6182	112.497	83.7075	58.8931	-235.137	-89.741	-11.5306	167.946	-16.4521	-23.2734	-10.7451	-230.185	-54.6976	64.1622	63.0208	-89.2612	3.4552	-215.935	82.7822	45.8846	-104.24	-17.2998	43.3647	24.4297	35.0233	-11.1658	-39.2775	-39.6686	24.1692	-41.6898	2.75854
52.1646	34.3436	-26.8362	28.1827	38.592	58.4281	-26.8955	76.3168	39.715	3.35767	-37.2571	107.813	75.2459	-5.54163	4.69971	70.1644	19.9017	-170.492	70.3999	112.735	83.8923	59.5345	-234.689	-89.4669	-12.0594	168.558	-16.118	-23.9701	-9.91064	-231.232	-54.5494	63.3406	63.5535	-89.5779	4.08105	-216.94	81.5375	45.5648	-103.122	-16.7451	43.7444	25.4865	34.8394	-10.63	-38.5452	-40.9779	24.1207	-41.7186	2.73022
51.9404	34.507	-26.179	28.2462	38.4574	57.9951	-27.3293	77.5299	40.4719	3.8468	-37.6191	108.645	75.7467	-6.75061	3.10657	70.45	18.7507	-171.447	70.323	113.011	85.1289	60.2198	-234.722	-89.1494	-12.1786	169.098	-15.7841	-24.2302	-9.18469	-232.383	-55.0746	62.9446	63.7346	-90.0955	5.52332	-218.002	80.6105	45.1412	-102.236	-15.9374	44.6436	26.725	34.7627	-9.69116	-38.3899	-41.7899	24.0946	-41.108	2.84644
51.5737	34.4866	-25.7489	28.1737	38.2773	57.4822	-27.6028	78.3071	41.7811	4.47595	-38.3068	109.252	76.3739	-7.474	1.45862	70.7815	17.4622	-173.473	69.9812	113.443	85.7908	60.7551	-234.898	-88.821	-13.1656	170.197	-15.4847	-24.4282	-9.0293	-232.836	-55.5513	62.9919	64.4677	-90.4104	6.75037	-220.054	79.7207	44.3231	-102.037	-15.7991	44.6503	26.561	34.6672	-8.73291	-39.5385	-42.7789	24.0518	-41.2429	2.86206
51.3469	33.7344	-25.2825	28.2928	38.2186	57.2245	-27.8749	79.2023	42.6605	4.89697	-38.5646	109.49	76.6748	-7.8717	0.44751	70.8978	15.6504	-175.381	69.3683	113.587	86.7711	61.2156	-235.229	-88.2988	-13.6595	170.9	-15.3384	-24.6423	-9.09546	-233.745	-56.6722	62.6674	64.847	-90.7341	7.58887	-220.854	78.8595	43.3246	-102.183	-15.6855	44.854	26.7441	34.2587	-8.2926	-39.9084	-45.0493	23.9839	-41.2563	2.88049
51.2678	31.8243	-25.007	28.3376	38.1547	56.8241	-28.3131	80.0387	43.4313	5.10046	-39.4836	110.171	77.4064	-8.29431	-0.104736	70.6718	14.4659	-175.935	69.1006	114.033	89.0305	61.4178	-236.385	-87.2314	-14.3519	172.324	-15.4845	-25.0952	-9.15015	-235.503	-57.1722	61.9094	64.8709	-90.9972	8.72095	-221.516	77.7986	40.3658	-102.337	-15.5079	45.7013	26.7042	34.0282	-8.021	-40.3562	-46.1812	24.0028	-40.9421	2.62598
51.2072	30.787	-24.8624	28.2018	38.0562	56.3728	-28.7063	81.3036	43.7808	5.12146	-40.3766	110.783	77.5941	-9.09668	-1.12488	69.9917	13.1758	-177.494	68.9451	114.567	89.9288	62.0508	-237.363	-86.1001	-15.1844	174.218	-16.0649	-25.5984	-9.25293	-236.651	-57.3793	61.1227	65.4512	-90.9146	9.18738	-223.13	76.7958	40.3297	-101.789	-15.0531	45.7129	26.7109	34.2656	-7.69458	-40.9374	-46.8291	23.9521	-40.6703	2.50073
51.3868	30.127	-24.6063	28.2545	37.9995	56.1024	-29.5571	82.4093	43.912	4.84326	-41.2081	111.482	77.6725	-10.2632	-2.31274	69.2847	12.1505	-179.427	68.7637	114.443	90.679	62.6809	-238.603	-85.6151	-15.8092	175.624	-16.21	-25.9301	-9.31128	-237.281	-58.4047	61.0284	65.512	-90.8551	8.50171	-225.04	75.3688	39.2592	-101.877	-14.1916	45.4106	26.7247	34.3684	-7.02625	-42.1974	-48.0999	23.9265	-40.421	2.73706
51.5236	29.3564	-24.4202	28.3191	38.1533	55.9467	-30.3578	83.0636	43.9786	4.88232	-42.0946	112.163	77.802	-11.0123	-2.59961	68.0536	10.6351	-180.858	68.3579	114.199	92.4457	62.717	-240.13	-84.95	-16.0061	176.325	-17.1685	-26.2128	-9.44226	-239.14	-58.6501	61.0747	66.1746	-90.9503	8.28931	-226.473	73.5596	38.5977	-101.966	-13.8616	44.8804	27.0114	34.9758	-6.57104	-43.9148	-49.9957	23.9095	-39.8003	2.72412
51.8179	28.5237	-24.0721	28.1622	38.8844	55.7366	-31.0226	82.4984	43.6672	4.82251	-42.5956	112.394	77.696	-11.1827	-3.42798	67.7648	9.27466	-181.024	67.9753	114.125	93.3407	63.5337	-241.631	-84.6287	-17.0212	177.362	-17.851	-26.3624	-9.45544	-241.143	-58.8323	60.9742	66.6354	-90.9877	8.4856	-226.79	72.1108	36.6187	-102.29	-13.949	45.2458	27.8074	35.3423	-6.58789	-43.1053	-50.1835	23.7166	-39.7643	2.82666
51.989	28.0845	-23.5881	28.0253	38.8909	55.6652	-31.402	82.7272	42.9158	4.99146	-43.2335	112.717	77.5439	-11.8861	-4.14856	66.182	8.0166	-181.748	67.3938	113.647	94.8711	64.2491	-242.454	-84.3794	-17.9044	179.537	-18.187	-26.8379	-9.59033	-241.604	-59.3444	60.7261	66.9503	-91.1382	8.84192	-227.457	71.3846	35.7742	-102.565	-14.3195	45.4379	28.8499	35.959	-6.63928	-41.052	-51.2312	23.7822	-39.6967	2.98242
52.1064	27.0161	-23.1704	27.7958	39.1774	55.5356	-31.6603	83.2053	42.0055	4.60022	-44.2024	113.118	77.3276	-12.54	-4.65259	64.306	6.86584	-183.239	66.9413	113.108	95.3892	64.6738	-243.524	-83.7391	-17.8916	180.833	-18.3082	-27.2112	-9.73096	-243.453	-60.4102	60.8015	67.2795	-91.2051	9.36475	-228.483	70.123	35.5438	-102.535	-14.0338	45.8097	30.5432	36.6929	-6.59326	-39.4788	-52.0109	23.5209	-39.7148	3.28027
52.2494	25.8031	-23.0271	27.7191	39.4315	55.573	-32.2682	84	41.5238	3.84045	-44.7874	114.247	76.9971	-13.179	-5.1615	63.7878	5.45081	-184.801	66.7148	112.752	96.7257	64.9027	-245.537	-82.1268	-18.4658	182.166	-19.0513	-27.2296	-9.67664	-245.159	-60.6025	60.9344	67.2336	-90.9059	9.87415	-229.949	68.8429	34.0129	-102.247	-14.131	47.1349	30.7573	37.0779	-6.61633	-38.7095	-54.3772	23.4691	-39.5057	3.55322
52.2028	25.99	-22.6373	27.3612	40.0328	55.9175	-32.5189	85.0626	40.5952	2.81592	-45.4739	114.944	76.7806	-13.4728	-5.90393	63.2241	3.92896	-186.027	66.4995	112.607	98.0265	65.2141	-246.563	-81.7939	-18.7906	182.716	-19.8801	-26.9347	-9.90259	-246.204	-61.312	61.0258	67.7489	-90.4822	10.6365	-231.303	68.1677	33.2281	-101.86	-13.761	47.7758	31.2943	37.1982	-7.00073	-37.9525	-55.2196	23.4467	-39.3654	3.84607
52.1421	25.2605	-22.108	26.8582	40.1761	56.1658	-33.5272	85.9911	39.3364	2.6427	-45.7317	115.519	76.4362	-13.7085	-6.49707	62.6578	2.55164	-186.659	66.3611	112.211	99.2662	65.7823	-247.801	-81.7825	-19.1753	184.326	-20.7489	-26.5802	-10.0988	-247.837	-62.9794	61.1591	68.0229	-89.8695	11.1648	-231.655	66.8494	32.4064	-100.742	-12.4395	49.4972	33.1334	37.3566	-7.44434	-36.6531	-55.955	23.8722	-39.2405	4.2948
51.7513	23.8435	-21.5001	26.7681	40.8562	56.3549	-34.3075	87.0121	38.2063	2.32007	-45.5879	116.26	75.8709	-13.7565	-6.70825	61.9487	0.950928	-187.585	66.1954	112.028	101.066	66.2189	-248.313	-81.5803	-19.4049	185.871	-21.301	-26.3148	-10.092	-249.783	-63.6328	61.2706	68.3754	-89.3148	11.4823	-232.503	64.7484	32.0463	-99.3624	-11.9579	50.3185	34.7161	37.4779	-8.146	-34.7693	-57.6187	24.2081	-38.9603	4.76465
51.0043	23.2439	-21.1786	25.9728	42.001	56.5591	-34.4877	87.1624	37.2028	2.42957	-45.2783	116.758	75.3553	-13.3644	-7.07751	61.5541	-0.84668	-188.546	66.1736	112.344	101.923	66.592	-249.036	-81.1646	-19.9735	187.731	-21.1764	-26.1514	-9.82678	-251.418	-65.4366	61.4159	68.4187	-88.933	11.74	-233.108	63.4171	30.7196	-98.3812	-11.0995	51.984	35.7471	37.4095	-8.89441	-34.5063	-60.1844	24.2241	-38.9347	5.00647
50.3457	22.8203	-21.3145	25.7146	43.7112	56.6772	-34.9717	87.3148	36.5454	2.57605	-45.0282	117.162	74.8073	-13.3237	-7.4552	60.9508	-2.07666	-189.405	66.4019	112.606	102.913	67.3464	-249.594	-80.7751	-20.5967	188.562	-21.5345	-26.1598	-9.70837	-252.376	-66.5011	61.7152	68.4125	-88.4042	11.9379	-233.109	63.1561	29.369	-98.0972	-10.3333	52.9214	35.8955	37.5447	-10.2053	-35.4484	-61.708	24.2721	-39.1211	5.16895
49.1151	22.3414	-21.0735	25.3535	44.0824	56.9646	-35.9106	87.7499	36.0078	2.86572	-44.9957	117.891	73.5582	-13.2144	-7.84509	59.7504	-3.0896	-189.621	66.6898	112.853	103.833	67.7679	-250.119	-80.6759	-20.4608	189.454	-21.8949	-26.3372	-9.66943	-254.056	-68.0686	61.7456	68.5184	-87.6882	12.4443	-233.948	61.6765	28.4634	-97.597	-9.75659	53.7015	36.0471	37.7694	-11.3082	-35.6313	-62.8341	24.2179	-39.0603	5.16492
48.8729	21.2014	-20.9747	24.703	44.5079	57.4731	-36.1578	88.3389	35.0189	2.97668	-45.0681	118.982	72.2225	-13.1693	-8.01514	59.3317	-4.84045	-190.464	66.8491	112.922	104.725	68.2821	-250.412	-80.4292	-20.8805	190.443	-22.075	-26.7239	-9.68689	-255.318	-69.1389	61.707	68.5961	-87.3308	13.0692	-235.174	59.8618	27.3462	-96.8701	-8.44397	54.4487	36.1124	37.9337	-14.011	-35.39	-64.3256	24.6647	-39.0092	5.16003
48.6758	19.4347	-21.0052	24.2278	45.1849	58.0865	-36.9272	89.7743	34.1849	3.00293	-45.3979	119.603	71.8344	-13.3392	-8.52515	59.048	-6.66541	-192.018	66.948	112.312	105.872	69.1509	-250.868	-80.1852	-21.5668	192.376	-22.1663	-26.8555	-9.75305	-257.304	-69.6903	61.3818	68.6484	-87.2841	13.4641	-237.501	59.0728	27.0664	-96.2131	-7.3313	54.3746	34.7336	38.1403	-14.5726	-35.0469	-66.5461	25.2241	-38.6307	5.14636
48.2025	19.2947	-21.1489	24.0702	46.2244	58.6187	-37.6559	90.5905	33.2011	2.86072	-45.7292	120.53	72.0959	-13.37	-8.90051	58.3656	-7.98413	-193.061	67.3236	112.095	106.439	69.7513	-251.087	-79.7292	-21.999	193.246	-22.5078	-26.2904	-9.66138	-258.139	-70.8381	61.2048	68.6735	-86.7882	14.0322	-238.75	58.9486	25.7247	-95.8221	-6.85803	55.1782	33.978	38.2544	-14.2476	-34.2686	-67.6227	25.7596	-38.5321	4.87183
47.4348	19.1724	-21.6794	23.7278	46.9734	58.9236	-38.1599	91.1901	32.3912	2.30359	-45.7031	121.01	72.3345	-13.3752	-9.33191	56.8441	-8.2821	-193.385	67.5116	111.734	107.76	70.0104	-250.601	-79.6069	-22.6614	194.083	-22.5829	-25.2114	-9.57471	-258.505	-71.6466	61.3025	68.92	-86.1831	14.5249	-239.12	58.7937	24.2804	-94.9824	-6.55127	55.2954	32.2198	38.6739	-15.1951	-33.5996	-68.7153	26.0342	-38.6564	4.4248
46.3402	18.2522	-22.0989	23.303	47.9889	59.2897	-38.2328	91.5347	31.9171	1.81433	-45.7382	121.399	72.2452	-13.3704	-9.34778	55.8706	-8.85974	-194.9	67.5455	111.896	108.748	70.6444	-249.705	-79.0182	-22.8875	195.818	-22.5941	-23.9733	-9.45154	-259.228	-72.4023	61.3689	69.2322	-85.6777	15.5569	-239.868	58.6311	23.2671	-95.0417	-5.52747	55.7041	31.3605	39.106	-17.543	-31.4265	-69.6019	26.249	-38.4854	4.4718
45.1561	17.0743	-22.1846	22.756	48.386	59.5769	-38.7037	92.0518	31.3151	1.03015	-45.6226	121.684	72.1278	-13.3517	-9.33728	55.252	-10.2578	-195.837	68.0325	111.695	110.553	71.084	-248.307	-78.5488	-23.3029	196.871	-22.6478	-23.1844	-9.26843	-260.171	-72.9944	61.3578	69.5552	-85.3806	16.1063	-240.956	58.9106	23.1531	-95.1624	-5.39429	55.9932	29.8765	39.5167	-19.2213	-29.3954	-71.2251	27.2043	-38.6652	5.06287
44.1674	16.011	-22.5636	22.3438	48.8176	60.1267	-39.4072	93.7289	30.9441	0.13562	-45.8544	122.223	72.0364	-13.1754	-9.09888	54.8337	-11.9563	-197.058	68.2994	111.392	111.047	71.4763	-247.145	-77.649	-24.0584	197.733	-22.7134	-22.6053	-9.32861	-261.176	-73.4731	61.1238	69.6001	-85.5548	17.2292	-242.746	59.4695	22.0945	-94.766	-5.49353	56.0989	28.0616	39.6736	-19.7518	-28.7775	-72.4695	27.3202	-39.1774	5.25037
43.8492	15.9467	-23.4657	22.2848	49.5721	60.8201	-39.537	95.0879	30.1744	-1.07507	-46.2478	122.793	71.6572	-12.9515	-8.78992	54.5648	-12.6401	-197.263	68.7802	111.17	112.72	71.8619	-246.518	-76.9952	-24.4854	198.767	-22.5815	-21.5824	-9.19995	-261.421	-74.4821	60.7935	69.751	-85.7449	17.5271	-243.565	59.5022	19.7866	-94.4852	-7.86694	55.9529	27.4088	39.634	-20.3951	-28.1901	-73.744	27.4158	-39.4458	5.19397
43.495	15.8674	-25.2699	21.8314	49.9867	61.0378	-39.795	95.7047	29.5593	-1.93079	-45.9211	123.086	71.7111	-12.5055	-8.27722	53.5448	-13.4327	-198.279	69.0865	111.001	114.298	72.1127	-245.982	-76.9268	-24.8176	200.634	-22.4868	-20.5103	-9.27539	-261.703	-74.7853	60.5498	70.0613	-86.4127	18.7004	-244.845	59.7649	18.376	-93.9578	-9.31458	55.4163	26.8214	39.3596	-20.793	-28.3007	-75.1252	26.9983	-39.7585	4.88062
42.2854	15.6038	-27.2798	21.5984	50.6246	61.6555	-39.0037	96.0487	29.0288	-3.04907	-45.6984	123.586	71.416	-11.752	-6.94836	53.0385	-15.0221	-198.888	69.3842	110.869	115.038	72.2297	-245.391	-76.701	-25.5782	201.839	-22.3918	-19.6737	-9.41321	-262.134	-75.722	60.351	70.2184	-87.7386	19.6493	-246.677	59.6302	18.7732	-93.1844	-10.6033	54.9335	27.4026	39.317	-21.6858	-28.8861	-76.3447	27.0159	-41.3905	4.64832
40.899	15.7621	-28.0291	21.5509	51.2141	62.5214	-37.146	96.3674	28.8444	-3.64087	-45.2739	123.982	70.7185	-11.1431	-6.06372	53.1755	-16.4154	-199.956	69.1904	110.833	116.435	72.4432	-244.887	-76.4227	-26.4224	202.344	-22.2993	-18.66	-9.55139	-262.353	-76.5282	59.9196	70.5726	-89.2263	20.0374	-248.893	59.2164	17.7644	-92.8153	-11.9609	54.3125	27.8124	39.3168	-22.421	-29.8243	-77.0959	27.1809	-43.3384	4.62524
40.2545	15.6982	-28.1315	21.7677	52.2838	63.2345	-35.5193	97.7072	28.886	-4.00854	-45.6178	124.376	70.3722	-10.5742	-5.40576	53.3837	-16.9702	-200.612	68.9067	110.709	117.456	72.7958	-244.834	-75.874	-27.2974	203.034	-22.1067	-17.7952	-9.51733	-263.063	-76.848	59.6689	70.6266	-89.6583	20.2955	-250.009	58.9366	15.411	-92.3566	-13.4988	53.7852	27.1605	39.4194	-22.8546	-32.0216	-77.3097	27.6309	-44.6619	4.69934
39.7272	15.7045	-28.3865	22.2676	53.0175	63.5277	-34.8851	98.8311	29.0243	-4.63367	-45.6168	124.677	70.3051	-9.81531	-4.73877	53.4683	-18.3732	-201.119	69.1476	110.624	118.583	73.3207	-245.133	-75.4473	-27.8408	203.985	-21.9948	-16.3824	-9.55664	-264.86	-77.2236	59.1437	70.4302	-90.4496	20.5702	-251.961	58.3264	13.7578	-91.9308	-15.0841	53.3669	26.5978	39.7689	-23.8613	-34.2842	-77.4712	28.0944	-44.6213	4.95959
39.448	15.73	-29.2716	23.2716	53.5342	63.8572	-34.1739	99.3417	29.0879	-5.05603	-45.6885	125.115	70.269	-9.33008	-3.44421	53.5857	-20.2982	-202.041	68.6611	110.616	119.617	74.1506	-245.038	-75.1123	-28.4952	205.358	-22.0485	-15.5095	-9.62683	-266.493	-77.4716	58.8287	70.1968	-92.2791	20.835	-253.383	58.3009	13.6145	-91.5808	-15.1149	53.2167	27.3088	40.1735	-24.0616	-34.0184	-78.0751	29.1669	-44.2263	5.68518
39.1046	15.6742	-30.5885	23.5873	54.1985	64.2382	-33.9465	99.6689	28.8192	-5.11133	-45.5344	125.441	70.355	-9.00134	-2.48499	53.9393	-21.6216	-202.995	68.4863	110.618	119.844	74.5441	-244.999	-74.2927	-28.899	206.763	-22.1844	-14.9774	-10.123	-267.083	-78.1209	58.3522	69.5808	-93.1614	21.0824	-254.984	58.4935	13.5479	-91.0326	-15.0479	52.7537	28.5782	40.7194	-24.2181	-34.2036	-78.441	29.645	-43.8163	5.88147
38.6823	15.8356	-31.4188	24.2344	55.6687	64.3374	-33.6879	100.079	28.2979	-4.9856	-45.0732	125.655	70.329	-8.19336	-1.53967	54.3297	-22.516	-203.526	67.9089	110.588	120.406	75.0424	-244.609	-73.6245	-29.4763	207.448	-22.4243	-14.2255	-10.381	-268.717	-78.4384	57.8414	68.976	-93.9995	21.6075	-255.528	58.5857	11.754	-90.8328	-15.1136	51.5771	29.1149	41.0784	-24.4912	-34.4707	-77.9241	29.6517	-43.6239	7.52478
38.3949	15.9352	-32.4829	24.5996	56.2361	64.5562	-33.3723	100.457	27.2407	-4.88635	-44.6079	126.198	70.3546	-7.49841	-0.494141	55.1957	-23.6317	-203.79	67.6929	110.477	121.151	76.4363	-245.177	-73.6465	-30.058	208.713	-22.869	-12.2115	-9.94067	-270.787	-78.7731	57.3109	67.5614	-94.5768	21.8302	-256.318	58.5134	9.93542	-90.923	-15.0317	50.7163	29.3381	41.1559	-24.8458	-34.803	-76.886	28.3146	-43.6893	9.01709
37.9525	16.2524	-33.0179	24.583	57.2738	65.077	-32.6318	101.3	26.5588	-4.8064	-44.3687	126.606	70.3762	-7.09167	1.18494	56.1869	-25.6658	-203.859	67.1044	110.48	122.333	76.8878	-246.238	-73.9591	-30.3154	210.961	-23.3065	-11.2151	-10.0013	-272.143	-78.7961	57.0114	67.0856	-95.927	21.9994	-257.497	58.2942	9.64111	-90.8826	-15.0391	49.5302	29.1288	41.3528	-25.7942	-34.4067	-76.4774	27.9254	-44.3069	9.53125
38.3694	17.0719	-33.4554	24.58	59.3452	65.8433	-32.1725	101.8	25.5483	-4.35229	-44.4331	127.204	70.6865	-6.5426	1.88501	56.8799	-27.1101	-202.66	66.6508	110.51	124.483	77.9745	-246.54	-73.5315	-30.4585	211.971	-24.0674	-10.606	-9.89307	-273.75	-78.9277	56.748	66.8271	-97.2333	22.005	-258.361	58.397	9.22375	-90.8514	-15.8302	49.2263	28.9647	41.6646	-26.2686	-34.3828	-75.5078	27.698	-44.5264	10.1089
38.8207	17.2875	-33.7549	24.5593	59.9573	66.1211	-31.5662	102.613	24.59	-4.03491	-44.535	128.391	70.8313	-6.43884	2.14331	58.9663	-27.7588	-202.353	64.7024	110.669	125.012	78.843	-246.589	-73.2772	-30.7358	212.588	-25.2416	-10.3027	-9.76147	-275.334	-79.2509	56.1056	66.1685	-98.0735	21.8634	-258.189	58.6294	8.91736	-90.3536	-18.2128	48.6306	28.5695	41.6796	-26.4069	-34.7042	-75.1056	27.891	-44.7839	10.2644
39.2983	17.6403	-34.6862	25.0137	60.7891	66.0759	-31.2653	103.253	23.2025	-3.94617	-44.5686	128.466	70.8495	-6.53516	2.4436	59.939	-28.631	-201.319	63.0643	111.205	126.381	79.2623	-246.794	-73.3013	-31.7877	213.463	-25.8248	-9.47766	-9.62451	-276.802	-79.8168	55.4919	64.3291	-98.6011	20.9218	-257.336	59.2788	8.99377	-89.6525	-19.4088	47.5283	27.8246	41.6924	-26.6664	-34.8359	-75.2974	27.924	-45.1302	10.4197
39.1918	18.3048	-34.7543	25.34	62.3787	65.8993	-31.2711	103.6	20.9619	-3.85034	-44.6664	129.491	70.9508	-6.38806	2.64246	60.7482	-29.5436	-199.803	62.3217	111.678	128.136	79.6313	-246.883	-73.4791	-32.3401	213.393	-25.9899	-8.88586	-9.10364	-279.062	-80.3141	55.1185	62.6129	-100.031	20.4524	-256.687	59.5029	8.89783	-88.7551	-20.1523	46.4208	27.875	41.5879	-27.0332	-34.7002	-74.6775	27.9592	-45.2404	7.98376
39.5094	18.6338	-33.5439	25.4929	63.3146	66.1422	-31.4963	104.505	20.2709	-3.51794	-43.6511	129.747	71.0775	-6.10803	2.99402	62.3184	-31.3092	-198.366	62.0137	112.114	128.713	79.6392	-247.508	-73.4326	-32.6381	214.603	-26.0278	-8.34058	-8.69641	-280.515	-80.8073	54.7803	62.811	-100.873	19.9141	-254.573	60.0609	8.76624	-88.0833	-22.3145	45.861	27.8668	40.9563	-27.7469	-34.3108	-74.4224	28.5181	-45.2914	6.87976
40.8866	19.1443	-31.4352	25.9337	63.6621	65.9755	-31.5569	105.722	19.2637	-3.32703	-43.5442	130.363	71.1711	-5.83105	3.17627	63.3311	-32.3611	-197.237	61.6971	112.824	129.88	79.4524	-248.309	-73.4271	-34.0857	215.68	-26.0696	-7.1062	-8.61584	-281.906	-81.5399	54.1975	61.7466	-102.869	19.7106	-251.594	60.1876	8.78857	-88.0043	-23.0343	45.4252	28.2023	40.9691	-28.0355	-34.2325	-74.6285	28.8947	-45.6738	5.76501
41.4562	19.5103	-30.5984	25.8463	64.8972	65.9895	-31.577	106.353	18.3378	-3.20618	-44.2222	130.528	71.3799	-5.66602	3.16211	64.0645	-33.9276	-196.741	61.9022	114.375	131.338	78.7521	-248.6	-73.88	-33.9724	216.153	-26.1591	-6.625	-8.07422	-283.054	-82.0898	53.597	61.1394	-103.935	20.0969	-250.388	60.5925	9.08643	-87.9468	-25.472	44.6132	28.1877	40.6776	-28.3475	-34.4886	-74.4604	29.3485	-45.958	5.46301
42.2627	20.0103	-29.9062	25.9283	65.3322	65.9963	-31.8428	106.985	16.9192	-2.81201	-44.7267	131.086	71.8374	-5.62927	3.03748	64.968	-35.4515	-195.574	62.0024	114.613	131.723	77.5636	-248.421	-73.8281	-35.687	216.164	-26.705	-6.04309	-7.58606	-284.555	-83.151	53.074	60.937	-104.142	20.3912	-249.065	60.798	9.59839	-88.0957	-25.7196	42.3595	28.5654	40.5134	-28.3888	-34.845	-74.5269	29.4756	-46.1409	4.98914
42.8517	20.5953	-29.1158	25.9418	66.3433	66.2316	-31.9093	107.555	16.3361	-2.4314	-44.7771	132.108	72.0624	-5.52148	3.08557	66.0039	-35.8729	-194.341	61.9869	115.622	132.694	76.5011	-248.099	-74.4225	-36.6537	216.045	-27.2877	-5.26465	-6.953	-286.781	-83.4086	52.9814	59.5061	-103.112	20.7572	-248.299	61.2418	9.81531	-88.7821	-28.4561	40.6929	29.0198	39.9071	-28.2006	-35.1661	-74.6179	29.6312	-47.7599	4.47961
42.8584	21.4955	-28.2197	26.0457	68.1798	66.2572	-31.837	108.059	15.9735	-2.13782	-44.3972	132.484	72.8945	-5.44666	2.98523	67.2877	-36.588	-193.506	61.9511	116.726	133.226	76.0848	-248.022	-75.231	-36.4116	215.75	-27.8511	-3.40369	-6.73047	-288.423	-84.6881	52.345	58.9839	-102.971	20.8954	-247.895	61.6892	11.0321	-89.9252	-29.3733	40.2097	29.2167	39.3112	-28.1702	-35.1235	-75.0698	29.8328	-49.4927	4.61914
42.7737	22.0508	-27.3196	26.0444	69.0919	66.2808	-31.2814	108.594	15.8414	-2.04504	-43.7803	132.679	73.7561	-5.50049	2.37378	68.671	-38.1478	-193.409	61.8083	117.676	134.022	76.2781	-248.325	-75.3613	-36.2025	215.032	-27.8804	-2.55042	-6.16565	-288.904	-85.5369	51.7148	58.3077	-101.895	20.8845	-247.048	62.4054	12.0398	-90.3536	-30.3978	39.0487	29.9025	38.9548	-28.2992	-35.1713	-75.1533	30.0195	-49.3577	4.71606
42.4077	22.531	-26.2272	26.0283	70.1526	66.1481	-31.0737	109.056	16.1987	-2.09448	-43.4207	133.121	74.3948	-5.69043	1.25354	69.6469	-39.4521	-192.465	61.8424	118.077	134.643	76.5518	-249.391	-76.0009	-36.2301	214.599	-27.864	-2.29688	-5.46863	-289.862	-87.2668	50.91	57.9868	-100.299	20.9337	-246.474	62.5186	13.3829	-90.3911	-31.2809	37.5781	30.0553	38.7247	-28.4264	-35.2147	-75.0273	30.0054	-50.0992	4.86523
42.0789	23.1888	-25.9231	25.42	71.1158	66.5774	-30.7355	109.551	16.6088	-2.39661	-42.9387	133.209	74.8944	-5.72986	0.654785	70.859	-40.5645	-191.391	61.7822	118.578	135.702	76.6902	-249.85	-76.0311	-36.2047	214.007	-28.0382	-1.73267	-4.64526	-292.005	-87.9292	50.5388	58.0659	-99.5616	20.9855	-246.389	62.7206	13.7936	-89.5469	-31.8815	36.416	29.4508	38.4778	-28.3409	-35.0231	-75.0131	30.2474	-50.5654	4.69299
41.9047	23.74	-25.4539	24.9819	71.8809	67.0428	-30.196	109.691	17.4471	-2.81592	-42.5577	133.004	75.1063	-5.61267	-0.120117	71.3077	-41.7094	-190.659	60.8722	119.686	136.68	76.7533	-250.161	-76.7123	-36.8075	213.119	-28.1281	-0.443359	-4.1709	-293.425	-88.8562	49.5156	58.0724	-98.4077	21.3253	-246.812	62.8678	14.9845	-89.6036	-33.1627	34.6503	28.9435	38.4001	-28.5056	-35.0757	-74.8911	30.3638	-53.045	4.76001
41.2448	23.9822	-24.8339	24.9553	73.295	67.4374	-29.7617	110.345	17.9185	-3.35657	-41.9027	133.188	76.0239	-5.29431	-1.1394	72.9541	-42.6525	-190.77	60.5236	121.492	137.419	76.623	-251.575	-77.3687	-37.0867	212.47	-28.2007	-0.0773926	-3.68713	-294.109	-90.1772	48.9808	58.1298	-97.5234	21.8846	-247.138	63.993	15.7528	-89.6932	-33.0768	33.0758	27.3009	38.1876	-28.5077	-35.1353	-74.8506	30.4937	-54.1543	4.21924
39.9691	24.2216	-24.844	25.1368	74.1331	67.9893	-28.7607	110.718	18.5397	-4.20911	-41.0835	134.067	77.0388	-5.19031	-1.85889	73.9642	-44.634	-190.651	60.3995	121.539	138.008	75.4194	-253.39	-79.118	-37.161	211.309	-28.1139	0.322144	-2.61084	-294.995	-91.6035	48.1921	58.2115	-96.4291	22.7336	-247.38	64.8672	16.6553	-89.6058	-33.3051	32.6593	26.7441	38.3311	-28.6008	-35.1379	-74.8513	30.6271	-55.1537	3.70435
38.9169	24.5704	-25.3033	24.7695	74.5896	68.5072	-27.6177	111.203	19.1768	-5.46948	-39.7289	134.793	77.6516	-5.05884	-3.00122	75.4089	-45.5449	-189.802	59.7406	121.53	138.889	75.0748	-254.869	-79.8486	-36.6396	210.916	-28.1187	0.509399	-2.08386	-297.238	-92.9043	47.5684	58.2869	-95.356	23.535	-246.865	65.8939	17.5616	-89.1285	-33.76	32.1324	24.6519	38.4736	-28.9312	-35.4922	-74.8193	30.9984	-55.7855	3.54187
38.3687	24.6228	-25.741	24.4399	75.5887	69.1152	-27.3964	111.955	19.5088	-6.76733	-39.1538	135.049	78.35	-5.05676	-3.7262	76.2277	-45.8643	-188.649	58.8478	121.474	138.255	74.3005	-255.17	-80.8186	-36.8455	210.935	-28.6838	0.802124	-1.57593	-299.512	-93.8916	46.8859	58.1622	-94.2688	24.0297	-246.223	66.7861	17.7637	-88.9539	-34.0332	29.6036	23.1246	37.6759	-29.0424	-36.2844	-74.9313	31.524	-56.184	3.34607
37.3229	24.6708	-25.9076	23.9432	75.7338	70.475	-27.0245	112.199	18.8709	-7.93567	-37.8218	135.337	78.5077	-5.11426	-4.16968	76.2987	-46.5408	-188.59	58.1017	120.435	138.115	73.8523	-256.37	-81.6006	-36.3837	210.784	-28.5687	1.5238	-1.08167	-300.142	-94.9757	46.3378	58.6674	-93.7417	24.9534	-245.401	67.4532	18.264	-89.0891	-35.037	28.184	22.5851	36.7668	-29.1373	-36.3182	-74.9026	32.0312	-58.2609	3.07288
35.7883	24.5538	-26.0858	23.9056	76.0122	71.4843	-26.8624	112.755	18.2747	-9.19617	-36.9388	135.256	79.2715	-5.34265	-5.19995	77.5272	-48.4502	-188.372	57.0529	119.935	138.485	73.172	-258.719	-81.8544	-34.9553	210.785	-29.2814	1.87732	-0.848755	-300.254	-95.7377	45.9606	59.0959	-94.0718	26.1779	-244.859	68.4576	19.0391	-89.1134	-35.9365	27.842	22.0343	35.5582	-28.8348	-36.1703	-74.5483	32.3922	-59.6759	2.25122
35.1965	24.584	-26.2155	23.2955	76.2856	72.0282	-26.5781	113.835	17.2498	-10.203	-35.3573	135.253	80.0751	-5.61133	-6.42102	79.1287	-49.6162	-188.272	55.5171	118.278	139.123	72.3096	-259.922	-81.9338	-33.4399	211.108	-29.9126	2.38708	0.322632	-300.77	-97.098	45.1665	59.6931	-94.2035	26.8816	-245.078	69.2717	19.7115	-89.35	-36.7678	27.4987	21.2701	34.515	-28.9109	-36.4968	-73.9596	32.6427	-60.5227	1.65173
33.8511	24.5345	-26.1506	22.6271	76.2423	72.7306	-26.2561	114.001	16.7802	-11.1788	-34.0162	135.331	80.7577	-5.7594	-7.12927	80.2271	-50.2932	-187.908	55.0079	117.384	139.269	71.3638	-260.156	-83.0464	-32.8794	211.775	-30.8961	2.85083	1.29456	-301.328	-98.8282	44.593	60.0096	-94.0343	28.0209	-245.513	70.4457	21.2361	-89.5441	-37.7498	26.085	19.5144	34.1394	-28.819	-36.5709	-73.5748	32.8433	-61.9771	1.48987
32.8928	24.9053	-26.1355	22.3987	76.3823	73.1533	-26.0171	114.654	16.7834	-12.3145	-33.3811	135.438	81.9954	-5.89062	-7.70874	81.0193	-51.1802	-188.421	54.2405	116.892	138.986	69.3702	-260.496	-84.0638	-32.3927	212.256	-32.4387	3.84961	1.92456	-301.854	-99.9559	43.8169	60.8871	-94.4142	28.6212	-246.076	70.8688	21.976	-89.4915	-39.429	24.6678	18.2373	33.6798	-28.6344	-36.6766	-73.66	33.1224	-62.6066	2.29395
31.1847	25.054	-26.179	21.9001	76.5931	74.0043	-26.0702	115.791	16.5093	-13.1471	-32.406	135.567	82.677	-6.13611	-7.7937	81.2612	-53.0215	-188.813	53.6763	116.653	138.045	66.9323	-262.685	-85.0117	-32.7585	213.568	-32.6656	4.41968	2.47717	-302.047	-100.747	43.0809	61.3245	-94.7194	30.5239	-246.756	71.2272	22.9706	-89.5245	-39.4839	23.4302	18.0568	33.4904	-28.374	-37.3468	-74.1707	33.6467	-61.8923	3.18762
30.7351	25.5969	-26.0969	21.4104	76.583	75.1611	-26.303	116.608	15.7013	-14.1587	-30.7792	135.7	83.012	-6.2561	-8.23596	81.3079	-53.8674	-189.387	52.7689	116.017	137.473	66.4819	-263.65	-85.5132	-32.9966	214.042	-33.9864	4.95837	2.7749	-302.043	-101.495	42.6152	61.8608	-94.9615	31.4777	-248.026	71.6635	25.5951	-89.4651	-39.1085	23.0294	17.429	32.6802	-28.2838	-37.6626	-75.2095	33.9684	-62.0743	3.81604
30.0493	25.6882	-26.0552	20.863	76.8148	75.5026	-26.5101	116.961	15.2397	-14.8215	-29.765	135.939	83.8785	-6.13232	-8.53101	80.903	-54.7756	-189.894	51.8538	115.481	136.692	65.095	-264.463	-85.4153	-32.7251	215.37	-34.5591	5.8512	2.30652	-301.976	-102.997	42.1333	62.246	-94.975	32.254	-249.083	72.1023	26.3097	-89.5239	-39.061	22.4443	17.0883	31.0023	-28.2594	-38.3937	-76.129	34.0007	-63.4037	5.17749
29.3411	25.1262	-26.2053	20.4631	76.998	75.7924	-26.6122	117.03	15.3887	-15.422	-28.9714	136.069	84.1914	-6.15332	-8.7865	79.4517	-55.6924	-190.701	51.2261	115.165	135.698	63.0917	-264.871	-85.0608	-32.2587	217.636	-35.3724	7.37146	1.89014	-301.703	-103.778	41.8387	62.6898	-94.8938	33.1075	-251.142	72.7302	28.3917	-89.5217	-39.1855	21.2085	15.4854	29.8457	-28.1401	-38.9388	-76.8092	34.2538	-63.9087	5.27734
28.9943	24.8927	-26.615	20.0861	76.4938	76.0082	-27.1063	117.586	15.6111	-15.9821	-28.167	136.069	83.4324	-6.16064	-9.00977	78.1681	-56.8158	-190.967	50.6847	114.538	135.031	61.8967	-265.618	-84.8044	-32.0233	218.464	-36.0317	8.27649	1.29871	-301.105	-105.011	41.785	63.5292	-95.0277	34.0557	-252.928	74.1306	28.4902	-89.3448	-39.3947	19.7704	13.8663	29.4489	-28.1633	-39.1003	-76.9031	34.4387	-64.2819	4.4707
28.6956	24.5149	-27.1384	19.8196	76.0868	76.4432	-27.7137	119.052	15.7651	-16.6166	-26.9293	135.835	83.1478	-6.04968	-9.2196	77.0852	-57.9181	-192.227	50.5291	114.305	134.105	61.608	-266.552	-84.1838	-32.1078	219.586	-36.1769	9.48376	1.29626	-300.23	-106.682	41.3354	63.6389	-95.8166	34.6643	-254.354	75.5419	29.3457	-88.8926	-39.3138	19.1877	13.5521	29.0084	-28.2628	-39.0566	-76.7848	34.7778	-64.3651	4.14441
28.3231	24.0363	-27.8553	19.5938	75.6095	76.9952	-28.1123	120.042	16.0258	-17.3591	-26.0787	136.097	83.8046	-5.56201	-9.31836	76.5288	-58.719	-192.999	49.9304	115.094	133.387	59.5206	-267.637	-82.8547	-32.0879	220.995	-36.2231	10.8936	1.5177	-300.134	-106.819	41.0431	63.0084	-96.7329	35.6838	-256.191	76.2726	30.7864	-88.5049	-39.1506	18.7703	13.134	28.6877	-28.2284	-39.0853	-76.8809	35.0836	-64.9341	4.24829
28.2832	23.2557	-28.4717	19.2362	75.1741	77.748	-28.3701	120.613	16.5327	-18.2003	-25.8743	136.325	83.713	-5.36072	-9.3208	75.4933	-59.7373	-193.358	48.7633	115.925	131.616	58.0585	-269.56	-82.2092	-32.33	222.195	-36.1261	12.1959	1.79187	-300.297	-107.862	40.5923	62.5205	-97.3826	36.0828	-257.696	76.4933	31.8282	-87.4121	-38.2952	19.9625	12.5728	28.4022	-28.281	-38.9156	-77.7281	35.4141	-65.286	4.31262
28.2769	22.7863	-28.6776	18.8929	75.1637	78.304	-28.4423	121.213	16.9111	-18.9503	-25.309	136.576	83.9878	-5.61328	-9.18848	74.4248	-60.8088	-193.891	48.5233	116.619	130.15	56.803	-270.786	-79.806	-32.7567	223.287	-36.3344	12.6218	1.79297	-300.202	-109.547	40.1097	62.5081	-97.8518	36.8519	-259.269	76.8816	32.8894	-86.9396	-37.3311	19.6442	12.0096	27.8964	-28.397	-38.5471	-77.8519	35.5863	-65.8778	4.38708
28.5433	21.8973	-29.3834	18.881	75.9229	78.6715	-28.5973	121.878	17.2216	-19.6937	-24.8005	136.805	84.2695	-5.18298	-9.04895	73.124	-62.1875	-196.029	47.6357	116.575	129.541	56.637	-272.901	-79.317	-33.0436	224.386	-36.4929	13.2617	1.89966	-300.372	-111.559	39.2959	62.3962	-98.7141	37.0844	-260.999	77.5597	34.3821	-86.8615	-35.8667	19.0015	12.127	27.6012	-29.4738	-38.1698	-77.6832	35.75	-66.3141	4.39954
28.9956	21.8241	-30.4271	18.7839	76.4639	78.933	-28.9469	122.034	17.2034	-20.811	-23.9213	137.241	84.5535	-4.80212	-8.74878	72.9722	-62.5304	-197.668	45.8207	116.421	129.302	55.308	-273.871	-78.3732	-33.2104	224.659	-36.6947	14.5354	1.90918	-300.083	-111.708	38.4282	62.3828	-99.1176	37.9927	-262.203	78.1068	34.646	-86.7156	-34.6685	19.1434	12.6776	27.1145	-30.3719	-37.9528	-76.7087	35.9601	-66.2377	4.71765
29.0115	21.8219	-31.2719	18.6948	77.0117	79.4015	-29.4307	122.901	17.2031	-22.1538	-22.8895	137.492	84.6907	-3.94543	-8.54932	72.4999	-63.1301	-198.565	44.9163	116.263	128.885	53.3406	-274.808	-77.12	-33.2407	225.148	-36.8671	14.9755	0.971924	-299.884	-112.702	38.2223	62.5969	-99.5845	39.7815	-263.805	79.2037	35.5321	-86.5359	-33.1643	19.6398	14.1387	26.9902	-32.0632	-37.5432	-76.5739	36.1826	-66.1487	5.06836
28.465	21.8383	-31.9027	18.7396	77.5901	79.553	-29.9847	124.162	17.2372	-22.6466	-21.7771	137.955	84.6835	-2.92847	-7.97632	72.0156	-63.6536	-199.12	44.1777	116.217	127.997	53.042	-277.294	-76.8433	-33.0531	225.666	-37.0803	14.9749	0.328369	-299.557	-114.291	37.7671	62.6442	-100.449	40.8711	-265.639	81.0889	36.9529	-86.3285	-31.7086	20.3118	15.0896	26.8229	-33.1168	-36.9399	-74.3706	36.4827	-65.4888	5.67688
28.0984	21.8844	-32.7656	18.6719	77.6478	79.7941	-30.3649	124.905	17.1395	-24.2275	-20.22	138.15	84.6914	-2.41382	-7.2467	72.0203	-64.2758	-200.159	43.1375	116.278	127.123	51.5369	-279.116	-75.9733	-33.353	225.734	-37.4005	15.5352	-0.367432	-299.499	-116.058	37.3768	62.6893	-101.074	41.8705	-266.645	82.5337	37.9777	-86.4221	-31.0238	19.7809	15.9396	26.6327	-34.0029	-36.3855	-73.5573	37.0245	-64.4399	6.15137
27.7743	21.8916	-33.5275	18.7111	78.0828	80.5853	-30.5684	125.207	16.5046	-24.785	-19.5347	138.898	84.6489	-2.17676	-7.02869	72.3975	-65.0746	-201.188	42.5583	116.42	126.75	50.1327	-279.66	-75.8383	-33.8032	225.091	-37.5222	15.9525	-1.65442	-299.609	-116.698	36.4559	62.7993	-101.967	43.3038	-267.174	82.2388	38.9825	-86.2623	-28.7064	19.2335	16.0404	26.4312	-35.3053	-36.5701	-72.6469	36.8761	-63.288	6.38037
27.6178	21.8398	-35.1821	18.6655	78.835	80.9565	-31.4142	125.724	15.7433	-25.2322	-18.8746	139.396	84.5275	-2.01599	-7.13745	72.7117	-65.7312	-202.347	40.8206	117.191	126.352	48.6978	-280.685	-75.8337	-34.2687	224.522	-37.4738	16.1807	-2.79407	-300.058	-117.28	36.9061	62.2091	-102.53	44.4204	-268.542	83.5146	39.6483	-85.9795	-27.4416	19.2422	16.2273	26.2695	-35.9355	-36.4285	-71.9839	36.1533	-62.9873	6.32605
27.5631	21.8448	-35.6814	18.8489	79.4041	81.0894	-32.5034	126.036	14.943	-25.7267	-17.7156	140.146	84.3096	-1.8479	-6.90405	72.6381	-66.8237	-202.927	40.2213	117.575	125.865	47.9951	-281.482	-75.4578	-34.5149	224.183	-37.3252	16.3872	-3.68359	-300.993	-119.038	37.2329	62.1102	-103.52	46.0067	-270.746	84.7563	40.7776	-85.897	-25.9611	18.4957	15.8556	26.0105	-36.4819	-36.2732	-71.2034	35.9309	-63.1488	6.65906
26.3	21.8521	-36.8662	19.2599	80.0514	80.8065	-33.4264	126.505	14.1873	-25.8699	-16.3033	140.699	83.8346	-1.67139	-6.65771	72.0536	-67.9406	-203.836	39.8705	118.625	125.607	46.3918	-282.724	-74.869	-34.9033	223.6	-37.3856	16.3893	-4.3114	-302.657	-119.974	37.3262	61.7877	-104.603	46.6775	-272.047	87.3004	41.1996	-85.8442	-25.3624	17.7261	16.2319	25.7136	-38.0533	-35.9596	-70.4208	35.2457	-63.4873	7.15442
24.9625	21.7974	-38.2076	19.6086	80.1542	80.5774	-34.2555	127.108	13.4188	-25.7799	-15.3333	140.739	82.9513	-1.42297	-6.50281	70.8744	-68.4235	-205.075	39.3855	119.433	125.699	44.6685	-284.51	-74.4485	-35.2239	222.867	-37.2581	16.1655	-4.3042	-303.829	-120.413	37.4069	61.4443	-105.377	46.9102	-274.164	88.1532	42.9584	-86.0736	-23.8832	16.6635	16.6052	25.4672	-38.9946	-35.4249	-69.076	35.1824	-62.7704	7.40674
23.6644	21.7601	-39.3353	20.5977	80.224	80.4508	-34.8164	127.712	12.0865	-25.9241	-14.9662	141.302	82.5552	-1.32056	-6.44324	70.2694	-69.546	-205.813	38.7035	120.642	125.708	44.1741	-285.124	-73.8309	-35.4958	221.745	-36.8688	16.2562	-4.07141	-305.697	-120.976	37.6777	61.2368	-105.735	47.6071	-275.696	88.552	43.9846	-86.5775	-22.6727	16.1538	16.291	25.3027	-39.5504	-35.059	-67.1315	35.1981	-63.0372	7.67627
23.4197	21.6721	-40.5953	21.3607	80.2809	80.2252	-35.4958	128.518	10.7054	-26.2711	-13.8938	142.355	81.9614	-1.36292	-6.18457	69.4696	-70.9424	-206.538	37.4922	121.493	125.672	43.1212	-285.9	-73.5399	-35.4647	220.671	-36.6868	16.704	-4.07166	-306.951	-122.601	37.9189	60.9098	-107.404	47.7244	-277.024	88.3333	45.2189	-86.8937	-21.1367	16.054	16.3406	24.4288	-40.1647	-34.428	-66.0941	35.2977	-63.2186	7.89319
22.8689	21.6147	-41.5913	21.989	80.4672	79.5518	-35.8474	129.752	9.34424	-26.8508	-12.7784	142.902	81.5396	-1.16455	-5.74487	68.3301	-71.9156	-208.009	36.625	122.539	126.137	41.5048	-286.521	-73.9651	-35.3215	220.575	-36.264	16.9424	-3.95068	-308.862	-124.065	38.7039	60.6542	-108.495	47.5294	-278.168	87.5701	45.3335	-87.1583	-21.0496	15.8976	16.5935	23.7239	-40.3536	-33.8662	-65.4993	35.228	-63.4269	8.39551
21.577	21.575	-42.8424	22.1473	80.0879	78.4086	-36.2653	130.449	8.23853	-27.2596	-10.9233	143.509	80.9392	-0.9375	-5.01611	67.9932	-73.0811	-209.205	35.8632	123.509	126.519	39.6982	-287.912	-74.3364	-35.3035	220.3	-35.8546	17.5981	-4.07178	-311.118	-124.815	39.2367	60.7385	-109.432	46.9753	-279.166	85.295	45.929	-87.5773	-19.6667	15.7147	16.6174	23.1582	-40.3077	-32.9689	-64.5621	35.1837	-63.1963	8.8418
19.9829	21.5162	-44.2515	21.7445	80.0161	77.9683	-37.0238	130.485	7.07056	-27.6289	-10.1899	144.118	80.3315	-0.363403	-5.08557	67.4801	-74.9746	-211.173	34.8939	123.79	127.141	39.1381	-289.225	-74.6455	-35.4297	220.175	-35.3684	18.494	-4.03064	-312.478	-125.369	39.6266	60.7025	-109.693	46.2826	-280.091	84.0049	46.7914	-87.8263	-17.4796	15.4175	16.7124	22.9669	-40.5337	-32.6061	-63.0822	35.2087	-63.2646	9.26294
19.521	21.4476	-44.7695	21.5066	80.0089	77.5885	-37.5356	130.541	6.32642	-27.9309	-9.03845	144.285	79.4725	-0.235474	-4.93005	67.3816	-76.1327	-211.648	34.0626	125.322	128.06	38.8268	-290.386	-75.1241	-35.39	220.025	-34.868	18.8479	-3.97229	-312.823	-126.076	39.9935	61.1044	-109.715	45.064	-281.358	83.4078	47.5803	-88.7931	-15.0913	15.1744	17.0876	22.0762	-40.7423	-32.3152	-62.3254	35.1495	-63.5143	9.83301
19.0388	21.4392	-45.2607	21.2749	79.7899	77.1112	-38.5415	130.784	5.19629	-27.964	-8.11353	144.514	79.0179	0.0390625	-4.32568	67.6439	-76.2717	-212.93	33.481	126.465	128.278	37.8068	-291.809	-75.4487	-35.1318	219.729	-34.7384	18.7385	-4.10229	-313.622	-127.173	40.5935	61.1259	-110.766	44.2268	-282.454	82.9869	48.9384	-89.033	-14.6476	14.2585	17.759	21.335	-41.0697	-31.5148	-61.0566	35.1842	-63.8062	10.5046
18.3518	21.5354	-45.8314	21.1576	79.4229	76.4911	-39.1464	131.27	4.18042	-28.3557	-7.05188	144.781	78.0682	0.308838	-2.89392	68.1653	-77.5811	-214.28	33.2639	127.545	128.736	35.8644	-294.018	-75.8777	-34.9945	219.655	-34.4849	18.4412	-4.18945	-315.454	-127.923	41.4136	61.3442	-110.987	42.6285	-282.988	82.2291	50.4847	-89.4496	-13.4811	13.3469	18.5247	20.319	-41.5216	-30.7997	-59.2607	35.1478	-64.5447	11.4407
18.0632	21.7004	-47.3342	21.1104	79.2625	76.2306	-38.7826	132.151	2.7179	-29.0543	-6.28296	144.635	77.3859	0.78479	-1.9729	68.7452	-78.9198	-215.625	32.353	129.096	129.816	35.1169	-294.945	-75.906	-35.1478	219.435	-34.3304	18.0204	-4.05615	-315.604	-128.585	41.9188	61.7327	-110.937	42.3346	-283.498	81.76	51.8075	-90.4363	-11.532	13.2325	19.5145	18.7894	-42.0613	-31.406	-58.5625	35.2491	-65.4572	12.1932
16.9581	22.0551	-48.847	21.0607	78.7882	76.1288	-38.4615	131.742	1.64392	-29.1079	-6.00549	144.368	76.4808	1.20349	-1.30725	69.0361	-80.1372	-216.65	31.2494	129.372	130.316	34.8168	-295.237	-75.9999	-35.4218	219.258	-34.3258	17.4709	-4.31665	-316.007	-129.491	42.434	61.9298	-110.471	42.1476	-284.699	81.1567	53.3821	-91.072	-9.45959	12.8811	20.583	17.0352	-42.3539	-31.9722	-57.2292	35.2607	-66.2986	13.1796
16.5227	22.3533	-49.6349	20.9907	77.4917	75.9154	-38.6279	130.151	0.546509	-29.5619	-5.62512	143.779	75.6484	1.25354	-0.625366	69.5656	-81.0078	-218.004	30.4403	130.572	131.066	34.1876	-296.483	-76.1936	-35.6698	219.202	-34.3292	16.9193	-4.63904	-316.527	-130.655	43.1809	61.9429	-108.947	41.7493	-285.353	80.2778	53.9587	-91.4209	-9.04773	12.5244	21.8511	16.5852	-42.9446	-32.2809	-56.3431	35.2454	-68.5168	13.8958
16.8938	22.5825	-49.6283	20.95	76.5513	75.7766	-38.2902	128.858	-0.435303	-30.1454	-5.27954	143.136	75.2256	1.11841	-0.334351	70.3217	-82.1165	-219.172	29.9282	131.685	131.623	32.9171	-298.332	-76.4362	-36.1865	219.299	-34.4434	15.8026	-5.49207	-316.987	-130.911	43.6187	61.8016	-108.151	40.9753	-286.126	80.6707	54.8184	-91.9489	-8.26733	11.6813	22.7782	16.1074	-43.209	-32.4397	-55.7316	35.2057	-69.5507	14.2051
18.9443	22.754	-50.1543	20.9668	75.8223	75.5299	-37.9071	128.281	-2.11023	-30.6854	-5.05151	142.834	74.8666	1.2627	-0.0419922	70.7034	-83.408	-219.985	29.6864	133.382	131.983	32.4225	-299.116	-76.8439	-36.8004	219.233	-34.6139	15.3009	-6.4115	-317.888	-131.86	44.3477	61.5547	-107.577	40.7631	-286.597	81.4004	56.9364	-92.3125	-7.23938	11.0815	23.8073	14.9301	-43.358	-32.6813	-54.8886	35.1685	-71.2628	15.269
20.3945	23.0256	-51.582	21.1089	75.1638	75.324	-37.2163	127.692	-3.68994	-31.1464	-5.1543	142.07	74.3883	1.39502	0.274536	70.5548	-85.5725	-220.198	29.4959	134.647	132.855	31.8143	-299.721	-77.0942	-36.8422	219.211	-34.6282	15.0787	-7.72205	-318.917	-132.425	45.0552	61.459	-107.201	40.4006	-287.051	81.1425	57.8096	-92.2665	-5.76648	10.9744	25.0779	13.5443	-43.1857	-34.4783	-54.6555	35.1433	-74.0424	15.9611
21.3003	24.712	-53.6328	21.7407	74.6777	74.902	-37.0094	126.97	-4.60583	-31.3936	-5.401	141.562	73.8721	1.60107	1.50708	70.5421	-85.9227	-222.441	29.1964	134.937	133.655	31.3153	-300.619	-77.3621	-36.8636	219.277	-34.3107	16.1377	-8.37634	-319.646	-134.868	45.4685	61.47	-106.56	40.5444	-287.723	80.5214	58.9722	-92.5613	-4.04541	10.8433	25.6731	12.9493	-43.1608	-36.7714	-54.6671	34.9956	-74.7869	15.9924
22.4192	25.8282	-54.0079	22.1597	73.484	74.5088	-36.8165	126.547	-5.12378	-31.6943	-5.60583	140.974	73.5802	1.71826	1.86462	70.568	-86.7914	-223.833	29.2856	136.09	133.981	30.9401	-303.299	-77.4453	-37.0804	219.314	-34.0118	16.7521	-8.6626	-320.578	-135.648	45.7698	61.538	-106.084	40.7937	-289.079	79.5466	59.3317	-92.9427	-2.91113	10.6487	26.6812	11.7076	-43.1462	-37.413	-54.6825	34.8336	-75.5511	14.7119
22.3625	26.3464	-54.7743	22.3165	72.7711	74.3832	-36.3087	126.152	-7.01611	-31.8497	-5.47766	139.782	72.9303	1.72852	2.11316	70.382	-88.3892	-224.286	29.248	136.691	134.385	30.762	-304.55	-77.1215	-37.5878	219.574	-33.7377	18.0043	-8.55371	-321.865	-136.107	46.38	62.1576	-105.258	41.0016	-290.346	79.363	59.5616	-93.2864	-1.9917	10.4834	27.5856	10.9371	-43.1975	-37.9884	-54.6313	34.7416	-76.5077	13.9249
22.2913	26.7299	-55.7736	23.1526	72.2263	74.3165	-35.7664	125.612	-9.21021	-31.9846	-5.64539	139.023	72.5125	1.89807	2.19312	70.1685	-90.6322	-225.872	30.2059	138.623	134.35	30.8042	-304.768	-75.6672	-37.8059	219.775	-33.2904	18.4429	-7.99927	-322.804	-137.603	46.1444	62.218	-104.858	41.1072	-292.235	77.7002	60.5471	-93.28	-1.3407	10.2377	29.4139	9.89514	-43.0828	-39.6824	-54.5105	34.7219	-77.8134	11.8612
22.4602	27.2859	-56.1823	23.5129	71.7743	74.2561	-35.4196	124.808	-10.1216	-32.2338	-5.57251	138.741	72.0233	1.85083	2.37769	70.1144	-91.0571	-227.561	30.5724	139.086	134.071	30.8781	-305.773	-74.499	-37.8989	220.29	-32.7869	19.2783	-6.4917	-324.855	-139.379	45.8007	63.267	-104.653	41.1155	-293.469	75.6157	62.4767	-92.8346	-0.553833	10.2227	30.2198	7.76746	-42.9774	-41.7638	-54.2278	34.6339	-80.2688	10.4419
22.4783	27.7786	-57.7865	23.4291	71.6023	74.1532	-35.3618	124.264	-10.8936	-32.5253	-5.13928	138.266	71.7445	1.73242	2.4729	70.0298	-92.0186	-228.281	31.437	139.731	133.705	30.8798	-307.594	-73.6918	-37.8733	220.519	-32.6163	20.0487	-5.98083	-326.261	-140.363	45.4054	64.0264	-104.906	41.1246	-294.076	74.6864	63.0574	-92.4202	1.41858	10.2113	30.1591	6.49084	-42.8402	-42.5143	-54.0339	34.4905	-80.1932	9.45032
22.4768	28.3042	-58.2766	23.49	71.1504	73.8584	-35.2915	123.725	-11.9305	-33.5033	-4.83923	137.341	71.5034	1.7002	2.59692	70.0491	-93.5532	-229.373	32.2644	141.102	133.255	30.6926	-308.989	-73.5791	-38.0037	220.94	-32.4021	20.4392	-4.28235	-326.675	-140.629	44.6045	64.125	-105.019	41.1777	-294.952	72.4263	63.6138	-91.7723	3.00842	10.3499	30.0331	6.29248	-43.5703	-43.361	-53.8352	34.3856	-81.6741	9.5752
22.4968	29.1602	-58.7126	23.54	70.6058	73.7947	-35.5891	123.65	-14.1816	-34.3127	-4.60413	136.836	71.4623	1.63611	2.74548	70.1693	-94.8162	-231.751	32.9379	142.021	132.553	30.542	-310.206	-73.088	-38.2499	221.377	-32.0469	20.808	-3.0177	-327.842	-141.468	44.0526	64.118	-104.789	40.9763	-296.038	70.3264	63.8824	-91.2045	3.67358	10.4396	30.4252	5.53796	-44.088	-43.8214	-53.6373	34.275	-83.2459	9.3031
22.5123	29.7596	-60.0115	23.5846	70.1603	73.1539	-35.8699	123.975	-15.4008	-34.9587	-4.33374	136.394	71.6842	1.6853	2.85938	70.3768	-95.0867	-232.779	33.9545	143.132	132.039	30.3844	-311.595	-72.7915	-38.5776	222.235	-31.7974	21.8219	-2.84424	-329.892	-143.049	42.0972	64.3398	-103.903	40.5427	-297.029	69.5831	65.8671	-90.6213	3.49146	10.6798	31.4125	4.25745	-44.9991	-44.2656	-52.8654	34.2517	-85.0996	9.2262
22.4963	30.0459	-60.6432	23.2198	69.7454	73.1393	-35.8442	123.955	-16.9348	-35.839	-3.93933	135.528	72.3734	1.87695	3.48462	70.5806	-95.4865	-233.505	35.2598	143.558	132.036	29.9077	-313.935	-72.6399	-38.996	222.74	-31.3732	22.0149	-2.82324	-331.957	-144.767	40.759	65.7389	-102.998	39.6904	-298.445	69.092	67.9413	-89.9045	2.26965	10.8849	31.6139	3.87	-45.2715	-44.2026	-51.9984	34.5897	-86.3851	9.18335
22.499	30.6198	-61.5309	22.9611	69.1613	73.2959	-36.3221	124.154	-17.875	-36.4508	-3.47852	134.782	72.6162	2.00452	3.50024	70.5377	-96.6177	-234.256	36.1394	144.473	131.979	28.7152	-314.61	-72.5016	-39.8234	223.438	-31.0719	22.535	-3.01758	-333.35	-145.195	40.5298	67.0497	-101.933	39.2242	-298.708	67.41	68.3214	-89.3739	1.90308	11.0463	31.7249	3.24011	-45.4584	-44.2786	-50.6497	34.8389	-86.675	9.17529
22.4514	31.0754	-62.6111	22.7378	68.0485	73.3809	-37.1761	124.161	-18.8162	-36.5746	-3.30774	134.551	73.282	2.23132	3.94275	70.332	-97.9329	-235.072	36.5352	145.391	131.742	26.7018	-314.815	-72.267	-40.5648	223.947	-31.0615	23.1075	-3.047	-334.547	-146.02	39.41	67.2794	-101.348	38.8707	-299.677	66.5592	68.9423	-88.5809	2.43835	11.3317	32.1285	2.14221	-45.9073	-44.3052	-50.7849	34.9418	-88.0753	9.22876
22.5033	31.5393	-63.5178	22.7152	67.7177	73.3585	-37.476	124.117	-20.1462	-36.4058	-2.89197	134.346	74.5092	2.27136	4.88269	69.9698	-99.3782	-235.77	36.391	145.98	131.452	25.0198	-316.666	-71.9152	-41.5524	224.196	-30.9027	23.9891	-2.96643	-335.551	-146.588	38.3629	67.1473	-100.524	38.0771	-300.773	65.7617	69.4846	-87.7058	2.65027	11.5798	32.7814	1.62366	-46.4359	-44.4459	-49.8102	34.7919	-88.8857	8.70642
22.5023	32.0696	-63.8821	22.604	67.0996	73.2722	-38.595	124.172	-21.1824	-35.9801	-2.30872	133.885	75.3203	2.15564	5.7124	69.483	-101.216	-236.378	36.0065	146.595	131.318	23.6511	-319.269	-71.7716	-42.329	224.935	-30.6882	24.6449	-3.08228	-338.019	-148.173	37.1177	67.0253	-99.6746	37.2054	-301.492	63.5138	70.5649	-87.3309	3.17725	11.9133	34.0052	0.711426	-47.2694	-45.5844	-47.4932	34.6913	-90.6219	8.33594
22.4138	32.8855	-64.9352	22.9146	66.3091	73.0935	-39.3356	124.27	-22.5939	-34.8086	-1.85413	133.685	75.6118	2.12671	6.42285	68.7516	-102.783	-237.438	36.2631	146.965	131.242	21.4023	-319.914	-71.3976	-43.224	225.614	-30.6615	25.3848	-3.19739	-339.182	-149.937	35.4513	66.8519	-98.9696	36.3743	-302.633	62.443	71.5619	-86.8008	3.39954	12.337	35.1211	0.487061	-47.5363	-46.291	-46.134	34.5406	-91.9154	7.53857
22.458	33.6908	-65.905	23.0435	64.9307	72.5321	-39.2628	124.267	-22.7808	-33.7021	-1.48767	133.381	75.5248	1.9552	7.07031	68.0652	-102.981	-238.703	36.3636	147.398	131.128	20.0026	-320.601	-70.9513	-44.3248	225.28	-30.8604	26.4694	-3.26599	-340.047	-150.349	35.0591	66.4453	-98.1449	35.726	-303.085	62.1664	72.7672	-86.548	4.11804	12.3387	35.6166	0.437012	-47.5677	-47.0863	-45.5879	34.6702	-92.1565	6.34009
22.4359	34.5469	-66.4408	23.7551	64.4614	72.1204	-41.0026	124.214	-23.5959	-32.4764	-0.583984	133.121	75.213	1.67261	7.9436	67.5463	-103.955	-239.31	36.4109	147.906	131.038	18.5488	-320.997	-71.0605	-44.765	225.043	-31.3135	27.0315	-3.31616	-341.421	-151.427	33.7858	66.2716	-97.6	34.8475	-303.184	61.5002	73.3274	-86.3127	3.77588	12.5984	35.5309	0.10791	-47.844	-48.2367	-45.5057	34.8907	-92.8584	5.9115
22.5189	34.9958	-66.4034	24.1697	63.8103	71.8129	-41.4978	123.679	-24.6105	-31.7548	-0.0106201	132.831	75.4874	1.35242	8.43762	66.6268	-106.217	-240.115	36.121	148.421	131.024	17.386	-319.745	-71.1514	-45.8523	224.371	-31.9362	27.4216	-3.26843	-342.798	-152.846	32.2719	65.6287	-96.5872	33.2649	-303.828	61.3318	74.0245	-86.0166	3.22766	13.3676	35.7019	-0.381226	-48.1793	-51.1694	-45.3297	34.3574	-93.6251	3.89172
22.1761	35.6068	-66.1858	24.5995	63.1471	71.114	-41.8652	123.164	-25.3666	-30.9681	0.343872	132.603	75.4276	1.1394	8.7262	65.8168	-107.07	-240.375	35.9871	149.068	131.014	16.3192	-318.053	-71.3635	-47.865	224.255	-31.7675	28.1592	-3.17065	-343.92	-154.473	31.3988	65.9022	-96.2672	31.5674	-304.834	61.3003	75.2451	-86.2467	3.12634	14.3005	36.0298	-0.694092	-48.5859	-51.7944	-45.1595	34.2086	-95.4011	2.91931
22.5649	35.8997	-65.7177	24.9301	62.2318	70.8273	-42.0077	122.538	-25.2051	-30.1334	1.03442	132.271	75.3785	1.14795	9.09253	64.9504	-107.861	-240.192	35.8353	149.876	130.668	14.7513	-317.137	-72.0043	-48.9048	224.278	-32.4115	28.4644	-2.87585	-345.14	-155.164	30.6929	65.2767	-95.4594	30.5635	-306.187	60.7423	75.6681	-85.9926	2.61316	14.4756	36.2233	-0.646851	-48.9662	-52.5157	-44.6609	34.3086	-96.8158	1.99219
22.3496	36.1243	-65.7805	25.2371	60.8036	70.2058	-42.332	122.14	-25.1176	-29.4915	1.46155	132.164	75.5854	0.326904	9.4364	64.4465	-109.502	-239.786	35.7919	150.465	130.509	13.8054	-315.203	-73.109	-49.8287	223.644	-33.4609	28.5282	-2.91711	-346.584	-155.232	30.0653	64.0338	-94.7251	29.9122	-306.76	59.9633	76.3	-86.1945	0.926025	15.1209	36.1273	-0.751343	-49.8644	-53.4696	-43.7247	34.4364	-97.3931	1.66821
22.4397	36.6309	-65.791	25.5106	60.0227	69.4934	-42.6586	121.908	-24.9611	-28.9218	2.48132	131.887	75.74	-0.0623779	9.75586	63.2561	-110.357	-240.542	35.519	151.085	130.088	11.4551	-314.127	-74.0319	-50.7734	223.281	-33.7852	28.7224	-2.75403	-348.355	-156.187	28.9575	63.9761	-93.9088	28.1221	-307.309	59.0703	76.6425	-86.323	-0.254883	15.803	36.6987	-0.946411	-50.5914	-54.8383	-42.5924	35.1145	-98.1396	1.14307
22.4469	36.8274	-65.8258	25.5299	60.0842	68.9619	-42.8523	122.016	-24.6995	-28.6044	3.34375	131.603	75.9674	-0.412964	9.39258	62.4664	-111.672	-241.189	35.5326	151.789	129.475	10.6719	-312.526	-74.754	-51.4075	222.659	-34.9114	28.7781	-2.78552	-349.681	-156.831	27.646	64.4734	-93.0776	26.6677	-307.664	57.9871	76.776	-86.3375	-1.38733	17.6794	37.2451	-0.995972	-51.176	-56.7256	-41.4624	35.2782	-99.7701	-0.0200195
22.6343	37.01	-65.9778	25.4634	58.5399	68.1827	-42.9299	122.121	-24.6025	-28.4	3.56812	130.899	76.2612	-0.488403	8.39795	60.6227	-112.379	-241.373	35.5602	152.746	128.852	9.1344	-311.917	-75.4996	-52.3901	222.328	-35.8914	28.7058	-2.6366	-350.739	-158.356	26.2726	64.9869	-92.488	25.908	-307.895	57.4762	77.3226	-86.3344	-2.80798	19.7906	38.2683	-0.887573	-51.5735	-58.1581	-41.2699	35.2169	-100.63	-0.123901
22.698	36.6641	-66.2531	25.1965	57.1376	67.6083	-42.8999	121.922	-24.5918	-28.3698	3.7489	130.483	76.4502	-0.614868	6.71704	58.2509	-113.402	-241.78	35.5397	152.936	128.493	8.15662	-310.4	-75.6506	-52.8463	221.981	-36.2882	28.7277	-2.40161	-352.066	-159.046	25.8855	66.1228	-91.9998	24.5101	-307.663	57.0377	78.019	-86.1549	-4.11609	20.6831	39.2476	-0.520508	-51.7506	-58.8843	-40.7874	34.9845	-100.945	-1.66797
22.5579	36.3264	-66.6486	24.9156	56.8696	66.8458	-42.851	121.55	-24.4192	-28.488	4.23938	129.915	76.6157	-1.00928	5.96753	57.1792	-114.751	-243.269	35.1852	153.153	128.021	6.64417	-309.925	-76.3014	-54.0208	222.298	-37.3857	28.5802	-2.13916	-353.986	-159.737	25.7677	68.2371	-92.3059	22.61	-307.162	56.1923	78.4366	-86.1357	-4.95703	20.2383	39.9709	-0.538818	-51.5795	-59.0769	-40.11	34.8845	-101.153	-2.7583
22.5988	36.1998	-66.7307	24.7784	57.535	66.476	-42.9971	121.378	-24.4171	-29.145	4.55225	129.615	76.9116	-1.30322	5.08313	56.1865	-115.711	-244.671	35.0957	153.077	127.768	4.21069	-309.303	-77.3376	-55.7092	222.67	-38.2626	28.6591	-1.95398	-355.251	-160.378	24.7572	68.5009	-92.4226	21.6145	-305.98	55.8973	79.5881	-86.0717	-5.66907	20.8672	40.2765	-0.144653	-51.1731	-59.5907	-38.4167	34.568	-101.269	-2.8125
22.8705	36.3035	-67.1503	24.8226	59.2811	66.3002	-43.2845	121.182	-24.9669	-29.8073	4.76477	129.488	77.2987	-1.32373	3.94177	55.0815	-116.866	-245.266	34.9896	153.3	127.506	2.61877	-308.449	-77.9978	-55.6205	223.131	-38.8376	28.6962	-1.79993	-356.225	-160.875	24.6333	68.6437	-93.3097	21.0538	-305.297	55.006	80.2969	-86.0409	-6.95251	22.2859	40.502	0.117065	-50.9418	-60.1433	-36.647	34.5731	-101.688	-0.606079
22.8933	36.4453	-67.3771	24.7819	60.9196	66.1095	-43.511	121.085	-25.4347	-30.2584	4.91174	129.244	77.5398	-1.35974	3.51282	54.0437	-117.584	-246.048	34.4332	153.536	126.763	2.29797	-307.316	-79.0468	-56.0175	223.804	-39.0604	28.7212	-1.56995	-356.961	-161.792	24.3761	68.7538	-94.3057	20.3811	-304.908	54.2	80.718	-86.057	-8.56799	24.8998	40.4576	0.836304	-50.8159	-60.9265	-36.7766	34.2968	-102.067	1.18018
22.8137	36.6796	-67.7368	24.7357	61.2623	65.7657	-43.656	120.519	-26.0879	-30.3439	5.00354	129.02	77.6536	-1.26172	3.45557	53.1176	-118.695	-246.491	33.8069	153.563	126.258	1.27612	-306.805	-79.553	-55.7371	223.798	-39.1262	28.797	-1.29077	-358.554	-163.628	24.1543	68.7908	-95.7914	18.1844	-304.354	53.2572	81.9374	-86.2218	-9.5769	25.4512	39.7736	1.08447	-50.8022	-61.7598	-36.4226	34.4633	-102.718	2.13367
22.7443	36.6556	-67.8893	24.801	61.4536	65.5719	-43.7576	119.536	-26.9609	-30.3688	5.09729	128.932	77.9641	-1.24646	3.55591	52.265	-120.126	-248.502	33.5114	153.571	125.984	-0.679199	-306.541	-79.9667	-53.7408	225.065	-39.1542	28.7719	-1.56116	-359.932	-164.092	23.7235	69.3406	-97.1494	17.3776	-303.706	52.5297	82.7288	-86.171	-11.0132	25.2903	38.7285	1.36646	-51.0569	-62.0896	-35.4602	35.3245	-102.935	2.88123
22.691	36.504	-67.5875	24.9485	61.9124	65.1757	-43.8419	118.905	-27.7949	-30.3788	5.26038	128.895	78.0861	-1.151	3.58508	51.8741	-121.758	-249.578	33.5276	153.628	125.864	-2.08838	-306.416	-80.4917	-51.5686	225.082	-38.9789	28.996	-1.78674	-361.322	-165.13	23.328	70.1779	-99.2422	15.9666	-303.294	51.3119	84.0345	-85.8495	-12.6499	25.6885	37.6735	1.63318	-51.0884	-63.8732	-34.5701	35.6403	-103.702	3.29309
22.713	36.4373	-66.6475	25.0205	62.6946	64.9766	-43.3241	118.147	-28.5696	-30.3334	5.71484	129.026	78.2422	-0.785889	3.71204	51.6403	-122.513	-250.783	33.5782	153.606	125.884	-2.69373	-305.997	-80.6364	-50.6113	224.909	-38.6284	29.3179	-2.16919	-362.562	-166.162	20.2162	70.4404	-100.659	14.6251	-303.746	50.7472	84.5339	-85.7317	-13.2515	26.7556	35.4681	1.67151	-50.9521	-64.6615	-33.9283	35.6514	-104.135	3.53052
22.7677	36.6461	-65.2019	25.1324	63.2841	64.8237	-42.6841	117.956	-29.1567	-30.364	6.42493	129.47	78.359	-0.648682	3.92163	51.8424	-123.636	-252.122	33.8392	153.341	125.894	-4.18945	-304.724	-81.2081	-49.4712	224.576	-38.3352	29.4938	-2.16455	-363.905	-168.109	19.0465	70.3317	-101.411	13.8149	-304.68	49.7815	85.5245	-85.8051	-13.6455	29.5692	35.0875	1.73877	-51.1797	-64.8875	-32.8297	35.5613	-104.675	3.58838
23.0673	37.0469	-62.616	25.6378	64.1372	64.6659	-42.2217	117.878	-30.1156	-30.5228	6.6676	129.908	78.2153	-0.00549316	3.86438	52.0032	-125.72	-252.949	33.7532	153.301	125.848	-6.52295	-304.362	-82.4602	-49.0345	224.278	-37.8995	29.8875	-2.47986	-365.736	-169.047	18.1342	70.1782	-102.211	12.6525	-305.327	48.5538	86.7837	-85.8094	-14.3193	30.332	34.8025	1.54602	-51.1495	-65.2826	-31.6888	35.473	-105.056	3.70032
23.4679	37.453	-61.6224	25.9059	64.6892	64.2716	-41.6248	117.939	-31.0264	-30.814	6.82043	130.15	78.2294	0.649536	3.68115	52.054	-126.957	-253.93	33.8143	152.609	125.87	-7.98608	-304.212	-83.6282	-48.394	224.057	-37.6094	30.0967	-3.14136	-366.651	-169.191	17.5344	70.4147	-102.661	12.1652	-305.386	47.9105	87.3638	-85.7745	-14.9269	31.3779	34.3212	0.723633	-50.881	-65.9474	-31.3252	35.5874	-104.981	3.8446
23.7435	37.3839	-60.4236	26.0588	64.4976	63.9191	-40.7428	117.92	-31.7836	-30.8022	7.02368	131.09	78.213	0.165527	3.15466	51.9855	-127.143	-255.163	34.0668	151.958	125.935	-8.82935	-304.055	-84.8506	-48.766	223.317	-37.2427	30.0419	-3.64758	-367.705	-169.92	16.9238	70.55	-103.221	11.2812	-305.358	46.9568	88.322	-85.7554	-15.3297	32.606	33.9562	0.779541	-50.7654	-66.5061	-31.1188	35.5327	-105.224	3.99939
23.979	37.7317	-59.5649	26.5164	64.4922	63.6693	-40.3253	117.984	-32.6162	-30.7501	7.56763	131.199	78.2538	-0.0267334	2.81543	52.0045	-128.367	-256.825	34.3875	151.625	125.999	-10.1434	-303.655	-85.5488	-48.9777	222.476	-36.6394	29.6255	-4.03479	-368.394	-170.44	16.2156	70.6532	-104.189	10.4703	-305.18	44.4683	88.55	-85.7609	-15.6265	32.8613	33.8739	0.0844727	-50.6885	-66.7683	-30.486	35.5784	-105.61	4.24695
24.621	38.1053	-58.7446	26.639	64.485	63.5419	-40.5492	117.971	-33.1033	-30.8517	7.68835	131.572	78.2759	0.441772	2.47559	51.9851	-130.263	-258.023	35.0188	150.642	126.04	-11.7245	-303.808	-85.8665	-49.317	221.928	-35.1033	29.278	-4.21741	-369.492	-170.666	15.4537	70.7986	-104.792	10.1442	-305.12	43.1255	88.8168	-85.8208	-16.0791	33.7291	34.0883	-1.07312	-50.9414	-67.4048	-29.1185	35.7329	-105.815	4.60376
25.1602	38.3375	-57.9708	26.5751	64.4817	63.8794	-40.5217	118.224	-34.2986	-31.076	7.97913	132.248	78.4779	0.888306	2.35779	52.0358	-131.087	-259.023	35.467	150.301	126.173	-12.0917	-304.126	-86.2754	-49.1323	220.93	-34.5934	27.9337	-4.76379	-371.844	-171.08	14.8441	71.1697	-105.211	9.62061	-305.434	42.7263	89.442	-85.8351	-15.7933	35.8446	34.2256	-1.64417	-50.6221	-68.3043	-28.2284	35.9568	-106.055	5.23743
25.7933	38.483	-57.9288	26.3918	64.4948	64.4764	-40.4852	118.495	-34.5668	-31.1781	8.02307	132.645	78.9386	1.22278	2.328	51.9492	-132.291	-259.925	35.9	150.148	126.076	-13.5022	-304.496	-87.0222	-49.0448	220.367	-34.002	27.6291	-5.84851	-372.208	-171.548	14.6136	71.3586	-105.324	7.51208	-305.974	42.16	89.53	-85.9449	-15.3583	36.4412	34.2549	-1.07471	-50.4658	-68.8488	-27.7977	35.8423	-106.376	5.44275
26.6349	38.7925	-58.4059	26.4362	64.5118	65.1834	-40.4658	118.723	-35.1687	-31.5587	8.13306	132.542	79.5895	0.953003	2.14148	52.0017	-133.951	-260.988	36.0735	150.512	125.883	-15.0868	-304.992	-87.7225	-49.2993	219.808	-33.4374	27.2305	-6.2323	-373.148	-171.824	14.5327	71.2328	-105.183	5.39697	-307.014	40.9397	89.3345	-86.1166	-14.6023	37.2056	34.6608	-0.975586	-49.6289	-69.791	-27.3403	35.8365	-106.557	5.85815
28.2795	38.759	-58.6075	26.3896	64.1805	65.4646	-40.0354	118.398	-35.3674	-31.8156	8.2981	132.514	80.1304	0.822754	1.95935	51.6627	-135.873	-262.958	36.0254	151.17	125.771	-16.2518	-305.391	-87.9937	-49.3641	219.251	-32.9064	26.7957	-6.58167	-374.355	-171.968	14.8314	71.6019	-104.99	4.84497	-308.579	40.3429	89.7109	-86.2421	-14.7257	38.8812	34.8059	-1.03442	-49.1506	-70.7964	-26.907	35.8971	-106.543	6.59937
29.1587	38.9156	-58.5764	26.4269	63.4298	65.9592	-39.6899	118.177	-35.7192	-32.0542	8.62598	132.301	81.1886	0.269165	1.9115	51.4005	-136.951	-263.711	37.0602	151.871	125.705	-17.5806	-306.179	-88.2432	-49.3596	217.919	-32.4011	25.9496	-7.31091	-375.281	-172.024	15.2667	72.34	-104.325	4.34998	-309.549	39.4163	89.8002	-86.3972	-14.8846	39.665	35.1917	-1.17188	-48.3041	-71.797	-26.5315	35.9326	-106.899	6.85034
30.8363	39.1111	-58.735	26.4602	62.793	66.0814	-39.5496	118.325	-35.9968	-32.3425	9.10657	132.143	82.1722	-0.741577	1.65588	51.0878	-137.589	-264.157	38.5654	152.086	125.709	-19.6206	-306.699	-89.2014	-49.2371	216.529	-31.8773	25.2534	-7.78503	-376.977	-171.678	15.5701	73.3085	-104.398	2.95776	-310.528	38.8621	89.9053	-87.0509	-14.9496	40.3439	35.3499	-1.46411	-48.0154	-72.476	-25.2428	36.8004	-107.013	7.18518
33.1874	39.2059	-58.7903	26.6227	62.4821	66.6318	-39.5853	118.927	-36.4714	-32.8265	9.4032	132.015	83.1023	-0.906006	1.34363	50.5856	-138.719	-264.704	39.2368	152.295	125.853	-20.364	-307.447	-89.4232	-49.2013	216.144	-31.1619	24.1215	-7.55432	-378.665	-171.361	16.0032	73.9531	-104.797	0.958374	-311.688	38.4108	89.8955	-86.9557	-14.8379	41.0483	35.1078	-1.53992	-47.7938	-72.9104	-24.614	37.2563	-107.458	7.16724
33.9523	39.3119	-58.7662	26.6805	62.0657	67.4817	-39.5477	119.429	-37.042	-32.9674	9.45618	132.155	83.7512	-1.77478	1.33167	49.9995	-140.24	-265.856	40.1356	153.012	126.117	-22.3374	-308.331	-89.7297	-49.3669	217.734	-30.3835	22.9421	-7.14453	-378.575	-170.912	16.2374	74.61	-105.231	0.00134277	-313.716	37.8306	90.0942	-87.1237	-15.0514	41.7653	35.0938	-1.56494	-47.2954	-73.1819	-24.4468	37.7589	-107.729	6.98633
34.7433	39.37	-58.7358	26.9086	61.2205	68.6809	-39.5137	119.933	-38.1047	-33.6721	9.68518	132.516	84.7363	-2.63281	1.33459	49.3007	-140.836	-266.752	40.2948	153.625	126.349	-23.4603	-309.248	-89.9027	-49.4962	218.02	-29.9102	22.1213	-6.15063	-379.171	-171.201	16.0839	74.8119	-105.559	-1.59863	-315.156	37.6163	90.2156	-87.5037	-15.3447	43.0171	35.0745	-1.3877	-47.1182	-74.1895	-25.1951	38.6375	-108.287	6.32397
35.7115	39.3439	-58.8616	27.0991	60.6371	69.4701	-39.5471	119.806	-38.8333	-34.3372	9.85779	133	85.496	-2.99536	1.35486	48.7939	-141.691	-267.689	40.5916	154.816	126.828	-24.3004	-310.102	-90.3232	-49.6071	218.989	-29.501	21.5685	-4.10974	-380.849	-171.221	15.7541	75.3862	-106.334	-2.95605	-317.395	37.3232	90.1008	-88.9591	-15.4531	43.7401	35.0574	-1.05322	-46.8199	-74.3413	-25.8744	39.4868	-108.431	5.76746
37.2382	39.3683	-58.0958	27.4712	60.5413	70.05	-39.6018	119.439	-39.6553	-34.8253	10.1443	134.128	85.9851	-3.68933	1.03491	48.4987	-142.268	-268.177	41.5917	155.085	127.47	-26.0724	-311.269	-90.9849	-50.194	218.885	-28.972	21.3003	-2.82019	-383.924	-171.647	15.3762	76.1547	-107.205	-4.34033	-318.211	37.2687	90.0327	-90.266	-15.8146	44.5999	34.6143	-0.782959	-46.73	-74.4689	-26.0649	39.8821	-108.636	5.98242
37.8198	39.535	-57.1453	27.8304	60.59	70.2761	-39.5874	119.082	-40.8428	-35.3557	10.2836	134.777	87.157	-4.401	0.637817	47.9	-143.564	-268.683	41.9199	155.181	127.877	-27.3108	-313.066	-92.1688	-50.7167	218.746	-28.2728	21.1465	-2.53833	-384.521	-172.041	15.1093	76.4011	-107.995	-5.35437	-319.79	37.2155	90.1306	-90.6056	-16.1862	45.9003	34.0505	-0.913086	-46.9984	-74.5286	-25.9287	40.2454	-108.756	6.0708
38.0774	39.8302	-56.5642	28.5082	60.8617	70.4944	-39.5386	118.392	-41.9283	-36.2007	10.3335	135.919	88.0629	-4.93848	0.394653	47.3073	-144.94	-268.873	42.2639	155.626	128.291	-28.4552	-314.975	-92.2001	-50.6371	218.619	-27.8854	20.0803	-2.16431	-385.607	-172.525	14.9001	76.3787	-108.361	-6.59387	-321.91	37.162	90.0763	-91.3484	-16.5005	47.4066	33.5006	-0.157593	-46.6527	-74.8781	-25.5562	40.1731	-108.524	5.94263
38.1091	40.8265	-55.9071	28.8977	61.442	70.8793	-39.6763	118.371	-43.4094	-37.5985	10.2924	136.295	88.9969	-6.01318	0.196777	47.3927	-145.585	-269.959	42.4862	156.103	128.034	-29.9224	-315.672	-92.2642	-51.1719	219.532	-27.8378	18.3342	-2.16467	-387.849	-172.835	14.6472	76.6472	-108.514	-7.52844	-323.214	36.876	89.9109	-92.2308	-17.3113	48.726	33.2291	0.844849	-46.3412	-75.2024	-24.5549	40.6287	-108.509	6.0686
37.9937	40.9069	-55.484	29.2819	61.9897	70.402	-39.9065	118.437	-45.353	-39.3256	10.2262	137.751	89.4485	-6.72485	-0.224609	47.8967	-146.478	-270.585	42.7325	156.652	128.534	-30.9575	-316.062	-91.7478	-51.7916	220.419	-27.5793	17.4517	-1.58569	-389.671	-173.27	14.4344	77.0011	-109.035	-8.53442	-324.383	36.7695	89.9629	-92.2352	-18.663	49.1884	32.9982	1.79053	-46.0574	-75.505	-24.1111	41.29	-108.424	6.25024
37.858	41.1956	-54.9949	29.0812	62.9111	70.3422	-40.1188	118.416	-45.7664	-40.1704	9.83008	138.781	89.926	-7.65662	-1.14294	48.2642	-148.321	-271.05	42.8616	157.104	128.904	-32.5127	-317.477	-91.6544	-53.4241	221.034	-27.0538	16.8895	-0.755859	-389.788	-174.04	14.4015	77.5348	-109.212	-9.79968	-325.288	36.9695	90.1887	-93.1152	-19.3423	49.9113	33.0529	2.85217	-46.1797	-75.7047	-24.6793	41.8115	-108.265	6.43127
37.4984	42.3719	-54.3083	30.2189	64.5784	69.9476	-40.1138	118.459	-44.9624	-41.0159	9.27002	139.867	90.0277	-8.15088	-1.74561	49.0601	-148.674	-271.36	42.9175	157.483	128.541	-33.4493	-318.305	-89.8774	-54.7972	220.761	-26.5842	16.5615	-0.0598145	-390.425	-174.763	14.3341	77.9037	-108.881	-10.5433	-328.143	36.8069	90.3445	-93.2725	-21.3929	51.6746	33.0582	2.81934	-46.0886	-76.4894	-25.5807	41.9769	-108.372	6.85254
36.8359	43.3687	-53.9242	31.426	65.8398	69.0211	-39.9834	118.244	-43.0568	-41.9399	8.88623	140.457	90.1609	-8.30432	-2.28723	49.0761	-149.285	-272.335	43.1929	157.303	128.336	-35.4142	-319.536	-88.4763	-56.025	220.712	-26.3186	15.6155	0.570801	-391.928	-175.041	14.2804	78.0525	-108.311	-11.093	-329.276	36.728	90.3132	-93.7703	-22.1243	52.1433	33.1981	3.2085	-45.9009	-77.3701	-26.0038	41.7023	-108.124	7.08337
36.2639	44.4736	-52.838	31.9741	66.5854	68.7416	-39.8044	118.029	-41.6252	-43.6036	8.4751	140.982	90.5485	-8.25891	-3.47864	49.0957	-151.084	-272.97	43.5343	156.828	128.301	-36.436	-320.108	-87.8928	-56.4242	220.516	-25.8135	14.8357	0.501221	-392.715	-175.032	14.345	78.3217	-108.27	-12.6896	-330.155	36.5571	90.2355	-93.2565	-22.5519	52.009	33.3672	3.61267	-45.8695	-77.9094	-25.9271	41.8383	-108.476	7.02893
35.6599	45.6073	-52.1882	32.3395	67.4086	68.0398	-39.7469	117.839	-40.2141	-44.8018	7.46301	141.363	90.7783	-8.17578	-4.2793	48.9686	-152.234	-273.617	43.4232	156.283	127.875	-37.8118	-321.067	-86.9294	-56.7449	221.124	-25.1339	14.4618	0.533081	-393.953	-175.452	14.1632	79.9152	-108.464	-13.6053	-330.954	36.1631	90.1671	-91.438	-23.389	51.3894	33.7802	3.98999	-45.599	-78.2249	-25.9117	42.6165	-108.37	6.93396
35.0986	46.3057	-51.8618	32.7142	68.5973	66.5601	-39.3663	117.529	-39.9972	-45.3835	7.02319	142.101	91.074	-7.56909	-5.03491	48.4758	-153.496	-273.99	43.7654	155.94	126.767	-38.7264	-322.23	-86.2307	-58.1061	221.785	-24.6669	14.5341	0.462646	-394.157	-176.929	14.0349	80.8646	-108.655	-14.3309	-332.958	35.8357	90.2479	-91.5502	-25.2842	51.3269	34.1296	4.0127	-45.2603	-78.8977	-25.1316	43.5616	-108.437	7.09033
34.3186	46.9495	-51.2913	32.5247	69.9717	65.9303	-39.1936	117.485	-40.553	-46.0696	7.14185	142.923	91.3047	-6.92896	-5.38647	46.9792	-154.444	-274.695	44.7888	155.976	126.493	-40.0612	-324.148	-85.3073	-59.9592	222.288	-24.5553	14.4062	0.487061	-394.308	-178.218	13.8665	82.2798	-108.999	-15.0154	-334.161	35.4558	90.3043	-92.963	-26.2168	50.1346	34.9556	4.35681	-44.9089	-79.9757	-24.4746	44.0544	-108.431	7.25427
33.5907	47.5477	-50.8484	31.7845	70.6509	65.2271	-38.9647	117.539	-40.7854	-46.8763	7.74341	143.778	91.6346	-6.06519	-5.354	46.0421	-155.251	-275.401	44.8026	155.844	125.909	-42.4662	-325.217	-84.9728	-61.4824	222.105	-24.2185	14.0052	0.340576	-394.77	-179.741	13.7106	82.6531	-109.532	-15.6725	-334.874	34.8645	90.2871	-93.583	-26.5549	51.2451	35.702	5.27991	-44.4379	-80.2678	-23.9943	44.2166	-108.358	7.46594
33.226	48.0404	-50.7581	30.5673	71.2106	64.271	-38.6223	116.29	-40.8098	-48.0261	8.10693	144.277	91.6473	-5.83972	-5.41833	45.5551	-155.976	-275.31	44.6739	155.835	124.969	-43.3662	-326.228	-84.8469	-61.4084	222.102	-23.6635	13.5372	0.325684	-395.259	-181.046	13.8193	82.9414	-110.483	-16.7292	-335.187	34.4073	90.3081	-93.6754	-27.3064	52.135	36.4385	6.08606	-43.9281	-80.6121	-23.028	44.298	-108.213	7.48657
32.3203	48.6427	-50.506	29.2196	71.8467	63.9431	-38.5483	115.453	-40.668	-49.1266	8.74487	144.507	91.8749	-5.95813	-5.32629	45.2905	-157.577	-275.335	44.6791	155.703	124.578	-44.257	-327.845	-84.8478	-61.7966	222.057	-23.1008	12.8756	0.3573	-395.586	-181.962	14.0548	83.8813	-111.688	-17.5032	-335.753	33.807	90.3107	-93.8947	-29.6838	52.6714	37.6344	6.22888	-43.6439	-81.3152	-23.3632	42.8886	-108.275	7.37524
31.1766	49.1865	-50.0665	28.0222	72.1648	62.8339	-38.392	114.976	-40.3136	-50.5062	9.65771	144.494	92.5277	-5.54968	-5.20032	45.04	-158.057	-275.324	44.9521	155.683	123.832	-46.2134	-329.041	-84.8873	-62.8157	222.683	-22.2305	12.5018	0.208618	-396.009	-182.577	14.1094	84.5747	-112.299	-18.2294	-336.532	33.2416	90.2421	-94.3986	-31.3202	53.2432	37.8756	6.19153	-43.1987	-82.0873	-22.9519	42.1067	-108.044	7.42834
29.2555	49.4779	-49.679	27.2937	72.7023	61.9495	-37.8887	114.066	-40.0607	-51.7086	10.2144	144.238	92.4388	-4.84009	-5.21753	44.5441	-159.446	-275.302	44.9481	155.671	122.837	-48.1033	-329.787	-84.2135	-65.093	223.476	-21.2015	11.9209	0.691528	-396.531	-184.404	14.3175	85.2965	-113.475	-18.9194	-336.901	32.9308	90.2406	-94.5059	-32.1729	53.6132	39.0436	6.13416	-42.4064	-82.7505	-22.6384	40.0912	-107.784	7.47327
28.5127	49.573	-49.2148	26.4993	73.2568	61.5293	-37.5516	113.655	-39.6923	-53.1833	10.7134	143.715	91.8995	-4.54309	-5.36108	44.0297	-160.587	-275.206	45.3379	155.043	121.743	-48.5847	-330.513	-83.5686	-65.4049	224.304	-20.5455	11.7802	1.60474	-397.436	-185.648	14.3447	86.2848	-114.899	-20.7186	-337.722	32.4268	90.2465	-95.0421	-33.1803	53.7019	39.4266	5.87646	-41.7393	-83.6958	-22.0891	39.0865	-107.137	7.5575
27.8389	50.002	-48.9803	26.7708	73.8287	61.0074	-37.2393	113.334	-39.075	-54.0526	10.9589	143.26	91.2598	-4.10645	-5.43494	43.5908	-162.678	-274.685	45.3693	154.476	120.804	-49.1416	-331.629	-83.7136	-66.0269	224.069	-20.2112	10.7427	2.10559	-398.374	-186.576	14.0984	87.6729	-115.972	-22.6967	-338.67	32.3949	90.2678	-95.2294	-35.288	53.5869	40.5326	5.3573	-41.6063	-84.8518	-21.4097	38.4258	-107.105	7.57141
25.787	50.49	-48.8036	26.743	74.1107	60.719	-36.6123	111.973	-38.2236	-54.7899	11.5448	142.855	90.4838	-4.06177	-5.34082	43.1299	-163.414	-274.51	45.4006	154.335	119.918	-49.8849	-333.003	-83.7463	-67.1471	223.859	-19.5287	9.86914	2.66516	-398.629	-186.746	13.8032	88.6387	-117.087	-23.1047	-339.039	32.6459	90.2688	-93.9821	-36.5382	53.4576	42.2555	4.85645	-40.9562	-85.7947	-20.8601	37.2792	-107.406	8.14966
25.2905	50.7075	-48.4819	26.3008	74.7878	59.6244	-36.2168	110.741	-36.5037	-55.4403	11.3131	142.58	89.9457	-4.57495	-5.27649	42.8359	-163.635	-274.176	45.5107	153.941	118.791	-50.9076	-334.503	-84.1351	-68.9199	223.46	-18.663	9.29761	3.25623	-400.409	-186.837	13.5526	89.1233	-118.042	-23.8253	-340.26	32.6344	90.2593	-92.9347	-37.0149	54.6788	42.5491	5.0033	-39.8258	-86.3438	-20.7197	36.2917	-107.777	8.35254
23.7024	50.8469	-48.361	26.0607	75.2899	59.4772	-35.8612	110.331	-35.7096	-56.7949	11.1415	142.23	89.4099	-4.87134	-5.1499	42.75	-163.911	-275.44	45.719	153.27	117.366	-51.5795	-335.038	-84.5339	-70.7197	223.401	-18.3546	8.97009	3.38867	-401.049	-186.897	13.1028	89.6321	-119.771	-25.326	-341.761	32.5323	90.3043	-92.4474	-38.7849	55.882	44.2817	4.98328	-39.0233	-86.8926	-20.5183	35.5044	-108.207	8.33875
22.6483	50.98	-48.3016	26.0138	76.3728	58.9214	-35.6758	109.904	-34.5111	-58.0426	10.7861	142.077	88.7067	-4.88123	-5.04626	42.699	-164.393	-276.734	45.7126	152.547	115.909	-53.0099	-335.437	-85.8289	-71.9141	223.872	-17.767	8.0293	3.48206	-401.938	-186.91	12.4558	90.6814	-120.902	-26.8302	-343.339	32.575	90.3663	-91.962	-41.7112	56.9391	45.4819	5.41895	-38.4352	-87.3102	-20.5957	34.703	-108.858	7.80823
21.9487	51.3187	-48.2556	26.0594	77.0802	58.2146	-35.4153	108.644	-32.9248	-59.2551	10.2015	141.973	87.3245	-4.81409	-5.02734	42.4282	-164.821	-277.199	45.8082	151.436	114.397	-53.9779	-335.875	-86.5618	-72.1044	224.779	-17.2705	7.35449	3.38647	-402.442	-187.042	12.0762	91.5009	-121.379	-27.5547	-344.436	32.9379	90.5284	-92.1744	-42.0111	57.807	46.4625	5.82288	-37.5122	-88.3445	-20.4944	33.8286	-110.544	7.57361
21.1447	51.5096	-48.3695	26.0994	77.6613	57.6794	-34.7456	107.059	-31.5463	-60.0927	10.0024	141.761	86.2656	-4.70154	-5.06055	41.9186	-165.347	-276.984	46.4261	150.66	113.385	-53.6329	-336.282	-87.6344	-73.6257	225.148	-17.1586	6.68896	3.47656	-403.475	-187.494	11.6144	91.7263	-122.445	-28.0781	-345.381	33.2936	90.7612	-92.7341	-43.1093	57.8025	48.5355	6.28467	-36.774	-89.2401	-20.5013	33.2877	-111.708	7.20691
20.6565	51.6208	-48.4822	26.1953	78.2844	57.6639	-34.4047	106.041	-30.1145	-61.0945	8.83728	141.644	85.8448	-4.41846	-5.078	41.486	-166.346	-276.922	46.7223	149.993	111.101	-54.043	-336.944	-89.0276	-74.4719	225.048	-17.3795	6.28662	3.57141	-405.086	-187.626	11.3378	92.4072	-124.758	-29.9247	-346.798	33.4454	90.8529	-92.9891	-44.9375	58.0397	49.6455	6.93408	-35.7571	-89.5258	-20.554	32.537	-112.404	7.18567
19.9895	51.4615	-48.5404	26.3981	79.1049	58.2926	-34.1677	105.663	-29.4698	-61.7719	7.81213	141.727	85.1802	-4.45081	-5.16516	40.7899	-167.241	-276.923	46.9003	149.203	110.837	-55.0217	-337.227	-89.9883	-75.6892	224.891	-17.4287	6.09937	3.13306	-405.76	-188.117	11.0756	92.7393	-126.135	-31.1812	-348.625	33.8521	90.7302	-93.0643	-47.0477	59.0988	50.4772	7.46899	-35.0864	-89.9323	-21.0382	32.2325	-112.166	7.21387
19.0107	51.4771	-48.5106	26.4231	79.8448	58.8975	-34.0114	105.557	-28.8093	-62.8137	7.47485	141.607	84.7423	-4.33386	-5.42786	40.2264	-168.382	-276.837	47.0527	148.019	108.873	-56.3458	-337.547	-90.3171	-76.0747	225.135	-17.5881	5.14954	2.77295	-406.48	-188.834	10.3346	92.8375	-126.439	-31.7701	-350.332	34.0743	91.0942	-93.2539	-47.8295	61.0582	51.1683	7.46436	-33.3298	-90.8337	-21.1759	32.0303	-111.837	7.2384
18.3409	51.3047	-48.2	26.2891	80.632	59.6353	-33.5497	105.921	-29.1494	-63.6643	7.12915	141.612	84.624	-4.32568	-6.08911	38.7711	-169.111	-276.702	47.1835	146.536	108.363	-56.6169	-338.188	-91.0322	-76.5122	225.47	-17.8043	4.81323	2.80835	-407.816	-188.817	9.43335	93.1302	-127.128	-32.1744	-351.44	34.9813	91.4137	-93.1135	-48.0643	62.8196	52.175	7.77234	-31.8887	-91.7303	-20.9653	31.6178	-112.362	7.18213
17.7125	51.2534	-48.0216	26.3979	81.0908	61.1578	-33.3245	106.423	-29.2795	-64.311	6.81506	141.765	84.882	-4.30957	-6.50623	37.624	-171.52	-277.086	47.5315	145.516	107.638	-56.7235	-338.728	-92.929	-78.324	225.657	-18.0975	4.47766	2.94006	-410.045	-188.964	9.13843	93.1536	-128.686	-33.7113	-352.978	35.4766	91.821	-93.3926	-50.3419	63.9817	53.109	7.92737	-31.2012	-92.0406	-20.9788	30.9264	-113.876	7.26599
17.1526	51.3059	-47.8945	26.2246	81.6335	61.8278	-33.1954	106.951	-29.6221	-64.8833	6.27795	142.033	84.9712	-4.3197	-6.78931	37.1428	-172.474	-277.563	48.2202	145.513	106.348	-56.1649	-338.975	-93.9001	-79.2083	225.847	-18.5214	4.08972	3.08875	-410.739	-188.997	8.55127	92.953	-131.087	-35.7654	-355.012	36.0769	91.9952	-92.9657	-52.517	64.0598	55.077	8.14478	-30.9409	-92.3942	-21.0565	31.0544	-115.261	7.20654
16.8693	51.1652	-47.9762	25.8007	82.5203	61.7688	-33.2512	107.11	-30.0997	-65.512	6.03345	142.486	85.1412	-4.32556	-7.49634	36.2778	-173.54	-278.301	48.6331	144.665	105.093	-55.9785	-339.303	-94.5559	-80.1188	226.165	-18.6711	4.17419	3.21533	-410.896	-188.626	7.38159	92.7721	-131.5	-36.5306	-357.201	38.4276	91.985	-92.4222	-52.4458	64.6603	55.6678	8.48791	-30.8248	-92.8203	-20.9363	31.2501	-115.035	7.44141
16.2747	51.0764	-47.9125	25.4282	83.0271	61.4523	-33.3662	107.172	-30.5662	-66.1003	5.72327	142.863	85.3107	-4.32666	-7.4325	34.9476	-175.373	-279.049	49.1699	143.12	104.259	-55.9547	-339.579	-94.6799	-81.3629	227.728	-18.863	3.80701	3.20239	-412.019	-188.186	6.94629	92.4943	-132.525	-37.2617	-358.308	39.0732	92.1935	-91.9084	-51.4028	65.5503	56.9309	8.99158	-29.4816	-93.7115	-20.8652	30.7837	-115.356	7.63208
15.3136	50.9894	-47.9617	24.8462	83.2761	60.9426	-33.3453	107.369	-30.387	-66.2734	5.82458	142.861	85.3232	-4.32458	-7.25513	33.9984	-175.553	-279.934	49.412	141.274	103.583	-55.4518	-340.58	-94.8054	-82.7372	228.733	-19.1953	3.56934	3.06897	-412.966	-187.786	5.64539	92.4916	-134.187	-39.4291	-359.293	40.2261	92.4833	-90.5947	-49.47	65.6825	58.4266	9.34375	-28.8293	-93.9283	-20.8131	30.8717	-115.136	7.54517
14.7019	50.786	-48.4698	24.4497	84.4421	60.213	-33.2108	107.624	-29.7029	-66.2473	5.93359	143.091	85.4313	-4.34802	-6.9657	33.0767	-176.143	-281.023	49.6921	140.55	102.954	-55.0166	-341.109	-95.3501	-83.6082	229.664	-19.3707	2.9884	3.03992	-413.929	-187.251	4.11682	92.1597	-136.35	-40.6234	-360.634	41.7128	92.5741	-89.1896	-48.0494	66.6537	58.7195	9.65088	-28.1625	-94.1614	-20.6035	30.3611	-114.979	7.20508
14.0856	50.4353	-48.6199	24.0771	85.8396	60.1398	-32.7888	107.687	-29.1351	-66.1112	5.85999	143.102	85.4583	-4.3103	-6.20923	32.6697	-177.748	-282.089	49.8136	140.022	101.513	-54.6029	-342.187	-95.7452	-84.2052	229.847	-19.5043	1.84058	2.99329	-414.576	-186.781	3.39124	92.5259	-137.315	-41.4231	-363.434	42.7347	92.9497	-88.3109	-47.3112	68.1227	58.6453	10.2699	-26.4503	-94.3475	-20.7617	28.9954	-115.047	7.05957
14.3589	50.3691	-49.35	23.7024	86.0309	60.5095	-32.5728	107.808	-28.2329	-65.9612	5.8894	143.136	85.6477	-4.31934	-5.80493	32.4142	-179.218	-282.653	49.8223	139.071	101.542	-54.488	-342.923	-95.9968	-84.4506	231.022	-19.4327	0.942261	2.95569	-416.28	-186.346	3.02307	92.7462	-138.188	-41.7794	-364.235	43.2928	93.2211	-87.9678	-47.6073	68.6453	59.4769	10.5159	-25.4137	-94.2961	-20.8398	28.2953	-116.26	6.62683
15.3317	50.1729	-50.2286	23.8806	86.4109	60.9524	-32.3269	107.606	-27.4468	-65.5643	5.99683	143.214	86.1691	-4.30371	-5.20898	31.9578	-180.136	-283.994	49.7156	137.395	101.203	-54.6855	-343.512	-96.0979	-85.0179	233.098	-19.6686	0.280273	3.10315	-417.102	-185.943	2.09888	93.0103	-138.717	-44.384	-364.711	43.9457	93.6068	-89.1809	-47.4498	68.804	59.8112	11.098	-24.0331	-93.7847	-20.5614	26.7212	-118.534	6.36572
16.6775	49.589	-51.014	23.8625	86.9789	61.5125	-32.2283	107.41	-26.2003	-65.1019	6.45728	143.301	86.7589	-4.30322	-4.81299	31.8809	-180.508	-284.864	49.9282	136.819	101.155	-55.6747	-343.969	-96.0767	-85.7927	233.617	-19.967	-0.302124	3.2113	-415.535	-185.76	0.573364	93.4615	-139.816	-46.0626	-365.43	45.6442	94.0598	-91.0746	-47.5673	69.002	60.0332	11.3854	-23.2102	-93.541	-20.1714	26.0216	-119.783	6.21204
17.6287	48.7877	-51.4291	24.0295	87.1333	63.3258	-32.2068	107.512	-25.3594	-64.328	7.13843	143.311	87.4534	-4.29736	-3.89441	31.9091	-180.004	-285.165	50.2323	136.282	100.945	-56.7325	-344.665	-96.2498	-87.3439	233.743	-20.5206	-0.563354	3.19885	-413.929	-185.689	-0.221802	94.0005	-140.764	-46.5986	-366.946	47.0856	94.0881	-93.9637	-47.7506	69.1119	60.1295	11.8331	-22.3979	-92.9229	-19.9906	24.6986	-121.234	5.6311
18.6201	47.7972	-51.6525	24.142	87.2612	64.3088	-32.037	107.317	-24.457	-63.9893	8.23547	143.75	87.8917	-4.3396	-2.77783	31.7349	-178.143	-285.819	50.4948	135.813	101.044	-57.4436	-344.758	-96.4424	-88.5844	233.717	-20.8535	-1.02002	2.78931	-411.877	-185.293	-0.984497	94.2645	-141.275	-47.374	-368.795	49.069	94.1001	-94.7163	-47.8328	69.2771	60.2024	12.337	-20.8511	-92.2406	-19.6075	22.9135	-121.737	4.89038
19.4882	46.8011	-51.6641	24.3921	87.1908	64.8503	-31.9307	107.222	-23.5779	-62.8958	9.09949	144.117	88.1531	-4.3147	-1.63818	31.5175	-176.418	-286.7	50.6111	135.264	101.22	-58.2045	-344.658	-96.6702	-89.4581	233.844	-21.1748	-1.72217	2.73499	-409.795	-185.072	-1.2854	94.3678	-142.363	-48.5577	-369.451	50.1331	94.0017	-96.5291	-47.9998	69.067	60.1498	12.7028	-20.526	-91.3652	-19.0226	20.6104	-123.626	4.06006
19.7949	46.2826	-51.5731	24.7098	87.2739	65.4375	-31.8884	107.084	-22.8278	-62.0863	9.76184	144.669	88.3542	-4.29993	-1.07275	30.77	-174.332	-287.851	50.7601	134.765	101.324	-59.26	-344.587	-96.895	-90.2415	233.703	-21.7628	-2.35864	2.70154	-408.608	-184.98	-1.34375	94.1943	-143.058	-50.0812	-369.933	50.8365	93.9753	-97.0085	-47.6659	68.4779	60.641	13.2893	-19.7816	-89.7444	-18.5577	19.8827	-125.653	3.27026
19.9188	46.0988	-51.4915	24.796	87.2772	66.1519	-31.9243	107.125	-22.4404	-61.3735	10.4742	145.358	88.6858	-4.30396	-0.25647	30.4919	-173.451	-288.607	51.2246	133.871	101.581	-60.4725	-344.807	-96.9202	-90.7097	233.725	-21.9064	-2.5592	2.84814	-408.279	-185.139	-1.45203	94.2485	-143.468	-50.8783	-369.926	53.225	93.8851	-97.755	-47.3867	68.7279	61.2814	13.7197	-19.2522	-89.0125	-18.3657	18.8433	-126.757	2.83887
20.1414	45.3519	-51.4656	25.5308	87.2563	66.9828	-32.1549	107.11	-22.4893	-60.5884	11.2086	145.509	88.9138	-4.31909	0.865601	30.2419	-173.011	-289.382	51.9996	133.191	101.865	-61.661	-345.067	-96.7045	-91.2352	233.442	-21.9071	-2.82434	2.99219	-408.071	-185.545	-1.95923	94.361	-144.515	-51.2623	-368.732	53.5369	93.6063	-98.3995	-46.2542	68.1611	62.4265	14.225	-19.3567	-88.6588	-17.968	17.9219	-126.961	2.14807
20.1575	44.1707	-51.488	25.8573	87.3312	67.3226	-32.1736	107.008	-22.924	-60.3856	12.162	146.004	89.1123	-4.30298	2.1748	29.5093	-172.658	-289.85	52.4523	131.508	102.076	-62.7279	-345.221	-96.3413	-91.9526	233.551	-21.8483	-3.69324	3.27905	-406.979	-185.868	-2.16113	94.4498	-145.713	-52.6113	-367.611	55.2217	93.3645	-98.9938	-45.4249	66.8915	63.2072	14.9076	-19.1194	-87.9285	-17.7769	16.7787	-127.473	1.80396
20.1526	43.2128	-51.4828	25.6693	87.2972	68.1209	-32.1588	106.878	-23.9604	-60.158	13.2011	146.94	89.2687	-4.3114	2.78931	28.8676	-172.077	-289.762	52.9102	130.077	101.783	-64.2982	-345.557	-96.0659	-92.4391	233.555	-22.077	-4.64417	3.34692	-405.825	-186.434	-2.32727	94.3394	-146.123	-54.8473	-366.081	56.5898	93.2369	-100.643	-44.9977	66.3245	63.483	15.6848	-19.4771	-87.4297	-17.6116	16.4137	-127.972	1.38391
20.1521	42.6648	-51.2357	25.5339	87.2512	69.0204	-32.2178	106.749	-24.809	-60.2091	14.0909	147.912	89.4515	-4.29944	3.23425	28.2239	-171.627	-289.723	53.1726	128.463	101.718	-65.1982	-345.945	-95.8832	-92.7942	233.791	-22.5021	-5.04578	3.30078	-405.132	-186.856	-2.40405	94.3237	-147.18	-55.5859	-363.505	56.7587	92.6284	-102.22	-43.9282	66.4915	63.2197	16.261	-20.1763	-86.3777	-17.3845	14.9564	-128.862	0.972534
20.1614	42.1984	-50.9863	25.3593	87.2604	69.1808	-32.3759	106.61	-26.0378	-60.1436	14.6858	148.402	89.4045	-4.33704	3.90332	27.3793	-171.877	-289.736	53.4362	128.065	101.638	-66.1017	-346.866	-95.9548	-93.8982	234.674	-22.696	-5.70093	3.24011	-405.443	-187.215	-2.55139	94.1483	-147.671	-56.0411	-361.733	57.7725	92.6249	-102.607	-43.7086	66.9211	64.215	16.5648	-20.4639	-85.7004	-17.4365	15.2642	-129.98	0.613647
20.161	40.9512	-50.9324	25.2556	87.3557	69.5886	-32.7662	106.665	-27.1289	-59.9318	15.7527	148.81	89.2255	-4.30054	4.95532	26.1229	-172.086	-289.563	53.6104	127.855	101.779	-66.8484	-347.742	-96.155	-95.424	234.871	-22.7838	-6.26953	3.27942	-405.518	-187.659	-2.52942	94.1671	-147.871	-57.7065	-360.364	59.1903	92.4708	-102.504	-42.0551	67.0485	65.1324	16.9802	-20.8224	-85.7274	-17.3971	16.5621	-130.113	0.59729
20.0441	39.9915	-50.8019	25.2286	87.6969	69.8341	-33.4993	106.802	-27.4376	-59.6022	16.7598	149.347	89.2255	-4.32275	5.64014	25.8904	-172.255	-289.422	54.0754	126.244	102.206	-67.4768	-348.575	-96.1617	-95.9929	236.139	-23.184	-7.70447	3.21143	-404.39	-188.406	-2.33411	94.4187	-147.751	-59.4375	-359.519	60.6676	92.1638	-102.477	-40.9362	66.5005	66.8732	17.3248	-20.5278	-85.9965	-17.4572	17.4569	-131.933	0.234985
18.9366	39.3732	-50.6937	25.3533	88.4346	69.87	-34.1631	106.689	-27.0948	-59.522	18.084	150.008	89.3163	-4.30652	6.50452	25.9291	-172.146	-289.427	54.109	125.405	102.621	-68.8787	-350.259	-96.085	-96.2219	237.061	-23.4166	-8.72119	3.32214	-403.246	-188.558	-2.10229	94.2476	-147.37	-60.7485	-357.966	62.703	91.9044	-102.031	-39.2636	65.9309	68.9625	18.0958	-21.9946	-86.0344	-17.4559	18.0983	-132.628	-0.00134277
18.2719	38.783	-50.3972	25.2979	88.8899	69.516	-34.3003	106.459	-27.1401	-59.6254	18.9437	150.511	89.6428	-4.30872	7.04858	25.9423	-171.704	-289.707	54.2689	124.458	102.716	-69.4495	-352.142	-96.1487	-96.2573	237.711	-23.6787	-9.74927	3.16882	-403.177	-189.121	-2.08972	94.3612	-145.701	-61.6636	-356.156	63.0535	91.4702	-101.791	-38.1394	65.6544	68.8816	18.4834	-23.3027	-85.7268	-17.5533	18.9755	-134.567	-0.145142
17.6696	38.6604	-50.2554	25.2611	89.5098	68.9066	-35.5815	106.233	-27.2498	-59.8433	19.6057	151.094	89.6718	-4.30701	7.53076	25.8776	-170.814	-289.937	54.4935	123.932	102.62	-70.2495	-353.208	-96.2537	-96.2605	238.797	-23.8164	-10.2589	2.75415	-403.106	-189.518	-2.22571	94.0826	-143.987	-62.9351	-355.293	63.3685	91.1584	-102.343	-36.4403	65.8137	69.3842	18.8066	-24.7952	-85.5598	-17.7188	19.769	-136.671	-0.489014
17.2474	38.7323	-49.9531	25.1892	89.7666	68.3157	-36.2139	106.082	-27.2158	-60.1132	20.562	151.745	89.8834	-4.28418	8.4967	26.0685	-170.68	-290.28	54.7251	122.269	102.753	-70.4917	-354.338	-96.2844	-96.3326	238.919	-23.8347	-11.0366	2.96704	-402.847	-190.217	-2.11633	94.1375	-142.958	-63.9999	-354.815	64.1107	91.079	-103.201	-35.4928	66.069	69.9946	18.9446	-24.6611	-85.3998	-17.6621	20.1821	-137.203	-0.761108
16.5869	38.6978	-49.8888	25.1315	91.1069	67.8878	-37.2068	105.807	-27.0168	-60.1234	22.186	152.848	89.9159	-4.29663	8.24951	26.1202	-170.138	-290.813	55.022	121.264	102.989	-71.0994	-356.314	-96.2867	-95.5018	239.063	-23.76	-11.342	3.24133	-402.92	-190.983	-2.08606	94.2157	-142.048	-65.5992	-353.865	66.3778	90.7343	-103.557	-35.3672	66.553	72.0613	19.1083	-24.8965	-85.5402	-17.745	20.0884	-137.816	-1.04407
15.2622	38.2159	-49.7966	25.1099	91.9773	67.5272	-39.0564	105.664	-26.8184	-60.3732	23.0819	153.344	89.9109	-4.34814	8.27991	26.0726	-169.616	-291.076	55.0013	120.162	103.001	-71.5587	-357.999	-96.1851	-95.3826	239.14	-23.7977	-12.6733	3.46741	-402.958	-191.476	-2.11157	94.234	-140.749	-66.4039	-353.349	67.4232	90.5508	-104.234	-33.9402	66.879	73.7778	19.1639	-25.0852	-86.0964	-17.6892	19.9531	-139.604	-1.75232
14.0909	37.6882	-49.9686	25.1082	93.0183	67.4762	-39.6954	105.672	-26.7571	-60.4103	23.7123	153.902	89.9027	-4.37122	9.34082	26.3535	-169.32	-291.401	54.8314	119.59	102.973	-71.7074	-358.938	-96.022	-95.348	239.042	-23.7527	-13.9471	3.68506	-401.87	-192.257	-2.23157	94.9845	-139.666	-67.0138	-354.096	68.1348	90.0654	-105.553	-32.9535	66.9852	74.618	19.2021	-25.4111	-86.3785	-17.1063	19.9343	-140.23	-2.32605
13.5651	37.3966	-50.6936	25.2117	93.8243	67.1837	-40.2458	105.33	-26.7161	-60.288	24.4736	154.419	89.2933	-4.29492	9.62231	26.8628	-169.325	-291.87	54.9138	119.324	103.015	-72.3263	-360.429	-95.8405	-95.5073	238.621	-23.7963	-14.8593	4.09155	-400.337	-193.081	-2.94238	95.5394	-138.625	-67.8967	-354.444	68.762	89.6737	-107.127	-32.1636	67.3361	74.9943	19.3007	-25.9635	-86.424	-16.6993	20.0166	-140.858	-2.95496
12.896	36.9059	-51.563	25.3127	94.3285	66.6688	-41.1338	106.132	-27.1865	-60.0707	25.5557	154.968	88.7953	-4.32263	9.59668	27.2041	-170.044	-292.387	54.9573	119.229	102.967	-72.6433	-361.449	-95.8623	-95.5511	237.772	-23.7279	-15.1123	4.93579	-399.514	-193.806	-3.573	96.0433	-137.921	-68.7982	-354.541	69.6107	89.4373	-109.24	-31.1439	67.1818	75.7541	19.2335	-25.869	-86.2018	-16.6237	20.0288	-141.631	-3.43286
13.0789	35.7043	-52.1805	25.2583	94.4646	66.3259	-41.6367	106.659	-27.6216	-59.8486	27.1918	155.601	87.757	-4.35217	9.66541	27.8473	-170.941	-293.011	54.9421	118.413	102.958	-73.5703	-363.644	-95.8909	-95.7432	237.535	-23.7394	-15.6581	5.87769	-398.928	-194.291	-4.09705	96.7174	-137.366	-69.2749	-354.332	70.8358	89.043	-109.818	-30.3365	67.002	76.2006	19.1469	-25.4503	-85.1802	-16.6931	20.4349	-141.953	-3.87952
13.1298	34.8853	-53.0481	25.2	94.3975	65.9204	-43.4232	107.078	-28.6428	-59.8011	27.6119	156.64	86.9143	-4.28003	9.32324	28.1279	-171.879	-293.635	54.9338	117.082	102.946	-75.1847	-364.268	-96.3011	-95.8719	236.785	-23.7743	-16.6543	6.93103	-398.601	-195.708	-4.7428	97.0599	-137.275	-69.3092	-353.942	71.9983	88.7332	-110.776	-29.698	66.489	77.1798	19.0162	-25.5201	-84.4814	-16.5847	20.6602	-142.405	-4.44409
13.4376	33.2446	-53.801	25.0958	94.599	65.4952	-43.6627	107.421	-29.3982	-59.9272	27.8246	157.453	86.6001	-4.31152	8.91003	27.6763	-172.535	-294.546	54.8812	115.909	103.212	-77.1981	-365.579	-96.4893	-96.0724	236.477	-23.7317	-17.2849	7.3313	-398.663	-196.596	-5.52209	97.8424	-137.502	-69.5978	-353.951	73.1289	88.0126	-111.678	-28.1868	65.7402	79.1678	18.8994	-25.3931	-84.3582	-16.6238	21.0658	-142.831	-5.11292
13.5009	33.052	-54.6233	24.7283	94.6451	65.092	-44.9987	107.928	-30.1279	-59.8693	28.3552	157.692	85.9609	-4.31006	8.52795	26.9346	-173.391	-295.207	54.8878	115.229	103.215	-78.484	-366.709	-96.5059	-96.2634	236.503	-23.6749	-17.6128	7.69031	-399.308	-197.154	-6.79285	98.3939	-137.696	-69.5955	-354.656	74.1365	87.6741	-112.678	-26.176	64.9548	79.6461	18.6781	-25.9747	-84.0018	-16.6161	21.7788	-142.956	-5.82166
13.03	31.8733	-55.5938	23.8101	94.6713	64.6877	-45.7207	108.806	-31.1675	-59.7352	28.6415	158.08	84.8474	-4.30566	7.5321	26.1184	-174.986	-296.19	54.9362	114.266	103.001	-79.3026	-368.598	-96.2263	-96.246	236.402	-23.7131	-18.1088	8.28308	-399.785	-197.984	-7.16479	98.989	-137.503	-69.4175	-355.433	74.8401	86.959	-113.337	-24.8965	64.6309	80.671	18.37	-27.3146	-83.6193	-16.6001	22.3313	-143.338	-5.79236
12.91	31.285	-56.4266	23.3037	95.0128	63.8192	-46.2809	109.511	-31.7329	-59.7069	29.7239	158.663	84.0555	-4.30591	7.09314	25.798	-176.17	-296.952	54.9358	112.195	102.535	-81.251	-369.818	-96.1079	-96.0981	236.166	-23.5981	-18.5763	8.50574	-400.456	-199.556	-8.0376	99.5771	-136.775	-69.1069	-356.881	75.2823	86.198	-114.155	-24.4832	64.7628	81.2075	18.058	-29.7081	-83.3383	-16.6497	23.9011	-142.529	-5.755
12.7541	30.3054	-57.3391	23.181	95.2625	63.052	-47.5923	109.319	-32.7219	-59.7858	30.021	159.058	83.5537	-4.27344	5.9552	25.3069	-177.088	-298.22	55.1404	111.209	102.178	-83.8696	-370.633	-95.606	-95.8191	235.594	-23.8634	-19.1564	8.38782	-401.459	-200.94	-9.70483	99.9158	-136.384	-68.7151	-359.227	75.563	85.5353	-115.827	-23.7219	65.7999	82.5819	17.7869	-30.4509	-82.9911	-16.6125	25.4362	-141.867	-5.04285
12.7068	28.7059	-56.8351	22.5652	95.4086	62.5183	-48.6113	109.206	-34.8665	-59.6641	30.5054	159.576	82.907	-4.30933	5.17493	25.0918	-178.236	-298.838	55.7081	110.39	101.885	-84.7034	-371.494	-94.9271	-95.814	234.841	-24.0134	-19.5128	8.01184	-402.185	-200.955	-10.5897	100.126	-135.992	-67.9449	-360.138	75.9164	84.9362	-118.28	-22.662	65.7261	82.7604	17.5874	-28.3213	-82.826	-16.7432	25.9343	-140.901	-4.23718
12.5671	28.6029	-56.4821	21.855	95.6171	62.4252	-49.889	109.2	-36.0084	-59.4653	30.9158	159.76	81.9172	-4.25171	4.3446	25.0187	-179.364	-299.854	56.0566	109.676	101.87	-85.3649	-372.877	-93.7991	-95.8717	234.021	-24.0859	-19.626	7.86804	-403.534	-201.423	-11.2048	100.435	-135.592	-67.5051	-361.057	76.5562	83.9058	-118.915	-21.6904	65.5319	83.4321	17.5165	-28.6565	-82.5712	-17.2854	25.1278	-139.86	-3.42834
12.457	28.6316	-56.4102	20.7203	95.8397	62.5862	-50.473	109.352	-36.8411	-59.2053	30.512	159.658	81.035	-4.34094	3.05786	24.9058	-180.467	-300.464	56.1957	108.103	101.818	-87.109	-374.576	-92.8376	-95.875	232.644	-24.3793	-19.8784	7.77771	-406.378	-203.269	-11.4639	100.62	-135.244	-67.26	-363.537	76.7738	83.4586	-119.833	-20.7394	65.4055	82.005	17.2485	-30.2698	-82.13	-17.03	23.9581	-139.157	-3.91736
12.3057	28.2046	-56.1416	20.147	96.1685	62.8582	-51.0598	109.337	-37.5061	-59.1752	29.9347	159.659	80.7797	-4.36829	2.68921	24.7091	-181.518	-301.38	56.0387	107.04	101.895	-88.6085	-374.936	-92.1477	-95.9077	231.493	-24.9291	-20.2314	7.56287	-407.944	-204.868	-12.4663	100.743	-135.077	-67.0675	-364.75	76.963	82.525	-120.806	-19.6613	65.5254	81.5276	17.0925	-30.7063	-81.2871	-16.6152	23.1324	-138.603	-4.17114
12.2517	27.5968	-56.2017	19.9359	96.1609	62.9377	-51.813	109.196	-38.5884	-59.2532	28.6273	159.267	80.5356	-4.35461	2.54785	24.6528	-183.112	-301.775	55.8783	106.632	101.963	-89.4209	-375.445	-92.4846	-95.9015	229.871	-25.7473	-20.6021	7.60596	-408.564	-205.077	-13.9047	100.988	-134.967	-67.1742	-365.666	77.2762	81.3278	-121.506	-18.285	65.4647	82.0405	16.9163	-31.8289	-80.9004	-16.6655	21.9099	-138.017	-3.92078
12.2031	27.1593	-56.5165	19.6304	96.234	63.0781	-52.3929	109.081	-40.9749	-59.5186	28.0736	158.45	79.9006	-4.31372	2.49927	24.2302	-184.466	-301.97	55.709	106.179	102.116	-90.9149	-377.226	-92.6904	-96.2152	229.092	-25.71	-21.2388	7.36731	-410.65	-205.455	-14.8508	101.114	-135.458	-67.5139	-366.183	77.5292	78.7323	-122.591	-17.4788	65.29	82.7118	16.611	-32.6739	-80.6102	-16.8802	20.2292	-137.304	-3.7981
11.7437	26.9749	-57.0953	19.3534	96.3851	62.9235	-53.7224	108.896	-41.9698	-60.2089	26.7001	157.895	78.3947	-4.33533	2.15466	24.118	-185.908	-302.793	55.4565	105.245	101.764	-91.8385	-378.571	-92.8435	-96.5007	229.496	-25.999	-22.3678	7.6012	-413.127	-207.389	-15.2146	101.182	-136.113	-67.7963	-367.223	77.9408	78.9415	-123.806	-17.0352	64.9764	82.8778	16.064	-34.051	-79.8166	-16.9426	19.7059	-136.699	-4.32263
11.7636	26.8221	-57.8125	18.8146	96.3158	62.7238	-54.5901	108.646	-43.1941	-60.6416	26.0443	157.126	77.4224	-4.44031	2.08032	23.9944	-187.019	-303.162	55.4357	103.209	101.336	-93.5427	-378.854	-93.0576	-96.6165	232.485	-26.3186	-23.5022	7.74646	-413.813	-208.918	-15.6627	101.258	-136.535	-69.5745	-368.458	77.9756	78.1277	-124.739	-15.9429	64.5656	82.7498	15.6844	-34.4714	-78.947	-17.0363	19.8895	-136.492	-4.14966
11.5615	26.5837	-58.3228	18.5638	96.6454	62.1566	-54.6552	108.506	-44.3795	-61.224	25.4939	156.172	76.9423	-4.52466	2.11694	23.9381	-187.91	-303.999	55.2526	102.87	101.057	-94.0769	-379.057	-93.1448	-97.1481	233.178	-26.2303	-23.8884	7.93726	-415.794	-208.845	-16.5923	101.376	-137.032	-70.8365	-369.698	78.0917	76.314	-125.435	-14.363	63.844	83.0121	14.6962	-36.1173	-78.8798	-17.2422	20.8118	-136.095	-3.57703
10.9902	26.6162	-59.1621	17.6426	96.8916	61.5685	-55.1617	108.685	-46.1963	-61.9048	25.0183	155.493	76.3239	-4.55725	2.74561	23.516	-189.227	-304.648	55.2374	102.476	101.121	-95.3315	-379.418	-93.3219	-97.5713	234.441	-26.2734	-24.8229	8.1355	-417.239	-209.358	-17.7666	101.165	-137.712	-71.7238	-370.515	78.2211	74.3995	-126.741	-13.0168	63.4541	84.4481	13.2459	-37.2563	-79.292	-17.4117	21.3099	-135.723	-3.06409
9.93091	26.7546	-60.1671	16.7054	96.9495	60.5688	-55.9227	108.108	-47.4915	-62.3505	24.9224	155.246	75.5876	-4.74109	3.3031	22.9416	-191.347	-305.277	55.1472	101.885	100.541	-96.7786	-379.978	-93.514	-97.8647	234.676	-26.3091	-25.2877	8.08618	-419.296	-210.257	-18.1299	101.036	-138.262	-73.4266	-371.439	78.3781	72.8932	-127.721	-11.5778	63.0977	84.759	12.6361	-37.8167	-80.0778	-17.594	20.7	-135.175	-2.3092
9.65259	28.0172	-61.6801	15.7079	96.5599	59.5784	-57.3135	106.885	-48.2051	-62.6951	24.829	154.574	75.5059	-4.67554	3.68152	22.4202	-192.544	-306.217	54.939	101.27	99.7678	-97.9299	-379.91	-93.5405	-98.2902	234.992	-26.3807	-25.6431	8.54956	-420.439	-211.95	-19.2784	101.169	-138.92	-75.5538	-372.408	78.5894	72.8629	-128.764	-11.2332	62.7352	82.3705	12.2894	-38.0205	-80.2616	-17.7622	19.8733	-134.613	-1.27515
9.5769	28.6464	-62.5551	15.359	96.5642	59.2152	-57.7407	106.497	-48.686	-62.9663	24.7654	153.419	75.8612	-4.53821	5.11328	21.6162	-193.482	-307.179	54.9833	100.842	99.3452	-98.8506	-379.376	-93.6448	-98.5529	235.146	-26.1902	-25.8091	8.86902	-422.835	-213.194	-20.7365	101.24	-139.318	-76.751	-373.718	78.6171	72.5347	-129.944	-10.0952	61.8949	81.9639	11.717	-38.236	-79.9381	-17.8679	19.5579	-134.48	0.233276
9.38709	30.1162	-62.6672	14.9985	96.326	58.5737	-58.4482	106.207	-49.8331	-63.2721	24.8743	152.851	76.2964	-4.51123	6.49829	21.0653	-194.639	-307.298	55.0753	100.584	99.2979	-99.929	-378.561	-93.6382	-98.6934	235.386	-25.9368	-26.1561	8.95532	-424.508	-213.492	-22.328	101.612	-140.096	-77.3743	-375.792	78.4467	71.3546	-130.966	-7.3877	61.1342	82.0261	11.0569	-38.7467	-79.5863	-18.5774	19.4565	-134.341	1.41467
9.00574	30.5844	-63.4449	14.5841	96.1029	57.8312	-58.5326	105.772	-51.3767	-63.4667	25.0084	151.944	76.8295	-4.41064	7.37305	20.1267	-196.427	-307.809	54.3965	100.066	99.0642	-101.243	-377.337	-93.5759	-98.9594	235.654	-25.6808	-26.3705	8.75293	-426.074	-214.086	-23.5087	102.036	-140.5	-79.0305	-377.066	78.3156	69.2039	-132.198	-6.01135	60.3284	83.1096	10.2454	-39.1742	-79.7906	-18.2397	19.585	-134.26	2.22729
7.84265	30.9576	-65.1187	13.8971	95.5404	57.0063	-59.4047	105.564	-53.0283	-63.6594	25.6355	151.19	77.4058	-4.36145	8.26746	19.0913	-197.446	-306.804	54.0596	99.7626	98.744	-103.621	-376.194	-93.9897	-99.1163	235.765	-25.4537	-26.541	8.7804	-427.197	-215.212	-24.2203	102.216	-141.184	-80.7762	-378.076	77.6741	68.2972	-133.011	-5.50781	59.5743	82.8461	9.98328	-39.5177	-79.3599	-18.3311	19.7227	-133.876	1.03406
6.41199	31.1661	-66.4626	13.371	94.8491	56.1238	-60.3889	104.673	-53.8387	-63.7968	26.5088	150.675	79.0295	-4.26953	8.67883	18.2983	-198.675	-304.906	53.4958	99.8597	98.609	-105.813	-375.992	-94.032	-99.234	236.152	-25.5791	-26.7607	8.91187	-428.356	-216.103	-25.3817	102.209	-142.355	-81.425	-379.707	76.2863	67.4271	-133.482	-4.79065	58.2246	82.7742	9.15405	-39.9535	-78.0258	-18.058	20.6163	-133.661	-0.630249
5.8656	31.4248	-67.6051	13.1957	94.6287	55.3815	-61.2906	104.267	-54.623	-64.1987	27.3292	150.049	79.8696	-4.17151	9.23059	17.9082	-200.375	-303.627	53.153	99.5602	98.5553	-105.696	-376.063	-94.2578	-99.1755	236.978	-26.0536	-27.2855	8.95935	-429.845	-215.943	-26.1433	101.903	-143.384	-82.6183	-381.695	75.0763	66.8938	-134.058	-3.46985	57.3407	83.4725	8.67847	-39.8561	-76.4491	-17.2979	21.421	-133.503	-1.14478
5.66748	31.678	-68.1897	13.0463	93.9363	55.1193	-61.8326	103.714	-55.1891	-64.6061	28.3131	149.608	81.2794	-3.85828	10.1226	17.1926	-202.643	-302.959	52.8049	98.8611	98.2637	-106.946	-375.524	-94.6577	-99.1707	237.761	-26.3512	-28.1914	8.96399	-431	-217.562	-27.0304	102.33	-144.205	-83.8955	-383.021	74.5372	65.7777	-134.714	-2.23364	57.078	83.4868	7.66443	-39.8521	-76.2605	-16.6533	21.0879	-133.526	-0.900879
5.31445	32.1997	-68.8109	12.493	92.9181	54.6765	-62.3427	103.527	-56.6414	-64.8828	28.7566	149.298	82.1194	-3.69458	10.7543	16.8778	-203.357	-302.16	52.2078	98.5276	97.7032	-109.132	-375.432	-95.7441	-98.9171	237.89	-26.5208	-28.4657	8.73535	-433.373	-218.127	-27.7977	102.902	-145.484	-84.9073	-384.588	73.0947	64.2777	-135.221	-1.52832	56.3402	84.0013	6.83386	-39.7125	-75.4683	-16.6075	21.3536	-133.607	0.182007
4.78088	32.6896	-69.6757	11.6038	92.1978	54.1349	-63.2456	103.333	-58.0482	-65.1322	29.1426	148.409	82.9742	-3.50989	11.7308	16.8575	-204.071	-300.953	52.0686	98.3838	96.9353	-110.449	-375.237	-96.0265	-98.7411	237.874	-26.6643	-28.9331	8.60327	-434.493	-217.729	-28.606	103.84	-146.185	-85.908	-386.277	71.2146	64.2588	-135.412	-0.976685	54.4794	85.1725	5.61121	-39.6381	-74.5537	-17.542	21.9504	-133.775	1.12
3.91821	32.8417	-70.2535	11.3602	92.0717	53.77	-64.1252	103.012	-59.4305	-65.9143	29.9087	147.775	83.6564	-3.57666	12.2341	17.2715	-205.189	-299.433	51.1842	97.7679	96.0032	-110.923	-375.716	-96.3567	-98.1121	237.934	-26.7952	-29.7269	8.57056	-435.127	-219.215	-29.3486	104.836	-147.869	-87.2382	-388.135	70.4222	63.4238	-136.519	-2.81726	53.1676	84.9404	4.88477	-39.9214	-73.5677	-19.0924	22.2108	-133.738	1.34814
2.38965	32.5448	-70.681	11.0928	91.8444	53.2421	-64.3193	102.831	-61.4622	-67.2533	30.3276	146.796	84.593	-3.64563	13.5331	17.9657	-206.048	-297.885	50.6564	97.41	95.2444	-112.011	-376.691	-96.8257	-97.7834	237.942	-26.6039	-31.0748	8.48889	-435.972	-219.744	-30.3354	105.548	-148.893	-88.2842	-389.711	70.2607	61.8248	-137.414	-3.4845	52.662	83.7537	4.39771	-40.2709	-72.2017	-19.7279	22.7426	-133.874	2.40784
2.02686	32.4446	-71.4548	10.8772	91.2509	52.7168	-65.2491	102.625	-62.2834	-68.3638	30.5636	146.521	85.2874	-4.32568	14.5944	18.7697	-206.924	-298.277	49.0761	96.2852	94.377	-114.294	-377.053	-97.3928	-97.2876	237.954	-26.0098	-32.1346	8.6344	-436.807	-220.483	-30.9603	106.659	-150.968	-89.2736	-390.449	68.8885	61.8198	-137.715	-3.49829	51.3839	81.7672	3.86987	-40.6008	-70.9514	-20.2208	22.2943	-134.318	3.10059
2.1438	32.3861	-71.4818	10.7094	91.1396	51.8114	-65.8718	102.829	-63.7992	-68.9739	30.9575	146.038	86.4885	-4.49292	15.6854	19.4652	-207.556	-298.59	48.0345	95.3021	93.7637	-116.124	-376.975	-98.2708	-96.9734	237.894	-25.5129	-32.8925	8.84058	-437.014	-220.714	-31.7882	107.341	-151.882	-90.03	-392.065	66.8315	61.234	-138.213	-3.50903	51.42	83.2996	2.84326	-40.9718	-69.8137	-20.7203	20.7241	-135.163	4.07056
2.07471	32.1417	-71.9299	10.3438	91.1881	51.448	-66.3175	102.996	-65.3521	-70.2621	32.153	145.426	87.0675	-5.13513	16.5339	19.624	-208.182	-298.748	48.0216	94.8885	92.626	-116.482	-376.83	-98.9714	-96.2394	237.918	-24.9729	-33.7329	8.8634	-437.052	-221.525	-32.9176	107.9	-152.59	-91.5807	-394.554	65.4231	63.1454	-138.564	-3.64734	49.9781	84.7198	1.69165	-41.7595	-69.1213	-21.0143	20.3099	-135.605	3.70886
1.90515	32.1106	-73.2646	10.2478	91.0967	51.1052	-66.1344	102.829	-66.9531	-71.2238	32.7528	144.798	87.6259	-6.18579	17.5184	20.3054	-209.067	-298.972	47.7124	94.1188	91.0538	-116.917	-376.725	-99.449	-95.3806	237.932	-24.9955	-34.3781	8.7113	-437.116	-222.184	-33.5546	108.457	-154.934	-93.2627	-395.939	65.3058	65.4254	-139.006	-3.76428	48.7053	85.2582	1.28625	-42.0431	-67.0332	-21.9838	19.4774	-136.426	2.69568
2.00037	32.1279	-74.0621	10.0916	90.9806	50.9026	-66.6362	102.863	-68.062	-72.168	33.6798	144.804	87.9138	-6.81519	17.6841	21.2428	-210.3	-298.999	47.4695	93.4631	89.5817	-118.429	-376.525	-100.154	-95.0363	237.939	-25.3035	-34.4274	8.70581	-436.996	-223.516	-34.1575	109.288	-156.359	-93.9452	-396.445	64.3383	65.5186	-140.088	-3.86597	46.3293	83.6141	0.947388	-42.4668	-65.3607	-23.0591	17.7483	-137.183	1.01135
2.52429	32.1267	-75.2528	10.172	91.3573	50.3708	-67.3131	102.688	-69.4241	-73.484	34.2782	144.333	88.8204	-7.98315	18.9972	22.0443	-210.868	-299.283	47.1799	93.1403	87.7494	-118.895	-376.878	-100.545	-94.4196	237.952	-25.5461	-34.6906	8.64539	-436.808	-223.682	-34.7952	109.415	-155.701	-94.8118	-397.671	62.9242	66.5863	-140.345	-3.79785	45.0588	82.0027	0.430298	-43.3622	-64.2834	-24.6278	16.9584	-137.287	-0.0975342
3.4386	32.2642	-76.1514	10.3413	91.5271	49.887	-68.3727	102.771	-70.4595	-74.4431	34.5338	143.428	89.7648	-9.29956	20.3922	22.1799	-211.484	-299.366	46.984	92.5398	86.5973	-120.235	-379.03	-101.32	-94.0566	237.902	-25.8427	-35.0406	8.56763	-436.095	-223.838	-36.2517	109.61	-154.233	-94.958	-399.813	62.5414	67.7094	-140.766	-3.87219	44.7952	82.4656	0.142456	-44.5852	-63.045	-24.7263	16.9678	-137.13	-0.525024
4.07959	32.4113	-77.2383	10.433	91.4902	49.5372	-68.8025	102.911	-72.626	-75.9456	34.5886	142.902	90.5265	-10.467	20.7061	21.2002	-212.033	-299.69	46.7141	91.4602	86.3088	-121.693	-380.566	-101.915	-94.1478	237.857	-25.896	-35.8148	8.53809	-434.866	-224.178	-37.3406	110.212	-152.693	-95.7954	-400.875	61.3867	68.6021	-140.847	-3.7583	44.6766	82.4111	-0.391235	-44.9465	-61.5791	-25.0028	16.9742	-136.303	-0.0738525
3.80066	32.64	-79.2031	10.3295	91.4117	49.4489	-69.2104	103.164	-73.6897	-76.8915	34.6039	142.305	91.1014	-11.5122	20.5436	20.8171	-212.584	-299.938	46.6276	90.7346	85.5684	-123.751	-380.919	-102.395	-94.2101	237.949	-26.1239	-36.4885	8.39136	-433.57	-224.626	-37.8937	110.827	-150.814	-97.1207	-402.491	59.6427	69.4786	-141.097	-3.77795	42.752	81.2909	-0.966309	-45.4075	-60.7758	-24.8018	17.0938	-134.85	0.111694
3.35083	32.5857	-80.4395	10.3097	91.1388	48.9786	-69.3583	103.397	-74.6943	-77.928	34.6438	142.027	92.4297	-12.0688	20.1427	20.637	-213.195	-300.959	46.6519	89.9753	84.2523	-125.136	-381.825	-102.993	-94.3024	237.931	-26.067	-36.7562	8.23645	-430.556	-225.312	-38.3934	111.837	-150.578	-98.0923	-403.537	58.5319	69.9232	-140.458	-4.1925	40.8849	81.6571	-1.86169	-46.2308	-60.6293	-25.2632	17.1703	-134.233	0.302002
2.66663	32.4304	-81.381	10.2719	91.1005	48.5771	-69.7887	103.632	-76.1548	-78.9694	34.6992	141.897	93.1783	-13.4897	17.8098	20.6515	-213.999	-302.581	47.2896	89.5129	81.8975	-125.757	-384.369	-103.349	-94.0607	237.938	-25.3118	-37.0404	8.06445	-428.375	-225.959	-39.364	112.366	-150.07	-98.8794	-404.6	57.3813	71.8184	-140.159	-4.24902	40.5864	82.1545	-2.28833	-47.2814	-61.6837	-25.4534	17.2604	-134.329	0.303955
2.5874	32.3168	-82.1396	10.2509	90.8478	47.703	-70.2067	104.049	-77.3789	-80.3068	34.7313	141.72	94.3375	-14.9045	16.5704	20.4808	-214.71	-302.93	48.0422	87.8607	80.9535	-126.071	-385.669	-104.339	-94.1335	237.946	-24.8308	-37.3163	8.03809	-427.136	-226.525	-41.2947	112.903	-149.059	-99.1257	-404.855	56.623	73.337	-139.812	-4.31201	39.4219	80.9331	-2.49304	-47.3396	-61.8844	-25.3005	16.9908	-135.264	0.0561523
2.375	32.2023	-83.4191	10.4951	90.7349	46.9843	-70.6963	104.551	-78.3999	-80.7988	34.8466	141.692	95.8597	-15.7104	15.3809	20.462	-215.755	-303.631	48.2024	87.1346	80.2086	-127.394	-385.972	-104.621	-94.0956	237.93	-24.3615	-38.4968	7.86926	-426.216	-227.044	-42.1183	113.123	-147.804	-99.4534	-404.77	55.259	73.027	-139.421	-4.19348	37.7219	80.6161	-2.85925	-47.6808	-63.231	-25.4053	16.5773	-135.715	-0.817871
1.74988	32.225	-84.3665	10.2361	90.4916	46.6305	-70.6923	105.157	-78.8313	-81.5563	35.0551	141.503	96.9584	-16.6414	13.9547	20.3842	-217	-305.392	48.8082	86.7102	79.5968	-129.639	-387.065	-105.135	-94.1677	237.927	-24.5482	-38.9973	7.95764	-425.09	-227.904	-43.0458	113.293	-147.054	-100.48	-405.28	54.8762	73.1876	-139.443	-3.86743	36.7178	79.7521	-3.84265	-47.9581	-66.2656	-25.7416	15.2811	-135.399	-1.87793
1.48145	32.3441	-85.5809	10.2653	90.1296	46.5326	-70.3751	106	-79.9802	-82.3115	35.5968	141.443	97.6422	-17.7543	13.0365	20.4337	-217.977	-306.321	49.2404	86.0864	79.21	-130.458	-389.726	-105.263	-94.7957	237.94	-24.358	-39.9108	8.04431	-424.304	-228.826	-44.0953	113.22	-147.042	-100.917	-406.101	53.5737	73.2483	-139.683	-3.65698	36.067	79.4443	-3.73291	-48.3655	-67.2659	-25.8417	14.3254	-134.258	-1.4198
0.975342	32.469	-87.0554	10.2007	89.6992	46.0049	-70.0549	106.477	-80.7317	-82.9059	36.183	141.5	98.7815	-18.8995	12.4745	20.0292	-218.647	-307.205	49.3192	85.6436	77.656	-130.857	-390.56	-105.239	-95.1498	237.963	-24.5229	-40.2631	8.34473	-424.044	-230.269	-44.6602	113.827	-146.828	-101.585	-406.724	51.5095	73.4847	-139.827	-3.24451	35.7295	78.9927	-4.17334	-49.0758	-68.3231	-26.2653	13.7245	-134.112	-2.12891
0.764648	32.4838	-88.5156	9.60278	89.4998	45.5399	-69.542	107.556	-81.9563	-83.2997	36.5347	141.689	99.9324	-19.7968	12.3606	19.6049	-219.386	-308.55	49.4161	84.6632	77.2279	-131.433	-391.527	-104.895	-95.4397	237.95	-24.8956	-40.3066	8.62354	-423.989	-231.673	-46.3794	114.565	-146.772	-102.344	-406.832	51.1089	73.4493	-139.964	-3.13513	35.3761	78.1437	-4.41614	-49.1455	-68.5565	-26.4945	13.1372	-134.088	-3.0647
0.21582	32.673	-89.7855	9.24353	89.0989	45.2379	-69.3352	108.519	-83.3724	-83.7717	37.2611	141.899	100.792	-20.7053	11.9166	18.6935	-219.984	-311.278	49.3672	83.7872	76.8088	-133.105	-393.5	-104.54	-95.8166	237.949	-24.967	-40.5759	8.80835	-424.013	-231.943	-47.5829	114.978	-146.619	-103.091	-407.318	50.3042	73.6382	-140.093	-2.94043	35.0591	77.1697	-5.39148	-49.7107	-69.0571	-27.0948	12.1801	-134.21	-3.66675
-0.18042	33.0277	-90.207	9.13745	88.4336	44.9614	-68.5549	109.186	-83.8718	-84.3335	37.984	142.334	101.284	-21.6779	10.7892	18.0543	-221.041	-312.316	49.3444	82.6842	76.2837	-135.231	-395.798	-104.271	-97.3166	237.935	-24.9674	-40.7273	9.31055	-424.7	-233.016	-48.3739	115.371	-146.435	-104.162	-407.636	48.666	75.1636	-139.868	-2.60413	33.8877	77.3884	-5.93762	-50.3466	-70.0695	-28.313	10.8903	-133.996	-3.45203
-0.653442	33.2714	-90.4714	8.81433	87.7909	44.5328	-68.3212	111.104	-84.7432	-84.5287	39.0209	142.682	101.607	-23.4016	10.0068	17.0087	-221.808	-312.744	49.183	81.9442	75.9675	-135.364	-396.421	-104.315	-97.6088	237.928	-24.9578	-41.1548	9.80273	-425.843	-234.041	-49.1669	115.714	-145.494	-105.325	-407.771	47.0714	76.4913	-140.243	-2.36316	32.9771	77.4445	-6.41931	-50.9408	-69.8234	-29.3225	9.70789	-134.111	-3.50024
-0.725586	33.4045	-91.2612	8.88049	87.3239	44.0773	-68.1963	112.205	-85.8894	-84.9098	40.0311	143.119	102.391	-24.6967	9.28003	16.5906	-223.248	-314.197	48.9653	80.8606	75.7141	-135.34	-397.23	-104.527	-97.9406	237.963	-24.9508	-41.5945	9.95752	-426.543	-235.658	-50.0845	116.085	-144.178	-106.416	-407.716	45.8259	77.1697	-140.315	-2.56836	32.4254	78.0685	-6.49658	-51.6642	-69.7135	-30.553	9.28101	-133.977	-4.25879
-0.0198975	33.058	-91.9841	9.80066	86.8685	43.6665	-68.2904	113.433	-87.4865	-85.1375	40.3956	143.368	103.618	-25.0853	9.19739	15.4668	-225.276	-315.614	48.7695	79.9646	74.7522	-135.166	-398.092	-104.761	-98.7993	237.89	-24.9497	-41.9208	10.377	-427.986	-236.508	-51.9797	116.357	-142.907	-108.003	-407.693	45.319	77.2156	-140.696	-2.59387	31.735	77.9631	-6.6759	-52.2742	-69.7729	-31.4067	9.36218	-134.122	-5.07495
0.234863	32.7145	-93.3118	10.8015	86.5624	43.2739	-68.6608	114.548	-88.699	-84.912	40.9247	144.018	104.704	-25.8236	9.23828	14.165	-227.082	-317.21	48.6664	78.7324	74.2595	-135.072	-399.472	-104.826	-99.4984	237.895	-24.9683	-42.6177	10.9253	-429.463	-237.331	-52.5677	116.746	-140.668	-109.476	-407.863	44.4784	78.7646	-140.846	-2.57214	31.4037	78.2443	-6.6676	-52.7111	-69.8495	-32.8762	10.0514	-133.338	-4.96838
0.514282	32.5487	-94.6814	11.4382	86.1401	42.4526	-68.5354	114.903	-89.2618	-84.8672	41.476	144.718	105.522	-27.2606	9.17541	13.5237	-227.481	-318.666	48.1461	77.4323	73.6907	-135.499	-400.993	-105.095	-100.87	237.953	-24.9515	-42.9628	11.6831	-431.372	-238.693	-54.1755	117.661	-139.06	-110.449	-408.214	43.3147	80.6598	-141.045	-2.25183	31.3276	78.7747	-6.50403	-54.0642	-70.614	-33.5789	10.4225	-132.271	-3.77356
0.557373	32.7334	-95.7279	11.7144	86.6592	41.6897	-68.4856	116.834	-89.9316	-84.375	42.571	145.896	106.429	-28.2175	9.16235	12.3502	-229.269	-319.534	48.3314	77.1469	73.0358	-136.464	-401.472	-105.387	-101.385	237.973	-24.9502	-42.7372	12.072	-433.32	-240.029	-54.954	118.241	-138.129	-111.226	-408.742	42.234	81.8571	-141.394	-1.4552	31.2719	79.2117	-6.52942	-56.1334	-71.9866	-34.5133	9.93384	-130.924	-1.83716
0.586182	33.2395	-96.5847	12.187	86.708	41.41	-68.3489	117.655	-90.7129	-83.8036	43.9108	146.517	107.893	-28.8403	9.10254	11.7727	-230.63	-320.563	48.9257	75.4219	72.1515	-137.002	-402.705	-105.417	-102.04	237.953	-24.9561	-42.5609	12.4948	-433.839	-241.104	-57.1609	118.897	-136.889	-113.125	-409.518	41.8618	82.3876	-142.109	-1.17871	31.3362	79.6299	-6.4491	-56.9086	-73.3608	-35.8516	9.20239	-128.582	-0.851562
0.415039	33.6967	-96.9861	12.5016	86.3779	40.8492	-68.2783	118.392	-92.1135	-83.501	45.0206	146.998	109.583	-29.7979	8.92224	11.1752	-231.54	-321.413	49.8622	74.755	71.2477	-138.429	-403.865	-105.556	-102.559	237.963	-24.9529	-42.2474	12.6779	-434.836	-241.631	-57.9711	119.257	-135.464	-114.56	-410.327	40.7612	83.401	-142.778	-0.943604	31.8881	80.672	-6.23425	-57.7157	-75.6671	-37.1117	8.8175	-127.796	0.478394
0.568481	33.6882	-97.9573	12.5863	86.2175	40.6293	-68.3042	120.045	-93.9314	-83.3649	45.8586	147.111	110.317	-31.2228	8.56458	10.606	-232.797	-323.612	50.3568	73.4279	71.033	-138.957	-404.747	-105.658	-102.837	237.956	-24.959	-42.1559	12.8778	-435.865	-242.96	-58.7886	119.136	-134.628	-115.413	-411.446	39.8208	84.8278	-143.196	-0.513306	33.2244	80.8689	-5.72253	-58.1001	-76.5398	-37.4353	8.63452	-126.704	1.47192
0.574341	33.7069	-99.3989	12.5928	86.0475	40.369	-68.3054	120.742	-94.668	-83.4802	47.3333	147.424	111.514	-32.2375	7.63721	10.3113	-234.837	-324.802	51.021	72.9156	70.4579	-139.061	-405.387	-105.939	-103.37	237.969	-24.9753	-42.2332	13.5651	-437.184	-244.44	-59.6803	118.731	-133.855	-116.329	-411.918	37.9547	85.7922	-143.596	-0.196045	34.0074	80.2837	-4.36304	-58.4729	-79.0863	-38.5024	7.92114	-125.154	2.17834
0.576538	33.9417	-100.484	12.649	85.9814	39.9431	-68.2772	121.703	-95.5801	-83.5503	48.5597	147.954	112.901	-32.7814	6.86816	9.78162	-235.924	-325.461	52.0564	71.6265	69.3466	-139.367	-406.463	-106.12	-103.707	237.915	-24.9696	-42.46	13.7289	-439.028	-245.728	-59.9994	119.587	-132.75	-117.649	-412.538	36.4742	86.0037	-144.44	-0.0869141	34.6353	80.1393	-3.97693	-59.2217	-79.9296	-39.3975	7.14246	-124.032	2.51318
0.5802	34.0317	-101.427	12.7972	86.1494	39.7302	-68.0791	122.166	-96.422	-83.5912	48.9697	148.847	114.299	-33.2417	6.04272	9.45923	-236.005	-327.323	53.6774	69.9268	68.7966	-139.686	-407.325	-106.541	-104.696	237.959	-24.9606	-42.8099	13.6528	-440.362	-246.176	-60.681	120.572	-131.671	-118.877	-412.762	35.3925	86.2175	-145.311	-0.0404053	35.2056	78.8762	-3.15869	-59.9299	-81.6321	-40.1185	7.11536	-123.153	2.43481
0.528564	34.1636	-102.118	12.9375	86.5016	39.5469	-67.9309	122.357	-98.2524	-84.0425	49.4432	149.191	115.028	-33.6962	4.9707	9.48474	-236.991	-328.843	53.8689	69.8616	68.2188	-139.795	-408.481	-106.853	-105.464	237.871	-24.9611	-43.1671	13.8522	-440.68	-247.314	-61.2618	121.454	-130.331	-119.808	-413.175	34.9712	86.2656	-146.614	0.246094	35.4312	77.8943	-2.19128	-60.344	-82.7538	-40.9049	6.66907	-121.838	2.47205
0.409668	34.2244	-102.928	12.9878	86.8801	39.2321	-67.8877	123.209	-99.6393	-84.3768	50.806	150.255	115.983	-34.7644	3.75708	9.1593	-238.404	-330.431	55.1888	68.436	67.1289	-139.907	-409.978	-106.593	-106.074	237.868	-24.9674	-43.6665	14.3804	-441.834	-247.707	-61.5139	122.072	-129.442	-120.886	-413.355	33.6211	86.1492	-147.325	0.682983	35.7992	77.3026	-1.08472	-62.5123	-84.5079	-40.7679	6.00244	-120.642	2.49084
0.118408	34.1753	-104.693	12.9075	86.942	39.136	-67.9683	124.77	-100.697	-84.621	51.6827	150.942	116.942	-35.8662	3.02991	8.82471	-240.747	-331.09	56.0502	67.9873	66.2344	-140.1	-412.241	-106.287	-106.586	237.427	-24.9789	-43.9891	14.4822	-443.276	-249.132	-62.0988	122.512	-127.845	-121.909	-413.553	32.2352	86.5056	-147.69	0.939819	36.0077	77.7949	-0.291382	-63.6311	-86.0629	-42.3196	5.26318	-119.773	2.66174
-0.266602	33.947	-105.432	12.8356	87.5266	38.8309	-68.1454	125.739	-101.815	-84.762	52.2208	151.282	117.364	-37.2532	2.50366	8.68958	-240.649	-332.716	56.6283	65.9122	65.7303	-140.878	-413.048	-106.059	-107.274	237.383	-24.9771	-44.3425	14.5385	-445.582	-250.307	-62.7202	122.875	-126.009	-122.646	-413.694	31.2524	87.2119	-147.705	0.966797	36.3273	78.8801	-0.0164795	-64.6522	-87.8105	-43.0234	4.63403	-119.194	2.59839
-0.488037	33.4381	-107.099	12.8936	87.9319	38.4836	-68.1595	126.512	-103.652	-84.917	52.6942	151.687	118.216	-37.7576	2.00793	8.36853	-241.356	-333.937	57.9327	64.8326	64.2798	-141.286	-413.372	-105.734	-108.823	237.311	-24.9607	-44.7612	14.5609	-447.223	-251.372	-63.4156	122.966	-125.657	-123.325	-413.305	30.7806	87.136	-147.673	1.15161	36.6797	79.5858	-0.144531	-64.9585	-88.7595	-43.6569	4.33105	-117.843	2.53845
-0.96936	33.2379	-107.857	13.0116	88.2889	38.2463	-67.9415	127.028	-105.239	-85.1899	53.446	152.425	118.821	-38.3108	1.82092	8.43408	-242.511	-335.109	58.1827	64.4445	63.895	-141.937	-414.382	-105.714	-110.456	237.357	-24.946	-45.4099	14.296	-448.162	-252.335	-64.1349	123.037	-125.306	-123.688	-413.224	30.5234	87.9326	-147.751	1.36853	36.7468	80.1144	-0.173096	-65.9486	-89.8242	-45.4166	4.25916	-116.151	2.39563
-1.05396	33.2319	-109.916	12.9609	88.5964	38.131	-67.9266	127.806	-105.894	-85.3225	54.1566	152.932	119.617	-39.0632	0.142456	8.57446	-244.874	-335.64	58.7168	63.8365	63.1617	-143.24	-415.796	-105.621	-111.258	237.062	-24.9038	-45.6511	14.116	-450.016	-252.542	-64.4376	123.441	-125.046	-123.915	-412.51	30.0254	88.6249	-148.112	1.26953	36.7141	79.5258	-0.336914	-67.2113	-91.4612	-45.4556	4.11084	-115.466	2.62109
-1.40356	33.3341	-111.531	13.4281	89.006	38.0336	-67.7821	129.115	-106.756	-85.6783	54.9608	153.174	120.306	-39.7969	-0.760132	8.6886	-245.614	-336.375	59.1501	62.9523	62.8451	-143.794	-415.367	-105.512	-110.848	236.623	-24.9144	-46.0356	13.761	-451.539	-254.563	-64.824	123.971	-124.938	-123.866	-411.76	28.6748	88.8318	-148.323	1.58606	36.6152	79.6779	-0.403198	-69.4264	-94.0349	-43.3219	5.23962	-114.625	2.72388
-1.76794	33.5073	-112.645	13.9611	89.7336	37.9167	-67.847	130.909	-107.937	-86.2771	55.3571	153.66	121.037	-40.2072	-1.38464	8.77551	-246.555	-336.489	59.8733	61.7352	62.4396	-144.391	-413.941	-105.172	-111.341	235.481	-24.8748	-46.1979	13.5023	-453.64	-255.285	-65.2253	124.236	-124.963	-123.767	-410.865	26.9772	90.5599	-148.657	1.82202	36.9613	80.0024	-0.594238	-69.9136	-94.0183	-42.3862	6.40906	-113.993	3.16089
-2.36377	33.6962	-113.054	14.5579	90.3813	37.7533	-68.104	131.368	-109.369	-86.5851	55.7552	153.739	121.952	-40.8062	-2.45142	8.89966	-247.811	-336.028	60.0387	60.8886	62.2683	-145.01	-412.598	-105.173	-114.074	233.918	-25.1824	-46.5024	13.1278	-454.321	-256.689	-64.8282	124.443	-125.186	-123.641	-410.594	25.1796	90.8612	-149.171	2.09644	37.4742	79.9564	-0.56897	-70.1243	-94.8146	-42.9719	7.45544	-112.793	3.72595
-2.71155	33.7083	-113.724	14.9536	90.8217	37.6069	-68.1877	131.828	-110.212	-86.994	56.1643	153.759	123.111	-41.084	-2.74512	9.08972	-249.516	-335.023	60.4968	59.9626	61.9059	-146.132	-411.321	-105.108	-116.014	232.449	-25.9746	-46.8931	13.1552	-455.514	-257.905	-64.4478	124.646	-125.386	-123.656	-410.707	23.7189	91.0707	-149.783	2.68433	39.6008	80.182	-0.541382	-68.775	-96.4774	-43.3696	7.63635	-111.308	3.8186
-3.28467	33.6742	-114.043	15.5867	91.7091	37.575	-68.326	132.302	-110.717	-87.416	56.7543	153.933	123.871	-41.6381	-3.34058	9.38916	-250.438	-333.071	60.4995	59.5326	62.0623	-146.822	-409.758	-105.211	-116.569	231.769	-26.6692	-47.431	12.6144	-456.592	-257.605	-63.6327	124.89	-125.717	-123.609	-410.811	22.0455	91.4023	-150.58	2.84265	40.2299	80.2544	-0.18811	-66.3037	-99.2319	-43.5522	8.42773	-110.106	4.05737
-3.55176	33.5834	-114.62	16.177	92.5725	37.5334	-68.6082	133.12	-111.72	-87.7366	57.6708	154.08	124.235	-42.7786	-4.19385	9.83728	-251.35	-331.036	60.441	58.6819	62.4021	-147.76	-409.557	-105.361	-116.719	230.73	-26.8036	-48.27	12.3921	-459.045	-257.871	-63.1466	125.595	-126.766	-123.624	-410.85	20.8657	91.5021	-151.803	3.25122	40.7523	80.2496	-0.0212402	-65.2297	-100.077	-43.5674	8.98535	-109.133	4.27722
-4.14905	33.2949	-114.991	17.1991	93.0997	37.5325	-68.8274	134.501	-113.07	-87.7509	58.3506	154.117	124.888	-44.0449	-4.85596	10.6804	-253.068	-330.514	60.4235	57.8231	62.8209	-148.532	-408.94	-105.713	-117.689	229.928	-26.9003	-49.3706	12.3665	-460.139	-258.725	-62.7323	126.155	-127.93	-123.322	-411.035	19.6031	90.8514	-152.816	3.60901	41.3157	80.4241	0.168213	-63.6377	-100.645	-43.5122	9.12305	-108.632	4.23376
-4.75757	33.0658	-115.191	18.261	93.63	37.4054	-69.4227	135.152	-113.634	-87.8701	59.4991	154.233	125.314	-45.0897	-5.40735	11.5674	-255.24	-329.866	60.665	56.7407	63.5155	-149.37	-408.093	-106.092	-119.139	229.207	-26.6913	-49.7386	11.6008	-460.69	-258.231	-62.3213	126.276	-128.943	-123.084	-411.534	18.9727	89.8035	-152.53	3.81995	42.7024	80.2944	0.595093	-62.4401	-101.157	-43.5365	8.84277	-108.035	4.05933
-5.16919	32.6656	-115.269	18.7832	94.3224	37.4213	-70.1305	135.346	-113.62	-88.1881	60.6815	154.226	125.555	-45.7142	-5.68347	12.5175	-256.609	-328.453	60.7832	55.5302	63.42	-150.341	-408.316	-106.032	-120.174	228.6	-26.6331	-49.8889	10.5361	-463.076	-258.131	-61.7723	126.374	-130.141	-122.797	-411.797	18.4771	87.9475	-151.724	4.01819	43.4845	80.1337	0.988403	-62.0841	-102.442	-41.9668	8.70691	-107.656	3.64319
-5.50232	31.881	-115.35	19.1096	94.8254	37.3481	-70.7722	136.271	-113.493	-88.1056	62.0653	154.212	125.885	-46.3723	-6.36914	13.2299	-256.895	-327.488	60.9108	54.8724	62.79	-152.476	-408.571	-106.014	-120.192	228.108	-26.6169	-51.0592	9.77563	-464.891	-258.104	-61.181	127.027	-131.298	-122.346	-411.662	17.7797	86.537	-152.085	4.17859	44.229	79.4431	1.41199	-60.3145	-103.633	-41.2709	8.46643	-106.829	3.26526
-6.05762	31.1742	-115.401	19.7394	95.3441	37.2728	-71.1373	137.184	-112.321	-87.858	63.2566	154.154	126.425	-47.1288	-6.60583	15.2976	-257.761	-326.446	61.1786	54.22	63.0863	-153.576	-408.622	-106.147	-120.632	227.155	-26.469	-51.9154	9.18396	-465.645	-257.423	-60.678	127.745	-132.709	-122.218	-411.328	16.9213	86.188	-152.756	4.51062	44.8296	79.2417	1.84631	-60.3789	-104.089	-39.4851	8.9126	-106.016	2.91528
-6.34607	30.9304	-115.412	20.2754	95.4015	37.1968	-72.2379	138.753	-110.821	-87.9857	63.7443	154.16	127.32	-47.9888	-6.8678	16.7463	-258.438	-325.862	61.1918	53.1118	64.1805	-153.661	-408.492	-105.794	-121.3	226.87	-26.2267	-53.1925	9.00269	-466.108	-256.167	-59.8441	127.659	-133.285	-122.157	-411.01	16.2751	86.1718	-152.75	4.66711	46.7201	79.1252	1.32141	-60.4977	-104.883	-38.0276	9.38123	-104.75	2.49744
-7.88782	31.8176	-115.407	20.7223	95.3214	37.1422	-73.1942	140.109	-109.887	-87.8622	64.809	154.102	128.208	-48.5115	-7.30566	17.0181	-259.787	-325.8	61.2783	52.3159	64.9901	-154.419	-408.309	-105.339	-122.665	226.67	-26.1121	-54.1416	8.85547	-466.932	-255.396	-59.8785	128.524	-134.764	-122.201	-410.441	15.6217	86.2146	-152.889	4.85852	48.7151	78.9906	0.419067	-60.3817	-105.064	-36.0244	10.9359	-104.182	2.03333
-8.88062	32.286	-115.257	21.3198	95.3489	37.6266	-74.0731	140.887	-109.722	-87.593	66.0414	154.172	128.976	-49.0769	-7.69971	17.6019	-260.145	-325.732	61.3407	51.2581	65.6421	-156.071	-408	-104.265	-124.635	226.339	-26.0575	-54.8712	8.32434	-467.833	-254.104	-59.5876	129.421	-136.208	-122.457	-410.106	14.9221	86.2051	-153.057	4.86475	49.2585	79.0059	-0.422607	-60.5577	-105.454	-34.459	11.9496	-103.678	1.57629
-9.47498	32.1602	-115.01	21.8547	95.6383	38.1765	-75.3317	141.461	-109.849	-87.1899	66.9495	154.101	129.661	-49.8688	-7.72363	17.9205	-260.2	-325.289	61.4355	50.3483	66.1543	-158.476	-407.352	-103.32	-125.301	226.18	-26.1073	-55.0198	7.3479	-467.68	-253.288	-59.1968	129.696	-137.632	-122.974	-410.017	14.6433	86.1021	-152.382	5.1366	49.3379	79.0626	-1.26746	-60.3492	-105.666	-33.1483	12.2734	-103.122	1.35498
-11.7004	31.6525	-114.457	23.0851	96.0128	38.3567	-75.9371	142.031	-109.703	-87.0328	67.8732	154.192	129.912	-51.0374	-7.77625	18.6407	-260.335	-325.494	61.4591	49.7113	66.8748	-159.272	-406.594	-102.922	-125.971	226.093	-26.2958	-56.3906	6.76245	-467.19	-252.524	-58.8	129.976	-138.16	-123.326	-410.123	14.2675	86.3145	-152.311	5.47412	49.957	78.6869	-1.97913	-60.1572	-105.913	-32.8192	13.1029	-102.278	1.21082
-12.0618	31.2832	-113.162	24.4811	96.2737	38.2791	-77.2501	142.52	-109.693	-86.9349	68.5531	153.821	130.879	-51.8502	-7.68176	19.0825	-259.798	-325.736	61.7531	49.0466	67.3097	-159.47	-406.286	-102.529	-126.621	225.857	-26.4359	-57.3241	6.31848	-466.793	-251.414	-57.84	130.638	-139.556	-124.021	-409.884	14.1848	86.3914	-151.666	5.82788	52.6515	78.7273	-2.79858	-59.6033	-106.236	-32.9094	13.877	-101.618	0.7854
-13.0227	31.0065	-112.093	24.8711	96.1643	38.7821	-77.676	143.273	-109.759	-87.0271	68.9438	153.384	130.954	-52.4642	-7.54065	19.8651	-258.119	-325.874	62.3774	48.6198	68.0352	-159.823	-405.648	-102.116	-126.252	225.729	-26.7782	-58.6278	6.06812	-467.135	-250.127	-57.8799	130.92	-140.912	-124.834	-409.733	14.2208	86.6193	-150.629	6.30542	54.0669	78.7102	-2.60034	-59.1144	-105.781	-33.3551	15.7057	-100.7	0.976318
-14.4944	30.748	-111.248	25.2603	96.627	39.5243	-77.9913	144.296	-109.899	-86.9148	68.8038	152.931	130.828	-53.2726	-7.3905	21.2903	-256.603	-326.047	62.8728	47.2833	68.8519	-160.959	-405.222	-101.439	-126.319	225.38	-27.3923	-59.3044	6.53467	-467.447	-249.083	-57.8815	131.195	-141.64	-125.459	-409.366	14.9611	86.0333	-149.469	7.03796	53.9434	78.2883	-2.75452	-58.7087	-105.623	-34.3428	17.4072	-99.9857	0.984619
-15.642	30.3217	-110.559	25.89	96.8709	40.0015	-78.6094	145.263	-109.586	-86.8431	68.6198	152.622	130.441	-54.2067	-7.22473	21.5533	-255.432	-326.593	63.2817	45.5349	69.4038	-162.604	-405.006	-100.713	-126.073	225.346	-27.9122	-59.5369	7.2793	-467.825	-249.237	-57.725	131.765	-142.499	-125.474	-409.3	15.1873	85.8591	-147.873	7.99158	54.3087	78.2863	-2.90686	-56.8345	-105.474	-33.9526	17.874	-99.5375	1.23938
-16.5297	29.7365	-110.477	26.2195	97.2327	40.3137	-79.3744	145.92	-109.029	-86.9159	68.317	151.607	130.242	-55.1118	-7.30383	21.9824	-254.639	-327.458	63.9456	44.8899	69.6583	-163.906	-404.788	-100.426	-126.651	225.408	-28.6912	-60.3151	8.66028	-468.494	-249.69	-57.3156	132.07	-143.501	-125.759	-409.244	15.8279	85.4037	-146.702	8.36243	55.1271	78.7454	-3.07935	-56.3772	-105.195	-33.7604	18.2931	-98.7675	1.44348
-17.0261	28.8661	-110.39	26.9709	97.3894	40.9775	-80.2778	146.344	-108.605	-87.2311	67.9025	151.255	129.841	-55.838	-7.34717	22.3558	-254.866	-327.981	64.2174	44.7206	70.0771	-164.496	-405.102	-100.122	-126.743	225.17	-29.3049	-61.4978	9.55078	-468.789	-249.99	-56.7156	132.401	-145.198	-125.966	-409.269	15.864	85.2146	-146.616	8.10632	55.7599	79.155	-3.30981	-55.0258	-105.116	-33.2117	18.7843	-98.3623	1.55994
-17.7162	28.267	-110.57	27.939	97.5007	41.4954	-80.8494	146.785	-108.251	-87.332	67.2158	150.798	129.785	-56.5892	-7.56812	22.9775	-255.038	-329.053	64.4847	43.7622	70.4291	-165.118	-405.766	-99.5378	-127.16	224.804	-30.3104	-62.0643	10.481	-469.082	-250.195	-55.7257	132.574	-146.221	-125.946	-409.392	15.8549	84.9351	-146.049	7.96252	56.9517	79.5721	-3.33789	-53.7396	-105.133	-32.9407	18.5946	-98.0977	0.91748
-18.4175	27.6508	-111.606	28.5641	98.7832	42.1539	-81.1716	147.459	-108.719	-87.4111	66.2612	150.222	129.724	-57.2722	-8.04236	23.0648	-255.268	-329.863	64.7537	42.8834	71.1156	-166.245	-406.301	-98.8357	-127.991	224.078	-31.342	-62.4611	10.7611	-469.171	-250.161	-55.8713	132.79	-147.197	-125.641	-409.281	15.7976	84.4381	-145.668	7.71106	58.9214	79.5148	-3.43848	-52.342	-105.209	-32.4335	17.5757	-97.1816	0.158203
-18.9464	27.4137	-113.154	29.2334	99.2145	43.0935	-81.7466	147.915	-109.083	-87.4132	65.1171	149.945	129.501	-57.7256	-8.2384	23.2402	-255.252	-330.09	65.021	41.8158	71.6564	-168.08	-407.715	-98.2278	-128.98	223.637	-32.3495	-63.228	10.678	-469.381	-250.106	-55.8394	133.236	-148.138	-124.99	-409.173	15.8622	84.1349	-145.618	7.59204	59.3424	78.7686	-3.34167	-51.2194	-105.259	-31.8702	16.5736	-96.3129	0.5448
-19.2172	27.2589	-114.731	29.9779	99.641	43.3531	-81.9972	148.402	-109.603	-87.4199	64.4192	149.768	128.946	-58.3481	-8.66382	23.3674	-255.299	-331.014	64.9744	40.1693	72.3374	-169.22	-410.372	-97.4373	-129.599	223.058	-32.7025	-63.4495	10.6876	-469.644	-250.055	-55.681	133.647	-150.266	-124.354	-409.184	16.952	83.4714	-145.294	7.79907	60.4071	78.1711	-3.44189	-49.7943	-105.165	-30.3917	15.7184	-95.7377	0.55249
-18.9523	27.1489	-115.233	30.6104	99.6914	44.1874	-82.7261	148.599	-109.633	-87.3813	63.6021	149.518	128.253	-59.1609	-9.06812	23.5079	-255.312	-331.398	65.1425	39.6377	72.9653	-169.934	-410.805	-96.3602	-130.06	222.716	-33.1106	-64.3698	10.6686	-469.886	-250.165	-55.594	134.172	-151.659	-123.121	-409.258	17.328	83.3206	-144.947	7.86975	60.6396	78.0197	-3.6189	-48.6447	-105.129	-29.0187	14.3716	-95.3595	0.172729
-18.9816	26.6366	-115.543	31.4545	99.3363	44.4976	-83.6266	148.762	-109.644	-87.3795	62.548	149.408	127.277	-59.7175	-9.56104	23.6455	-255.274	-331.826	65.2988	39.2119	73.4773	-171.009	-411.138	-95.4983	-130.633	222.536	-34.0498	-65.0139	10.6318	-470.164	-250.203	-55.7694	134.344	-152.08	-122.465	-409.516	18.785	83.1443	-144.896	8.01929	60.9962	77.7794	-3.896	-47.064	-104.819	-27.3235	12.8613	-94.954	0.365967
-19.1086	26.0604	-115.84	32.2797	99.1406	44.9062	-83.8184	148.959	-109.756	-87.4833	61.8477	149.228	126.384	-60.3423	-9.73633	23.615	-255.49	-332.706	65.3641	37.6598	74.3113	-172.998	-411.92	-95.1083	-130.742	222.38	-35.0457	-66.186	10.6989	-470.425	-250.346	-55.8828	134.021	-152.593	-121.232	-409.613	20.4257	82.9755	-144.975	8.15613	62.8018	77.991	-4.1731	-46.2976	-105.143	-26.5596	12.869	-95.0516	1.24304
-18.9653	25.3945	-115.802	33.0721	99.0704	45.3595	-84.1912	149.441	-109.759	-87.5338	61.474	148.919	125.702	-61.0098	-10.3821	23.9199	-255.117	-333.453	65.4219	36.3296	75.7461	-174.705	-413.875	-94.0537	-131.271	222.255	-35.618	-66.7911	10.7971	-470.903	-250.542	-56.2677	134.283	-154.322	-120.018	-409.344	21.6209	82.7534	-144.885	8.48389	64.6235	78.1895	-4.34875	-45.9637	-105.383	-25.5028	12.9449	-95.2327	2.50354
-18.7054	24.8589	-115.457	33.6178	99.0533	45.5082	-84.8033	149.766	-109.868	-87.5889	60.5784	148.598	124.621	-61.797	-10.7725	24.3701	-254.975	-334.475	65.2419	35.7625	77.3066	-175.4	-415.244	-93.2188	-131.924	222.352	-36.3091	-67.6367	11.2174	-471.878	-250.742	-56.5636	134.294	-156.48	-119.852	-409.341	22.2467	82.652	-144.746	8.55688	65.4961	78.8082	-4.55176	-44.6433	-105.964	-24.2933	12.9291	-95.6617	3.25708
-18.2128	24.1879	-115.336	34.4301	98.635	45.7988	-85.4053	150.155	-110.74	-87.6044	59.7355	148.309	124.013	-62.6875	-11.4397	24.6315	-254.67	-335.489	65.3405	34.8367	78.7805	-176.076	-415.62	-92.3533	-132.553	222.346	-37.0912	-69.5413	11.5468	-472.777	-250.955	-56.6879	134.466	-157.236	-119.079	-409.392	22.8759	82.5994	-144.733	8.68518	66.3376	79.1434	-4.81824	-42.0062	-106.594	-23.6763	13.0547	-95.9927	4.28772
-17.5032	23.5635	-115.468	35.394	97.4927	46.4725	-86.2198	150.388	-111.414	-87.783	59.0902	148.452	123.321	-62.9153	-11.5243	25.2955	-254.446	-336.539	65.6422	34.3334	80.1743	-178.061	-415.871	-90.99	-132.766	222.401	-37.4395	-71.1825	12.0372	-473.51	-251.21	-56.8402	134.521	-157.931	-118.316	-409.625	23.4255	82.8757	-144.84	8.31458	66.6182	78.8239	-5.03247	-41.4794	-107.06	-24.2133	13.3142	-96.6909	5.02185
-17.1453	22.6862	-115.692	36.0905	96.8709	46.5272	-86.6168	150.683	-112.379	-87.8185	58.4397	148.436	123.003	-63.1747	-11.4382	25.4556	-254.112	-337.439	66.0319	33.5166	80.4899	-180.103	-416.761	-90.3894	-133.031	222.323	-38.7388	-72.2155	12.9125	-474.138	-251.823	-57.2727	135.243	-158.566	-117.453	-409.688	24.4669	83.1573	-145.016	8.2522	66.873	78.5532	-5.45386	-41.0992	-107.398	-25.0304	13.2141	-97.876	5.57202
-16.4191	21.3994	-115.675	37.0192	96.1156	46.9929	-87.041	151.414	-114.083	-87.7469	57.595	148.523	122.235	-63.5795	-11.4031	25.8995	-254.065	-339.612	66.3999	33.0121	81.7715	-180.557	-419.229	-89.4607	-133.272	222.355	-39.572	-72.8606	13.7556	-474.54	-253.164	-57.7507	135.981	-160.693	-116.443	-409.629	25.1842	83.7041	-144.855	8.31384	67.3514	78.5668	-5.59009	-40.7056	-107.59	-24.8931	13.1854	-99.6656	6.86255
-16.0563	20.9543	-115.667	37.431	95.7943	47.4285	-87.4783	151.961	-115.072	-87.3383	56.8303	148.799	121.591	-63.756	-11.1395	26.3811	-254.288	-340.173	66.587	31.8181	82.9987	-181.074	-420.051	-88.2124	-133.906	222.17	-40.3585	-74.1198	14.4631	-476.318	-253.581	-58.2494	136.557	-162.282	-115.449	-409.676	26.2075	84.1572	-144.61	8.38477	67.7297	78.8729	-6.16101	-39.7434	-108.205	-24.165	12.2773	-101.013	7.77979
-15.421	20.5723	-115.593	38.1267	95.1835	47.8011	-87.9158	152.562	-116.211	-87.1846	56.3564	150.111	121.182	-63.4524	-10.7452	26.89	-254.535	-340.998	66.8629	30.6398	84.0092	-182.486	-420.949	-86.6418	-134.838	221.187	-40.9904	-75.965	14.8076	-477.116	-253.741	-58.8766	137.019	-162.784	-115.081	-409.719	27.0343	84.2675	-143.408	8.41614	68.2533	79.2965	-6.4906	-38.842	-108.254	-23.4271	11.1674	-101.603	8.81677
-15.0111	20.3256	-115.524	38.9658	94.5885	47.9492	-88.7183	152.811	-117.435	-86.9341	56.0299	151.206	120.565	-63.1285	-10.2687	27.4662	-254.87	-342.35	68.1632	30.2209	85.0219	-184.918	-422.031	-85.9187	-135.249	220.621	-41.4611	-76.4457	15.4006	-478.918	-254.255	-59.7271	137.47	-163.537	-114.332	-409.509	27.1812	85.1735	-141.948	8.50671	68.8632	79.7448	-6.3396	-37.6783	-107.527	-23.2538	10.3064	-102.244	9.87793
-14.6556	20.1775	-115.938	39.6649	94.01	48.3962	-89.0356	153.103	-118.774	-86.7675	55.6267	151.849	120.329	-63.0453	-9.65881	28.0029	-255.741	-343.862	69.5676	30.2262	85.786	-185.594	-423.985	-86.048	-135.799	220.734	-42.2609	-77.2991	16.3252	-479.686	-255.826	-60.5337	137.354	-165.373	-113.683	-409.708	26.3777	85.9578	-141.06	9.72791	69.1395	79.9862	-6.36487	-36.8578	-107.13	-22.0034	9.9176	-102.86	10.9402
-13.9821	19.8145	-116.62	40.1564	93.7437	48.7957	-89.3759	153.478	-119.429	-86.8166	55.1671	152.5	120.207	-62.8176	-9.10571	28.3044	-255.808	-344.51	70.0382	29.957	86.5975	-185.97	-425.618	-84.9187	-136.673	219.828	-43.3704	-77.9194	16.6505	-481.058	-257.216	-61.5817	137.486	-167.361	-113.132	-410.419	24.9238	86.3073	-140.655	10.5833	69.1744	80.6328	-6.25549	-36.657	-106.486	-21.4326	9.03113	-104.105	12.3689
-13.3322	19.6829	-117.13	40.7565	93.1409	49.5383	-89.9314	154.317	-120.09	-86.9698	54.411	153.281	119.511	-62.3468	-8.43347	28.5818	-257.484	-345.755	70.5674	29.4114	86.7958	-186.455	-425.946	-83.6101	-137.515	218.951	-43.5726	-79.0817	16.8496	-482.339	-257.503	-62.2343	137.464	-167.723	-112.604	-411.493	24.2032	86.865	-140.35	10.6388	69.2059	81.1189	-6.2832	-36.2592	-105.887	-20.3894	8.61121	-105.273	14.2805
-12.8212	19.8379	-117.512	41.502	92.7926	49.6682	-90.2148	154.711	-121.161	-87.1882	53.6848	154.025	119.143	-61.2657	-8.02173	28.9017	-259.061	-346.185	70.8219	29.7299	87.5022	-187.663	-426.613	-82.0858	-138.173	217.489	-43.7751	-80.5439	16.3729	-483.012	-258.33	-62.702	137.899	-168.869	-112.127	-413.601	23.6398	87.0011	-140.088	10.8812	69.1418	81.2703	-6.18054	-34.6799	-105.296	-20.1567	7.38379	-106.364	14.869
-11.9871	19.6218	-118.248	42.6879	92.217	50.0109	-90.6611	155.051	-122.281	-87.2651	53.1971	155.43	118.17	-60.6958	-7.56714	29.1929	-259.662	-347.083	71.2107	30.8859	88.1357	-188.171	-428.447	-81.0398	-138.729	215.318	-44.4329	-81.1986	15.1209	-483.061	-259.213	-63.2933	138.199	-169.502	-111.798	-414.978	22.4896	86.7262	-139.71	11.0671	69.0615	81.3704	-5.95618	-33.4738	-104.386	-19.8671	6.83228	-107.073	15.3334
-11.2449	19.0745	-118.816	44.0959	91.1625	50.7609	-91.621	155.546	-123.317	-87.3308	52.5315	156.121	117.75	-60.4594	-7.06567	29.2722	-260.679	-347.479	71.5382	31.7832	88.936	-188.811	-429.82	-80.047	-139.736	214.753	-45.24	-81.6479	14.2234	-483.066	-260.684	-64.3738	138.69	-170.102	-111.885	-416.737	20.3179	85.8052	-139.084	11.226	68.9664	81.0123	-5.92126	-33.0703	-103.432	-19.6553	6.56128	-107.812	16.1317
-9.86047	19.2362	-119.438	44.0936	91.1764	51.672	-92.0394	155.972	-124.455	-87.4374	52.1218	157.094	117.458	-60.1476	-6.57141	29.3118	-262.028	-348.41	71.4901	32.5314	89.3633	-189.629	-430.163	-79.6564	-142.351	214.362	-45.9733	-81.9467	13.6725	-482.978	-261.46	-65.5403	138.97	-171.275	-112.041	-418.452	19.1929	85.0951	-138.292	12.0085	69.1976	81.3795	-6.03833	-32.6779	-102.517	-19.4167	6.04602	-108.298	17.6953
-9.08423	19.053	-120.408	44.8684	91.3234	52.0056	-92.6738	156.448	-126.038	-87.7107	52.2612	157.728	117.235	-59.6028	-6.20789	29.3442	-262.572	-349.428	71.2925	32.9102	89.6528	-190.513	-431.058	-78.9047	-143.298	213.586	-46.9087	-82.7728	13.077	-483.268	-261.829	-66.0288	139.65	-171.889	-112.553	-420.946	17.9023	84.2179	-138.617	12.2603	69.2961	81.7372	-6.26099	-31.8344	-101.581	-19.3513	5.01868	-109.211	19.1002
-7.67944	18.7601	-121.058	45.7251	91.7446	51.9325	-93.2932	157.147	-127.672	-87.9749	52.9249	158.557	116.941	-59.6484	-5.94385	28.8436	-263.685	-350.546	71.7662	33.5564	90.0208	-191.297	-433.654	-77.6885	-143.544	212.051	-47.5197	-83.3268	12.8383	-483.781	-262.329	-66.5652	141.177	-172.272	-112.996	-421.785	17.5006	83.7408	-139.018	12.6311	69.2627	81.7372	-6.30042	-31.427	-100.789	-19.5759	4.47693	-110.171	19.7396
-6.7616	18.3778	-122.138	46.5312	91.9374	52.3506	-93.9028	157.872	-129.071	-88.1521	53.3722	158.997	116.944	-59.531	-5.67737	28.3771	-264.903	-351.253	71.8458	34.0869	90.5768	-191.864	-435.058	-76.2742	-143.798	210.294	-48.1023	-84.6083	12.6282	-484.551	-263.675	-67.1512	141.468	-173.205	-113.591	-423.775	15.8591	84.0092	-139.368	13.2563	69.4265	80.7579	-6.21423	-29.1771	-100.069	-19.8986	3.75647	-111.241	20.1494
-5.35339	17.8777	-122.639	47.1984	92.6741	52.8687	-94.7211	158.233	-129.963	-88.7617	54.0853	159.424	117.037	-59.8123	-5.49255	28.1031	-267.303	-352.279	72.2085	34.8867	91.3076	-192.901	-435.264	-75.1238	-144.374	209.475	-48.5643	-85.5054	12.2505	-485.884	-264.162	-68.5598	141.799	-175.218	-114.066	-425.311	16.085	84.717	-138.922	14.959	69.1177	80.7065	-6.15002	-28.2024	-98.797	-20.7223	3.06335	-112.154	21.1309
-4.30261	17.3362	-123.547	47.798	93.0532	53.7704	-95.126	159.229	-131.175	-89.1844	55.1825	159.732	117.01	-60.5208	-5.20959	27.9984	-267.821	-353.322	73.0973	35.9496	91.9177	-193.801	-435.64	-74.6068	-145.382	208.989	-48.7826	-85.897	11.7914	-487.263	-265.04	-69.6515	142.08	-176.797	-115.284	-425.987	17.045	85.6246	-137.912	15.6478	68.9617	80.5656	-5.91016	-27.2526	-97.535	-22.1238	2.07031	-114.024	23.6708
-3.6062	16.5192	-124.711	48.356	93.1368	54.8501	-95.6616	159.924	-132.777	-89.7488	55.5923	160.517	117.071	-61.3939	-5.11023	27.9291	-268.845	-354.106	74.3105	36.6685	92.9832	-194.272	-437.127	-74.2061	-146.525	207.662	-49.5856	-86.3611	11.4812	-488.371	-265.791	-70.8459	141.997	-177.781	-116.662	-427.466	16.8893	85.9055	-136.968	15.8641	68.5813	80.7427	-5.80908	-26.0734	-95.2191	-22.7555	1.52783	-115.708	24.7017
-2.97913	16.4952	-125.332	49.3152	93.3816	55.6194	-95.9536	160.357	-133.988	-90.4238	56.2783	160.684	117.075	-61.9374	-5.05273	26.5142	-270.036	-355.618	74.4833	36.8412	93.7363	-194.578	-438.656	-73.8197	-147.781	206.226	-50.1194	-85.6123	11.1443	-490.177	-266.325	-71.6381	142.172	-178.584	-117.883	-429.198	16.618	85.7892	-135.234	15.8944	68.4924	80.9912	-5.75525	-25.1537	-94.5414	-22.0239	0.865967	-116.751	25.6111
-2.46326	16.3589	-124.615	49.7245	93.3812	56.2819	-95.9794	161.001	-134.922	-91.1864	57.5005	160.891	117.045	-63.203	-4.96338	25.5267	-272.501	-356.302	74.5413	37.4139	94.2391	-195.228	-439.334	-73.3077	-148.429	205.368	-51.0304	-85.5375	11.0173	-491.443	-267.143	-72.0751	142.352	-180.782	-118.622	-430.629	16.5784	86.1619	-133.7	16.7281	68.505	81.3541	-5.59534	-23.8203	-94.2526	-21.6935	0.320068	-117.213	26.0494
-2.42908	16.0641	-123.788	50.3499	93.3462	56.4122	-96.3062	161.786	-136.116	-91.9594	58.9053	161.443	117.123	-64.6342	-4.86353	25.0801	-273.441	-357.256	74.7516	37.9138	94.8002	-196.707	-439.825	-72.4966	-148.976	204.803	-51.6565	-84.0637	11.035	-492.275	-268.187	-72.8297	142.701	-181.969	-119.127	-431.511	16.8304	85.6732	-132.419	17.316	68.4756	81.672	-5.45215	-24.0315	-94.7207	-21.3989	-1.09985	-117.502	26.8856
-1.64941	15.9288	-122.854	51.366	93.1639	56.9421	-96.7823	162.785	-137.957	-92.6105	59.6683	161.712	117.284	-65.7854	-4.74792	25.0349	-274.071	-357.584	75.1184	38.6504	95.8062	-198.44	-439.854	-71.5537	-148.925	203.98	-52.4366	-83.1936	10.8489	-494.315	-269.788	-73.4431	143.084	-183.562	-120.786	-433.186	16.2563	85.1804	-132.26	17.5516	68.3767	82.042	-5.29907	-23.7223	-95.3815	-21.5194	-2.69934	-118.107	28.5438
-0.118652	15.8074	-122.068	52.1343	93.1392	57.2959	-97.4515	163.95	-138.991	-93.3231	60.3206	161.508	117.723	-64.384	-4.64771	25.6602	-274.846	-357.916	76.0493	39.4066	96.752	-199.657	-438.662	-70.9048	-147.978	202.87	-52.574	-81.417	10.8462	-495.513	-270.887	-73.5946	143.667	-184.705	-122.468	-435.44	15.8904	84.8138	-131.752	18.0856	68.0413	81.7413	-5.34424	-23.1337	-95.5499	-21.7266	-3.63293	-118.801	30.6234
0.776855	15.6283	-121.224	52.8517	92.6858	57.3124	-97.4418	164.365	-139.639	-93.5013	60.746	160.886	117.952	-63.8743	-4.42468	26.0197	-276.669	-358.813	76.7528	39.2069	97.6796	-199.844	-437.555	-69.7578	-146.165	202.514	-53.0961	-80.514	10.8558	-496.319	-271.276	-73.632	144.061	-186.413	-123.093	-436.848	14.5162	83.6311	-131.211	18.6895	67.6396	81.6827	-5.14355	-21.6359	-95.0033	-22.3883	-4.58594	-119.344	31.51
1.52478	15.7107	-121.482	53.3259	92.2406	57.8429	-98.0137	164.68	-140.609	-93.6916	61.0054	160.448	118.141	-63.7759	-4.09485	26.8784	-277.239	-359.823	77.2999	38.9839	98.3961	-199.903	-436.425	-69.7874	-145.623	201.51	-53.9001	-79.9291	10.9446	-498.295	-272.401	-73.59	143.803	-187.353	-123.777	-438.069	13.1759	83.3716	-130.746	18.9393	67.2333	81.7006	-4.72595	-20.7404	-94.5682	-23.8319	-6.16125	-120.473	31.8931
2.27356	15.9045	-122.26	53.8334	91.9771	58.7461	-98.5651	165.295	-141.352	-94.2856	61.7535	159.718	117.678	-64.8148	-3.92346	28.2455	-277.928	-361.822	77.3969	38.8639	99.859	-200.209	-435.252	-68.9634	-145.111	200.426	-54.4364	-79.0621	10.9299	-499.629	-273.925	-73.4589	143.485	-187.792	-124.512	-440.006	12.7668	82.4922	-130.5	19.469	66.8472	81.0717	-4.4834	-20.6392	-94.0123	-25.494	-7.14282	-120.959	32.5675
2.98572	16.2134	-122.558	53.9912	91.8146	59.5359	-99.005	165.883	-142.043	-93.9097	61.6168	158.785	117.058	-65.3951	-3.75952	29.0262	-278.428	-363.083	78.2119	38.8475	101.568	-200.238	-433.637	-68.1007	-144.816	199.272	-55.2261	-77.4421	10.7687	-500.22	-274.881	-73.3555	143.456	-188.717	-126.906	-441.692	12.8768	81.7766	-130.627	19.8533	66.6472	80.8134	-4.43335	-20.5964	-93.6152	-26.4979	-7.79004	-121.223	33.8604
3.99365	16.3457	-122.81	54.3347	91.8927	59.6732	-99.7736	166.51	-142.845	-93.5468	61.2983	158.824	116.952	-65.6445	-3.52869	30.1305	-279.31	-363.626	78.7358	38.6868	101.762	-200.428	-431.796	-67.579	-144.474	198.304	-55.7144	-76.4956	10.6674	-501.017	-275.237	-73.6345	143.406	-190.45	-128.468	-442.7	12.8237	81.2273	-131.009	19.9359	66.8199	81.384	-4.78137	-21.4526	-93.1931	-28.5079	-8.51941	-121.688	35.6193
5.50867	16.5128	-122.895	55.2732	91.9327	59.7689	-100.091	166.787	-143.217	-93.078	61.2903	159.033	116.897	-66.0314	-3.03308	32.4999	-280.812	-364.875	79.4424	38.4375	102.201	-200.832	-430.908	-65.5992	-143.688	197.373	-56.1454	-74.3259	10.5233	-502.338	-276.406	-73.8848	143.721	-192.113	-128.663	-443.752	12.5143	80.3094	-131.869	19.8236	67.2483	81.5699	-5.12988	-22.8202	-92.8832	-30.0666	-9.15552	-122.156	37.144
6.78552	16.6947	-123.43	55.7184	92.3335	59.8763	-100.701	166.954	-144.404	-92.5884	61.1766	159.119	116.551	-66.0619	-2.55103	33.886	-281.507	-367.209	79.6141	38.3779	102.65	-201.524	-430.105	-64.2642	-142.571	196.718	-56.4615	-73.7325	10.6748	-503.745	-277.749	-74.01	143.152	-192.663	-129.251	-446.45	11.8311	80.149	-132.663	19.9222	67.1699	80.9478	-5.40417	-23.3093	-92.5834	-31.7355	-10.4982	-122.671	37.5996
7.45728	16.7632	-123.904	55.9825	92.9437	59.9232	-101.234	167.428	-145.471	-92.7194	61.1046	159.044	115.926	-66.3942	-2.08167	34.3881	-282.705	-368.268	79.6475	38.3522	102.863	-202.143	-428.817	-63.5205	-141.406	195.273	-56.5492	-73.0027	10.058	-505.021	-278.569	-74.2665	142.924	-192.986	-131.732	-448.288	11.3912	80.3976	-133.607	19.3943	67.3687	80.8148	-5.94885	-23.7391	-93.3412	-33.0173	-12.3761	-122.677	39.1519
7.63037	16.762	-124.721	56.2729	93.2616	59.9579	-101.703	168.001	-146.193	-93.301	60.8999	158.849	115.339	-67.1505	-1.56323	34.6337	-283.79	-369.244	78.4302	38.2355	103.062	-202.63	-427.431	-62.8541	-141.641	194.502	-56.604	-72.1908	9.40173	-507.053	-278.902	-74.7229	142.867	-194.021	-133.233	-449.533	10.8196	81.1041	-134.355	17.7192	67.627	81.3709	-6.56445	-24.6448	-93.0641	-34.2828	-12.9492	-122.652	40.5778
8.36621	16.756	-125.814	56.4799	93.4653	60.0122	-101.793	168.485	-147.251	-94.0789	60.4358	158.675	114.807	-68.3242	-0.97998	34.3441	-285.647	-371.039	76.9651	37.9922	103.395	-202.989	-426.807	-62.1779	-142.419	193.334	-56.8302	-72.4373	8.01624	-507.999	-279.473	-75.0134	143.122	-195.559	-133.456	-450.909	9.99426	81.7467	-135.371	18.3209	67.1396	81.8773	-6.99719	-26.9879	-92.6938	-35.5499	-14.4917	-122.727	41.5582
9.51404	16.7543	-126.543	56.601	93.8124	60.0376	-101.891	168.723	-148.015	-94.3813	59.1562	158.487	114.763	-68.957	-0.727051	33.9403	-286.366	-373.013	75.9493	37.4882	103.739	-203.433	-425.853	-61.7821	-143.003	192.392	-57.0629	-72.6725	7.79187	-508.419	-280.408	-75.417	142.717	-196.028	-134.424	-453.147	9.43762	81.9674	-136.166	18.7028	67.0953	82.3705	-6.92273	-27.3953	-91.9175	-37.6331	-15.4978	-122.745	43.1305
9.80872	16.7578	-126.989	56.7861	93.7809	60.1306	-102.042	168.907	-150.074	-94.8586	58.3942	158.114	114.72	-69.3375	-0.700562	33.2384	-286.949	-373.757	75.6912	37.1785	104.046	-204.452	-425.447	-61.2816	-143.336	191.035	-57.2312	-72.8424	7.37231	-509.887	-280.898	-75.7479	142.483	-196.503	-136.618	-453.524	8.92529	82.3694	-137.334	19.0554	67.7063	83.356	-6.48511	-28.4127	-91.219	-38.3929	-16.5853	-122.616	43.9551
10.511	16.7574	-128.01	57.0405	93.6322	60.1643	-102.152	169.043	-151.227	-95.574	57.2311	158.053	113.946	-69.7075	-0.553833	32.1633	-287.111	-374.535	75.1466	37.0156	104.332	-204.886	-425.593	-60.0891	-143.577	189.659	-57.7335	-72.8265	6.64148	-512.042	-281.483	-75.9882	142.169	-197.263	-138.318	-452.514	8.39722	82.9558	-138.677	19.9667	68.7214	83.5671	-6.44238	-29.256	-90.3285	-39.0823	-17.8049	-122.777	45.1929
10.7417	16.7683	-129.403	57.4423	93.5591	60.1917	-102.217	169.158	-152.12	-95.9006	56.5106	158.087	113.379	-69.9972	-0.132935	31.171	-287.515	-376.259	74.8729	36.126	104.746	-205.683	-425.778	-59.2183	-143.801	189.271	-58.1769	-72.8322	6.24634	-512.277	-281.891	-76.0829	141.902	-198.74	-138.999	-451.276	7.84265	82.9897	-139.173	20.1245	68.8428	83.822	-6.59521	-29.3572	-89.5187	-40.2432	-19.446	-122.816	46.0808
10.9534	16.7816	-131	57.99	93.4181	60.1547	-102.122	168.818	-153.56	-95.979	55.536	158.044	112.743	-70.0793	0.237915	30.2378	-288.369	-377.443	74.2715	35.0665	104.884	-206.459	-426.006	-58.3302	-143.969	188.858	-58.1749	-72.6813	5.92578	-513.713	-282.851	-75.7333	142.017	-198.838	-139.651	-451.353	6.88074	82.897	-140.018	19.7177	68.7219	83.9148	-6.98547	-29.1857	-89.2461	-43.2284	-19.8944	-123.014	47.5718
11.2372	16.7651	-131.755	58.3464	93.4856	60.2042	-102.095	168.558	-154.558	-95.8596	55.287	158.039	113.238	-70.4768	0.88501	28.3734	-289.569	-378.286	73.5784	34.2313	105.13	-207.462	-426.14	-56.9379	-144.038	187.146	-58.6333	-72.172	5.25391	-513.722	-283.569	-75.1844	141.394	-199.395	-140.927	-452.084	6.57874	82.765	-140.578	18.2952	68.4707	83.8036	-7.58716	-29.1154	-89.4691	-44.0635	-21.1077	-123.376	48.4268
11.4893	16.7865	-132.551	58.5443	93.4766	60.1465	-101.998	168.246	-156.131	-95.7726	54.1606	158.04	113.491	-70.8015	1.65808	27.7825	-290.05	-378.626	72.384	33.017	105.315	-208.16	-425.825	-55.8154	-144.027	185.209	-58.9563	-72.1696	3.96497	-515.147	-283.976	-74.5924	140.821	-199.587	-141.94	-453.176	5.97974	82.3961	-142.146	17.537	68.8357	83.7543	-7.83313	-29.0635	-89.5455	-44.899	-21.9894	-123.482	49.5562
11.6211	16.7587	-133.854	59.2364	93.2385	60.1102	-101.605	167.635	-157.293	-95.714	52.5646	158.037	113.349	-71.5114	2.30933	28.9363	-290.301	-379.262	71.5096	31.8376	105.087	-208.322	-424.604	-55.3993	-144.114	184.892	-59.3538	-71.9266	2.92822	-516.543	-284.509	-74.2767	140.564	-199.732	-143.015	-453.844	5.09387	82.0027	-142.982	17.9684	69.1478	84.3827	-8.08813	-29.0198	-89.9021	-45.6309	-22.2286	-123.208	50.4463
11.8086	16.7424	-135.193	59.9652	92.7435	60.0669	-100.857	167.25	-158.673	-95.5542	51.4805	158.054	113.517	-72.246	3.20862	30.3784	-290.32	-380.042	71.5461	30.7836	104.974	-209.489	-423.377	-54.2672	-144.31	183.768	-60.3568	-71.4959	2.07507	-516.909	-285.357	-73.988	140.272	-198.613	-143.339	-454.09	4.04749	82.1901	-144.14	18.3748	69.0425	84.5731	-8.43713	-29.436	-90.8195	-46.4287	-23.3312	-122.521	50.8599
11.9293	16.7567	-135.876	60.447	92.5858	59.9196	-100.163	166.777	-159.528	-95.511	51.0531	158.077	113.542	-73.3596	3.17969	31.9049	-290.095	-380.957	72.2723	30.2264	104.849	-210.589	-422.479	-53.4679	-144.327	182.534	-61.3733	-70.6772	1.68298	-518.726	-286.285	-73.2291	140.339	-198.285	-143.351	-452.371	3.08118	82.642	-144.506	18.9589	69.0094	84.5703	-8.77429	-29.4032	-92.2026	-46.1508	-25.9296	-122.258	51.3844
12.5923	16.7429	-136.896	61.1128	92.2448	59.9749	-99.8628	166.396	-160.089	-95.1412	50.339	158.036	113.66	-73.859	3.15918	32.3173	-289.651	-382.024	72.7253	30.0347	104.736	-210.922	-421.123	-52.7516	-145.287	181.885	-61.8113	-69.6127	0.729004	-519.809	-286.699	-72.7616	140.348	-198.369	-143.516	-450.173	2.30017	83.0061	-145.771	19.0995	68.9689	85.1163	-8.97205	-29.2731	-92.3717	-44.8716	-27.1993	-121.828	53.2373
12.8889	16.7241	-138.085	61.4524	91.7063	59.76	-99.338	165.895	-160.785	-94.3716	50.0547	158.047	113.85	-74.3926	2.99133	33.3375	-289.401	-382.418	72.8063	28.2111	104.289	-211.254	-419.349	-52.0442	-146.906	180.275	-61.9943	-69.6172	-0.161987	-520.79	-287.641	-72.4626	140.203	-198.944	-143.705	-448.898	1.4425	83.033	-146.813	18.785	69.5044	85.1283	-9.54626	-28.8075	-92.5676	-43.8452	-27.6091	-121.981	54.4115
13.8878	16.7396	-139.33	61.835	91.4187	59.5219	-98.8647	165.706	-161.934	-93.6117	48.4987	158.055	113.995	-74.9464	2.90405	34.4902	-289.275	-382.755	72.7637	27.6439	104.03	-211.449	-417.911	-51.6516	-147.745	179.786	-62.1605	-68.8727	-0.675171	-522.014	-288.115	-72.4314	139.978	-200.388	-143.945	-448.681	0.387207	83.0215	-147.864	18.9166	69.9084	85.4167	-9.84204	-28.4045	-92.5365	-43.9611	-28.2441	-122.14	54.8646
15.0267	16.7224	-140.091	62.4642	91.0931	59.601	-97.984	164.416	-162.914	-92.9449	47.2637	158.095	114.628	-75.2051	3.02112	35.4495	-289.335	-383.907	72.887	26.7877	103.992	-212.097	-416.516	-51.038	-148.114	178.289	-63.0933	-68.3319	-0.525757	-523.825	-289.127	-72.4492	139.475	-201.222	-145.292	-448.95	0.371094	82.6852	-149.254	18.9517	70.9277	85.947	-9.76587	-28.3816	-92.3303	-44.4312	-30.5225	-122.756	56.6016
15.6829	16.7344	-141.221	63.0547	90.8812	59.6373	-97.2908	163.664	-163.443	-93.0049	46.0687	158.039	114.938	-76.4147	3.10815	36.1815	-289.271	-384.415	72.9863	26.2854	103.928	-212.795	-415.263	-50.8112	-148.525	177.055	-63.5055	-68.1561	-0.524292	-524.815	-290.774	-72.5521	139.332	-201.627	-146.748	-449.257	1.04175	83.0544	-150.516	19.5784	72.5786	86.1692	-10.1974	-28.2968	-92.074	-44.895	-32.1959	-123.298	58.073
16.6584	16.6875	-142.153	63.3826	90.6294	59.6687	-97.0946	163.101	-163.719	-93.2812	45.6323	158.059	115.684	-77.0095	3.20227	37.0314	-289.581	-384.442	72.8007	24.6926	103.913	-213.031	-414.235	-50.4457	-149.336	175.478	-63.7775	-67.6951	-0.893677	-525.705	-291.179	-73.5531	138.905	-201.731	-147.375	-449.584	1.71448	84.1653	-152.311	18.9735	73.6552	86.8986	-10.6967	-28.1652	-91.9843	-44.8228	-32.8859	-123.069	59.3048
18.2543	16.611	-143.716	64.057	90.9979	59.6272	-96.845	162.384	-164.113	-93.1609	45.1907	158.25	116.393	-77.4338	3.26892	37.4474	-290.664	-384.426	72.8102	23.7047	103.942	-213.642	-413.519	-50.3407	-150.71	174.482	-63.8446	-67.5656	-0.571899	-526.592	-293.23	-73.8102	138.655	-202.237	-147.647	-450.223	2.90918	83.9952	-153.234	17.7509	73.6868	87.5742	-11.0496	-28.2332	-92.5764	-44.4067	-33.5151	-122.228	60.3239
19.7335	16.547	-145.283	64.9143	91.1898	59.5791	-96.0742	162.026	-164.513	-93.4131	43.7736	158.699	117.201	-78.0419	3.2959	37.8903	-291.202	-384.527	72.6675	23.4398	103.996	-214.165	-412.095	-49.6791	-151.945	173.724	-64.3655	-67.3357	0.206909	-529.319	-293.872	-74.9443	139.335	-203.023	-147.446	-450.678	4.11414	83.3212	-154.284	17.452	74.8589	88.6586	-11.5055	-28.3287	-92.8121	-43.8978	-34.8867	-121.246	61.4595
20.5928	16.6155	-146.352	65.4546	91.5153	59.5682	-95.2925	162.119	-164.776	-93.4991	42.5151	158.902	118.253	-78.9457	3.38867	37.9758	-291.855	-384.57	72.7461	22.819	104.137	-214.171	-411.116	-49.0234	-152.126	172.293	-64.7262	-67.0591	1.47205	-530.263	-295.285	-76.1982	139.417	-203.316	-145.998	-451.131	5.36841	82.6411	-156.407	16.3225	76.4966	89.4385	-11.8206	-28.3564	-93.7798	-43.3975	-36.9384	-121.57	63.142
21.2053	17.0311	-147.048	66.0685	91.8208	59.3733	-94.5204	162.474	-165.103	-93.551	41.3269	159.009	118.142	-80.2318	3.7063	38.0537	-292.897	-384.944	72.2599	22.2216	104.304	-214.014	-409.984	-48.2435	-152.275	171.634	-64.9445	-66.8417	2.63318	-531.244	-296.051	-77.3285	139.908	-203.649	-143.856	-451.36	6.34363	82.2478	-157.527	15.3713	78.4398	89.7427	-12.9247	-28.425	-94.9939	-42.0822	-37.37	-121.579	65.3962
21.7665	17.1503	-147.939	66.3059	92.3166	59.1228	-93.7365	162.54	-165.718	-93.3712	40.8312	159.25	119.529	-80.9033	4.04272	38.0079	-294.019	-385.036	71.4192	21.6444	104.517	-212.923	-409.504	-47.7307	-152.591	170.335	-65.2552	-67.0619	3.59387	-533.317	-298.345	-78.7626	141.791	-204.156	-143.419	-451.639	7.14417	82.226	-158.372	15.0697	78.9524	91.046	-13.3287	-28.2472	-96.7094	-41.0494	-38.5477	-121.837	65.8583
22.2874	17.2006	-148.894	66.5598	92.7266	59.0992	-92.8865	162.721	-166.551	-92.8148	40.0325	159.683	119.691	-81.5348	4.578	38.0087	-295.255	-384.677	71.1541	20.9691	105.216	-211.903	-408.322	-47.4084	-153.584	169.699	-66.0574	-67.1495	4.54871	-534.815	-299.115	-80.0751	142.092	-204.699	-142.271	-451.725	7.80994	82.1003	-159.174	14.7814	79.5105	91.3575	-13.4126	-28.3417	-97.866	-40.2283	-39.5991	-122.78	66.3683
22.879	17.1488	-149.661	66.7726	92.9344	58.9492	-92.2207	163.042	-167.135	-92.1462	39.6423	160.373	120.147	-82.2587	5.08423	37.9996	-296.207	-384.188	70.2944	20.6035	105.508	-211.492	-406.713	-47.3373	-154.174	169.025	-65.848	-67.282	5.55615	-535.117	-300.329	-80.6046	142.614	-205.382	-141.043	-451.417	8.57019	81.8418	-160.535	14.5623	79.5027	91.9082	-13.7399	-28.0872	-98.2888	-38.4094	-41.0636	-124.113	68.2014
23.8763	17.0751	-150.591	67.0935	92.925	58.8499	-91.5743	163.312	-167.842	-90.7148	38.8379	160.821	120.428	-82.7063	5.29944	38.033	-297.227	-383.829	69.2513	20.0548	105.462	-211.82	-406.071	-47.416	-154.817	168.322	-65.8696	-67.4077	5.97949	-536.114	-301.436	-81.7468	142.785	-205.884	-140.012	-450.72	9.04553	81.6284	-162.069	14.2612	80.0604	92.3384	-14.197	-27.1389	-98.4448	-37.4087	-42.6334	-123.895	69.6934
25.3676	17.3711	-151.167	67.3458	92.9899	58.7343	-91.3887	163.627	-168.706	-89.6198	37.8768	161.284	120.743	-83.7931	5.83923	38.0234	-299.084	-383.584	68.7679	19.4546	104.759	-212.422	-405.494	-46.8934	-155.267	167.931	-65.6713	-67.5184	6.24438	-537.315	-302.716	-82.4493	142.739	-206.213	-139.428	-450.19	9.73315	81.4604	-162.425	13.8489	80.4611	93.4108	-14.5853	-26.4043	-99.7258	-36.0067	-43.38	-123.836	70.9995
25.8219	17.6594	-151.559	67.4263	93.1588	58.281	-90.9899	164.392	-169.387	-88.4746	37.1404	161.859	120.4	-84.5708	5.36304	38.2098	-299.621	-383.972	68.329	18.8035	104.467	-213.364	-404.851	-46.2997	-156.206	167.4	-65.1251	-68.0723	6.8595	-538.845	-303.035	-83.1875	142.924	-206.098	-138.732	-450.058	10.0464	81.3859	-162.947	13.4318	81.5081	95.0123	-14.7479	-25.3528	-99.6552	-34.0153	-44.3815	-124.006	71.2828
25.9246	17.8229	-153.005	67.3658	93.1721	57.8046	-90.804	164.682	-170.115	-87.4319	36.6593	163.593	119.589	-85.1437	4.0365	37.9078	-300.754	-384.418	68.2345	18.4126	103.568	-215.917	-402.836	-45.5603	-157.874	167.02	-64.5126	-68.3889	6.71729	-539.52	-302.917	-84.0255	143.093	-206.559	-138.482	-449.865	9.51611	80.4332	-163.383	13.5624	82.7844	96.0243	-15.4302	-25.1998	-99.3114	-33.3676	-46.062	-123.289	71.4252
26.5681	18.2068	-153.603	67.3165	93.072	57.6318	-90.6193	164.871	-170.938	-86.5986	35.9768	164.506	119.528	-85.5527	3.39746	37.6035	-301.654	-384.727	67.5469	17.7985	102.735	-217.113	-401.685	-45.4174	-159.308	166.72	-63.895	-68.7771	6.40967	-540.227	-302.94	-84.3258	143.18	-206.94	-138.888	-449.595	9.62061	79.8049	-163.712	13.5505	82.5178	95.9628	-15.5746	-24.6144	-99.2588	-34.4635	-47.8558	-123.303	72.7841
27.6332	18.7594	-154.714	67.3007	92.9823	57.525	-90.5518	165.062	-171.417	-86.1938	35.202	165.254	119.827	-85.9307	2.93152	37.0851	-303.244	-385.744	66.8303	17.3147	102.159	-217.07	-401.109	-45.6367	-159.322	166.611	-63.6104	-69.236	6.27588	-540.958	-303.16	-85.2395	143.077	-207.285	-139.219	-449.768	9.85278	78.4906	-163.989	13.0538	82.2274	96.4822	-16.4391	-23.0338	-99.3783	-35.7595	-48.8293	-123.235	74.8348
28.2986	19.2859	-155.572	67.299	92.8667	57.2966	-90.1268	165.091	-172.614	-84.9043	34.4652	165.651	120.764	-86.3187	2.36218	36.6884	-304.174	-386.292	65.5765	16.975	101.819	-217	-400.151	-45.934	-160.305	166.344	-63.3041	-69.3895	6.22241	-541.631	-303.247	-86.5669	142.867	-207.655	-139.565	-450.156	10.2225	77.4459	-164.029	12.818	81.7864	96.5854	-17.0183	-22.0388	-99.3569	-37.2852	-49.1273	-122.891	75.3472
28.7697	20.0111	-156.84	67.3176	92.8583	57.0876	-89.6908	165.029	-173.946	-83.601	33.6436	166.169	121.018	-86.6191	1.76428	36.6671	-305.646	-388.865	64.8436	16.6707	101.098	-217.699	-398.404	-46.7352	-161.545	165.983	-62.7878	-69.7488	6.276	-542.084	-302.361	-87.2094	142.384	-208.884	-139.629	-450.39	11.4591	77.3779	-164.309	12.8719	81.8739	96.2301	-17.4725	-21.8774	-99.7013	-39.0853	-50.4476	-122.389	75.9752
29.1393	20.5074	-158.613	67.2242	92.8822	57.1326	-89.338	165.172	-174.749	-81.9142	32.4121	167.104	120.968	-86.8265	0.423096	36.6626	-306.624	-389.895	64.1768	16.3657	100.387	-219.029	-396.571	-47.0941	-162.787	165.748	-62.1438	-69.8438	6.03455	-542.558	-300.916	-87.479	142.449	-210.032	-139.634	-450.854	13.3132	76.5751	-165.03	12.5441	81.8566	95.2325	-17.6558	-21.1212	-100.194	-39.8625	-52.4697	-121.879	76.4459
28.8789	21.6538	-159.829	67.3137	93.0236	57.5259	-89.0907	165.81	-175.649	-80.6293	31.9266	168.323	120.966	-86.9133	-0.339233	36.6146	-307.159	-391.558	63.918	15.889	99.942	-220.112	-396.261	-47.6707	-163.538	165.119	-60.9875	-70.1276	6.14087	-543.542	-299.841	-88.2948	142.701	-211.589	-140.229	-451.572	14.3983	75.0645	-165.242	12.1172	81.2937	94.6672	-17.7537	-19.9922	-100.787	-40.5778	-53.8359	-121.722	77.0905
28.5607	22.6869	-160.753	67.6013	92.9354	57.7806	-89.0134	166.863	-176.664	-79.4186	30.9132	169.226	120.251	-86.501	-1.47314	36.4597	-308.366	-392.867	63.368	15.2841	99.0936	-220.097	-395.918	-48.0592	-163.967	164.803	-59.4856	-70.4891	6.21082	-544.562	-297.716	-89.1335	143.116	-212.697	-140.869	-452.337	14.5542	75.1622	-165.269	11.2772	81.1024	93.5345	-18.3793	-18.8107	-101.773	-39.6375	-54.5143	-121.564	77.6362
27.7947	23.7651	-162.261	67.8975	92.7274	58.3478	-89.1553	166.994	-177.786	-77.8676	30.3822	170.196	119.767	-86.4113	-2.55664	35.917	-310.028	-393.784	62.3159	14.9404	98.5309	-220.055	-395.54	-48.8535	-164.966	164.146	-58.7482	-71.2554	6.45984	-544.85	-295.968	-91.5121	143.026	-213.832	-141.541	-453.017	15.825	74.7534	-165.41	10.4601	80.6757	92.9684	-18.2244	-17.6904	-102.805	-39.0538	-55.543	-121.059	78.2009
26.3378	25.3534	-163.443	67.8123	91.842	58.1821	-89.1694	167.444	-178.846	-76.8391	29.8737	171.133	118.772	-86.2799	-3.35828	35.03	-310.983	-394.397	61.3445	14.6927	98.2063	-220.217	-395.451	-49.48	-165.685	163.527	-58.3275	-71.6301	6.4696	-544.781	-295.086	-92.7523	142.929	-214.961	-142.336	-453.522	17.7955	74.6893	-165.67	10.0415	79.1453	92.79	-18.3523	-16.3535	-103.477	-39.3013	-56.989	-120.244	78.9591
25.3942	24.9022	-164.603	68.2991	91.0853	57.782	-89.394	168.082	-179.612	-75.6715	29.5054	172.539	117.459	-86.043	-3.73743	33.9098	-311.032	-395.059	60.906	13.8036	98.1403	-220.747	-395.857	-50.6948	-166.305	162.831	-58.0321	-72.2986	5.95813	-543.799	-294.463	-93.422	143.134	-216.625	-143.677	-455.98	18.4515	74.6696	-166.153	9.00256	77.7036	92.4052	-17.448	-15.3188	-104.299	-39.6847	-57.7144	-119.658	79.9551
24.88	23.9371	-165.492	68.4674	90.3563	57.7346	-89.8076	168.539	-180.975	-74.5922	29.3103	174.09	116.46	-86.0237	-3.57727	33.1981	-312.028	-396.15	60.8197	12.8973	98.0344	-221.106	-396.329	-51.2665	-166.564	162.348	-57.2958	-72.5182	5.76538	-542.805	-293.682	-94.0021	143.36	-217.596	-144.62	-457.607	18.8387	74.7307	-166.314	8.24829	77.4777	91.9197	-16.7505	-14.7177	-105.385	-40.005	-58.5601	-119.175	80.5865
24.2906	25.0278	-165.853	69.0804	89.7638	57.2123	-90.2307	169.222	-181.936	-72.9677	29.2815	174.232	115.588	-85.7856	-3.4375	32.8092	-312.773	-397.258	60.3391	12.7312	98.1117	-221.985	-396.972	-52.3021	-166.812	161.954	-56.6597	-72.4194	5.42847	-542.605	-292.325	-94.871	143.434	-219.123	-146.166	-458.214	19.5531	74.691	-166.571	7.81555	76.9202	91.3855	-14.7168	-12.3691	-106.68	-41.0662	-59.2502	-118.388	81.2463
23.9452	25.5077	-167.232	69.3284	89.4235	56.6428	-90.9624	169.91	-182.802	-72.0442	29.2645	174.747	114.154	-85.6621	-3.35864	32.5437	-313.192	-398.294	59.7493	11.7451	98.2112	-222.646	-397.667	-52.4076	-167.717	161.369	-55.9126	-72.2374	4.86853	-542.228	-291.819	-96.097	143.666	-220.172	-146.648	-458.636	21.6291	74.6741	-166.767	7.53125	74.7633	91.5061	-13.7581	-11.3268	-107.196	-42.7778	-59.9685	-117.097	81.6071
23.7115	26.05	-168.39	69.4144	89.1572	55.5813	-91.453	170.221	-183.741	-71.2466	29.3833	175.844	112.749	-85.5824	-3.30835	32.6356	-312.926	-398.726	58.8549	10.9647	98.2655	-223.157	-398.807	-52.8911	-169.638	160.9	-55.2101	-72.0184	4.29419	-541.743	-290.398	-97.1626	143.627	-220.842	-147.683	-459.224	23.9736	74.6553	-166.487	6.67151	73.2296	91.5331	-12.761	-10.7797	-108.553	-44.0265	-60.8182	-116.183	81.8129
22.8704	26.37	-169.396	69.7235	88.7966	54.6406	-91.9701	171.284	-184.555	-69.5565	29.6989	176.68	111.459	-85.4939	-3.24146	32.8367	-311.209	-398.147	58.3674	9.95618	98.2975	-224.149	-399.248	-53.1553	-170.444	160.728	-54.8661	-72.0216	4.40906	-542.291	-290.13	-97.9957	143.893	-220.774	-149.052	-460.09	24.6005	75.0156	-166.176	6.24219	73.2053	91.5847	-13.0288	-10.1739	-108.941	-45.7786	-61.9473	-115.421	82.9277
22.3512	27.1412	-170.213	70.1764	88.8219	54.0865	-92.3165	171.74	-185.302	-68.4008	30.0662	177.363	110.763	-85.5996	-3.49951	33.2301	-310.225	-398.841	58.3044	9.13794	98.1472	-224.745	-398.389	-53.5917	-170.756	160.245	-54.2081	-72.0054	4.07471	-542.862	-289.556	-98.9579	143.95	-220.687	-149.344	-460.595	25.5422	75.3297	-165.813	5.78223	72.8203	90.8898	-13.4342	-9.75146	-110.768	-47.1742	-62.9429	-114.736	84.6174
21.6537	28.1129	-171.118	70.4059	89.1587	53.9229	-92.6543	172.268	-186.02	-67.7474	31.0594	177.634	110.002	-85.7122	-4.02661	33.9143	-308.988	-399.426	58.2264	8.59839	97.0256	-225.49	-398.578	-54.6702	-171.301	159.624	-53.9735	-72.031	3.7533	-543.892	-288.905	-99.7333	144.029	-220.668	-150.111	-461.288	27.6267	75.7781	-165.549	5.89221	72.7079	91.4521	-13.6652	-8.79858	-111.064	-48.8407	-63.5851	-113.962	86.65
21.2799	29.0005	-173.465	70.877	89.3999	53.4695	-92.8022	173.004	-186.902	-67.0441	31.6045	177.722	108.798	-85.5469	-4.3855	34.7317	-307.736	-399.926	57.9983	7.92615	96.2756	-226.341	-399.606	-55.4559	-171.801	159.223	-53.808	-71.4425	3.35327	-544.049	-287.962	-101.806	144.075	-220.726	-151.042	-462.151	29.14	76.2627	-165.423	5.41284	72.406	91.5068	-13.7766	-8.96313	-110.766	-50.7887	-63.8879	-113.451	87.3094
21.3881	29.3551	-174.495	71.6036	89.5726	53.1627	-92.9125	173.287	-188.143	-66.4102	31.9736	177.747	107.049	-85.6233	-4.78821	35.1512	-306.254	-400.363	57.9479	6.59058	95.8112	-227.03	-400.297	-55.8402	-172.266	158.822	-53.6998	-70.9261	3.16357	-544.28	-286.607	-102.921	144.03	-220.514	-152.988	-462.303	30.4181	76.9988	-165.482	4.31531	72.3395	91.5162	-13.7744	-9.03125	-110.473	-53.0001	-64.4445	-113.128	87.1934
21.3577	30.0237	-175.556	72.3624	89.8894	53.0063	-92.9757	173.401	-189.107	-65.9069	32.59	177.668	106.521	-85.9221	-4.75842	35.7068	-305.357	-400.464	57.7129	5.60657	94.5016	-228.221	-401.201	-56.4651	-172.626	158.611	-53.8263	-70.587	3.26172	-545.117	-286.572	-103.597	144.055	-220.16	-154.316	-462.51	30.7388	77.0643	-165.512	3.10645	72.1783	91.6088	-13.713	-10.5176	-109.632	-54.015	-65.5143	-112.248	87.6443
21.6052	31.1804	-176.908	72.4305	89.6218	51.5923	-92.9557	173.655	-189.789	-65.2355	32.8948	177.679	105.944	-86.2019	-4.62	36.5289	-305.392	-400.855	57.3978	3.78198	93.0143	-229.008	-402.014	-56.6882	-172.906	158.529	-53.6558	-69.9403	3.32104	-544.573	-286.614	-104.431	144.099	-219.69	-154.893	-462.515	31.1587	77.318	-165.223	2.03235	72.3115	91.448	-13.601	-11.579	-108.955	-54.3739	-66.7031	-110.99	87.8214
21.3745	31.381	-177.734	72.7745	89.4152	51.2529	-92.8684	173.96	-190.654	-64.4548	33.9982	177.597	104.737	-86.7599	-4.54553	37.8278	-305.858	-400.988	57.2869	2.89453	92.6346	-231.717	-402.986	-56.0535	-173.536	158.006	-54.088	-69.1265	3.41089	-544.042	-287.05	-105.439	144.235	-218.41	-156.03	-462.413	32.2206	77.3542	-164.983	0.747681	72.4402	91.0723	-13.5554	-12.3619	-108.543	-56.0046	-67.0548	-110.438	89.2306
21.03	32.0376	-178.95	73.2036	88.7854	50.1985	-92.4189	174.352	-191.446	-64.0398	34.4822	177.57	103.527	-87.2891	-4.49609	38.5747	-306.076	-400.959	56.8199	2.06567	90.9188	-233.119	-404.111	-56.3756	-174.323	157.81	-54.0259	-69.1393	3.6792	-543.819	-286.847	-106.392	144.382	-217.514	-157.721	-462.539	32.7419	77.394	-164.369	0.59082	72.6438	90.7244	-13.4899	-13.4229	-108.385	-57.5616	-67.7217	-110.535	91.9178
20.5525	33.6344	-180.019	73.2007	88.4866	49.5319	-92.1519	174.522	-192.479	-63.801	35.4567	177.737	103.926	-87.7572	-4.49854	39.6223	-306.147	-399.329	56.4948	0.930298	90.4419	-233.95	-405.18	-56.3704	-174.615	157.885	-54.0363	-69.6035	4.05933	-543.922	-286.901	-107.254	144.432	-216.929	-159.265	-462.759	34.6355	77.9071	-164.135	0.411377	72.9429	90.3438	-13.2036	-13.879	-108.428	-58.0986	-68.2236	-110.984	92.1818
20.1201	34.3057	-181.895	73.2915	88.3772	48.906	-91.8044	174.837	-193.347	-63.5171	36.1547	177.654	104.849	-88.6024	-4.58386	41.3499	-306.286	-397.668	55.7598	-0.15979	89.2875	-235.185	-406.009	-56.3483	-175.017	157.814	-54.2478	-70.1801	4.82739	-544.243	-287.054	-108.013	144.564	-216.467	-159.893	-462.908	36.6348	78.2059	-163.825	-1.18201	73.1471	90.2783	-13.0297	-13.9392	-107.977	-58.3038	-68.8326	-111.647	92.1036
19.4708	34.8151	-182.35	73.3324	88.3636	48.4908	-91.5754	175.36	-194.255	-63.2551	36.5227	177.598	105.113	-89.3774	-4.85803	42.9041	-306.409	-396.37	55.6527	-1.58643	87.8154	-236.626	-406.099	-56.3336	-175.233	157.708	-54.3658	-71.6871	5.46985	-544.837	-287.219	-108.618	144.728	-215.073	-161.335	-462.97	38.0229	78.3729	-163.76	-2.13696	73.4567	89.9606	-13.3314	-13.7275	-107.979	-56.9659	-70.5748	-114.249	92.1051
19.5524	35.7015	-182.583	73.4008	88.9009	48.1342	-91.1254	175.773	-194.909	-63.0125	37.6204	177.442	104.255	-89.5834	-5.12805	43.6873	-306.433	-395.937	55.5778	-2.98071	87.2313	-237.817	-406.554	-56.046	-175.41	157.751	-54.5364	-72.6271	5.87354	-545.355	-287.461	-109.008	145.056	-214.631	-162.508	-463.122	38.3398	78.9329	-163.631	-3.22449	73.6454	89.1251	-13.4165	-13.7045	-108.45	-55.4729	-71.1796	-115.493	91.9734
20.3058	36.4271	-183.396	73.4055	89.3772	47.6489	-90.3422	176.032	-195.569	-63.0981	37.7273	177.15	104.111	-90.3073	-5.19214	45.4724	-306.404	-395.177	55.656	-3.43616	86.0875	-238.972	-407.976	-55.5754	-175.514	157.786	-54.6802	-72.9025	6.44446	-545.721	-287.329	-109.302	145.502	-214.594	-163.14	-463.431	38.7194	79.4034	-163.506	-3.56616	73.5496	88.6005	-13.3689	-13.6829	-108.269	-52.9568	-72.1669	-116.932	92.0864
20.859	37.6755	-184.683	73.3081	89.7843	47.4037	-88.624	176.282	-196.812	-63.1932	38.2902	177.176	103.045	-90.8806	-5.49951	47.4651	-306.597	-393.46	55.7194	-4.1095	85.2745	-239.985	-408.861	-54.9462	-175.382	157.849	-54.8585	-73.9092	6.21289	-546.331	-287.743	-109.242	145.938	-214.366	-164.173	-463.36	39.123	79.903	-163.413	-4.24146	73.6937	87.8647	-13.7776	-13.9155	-107.456	-52.0852	-73.0092	-117.812	92.1656
21.3373	38.3757	-185.577	73.1018	90.0315	47.1777	-88.1824	176.225	-197.527	-63.5876	38.5872	177.089	102.517	-92.1248	-5.54675	48.396	-307.096	-392.455	55.9984	-5.42273	84.7252	-241.288	-409.675	-54.4015	-175.903	157.581	-55.1671	-75.526	6.94141	-546.57	-288.015	-108.732	146.308	-214.434	-164.734	-463.027	40.3713	80.5726	-163.415	-4.64014	73.9297	87.428	-14.0905	-14.67	-107.128	-50.9612	-74.157	-118.95	90.6298
20.8079	38.854	-184.778	73.0223	89.9219	46.9167	-87.8988	176.017	-198.178	-64.3754	38.9294	176.989	101.874	-92.8212	-5.59583	49.7484	-308.932	-391.555	56.316	-6.39673	84.3368	-243.011	-410.238	-53.5823	-176.215	157.367	-55.4597	-77.0896	7.55713	-546.951	-289.06	-107.802	146.855	-214.503	-166.259	-462.491	40.6281	80.4459	-163.258	-5.85388	74.1819	86.5573	-14.6602	-15.4805	-105.944	-50.6337	-74.817	-120.825	90.1547
20.3391	38.7991	-183.609	73.0526	89.6986	46.8267	-87.6392	175.573	-198.877	-65.7711	39.0774	176.73	100.869	-93.6592	-5.5896	50.9827	-309.693	-391.324	56.8334	-6.80896	83.9766	-244.273	-411.678	-52.6011	-176.249	157.194	-55.514	-78.1843	7.78357	-547.728	-290.23	-107.138	147.146	-214.513	-167.391	-462.262	41.1172	80.3817	-162.883	-5.61646	74.4717	86.0391	-15.3586	-15.9617	-104.708	-50.3546	-75.8021	-122.494	89.424
20.062	38.9023	-181.875	73.2975	89.5171	46.8448	-87.1857	175.235	-199.611	-67.1487	38.7211	176.466	100.62	-93.9347	-5.60547	52.9519	-311.281	-391.275	57.0262	-7.98608	83.0422	-245.619	-413.802	-51.9182	-176.423	157.052	-55.3784	-78.4514	6.87524	-548.471	-290.901	-105.765	147.138	-214.402	-167.29	-462.188	41.2223	80.1357	-162.126	-6.4502	74.8824	85.7424	-15.9282	-16.0674	-104.189	-50.0026	-77.132	-122.964	90.437
20.079	39.1245	-180.629	73.272	88.9231	46.7228	-86.7672	174.54	-200.698	-68.6116	38.3794	176.263	99.8467	-95.4198	-5.55688	53.7313	-312.45	-390.862	56.9106	-9.90601	81.8024	-246.056	-414.524	-51.3739	-176.47	156.613	-55.2416	-78.873	5.59937	-549.336	-291.076	-104.965	147.169	-214.491	-165.63	-461.697	41.2245	80.0117	-162.085	-5.67151	75.1195	85.4259	-16.3678	-16.3438	-105.167	-50.026	-77.6704	-123.129	91.4141
19.8707	39.4142	-179.417	73.4828	88.3285	46.5924	-86.3933	173.689	-201.344	-70.3176	38.2251	176.003	98.8898	-97.2594	-5.51331	54.5776	-313.853	-390.714	57.1737	-10.4419	81.1809	-246.548	-414.99	-51.4175	-176.631	156.04	-55.3438	-80.3663	4.98145	-549.677	-291.384	-104.821	147.36	-214.739	-163.975	-461.471	41.515	79.7297	-161.764	-5.58655	75.8767	84.6158	-16.608	-17.3696	-105.554	-50.3702	-78.1521	-120.685	91.4849
19.7344	39.6169	-177.667	73.6429	87.5284	46.5596	-86.3616	173.23	-201.36	-71.5131	37.9546	175.884	98.1461	-97.5978	-5.57983	55.6509	-314.675	-391.068	57.7612	-10.6044	80.762	-247.54	-416.129	-51.973	-176.558	155.451	-55.486	-80.6581	4.45789	-550.756	-293.515	-104.59	147.59	-214.992	-163.151	-461.223	41.9417	79.6765	-161.352	-5.93591	76.282	84.4258	-16.5908	-18.249	-105.524	-50.7833	-78.3289	-118.737	92.2365
19.7114	39.6664	-176.165	73.889	87.2396	46.641	-86.7205	172.392	-201.247	-72.569	37.5327	175.515	97.5835	-98.1642	-5.51135	56.4957	-315.597	-391.338	59.0089	-11.5629	80.5135	-248.442	-418.411	-52.7821	-176.575	154.773	-56.1984	-81.8024	3.57068	-551.279	-294.576	-104.058	147.556	-215.138	-161.851	-461.007	42.2682	79.1764	-160.748	-6.50073	76.4447	84.0265	-16.6188	-18.6304	-105.683	-50.7804	-78.8109	-118.248	93.532
19.8802	39.73	-175.112	74.3146	86.6775	47.1722	-87.1157	171.547	-201.057	-73.3718	37.1594	175.35	97.1737	-98.941	-5.03601	57.6896	-317.297	-391.75	60.3333	-13.3331	80.1403	-249.855	-418.92	-53.2968	-176.691	153.787	-56.726	-82.5039	3.58838	-552.713	-295.604	-103.17	147.725	-214.924	-160.94	-460.59	42.7391	78.2063	-160.744	-6.65295	76.674	85.4335	-17.6195	-19.417	-104.425	-50.3967	-79.0836	-117.674	93.8435
20.0782	39.7163	-174.196	74.8097	85.6636	47.5601	-88.0554	170.537	-201.89	-74.6984	37.2759	175.044	96.7758	-99.6337	-4.67383	57.9263	-319.482	-391.959	60.7393	-14.6388	79.8442	-250.936	-419.423	-54.0552	-176.639	153.029	-56.8822	-82.7845	3.19592	-555.362	-295.851	-102.84	147.671	-214.532	-160.027	-460.657	43.2117	77.4663	-160.715	-6.87451	76.7699	87.2528	-19.0142	-20.1891	-102.593	-50.2852	-79.4646	-117.092	94.3629
20.4541	39.9067	-172.599	75.0236	85.0354	47.8641	-88.8622	170.173	-202.602	-75.5234	36.2527	174.916	96.0587	-100.468	-4.06079	58.7867	-319.959	-392.075	60.9297	-15.1642	79.3685	-251.68	-421.223	-55.8735	-176.432	152.004	-57.4368	-82.6462	2.55762	-557.592	-296.607	-102.775	147.383	-214.117	-159.485	-460.991	44.1389	77.9833	-160.219	-7.02393	76.9427	87.4259	-20.1	-21.4535	-101.494	-50.2637	-79.5562	-115.954	94.6178
20.5474	40.1584	-170.844	75.1426	84.6445	47.9674	-89.7253	169.746	-203.314	-76.6478	35.3225	174.606	95.5613	-100.986	-2.94507	59.4242	-321.153	-392.735	61.178	-15.5996	79.3868	-252.096	-422.896	-56.5784	-176.267	150.609	-57.8074	-82.3425	2.48499	-558.194	-297.537	-102.88	147.341	-213.455	-158.532	-461.473	44.541	78.8538	-159.989	-7.38806	77.3345	88.2092	-20.9711	-22.0536	-101.079	-50.1437	-79.3693	-113.924	94.8572
20.5076	40.4268	-170.103	75.5	84.179	47.7936	-89.601	170.661	-203.87	-77.7595	34.2675	174.359	95.0625	-101.107	-2.17554	60.5834	-322.663	-393.915	61.0536	-16.171	79.0182	-252.271	-423.494	-57.3274	-176.024	150.228	-59.104	-81.6334	2.38196	-559.946	-297.899	-102.863	147.121	-212.775	-158.06	-461.76	44.881	80.5349	-159.503	-7.77966	78.0593	88.8461	-21.2716	-23.1342	-99.5256	-49.8201	-79.5753	-114.047	94.6515
20.4197	40.4933	-169.412	75.7195	83.4808	47.6161	-89.7405	171.338	-204.293	-78.3046	33.4473	174.151	93.9272	-101.239	-1.5249	61.5123	-324.044	-394.878	61.1002	-17.3419	78.9691	-252.157	-423.842	-58.1652	-175.974	149.753	-60.162	-81.0867	2.55347	-562.704	-299.451	-102.018	146.577	-212.148	-158.38	-462.21	45.0426	80.6918	-158.5	-8.20703	78.4929	88.8888	-21.2358	-23.5455	-98.22	-49.6396	-79.6931	-113.69	94.4156
20.4236	40.5761	-168.95	76.0774	82.9943	47.2467	-89.9379	171.805	-204.981	-78.7333	32.5172	173.817	93.1117	-101.293	-1.05945	62.4442	-324.875	-395.75	61.2698	-18.7256	78.6943	-252.309	-425.105	-59.5026	-175.977	147.819	-60.5419	-80.2838	2.80798	-563.362	-300.265	-101.317	146.789	-212.119	-158.766	-463.086	45.2046	80.6361	-158.475	-8.90637	78.7687	88.6891	-20.1105	-25.1907	-96.7485	-49.4923	-79.6042	-113.541	92.459
20.4708	40.7018	-168.311	76.0929	82.6508	46.7322	-89.8767	171.027	-206.451	-78.8657	31.8667	173.589	92.5995	-101.44	-0.712524	64.5576	-326.655	-396.347	61.567	-18.408	78.2831	-253.292	-426.958	-60.6436	-176.182	146.318	-61.0693	-79.4713	2.98633	-564.524	-302.359	-101.128	146.813	-212.667	-159.148	-463.778	45.1461	80.6355	-157.897	-9.3479	78.7808	88.4712	-17.5702	-26.8738	-95.8192	-49.1418	-79.7789	-113.495	90.6277
20.4984	40.8427	-167.568	76.3727	82.373	46.1259	-89.9631	170.611	-207.917	-78.8186	30.8591	173.141	92.2324	-101.443	-0.392334	65.9088	-327.178	-397.917	61.9083	-18.9484	77.8868	-253.824	-427.521	-61.3607	-176.571	145.26	-61.1233	-79.717	3.09485	-566.747	-302.607	-101.175	146.72	-213.338	-159.32	-464.125	44.7511	80.6218	-156.183	-9.8064	78.9072	88.1526	-16.0598	-28.735	-95.1161	-48.8672	-79.9094	-113.546	89.7562
20.4489	40.7302	-166.466	76.9065	82.1926	45.37	-89.9869	170.606	-208.442	-79.0222	30.3679	173.018	91.3264	-101.246	-0.57312	67.0566	-328.478	-398.971	62.3154	-19.738	77.2029	-254.982	-427.936	-60.9644	-177.181	144.422	-61.0903	-80.0259	3.15723	-568.698	-303.649	-100.986	146.686	-214.304	-159.557	-464.363	44.0554	80.3472	-154.887	-10.8717	79.1388	87.9655	-15.5359	-29.3953	-94.5183	-48.922	-80.0388	-113.558	89.5732
20.2679	40.5273	-165.189	77.0304	81.7441	44.939	-89.8499	171.005	-209.185	-79.4948	29.9358	172.992	90.1152	-101.231	-0.535645	67.8429	-329.6	-399.876	62.9287	-20.3809	76.0836	-255.448	-428.677	-61.1331	-177.569	143.861	-61.501	-80.8149	3.4762	-569.006	-305.313	-100.807	146.592	-215.054	-159.54	-464.945	43.2845	79.7872	-154.191	-11.6477	79.6061	87.8173	-14.9727	-30.6169	-92.5339	-48.5768	-80.8796	-113.545	88.9552
20.1407	40.2996	-164.396	77.1868	81.1245	44.6942	-89.6304	171.116	-210.078	-79.9027	28.8429	172.927	89.2833	-100.922	-0.642456	69.5619	-331.429	-401.778	63.364	-21.4072	75.0159	-255.981	-430.393	-62.2942	-178.155	141.72	-61.6583	-81.0563	3.42151	-570.179	-306.585	-100.588	146.27	-216.137	-159.544	-465.407	43.2627	79.3761	-153.171	-12.8787	79.5933	87.6277	-14.6067	-32.4113	-91.3916	-47.9675	-81.5341	-113.547	88.1193
20.0641	39.7939	-164.5	77.5041	80.7725	44.7269	-89.4352	171.451	-211.633	-80.6913	27.9941	172.823	88.2067	-100.328	-0.734375	71.8015	-332.59	-402.968	63.3092	-22.1154	74.4138	-256.249	-431.063	-63.338	-178.39	140.184	-61.7876	-81.6019	3.4408	-572.871	-306.882	-100.433	146.233	-217.094	-159.646	-465.534	42.8254	79.2	-151.216	-13.9696	79.7581	87.6399	-14.4812	-33.5189	-90.1499	-47.7853	-82.3544	-113.604	87.8755
19.9836	39.3682	-164.249	78.2439	80.332	44.6908	-89.127	171.843	-213.411	-81.3311	27.8197	172.395	87.2441	-100.12	-0.838257	72.7173	-334.814	-403.337	63.322	-22.0374	73.0474	-256.735	-431.926	-63.1656	-178.912	139.321	-61.9296	-82.1151	3.41272	-574.539	-307.943	-100.185	146.318	-218.774	-159.719	-465.75	42.9769	78.7919	-150.634	-15.0286	80.9402	87.7994	-13.7878	-34.8746	-90.516	-47.098	-82.2887	-113.626	87.9423
19.8918	39.0903	-163.917	78.6282	80.0457	44.5129	-88.5215	172.931	-214.635	-81.926	28.1017	171.987	86.5284	-99.7538	-0.620483	73.7919	-335.332	-404.3	63.4746	-22.4305	72.543	-257.229	-432.45	-63.4956	-180.004	138.608	-62.0018	-82.2854	3.71631	-574.259	-308.641	-100.145	146.344	-219.584	-160.483	-466.167	42.4728	78.222	-149.218	-16.6168	81.4631	88.0394	-13.4506	-34.912	-93.0464	-46.808	-82.5673	-113.517	87.9402
19.7301	38.5139	-163.845	79.0023	79.9974	44.4716	-88.153	173.643	-215.117	-82.1091	28.0652	171.613	86.0115	-99.0494	-0.425049	75.2849	-336.11	-404.84	63.5042	-23.0861	71.4059	-257.564	-434.399	-64.2007	-181.079	137.692	-62.1515	-82.4786	3.5575	-576.036	-310.965	-100.03	146.354	-220.721	-162.112	-466.529	41.967	77.3458	-147.585	-17.6622	82.6764	88.1594	-13.5055	-35.1932	-94.7703	-46.697	-82.829	-113.623	87.985
19.6348	37.9882	-164.135	79.203	80.1429	44.3527	-87.8834	174.166	-215.637	-82.5175	27.6324	171.464	85.5121	-97.3539	-0.670532	77.4039	-337.427	-405.541	63.6429	-24.2084	69.8306	-258.145	-435.614	-64.6624	-182.664	135.79	-62.3292	-82.4535	3.72998	-578.561	-311.482	-99.8041	146.275	-222.247	-163.025	-467.082	41.163	76.984	-146.989	-18.2098	84.1971	88.0695	-13.7791	-36.8092	-96.0505	-46.6547	-83.1664	-114.856	88.1219
19.6962	37.2463	-164.407	79.5897	80.3173	44.2991	-87.5264	175.267	-216.673	-82.7527	27.4562	171.031	84.8914	-96.0582	-0.861938	78.7874	-339.132	-405.933	63.7954	-24.7257	68.8014	-258.712	-436.174	-64.9589	-183.147	134.64	-63.2567	-82.6324	3.88611	-579.799	-312.255	-99.6632	146.188	-223.217	-163.79	-468.457	40.4376	76.8594	-146.208	-20.1337	86.2021	88.0885	-13.9464	-38.031	-97.704	-46.1282	-83.7593	-116.67	88.1947
19.8224	36.8387	-164.561	79.7803	80.6487	44.396	-87.1416	176.322	-217.983	-83.2323	27.1808	170.805	84.3865	-95.3336	-1.29431	79.6698	-339.85	-406.463	63.822	-24.7423	68.4775	-259.294	-436.711	-65.324	-183.969	134.035	-64.2222	-82.6146	3.97229	-580.165	-313.534	-99.2361	146.265	-224.123	-164.688	-469.812	39.5928	77.225	-144.395	-20.8965	87.0806	88.1602	-14.1971	-37.8116	-98.2729	-45.7469	-84.4469	-117.262	88.3308
20.0336	36.1965	-164.474	79.9465	80.838	44.4918	-86.8431	177.668	-218.939	-83.6066	26.9462	170.394	84.0792	-95.1279	-1.64929	80.0317	-340.37	-407.48	63.811	-25.0168	67.9302	-260.363	-438.269	-65.7357	-185.618	132.54	-64.858	-82.6213	4.23975	-580.709	-314.906	-98.9884	146.253	-225.787	-165.339	-471.318	39.3956	77.4147	-143.109	-21.4232	87.6407	88.0853	-14.4413	-36.1553	-98.4341	-45.4762	-84.4735	-118.628	88.3589
20.1929	35.6343	-165.669	79.8916	81.37	44.6624	-86.5996	179.142	-219.53	-84.1096	26.2555	169.96	83.1954	-94.2489	-2.78186	81.7721	-340.93	-407.86	63.8334	-25.1744	67.1028	-261.303	-439.578	-66.4186	-187.032	131.915	-65.1606	-82.4498	4.51904	-582.375	-316.016	-98.8622	146.254	-227.116	-166.716	-474.189	39.3422	77.3541	-142.374	-22.2649	88.6072	88.5222	-14.3838	-34.6486	-97.9868	-44.9537	-85.0209	-119.781	88.3843
20.2448	35.1108	-166.478	79.816	82.0543	44.3711	-86.4679	179.873	-219.703	-84.958	25.8331	169.73	82.424	-92.6868	-3.41162	83.4189	-341.676	-408.673	63.9685	-24.5229	66.8386	-262.392	-440.513	-66.9905	-187.04	131.269	-65.3584	-82.329	4.74695	-583.964	-316.914	-98.6359	146.391	-227.836	-167.214	-475.294	39.3125	77.5795	-141.457	-22.9236	90.0267	88.3729	-14.6027	-33.7936	-97.9027	-44.2301	-85.377	-121.211	88.2406
19.8074	34.8973	-167.694	79.788	82.1531	44.03	-86.2845	180.624	-220.434	-85.4952	25.5947	169.298	81.7178	-91.5806	-4.93335	84.2944	-342.591	-409.559	63.9835	-24.8889	66.1401	-263.09	-441.02	-67.2803	-187.495	130.861	-65.6364	-81.9376	4.71313	-585.995	-317.287	-98.5198	146.336	-228.165	-168.067	-477.422	39.2799	77.4186	-140.713	-23.1091	90.4641	88.7399	-15.4972	-31.9476	-98.1069	-43.4449	-85.9623	-121.906	87.9277
19.7769	34.9094	-169.441	79.7788	82.5228	43.8209	-85.9669	181.021	-221.312	-86.0796	25.5109	169.011	81.1763	-90.8363	-6.21753	84.9543	-343.184	-409.944	63.9847	-24.6505	66.2679	-264.887	-442.25	-67.8329	-187.921	130.725	-66.3378	-81.8104	4.60229	-586.994	-318.605	-98.3956	146.351	-228.555	-168.904	-479.08	38.7415	77.5253	-138.806	-24.7457	90.7809	89.6887	-15.7452	-31.0291	-98.2734	-42.9255	-87.0231	-122.65	87.3224
19.5189	34.906	-170.601	79.9175	83.5907	43.7633	-85.7355	181.8	-222.713	-86.8081	25.2151	168.762	80.3429	-90.244	-6.68054	85.382	-343.908	-410.968	64.0262	-24.7362	66.2201	-266.965	-444.09	-68.5293	-190.747	130.457	-66.9594	-81.8102	4.56763	-587.939	-320.056	-98.1611	146.359	-229.877	-170.674	-480.457	38.1884	77.2461	-137.378	-24.8043	91.1271	90.2308	-16.4266	-30.9188	-98.7616	-43.0065	-87.5026	-122.902	86.6281
19.2297	34.8434	-171.219	80.2567	84.3156	43.833	-85.4778	182.554	-223.235	-86.7428	24.6593	168.453	79.4052	-89.9225	-8.0603	85.8434	-344.299	-412.938	64.0348	-24.5394	66.2925	-267.73	-445.462	-69.2534	-191.991	130.001	-67.6083	-81.8611	4.69482	-588.385	-321.13	-97.9628	146.557	-230.757	-171.661	-481.403	37.4349	76.9562	-136.686	-25.3409	91.832	90.9406	-16.965	-30.5004	-99.5242	-43.2268	-87.578	-122.653	85.9143
19.0269	34.5812	-172.815	80.4993	84.7642	43.7811	-85.3944	183.225	-223.507	-86.6005	23.6056	167.866	78.7162	-89.6925	-8.23242	86.3488	-346.162	-413.974	64.0966	-24.6423	66.418	-268.946	-446	-70.1217	-192.125	129.957	-67.8308	-81.8942	4.79175	-589.482	-322.294	-97.9623	146.602	-231.106	-172.239	-482.887	37.2211	76.6201	-136.365	-24.002	91.9618	91.7053	-17.9437	-30.438	-100.136	-42.3395	-88.5004	-121.801	85.5443
18.8193	34.1338	-173.633	80.5596	85.0936	43.4668	-85.3762	183.655	-224.664	-86.6224	23.2875	167.402	77.5907	-89.4497	-8.67175	86.5392	-346.556	-415.232	64.1655	-25.0181	66.4963	-269.701	-446.74	-70.4352	-192.465	129.85	-68.2549	-82.5994	4.90308	-590.196	-323.383	-98.2981	146.677	-232.218	-172.89	-484.085	37.0216	75.8198	-135.575	-22.6335	92.1309	92.8053	-19.592	-30.2397	-100.974	-40.8921	-89.8616	-120.756	85.3768
18.7559	33.9333	-174.739	80.5238	85.2528	43.0973	-85.368	183.709	-226.205	-86.7903	22.9086	167.088	76.6268	-89.3109	-9.24939	86.3959	-346.166	-416.803	64.2103	-25.147	66.7148	-271.323	-447.642	-71.3058	-192.937	130.29	-69.1089	-83.074	5.22949	-590.522	-325.115	-98.8684	146.626	-231.78	-174.654	-484.817	36.4375	75.3898	-134.804	-21.5394	92.1222	92.7169	-20.5028	-29.9042	-102.586	-39.6071	-90.0908	-120.437	85.0753
18.8048	33.9617	-175.341	80.9535	85.182	42.9617	-85.3893	183.702	-225.012	-86.8435	22.3094	166.804	75.3575	-89.0023	-9.66821	86.0587	-345.11	-417.962	64.228	-25.7903	67.186	-272.67	-448.784	-72.0901	-193.508	130.793	-69.4855	-83.8789	5.53259	-590.902	-326.11	-99.2087	146.751	-231.494	-176.595	-485.935	36.3246	75.6952	-134.323	-19.4607	92.4652	92.6121	-22.0514	-30.019	-103.227	-38.1249	-90.3516	-119.715	84.7399
18.9557	33.7271	-176	81.4398	84.8826	42.9366	-85.5745	183.54	-223.333	-86.7303	21.8862	166.697	74.6194	-88.7063	-9.97815	85.9536	-344.503	-418.974	64.1958	-26.0986	67.3513	-273.908	-450.775	-72.6213	-195.452	131.533	-69.847	-84.5641	6.21448	-593.022	-326.577	-99.7775	146.825	-231.923	-176.291	-486.655	36.3104	75.7719	-133.858	-18.9565	92.6724	93.4918	-22.8296	-29.8129	-103.908	-37.2966	-90.6937	-118.668	83.9594
19.1095	33.5865	-176.347	82.2064	84.9572	42.9467	-85.7531	183.436	-222.394	-86.746	21.7703	166.604	73.9219	-88.182	-10.1893	85.2032	-343.918	-419.339	64.1846	-26.6967	67.3864	-275.011	-451.409	-73.42	-196.082	132.854	-70.3225	-85.4014	6.83301	-594.328	-327.376	-100.513	145.747	-231.591	-176.105	-487.619	36.1278	75.4739	-132.513	-17.7589	92.8765	94.6201	-23.4736	-29.191	-104.921	-36.8005	-91.2845	-117.673	82.9249
19.524	32.969	-177.145	83.6251	84.8169	42.6913	-86.3175	183.236	-221.311	-86.8206	21.5503	166.688	73.1813	-87.7401	-10.4811	84.2621	-343.887	-420.315	64.2141	-27.6202	67.4485	-276.906	-452.873	-73.8503	-196.552	133.673	-70.5363	-86.5565	7.1051	-596.811	-329.056	-100.773	145.009	-231.374	-175.735	-488.015	36.0642	75.1901	-133.328	-17.9196	93.0607	96.1201	-24.1353	-28.7107	-106.439	-36.5177	-92.024	-117.075	82.7314
19.8694	31.629	-178.125	84.6488	84.4264	42.5085	-87.5205	182.834	-220.15	-86.8232	21.0887	166.539	72.8848	-87.4532	-10.5266	83.6567	-344.065	-421.536	64.2157	-28.1139	67.4475	-278.238	-454.728	-74.0431	-197.233	133.345	-70.5657	-87.4058	7.94287	-598.636	-330.937	-101.281	144.069	-229.497	-176.311	-487.906	35.9104	74.8921	-134.56	-17.8972	93.3871	97.366	-24.3342	-28.5652	-107.226	-35.9594	-92.8468	-116.651	82.2211
21.1213	30.0396	-178.549	84.923	83.951	42.3639	-87.8247	182.474	-220.012	-86.7351	20.683	166.398	72.2983	-86.6218	-10.6079	83.246	-344.255	-422.733	64.1722	-28.9281	67.0204	-279.534	-455.417	-74.6215	-198.189	133.014	-70.7202	-88.1365	9.08606	-599.537	-331.198	-102.131	143.614	-228.364	-176.565	-487.952	36.2889	74.6693	-135.885	-17.9747	93.666	97.7419	-24.4938	-28.504	-107.9	-35.2793	-92.8634	-116.266	82.0627
23.0021	29.1456	-178.881	84.8806	83.1377	42.2683	-87.8287	181.187	-220.307	-86.686	20.5215	166.848	72.4346	-86.1864	-10.6921	82.8567	-344.312	-423.374	64.0295	-29.4741	66.3063	-280.61	-456.069	-74.9491	-198.84	132.675	-71.0374	-88.9397	9.48584	-599.958	-332.398	-102.633	142.768	-227.452	-176.751	-487.688	36.4058	74.3457	-137.922	-18.0737	93.7677	98.9594	-24.8298	-28.2484	-109.167	-34.5874	-93.5955	-115.922	81.5913
23.754	28.9696	-179.951	85.1234	83.2042	42.2656	-88.421	179.9	-220.346	-86.7634	20.5151	167.127	72.5194	-85.5497	-10.5797	82.8341	-344.322	-425.005	64.0978	-30.2621	65.4226	-281.692	-457.329	-75.3816	-199.839	132.867	-71.1841	-89.5613	10.4249	-600.416	-334.257	-103.178	142.31	-226.028	-177.085	-487.099	37.1926	73.9408	-138.645	-18.0183	93.567	99.6741	-24.407	-27.798	-110.472	-33.8398	-94.5852	-115.39	81.1971
24.1989	28.2296	-181.098	86.0403	82.9072	42.5839	-89.0422	179.881	-220.335	-87.0609	20.4977	167.413	72.1602	-84.6482	-10.4469	82.8661	-344.337	-426.008	63.5021	-30.9415	64.2051	-283.182	-458.609	-75.8459	-200.612	133.416	-71.2526	-90.1549	11.6895	-601.534	-335.465	-103.618	141.4	-224.862	-177.243	-486.907	37.9374	73.7616	-140.436	-17.2104	93.1429	101.11	-24.3727	-26.9464	-110.953	-33.5826	-95.1973	-115.316	81.1464
25.3734	27.6655	-182.817	87.2012	82.3578	43.2939	-89.7285	178.984	-220.581	-87.2424	20.4633	167.632	71.5	-84.0869	-9.89124	82.7452	-344.329	-426.788	62.7604	-31.4366	63.6268	-284.288	-459.66	-76.4635	-200.916	133.416	-71.3293	-90.8018	12.4137	-602.686	-335.652	-104.41	141.058	-224.389	-177.064	-486.823	37.7164	72.6079	-140.498	-16.7866	92.7434	101.711	-24.1981	-26.3513	-111.645	-33.1626	-95.4452	-115.121	81.0656
27.1057	27.0612	-183.58	87.8146	82.0548	43.4349	-90.0029	177.894	-220.76	-87.6893	20.3966	167.565	70.6362	-84.0005	-9.73206	82.1799	-343.931	-427.633	62.3187	-32.3768	63.1785	-285.415	-460.071	-77.201	-201.46	132.857	-71.365	-91.2156	13.0212	-603.487	-336.711	-104.932	140.479	-224.097	-177.003	-487.015	37.7416	72.3362	-140.859	-15.7334	91.9073	101.995	-24.1342	-25.3657	-111.887	-32.2792	-95.865	-114.478	80.9354
27.6757	25.7396	-185.336	88.6631	81.3668	43.655	-90.1909	177.22	-220.851	-88.7278	20.3207	167.78	69.8384	-84.0144	-9.16064	81.9625	-339.628	-428.747	61.7606	-32.8041	61.8032	-286.148	-460.411	-77.9424	-201.797	132.034	-71.5929	-92.7582	13.6732	-604.093	-337.851	-105.969	139.201	-223.292	-177.241	-487.528	36.4314	72.1456	-140.989	-14.8447	91.3186	101.165	-24.1311	-23.8599	-112.469	-31.5814	-96.2264	-113.848	80.9691
28.3638	24.7439	-186.509	89.2135	81.0425	44.4043	-90.2777	176.563	-220.942	-89.4768	20.0103	167.705	69.2057	-83.1941	-8.15906	81.0504	-339.956	-429.573	61.4271	-33.7937	60.7925	-287.494	-460.612	-78.7378	-202.341	131.506	-71.9629	-93.4369	14.7723	-605.877	-338.555	-106.739	139.012	-222.752	-177.185	-487.505	35.4681	71.6566	-141.003	-13.6794	91.5786	99.5731	-24.2976	-23.5985	-112.968	-30.9139	-97.0693	-113.255	80.9279
28.8655	24.4939	-187.316	89.4232	80.717	44.7271	-90.338	176.342	-221.011	-90.5106	19.7733	167.686	68.5695	-82.0157	-7.6344	80.3979	-340.369	-429.971	61.402	-34.5149	60.3391	-289.252	-462.011	-80.2213	-203.614	131.452	-72.0858	-94.3125	15.6683	-606.958	-339.27	-107.093	139.008	-222.278	-176.868	-488.866	34.8784	71.5734	-140.872	-12.8599	91.7104	97.3046	-25.1333	-22.506	-113.248	-30.9233	-97.282	-112.077	80.5243
29.4467	23.8789	-188.211	90.5507	80.8738	45.8348	-90.4128	175.533	-221.197	-91.8535	19.5132	167.668	67.6958	-81.5288	-6.84705	78.7654	-340.433	-430.959	61.6952	-35.3093	59.0151	-290.048	-463.468	-81.5032	-203.752	131.525	-72.6052	-94.8203	16.1603	-608.868	-339.513	-108.008	138.926	-222.913	-176.532	-490.271	34.9034	71.4495	-140.4	-11.1608	91.6543	96.3467	-25.741	-21.5243	-113.518	-30.6173	-97.6643	-111.707	80.4016
29.897	23.5308	-189.605	91.6291	80.8445	46.5507	-90.884	175.326	-221.392	-94.0515	19.3673	167.864	66.791	-80.6405	-5.93408	77.6636	-341.086	-432.063	62.0461	-36.2061	57.5631	-291.201	-463.935	-81.873	-204.269	131.656	-73.1097	-95.1747	17.0308	-609.597	-340.253	-108.72	138.948	-223.6	-176.22	-490.447	35.869	71.2795	-139.984	-10.9172	91.6211	95.6324	-26.261	-18.6248	-114.092	-30.2163	-97.8892	-111.074	80.2551
31.5896	23.6982	-191.138	91.9626	80.7186	46.8544	-91.2009	174.974	-221.929	-95.2194	19.1648	167.786	65.942	-80.2024	-5.28223	76.4065	-341.67	-433.07	62.5605	-36.7144	55.829	-292.513	-464.612	-81.8835	-204.039	131.562	-73.1975	-95.1769	18.9026	-611.02	-340.533	-109.437	138.785	-224.057	-176.115	-490.351	35.6281	70.9529	-139.469	-10.7173	91.451	95.2094	-26.5203	-18.5082	-115.001	-30.0712	-98.3025	-109.728	80.0609
32.198	22.6693	-191.736	92.3707	80.4773	46.9858	-91.5385	174.767	-222.638	-96.3193	18.9248	168.009	65.0776	-80.1482	-4.64807	75.4052	-341.598	-433.369	62.7196	-38.1755	54.8303	-294.058	-466.178	-81.7123	-204.072	131.527	-73.3473	-95.1763	19.7959	-611.863	-340.714	-110.26	138.665	-224.154	-175.928	-489.491	35.1849	70.3641	-139.04	-10.3826	91.4625	95.4374	-26.9313	-17.3882	-115.4	-29.5741	-98.13	-108.036	79.5482
33.3595	21.7393	-192.83	92.6605	79.9561	47.2667	-91.5754	175.055	-223.773	-97.6614	18.604	167.797	64.6948	-79.9696	-3.94922	74.4075	-341.44	-433.584	62.5061	-38.8151	53.7064	-295.411	-467.073	-80.7059	-204.254	131.508	-73.3195	-95.3867	20.0842	-612.964	-341.249	-110.147	138.493	-224.084	-175.756	-487.761	35.3468	70.3208	-138.968	-9.85046	91.7362	95.5437	-27.3497	-14.9774	-115.707	-29.668	-97.9578	-106.986	79.2687
33.6874	21.2374	-193.879	92.8739	79.4049	47.4952	-92.8892	175.414	-224.899	-99.4579	18.0718	167.968	64.7426	-79.5964	-3.25012	73.4929	-341.423	-434.302	62.3978	-39.8927	52.9384	-296.573	-468.595	-79.6558	-204.136	131.609	-73.1936	-95.6381	21.0035	-613.633	-341.849	-110.526	138.45	-224.065	-175.747	-485.073	34.8993	70.1383	-138.545	-9.19775	91.8286	95.5623	-27.7094	-13.7156	-116.054	-30.6068	-97.8925	-106.041	79.0345
34.3145	20.9215	-194.437	93.3248	79.1119	47.7571	-93.5664	176.062	-225.899	-100.847	17.6229	168.051	66.1936	-79.3831	-2.59814	72.2435	-341.584	-434.64	62.3075	-40.2382	51.7157	-297.778	-469.238	-78.861	-204.278	131.418	-73.1813	-95.7959	22.7404	-614.125	-342.205	-111.445	138.372	-224.205	-176.026	-483.579	34.7874	70.0331	-138.158	-9.00708	92.3113	95.7524	-27.7279	-12.4143	-116.625	-30.9828	-97.616	-105.097	78.2815
35.0872	20.5375	-195.208	93.5837	78.5449	48.0044	-94.6963	176.941	-226.745	-101.549	17.4121	168.014	67.1989	-79.1865	-1.71875	71.4053	-341.357	-434.903	62.2217	-41.177	50.6025	-298.616	-470.361	-78.0828	-204.532	130.65	-73.306	-96.5071	24.0933	-614.519	-342.656	-112.347	138.073	-224.873	-176.106	-480.867	34.9917	69.7052	-137.599	-9.00781	92.6351	95.8706	-27.4255	-11.7958	-117.096	-31.7164	-97.5026	-104.462	77.6472
35.4683	20.2506	-195.766	94.0399	78.204	48.1786	-95.1638	177.269	-227.368	-102.729	17.0972	167.861	69.1042	-78.0697	-1.37939	70.3494	-341.522	-435.232	62.233	-42.8795	49.4589	-299.845	-471.457	-77.7275	-204.649	129.79	-73.269	-97.8251	24.5115	-614.755	-343.817	-113.298	137.632	-225.783	-176.276	-479.082	34.8772	69.6116	-137.144	-8.37683	92.7808	95.8835	-27.0959	-10.2734	-117.505	-31.4315	-97.1785	-102.145	76.6918
36.4058	19.8857	-196.553	94.4668	77.947	48.6576	-95.903	178.532	-228.088	-104.644	16.6949	167.83	70.452	-76.1183	-1.08093	69.0713	-341.856	-435.57	62.1948	-43.3781	49.0408	-301.218	-472.482	-77.1014	-204.925	128.345	-73.265	-99.0933	25.09	-615.047	-344.546	-115.823	137.292	-227.105	-176.765	-478.183	34.0825	69.691	-136.841	-8.02246	92.9355	96.2938	-26.7744	-8.79724	-117.791	-31.2842	-96.8706	-100.631	76.0575
37.0989	19.2885	-197.202	94.4337	77.4788	49.152	-97.0238	180.185	-229.356	-105.243	16.3578	167.669	71.5072	-75.2007	-0.407837	68.2767	-341.756	-435.935	62.2163	-44.1479	48.6334	-303.271	-473.487	-76.7753	-205.036	127.547	-73.2936	-99.7581	25.374	-615.306	-345.483	-117.023	137.069	-227.797	-177.125	-476.85	34.2128	69.9226	-136.53	-6.80713	93.3258	96.1201	-26.4054	-7.17908	-118.36	-31.2347	-96.5654	-99.0239	75.5338
37.5488	18.3015	-197.777	94.3373	76.5764	49.6912	-97.811	180.833	-229.996	-106.262	15.9688	167.681	72.5679	-74.8235	-0.176758	67.1327	-341.453	-436.417	62.2247	-44.5415	47.9562	-303.878	-474.247	-76.3384	-205.621	127.042	-73.8942	-101.231	25.7245	-615.261	-345.864	-117.339	136.396	-229.009	-177.488	-476.1	34.9426	69.8988	-135.679	-5.88	93.6367	96.0535	-25.9334	-6.88794	-118.294	-31.2996	-96.1924	-97.6331	74.99
37.9186	17.5227	-198.157	94.0184	75.6714	50.0837	-98.3019	182.148	-230.86	-107.787	15.488	167.753	73.2656	-74.3442	-0.125854	66.5057	-338.44	-436.688	62.2854	-45.1693	46.3877	-304.724	-475.289	-75.5645	-207.121	126.819	-74.0983	-102.179	26.2101	-614.862	-347.121	-118.36	135.854	-230.981	-177.744	-475.377	34.9174	70.3303	-135.364	-5.19202	93.9313	96.017	-25.6815	-5.04431	-117.699	-30.9756	-96.0519	-96.2415	74.7748
38.6865	17.6277	-199.39	93.7169	74.5105	50.5259	-98.5498	183.159	-231.765	-109.018	14.5679	167.327	73.9045	-73.4214	-0.0465088	65.5604	-338.276	-437.181	62.3015	-46.6774	45.6284	-306.632	-476.049	-74.7891	-207.462	125.829	-74.348	-103.552	26.9304	-614.858	-348.205	-119.805	135.504	-231.945	-178.483	-475.378	35.1896	70.4664	-135.545	-4.72998	94.3905	96.0988	-25.5223	-3.91345	-117.168	-30.424	-96.0542	-94.6003	73.8085
40.4725	17.2246	-199.804	93.6561	73.8479	51.03	-99.6283	183.485	-232.949	-109.854	13.8478	167.39	74.9396	-72.4167	0.219727	64.2675	-338.232	-437.644	62.5273	-47.4707	45.1661	-308.64	-476.52	-74.1526	-207.568	123.668	-74.6737	-104.169	27.1704	-614.681	-349.923	-120.336	135.07	-233.477	-179.087	-475.977	35.0122	70.7725	-135.604	-4.35193	94.9135	96.0267	-25.4994	-1.85107	-116.646	-30.3732	-96.1105	-93.9745	73.1348
41.2998	16.8052	-200.72	93.2997	72.9038	51.752	-101.066	184.914	-233.998	-110.922	13.6353	167.358	75.4504	-71.8899	0.390259	63.2361	-338.139	-438.097	62.7111	-47.4436	43.2001	-309.139	-477.073	-73.7095	-207.71	121.934	-74.9733	-104.443	27.9451	-614.266	-350.789	-121.119	134.989	-235.436	-179.379	-478.254	34.7085	71.2411	-135.551	-4.28064	95.1667	95.8885	-25.442	-2.08679	-116.002	-30.2501	-95.989	-94.6864	72.7183
42.1404	16.4395	-201.237	92.9225	71.8033	52.2281	-101.903	185.797	-235.681	-112.277	13.4816	167.19	75.9751	-71.2595	0.346069	62.2509	-338.206	-438.145	63.3009	-48.5674	41.4258	-309.286	-477.324	-73.691	-207.798	121.916	-75.8088	-105.724	28.5797	-613.594	-352.825	-121.521	134.713	-236.327	-180.107	-479.328	34.2218	71.4095	-135.535	-4.01538	96.2832	96.115	-25.5482	-0.182617	-115.226	-30.1256	-95.5403	-94.7321	72.4629
42.7634	16.2438	-202.351	92.4199	71.0292	52.6486	-102.666	186.468	-236.752	-113.25	13.2529	166.767	75.5095	-70.2614	0.283447	60.3051	-338.239	-438.085	63.5201	-48.9667	41.0005	-309.611	-477.52	-74.2003	-208.43	121.38	-77.0604	-107.657	28.9867	-612.678	-354.002	-121.948	134.235	-237.433	-180.845	-479.831	33.183	70.8713	-135.685	-3.34937	97.7428	96.2003	-25.8201	1.05212	-115.444	-30.1322	-95.2565	-94.4814	71.9219
43.5769	16.1436	-203.092	91.3003	69.9192	53.9575	-103.628	188.244	-237.392	-113.97	12.9174	166.694	75.5986	-69.5354	-0.153931	58.8619	-338.166	-438.48	63.9899	-50.8369	39.7708	-310.611	-477.598	-74.6163	-209.259	120.143	-77.328	-108.193	29.7268	-611.524	-355.011	-122.496	134.278	-239.267	-182.661	-481.113	32.2039	70.9557	-136.096	-2.9281	98.3008	96.2358	-26.1346	3.45447	-115.902	-30.0895	-94.7202	-94.3883	71.2253
43.9709	15.8916	-204.165	90.4702	69.1246	54.7651	-104.576	188.729	-238.913	-114.973	12.1903	166.334	75.4926	-68.6222	-0.265747	58	-338.193	-439.054	65.158	-52.3854	38.9944	-311.707	-476.618	-75.54	-210.382	117.158	-77.515	-108.491	30.224	-611.47	-356.733	-123.074	134.36	-240.94	-183.766	-481.85	31.168	71.0159	-136.636	-2.78821	99.088	96.1136	-26.6365	3.86353	-116.381	-29.937	-94.0632	-94.2802	70.1051
45.1437	15.0065	-204.831	90.0668	68.1448	55.1804	-105.265	189.35	-240.233	-116.37	11.6753	166.138	75.4906	-68.1866	-0.663696	56.4398	-338.107	-439.556	66.0985	-53.0068	37.4211	-312.635	-475.689	-75.9091	-212.11	116.404	-78.4252	-108.786	30.5238	-611.879	-358.145	-123.461	134.592	-242.09	-184.395	-483.108	30.3286	70.7081	-137.388	-2.69482	99.5961	96.064	-27.1127	4.79993	-115.671	-29.9292	-93.3149	-93.531	69.2418
46.5634	13.9164	-205.987	90.3022	67.3615	55.6526	-105.878	190.023	-241.255	-117.326	11.2881	165.591	75.4215	-67.698	-1.5946	55.2839	-338.348	-441.379	66.9043	-53.5256	36.0408	-313.297	-475.523	-76.175	-212.737	116.034	-78.3791	-109.43	30.8462	-614.803	-358.639	-124.003	135.074	-242.93	-185.752	-484.384	29.8182	71.011	-137.912	-2.4093	100.806	96.0566	-27.5032	5.4082	-114.656	-29.7926	-93.2271	-93.317	70.4806
48.0428	13.6437	-206.636	91.0569	66.551	55.9546	-106.373	190.217	-242.286	-117.808	11.4248	165.051	75.1406	-66.9124	-2.71997	53.9503	-338.764	-442.104	67.0514	-54.1066	34.4137	-313.904	-475.15	-76.3301	-212.62	114.599	-78.0878	-111.494	31.4381	-616.321	-359.49	-124.402	135.466	-244.362	-188.322	-485.054	28.8807	71.4521	-138.47	-2.45605	102.492	96.4231	-27.5781	4.29126	-115.127	-28.9611	-92.9564	-93.1753	70.6405
48.483	12.5017	-207.77	92.0609	65.9424	56.6136	-107.245	190.836	-242.923	-118.677	11.462	164.694	75.15	-66.5208	-3.63818	53.2098	-338.97	-442.362	67.6278	-55.0332	33.0818	-314.683	-474.386	-76.486	-213.053	112.896	-77.991	-112.515	31.6801	-617.534	-360.826	-124.432	135.795	-245.366	-189.469	-485.978	27.932	71.7424	-139.772	-1.66931	102.935	96.5675	-27.2632	3.63782	-115.22	-28.4714	-92.4248	-93.134	71.3036
49.0085	12.0302	-208.467	93.4666	65.1074	57.9575	-108.391	191.592	-243.672	-119.404	11.4742	164.25	74.9385	-65.8883	-4.1969	51.8314	-339.616	-443.285	68.3931	-56.5645	32.5709	-316.291	-473.027	-76.5759	-213.698	111.413	-77.7814	-113.028	32.1324	-618.982	-361.461	-124.7	136.281	-246.313	-189.946	-486.591	26.931	71.8506	-141.308	-0.919067	103.22	96.4434	-27.2762	2.15991	-114.704	-28.1409	-91.3959	-93.0844	71.3081
48.4778	11.8071	-209.383	94.255	64.1927	59.1514	-109.237	191.66	-244.881	-119.879	11.3647	163.787	74.6976	-65.3049	-4.96924	51.3428	-340.489	-445.659	69.2771	-57.3741	31.7113	-317.643	-472.28	-76.604	-214.854	111.314	-77.8696	-113.32	32.6464	-621.901	-362.1	-124.714	136.754	-246.864	-191.377	-487.415	26.1115	71.8761	-142.461	0.655029	104.47	96.5625	-27.5299	0.701294	-114.413	-27.5746	-90.403	-92.8436	71.0319
48.0391	11.5023	-210.364	94.6115	63.1786	59.5493	-109.818	192.128	-245.616	-120.601	11.484	163.464	74.4988	-64.3855	-5.2998	50.3566	-340.843	-446.877	69.5897	-57.8229	30.1232	-317.991	-471.822	-76.6384	-216.225	110.662	-77.9108	-114.17	32.8135	-623.23	-363.235	-124.737	136.83	-247.6	-193.012	-488.201	25.3822	71.9254	-143.5	1.23242	106.497	96.6438	-28.0985	-0.746338	-114.293	-27.1323	-90.2419	-91.7355	71.0587
47.9821	11.0842	-211.663	95.1443	61.8611	59.9264	-110.068	193.283	-245.88	-121.415	11.714	163.03	74.0481	-64.0413	-6.13843	49.8503	-340.978	-448.391	69.8572	-58.1099	29.1317	-318.389	-471.409	-76.6466	-217.153	109.717	-77.3341	-115.882	33.1377	-624.011	-365.389	-124.874	137.18	-248.209	-193.839	-489.398	23.605	71.9709	-144.765	1.849	107.315	96.8766	-28.1738	-0.693115	-114.449	-26.5264	-89.5856	-91.333	71.0819
47.1165	10.6488	-213.24	95.4475	61.1534	60.3309	-111.168	191.868	-245.002	-121.933	12.1428	162.585	73.4624	-63.6674	-7.00854	49.1113	-341.572	-448.96	70.2784	-59.1641	27.8658	-319.197	-471.223	-76.7709	-217.792	109.054	-76.9092	-117.016	33.583	-626.177	-366.683	-124.879	137.534	-249.327	-194.032	-490.479	22.192	72.0964	-145.605	1.96619	107.626	96.9841	-28.3177	-0.759888	-114.644	-26.0359	-88.5077	-91.5587	70.8459
46.6981	10.0504	-213.652	95.8346	60.264	60.9906	-112.352	190.802	-245.082	-122.548	12.7922	161.657	72.3395	-63.3733	-7.50586	48.6509	-342.241	-450.811	70.6006	-60.9396	27.2263	-321.202	-470.684	-76.7874	-217.842	108.034	-76.7104	-118.09	34.191	-627.548	-367.418	-124.942	137.534	-250.55	-194.744	-492.393	21.4149	72.4241	-146.385	2.12781	109.2	97.1069	-29.1942	-0.721191	-115.257	-25.697	-87.3763	-90.7411	70.7478
46.9402	9.61145	-214.555	96.0699	59.3658	62.2683	-112.963	190.294	-245.345	-123.01	13.3198	160.94	71.358	-62.6788	-8.16821	49.0128	-342.479	-452.075	70.7924	-61.8579	26.4374	-322.214	-470.147	-76.7993	-217.786	106.775	-76.0553	-118.323	35.2582	-628.787	-369.561	-125.029	137.833	-251.228	-196.156	-493.293	20.7019	72.6418	-146.885	2.26172	110.773	97.2496	-30.4735	-0.423584	-115.152	-25.505	-86.4248	-90.3821	70.7296
47.1232	9.64429	-215.763	96.6198	59.0355	63.5228	-113.9	189.696	-245.815	-123.545	13.6436	160.405	70.9475	-62.1345	-8.83057	49.4219	-342.519	-453.638	71.0115	-61.934	25.6676	-322.547	-470.068	-76.8084	-218.075	105.92	-75.4857	-118.782	35.6311	-630.158	-370.888	-125.249	138.21	-252.035	-197.454	-494.626	20.3132	72.8379	-147.19	2.37659	111.848	97.528	-31.3929	-0.541016	-115.977	-25.8579	-85.7771	-89.8934	70.7522
47.2981	9.41724	-217.713	97.0057	58.9086	64.4557	-114.976	189.33	-246.378	-124.18	14.2632	159.788	70.9197	-61.8812	-9.26343	49.4202	-342.758	-454.593	71.3854	-62.3168	25.2222	-323.123	-470.25	-76.813	-218.385	105.344	-75.0718	-117.894	35.9403	-633.106	-372.055	-125.684	138.336	-253.025	-197.976	-496.627	21.5079	73.0135	-148.411	2.8241	111.856	97.806	-31.7988	-1.24268	-116.725	-26.5378	-85.4271	-88.9916	70.6667
47.7637	9.25916	-218.891	97.3583	57.9403	64.8176	-115.078	188.596	-246.531	-124.345	14.6191	159.256	70.2156	-61.0809	-9.35547	49.5452	-343.098	-455.708	71.3859	-63.1526	24.485	-323.867	-470.582	-76.7732	-217.904	104.047	-74.9194	-117.686	36.5488	-634.983	-373.178	-125.681	138.159	-254.294	-198.176	-499.564	22.756	73.4198	-148.786	3.0459	111.781	97.8821	-32.1727	-1.38293	-118.439	-26.5597	-85.1544	-87.5908	70.4772
48.3881	9.12024	-219.62	97.7169	57.2322	65.4861	-114.544	187.363	-246.709	-124.712	15.804	158.919	69.4899	-59.8416	-9.2157	49.7379	-343.315	-456.349	70.7882	-64.8893	23.6794	-324.422	-470.75	-76.6088	-217.788	103.381	-74.4875	-116.746	36.8308	-636.025	-374.193	-125.98	138.033	-254.652	-198.208	-500.362	23.9821	73.8153	-149.016	3.09399	112.554	97.9137	-32.673	-2.00366	-119.291	-26.4235	-84.2441	-85.6293	70.452
48.2756	9.16882	-220.752	98.1293	56.6289	65.8767	-114.962	186.307	-246.879	-125.128	16.6702	158.564	69.3545	-59.0243	-9.12524	48.4325	-343.471	-457.843	69.4543	-66.356	23.5823	-324.7	-470.755	-76.1552	-217.214	102.698	-73.7771	-114.648	37.1598	-637.731	-375.433	-126.077	138.309	-255.254	-198.583	-502.129	25.3663	74.0751	-149.457	3.75476	114.143	97.735	-33.2743	-2.82703	-119.612	-26.2318	-84.5765	-84.8909	70.4639
47.9786	9.1416	-222.116	98.5507	55.738	66.163	-115.451	185.682	-247.362	-125.475	17.5812	158.256	68.9736	-58.6299	-9.08032	47.46	-343.613	-458.175	68.7421	-66.7791	23.391	-325.43	-470.293	-75.5162	-216.19	100.925	-73.3138	-112.927	37.694	-639.876	-376.421	-125.863	138.656	-256.439	-196.994	-504.442	26.5641	74.2402	-150.864	4.13367	113.83	97.6125	-33.8632	-4.01135	-121.129	-25.7638	-85.834	-84.6672	70.483
47.9216	9.09021	-223.321	98.5385	55.0361	66.8312	-115.474	185.201	-247.605	-125.952	18.5439	157.911	68.8141	-58.72	-8.88928	46.4447	-343.694	-457.832	67.5149	-67.4451	23.2742	-326.166	-469.817	-75.3105	-214.122	100.215	-72.9381	-112.513	38.0502	-640.826	-377.072	-125.588	138.443	-256.838	-195.726	-506.099	27.3286	74.3844	-152.528	4.26733	115.375	97.7312	-34.7867	-5.30127	-121.952	-25.5226	-86.8715	-83.9871	70.478
47.4146	8.92371	-224.182	98.5137	54.8337	67.1888	-115.07	184.493	-247.392	-126.265	18.908	157.42	68.5564	-58.0834	-8.80603	45.1965	-343.988	-457.746	67.792	-68.4678	22.725	-326.248	-469.604	-74.3589	-213.645	99.5013	-72.6948	-111.348	38.5682	-641.199	-377.577	-125.299	138.986	-257.304	-194.351	-506.821	27.3166	74.6794	-153.248	4.11768	114.801	97.7202	-35.2119	-5.60571	-122.761	-25.53	-87.3717	-82.7441	70.5145
47.3333	8.82385	-225.082	98.5153	54.3193	67.6433	-114.779	183.548	-246.81	-127.181	19.4846	157.139	68.4114	-56.916	-8.97485	43.9967	-344.195	-457.748	68.5093	-69.7318	21.5936	-326.327	-469.359	-73.1542	-212.955	98.3461	-72.5911	-109.932	39.1381	-644.458	-377.799	-124.512	139.51	-256.789	-193.2	-508.538	27.0292	75.3397	-154.111	3.80762	114.1	97.7968	-35.751	-5.5531	-124.691	-25.5734	-88.8721	-81.9167	70.4908
47.1544	8.73242	-227.084	98.514	53.464	68.073	-114.432	182.4	-245.815	-128.324	20.2113	156.744	68.4062	-56.3656	-8.9624	43.1106	-344.379	-457.677	68.7734	-71.1925	20.323	-326.619	-469.35	-71.9856	-211.441	97.1212	-72.5397	-108.575	39.6942	-645.886	-378.289	-123.789	140.088	-256.086	-192.312	-509.996	26.689	76.4291	-154.585	3.93799	111.018	97.8538	-36.7061	-6.41394	-127.055	-25.3319	-90.4955	-80.693	70.4989
46.4078	8.69568	-228.118	98.0835	52.6786	68.7848	-113.957	182.097	-245.146	-129.547	21.3242	156.221	68.3553	-55.8136	-8.87512	42.4246	-344.477	-457.724	68.7692	-72.1719	19.8602	-326.953	-469.672	-71.025	-211.249	94.6744	-72.4702	-107.077	40.1766	-646.571	-378.307	-123.293	139.807	-254.583	-191.293	-510.798	26.579	77.035	-155.869	3.6438	110.942	97.6573	-36.9419	-7.41064	-128.086	-25.3837	-91.4838	-80.0627	70.5382
45.2786	8.6051	-228.856	97.8707	52.4962	69.3326	-113.473	182.025	-244.476	-130.109	22.5303	155.932	68.1355	-55.1055	-8.65247	41.5133	-344.781	-457.028	68.8699	-72.6879	19.2501	-327.296	-470.227	-70.3241	-211.16	94.4153	-72.3921	-106.308	40.8905	-647.351	-377.653	-122.605	139.991	-253.67	-190.965	-511.62	27.2719	78.3518	-157.803	3.58643	109.861	97.6451	-37.655	-7.87036	-128.528	-25.4863	-92.5439	-79.9384	70.3585
44.0271	8.64294	-229.886	97.6365	51.9565	69.8983	-112.49	182.061	-244.302	-131.024	22.7133	155.117	68.084	-54.5463	-8.31836	39.9503	-345.099	-455.884	68.7734	-73.1298	18.7291	-327.492	-470.311	-69.41	-211.103	93.9972	-72.3151	-105.595	41.8502	-648.245	-377.811	-122.21	140.508	-253.214	-190.437	-512.651	27.677	79.6702	-158.541	3.98108	109.098	97.8235	-37.8818	-8.85437	-130.063	-25.3468	-93.2603	-79.714	70.1172
43.3698	8.74597	-230.549	97.424	51.3445	70.8496	-111.794	181.992	-244.68	-131.936	22.4916	154.354	68.0363	-54.0137	-7.48572	39.2568	-345.219	-454.378	68.608	-74.6979	18.5782	-327.688	-471.529	-68.8315	-211.11	92.8634	-72.1332	-104.824	42.1187	-648.686	-377.875	-122.045	141.128	-252.884	-190.166	-513.245	29.0464	81.0573	-159.143	4.96033	108.312	97.8008	-38.0299	-9.37769	-132.234	-25.281	-94.1152	-78.0126	69.7928
[truncated: 1,034 more rows]

## Sheet: Fig 1A-y coordinate
0	0	0	0	0	0	0	0	0	0	0	0	0	0	0	0	0	0	0	0	0	0	0	0	0	0	0	0	0	0	0	0	0	0	0	0	0	0	0	0	0	0	0	0	0	0	0	0	0
[truncated: 1,999 more rows]

## Sheet: Fig 1B
with temperature gradient							without temperature gradient
[truncated: 85,978 more rows]

## Sheet: Fig 1D
-0.000473022
-4.95911e-05
0.00104523
0.00183105
0.00201607
0.00148582
0.00269508
0.00175858
0.00177574
0.00198936
0.00279617
0.00182724
[truncated: 31,801 more rows]

## Sheet: Fig1-S1A
# of mid-run cooling epochs per run		# of mid-run cooling epochs per run (dT/dt<-.001°C)		# of mid-run cooling epochs per run (dT/dt<-.005°C)
[truncated: 843 more rows]

[truncated: 1 more sheets: Fig1-S1BC]
