# Supplementary material for: Corollary discharge promotes a sustained motor state in a neural circuit for navigation
Source: eLife. 2021 Apr 21;10:e68848. doi: 10.7554/eLife.68848 (PMC8139836; doi:10.7554/eLife.68848)
Supplement: Figure 2—source data 1. [file elife-68848-fig2-data1.xlsx]

## Sheet: Fig 2C
Time (s)	Temperature change (Celsius/s)	Locomotion state (forward = 1, Reverse = -1)	Calcium activity of AFD (dR/R0)
71	0	-1	0.114626
71.5	0	-1	0.0916593
72	0	-1	0.068931
72.5	0	-1	0.0620639
73	0.000952381	-1	0.0551969
73.5	0.00155844	-1	0.0844536
74	0.00307692	-1	0.116238
74.5	0.00483516	-1	0.13557
75	0.00769231	-1	0.152816
75.5	0.010989	1	0.170063
76	0.0153846	1	0.188025
76.5	0.0215385	1	0.206139
77	0.0281319	1	0.209518
77.5	0.0353846	1	0.207574
78	0.0424176	1	0.217529
78.5	0.0481319	1	0.233822
79	0.0538462	1	0.246915
79.5	0.0591209	1	0.257635
80	0.0632967	1	0.274828
80.5	0.0663736	1	0.298639
81	0.0676923	1	0.347075
81.5	0.0674725	1	0.431212
82	0.0663736	1	0.5107
82.5	0.0630769	1	0.580663
83	0.0575824	1	0.647747
83.5	0.0503297	1	0.705996
84	0.0415385	-1	0.75589
84.5	0.0323077	-1	0.763807
85	0.0228571	-1	0.770907
85.5	0.0123077	-1	0.769072
86	0.0021978	-1	0.767224
86.5	-0.00813187	-1	0.761894
87	-0.0186813	-1	0.756565
87.5	-0.0283516	-1	0.751235
88	-0.0384615	-1	0.718862
88.5	-0.0483516	-1	0.68307
89	-0.0571429	-1	0.649755
89.5	-0.0665934	-1	0.617062
90	-0.0740659	-1	0.575669
90.5	-0.0808791	-1	0.530716
91	-0.0874725	-1	0.488167
91.5	-0.0920879	-1	0.447044
92	-0.0962637	-1	0.409647
92.5	-0.0991209	-1	0.375356
93	-0.10022	-1	0.34516
93.5	-0.101099	-1	0.319945
94	-0.10044	-1	0.295164
94.5	-0.0984615	-1	0.271187
95	-0.0962637	-1	0.249512
95.5	-0.0923077	-1	0.234502
96	-0.0868132	-1	0.219766
96.5	-0.081978	-1	0.206319
97	-0.0758242	-1	0.192808
97.5	-0.0681319	-1	0.178685
98	-0.0604396	-1	0.164676
98.5	-0.0520879	-1	0.159337
99	-0.0432967	-1	0.153998
99.5	-0.0351648	-1	0.14898
100	-0.0246154	-1	0.15343
100.5	-0.0142857	-1	0.157881
101	-0.00395604	-1	0.16939
101.5	0.00703297	-1	0.181249
102	0.0178022	-1	0.183085
102.5	0.0281319	-1	0.183244
103	0.0397802	-1	0.167941
103.5	0.0496703	-1	0.147882
104	0.0591209	-1	0.125662
104.5	0.0674725	-1	0.102447
105	0.0758242	-1	0.0857482
105.5	0.0830769	-1	0.0733138
106	0.0902897	-1	0.0683076
106.5	0.0946853	-1	0.0699896
107	0.0986414	-1	0.0700447
107.5	0.101499	-1	0.0680822
108	0.103037	-1	0.0742911
108.5	0.103037	-1	0.0944016
109	0.101938	-1	0.1086
109.5	0.0991209	-1	0.108463
110	0.0967033	-1	0.111983
110.5	0.0925275	-1	0.129097
111	0.0872527	-1	0.146211
111.5	0.0815385	-1	0.163786
112	0.0753846	-1	0.184821
112.5	0.0681718	-1	0.206905
113	0.0609191	-1	0.268634
113.5	0.0514685	-1	0.330362
114	0.0422378	-1	0.398707
114.5	0.033007	-1	0.467614
115	0.0228971	-1	0.526799
115.5	0.0125674	-1	0.583815
116	0.0021978	-1	0.621822
116.5	-0.00901099	-1	0.652201
117	-0.0191209	-1	0.671921
117.5	-0.0287912	-1	0.685262
118	-0.0389011	-1	0.693429
118.5	-0.0487912	-1	0.696736
119	-0.0591209	-1	0.691254
119.5	-0.0683516	-1	0.674189
120	-0.076044	-1	0.650959
120.5	-0.0832967	-1	0.61645
121	-0.0898901	-1	0.576315
121.5	-0.0945055	-1	0.520592
122	-0.0978022	-1	0.470783
122.5	-0.0995604	-1	0.44734
123	-0.10022	-1	0.423896
123.5	-0.100879	-1	0.399496
124	-0.10022	-1	0.369721
124.5	-0.0982418	1	0.341611
125	-0.0956044	1	0.335294
125.5	-0.0912088	1	0.328976
126	-0.0861538	1	0.305838
126.5	-0.08	1	0.282578
127	-0.0727473	1	0.255252
127.5	-0.0650549	1	0.227509
128	-0.0578022	1	0.205622
128.5	-0.0501099	1	0.184944
129	-0.041978	1	0.182279
129.5	-0.0331868	1	0.18572
130	-0.0236354	1	0.197921
130.5	-0.0139651	1	0.214661
131	-0.00363545	1	0.225233
131.5	0.00735356	1	0.231304
132	0.0183426	1	0.232402
132.5	0.0286722	1	0.228438
133	0.0383426	1	0.224083
133.5	0.0472527	1	0.219149
134	0.0567033	1	0.208702
134.5	0.0654945	1	0.186646
135	0.0738462	1	0.164589
135.5	0.0810989	1	0.143193
136	0.0872527	1	0.124367
136.5	0.0926464	1	0.10513
137	0.0972618	1	0.0827749
137.5	0.100119	1	0.061455
138	0.101218	1	0.0736161
138.5	0.101657	1	0.0857771
139	0.100998	1	0.100372
139.5	0.0998992	1	0.115106
140	0.0973626	1	0.144496
140.5	0.0931868	1	0.176644
141	0.0879121	1	0.226149
141.5	0.0828571	1	0.281261
142	0.0762637	1	0.340591
142.5	0.069011	1	0.401927
143	0.0606593	1	0.459198
143.5	0.0516484	1	0.513754
144	0.0428571	1	0.56127
144.5	0.0336264	1	0.602173
145	0.0228571	1	0.639913
145.5	0.0125275	1	0.67352
146	0.00175824	1	0.700109
146.5	-0.00857143	1	0.713848
147	-0.0191209	1	0.727586
147.5	-0.0296703	1	0.741076
148	-0.0404396	1	0.753938
148.5	-0.0503297	1	0.762976
149	-0.0595604	1	0.756848
149.5	-0.0676923	1	0.749681
150	-0.0751648	1	0.734838
150.5	-0.0824176	1	0.719268
151	-0.0879121	1	0.68672
151.5	-0.0918681	1	0.654173
152	-0.0951648	1	0.618641
152.5	-0.0975824	1	0.582962
153	-0.0993407	1	0.551077
153.5	-0.0995604	1	0.519829
154	-0.098022	1	0.501675
154.5	-0.0967033	-1	0.487598
155	-0.0940659	-1	0.46926
155.5	-0.0903297	-1	0.448942
156	-0.0859341	-1	0.420576
156.5	-0.0810989	-1	0.386853
157	-0.0749451	-1	0.340067
157.5	-0.0683516	-1	0.281027
158	-0.0606593	-1	0.246933
158.5	-0.0523077	-1	0.245263
159	-0.0435165	-1	0.243594
159.5	-0.0340659	-1	0.254612
160	-0.0235165	1	0.288524
160.5	-0.0138462	1	0.326963
161	-0.00285714	1	0.377856
161.5	0.00725275	1	0.420008
162	0.0175824	1	0.419544
162.5	0.0285714	1	0.416844
163	0.0389011	1	0.389906
163.5	0.0487912	1	0.362912
164	0.0582418	1	0.326999
164.5	0.0665934	1	0.291087
165	0.0751648	1	0.262727
165.5	0.081978	1	0.234988
166	0.0874725	1	0.222103
166.5	0.0923077	1	0.211922
167	0.0956044	1	0.212524
167.5	0.0978022	1	0.216457
168	0.0997802	1	0.222843
168.5	0.0997802	1	0.230376
169	0.0989011	1	0.23263
169.5	0.0971429	1	0.231363
170	0.0938462	1	0.23886
170.5	0.0903297	1	0.254652
171	0.0863736	1	0.270443
171.5	0.0804396	1	0.298727
172	0.0749451	1	0.342554
172.5	0.0683516	1	0.39339
173	0.0602198	1	0.456389
173.5	0.0531868	1	0.517152
174	0.0446154	1	0.572313
174.5	0.0342857	1	0.627436
175	0.0250549	1	0.6824
175.5	0.0142857	1	0.737263
176	0.00417582	1	0.791309
176.5	-0.00505495	1	0.845163
177	-0.0164835	1	0.881488
177.5	-0.0274725	1	0.917814
178	-0.0373626	1	0.914299
178.5	-0.0483516	-1	0.907823
179	-0.0571429	-1	0.863346
179.5	-0.0659341	-1	0.812311
180	-0.0753846	-1	0.75754
180.5	-0.081978	-1	0.70167
181	-0.0868132	-1	0.645735
181.5	-0.0923077	-1	0.58977
182	-0.0956044	-1	0.552182
182.5	-0.0989011	-1	0.526216
183	-0.101319	-1	0.50025
183.5	-0.101319	-1	0.469125
184	-0.101319	-1	0.433438
184.5	-0.100879	-1	0.401699
185	-0.0975824	-1	0.374975
185.5	-0.0942857	-1	0.349714
186	-0.0894505	-1	0.32721
186.5	-0.0832967	-1	0.305326
187	-0.0773626	-1	0.285282
187.5	-0.0703297	-1	0.26756
188	-0.0615385	-1	0.261464
188.5	-0.0527473	-1	0.255196
189	-0.0430769	-1	0.247146
189.5	-0.0331868	-1	0.239091
190	-0.0226374	-1	0.229933
190.5	-0.010989	-1	0.220774
191	8.67362e-19	-1	0.211164
191.5	0.0103297	-1	0.201516
192	0.0213187	-1	0.194752
192.5	0.0312088	-1	0.188531
193	0.0410989	-1	0.182275
193.5	0.050989	-1	0.17601
194	0.0591209	-1	0.172063
194.5	0.0674725	-1	0.169189
195	0.0747253	-1	0.166315
195.5	0.0808791	-1	0.165015
196	0.087033	-1	0.164577
196.5	0.0914286	-1	0.167854
197	0.0940659	-1	0.173986
197.5	0.0975824	-1	0.177833
198	0.0991209	-1	0.179256
198.5	0.0995604	-1	0.181117
199	0.0993407	-1	0.183625
199.5	0.0982418	-1	0.189597
200	0.0958242	-1	0.202823
200.5	0.092967	-1	0.222722
201	0.0876923	-1	0.264293
201.5	0.0826374	-1	0.308311
202	0.0764835	1	0.365619
202.5	0.0687912	1	0.423038
203	0.0604396	1	0.482297
203.5	0.0516484	1	0.541556
204	0.0417582	1	0.581767
204.5	0.0325275	1	0.621293
205	0.0221978	1	0.659011
205.5	0.0120879	1	0.6965
206	0.00241758	1	0.726242
206.5	-0.00835165	1	0.754154
207	-0.0184615	1	0.782067
207.5	-0.0281319	1	0.807029
208	-0.0384615	1	0.831013
208.5	-0.0481319	1	0.841412
209	-0.0573626	1	0.844399
209.5	-0.0661538	1	0.828689
210	-0.0738462	1	0.797608
210.5	-0.0810989	1	0.765352
211	-0.0876923	-1	0.731712
211.5	-0.0931868	-1	0.690102
212	-0.0978022	-1	0.634114
212.5	-0.101319	-1	0.574038
213	-0.103516	-1	0.502832
213.5	-0.104176	-1	0.432193
214	-0.103516	-1	0.363998
214.5	-0.101978	-1	0.29845
215	-0.0982418	-1	0.255176
215.5	-0.0938462	-1	0.21253
216	-0.0883516	-1	0.193041
216.5	-0.0817582	-1	0.173553
217	-0.0745055	-1	0.16983
217.5	-0.0668132	-1	0.166975
218	-0.058022	-1	0.167174
218.5	-0.049011	-1	0.167844
219	-0.0397802	-1	0.168514
219.5	-0.0298901	-1	0.178582
220	-0.02	-1	0.189911
220.5	-0.00967033	-1	0.192321
221	0.000659341	-1	0.192444
221.5	0.0105495	-1	0.190629
222	0.0202198	-1	0.187951
222.5	0.0301099	-1	0.18319
223	0.04	-1	0.177108
223.5	0.0485714	-1	0.173367
224	0.0573626	-1	0.171672
224.5	0.0657143	-1	0.173046
225	0.0734066	-1	0.178116
225.5	0.0802198	-1	0.181139
226	0.0868132	-1	0.180759
226.5	0.0912088	-1	0.178968
227	0.0951648	-1	0.173836
227.5	0.0973626	-1	0.168611
228	0.0989011	-1	0.16304
228.5	0.1	-1	0.160529
229	0.0997802	-1	0.177553
229.5	0.0975824	-1	0.195016
230	0.0958242	-1	0.2197
230.5	0.0923077	-1	0.244384
231	0.0876923	-1	0.269068
231.5	0.0826374	-1	0.314483
232	0.0764835	-1	0.360468
232.5	0.0687912	-1	0.396439
233	0.0610989	-1	0.431005
233.5	0.0516484	-1	0.471287
234	0.0430769	-1	0.513043
234.5	0.0338462	-1	0.562523
235	0.0230769	-1	0.615361
235.5	0.0123077	-1	0.668802
236	0.00153846	-1	0.722655
236.5	-0.00985092	-1	0.768802
237	-0.0199608	-1	0.807083
237.5	-0.0304655	-1	0.829489
238	-0.0412347	1	0.828916
238.5	-0.0506853	1	0.823799
239	-0.059916	1	0.808941
239.5	-0.0676083	1	0.791194
240	-0.0740212	1	0.763915
240.5	-0.0812739	1	0.735077
241	-0.087033	1	0.696835
241.5	-0.090989	1	0.659209
242	-0.0947253	1	0.630855
242.5	-0.0967033	1	0.602501
243	-0.0978414	1	0.574147
243.5	-0.0991601	1	0.537063
244	-0.0983257	1	0.499876
244.5	-0.097007	1	0.477686
245	-0.0952488	1	0.457052
245.5	-0.0915125	1	0.444472
246	-0.0875565	1	0.433612
246.5	-0.0826821	1	0.42113
247	-0.0754294	1	0.408072
247.5	-0.0685714	1	0.394742
248	-0.0613187	1	0.381272
248.5	-0.0527473	1	0.354176
249	-0.0443956	1	0.316876
249.5	-0.0349451	1	0.277476
250	-0.0243956	1	0.235922
250.5	-0.0147253	1	0.193545
251	-0.00373626	1	0.149922
251.5	0.00835165	1	0.116438
252	0.0193407	1	0.104718
252.5	0.0301099	1	0.0946981
253	0.0397802	1	0.0900811
253.5	0.0483516	1	0.0862222
254	0.0578022	1	0.086672
254.5	0.0665934	1	0.0871219
255	0.0738462	1	0.0873597
255.5	0.0815385	1	0.0862439
256	0.0876923	1	0.0853084
256.5	0.0927473	1	0.0896253
257	0.0973626	1	0.0939422
257.5	0.10022	1	0.107732
258	0.101099	1	0.122181
258.5	0.100879	1	0.137254
259	0.0997802	1	0.15245
259.5	0.0986813	1	0.186617
260	0.0969231	1	0.227478
260.5	0.0927473	1	0.275662
261	0.0881319	1	0.327913
261.5	0.0832967	1	0.387108
262	0.0767033	1	0.452152
262.5	0.0694505	1	0.508373
263	0.0610989	-1	0.553845
263.5	0.0516484	-1	0.633254
264	0.0417582	-1	0.77025
264.5	0.030989	-1	0.87148
265	0.0202198	-1	0.886241
265.5	0.0101099	-1	0.899074
266	-0.0010989	-1	0.904672
266.5	-0.0118681	-1	0.910269
267	-0.021978	-1	0.88876
267.5	-0.0320879	-1	0.783627
268	-0.0408791	-1	0.694289
268.5	-0.0496703	-1	0.686293
269	-0.0584615	-1	0.67648
269.5	-0.0661538	-1	0.646956
270	-0.0731868	-1	0.617484
270.5	-0.0791209	-1	0.596356
271	-0.0835165	-1	0.575227
271.5	-0.0879121	-1	0.556118
272	-0.0918681	-1	0.537217
272.5	-0.0942857	-1	0.527106
273	-0.0964835	-1	0.518974
273.5	-0.0978022	-1	0.504813
274	-0.098022	-1	0.488463
274.5	-0.0982418	-1	0.472084
275	-0.0971429	-1	0.45569
275.5	-0.0945055	-1	0.448707
276	-0.0907692	-1	0.4488
276.5	-0.0854945	-1	0.445999
277	-0.0789011	-1	0.44021
277.5	-0.0723077	-1	0.434286
278	-0.0635165	-1	0.428169
278.5	-0.0542857	-1	0.422052
279	-0.0443956	-1	0.412136
279.5	-0.0334066	-1	0.394632
280	-0.0221978	-1	0.381037
280.5	-0.0112088	-1	0.379074
281	0.00043956	-1	0.37651
281.5	0.0114286	-1	0.371003
282	0.0224176	-1	0.364723
282.5	0.0336264	-1	0.350568
283	0.0430769	-1	0.33628
283.5	0.0523077	-1	0.310448
284	0.0610989	-1	0.284616
284.5	0.0687912	-1	0.257459
285	0.0764835	-1	0.230163
285.5	0.0826374	-1	0.202482
286	0.087033	-1	0.174714
286.5	0.0918681	-1	0.150335
287	0.0951648	-1	0.127191
287.5	0.0973626	-1	0.113963
288	0.0989011	-1	0.106048
288.5	0.0995604	-1	0.112803
289	0.0986813	-1	0.130671
289.5	0.098022	-1	0.153134
290	0.0951648	-1	0.180364
290.5	0.0916484	-1	0.207595
291	0.0876923	-1	0.241761
291.5	0.0821978	-1	0.285394
292	0.0753846	-1	0.330037
292.5	0.0687912	-1	0.3766
293	0.06	-1	0.421477
293.5	0.0512088	-1	0.461624
294	0.0413187	-1	0.501621
294.5	0.030989	-1	0.540934
295	0.0206593	-1	0.580538
295.5	0.0101099	-1	0.622822
296	-0.0010989	-1	0.665067
296.5	-0.0114286	-1	0.705271
297	-0.0215385	-1	0.745475
297.5	-0.0312088	-1	0.775808
298	-0.0410989	-1	0.805283
298.5	-0.0503297	-1	0.822651
299	-0.0586813	-1	0.837547
299.5	-0.0663736	-1	0.852462
300	-0.0734066	-1	0.867384
300.5	-0.0793407	-1	0.875833
301	-0.0841758	-1	0.88101
301.5	-0.0885714	-1	0.87265
302	-0.0920879	-1	0.85464
302.5	-0.0949451	-1	0.83663
303	-0.0967033	-1	0.806061
303.5	-0.098022	-1	0.752129
304	-0.0986813	-1	0.692444
304.5	-0.0982418	-1	0.616195
305	-0.096044	-1	0.543848
305.5	-0.0931868	-1	0.489549
306	-0.0894505	-1	0.436287
306.5	-0.0846154	-1	0.39265
307	-0.0786813	-1	0.349464
307.5	-0.0716484	-1	0.334737
308	-0.0635165	-1	0.320009
308.5	-0.0547253	-1	0.29214
309	-0.0450549	-1	0.263354
309.5	-0.0349451	-1	0.231943
310	-0.0237363	-1	0.200072
310.5	-0.0120879	-1	0.175321
311	-0.0010989	-1	0.1528
311.5	0.00989011	-1	0.145628
312	0.0202198	-1	0.1457
312.5	0.0307692	-1	0.158956
313	0.0417582	-1	0.181106
313.5	0.0516484	-1	0.201252
314	0.0604396	-1	0.219514
314.5	0.0687912	-1	0.237775
315	0.076044	-1	0.259643
315.5	0.0828571	-1	0.284697
316	0.0887912	-1	0.300796
316.5	0.0925275	-1	0.305807
317	0.0951648	-1	0.306434
317.5	0.098022	-1	0.299486
318	0.0991209	-1	0.28909
318.5	0.0995604	-1	0.27012
319	0.0989011	-1	0.255173
319.5	0.096044	-1	0.255898
320	0.0931868	-1	0.259452
320.5	0.0896703	1	0.283626
321	0.0843956	1	0.308819
321.5	0.0797802	1	0.357036
322	0.0742857	1	0.405254
322.5	0.067033	1	0.432644
323	0.06	1	0.459075
323.5	0.0516484	1	0.485917
324	0.0424176	1	0.512817
324.5	0.0336264	1	0.536608
325	0.023956	1	0.559603
325.5	0.0136264	1	0.599408
326	0.00461538	1	0.645932
326.5	-0.00571429	1	0.692457
327	-0.0158242	1	0.72784
327.5	-0.0254945	1	0.756852
328	-0.0362637	1	0.789128
328.5	-0.0468132	1	0.824251
329	-0.0564835	1	0.846025
329.5	-0.0665934	1	0.850393
330	-0.0740659	1	0.859791
330.5	-0.0806593	1	0.879227
331	-0.0872527	1	0.89461
331.5	-0.0920879	1	0.897279
332	-0.0958242	1	0.896792
332.5	-0.0993407	1	0.87917
333	-0.10044	1	0.859662
333.5	-0.101758	1	0.802395
334	-0.101758	1	0.745128
334.5	-0.10022	1	0.687849
335	-0.098022	1	0.63057
335.5	-0.0942857	1	0.582663
336	-0.0881319	1	0.535989
336.5	-0.0826374	1	0.472907
337	-0.0767033	1	0.405864
337.5	-0.0696703	1	0.356246
338	-0.061978	1	0.313165
338.5	-0.0534066	1	0.270083
339	-0.0441758	1	0.216633
339.5	-0.0353846	1	0.158595
340	-0.0248352	1	0.154206
340.5	-0.0131868	1	0.183659
341	-0.0021978	1	0.20905
341.5	0.00923077	1	0.230913
342	0.0202198	1	0.241966
342.5	0.0301099	1	0.239967
343	0.0404396	1	0.230156
343.5	0.0496703	1	0.207204
344	0.0591209	1	0.183605
344.5	0.0683516	1	0.15844
345	0.0762637	1	0.136889
345.5	0.0830769	1	0.128871
346	0.0892308	1	0.120602
346.5	0.0936264	1	0.110666
347	0.0973626	1	0.100334
347.5	0.0989011	1	0.0828577
348	0.1	1	0.0653814
348.5	0.10044	1	0.0720783
349	0.0997802	1	0.0795588
349.5	0.0973626	1	0.0973313
350	0.0951648	1	0.116394
350.5	0.0907692	1	0.135457
351	0.0857143	1	0.183257
351.5	0.0795604	1	0.237701
352	0.0727473	1	0.309262
352.5	0.0659341	1	0.38774
353	0.0593407	1	0.49139
353.5	0.0505495	1	0.610572
354	0.0428571	1	0.738122
354.5	0.0336264	1	0.873513
355	0.023956	1	1.00488
355.5	0.0142857	1	1.13059
356	0.00417582	1	1.24225
356.5	-0.00659341	1	1.32478
357	-0.0158242	1	1.40062
357.5	-0.0265934	1	1.45215
358	-0.0362637	1	1.49683
358.5	-0.0454945	1	1.49715
359	-0.0551648	1	1.49532
359.5	-0.0643956	1	1.45501
360	-0.0725275	1	1.4147
360.5	-0.0813187	1	1.34447
361	-0.0872527	1	1.27341
361.5	-0.0923077	1	1.21949
362	-0.0967033	1	1.16761
362.5	-0.0995604	1	1.11573
363	-0.100879	1	1.0449
363.5	-0.102198	1	0.972709
364	-0.101099	1	0.914252
364.5	-0.0997802	1	0.858075
365	-0.0971429	1	0.808221
365.5	-0.0934066	1	0.760176
366	-0.0885714	1	0.72164
366.5	-0.0830769	1	0.687273
367	-0.0751648	1	0.650992
367.5	-0.0681319	1	0.613522
368	-0.0608791	1	0.582717
368.5	-0.0527473	1	0.557612
369	-0.043956	1	0.520774
369.5	-0.0345055	1	0.469882
370	-0.0246154	1	0.423748
370.5	-0.0149451	1	0.385553
371	-0.00395604	1	0.34604
371.5	0.00703297	1	0.303156
372	0.018022	1	0.263903
372.5	0.029011	1	0.240229
373	0.0386813	1	0.217836
373.5	0.0485714	1	0.205955
374	0.058022	-1	0.194074
374.5	0.0668132	-1	0.181967
375	0.0751648	-1	0.165389
375.5	0.0828571	-1	0.148811
376	0.0883516	-1	0.149472
376.5	0.0945055	-1	0.151261
377	0.0984615	-1	0.147938
377.5	0.101319	-1	0.143757
378	0.102857	-1	0.142086
378.5	0.102637	-1	0.141188
379	0.100879	-1	0.138287
379.5	0.0997802	-1	0.134348
380	0.0962637	-1	0.150362
380.5	0.0920879	-1	0.181076
381	0.0874725	-1	0.229396
381.5	0.081978	-1	0.295735
382	0.0753846	-1	0.367559
382.5	0.0683516	-1	0.447413
383	0.0589011	-1	0.52971
383.5	0.0496703	-1	0.617061
384	0.0404396	-1	0.704342
384.5	0.0301099	-1	0.791408
385	0.02	-1	0.874796
385.5	0.0103297	-1	0.936289
386	0	-1	0.997782
386.5	-0.00967033	-1	1.05809
387	-0.0193407	-1	1.11209
387.5	-0.0296703	-1	1.16312
388	-0.0395604	-1	1.17581
388.5	-0.0494505	-1	1.18849
389	-0.0582418	-1	1.16712
389.5	-0.0657143	-1	1.14539
390	-0.0723077	-1	1.11369
390.5	-0.0789011	-1	1.08103
391	-0.0841758	-1	1.03715
391.5	-0.0892308	-1	0.991028
392	-0.0931868	-1	0.941489
392.5	-0.0964835	-1	0.89082
393	-0.0993407	-1	0.834697
393.5	-0.101099	-1	0.775856
394	-0.101099	-1	0.721749
394.5	-0.10022	-1	0.670942
395	-0.0969231	-1	0.6281
395.5	-0.0931868	-1	0.592993
396	-0.0883516	-1	0.561899
396.5	-0.0824176	-1	0.536142
397	-0.0758242	-1	0.514308
397.5	-0.0687912	-1	0.499735
398	-0.06	-1	0.485161
398.5	-0.0516484	-1	0.469472
399	-0.0424176	-1	0.451182
399.5	-0.0325275	-1	0.433483
400	-0.0226374	-1	0.417891
400.5	-0.0123077	-1	0.401398
401	-0.00131868	-1	0.37931
401.5	0.00857143	-1	0.357033
402	0.0189011	-1	0.331805
402.5	0.0294505	-1	0.306577
403	0.0386813	-1	0.278001
403.5	0.0485714	-1	0.249359
404	0.058022	-1	0.232545
404.5	0.0663736	-1	0.21704
405	0.0740659	-1	0.206187
405.5	0.0808791	-1	0.196452
406	0.0863736	-1	0.188444
406.5	0.0925275	-1	0.181145
407	0.0958242	-1	0.173877
407.5	0.098022	-1	0.166628
408	0.0995604	-1	0.163069
408.5	0.1	-1	0.162604
409	0.0991209	-1	0.168848
409.5	0.0973626	-1	0.182964
410	0.0934066	-1	0.19708
410.5	0.0898901	-1	0.219984
411	0.0859341	-1	0.256339
411.5	0.0808791	-1	0.327424
412	0.0747253	-1	0.479165
412.5	0.0681319	-1	0.609061
413	0.06	-1	0.659573
413.5	0.052967	-1	0.722159
414	0.0443956	-1	0.86029
414.5	0.0345055	-1	0.992119
415	0.0248352	-1	1.02086
415.5	0.0147253	1	1.04961
416	0.00461538	1	1.16592
416.5	-0.00527473	1	1.28612
417	-0.0167033	1	1.3133
417.5	-0.0276923	1	1.32605
418	-0.038022	1	1.26913
418.5	-0.0483516	1	1.1925
419	-0.0571429	1	1.10397
419.5	-0.0659341	1	1.01024
420	-0.0747253	1	0.902831
420.5	-0.0813187	1	0.78673
421	-0.0865934	1	0.713718
421.5	-0.0914286	1	0.68061
422	-0.0953846	1	0.647501
422.5	-0.0986813	1	0.608252
423	-0.100879	1	0.560274
423.5	-0.101319	1	0.517128
424	-0.101978	1	0.484119
424.5	-0.101099	1	0.451093
425	-0.0984615	1	0.418008
425.5	-0.0951648	1	0.386209
426	-0.0903297	1	0.361535
426.5	-0.0837363	1	0.337722
427	-0.0767033	1	0.324682
427.5	-0.069011	1	0.311641
428	-0.0608791	1	0.300007
428.5	-0.0527473	1	0.288383
429	-0.0430769	1	0.278416
429.5	-0.0331868	1	0.268607
430	-0.0235165	1	0.255516
430.5	-0.0118681	1	0.241752
431	-0.000879121	1	0.234527
431.5	0.0101099	1	0.229501
432	0.0210989	1	0.223449
432.5	0.030989	1	0.216887
433	0.0402198	1	0.211978
433.5	0.0496703	1	0.208325
434	0.0578022	1	0.204672
434.5	0.0661538	1	0.198731
435	0.0740659	1	0.190762
435.5	0.0808791	1	0.181763
436	0.087033	1	0.171389
436.5	0.0927473	1	0.162591
437	0.096044	1	0.156852
437.5	0.0989011	1	0.157744
438	0.10044	1	0.177906
438.5	0.100879	1	0.199865
439	0.100659	1	0.230594
439.5	0.0995604	1	0.261349
440	0.0964835	1	0.292401
440.5	0.092967	1	0.323453
441	0.0883516	1	0.351323
441.5	0.0832967	1	0.379192
442	0.0771429	1	0.420018
442.5	0.0698901	1	0.461976
443	0.0615385	1	0.506933
443.5	0.0527473	1	0.552471
444	0.0435165	1	0.603733
444.5	0.0336264	1	0.656846
445	0.0232967	1	0.700441
445.5	0.0125275	1	0.739169
446	0.00241758	1	0.777896
446.5	-0.00835165	1	0.828983
447	-0.0184615	1	0.887606
447.5	-0.0287912	1	0.929581
448	-0.0395604	1	0.957455
448.5	-0.0494505	1	0.966093
449	-0.0586813	1	0.952059
449.5	-0.0674725	1	0.92857
450	-0.0745055	1	0.88943
450.5	-0.0810989	1	0.839336
451	-0.087033	1	0.760962
451.5	-0.0914286	1	0.681604
452	-0.0953843	1	0.598187
452.5	-0.098899	1	0.515784
453	-0.100657	-1	0.441363
453.5	-0.101976	-1	0.367873
454	-0.101976	-1	0.328126
454.5	-0.100437	-1	0.28838
455	-0.0982397	-1	0.268159
455.5	-0.0949433	-1	0.249123
456	-0.0901099	-1	0.23574
456.5	-0.0852747	-1	0.223288
457	-0.0786813	-1	0.216368
457.5	-0.070989	-1	0.211058
458	-0.0628571	-1	0.205747
458.5	-0.0534069	-1	0.197848
459	-0.0435186	-1	0.188913
459.5	-0.0334087	-1	0.182492
460	-0.0221999	-1	0.177546
460.5	-0.0112109	-1	0.172828
461	-0.000441667	-1	0.1683
461.5	0.0105473	-1	0.163432
462	0.0213169	-1	0.158153
462.5	0.0318681	-1	0.151494
463	0.0428571	-1	0.142382
463.5	0.0514286	-1	0.131469
464	0.0602198	-1	0.115788
464.5	0.0681319	-1	0.102405
465	0.0753846	-1	0.0985609
465.5	0.081978	-1	0.0949595
466	0.0874725	-1	0.0932123
466.5	0.0912088	-1	0.0915126
467	0.0951648	-1	0.0912472
467.5	0.098022	-1	0.0909818
468	0.0995604	-1	0.0913567
468.5	0.100659	-1	0.0917654
469	0.1	-1	0.0991342
469.5	0.0982418	-1	0.10764
470	0.0964835	-1	0.116146
470.5	0.0925275	-1	0.144458
471	0.0872527	-1	0.177797
471.5	0.0815385	-1	0.215942
472	0.0742857	-1	0.255998
472.5	0.067033	-1	0.296487
473	0.0593407	-1	0.337252
473.5	0.0498901	-1	0.386448
474	0.0410989	-1	0.443693
474.5	0.0318681	-1	0.507651
475	0.0217582	-1	0.580603
475.5	0.0120879	-1	0.649641
476	0.00131868	-1	0.711388
476.5	-0.00945055	-1	0.76397
477	-0.0184615	-1	0.791366
477.5	-0.0281319	-1	0.811782
478	-0.0378022	-1	0.801488
478.5	-0.0465934	-1	0.790436
479	-0.0558242	-1	0.773059
479.5	-0.063956	-1	0.755267
480	-0.070989	-1	0.719689
480.5	-0.0793407	-1	0.684112
481	-0.0852747	-1	0.648852
481.5	-0.0903297	-1	0.613611
482	-0.0947253	-1	0.57837
482.5	-0.0975824	-1	0.536254
483	-0.0993407	1	0.493261
483.5	-0.101319	1	0.450392
484	-0.100659	1	0.407555
484.5	-0.0997802	1	0.378959
485	-0.0975824	1	0.356108
485.5	-0.0938462	1	0.329197
486	-0.089011	1	0.299738
486.5	-0.0835165	1	0.280331
487	-0.0756044	1	0.269818
487.5	-0.0685714	1	0.260956
488	-0.0608791	1	0.254157
488.5	-0.0527473	1	0.245039
489	-0.0446154	1	0.231836
489.5	-0.0351648	1	0.219409
490	-0.0246154	1	0.208973
490.5	-0.0149451	1	0.199906
491	-0.00395604	1	0.196667
491.5	0.00703297	1	0.194713
492	0.018022	1	0.203421
492.5	0.0296703	1	0.212029
493	0.0393407	1	0.216239
493.5	0.0485714	1	0.220448
494	0.058022	1	0.224589
494.5	0.0668132	1	0.220153
495	0.0751648	1	0.215718
495.5	0.0835165	1	0.202912
496	0.089011	1	0.189416
496.5	0.0945055	1	0.178382
497	0.0984615	1	0.167825
497.5	0.101319	1	0.166506
498	0.102418	1	0.168301
498.5	0.102198	1	0.180177
499	0.0997802	1	0.197111
499.5	0.0986813	1	0.221304
500	0.0958242	1	0.250773
500.5	0.0916484	1	0.287688
501	0.087033	1	0.332753
501.5	0.081978	1	0.37698
502	0.0753846	1	0.419891
502.5	0.0687912	1	0.46467
503	0.06	1	0.513871
503.5	0.0512088	1	0.564495
504	0.041978	1	0.620474
504.5	0.0320879	1	0.675085
505	0.021978	1	0.720286
505.5	0.0123077	1	0.765487
506	0.00153846	1	0.811643
506.5	-0.00813187	1	0.865978
507	-0.0182418	1	0.920164
507.5	-0.0285714	1	0.921158
508	-0.0389011	1	0.922153
508.5	-0.0487912	1	0.891845
509	-0.058022	1	0.858312
509.5	-0.0661538	1	0.811627
510	-0.0738462	1	0.762071
510.5	-0.0804396	1	0.715494
511	-0.0857143	1	0.669991
511.5	-0.0907692	1	0.622802
512	-0.0947253	1	0.574641
512.5	-0.0975824	1	0.520598
513	-0.10044	1	0.46175
513.5	-0.101099	1	0.407811
514	-0.101099	1	0.359623
514.5	-0.10022	1	0.315855
515	-0.0973626	1	0.279346
515.5	-0.0936264	1	0.256546
516	-0.0887912	1	0.266317
516.5	-0.0828571	1	0.274978
517	-0.0769231	1	0.279568
517.5	-0.0698901	1	0.284159
518	-0.0610989	1	0.28735
518.5	-0.0523077	1	0.286345
519	-0.0430769	1	0.282926
519.5	-0.0331868	1	0.265584
520	-0.0232967	1	0.248155
520.5	-0.012967	1	0.228843
521	-0.00197802	1	0.209531
521.5	0.00835165	1	0.200587
522	0.0186813	1	0.192284
522.5	0.0285714	1	0.176036
523	0.0384615	1	0.158318
523.5	0.049011	1	0.153273
524	0.0578022	-1	0.152277
524.5	0.0661538	-1	0.150278
525	0.0738462	-1	0.147737
525.5	0.0806593	-1	0.134609
526	0.0872527	-1	0.113216
526.5	0.0927473	-1	0.0905625
527	0.0967033	-1	0.0665283
527.5	0.10022	-1	0.0495114
528	0.101758	-1	0.0433239
528.5	0.102418	-1	0.0428935
529	0.102198	-1	0.0552297
529.5	0.100659	-1	0.0675659
530	0.0971429	-1	0.0880198
530.5	0.0936264	-1	0.122694
531	0.0883516	-1	0.157581
531.5	0.0828571	-1	0.193005
532	0.0767033	-1	0.231257
532.5	0.069011	-1	0.280871
533	0.0602198	-1	0.330125
533.5	0.0520879	-1	0.376656
534	0.0421978	-1	0.423012
534.5	0.0325275	-1	0.463484
535	0.0226374	-1	0.503955
535.5	0.0118681	-1	0.536361
536	0.00178813	-1	0.568331
536.5	-0.00854154	-1	0.586428
537	-0.0193108	-1	0.602016
537.5	-0.0283218	-1	0.608323
538	-0.0382119	-1	0.611582
538.5	-0.0485415	-1	0.599354
539	-0.0573327	-1	0.579448
539.5	-0.0657143	-1	0.550713
540	-0.0740659	-1	0.515163
540.5	-0.0806593	-1	0.47829
541	-0.0874725	-1	0.43989
541.5	-0.0923077	-1	0.403741
542	-0.0956044	-1	0.371849
542.5	-0.0991508	-1	0.341311
543	-0.100909	-1	0.314667
543.5	-0.100909	-1	0.285391
544	-0.101568	-1	0.243245
544.5	-0.100469	-1	0.201894
545	-0.0978321	-1	0.169728
545.5	-0.0945354	-1	0.137561
546	-0.0894505	-1	0.115789
546.5	-0.083956	-1	0.0941478
547	-0.0773626	-1	0.0886078
547.5	-0.069011	-1	0.0852303
548	-0.0609455	-1	0.0755165
548.5	-0.0521543	-1	0.0641588
549	-0.042484	-1	0.0587601
549.5	-0.0330335	-1	0.0557482
550	-0.0231433	-1	0.054866
550.5	-0.0121543	-1	0.0552248
551	-0.00226422	-1	0.0573729
551.5	0.00879121	-1	0.060965
552	0.0191209	-1	0.0560392
552.5	0.029011	-1	0.0415696
553	0.0393407	-1	0.026694
553.5	0.0492308	-1	0.0111823
554	0.0573626	-1	-0.00664992
554.5	0.0662203	-1	-0.0297057
555	0.073473	-1	-0.0505473
555.5	0.0802862	-1	-0.0635017
556	0.0868796	-1	-0.0739693
556.5	0.0919346	-1	-0.069084
557	0.0952313	-1	-0.0637079
557.5	0.0991873	-1	-0.0508029
558	0.100659	-1	-0.0378979
558.5	0.101758	-1	-0.0194874
559	0.101538	-1	-0.000964527
559.5	0.1	-1	0.0193387
560	0.096892	-1	0.0398327
560.5	0.0940349	-1	0.0722731
561	0.0883206	-1	0.107608
561.5	0.0832657	-1	0.156306
562	0.0764525	1	0.210384
562.5	0.0683206	1	0.264189
563	0.059969	1	0.317834
563.5	0.0512088	1	0.369168
564	0.0406593	1	0.418647
564.5	0.0314286	1	0.461739
565	0.0206593	1	0.497759
565.5	0.0105495	1	0.533779
566	0.000659341	1	0.578672
566.5	-0.0100788	1	0.629176
567	-0.0201887	1	0.678315
567.5	-0.0291997	1	0.726258
568	-0.039969	1	0.759438
568.5	-0.0487602	1	0.774606
569	-0.0575514	1	0.783515
569.5	-0.0656832	1	0.781693
570	-0.0727473	1	0.771515
570.5	-0.0786813	1	0.740898
571	-0.0852747	1	0.708641
571.5	-0.0892308	1	0.669494
572	-0.0937057	1	0.62878
572.5	-0.0970024	1	0.575388
573	-0.0987607	1	0.522055
573.5	-0.100079	1	0.472944
574	-0.100739	1	0.423833
574.5	-0.0987607	1	0.359646
575	-0.0970024	1	0.293965
575.5	-0.0931868	1	0.261022
576	-0.0883516	1	0.235768
576.5	-0.0828571	1	0.223494
577	-0.0762637	1	0.216896
577.5	-0.0685714	1	0.210298
578	-0.0613187	1	0.22221
578.5	-0.0520085	1	0.241838
579	-0.0427778	1	0.241432
579.5	-0.0333272	1	0.229035
580	-0.0227778	1	0.211615
580.5	-0.0124481	1	0.189981
581	-0.00211844	1	0.167486
581.5	0.00931013	1	0.143961
582	0.0191209	1	0.119208
582.5	0.029011	1	0.0924297
583	0.0393407	1	0.0702171
583.5	0.0479121	1	0.0586992
584	0.0573626	1	0.0470168
584.5	0.0661538	1	0.034728
585	0.0734066	1	0.0242964
585.5	0.0810989	1	0.0261839
586	0.0872527	1	0.0278734
586.5	0.0916484	1	0.0241319
587	0.0962637	1	0.0203905
587.5	0.0984615	1	0.0270992
588	0.0995604	1	0.034395
588.5	0.101099	1	0.0476329
589	0.10044	1	0.0617997
589.5	0.0986813	1	0.0781421
590	0.0964835	1	0.0950882
590.5	0.0923077	1	0.125329
591	0.0883516	1	0.161804
591.5	0.0832967	1	0.199983
592	0.0756044	1	0.23949
592.5	0.0683516	1	0.282972
593	0.0606593	1	0.331148
593.5	0.0516484	1	0.377816
594	0.0430769	1	0.421982
594.5	0.0331868	1	0.466851
595	0.0233846	1	0.51341
595.5	0.0135531	1	0.556255
596	0.00351648	1	0.584834
596.5	-0.00649351	1	0.609009
597	-0.0190476	1	0.602743
597.5	-0.0293878	1	0.595797
598	-0.0394286	1	0.573434
598.5	-0.0466667	1	0.551072
599	-0.0533333	1	0.534193
599.5		1	0.517527

## Sheet: Fig 2D
animal #1		animal #2				animal #3				animal #4				animal #5
same as in C		Time (s)	Change in temperature (Celsius/s)	AFD activity (dR/R0)		Time (s)	Change in temperature (Celsius/s)	AFD activity (dR/R0)		Time (s)	Change in temperature (Celsius/s)	AFD activity (dR/R0)		Time (s)	Change in temperature (Celsius/s)	AFD activity (dR/R0)
		0.5	0	0.0662143		0.5	0	0.00262741		0.5	0	3.33547		0.5	0	0.507836
		1	-0.0247403	0.0877375		1	0.0286364	0.01806		1	-0.00993506	3.40022		1	0.02	0.487143
		1.5	-0.00525974	0.0940041		1.5	0.00136364	-0.00212677		1.5	-0.0200649	3.34238		1.5	0	0.464177
		2	0.03	0.0893024		2	0	-0.0222089		2	0	3.26038		2	-0.02	0.442184
		2.5	0	0.0522113		2.5	0	-0.0369534		2.5	0.03	3.29356		2.5	0	0.422723
		3	0	0.0198703		3	-0.03	-0.0174335		3	0.02	3.33026		3	0	0.390482
		3.5	0	-0.0121468		3.5	0.03	-0.0129484		3.5	-0.02	3.20956		3.5	0	0.36606
		4	0	-0.00662109		4	0	-0.00118043		4	0	3.10313		4	0	0.41366
		4.5	0	0.00430937		4.5	0	0.0296829		4.5	0	2.97095		4.5	0.02	0.480551
		5	0	0.000749495		5	0	0.0802399		5	-0.03	2.71699		5	-0.02	0.574702
		5.5	0	-0.00579778		5.5	0.02	0.128969		5.5	0	2.4821		5.5	0	0.601148
		6	0	-0.0036593		6	0	0.0952247		6	0.03	2.33028		6	0.02	0.569862
		6.5	0	0.0274363		6.5	-0.00766234	0.0754926		6.5	0	2.18738		6.5	-0.02	0.457193
		7	0.02	0.0444854		7	-0.0123377	0.0705367		7	-0.03	2.10032		7	0	0.386168
		7.5	0.00720779	0.0488158		7.5	0	0.104439		7.5	0	1.94662		7.5	0	0.379773
		8	0.0227922	0.0455846		8	0	0.118137		8	-0.07	1.9545		8	0.02	0.447462
		8.5	0.0268182	0.0626959		8.5	0	0.132035		8.5	-0.1	1.80474		8.5	-0.02	0.433738
		9	0.0431818	0.0956667		9	0.017013	0.17446		9	-0.07	1.64959		9	0.02	0.324319
		9.5	0.0264286	0.143221		9.5	0.00298701	0.200326		9.5	-0.03	1.4467		9.5	0.03	0.198908
		10	0.0435714	0.251633		10	0.05	0.186244		10	-0.02	1.29772		10	0.02	0.193531
		10.5	0.05	0.476022		10.5	0.03	0.175277		10.5	0	1.19781		10.5	0.03	0.287735
		11	0.05	0.803214		11	0.02	0.210999		11	-0.03	1.11408		11	0.04	0.382917
		11.5	0.05	1.10674		11.5	0.02	0.281298		11.5	0.03	1.03424		11.5	0.05	0.483857
		12	0.05	1.381		12	0.0462338	0.341752		12	0	0.947268		12	0.03	0.555926
		12.5	0.08	1.68735		12.5	0.0398701	0.412531		12.5	-0.03	0.897541		12.5	0.05	0.735136
		13	0.04	2.13174		13	0.0438961	0.502024		13	0	0.880347		13	0.05	0.982381
		13.5	0.05	2.62359		13.5	0.05	0.582939		13.5	0.03	0.840156		13.5	0.057013	1.27688
		14	0.08	2.9625		14	0.05	0.612327		14	0	0.79221		14	0.0598701	1.51942
		14.5	0.052987	3.20796		14.5	0.05	0.618297		14.5	-0.03	0.787324		14.5	0.0531169	1.67761
		15	0.067013	3.54263		15	0.0431818	0.677618		15	0	0.803295		15	0.0666234	1.78187
		15.5	0.08	4.06833		15.5	0.0268182	0.825473		15.5	0.03	0.787652		15.5	0.0533766	1.8317
		16	0.07	4.58674		16	0.0651948	1.02613		16	0	0.705289		16	0.0745455	1.85226
		16.5	0.0524675	4.95146		16.5	0.0548052	1.2111		16.5	0	0.612693		16.5	0.0554545	1.98374
		17	0.0598701	5.31531		17	0.05	1.3651		17	0	0.566217		17	0.07	2.41171
		17.5	0.0576623	5.8006		17.5	0.08	1.45647		17.5	0	0.53828		17.5	0.08	2.86763
		18	0.08	6.09142		18	0.05	1.5195		18	-0.03	0.533235		18	0.04	3.35434
		18.5	0.05	6.3133		18.5	0.0545455	1.66426		18.5	0	0.540719		18.5	0.08	3.61321
		19	0.05	6.15355		19	0.0598701	1.84018		19	0.03	0.54722		19	0.0655844	3.92191
		19.5	0.0425325	6.31783		19.5	0.0555844	2.14704		19.5	0	0.50886		19.5	0.0544156	4.23499
		20	0.0774675	6.24369		20	0.0641558	2.46241		20	0	0.469779		20	0.05	4.5606
		20.5	0.05	6.51024		20.5	0.0558442	2.74494		20.5	0	0.403388		20.5	0.08	4.92712
		21	0.0369481	6.7227		21	0.05	2.96118		21	0.02	0.394757		21	0.04	5.38095
		21.5	0.0330519	7.10022		21.5	0.08	2.97985		21.5	0.0169481	0.354224		21.5	0.0572078	5.98839
		22	0.05	7.34539		22	0.0404545	3.25658		22	0.0130519	0.358438		22	0.0427922	6.3471
		22.5	0.02	7.2026		22.5	0.0295455	3.57882		22.5	0.02	0.416968		22.5	0.05	6.24032
		23	0.03	7.41596		23	0.05	4.23423		23	0.03	0.522202		23	0.05	5.92958
		23.5	0.02	7.33237		23.5	0.05	4.54834		23.5	0.02	0.709205		23.5	0.02	6.03105
		24	0.03	7.65779		24	0.05	5.06141		24	0.05	0.873429		24	0.03	6.5248
		24.5	0	7.2543		24.5	0.0244805	5.50241		24.5	0.02	1.12206		24.5	0.05	7.09004
		25	0	7.35166		25	0.0455195	6.22137		25	0.0303896	1.36696		25	0.02	7.32573
		25.5	0.02	7.04323		25.5	0.02	6.90827		25.5	0.0496104	1.74371		25.5	0.03	7.39259
		26	0	6.57123		26	0.0425974	7.51458		26	0.05	2.10831		26	0	7.27945
		26.5	-0.02	6.09009		26.5	0.0374026	8.17255		26.5	0.035	2.53565		26.5	0	7.09647
		27	-0.0146104	6.03648		27	0	8.65158		27	0.035	3.02256		27	0.02	6.90393
		27.5	-0.0153896	6.26274		27.5	0.02	8.98804		27.5	0.05	3.48808		27.5	-0.02	6.71815
		28	-0.02	6.41975		28	0.03	8.98431		28	0.05	3.92494		28	0	6.43101
		28.5	-0.03	6.12141		28.5	0	9.06201		28.5	0.05	4.28653		28.5	-0.03	5.94894
		29	-0.0338312	6.05744		29	0.0118182	9.04972		29	0.05	4.51383		29	0	5.5085
		29.5	-0.0361688	5.92464		29.5	0.00818182	9.13551		29.5	0.05	4.7376		29.5	-0.02	5.07976
		30	-0.05	5.86948		30	0	9.24143		30	0.07	5.23589		30	-0.03	4.77168
		30.5	-0.05	5.83685		30.5	0	9.24046		30.5	0.05	5.93482		30.5	-0.05	4.58776
		31	-0.05	5.69037		31	-0.02	8.71997		31	0.05	6.96808		31	-0.02	4.55867
		31.5	-0.05	5.62397		31.5	-0.03	7.80517		31.5	0.05	7.53286		31.5	-0.05	4.42891
		32	-0.07	5.68848		32	-0.011039	7.12072		32	0.0485714	7.95547		32	-0.05	4.16958
		32.5	-0.05	5.8278		32.5	-0.0103247	6.68352		32.5	0.0340909	8.10416		32.5	-0.05	3.8221
		33	-0.0581818	5.74012		33	-0.0486364	6.4068		33	0.0673377	8.13189		33	-0.05	3.52244
		33.5	-0.0618182	5.33475		33.5	-0.03	5.98269		33.5	0.05	8.21346		33.5	-0.07	3.25476
		34	-0.08	4.96857		34	-0.0305195	5.52842		34	0.0470779	8.36474		34	-0.05	3.05164
		34.5	-0.05	4.70522		34.5	-0.0394805	5.33383		34.5	0.0348052	8.69105		34.5	-0.07	2.83322
		35	-0.07	4.31129		35	-0.05	5.21019		35	0.0681169	8.32928		35	-0.0412987	2.59051
		35.5	-0.07	3.84516		35.5	-0.05	5.26027		35.5	0.0314935	7.42777		35.5	-0.0587013	2.3533
		36	-0.08	3.56458		36	-0.035	5.17875		36	0.0385065	6.81891		36	-0.08	2.22493
		36.5	-0.05	3.32184		36.5	-0.035	4.92208		36.5	0.05	7.0478		36.5	-0.0413636	2.14257
		37	-0.0571429	3.03699		37	-0.07	4.7637		37	0.0459091	7.90027		37	-0.0786364	2.08788
		37.5	-0.0928571	2.75095		37.5	-0.05	4.74019		37.5	0.0348052	8.48684		37.5	-0.0506494	2.07706
		38	-0.04	2.54738		38	-0.05	4.65199		38	0.0362987	8.62159		38	-0.0993506	1.9907
		38.5	-0.0751299	2.36319		38.5	-0.05	4.34519		38.5	0.032987	8.67389		38.5	-0.0503896	1.91225
		39	-0.0348052	2.16839		39	-0.08	3.91514		39	0.02	8.83961		39	-0.0598701	1.7849
		39.5	-0.0865584	2.04259		39.5	-0.0486364	3.60797		39.5	0.02	9.08854		39.5	-0.0598701	1.59987
		40	-0.0398701	1.94927		40	-0.0413636	3.47532		40	0.03	8.6502		40	-0.0698701	1.36623
		40.5	-0.0436364	1.78595		40.5	-0.05	3.3502		40.5	0.02	8.17868		40.5	-0.05	1.08153
		41	-0.05	1.56027		41	-0.0887013	3.19325		41	0.03	7.99232		41	-0.08	1.00859
		41.5	-0.04	1.37329		41.5	-0.0598701	3.04862		41.5	0.02	8.36918		41.5	-0.05	0.985704
		42	-0.0358442	1.29204		42	-0.0514286	2.94305		42	0	8.75713		42	-0.05	0.916599
		42.5	-0.0141558	1.2462		42.5	-0.05	2.80664		42.5	0.03	8.53631		42.5	-0.049026	0.827695
		43	-0.05	1.21524		43	-0.08	2.5317		43	0	8.03521		43	-0.020974	0.698195
		43.5	-0.03	1.17444		43.5	-0.0380519	2.23046		43.5	0	7.69039		43.5	-0.02	0.716691
		44	-0.00532468	1.09708		44	-0.0519481	2.03376		44	0	7.67971		44	-0.05	0.808637
		44.5	-0.0146753	1.01726		44.5	-0.05	1.90757		44.5	0	7.82392		44.5	-0.03	0.854392
		45	0	0.917443		45	-0.05	1.81357		45	-0.03	7.86773		45	-0.02	0.836602
		45.5	0	0.841214		45.5	-0.05	1.74496		45.5	0	7.92164		45.5	-0.03	0.7298
		46	-0.03	0.79161		46	-0.05	1.68929		46	-0.0149351	7.47641		46	-0.02	0.6936
		46.5	0.03	0.762102		46.5	-0.05	1.61953		46.5	-0.00506494	7.20957		46.5	0	0.666669
		47	0	0.732337		47	-0.03	1.5044		47	-0.03	6.85496		47	0	0.61845
		47.5	0.0416234	0.682389		47.5	-0.037013	1.28614		47.5	-0.02	6.86854		47.5	0	0.603739
		48	0.0126623	0.618188		48	-0.032987	1.08574		48	-0.03	6.51077		48	0.02	0.564183
		48.5	0.0369481	0.56329		48.5	-0.02	0.829669		48.5	-0.02	6.50811		48.5	0	0.485536
		49	0.0287662	0.539873		49	-0.03	0.722551		49	-0.041039	6.35063		49	0.03	0.396801
		49.5	0.0438961	0.501842		49.5	-0.02	0.669121		49.5	-0.028961	6.53807		49.5	0.02	0.375907
		50	0.0261039	0.459366		50	-0.03	0.699387		50	-0.03	6.59197		50	0.03	0.356853
		50.5	0.05	0.382668		50.5	0	0.654289		50.5	-0.05	6.70798		50.5	0.02	0.39104
		51	0.05	0.314326		51	-0.02	0.60301		51	-0.05	6.7505		51	0.0371429	0.408318
		51.5	0.0700649	0.252474		51.5	0	0.599873		51.5	-0.04	6.64068		51.5	0.0328571	0.49064
		52	0.0599351	0.252035		52	0	0.628662		52	-0.0432468	6.56786		52	0.0603247	0.500225
		52.5	0.05	0.264728		52.5	0	0.620787		52.5	-0.0567532	6.64821		52.5	0.0396753	0.452584
		53	0.07	0.369897		53	0	0.526329		53	-0.042987	6.74336		53	0.05	0.35367
		53.5	0.0628571	0.426643		53.5	0.02	0.41109		53.5	-0.0398701	6.50748		53.5	0.0747403	0.276077
		54	0.0571429	0.543747		54	0	0.287284		54	-0.0471429	5.98381		54	0.0552597	0.278489
		54.5	0.05	0.62157		54.5	0.03	0.227282		54.5	-0.07	5.4189		54.5	0.0443506	0.311741
		55	0.1	0.75121		55	0.02	0.194926		55	-0.0424675	5.03535		55	0.0256494	0.38407
		55.5	0.0685065	0.945971		55.5	0.03	0.180402		55.5	-0.031039	4.64039		55.5	0.093961	0.487963
		56	0.0614935	1.03206		56	0.02	0.157072		56	-0.0648052	4.19317		56	0.0618831	0.605406
		56.5	0.0581169	1.07152		56.5	0.05	0.14326		56.5	-0.0637662	3.78986		56.5	0.0641558	0.757693
		57	0.0638312	0.998133		57	0.0268182	0.153708		57	-0.0479221	3.45545		57	0.08	0.89905
		57.5	0.0680519	1.11086		57.5	0.0431818	0.170762		57.5	-0.0518182	3.11977		57.5	0.07	1.02292
		58	0.0525325	1.32345		58	0.0342857	0.179602		58	-0.0481818	2.80904		58	0.0553247	1.09323
		58.5	0.0474675	1.53778		58.5	0.0657143	0.166098		58.5	-0.07	2.53757		58.5	0.0646753	1.1133
		59	0.08	1.71657		59	0.05	0.136509		59	-0.0414286	2.37522		59	0.08	1.1725
		59.5	0.04	1.76502		59.5	0.0438961	0.121697		59.5	-0.0585714	2.20528		59.5	0.0649351	1.31305
		60	0.0517532	2.05103		60	0.0561039	0.159779		60	-0.02	1.99146		60	0.0550649	1.56815
		60.5	0.0482468	2.23444		60.5	0.05	0.244822		60.5	-0.0515584	1.77372		60.5	0.072013	1.86888
		61	0.08	2.55485		61	0.05	0.333518		61	-0.0484416	1.58625		61	0.047987	2.06715
		61.5	0.02	2.62176		61.5	0.05	0.484989		61.5	-0.05	1.50155		61.5	0.05	2.27071
		62	0.05	2.80361		62	0.07	0.61529		62	-0.05	1.44756		62	0.05	2.61864
		62.5	0.02	2.89343		62.5	0.05	0.822494		62.5	-0.03	1.35826		62.5	0.0441558	3.08454
		63	0.0303896	3.19416		63	0.08	0.88081		63	-0.0103896	1.31474		63	0.0358442	3.51776
		63.5	0.0196104	3.42964		63.5	0.05	0.871807		63.5	-0.0396104	1.20845		63.5	0.04	3.72573
		64	0.03	3.75816		64	0.07	0.906119		64	-0.04	1.19162		64	0.0337662	3.83771
		64.5	0	3.98039		64.5	0.05	1.04288		64.5	-0.03	1.08847		64.5	0.0366883	3.72089
		65	0.02	4.18349		65	0.05	1.23807		65	-0.02	0.944866		65	0.0295455	3.39805
		65.5	-0.00974026	4.36718		65.5	0.05	1.42844		65.5	-0.03	0.871901		65.5	0.0200649	3.37104
		66	-0.0102597	4.58681		66	0.07	1.55621		66	-0.02	0.792869		66	0.00993506	3.55412
		66.5	0	4.90346		66.5	0.05	1.6807		66.5	-0.03	0.748553		66.5	0	3.85974
		67	0	5.0833		67	0.05	1.74999		67	0	0.67868		67	0.02	3.96356
		67.5	-0.03	5.22067		67.5	0.0418182	1.80039		67.5	0	0.623976		67.5	-0.02	3.97095
		68	-0.02	5.24832		68	0.0581818	1.96527		68	-0.02	0.598321		68	0	4.26144
		68.5	-0.03	5.39397		68.5	0.05	2.16057		68.5	0	0.583626		68.5	-0.0187013	4.43648
		69	-0.0482468	5.41453		69	0.0221429	2.41882		69	0	0.609574		69	-0.0112987	4.42035
		69.5	-0.0217532	5.48318		69.5	0.0478571	2.59391		69.5	0	0.602118		69.5	-0.02	4.26216
		70	-0.05	5.48848		70	0.05	2.7735		70	0.02	0.554822		70	-0.0320779	3.93656
		70.5	-0.05	5.53228		70.5	0.02	2.92587		70.5	0	0.487387		70.5	-0.0179221	3.78226
		71	-0.0683117	5.40253		71	0.0309091	3.1885		71	0.03	0.417821		71	-0.0518182	3.52119
		71.5	-0.0398701	5.0589		71.5	0.0190909	3.47316		71.5	0	0.380747		71.5	-0.0481818	3.5989
		72	-0.0618182	4.58059		72	0.05	3.69045		72	0.02	0.34459		72	-0.05	3.40718
		72.5	-0.0579221	4.11002		72.5	0	3.75972		72.5	0.03	0.308334		72.5	-0.02	3.1369
		73	-0.0620779	3.80835		73	0.000584416	3.76824		73	0.02	0.286295		73	-0.08	2.76368
		73.5	-0.0614935	3.65657		73.5	0.0294156	3.84398		73.5	0.03	0.282469		73.5	-0.04	2.57305
		74	-0.0685065	3.52899		74	0	3.97827		74	0.04	0.281627		74	-0.0515584	2.41375
		74.5	-0.07	3.25847		74.5	0.02	4.09809		74.5	0.03	0.278919		74.5	-0.0784416	2.29274
		75	-0.05	2.93616		75	0	4.14209		75	0.05	0.266824		75	-0.07	2.18602
		75.5	-0.07	2.69451		75.5	-0.02	4.28485		75.5	0.02	0.284627		75.5	-0.05	2.12245
		76	-0.08	2.6048		76	-0.0294156	4.56646		76	0.05	0.291994		76	-0.08	2.10174
		76.5	-0.0568831	2.51162		76.5	-0.000584416	4.75751		76.5	0.05	0.296768		76.5	-0.07	2.00004
		77	-0.0598701	2.32308		77	-0.02	4.6029		77	0.05	0.301479		77	-0.0502597	1.87416
		77.5	-0.0631818	2.13625		77.5	-0.03	4.2905		77.5	0.03	0.351488		77.5	-0.0697403	1.74611
		78	-0.0600649	1.96956		78	-0.02	4.03023		78	0.0564935	0.516676		78	-0.05	1.55659
		78.5	-0.08	1.85596		78.5	-0.0388312	4.12632		78.5	0.0580519	0.792013		78.5	-0.1	1.3926
		79	-0.05	1.69745		79	-0.0111688	4.16442		79	0.0348052	1.11412		79	-0.05	1.28537
		79.5	-0.0561039	1.59276		79.5	-0.05	4.12219		79.5	0.0406494	1.38747		79.5	-0.0596104	1.23956
		80	-0.0438961	1.5459		80	-0.05	4.12242		80	0.08	1.60431		80	-0.0598701	1.17088
		80.5	-0.07	1.46473		80.5	-0.0324675	4.17129		80.5	0.05	1.81814		80.5	-0.0645455	1.09099
		81	-0.03	1.341		81	-0.0375325	4.01675		81	0.05	1.99742		81	-0.0648052	0.985457
		81.5	-0.04	1.16197		81.5	-0.0580519	3.83694		81.5	0.05	2.19108		81.5	-0.0511688	0.894066
		82	-0.03	1.05134		82	-0.0598701	3.62072		82	0.0554545	2.39757		82	-0.0484416	0.764232
		82.5	-0.05	0.95029		82.5	-0.0398701	3.58542		82.5	0.0345455	2.7807		82.5	-0.0515584	0.643897
		83	-0.02	0.833523		83	-0.0598701	3.4353		83	0.0577922	3.17137		83	-0.02	0.57391
		83.5	-0.03	0.695894		83.5	-0.0636364	3.18151		83.5	0.0722078	3.44433		83.5	-0.05	0.505722
		84	-0.0149351	0.631877		84	-0.0648052	2.89585		84	0.05	3.71771		84	-0.02	0.499904
		84.5	-0.00506494	0.607276		84.5	-0.0538961	2.65856		84.5	0.0422078	3.94352		84.5	-0.03	0.477625
		85	0	0.607994		85	-0.04	2.49507		85	0.0348052	4.22934		85	-0.02	0.491047
		85.5	0	0.542386		85.5	-0.0605195	2.40467		85.5	0.0648052	4.54891		85.5	-0.03	0.454417
		86	0	0.499469		86	-0.0694805	2.3481		86	0.0325974	4.929		86	-0.02	0.401012
		86.5	0	0.48133		86.5	-0.05	2.2201		86.5	0.0455844	5.39961		86.5	0	0.371839
		87	0.0141558	0.455984		87	-0.05	2.05603		87	0.0262338	5.75744		87	0	0.353691
		87.5	0.0118831	0.38927		87.5	-0.0797403	1.85522		87.5	0.0437662	6.03826		87.5	0	0.321217
		88	0.043961	0.337044		88	-0.0366234	1.72118		88	0.05	6.13125		88	0	0.29819
		88.5	0.03	0.305503		88.5	-0.0536364	1.61585		88.5	0.03	6.10844		88.5	0.02	0.27621
		89	0.02	0.340487		89	-0.05	1.54192		89	0.02	5.90189		89	0.0257143	0.29027
		89.5	0.0335065	0.336913		89.5	-0.07	1.32693		89.5	0.0402597	5.94201		89.5	-0.0257143	0.277534
		90	0.0565584	0.357367		90	-0.0458442	1.12371		90	0.00974026	6.03596		90	0.05	0.264518
		90.5	0.0348052	0.316319		90.5	-0.0398701	1.00779		90.5	0.02	6.18164		90.5	0.05	0.282894
		91	0.0451299	0.29651		91	-0.0442857	1.04628		91	0.03	6.26996		91	0.03	0.317445
		91.5	0.05	0.282536		91.5	-0.0554545	1.05797		91.5	0.02	6.22049		91.5	0.04	0.349154
		92	0.08	0.277752		92	-0.0445455	0.951959		92	0.03	6.10934		92	0.05	0.34623
		92.5	0.05	0.247518		92.5	-0.0251948	0.889861		92.5	0	6.06565		92.5	0.05	0.356946
		93	0.0625974	0.27211		93	-0.0448052	0.829036		93	0	6.0974		93	0.05	0.408001
		93.5	0.0574026	0.334557		93.5	-0.02	0.802903		93.5	0	6.17275		93.5	0.058961	0.474027
		94	0.07	0.480412		94	-0.03	0.800857		94	0	6.26652		94	0.0648052	0.50243
		94.5	0.08	0.649507		94.5	-0.02	0.78024		94.5	0	6.31125		94.5	0.0562338	0.490242
		95	0.05	0.853101		95	-0.03	0.789344		95	-0.03	6.26932		95	0.0633766	0.532405
		95.5	0.07	0.975027		95.5	-0.02	0.774474		95.5	0	6.20505		95.5	0.0620779	0.663343
		96	0.08	1.02648		96	0	0.727209		96	-0.02	6.18881		96	0.0645455	0.858258
		96.5	0.07	1.12714		96.5	-0.03	0.68061		96.5	0	6.25938		96.5	0.0577922	1.02069
		97	0.05	1.34222		97	0	0.614615		97	-0.03	6.18427		97	0.0722078	1.11841
		97.5	0.07	1.51749		97.5	0.03	0.559385		97.5	-0.02	5.92373		97.5	0.0549351	1.1624
		98	0.0669481	1.55013		98	0	0.53602		98	-0.03	5.80608		98	0.0798701	1.31835
		98.5	0.0630519	1.59748		98.5	0.02	0.491774		98.5	-0.02	5.73563		98.5	0.0622078	1.40821
		99	0.05	1.72081		99	0.03	0.461273		99	-0.05	5.72263		99	0.072987	1.49353
		99.5	0.07	2.02785		99.5	0.00337662	0.393219		99.5	-0.02	5.5822		99.5	0.0542857	1.48408
		100	0.0361688	2.26952		100	0.0364935	0.373128		100	-0.05	5.4994		100	0.0869481	1.61765
		100.5	0.0638312	2.50622		100.5	0.0348052	0.38883		100.5	-0.03	5.38856		100.5	0.0587662	1.85591
		101	0.02	2.63072		101	0.0383117	0.39604		101	-0.05	5.18716		101	0.0338961	2.02536
		101.5	0.05	2.71201		101.5	0.00987013	0.394128		101.5	-0.04	4.98113		101.5	0.0561039	2.17194
		102	0.0353896	2.87695		102	0.0362338	0.367992		102	-0.0494805	4.61266		102	0.05	2.42196
		102.5	0.0346104	3.084		102.5	0.0309091	0.379638		102.5	-0.0398701	4.32028		102.5	0.05	2.81257
		103	0.03	3.23875		103	0.05	0.352185		103	-0.0606494	3.92158		103	0.03	3.03692
		103.5	0.02	3.34784		103.5	0.0323377	0.274488		103.5	-0.0390909	3.63007		103.5	0.04	3.018
		104	0.0397403	3.49312		104	0.0476623	0.263809		104	-0.0409091	3.28854		104	0.05	3.02008
		104.5	0.0102597	3.93887		104.5	0.0520779	0.302568		104.5	-0.05	3.03575		104.5	0.03	3.19448
		105	0	4.26178		105	0.0479221	0.340814		105	-0.0687013	2.80519		105	0.0128571	3.51269
		105.5	0	4.48811		105.5	0.0518182	0.356123		105.5	-0.0512987	2.52498		105.5	0.00714286	3.84055
		106	-0.02	4.44506		106	0.0557143	0.357964		106	-0.0476623	2.25511		106	0.03	4.16829
		106.5	0	4.38302		106.5	0.0624675	0.378955		106.5	-0.0523377	2.05574		106.5	0	4.43226
		107	-0.03	4.27805		107	0.0614286	0.423302		107	-0.05	1.92014		107	0	4.51088
		107.5	-0.02	4.24483		107.5	0.0585714	0.491627		107.5	-0.0580519	1.80546		107.5	0	4.51042
		108	-0.03	4.27311		108	0.0667532	0.613151		108	-0.0419481	1.65173		108	0	4.52157
		108.5	-0.02	4.40728		108.5	0.0642857	0.763677		108.5	-0.05	1.51824		108.5	-0.03	4.42129
		109	-0.03	4.50092		109	0.0798701	0.898621		109	-0.0676623	1.40469		109	0	4.38462
		109.5	-0.0383117	4.52567		109.5	0.0390909	1.03506		109.5	-0.0336364	1.32637		109.5	-0.02	4.32556
		110	-0.0398701	4.34384		110	0.05	1.17261		110	-0.0387013	1.22679		110	-0.0415584	4.28243
		110.5	-0.0418182	4.00274		110.5	0.05	1.29618		110.5	-0.05	1.12221		110.5	-0.0384416	4.30464
		111	-0.05	3.82068		111	0.0603896	1.33737		111	-0.0757143	1.02029		111	-0.02	4.05647
		111.5	-0.0677922	3.75379		111.5	0.0596104	1.33164		111.5	-0.0242857	0.969358		111.5	-0.05	3.85765
		112	-0.0522078	3.72266		112	0.05	1.36588		112	-0.03	0.876646		112	-0.05	3.64269
		112.5	-0.05	3.4968		112.5	0.05	1.44248		112.5	-0.05	0.764133		112.5	-0.05	3.38948
		113	-0.07	3.24811		113	0.0598701	1.6458		113	-0.0449351	0.657945		113	-0.0361688	3.17182
		113.5	-0.05	3.09212		113.5	0.0401299	1.86356		113.5	-0.0250649	0.603594		113.5	-0.0538312	2.81569
		114	-0.08	2.96633		114	0.05	2.2599		114	-0.02	0.565731		114	-0.0657792	2.57549
		114.5	-0.067013	2.70865		114.5	0.0492208	2.79179		114.5	-0.03	0.513009		114.5	-0.0642208	2.45322
		115	-0.0598701	2.31334		115	0.0207792	3.34556		115	-0.02	0.468586		115	-0.05	2.21023
		115.5	-0.0631169	1.95785		115.5	0.02	3.84915		115.5	-0.03	0.44177		115.5	-0.0701948	2.02714
		116	-0.0366234	1.79148		116	0.03	3.97948		116	-0.02	0.411273		116	-0.0798052	1.79708
		116.5	-0.0633766	1.70837		116.5	0.02	4.2743		116.5	-0.03	0.370308		116.5	-0.04	1.57557
		117	-0.0863636	1.62473		117	0.03	4.52485		117	0	0.328897		117	-0.08	1.36118
		117.5	-0.087987	1.58829		117.5	0.02	4.90671		117.5	0.03	0.28602		117.5	-0.07	1.16769
		118	-0.0456494	1.65868		118	0	5.56662		118	-0.03	0.245677		118	-0.0642208	1.05097
		118.5	-0.05	1.67424		118.5	0.03	5.94285		118.5	0	0.201762		118.5	-0.0657792	0.993208
		119	-0.08	1.49759		119	0	6.3014		119	-0.02	0.166333		119	-0.07	0.936646
		119.5	-0.05	1.35325		119.5	0	6.39338		119.5	0	0.143681		119.5	-0.0690909	0.865175
		120	-0.0555844	1.29163		120	0.00805195	6.40612		120	0.02	0.12262		120	-0.0509091	0.778043
		120.5	-0.0444156	1.17747		120.5	-0.00805195	6.30454		120.5	0	0.106477		120.5	-0.05	0.675644
		121	-0.07	1.00279		121	0	6.12377		121	0.03	0.0902189		121	-0.08	0.644941
		121.5	-0.02	0.882049		121.5	-0.03	5.90083		121.5	0	0.0904244		121.5	-0.05	0.636073
		122	-0.0350649	0.860848		122	-0.02	5.64724		122	0.02	0.0863189		122	-0.05	0.601796
		122.5	-0.0449351	0.802599		122.5	-0.0261039	5.40985		122.5	0.03	0.0993397		122.5	-0.02	0.531973
		123	-0.02	0.675769		123	-0.0238961	5.33685		123	0.02	0.11897		123	-0.05	0.485113
		123.5	-0.03	0.582172		123.5	-0.03	5.40623		123.5	0.03	0.12555		123.5	-0.05	0.474446
		124	-0.02	0.482917		124	-0.04	5.42712		124	0.04	0.0782839		124	-0.0318831	0.479763
		124.5	0	0.431065		124.5	-0.0468831	5.28083		124.5	0.03	0.018356		124.5	-0.0181169	0.450093
		125	-0.03	0.405501		125	-0.0331169	4.98654		125	0.0402597	-0.0184335		125	-0.02	0.415377
		125.5	0	0.412451		125.5	-0.02	4.62063		125.5	0.0297403	-0.0218577		125.5	-0.03	0.384547
		126	0.00603896	0.400274		126	-0.05	4.17999		126	0.05	0.00681888		126	-0.02	0.333344
		126.5	0.023961	0.355301		126.5	-0.0663636	3.90093		126.5	0.05	0.0605681		126.5	0	0.363797
		127	0.00376623	0.311818		127	-0.0398701	3.68726		127	0.042987	0.154411		127	0	0.344599
		127.5	0.0462338	0.258686		127.5	-0.0379221	3.53275		127.5	0.0398701	0.321724		127.5	0	0.347881
		128	0.02	0.234736		128	-0.0558442	3.27438		128	0.0471429	0.511733		128	0	0.296368
		128.5	0.03	0.224148		128.5	-0.07	2.97685		128.5	0.07	0.752912		128.5	0	0.295727
		129	0.0248701	0.198786		129	-0.0585714	2.74504		129	0.0387013	0.94738		129	0.0297403	0.29869
		129.5	0.0451299	0.160412		129.5	-0.0648052	2.56153		129.5	0.0348052	1.11695		129.5	0.0366234	0.301842
		130	0.0244805	0.133267		130	-0.0466234	2.36081		130	0.0764935	1.16163		130	0.0336364	0.284685
		130.5	0.0648052	0.116878		130.5	-0.08	2.22501		130.5	0.07	1.26938		130.5	0.02	0.287495
		131	0.0348052	0.0597753		131	-0.0551948	2.08575		131	0.041871	1.33045		131	0.05	0.330278
		131.5	0.0648052	0.0560627		131.5	-0.0448052	2.10119		131.5	0.038129	1.48902		131.5	0.02	0.317309
		132	0.0611039	0.0633508		132	-0.07	2.15758		132	0.0615584	1.55583		132	0.05	0.2361
		132.5	0.0623377	0.114542		132.5	-0.0722078	2.1657		132.5	0.0305844	1.69146		132.5	0.05	0.128752
		133	0.0576623	0.125893		133	-0.0577922	2.07827		133	0.0648052	1.91415		133	0.0581818	0.0615624
		133.5	0.05	0.171884		133.5	-0.02	1.93699		133.5	0.0348052	2.11606		133.5	0.0648052	0.0634686
		134	0.07	0.239352		134	-0.07	1.84867		134	0.0782468	2.38437		134	0.057013	0.0835306
		134.5	0.08	0.318593		134.5	-0.05	1.80715		134.5	0.0213636	2.63721		134.5	0.05	0.103012
		135	0.0516883	0.393519		135	-0.05	1.76968		135	0.0648052	2.86353		135	0.07	0.139277
		135.5	0.0683117	0.46555		135.5	-0.05	1.72262		135.5	0.0348052	2.91697		135.5	0.05	0.194138
		136	0.08	0.533119		136	-0.05	1.67775		136	0.049026	3.10148		136	0.07	0.272649
		136.5	0.07	0.644515		136.5	-0.0437662	1.63685		136.5	0.05	3.42757		136.5	0.08	0.378538
		137	0.0511688	0.794984		137	-0.0362338	1.54217		137	0.0353896	4.01339		137	0.0544156	0.493726
		137.5	0.0688312	0.985184		137.5	-0.04	1.38239		137.5	0.0346104	4.33421		137.5	0.0655844	0.617331
		138	0.05	1.17475		138	-0.03	1.19583		138	0.05	4.48937		138	0.0541558	0.745497
		138.5	0.08	1.31474		138.5	-0.02	1.06985		138.5	0.03	4.69387		138.5	0.0658442	1.06841
		139	0.0506494	1.45885		139	-0.03	1.03649		139	0.02	5.03244		139	0.08	1.25151
		139.5	0.0393506	1.5824		139.5	-0.02	1.03891		139.5	0.02	5.4519		139.5	0.0637662	1.43397
		140	0.05	1.69401		140	-0.03	1.04843		140	0.03	5.73242		140	0.0562338	1.19876
		140.5	0.0653896	1.83596		140.5	0	1.00192		140.5	0.02	6.01274		140.5	0.0702597	1.24136
		141	0.0346104	2.03977		141	-0.02	0.951845		141	0.03	6.28279		141	0.0331169	1.27435
		141.5	0.06	2.24313		141.5	0	0.888528		141.5	0.02	6.60219		141.5	0.0598701	1.46598
		142	0.04	2.38823		142	0.02	0.83291		142	0	6.67999		142	0.0567532	1.69368
		142.5	0.02	2.45321		142.5	-0.02	0.780375		142.5	0.0282468	6.45343		142.5	0.05	1.97847
		143	0.03	2.53975		143	0	0.749937		143	0.00175325	6.25647		143	0.0328571	2.26308
		143.5	0.02	2.68708		143.5	0.02	0.743461		143.5	0	5.88699		143.5	0.0298701	2.43344
		144	0	2.85595		144	0	0.737795		144	0	5.63954		144	0.0372727	2.59617
		144.5	0.03	3.05487		144.5	0.03	0.70677		144.5	-0.0274675	5.45037		144.5	0.0387013	2.64271
		145	0	3.1567		145	0.02	0.717026		145	-0.00253247	5.51962		145	0.0136364	2.55034
		145.5	0.02	3.18483		145.5	0.03	0.751881		145.5	0	5.67263		145.5	0.0176623	2.43712
		146	-0.02	3.26265		146	0.0219481	0.705351		146	0	5.62535		146	0.03	2.34496
		146.5	0	3.417		146.5	0.0480519	0.650336		146.5	-0.02	5.46044		146.5	0	2.36721
		147	-0.03	3.68669		147	0.02	0.618986		147	-0.03	5.11414		147	0	2.454
		147.5	0	3.92134		147.5	0.05	0.615598		147.5	-0.02	4.93051		147.5	0	2.56004
		148	-0.05	4.07512		148	0.0307792	0.620206		148	-0.03	4.85798		148	0	2.81633
		148.5	-0.02	4.1253		148.5	0.0492208	0.568204		148.5	-0.02	4.92357		148.5	-0.03	2.96339
		149	-0.03	4.14396		149	0.0505195	0.52374		149	-0.0307143	5.06335		149	0	3.20628
		149.5	-0.0279221	4.04848		149.5	0.0598701	0.489291		149.5	-0.0392857	5.05792		149.5	-0.02	3.32153
		150	-0.0420779	3.91493		150	0.0398701	0.453022		150	-0.05	4.94752		150	-0.03	3.41283
		150.5	-0.05	3.74697		150.5	0.0598701	0.453863		150.5	-0.03	4.66597		150.5	-0.05	3.21724
		151	-0.0462987	3.62175		151	0.0598701	0.489445		151	-0.05	4.26579		151	-0.0207792	2.95688
		151.5	-0.0537013	3.48923		151.5	0.05	0.551682		151.5	-0.04	3.85446		151.5	-0.0351948	2.58877
		152	-0.04	3.189		152	0.0697403	0.667376		152	-0.05	3.45805		152	-0.064026	2.30569
		152.5	-0.08	2.98607		152.5	0.0398701	0.78838		152.5	-0.03	3.07627		152.5	-0.05	2.0909
		153	-0.05	2.70027		153	0.0603896	0.865793		153	-0.05	2.77605		153	-0.05	2.12526
		153.5	-0.07	2.53769		153.5	0.08	0.930857		153.5	-0.05	2.60884		153.5	-0.04	2.15663
		154	-0.08	2.30302		154	0.05	1.02162		154	-0.0558442	2.48127		154	-0.08	2.12956
		154.5	-0.07	2.18204		154.5	0.0536364	1.15353		154.5	-0.0441558	2.27498		154.5	-0.05	2.00259
		155	-0.0664935	2.09982		155	0.0663636	1.34849		155	-0.05	1.96134		155	-0.0697403	1.88056
		155.5	-0.0535065	2.01611		155.5	0.07	1.55431		155.5	-0.07	1.62439		155.5	-0.0398701	1.82164
		156	-0.0962338	1.92022		156	0.0487013	1.84678		156	-0.05	1.38674		156	-0.0903896	1.78385
		156.5	-0.0537662	1.78644		156.5	0.0512987	2.24184		156.5	-0.05	1.25402		156.5	-0.07	1.6738
		157	-0.03	1.66882		157	0.05	2.5694		157	-0.05	1.19234		157	-0.05	1.45602
		157.5	-0.07	1.54058		157.5	0.0824675	2.71101		157.5	-0.0649351	1.1166		157.5	-0.07	1.18571
		158	-0.07	1.36436		158	0.0357143	2.75323		158	-0.0398701	0.980476		158	-0.0784416	1.01134
		158.5	-0.08	1.28556		158.5	0.0318182	2.85804		158.5	-0.0598701	0.859672		158.5	-0.0603896	0.941188
		159	-0.05	1.21418		159	0.0468831	3.09875		159	-0.0553247	0.730247		159	-0.0598701	0.924983
		159.5	-0.07	1.14066		159.5	0.0231169	3.4761		159.5	-0.0416234	0.672896		159.5	-0.0598701	0.962462
		160	-0.0451948	0.964134		160	0.03	3.89996		160	-0.0348052	0.610098		160	-0.0614286	1.03079
		160.5	-0.0398701	0.751693		160.5	0.02	4.34168		160.5	-0.0435714	0.558726		160.5	-0.0624675	1.08932
		161	-0.0449351	0.661527		161	0.05	4.43243		161	-0.05	0.462714		161	-0.0375325	1.07916
		161.5	-0.04	0.632137		161.5	0.02	4.50062		161.5	-0.05	0.371609		161.5	-0.0620779	1.01669
		162	-0.03	0.657833		162	0.03	4.62931		162	-0.0337662	0.320374		162	-0.0679221	0.952399
		162.5	-0.0268182	0.656756		162.5	0.02	5.01361		162.5	-0.0462338	0.301576		162.5	-0.05	0.890367
		163	-0.0231818	0.630107		163	0.03	5.44897		163	-0.0252597	0.281316		163	-0.02	0.838626
		163.5	-0.05	0.601652		163.5	0	5.75165		163.5	-0.0447403	0.263918		163.5	-0.05	0.721182
		164	0	0.53697		164	0	5.94309		164	-0.02	0.237289		164	-0.02	0.632368
		164.5	-0.02	0.492439		164.5	0.02	5.8416		164.5	-0.03	0.19848		164.5	-0.03	0.562632
		165	0	0.487721		165	-0.02	5.69566		165	-0.02	0.153495		165	-0.02	0.529279
		165.5	0	0.516614		165.5	0	5.21038		165.5	-0.03	0.112383		165.5	-0.03	0.515093
		166	0	0.510031		166	-0.0241558	4.94047		166	-0.02	0.0850372		166	-0.02	0.495693
		166.5	0	0.481844		166.5	-0.00584416	4.76701		166.5	0	0.0603808		166.5	0	0.473554
		167	0.02	0.445492		167	-0.02	4.83989		167	-0.03	0.0330711		167	0	0.46429
		167.5	0.03	0.401247		167.5	-0.03	4.77869		167.5	-0.02	0.012773		167.5	0.00649351	0.423563
		168	0.02	0.307258		168	-0.02	4.5834		168	0	0.0106329		168	0.0135065	0.362165
		168.5	0.03	0.224899		168.5	-0.05	4.49194		168.5	0	0.0532318		168.5	0	0.30934
		169	0.02	0.194921		169	-0.02	4.35392		169	0	0.0957824		169	0.03	0.281964
		169.5	0.05	0.198648		169.5	-0.05	4.2296		169.5	0.02	0.0956454		169.5	0.02	0.259391
		170	0.02	0.193274		170	-0.0450649	3.87987		170	0	0.0277315		170	0.0237662	0.228822
		170.5	0.08	0.159028		170.5	-0.0349351	3.59863		170.5	0	-0.00751703		170.5	0.0262338	0.212095
		171	0.05	0.134681		171	-0.0422078	3.31733		171	0.03	0.00292626		171	0.03	0.202493
		171.5	0.05	0.123375		171.5	-0.0277922	3.04765		171.5	0	0.0504649		171.5	0.04	0.186418
		172	0.05	0.132931		172	-0.05	2.7844		172	0.02	0.0405255		172	0.05	0.151147
		172.5	0.0519481	0.156622		172.5	-0.07	2.59211		172.5	0.03	0.0317072		172.5	0.05	0.111408
		173	0.0680519	0.187386		173	-0.0442857	2.45407		173	0.0213636	0.0227674		173	0.0450649	0.0977511
		173.5	0.05	0.233593		173.5	-0.0557143	2.299		173.5	0.0286364	0.035087		173.5	0.0623377	0.0790168
		174	0.0615584	0.302807		174	-0.05	2.10483		174	0.04	0.0441638		174	0.0648052	0.0801055
		174.5	0.0584416	0.396568		174.5	-0.08	1.90472		174.5	0.03	0.0422859		174.5	0.0577922	0.0822376
		175	0.08	0.504317		175	-0.04	1.76435		175	0.05	0.0173394		175	0.04	0.123563
		175.5	0.07	0.610648		175.5	-0.0554545	1.67281		175.5	0.0353896	-0.0114798		175.5	0.0844156	0.185972
		176	0.0665584	0.717465		176	-0.0445455	1.5775		176	0.0346104	-0.0195738		176	0.0655844	0.291625
		176.5	0.0548052	0.831233		176.5	-0.1	1.39282		176.5	0.05	-0.027808		176.5	0.0562338	0.375858
		177	0.0786364	0.917963		177	-0.0432468	1.2182		177	0.0498701	-0.0255785		177	0.0737662	0.459248
		177.5	0.0506494	0.998169		177.5	-0.0567532	1.17444		177.5	0.0398701	-0.000361672		177.5	0.07	0.497181
		178	0.0693506	1.1162		178	-0.05	1.1641		178	0.0402597	0.064565		178	0.0637662	0.542689
		178.5	0.05	1.21669		178.5	-0.0528571	1.15834		178.5	0.0542208	0.220617		178.5	0.0616883	0.611565
		179	0.08	1.27342		179	-0.0598701	1.05124		179	0.0357792	0.399378		179	0.0745455	0.74535
		179.5	0.0401948	1.34437		179.5	-0.0572727	0.939601		179.5	0.0638312	0.579662		179.5	0.07	0.869598
		180	0.0498052	1.45698		180	-0.05	0.877186		180	0.0361688	0.713755		180	0.05	0.976543
		180.5	0.05	1.61113		180.5	-0.05	0.793185		180.5	0.08	0.778315		180.5	0.0546753	1.04053
		181	0.08	1.79488		181	-0.05	0.72371		181	0.05	0.884707		181	0.0583117	1.14893
		181.5	0.02	1.92502		181.5	-0.0320779	0.636916		181.5	0.05	0.990743		181.5	0.087013	1.35309
		182	0.05	2.1628		182	-0.0479221	0.561986		182	0.05	1.16546		182	0.02	1.50706
		182.5	0.02	2.34854		182.5	-0.04	0.517086		182.5	0.0526623	1.33777		182.5	0.05	1.69171
		183	0.03	2.58433		183	-0.03	0.528709		183	0.0648052	1.48934		183	0.03	1.82372
		183.5	0.02	2.82234		183.5	-0.02	0.558994		183.5	0.0348052	1.67381		183.5	0.04	2.00758
		184	0	3.12456		184	-0.03	0.528102		184	0.0677273	1.84351		184	0.03	2.22717
		184.5	0.03	3.27852		184.5	-0.02	0.46911		184.5	0.0318831	2.09224		184.5	0.0231169	2.45335
		185	0	3.35744		185	-0.03	0.450846		185	0.0648052	2.43644		185	0.0268831	2.60568
		185.5	0	3.30506		185.5	-0.02	0.464982		185.5	0.0348052	2.65306		185.5	0.02	2.72251
		186	0	3.53753		186	0	0.499806		186	0.0385065	2.87076		186	0.03	2.74118
		186.5	0	3.85136		186.5	0	0.491164		186.5	0.05	2.91383		186.5	0	2.59091
		187	-0.03	4.31048		187	0	0.455697		187	0.0459091	3.21602		187	0	2.43634
		187.5	0	4.51883		187.5	0	0.435214		187.5	0.0240909	3.46757		187.5	0	2.25848
		188	0	4.71934		188	0	0.393081		188	0.05	3.76284		188	0	2.48554
		188.5	-0.05	4.83704		188.5	0.02	0.391232		188.5	0.03	4.04339		188.5	-0.03	2.61778
		189	-0.05	5.00392		189	0	0.433622		189	0.02	4.19239		189	0	2.74428
		189.5	-0.0375325	5.07422		189.5	0.03	0.457311		189.5	0.02	4.26652		189.5	-0.0211688	2.68645
		190	-0.0398701	5.01006		190	0.02	0.437989		190	0.0464935	4.2601		190	-0.0288312	2.61053
		190.5	-0.0425974	4.90604		190.5	0.03	0.375541		190.5	0.00350649	4.46211		190.5	-0.0207792	2.49347
		191	-0.0571429	4.80608		191	0.02	0.30593		191	0.03	4.77332		191	-0.0492208	2.35414
		191.5	-0.0428571	4.68106		191.5	0.05	0.304217		191.5	0.02	5.13863		191.5	-0.05	2.19914
		192	-0.0503247	4.41373		192	0.034026	0.304438		192	0	5.33816		192	-0.05	2.1089
		192.5	-0.0696753	4.1512		192.5	0.035974	0.296572		192.5	0.03	5.43342		192.5	-0.02	2.04556
		193	-0.07	3.90507		193	0.05	0.264807		193	0	5.53599		193	-0.08	2.0478
		193.5	-0.05	3.76513		193.5	0.03	0.207129		193.5	0	5.5542		193.5	-0.04	2.05542
		194	-0.0595455	3.67831		194	0.07	0.218574		194	0	5.58398		194	-0.0644156	1.96701
		194.5	-0.0904545	3.42763		194.5	0.0487013	0.208693		194.5	0	5.55878		194.5	-0.0655844	1.73548
		195	-0.0561039	3.13345		195	0.0398701	0.280666		195	-0.03	5.58159		195	-0.07	1.44324
		195.5	-0.0638961	3.03786		195.5	0.0414286	0.307357		195.5	0	5.69981		195.5	-0.05	1.19213
		196	-0.05	2.93842		196	0.07	0.341584		196	0	5.78805		196	-0.08	1.01029
		196.5	-0.08	2.88319		196.5	0.05	0.354952		196.5	-0.02	5.88712		196.5	-0.04	0.892077
		197	-0.07	2.59992		197	0.0580519	0.406917		197	-0.03	6.01724		197	-0.0888312	0.828761
		197.5	-0.0731818	2.39968		197.5	0.0619481	0.493059		197.5	-0.02	5.92418		197.5	-0.0598701	0.825658
		198	-0.0468182	2.3651		198	0.08	0.540146		198	-0.03	5.67454		198	-0.0641558	0.843033
		198.5	-0.08	2.26712		198.5	0.05	0.58534		198.5	-0.0242857	5.31484		198.5	-0.0871429	0.830397
		199	-0.0550649	2.18487		199	0.0575325	0.642952		199	-0.0369481	5.01172		199	-0.05	0.728594
		199.5	-0.0598701	1.91381		199.5	0.0624675	0.768515		199.5	-0.0287662	4.78187		199.5	-0.0681818	0.633095
		200	-0.0550649	1.67985		200	0.05	0.939433		200	-0.0438961	4.40159		200	-0.0518182	0.537505
		200.5	-0.05	1.48698		200.5	0.05	1.09905		200.5	-0.0361039	3.77266		200.5	-0.05	0.478979
		201	-0.03	1.3679		201	0.057013	1.30853		201	-0.0404545	3.29707		201	-0.08	0.455363
		201.5	-0.0344156	1.28323		201.5	0.062987	1.4169		201.5	-0.0295455	2.91764		201.5	-0.05	0.468454
		202	-0.0355844	1.16074		202	0.05	1.51255		202	-0.0633766	2.6872		202	-0.0312987	0.423527
		202.5	-0.05	1.00227		202.5	0.0466234	1.57316		202.5	-0.0398701	2.47979		202.5	-0.0648052	0.397902
		203	-0.02	0.908745		203	0.0533766	1.66467		203	-0.0467532	2.28658		203	-0.0311688	0.320552
		203.5	-0.0208442	0.867777		203.5	0.05	1.91963		203.5	-0.05	2.15704		203.5	-0.0427273	0.301198
		204	-0.00915584	0.809141		204	0.05	2.1348		204	-0.0628571	2.04139		204	-0.02	0.236409
		204.5	-0.02	0.741444		204.5	0.0441558	2.53697		204.5	-0.0398701	1.90522		204.5	-0.03	0.210444
		205	0	0.659739		205	0.0118182	2.9101		205	-0.0598701	1.80064		205	-0.0301299	0.18528
		205.5	0	0.614215		205.5	0.034026	3.23497		205.5	-0.0574026	1.72771		205.5	-0.0198701	0.180642
		206	0	0.575168		206	0.0357143	3.41327		206	-0.05	1.66513		206	-0.02	0.140155
		206.5	0	0.542107		206.5	0.0142857	3.51637		206.5	-0.05	1.61185		206.5	0	0.133369
		207	0	0.529605		207	0.03	3.71007		207	-0.05	1.51561		207	0	0.126959
		207.5	0	0.500865		207.5	0.02	3.92284		207.5	-0.05	1.35568		207.5	0	0.0992405
		208	0	0.480262		208	0.00779221	4.28734		208	-0.0618182	1.16284		208	0	0.0490195
		208.5	0	0.471593		208.5	0.0222078	4.59655		208.5	-0.0398701	0.981126		208.5	0.02	0.0104322
		209	0	0.486066		209	0	4.88064		209	-0.0483117	0.891051		209	0.03	0.0358515
		209.5	0.0120779	0.488851		209.5	0	5.23386		209.5	-0.07	0.875505		209.5	0	0.079578
		210	0.00792208	0.442309		210	0	5.56103		210	-0.0369481	0.855741		210	0.02	0.111334
		210.5	0	0.391993		210.5	0	6.04454		210.5	-0.0348052	0.864189		210.5	0.05	0.129345
		211	-0.02	0.358901		211	-0.03	6.38843		211	-0.0372078	0.812692		211	0.0351948	0.134966
		211.5	0.02	0.378108		211.5	0	6.46533		211.5	-0.041039	0.797062		211.5	0.0148052	0.161122
		212	0	0.394891		212	-0.02	6.31288		212	-0.05	0.689144		212	0.05	0.171493
		212.5	0	0.400521		212.5	-0.021039	6.1099		212.5	-0.05	0.636178		212.5	0.0648052	0.187241
		213	0	0.372815		213	-0.028961	6.15958		213	-0.02	0.544287		213	0.0551948	0.171793
		213.5	0	0.350338		213.5	-0.03	6.15837		213.5	-0.05	0.511841		213.5	0.05	0.118499
		214	0.000779221	0.322273		214	-0.04	5.81894		214	-0.02	0.399267		214	0.08	0.0750406
		214.5	0.0292208	0.322951		214.5	-0.03	5.25691		214.5	-0.03	0.380955		214.5	0.05	0.0296574
		215	-0.0198701	0.313124		215	-0.05	4.71199		215	-0.02	0.360476		215	0.07	0.106756
		215.5	-0.0101299	0.304964		215.5	-0.05	4.43056		215.5	-0.03	0.389212		215.5	0.041039	0.171064
		216	0	0.268043		216	-0.02	4.17947		216	-0.02	0.353731		216	0.078961	0.246518
		216.5	0.03	0.245072		216.5	-0.05	3.8743		216.5	0	0.328277		216.5	0.0706494	0.352064
						217	-0.05	3.56107		217	-0.03	0.283415		217	0.062987	0.406063
						217.5	-0.05	3.31845		217.5	-0.0192208	0.301317		217.5	0.0598701	0.481382
						218	-0.0525974	3.08484		218	-0.000779221	0.297703		218	0.0764935	0.551984
						218.5	-0.0598701	2.89447		218.5	0	0.294095		218.5	0.0698701	0.679343
						219	-0.0575325	2.68203		219	0	0.245703		219	0.0601299	0.828135
						219.5	-0.0683117	2.54745		219.5	0.0187013	0.208926		219.5	0.062987	0.945831
						220	-0.0516883	2.37903		220	0.0012987	0.17833		220	0.057013	1.06616
						220.5	-0.05	2.17273		220.5	0	0.152857		220.5	0.0690909	1.18541
						221	-0.08	1.98532		221	0.03	0.124132		221	0.0509091	1.31322
						221.5	-0.0616883	1.84017		221.5	0	0.101462		221.5	0.0424675	1.39113
						222	-0.0583117	1.71371		222	0.02	0.0980475		222	0.0575325	1.42461
						222.5	-0.05	1.60308		222.5	0.03	0.107381		222.5	0.05	1.53064
						223	-0.08	1.53279		223	0.02	0.127588		223	0.0320779	1.69424
						223.5	-0.0311688	1.38784		223.5	0.03	0.13018		223.5	0.0379221	1.90931
						224	-0.0588312	1.21416		224	0.04	0.116199		224	0.03	2.07099
						224.5	-0.05	1.00653		224.5	0.03	0.123865		224.5	0.0375325	2.28228
						225	-0.05	0.870868		225	0.05	0.142209		225	0.0324675	2.22233
						225.5	-0.05	0.853094		225.5	0.02	0.139878		225.5	0	2.16586
						226	-0.05	0.844328		226	0.05	0.125113		226	0.03	2.05521
						226.5	-0.03	0.904625		226.5	0.03	0.0986105		226.5	0	2.22224
						227	-0.05	0.953121		227	0.07	0.114896		227	0.02	2.43646
						227.5	-0.02	1.01703		227.5	0.0466234	0.137738		227.5	0	2.47203
						228	-0.05	1.05925		228	0.0333766	0.138905		228	-0.02	2.47538
						228.5	-0.02	1.12631		228.5	0.04	0.178664		228.5	0	2.47037
						229	-0.03	1.08864		229	0.0593506	0.206243		229	-0.05	2.58674
						229.5	-0.02	1.01433		229.5	0.0648052	0.374961		229.5	-0.03	2.62134
						230	-0.03	0.817073		230	0.0558442	0.543727		230	-0.02	2.51263
						230.5	-0.02	0.775793		230.5	0.05	0.777159		230.5	-0.0151948	2.38434
						231	0	0.700671		231	0.05	0.963323		231	-0.0348052	2.22097
						231.5	0	0.73222		231.5	0.05	1.1244		231.5	-0.0346104	2.12065
						232	0	0.655197		232	0.05	1.28024		232	-0.0353896	2.06426
						232.5	0	0.584464		232.5	0.04	1.4174		232.5	-0.0642208	1.96099
						233	0	0.53595		233	0.08	1.5663		233	-0.0357792	1.76672
						233.5	0.02	0.439871		233.5	0.0425974	1.82817		233.5	-0.07	1.48015
						234	0.03	0.382981		234	0.0574026	2.09632		234	-0.0786364	1.37339
						234.5	0	0.326827		234.5	0.05	2.39676		234.5	-0.0348052	1.26588
						235	0.02	0.352902		235	0.05	2.64275		235	-0.0665584	1.20627
						235.5	0.03	0.388762		235.5	0.0418182	2.90533		235.5	-0.07	1.03777
						236	0.02	0.389767		236	0.0281818	3.26459		236	-0.0778571	0.993273
						236.5	0.05	0.37288		236.5	0.05	3.59139		236.5	-0.0421429	0.950907
						237	0.0464935	0.358652		237	0.0262338	3.81835		237	-0.08	0.90772
						237.5	0.0235065	0.357405		237.5	0.0437662	3.97363		237.5	-0.07	0.822477
						238	0.03	0.36309		238	0.0338961	4.03504		238	-0.0770779	0.743302
						238.5	0.0572727	0.370518		238.5	0.0461039	4.19804		238.5	-0.0529221	0.626631
						239	0.0598701	0.365068		239	0.02	4.50748		239	-0.07	0.506748
						239.5	0.0398701	0.298572		239.5	0.02	4.74859		239.5	-0.0576623	0.443971
						240	0.042987	0.266183		240	0.03	4.8735		240	-0.0598701	0.434697
						240.5	0.0767532	0.205263		240.5	0.02	4.75518		240.5	-0.0524675	0.441336
						241	0.0432468	0.248843		241	0.03	4.70813		241	-0.05	0.41904
						241.5	0.0564935	0.318866		241.5	0.02	4.84123		241.5	-0.08	0.372624
						242	0.0635065	0.404345		242	0	5.17146		242	-0.05	0.33393
						242.5	0.0593506	0.462668		242.5	0.03	5.34495		242.5	-0.0303247	0.284864
						243	0.0648052	0.489248		243	0	5.4982		243	-0.0396753	0.263983
						243.5	0.0558442	0.541783		243.5	0	5.54539		243.5	-0.05	0.23964
						244	0.05	0.585957		244	0	5.68129		244	-0.02	0.23863
						244.5	0.07	0.636784		244.5	-0.0183117	5.65993		244.5	-0.03	0.234741
						245	0.05	0.720399		245	-0.0116883	5.40364		245	-0.02	0.224655
						245.5	0.0554545	0.932123		245.5	0	5.06		245.5	-0.03	0.240041
						246	0.0645455	1.18678		246	0	4.75141		246	-0.015974	0.153671
						246.5	0.05	1.43766		246.5	-0.02	4.7005		246.5	-0.00402597	0.156713
						247	0.05	1.60319		247	-0.03	4.64899		247	0	0.106077
						247.5	0.05	1.70076		247.5	-0.02	4.55476		247.5	0	0.112221
						248	0.05	1.82961		248	-0.03	4.49288		248	0	0.124855
						248.5	0.05	1.90452		248.5	-0.02	4.33127		248.5	0.02	0.166866
						249	0.0418182	1.96093		249	-0.0215584	4.1228		249	0.03	0.242241
						249.5	0.0281818	2.0479		249.5	-0.0484416	3.76068		249.5	0.02	0.197818
						250	0.0442857	2.20179		250	-0.05	3.25093		250	0.0224026	0.138993
						250.5	0.0257143	2.45957		250.5	-0.03	2.99316		250.5	0.0275974	0.0724391
						251	0.03	2.68835		251	-0.05	2.80247		251	0.0446753	0.053567
						251.5	0.02	2.93637		251.5	-0.02	2.62794		251.5	0.0321429	0.0692943
						252	0.03	3.21083		252	-0.05	2.39317		252	0.0431818	0.0625687
						252.5	0.02	3.52615		252.5	-0.0601299	2.13479		252.5	0.05	0.0619088
						253	0	3.76012		253	-0.0398701	1.93083		253	0.05	0.0788831
						253.5	0.03	3.8461		253.5	-0.05	1.75692		253.5	0.056039	0.10053
						254	0	3.94126		254	-0.0697403	1.59754		254	0.0648052	0.139551
						254.5	0	4.12379		254.5	-0.0398701	1.4327		254.5	0.0591558	0.137625
						255	0	4.48139		255	-0.0598701	1.26816		255	0.0604545	0.168513
						255.5	0	4.97207		255.5	-0.0345455	1.1524		255.5	0.0630519	0.157074
						256	0	5.25688		256	-0.065974	1.10745		256	0.0664935	0.162947
						256.5	-0.03	5.40614		256.5	-0.0590909	1.10484		256.5	0.05	0.138741
						257	-0.0124675	5.3292		257	-0.0409091	1.09027		257	0.0931169	0.142414
						257.5	-0.0375325	5.30577		257.5	-0.05	1.03145		257.5	0.0613636	0.1553
						258	-0.02	5.21137		258	-0.0687013	0.944337		258	0.0583766	0.177555
						258.5	-0.03	4.91036		258.5	-0.0512987	0.928671		258.5	0.0571429	0.230518
						259	-0.0319481	4.49709		259	-0.03	0.858158		259	0.08	0.391492
						259.5	-0.0380519	4.21965		259.5	-0.04	0.803423		259.5	0.07	0.568455
						260	-0.05	4.15304		260	-0.0772727	0.684786		260	0.0423377	0.711022
						260.5	-0.05	4.14582		260.5	-0.0348052	0.611217		260.5	0.0576623	0.824181
						261	-0.0371429	4.01214		261	-0.0379221	0.550715		261	0.07	0.881262
						261.5	-0.0328571	3.63573		261.5	-0.05	0.504496		261.5	0.05	0.990693
						262	-0.07	3.21682		262	-0.0476623	0.479655		262	0.0418182	1.09457
						262.5	-0.05	2.79815		262.5	-0.0323377	0.440654		262.5	0.0581818	1.23142
						263	-0.05	2.58628		263	-0.02	0.392532		263	0.0415584	1.35467
						263.5	-0.0511688	2.52605		263.5	-0.05	0.363228		263.5	0.0284416	1.45844
						264	-0.0894805	2.44817		264	-0.02	0.349392		264	0.03	1.56909
						264.5	-0.0398701	2.27394		264.5	-0.03	0.331456		264.5	0.05	1.71566
						265	-0.0394805	1.96514		265	-0.02	0.294162		265	0.02	1.81636
						265.5	-0.08	1.76062		265.5	-0.03	0.253918		265.5	0	1.86791
						266	-0.05	1.56606		266	-0.02	0.241263		266	0.03	1.95459
						266.5	-0.05	1.46873		266.5	-0.0364935	0.254689		266.5	0	2.03363
						267	-0.05	1.37724		267	-0.0135065	0.285148		267	-0.03	2.17456
						267.5	-0.07	1.38229		267.5	0	0.289956		267.5	0.03	2.18192
						268	-0.0644156	1.32412		268	0.02	0.285265		268	0	2.22761
						268.5	-0.0355844	1.20925		268.5	0	0.270001		268.5	-0.03	2.28419
						269	-0.0593506	1.04094		269	0	0.25351		269	0	2.38406
						269.5	-0.0606494	0.901641		269.5	0	0.232577		269.5	-0.02	2.41283
						270	-0.05	0.803055		270	0	0.177776		270	-0.03	2.32005
						270.5	-0.048961	0.725936		270.5	0	0.148413		270.5	-0.05	2.30437
						271	-0.0398701	0.661329		271	0.03	0.114414		271	-0.02	2.3276
						271.5	-0.0598701	0.59582		271.5	0.02	0.118761		271.5	-0.05	2.2746
						272	-0.0312987	0.509548		272	0	0.0943026		272	-0.05	2.14249
						272.5	-0.02	0.412887		272.5	0.03	0.078229		272.5	-0.05	1.88497
						273	-0.02	0.364459		273	0.02	0.0493583		273	-0.05	1.72041
						273.5	-0.05	0.373907		273.5	0.0346753	0.0400687		273.5	-0.04	1.48634
						274	-0.03	0.388292		274	0.0353247	0.0519667		274	-0.05	1.29479
						274.5	-0.02	0.389634		274.5	0.03	0.0486718		274.5	-0.08	1.16233
						275	0	0.357431		275	0.02	0.0568271		275	-0.07	1.03004
						275.5	-0.03	0.350652		275.5	0.0562338	0.0510336		275.5	-0.0483117	0.876218
						276	-0.02	0.339181		276	0.0437662	0.0627774		276	-0.0816883	0.734011
						276.5	0	0.384068		276.5	0.05	0.0837204		276.5	-0.0670779	0.630033
						277	0	0.395665		277	0.05	0.117802		277	-0.0608442	0.572192
						277.5	0	0.417558		277.5	0.05	0.197102		277.5	-0.0420779	0.533944
						278	0	0.370367		278	0.0435065	0.306658		278	-0.1	0.484246
						278.5	0.02	0.333403		278.5	0.0564935	0.475423		278.5	-0.05	0.465527
						279	0.03	0.266622		279	0.05	0.653293		279	-0.0574026	0.46275
						279.5	0	0.238759		279.5	0.0246753	0.817206		279.5	-0.0625974	0.446902
						280	0.02	0.233716		280	0.0648052	0.98148		280	-0.07	0.438976
						280.5	0.03	0.238695		280.5	0.0605195	1.11376		280.5	-0.05	0.422741
						281	0.02	0.220804		281	0.05	1.26455		281	-0.0603247	0.432263
						281.5	0.0461039	0.217759		281.5	0.0525974	1.37934		281.5	-0.0396753	0.480356
						282	0.0238961	0.237855		282	0.0598701	1.4899		282	-0.08	0.432826
						282.5	0.03	0.283717		282.5	0.031039	1.53968		282.5	-0.0447403	0.410424
						283	0.0557143	0.317868		283	0.0764935	1.61385		283	-0.0252597	0.378047
						283.5	0.0442857	0.298388		283.5	0.05	1.70032		283.5	-0.05	0.398826
						284	0.0554545	0.243536		284	0.05	1.89312		284	-0.02	0.380945
						284.5	0.0598701	0.190594		284.5	0.0227273	2.07959		284.5	-0.03	0.321144
						285	0.0546753	0.167618		285	0.0772727	2.24749		285	-0.05	0.235583
						285.5	0.05	0.169845		285.5	0.05	2.54331		285.5	-0.02	0.167137
						286	0.05	0.16062		286	0.02	2.90757		286	0	0.161067
						286.5	0.05	0.169865		286.5	0.05	3.27312		286.5	0	0.162358
						287	0.07	0.217915		287	0.05	3.61398		287	0	0.152372
						287.5	0.05	0.318451		287.5	0.0215584	3.89101		287.5	0	0.177111
						288	0.0566234	0.321972		288	0.0393506	4.18912		288	0	0.191565
						288.5	0.0733766	0.307231		288.5	0.0390909	4.43379		288.5	0.02	0.185339
						289	0.0541558	0.258713		289	0.02	4.66241		289	0.03	0.156041
						289.5	0.0658442	0.320673		289.5	0.0207792	5.01533		289.5	0.02	0.114522
						290	0.05	0.488834		290	0.0292208	5.42581		290	0.03	0.136765
						290.5	0.07	0.615789		290.5	0.02	5.88065		290.5	0.02	0.075538
						291	0.05	0.859822		291	0.03	6.02031		291	0.0342857	0.061949
						291.5	0.05	1.06275		291.5	0.02	5.77067		291.5	0.0357143	0.0806312
						292	0.05	1.39369		292	0	5.3974		292	0.05	0.133147
						292.5	0.05	1.72326		292.5	0.03	5.00313		292.5	0.05	0.189554
						293	0.05	2.0575		293	-0.03	5.17969		293	0.05	0.177293
						293.5	0.05	2.34558		293.5	0	5.31573		293.5	0.05	0.190687
						294	0.05	2.47373		294	0.03	5.49602		294	0.08	0.171166
						294.5	0.02	2.48754		294.5	0	5.47782		294.5	0.05	0.187622
						295	0.05	2.43585		295	-0.03	5.30834		295	0.0448701	0.197294
						295.5	0.02	2.39995		295.5	0	5.02892		295.5	0.0751299	0.224723
						296	0.03	2.38994		296	-0.00883117	4.69633		296	0.07	0.26841
						296.5	0.02	2.34605		296.5	-0.0111688	4.46084		296.5	0.0692857	0.314066
						297	0.03	2.34676		297	-0.03	4.43139		297	0.0607143	0.383708
						297.5	0.02	2.45487		297.5	-0.02	4.40211		297.5	0.07	0.448396
						298	0.00272727	2.69132		298	-0.03	4.33804		298	0.07	0.520599
						298.5	0.0272727	2.98209		298.5	-0.02	4.1821		298.5	0.0685065	0.647356
						299	0	3.23203		299	-0.0320779	3.94563		299	0.0614935	0.74294
						299.5	-0.03	3.36149		299.5	-0.0379221	3.68731		299.5	0.0620779	0.783585
						300	0	3.59589		300	-0.03	3.47269		300	0.0608442	0.803787
						300.5	0	3.93623		300.5	-0.05	3.31162		300.5	0.0648052	0.865503
						301	0.03	4.31858		301	-0.05	3.13225		301	0.033961	1.03493
						301.5	-0.03	4.76236		301.5	-0.0374026	2.92319		301.5	0.0683117	1.19673
						302	-0.02	4.97372		302	-0.0325974	2.74954		302	0.05	1.29798
						302.5	-0.03	5.09989		302.5	-0.0671429	2.6093		302.5	0.05	1.38406
						303	-0.02	5.04812		303	-0.0398701	2.41773		303	0.03	1.49482
						303.5	-0.03	5.04232		303.5	-0.042987	2.13247		303.5	0.04	1.67736
						304	-0.0202597	5.13583		304	-0.0567532	1.85168		304	0.0309091	1.90809
						304.5	-0.0598701	5.06498		304.5	-0.0632468	1.61928		304.5	0.0190909	2.05297
						305	-0.0398701	4.77449		305	-0.05	1.44565		305	0.03	2.10533
						305.5	-0.0348052	4.32607		305.5	-0.0445455	1.25323		305.5	0.02	2.04301
						306	-0.0351948	3.94885		306	-0.0554545	1.19549		306	0.03	2.15527
						306.5	-0.05	3.83753		306.5	-0.05	1.18903		306.5	0	2.32865
						307	-0.05	3.61781		307	-0.05	1.16876		307	0.02	2.42662
						307.5	-0.0593506	3.40637		307.5	-0.05	1.0927		307.5	-0.02	2.52289
						308	-0.0606494	3.1547		308	-0.05	1.04069		308	0	2.49085
						308.5	-0.05	2.96713		308.5	-0.0655844	0.97832		308.5	-0.0144156	2.57262
						309	-0.05	2.7524		309	-0.0398701	0.924251		309	-0.0155844	2.55849
						309.5	-0.0632468	2.50899		309.5	-0.0575325	0.831858		309.5	-0.02	2.54959
						310	-0.0567532	2.33586		310	-0.0348052	0.766664		310	-0.03	2.49501
						310.5	-0.0628571	2.18716		310.5	-0.0872727	0.703803		310.5	-0.0336364	2.36212
						311	-0.0855844	2.07418		311	-0.0349351	0.640746		311	-0.0363636	2.29838
						311.5	-0.0398701	1.90776		311.5	-0.02	0.592839		311.5	-0.05	2.20968
						312	-0.0616883	1.75789		312	-0.03	0.557235		312	-0.0480519	2.07373
						312.5	-0.05	1.63037		312.5	-0.05	0.507067		312.5	-0.0348052	1.88211
						313	-0.05	1.48717		313	-0.0266234	0.460107		313	-0.0671429	1.70674
						313.5	-0.0577922	1.34249		313.5	-0.0433766	0.427366		313.5	-0.0524675	1.51334
						314	-0.0622078	1.21052		314	-0.02	0.40649		314	-0.0648052	1.29118
						314.5	-0.05	1.1169		314.5	-0.03	0.411609		314.5	-0.0527273	1.1104
						315	-0.0474026	1.06304		315	-0.02	0.398722		315	-0.07	0.980738
						315.5	-0.0398701	0.956489		315.5	-0.03	0.38564		315.5	-0.05	0.91043
						316	-0.0627273	0.782551		316	-0.02	0.396295		316	-0.0764935	0.858578
						316.5	-0.037013	0.62618		316.5	0	0.419003		316.5	-0.0435065	0.844456
						317	-0.042987	0.563793		317	-0.03	0.454425		317	-0.0974026	0.822774
						317.5	-0.02	0.540521		317.5	0	0.41969		317.5	-0.0825974	0.74212
						318	-0.05	0.490413		318	0	0.415721		318	-0.0671429	0.626623
						318.5	-0.02	0.464599		318.5	-0.02	0.42374		318.5	-0.0528571	0.533612
						319	-0.0245455	0.415647		319	0	0.460271		319	-0.05	0.472764
						319.5	-0.0254545	0.457843		319.5	0.02	0.465481		319.5	-0.07	0.488741
						320	-0.03	0.458185		320	0	0.443635		320	-0.0466234	0.482971
						320.5	0	0.413735		320.5	0	0.418131		320.5	-0.0533766	0.419379
						321	-0.02	0.373993		321	0.03	0.414122		321	-0.0745455	0.323654
						321.5	0	0.327679		321.5	0	0.422051		321.5	-0.0554545	0.245217
						322	0	0.37454		322	0.0231169	0.429667		322	-0.02	0.146122
						322.5	0	0.31577		322.5	0.0268831	0.429523		322.5	-0.08	0.114288
						323	0	0.285523		323	0.0227273	0.403803		323	-0.02	0.0972446
						323.5	0.02	0.28577		323.5	0.0272727	0.348838		323.5	-0.05	0.178442
						324	0.03	0.323849		324	0.04	0.259221		324	-0.02	0.236836
						324.5	0	0.347011		324.5	0.0171429	0.178264		324.5	-0.03	0.2993
						325	0	0.303716		325	0.0328571	0.158263		325	-0.02	0.289219
						325.5	0.05	0.228037		325.5	0.05	0.133962		325.5	-0.03	0.247275
						326	0.02	0.146652		326	0.0515584	0.153264		326	-0.0150649	0.219001
						326.5	0.05	0.0816434		326.5	0.0484416	0.145898		326.5	-0.00493506	0.227128
						327	0.02	0.0568323		327	0.05	0.192687		327	0	0.223175
						327.5	0.05	0.0522298		327.5	0.03	0.222447		327.5	0	0.212108
						328	0.05	0.0536822		328	0.07	0.292687		328	0	0.184716
						328.5	0.05	0.0509365		328.5	0.0355844	0.330545		328.5	0	0.156401
						329	0.03	0.0429191		329	0.0348052	0.388853		329	0	0.148572
						329.5	0.07	0.0550006		329.5	0.0796104	0.436993		329.5	0	0.150257
						330	0.0435065	0.0811212		330	0.05	0.534488		330	0	0.142495
						330.5	0.0398701	0.117551		330.5	0.05	0.829193		330.5	0	0.0998384
						331	0.0666234	0.147323		331	0.05	1.15433		331	0.02	0.0908753
						331.5	0.0531169	0.180562		331.5	0.05	1.43587		331.5	0	0.10338
						332	0.0668831	0.234222		332	0.05	1.46286		332	0	0.0593088
						332.5	0.0328571	0.291559		332.5	0.054026	1.37443		332.5	0	0.00449917
						333	0.0471429	0.360741		333	0.035974	1.31996		333	0	-0.0370078
						333.5	0.1	0.435877		333.5	0.0636364	1.40146		333.5	0	-0.00109227
						334	0.05	0.48976		334	0.0663636	1.55193		334	0	0.00647629
						334.5	0.0435065	0.538991		334.5	0.05	1.74638		334.5	0	0.0238537
						335	0.0764935	0.584053		335	0.05	1.96559		335	0	0.0538654
						335.5	0.07	0.722668		335.5	0.05	2.17139		335.5	0	0.0932481
						336	0.05	0.93444		336	0.02	2.31556		336	0.03	0.120801
						336.5	0.0527273	1.21994		336.5	0.05	2.34852		336.5	-0.03	0.123834
						337	0.0472727	1.45829		337	0.0227273	2.40857		337	0	0.132289
						337.5	0.0515584	1.636		337.5	0.0353247	2.71942		337.5	0.03	0.119943
						338	0.0484416	1.85263		338	0.0419481	3.1931		338	0	0.121664
						338.5	0.0219481	2.0239		338.5	0.05	3.50391		338.5	0	0.0980312
						339	0.0780519	2.32312		339	0.02	3.66492		339	-0.03	0.0753806
						339.5	0.02	2.58965		339.5	0.0312987	3.86586		339.5	0	0.0576956
						340	0.0409091	2.91643		340	0.0187013	4.21402		340	0.03	0.0696642
						340.5	0.0290909	3.12518		340.5	0.02	4.56228		340.5	0	0.117149
						341	0.03	3.28305		341	0.03	4.83366		341	0	0.137289
						341.5	0.02	3.41775		341.5	0.02	5.00073		341.5	-0.03	0.122611
						342	0.03	3.50962		342	0	5.17329		342	0.03	0.107575
						342.5	0.02	3.69646		342.5	0.03	5.17864		342.5	0	0.118893
						343	0.03	3.94784		343	0	5.18265		343	0	0.129141
						343.5	0	4.19764		343.5	0	5.32767		343.5	0	0.084865
						344	0	4.32336		344	0	5.44143		344	-0.03	0.0181152
						344.5	0	4.22779		344.5	0	5.28544		344.5	0.03	-0.0208959
						345	0	4.08354		345	-0.03	4.80318		345	0	-0.0321916
						345.5	-0.03	3.94903		345.5	0	4.47908		345.5	0	-0.0416548
						346	0	3.88379		346	0	4.29121		346	0	-0.0648508
						346.5	0	4.00356		346.5	-0.05	4.09584		346.5	0	-0.0492343
						347	-0.02	4.03717		347	-0.02	3.88025		347	-0.03	0.00139016
						347.5	-0.03	3.97997		347.5	-0.03	3.9705
						348	-0.02	3.61324		348	0	4.23092
						348.5	-0.03	3.45006		348.5	-0.02	4.43077
						349	-0.02	3.41077		349	-0.05	4.38623
						349.5	-0.05	3.22968		349.5	-0.02	4.17985
						350	-0.0324675	3.07904		350	-0.03	3.92974
						350.5	-0.0375325	2.98774		350.5	-0.05	3.63871
						351	-0.0620779	3.0983		351	-0.05	3.26583
						351.5	-0.0379221	3.18621		351.5	-0.04	3.04853
						352	-0.05	3.21194		352	-0.03	2.77705
						352.5	-0.05	3.1644		352.5	-0.05	2.67591
						353	-0.07	3.06133		353	-0.05	2.47174
						353.5	-0.05	2.8704		353.5	-0.0538961	2.38205
						354	-0.08	2.62245		354	-0.0598701	2.24959
						354.5	-0.05	2.35929		354.5	-0.0362338	2.0989
						355	-0.0505195	2.10844		355	-0.0635065	1.93203
						355.5	-0.0648052	1.90085		355.5	-0.0315584	1.74159
						356	-0.0546753	1.71412		356	-0.0881818	1.58004
						356.5	-0.07	1.5229		356.5	-0.0567532	1.46895
						357	-0.05	1.31075		357	-0.042987	1.39695
						357.5	-0.05	1.1244		357.5	-0.0398701	1.32732
						358	-0.05	0.993862		358	-0.0471429	1.24905
						358.5	-0.0661039	0.921055		358.5	-0.05	1.19721
						359	-0.0538961	0.845684		359	-0.0624675	1.12382
						359.5	-0.05	0.764077		359.5	-0.031039	1.04328
						360	-0.05	0.667713		360	-0.0464935	0.99349
						360.5	-0.05	0.63921		360.5	-0.05	0.944792
						361	-0.05	0.605088		361	-0.05	0.868844
						361.5	-0.0453247	0.59957		361.5	-0.05	0.717356
						362	-0.0346753	0.576301		362	-0.03	0.59966
						362.5	-0.0350649	0.52946		362.5	-0.05	0.527422
						363	-0.0349351	0.458177		363	-0.0369481	0.492598
						363.5	-0.0422078	0.403722		363.5	-0.0330519	0.467965
						364	-0.00779221	0.383648		364	-0.02	0.464842
						364.5	-0.02	0.364041		364.5	-0.03	0.48354
						365	-0.03	0.337115		365	-0.02	0.508698
						365.5	0	0.315693		365.5	-0.03	0.527664
						366	-0.02	0.295008		366	-0.02	0.520542
						366.5	0	0.288965		366.5	-0.000584416	0.478202
						367	0	0.259435		367	-0.0294156	0.45487
						367.5	0	0.270177		367.5	0	0.449523
						368	0.02	0.223187		368	-0.02	0.419861
						368.5	0	0.199958		368.5	0	0.336364
						369	0.03	0.16964		369	0	0.249403
						369.5	0	0.172626		369.5	0	0.183151
						370	0.02	0.183053		370	0.02	0.17694
						370.5	0.03	0.191803		370.5	0	0.168503
						371	0.0242857	0.195534		371	0	0.199294
						371.5	0.0384416	0.184521		371.5	0	0.19279
						372	0.0272727	0.171595		372	0	0.183246
						372.5	0.05	0.172822		372.5	0	0.184068
						373	0.05	0.168513		373	0	0.217188
						373.5	0.03	0.146309		373.5	0	0.244793
						374	0.07	0.12413		374	0	0.236713
						374.5	0.0419481	0.0990376		374.5	0	0.246491
						375	0.0398701	0.0843494		375	0.03	0.23855
						375.5	0.0598701	0.097718		375.5	0	0.247061
						376	0.0583117	0.146372		376	-0.03	0.256378
						376.5	0.0614286	0.214528		376.5	0	0.270082
						377	0.0585714	0.275154		377	0.0114935	0.294267
						377.5	0.05	0.319196		377.5	-0.00779221	0.281714
						378	0.08	0.378278		378	-0.0037013	0.292526
						378.5	0.05	0.441557		378.5	0	0.390907
						379	0.0211688	0.558954		379	0	0.500816
						379.5	0.0688312	0.696956		379.5	0.03	0.575532
						380	0.0805195	0.860518		380	0	0.53605
						380.5	0.0694805	0.94855		380.5	0	0.418596
						381	0.05	0.970327
						381.5	0.05	0.998275
						382	0.05	1.09497
						382.5	0.05	1.34966
						383	0.05	1.54844
						383.5	0.05	1.78363
						384	0.0492208	1.85432
						384.5	0.0207792	1.99273
						385	0.03	2.05909
						385.5	0.04	2.15405
						386	0.03	2.24041
						386.5	0.02	2.37486
						387	0.03	2.53301
						387.5	0.02	2.6093
						388	0	2.67898
						388.5	0.03	2.75992
						389	0	2.85653
						389.5	0	2.90459
						390	0	2.87938
						390.5	0	2.90954
						391	-0.03	3.04189
						391.5	0	3.24855
						392	-0.05	3.55606
						392.5	0	3.89833
						393	-0.02	4.14512
						393.5	-0.03	4.25047
						394	-0.02	4.3186
						394.5	-0.05	4.37564
						395	-0.05	4.34999
						395.5	-0.0297403	4.1415
						396	-0.0402597	3.94281
						396.5	-0.05	3.77183
						397	-0.05	3.46936
						397.5	-0.07	3.23614
						398	-0.0458442	3.04994
						398.5	-0.0541558	2.91415
						399	-0.05	2.75901
						399.5	-0.08	2.51839
						400	-0.0353247	2.23403
						400.5	-0.0624675	1.98233
						401	-0.0722078	1.86387
						401.5	-0.0549351	1.8625
						402	-0.0598701	1.81127
						402.5	-0.0551948	1.67858
						403	-0.05	1.47872
						403.5	-0.07	1.25247
						404	-0.0442857	1.05681
						404.5	-0.0398701	0.935054
						405	-0.0658442	0.905043
						405.5	-0.05	0.890577
						406	-0.0437662	0.841581
						406.5	-0.0398701	0.77775
						407	-0.0463636	0.700456
						407.5	-0.0233766	0.682441
						408	-0.0364935	0.685571
						408.5	-0.0301299	0.653176
						409	-0.03	0.594391
						409.5	-0.02	0.514814
						410	0	0.486557
						410.5	-0.05	0.397295
						411	0	0.355502
						411.5	0	0.324396
						412	0	0.345961
						412.5	0	0.351152
						413	0	0.3617
						413.5	0	0.360297
						414	0.02	0.35948
						414.5	0.03	0.330364
						415	0.02	0.315909
						415.5	0.03	0.267094
						416	0.02	0.209465
						416.5	0.03	0.183573
						417	0.04	0.181015
						417.5	0.05	0.200223
						418	0.0406494	0.212768
						418.5	0.0593506	0.201248
						419	-0.0597403	0.171443
						419.5	-0.11026	0.123819
						420	-0.164805	0.0896374
						420.5	-0.324545	0.0721578
						421	-0.13987	0.0590269
						421.5	-0.0607792	0.0453256
						422	-0.08	0.035678
						422.5	-0.02	0.0257808
						423	-0.0387013	-0.00582501
						423.5	-0.0112987	-0.0242753
						424	0	-0.0208198
						424.5	-0.03	0.0203707
						425	0	0.0497633
						425.5	-0.02	0.048299
						426	0	0.0485103
						426.5	0	0.0561028
						427	0	0.0761424
						427.5	0	0.0603714
						428	0	0.0523308
						428.5	0.02	0.0423621
						429	0	0.0458326
						429.5	0	0.0529695
						430	0	0.0629386
						430.5	0.03	0.100005
						431	0	0.117073
						431.5	-0.03	0.151627
						432	0	0.146367
						432.5	0.03	0.169741
						433	0	0.185862
						433.5	0	0.234282
						434	-0.03	0.223236
						434.5	0.03	0.204608
						435	0	0.141564
						435.5	0	0.151291
						436	0	0.0793636
						436.5	0	0.0952444
						437	0.02	0.0857564
						437.5	0	0.121731
						438	0	0.135847
						438.5	0	0.162109
						439	-0.00441558	0.186938
						439.5	-0.0155844	0.212702
						440	0.02	0.242574
						440.5	0	0.297228

## Sheet: Fig 2E
Time (s)	Temperature change (Celsius/s)	Locomotion state (forward = 1, Reverse = -1)	Calcium activity of AIY (dR/R0)	AVA	RME	SMDD	SMDV	RIM
0.4744	-0.161605	-1	1.17223	0.93323	0.858974	0.369464	0.403592	0.133028
0.9744	-0.143803	-1	1.04811	0.954871	0.851839	0.378483	0.50674	0.133998
1.4744	-0.134113	-1	0.924827	0.97597	0.84693	0.38798	0.609003	0.13503
1.9744	-0.121441	-1	0.817434	0.986738	0.884507	0.406605	0.694373	0.137246
2.4744	-0.105825	-1	0.718124	0.99692	0.926129	0.427701	0.777368	0.13915
2.9744	-0.0813517	-1	0.662815	1.00391	0.989772	0.462248	0.847436	0.139357
3.4744	-0.0529271	-1	0.614737	1.01164	1.04602	0.491336	0.909018	0.140054
3.9744	-0.0295519	-1	0.588872	1.02163	1.07956	0.503658	0.944534	0.142254
4.4744	-0.00671138	-1	0.563006	1.03162	1.11309	0.51598	0.98005	0.144453
4.9744	0.0168491	-1	0.544976	1.04917	1.15103	0.530743	1.02439	0.144871
5.4744	0.0385503	-1	0.54284	1.08203	1.19791	0.550458	1.08662	0.141675
5.9744	0.0587251	-1	0.555413	1.12675	1.24768	0.564178	1.15458	0.139755
6.4744	0.0766623	-1	0.587545	1.18723	1.30132	0.569926	1.23014	0.139532
6.9744	0.091655	-1	0.626681	1.25787	1.41052	0.586045	1.29844	0.140581
7.4744	0.10412	-1	0.673796	1.34007	1.58303	0.61398	1.35846	0.143078
7.9744	0.112914	-1	0.742073	1.40356	1.89468	0.637572	1.42838	0.145978
8.4744	0.116638	-1	0.824766	1.4543	2.30111	0.658206	1.50504	0.149152
8.9744	0.115545	1	0.881827	1.46032	2.73063	0.670484	1.58098	0.15049
9.4744	0.108252	1	0.928549	1.44831	3.16945	0.679392	1.65663	0.151086
9.9744	0.0951105	1	0.97759	1.40611	3.67627	0.680205	1.75016	0.150546
10.4744	0.0769164	1	1.02721	1.35641	4.19999	0.679005	1.84814	0.149724
10.9744	0.0558003	1	1.08157	1.34209	4.44856	0.67809	1.9112	0.145784
11.4744	0.0314298	1	1.13976	1.33082	4.66773	0.678327	1.96946	0.141633
11.9744	0.00676941	1	1.26217	1.3243	4.74424	0.699568	1.98949	0.138138
12.4744	-0.0180883	1	1.37747	1.31742	4.80621	0.719079	2.00845	0.134627
12.9744	-0.0412976	1	1.44676	1.30821	4.77423	0.727409	2.02045	0.131012
13.4744	-0.0616047	1	1.49871	1.28957	4.75735	0.734452	2.03724	0.128072
13.9744	-0.0783981	1	1.50273	1.24489	4.78223	0.737937	2.06727	0.127
14.4744	-0.0935682	1	1.48258	1.21176	4.89312	0.735767	2.10126	0.127776
14.9744	-0.105571	1	1.4241	1.19699	5.14052	0.724626	2.14153	0.131484
15.4744	-0.113863	1	1.36025	1.19573	5.40216	0.724761	2.18513	0.137353
15.9744	-0.11758	1	1.29137	1.20716	5.67718	0.735473	2.23186	0.145249
16.4744	-0.116176	1	1.22115	1.22688	5.95252	0.751118	2.29378	0.159051
16.9744	-0.107985	1	1.15022	1.25113	6.22805	0.769462	2.36401	0.176083
17.4744	-0.0956825	1	1.08004	1.27911	6.42107	0.78816	2.44568	0.184735
17.9744	-0.077536	1	1.01015	1.30851	6.58236	0.806995	2.53176	0.190163
18.4744	-0.0553461	1	0.996802	1.32028	6.61213	0.8096	2.60482	0.183631
18.9744	-0.0317197	1	0.99332	1.32898	6.61895	0.809371	2.67561	0.175011
19.4744	-0.00583332	1	0.993963	1.36226	6.57091	0.811675	2.73498	0.161398
19.9744	0.018937	1	0.993467	1.39432	6.51623	0.814675	2.79288	0.148141
20.4744	0.0405178	1	0.982323	1.41115	6.41434	0.823233	2.84019	0.138927
20.9744	0.0614221	1	0.964201	1.4258	6.31701	0.833871	2.88961	0.131039
21.4744	0.0790548	1	0.921598	1.43281	6.23567	0.851811	2.94641	0.127805
21.9744	0.0932809	1	0.891798	1.43473	6.09272	0.865791	2.99676	0.125395
22.4744	0.105853	1	0.891112	1.42509	5.80966	0.870764	3.03247	0.12486
22.9744	0.114188	1	0.892184	1.40396	5.49173	0.880781	3.06695	0.125752
23.4744	0.117732	1	0.895485	1.36829	5.12961	0.897188	3.09988	0.128454
23.9744	0.116509	1	0.899189	1.3385	4.80844	0.904845	3.12548	0.134066
24.4744	0.1087	1	0.903197	1.31311	4.51794	0.905951	3.14559	0.141858
24.9744	0.0948139	1	0.891702	1.29115	4.66649	0.900429	3.14579	0.147128
25.4744	0.0778935	1	0.872127	1.27098	5.04384	0.891453	3.13561	0.151083
25.9744	0.0555513	1	0.915585	1.28741	5.48114	0.860972	3.11242	0.156019
26.4744	0.0313781	1	0.977743	1.31469	5.93622	0.824111	3.08537	0.161245
26.9744	0.00715991	1	1.07351	1.34124	6.32141	0.791386	3.08014	0.167516
27.4744	-0.0174105	1	1.17323	1.3677	6.69836	0.759149	3.07749	0.173909
27.9744	-0.0403457	1	1.27869	1.38067	6.57462	0.737578	3.08935	0.186781
28.4744	-0.0598412	1	1.37639	1.39211	6.44635	0.718061	3.10383	0.200036
28.9744	-0.0783902	1	1.39497	1.39091	6.37202	0.717035	3.14169	0.215847
29.4744	-0.0928162	1	1.40277	1.39186	6.30075	0.720894	3.17663	0.231174
29.9744	-0.105039	1	1.37254	1.40037	6.24032	0.741973	3.20129	0.244791
30.4744	-0.113706	1	1.32761	1.38363	6.20672	0.772137	3.24107	0.255899
30.9744	-0.11776	1	1.24972	1.3102	6.23336	0.822693	3.31481	0.261378
31.4744	-0.115742	1	1.14494	1.255	6.24472	0.842102	3.31479	0.268938
31.9744	-0.107905	1	1.00602	1.22294	6.23668	0.821964	3.22113	0.279141
32.4744	-0.0954084	1	0.872931	1.17775	6.18434	0.8067	3.09968	0.265361
32.9744	-0.0773691	1	0.744187	1.12277	6.099	0.795066	2.95752	0.233708
33.4744	-0.0566674	1	0.639966	1.26548	6.03348	0.768763	2.73132	0.247741
33.9744	-0.0327167	1	0.546908	1.49817	5.97697	0.735783	2.46687	0.282568
34.4744	-0.00692958	1	0.496122	1.80919	5.91671	0.733196	2.28707	0.43342
34.9744	0.0172039	1	0.455059	2.13823	5.85558	0.7376	2.12676	0.610958
35.4744	0.0396042	1	0.41694	2.55558	5.81691	0.692876	1.96072	0.981948
35.9744	0.0607958	1	0.378505	2.97456	5.77669	0.642631	1.79686	1.37993
36.4744	0.0781385	1	0.313901	3.06694	5.57226	0.583299	1.74885	2.03091
36.9744	0.0938303	1	0.25458	3.17641	5.32688	0.534835	1.70557	2.69111
37.4744	0.106078	1	0.223798	3.37824	4.86029	0.545083	1.68778	3.40113
37.9744	0.113993	1	0.197195	3.57907	4.40307	0.559334	1.66809	4.11512
38.4744	0.117253	1	0.183813	3.77672	3.97551	0.58625	1.64236	4.84163
38.9744	0.116266	1	0.177011	4.04985	3.55174	0.621784	1.60644	5.53572
39.4744	0.107878	1	0.18894	4.5378	3.13873	0.681844	1.54152	6.13754
39.9744	0.0955077	-1	0.191026	4.95796	2.81489	0.731019	1.47982	6.70019
40.4744	0.0782178	-1	0.17641	5.26307	2.64235	0.761723	1.42355	7.19639
40.9744	0.0560876	-1	0.155363	5.50593	2.48887	0.794321	1.38787	7.59628
41.4744	0.032064	-1	0.128072	5.68836	2.3539	0.828758	1.37215	7.90266
41.9744	0.00777829	-1	0.112455	5.75452	2.23007	0.841924	1.34358	8.14484
42.4744	-0.0179307	-1	0.104757	5.7418	2.1138	0.840661	1.30629	8.34347
42.9744	-0.0397816	-1	0.0994835	5.68927	2.0345	0.827828	1.27205	8.45992
43.4744	-0.0606382	-1	0.0951199	5.62179	1.96908	0.810651	1.23897	8.54551
43.9744	-0.07906	-1	0.0908832	5.47587	1.87494	0.795386	1.20364	8.59048
44.4744	-0.0937429	-1	0.0866686	5.31627	1.77578	0.780455	1.1679	8.62838
44.9744	-0.105831	-1	0.0733485	5.1922	1.69401	0.771346	1.14875	8.62118
45.4744	-0.114123	-1	0.0608498	5.07271	1.61103	0.763731	1.1314	8.611
45.9744	-0.117408	-1	0.0580748	4.98413	1.51263	0.767786	1.1255	8.58637
46.4744	-0.115959	-1	0.0617615	4.90855	1.41535	0.773861	1.11902	8.55734
46.9744	-0.108385	-1	0.0931395	4.88863	1.32286	0.788588	1.11	8.50942
47.4744	-0.0949384	-1	0.13304	4.85412	1.2411	0.802092	1.09324	8.47371
47.9744	-0.0768542	-1	0.190984	4.78869	1.18203	0.813005	1.06009	8.46387
48.4744	-0.0560253	-1	0.282128	4.74844	1.12327	0.818743	1.01892	8.50311
48.9744	-0.0318548	-1	0.413395	4.73862	1.06489	0.818228	0.968079	8.60166
49.4744	-0.0067098	-1	0.496756	4.87276	1.0168	0.807396	0.92308	8.71044
49.9744	0.0172913	-1	0.545991	5.10944	0.976044	0.789217	0.882246	8.8265
50.4744	0.0403933	-1	0.5807	5.38233	0.91994	0.772553	0.851853	8.88568
50.9744	0.0609229	-1	0.606004	5.67867	0.853899	0.75687	0.82822	8.90805
51.4744	0.0782882	-1	0.602916	5.91338	0.805022	0.732232	0.807752	8.85328
51.9744	0.0939429	-1	0.589582	6.12586	0.76234	0.704361	0.788425	8.77067
52.4744	0.105971	-1	0.629338	6.16778	0.732688	0.691731	0.764589	8.68338
52.9744	0.113886	-1	0.680231	6.17392	0.705769	0.682298	0.739807	8.5951
53.4744	0.117388	-1	0.722528	6.16357	0.682536	0.672983	0.711966	8.51898
53.9744	0.115677	-1	0.761304	6.14988	0.659529	0.66454	0.684021	8.44425
54.4744	0.107423	-1	0.753222	6.09784	0.637268	0.669153	0.656738	8.38189
54.9744	0.095031	-1	0.73756	6.0529	0.613516	0.674856	0.629154	8.32233
55.4744	0.0776737	-1	0.67954	6.04768	0.581431	0.686642	0.599896	8.27846
55.9744	0.055219	-1	0.624851	6.05632	0.55982	0.702244	0.572244	8.24749
56.4744	0.0319898	-1	0.579649	6.10447	0.568054	0.728717	0.549172	8.25325
56.9744	0.00722215	-1	0.539744	6.12548	0.571816	0.750346	0.524216	8.22047
57.4744	-0.0178527	-1	0.507978	6.10479	0.568707	0.764532	0.496366	8.12847
57.9744	-0.0392891	-1	0.492892	6.03207	0.63433	0.837392	0.476304	7.97647
58.4744	-0.0602133	-1	0.495718	5.90347	0.77376	0.973255	0.464604	7.76005
58.9744	-0.0784603	-1	0.514546	5.7497	0.93334	1.18347	0.445769	7.51222
59.4744	-0.092599	-1	0.543857	5.57945	1.10612	1.44238	0.422259	7.24383
59.9744	-0.105284	-1	0.624731	5.54383	1.19757	1.85385	0.411803	7.05615
60.4744	-0.113644	-1	0.725262	5.55955	1.25801	2.32347	0.406323	6.89924
60.9744	-0.116841	-1	0.891727	5.61602	1.41287	2.78914	0.393768	6.73296
61.4744	-0.115987	-1	1.07346	5.68193	1.5896	3.25389	0.379575	6.56452
61.9744	-0.109069	-1	1.2471	5.73738	1.75908	3.57366	0.372445	6.38314
62.4744	-0.0949688	-1	1.4223	5.78808	1.93298	3.87944	0.365138	6.19736
62.9744	-0.0776538	-1	1.65863	5.72441	2.24864	4.08826	0.338023	5.9126
63.4744	-0.0568025	-1	1.90253	5.65362	2.54305	4.2906	0.310743	5.63318
63.9744	-0.0319276	1	2.21169	5.5215	2.65426	4.43712	0.282051	5.39977
64.4744	-0.00746444	1	2.52489	5.39103	2.76819	4.64024	0.253606	5.16661
64.9744	0.0174806	1	2.85121	5.26596	2.89093	5.02723	0.22596	4.93424
65.4744	0.0409574	1	3.17506	5.12787	3.00603	5.41206	0.224255	4.71083
65.9744	0.0602636	1	3.49454	4.96667	3.10759	5.79303	0.268548	4.50335
66.4744	0.0781783	1	3.77578	4.83033	3.21921	6.15717	0.312235	4.30623
66.9744	0.0938555	1	4.00974	4.72473	3.34325	6.50049	0.355172	4.12194
67.4744	0.105202	1	4.21242	4.60152	3.43401	6.71849	0.392443	3.94871
67.9744	0.113604	1	4.39267	4.4657	3.50092	6.84672	0.425656	3.78342
68.4744	0.117036	1	4.49357	4.33432	3.57642	6.87245	0.418391	3.61877
68.9744	0.115283	1	4.5624	4.20474	3.65538	6.85676	0.394769	3.45438
69.4744	0.107855	1	4.8273	4.0797	3.62241	6.8366	0.378627	3.29157
69.9744	0.0955752	1	5.12937	3.95554	3.56822	6.81559	0.363904	3.12905
70.4744	0.0777982	1	5.2904	3.83181	3.56566	6.72123	0.35621	2.98517
70.9744	0.0564622	1	5.44395	3.70907	3.56649	6.62526	0.348165	2.84253
71.4744	0.0325062	1	5.55138	3.60456	3.59617	6.54787	0.32891	2.71054
71.9744	0.00767103	1	5.59959	3.50167	3.64495	6.45738	0.309742	2.57789
72.4744	-0.0168821	1	5.32829	3.40745	3.79677	6.29616	0.291044	2.44168
72.9744	-0.0392944	1	5.08123	3.31944	3.93372	6.14965	0.273175	2.30681
73.4744	-0.0603311	1	4.89759	3.24764	4.03178	6.04159	0.25747	2.17545
73.9744	-0.0781134	1	4.68914	3.18456	4.09562	5.91337	0.247344	2.06075
74.4744	-0.0928215	1	4.43665	3.13699	4.0987	5.74939	0.247119	1.97561
74.9744	-0.10478	1	4.08067	3.06128	4.03324	5.60727	0.258592	1.90114
75.4744	-0.11421	1	3.61602	2.95604	3.8958	5.48811	0.282347	1.83788
75.9744	-0.117532	1	3.14469	2.89289	3.89786	5.30703	0.334366	1.83084
76.4744	-0.115742	1	2.6691	2.85646	3.98851	5.08663	0.404334	1.85951
76.9744	-0.108717	1	2.19572	2.8653	4.03886	4.85296	0.495558	1.97822
77.4744	-0.0956229	1	1.72331	2.89368	4.0718	4.61356	0.59596	2.13581
77.9744	-0.0785925	1	1.49716	3.02704	4.12087	4.34449	0.680592	2.39376
78.4744	-0.0574989	1	1.31997	3.18125	4.17314	4.06953	0.762091	2.67165
78.9744	-0.0323142	1	1.20161	3.25798	3.93553	3.86317	0.818772	3.00829
79.4744	-0.0073069	1	1.08821	3.32742	3.69062	3.66337	0.871872	3.34421
79.9744	0.017004	1	1.0031	3.35173	3.48284	3.50464	0.897647	3.64994
80.4744	0.0404807	1	0.918527	3.40142	3.28165	3.36317	0.923275	3.9529
80.9744	0.0601312	1	0.835879	3.54367	3.1045	3.28463	0.948367	4.24573
81.4744	0.0780207	1	0.755543	3.70208	2.94132	3.21583	0.966049	4.52692
81.9744	0.0936079	-1	0.680557	3.89786	2.81042	3.16953	0.966587	4.78115
82.4744	0.104864	-1	0.610328	4.0946	2.69238	3.12592	0.967646	5.03362
82.9744	0.112717	-1	0.546374	4.2926	2.5913	3.08585	0.969393	5.28373
83.4744	0.116571	-1	0.490378	4.4083	2.49182	3.01504	0.967706	5.53255
83.9744	0.114928	-1	0.440978	4.45578	2.39367	2.91875	0.963175	5.78029
84.4744	0.108123	-1	0.399461	4.48786	2.28753	2.79615	0.958946	5.99648
84.9744	0.0957778	-1	0.362547	4.51095	2.17672	2.65819	0.954893	6.19426
85.4744	0.0776737	-1	0.332375	4.53034	2.09347	2.55493	0.913152	6.28828
85.9744	0.0560703	-1	0.304373	4.54854	2.01909	2.46283	0.859287	6.34893
86.4744	0.0325816	-1	0.272758	4.77829	1.98579	2.49625	0.823999	6.34141
86.9744	0.00732677	-1	0.241405	5.0318	1.95701	2.5454	0.79161	6.32394
87.4744	-0.0170238	-1	0.247249	5.14719	1.89688	2.59741	0.789499	6.23098
87.9744	-0.0395738	-1	0.257657	5.25917	1.84061	2.64258	0.79401	6.13745
88.4744	-0.0605429	-1	0.296764	5.3497	1.80868	2.64479	0.840173	6.04038
88.9744	-0.0779307	-1	0.333799	5.3787	1.76774	2.62511	0.881958	5.94609
89.4744	-0.0923938	-1	0.363612	5.19309	1.69535	2.52906	0.908478	5.86148
89.9744	-0.104994	-1	0.384981	5.03546	1.64078	2.4439	0.9275	5.79865
90.4744	-0.11392	-1	0.390265	4.93111	1.62019	2.37948	0.932241	5.77732
90.9744	-0.1176	-1	0.383257	4.81461	1.57618	2.32419	0.941247	5.77777
91.4744	-0.116199	-1	0.36231	4.68431	1.50561	2.27925	0.955092	5.80294
91.9744	-0.10788	-1	0.374537	4.54705	1.44981	2.23429	0.968572	5.81775
92.4744	-0.0948113	-1	0.414039	4.40406	1.40616	2.1893	0.98175	5.82405
92.9744	-0.0778935	-1	0.438749	4.49142	1.38264	2.17113	0.974428	5.8545
93.4744	-0.0558307	-1	0.456323	4.68989	1.36884	2.1659	0.957216	5.8966
93.9744	-0.0313305	-1	0.48905	4.99703	1.39037	2.12878	0.904196	5.96446
94.4744	-0.00688985	-1	0.525367	5.32992	1.42028	2.08409	0.842689	6.03843
94.9744	0.0182498	-1	0.485645	5.67373	1.31905	2.00849	0.763154	6.10822
95.4744	0.0404979	-1	0.441924	6.00245	1.20705	1.92883	0.68314	6.17584
95.9744	0.0607455	-1	0.429913	6.07233	1.08694	1.82245	0.61829	6.21343
96.4744	0.0794321	-1	0.416147	6.13353	0.961789	1.71585	0.557551	6.2552
96.9744	0.0942924	-1	0.392617	6.14644	0.808641	1.60798	0.519678	6.32029
97.4744	0.106166	-1	0.382891	6.15089	0.700077	1.50824	0.491484	6.37369
97.9744	0.114807	-1	0.40909	6.13333	0.707533	1.42965	0.488476	6.3967
98.4744	0.117475	-1	0.432743	6.11279	0.710634	1.3477	0.486779	6.41422
98.9744	0.115857	-1	0.452614	6.08782	0.707262	1.26075	0.48703	6.42359
99.4744	0.10799	-1	0.466843	5.99887	0.709681	1.18788	0.491228	6.40871
99.9744	0.0943743	-1	0.475109	5.84232	0.718221	1.12991	0.499599	6.36822
100.474	0.0766847	-1	0.474619	5.74943	0.693457	1.09527	0.502714	6.33721
100.974	0.0560253	-1	0.468078	5.70054	0.645684	1.07674	0.502199	6.31274
101.474	0.0317647	-1	0.446184	5.65658	0.632153	1.06208	0.508782	6.30007
101.974	0.00714673	-1	0.418012	5.61463	0.632621	1.049	0.518269	6.29224
102.474	-0.0168371	-1	0.398693	5.62035	0.621324	1.03802	0.524107	6.24761
102.974	-0.0392971	-1	0.381761	5.63892	0.606855	1.02761	0.528962	6.19306
103.474	-0.0595923	-1	0.397131	5.68023	0.601215	1.03683	0.546125	6.1328
103.974	-0.0773521	-1	0.416278	5.7241	0.59575	1.04868	0.565112	6.07062
104.474	-0.0932186	-1	0.462063	5.7811	0.549137	1.09539	0.616047	5.93307
104.974	-0.105332	-1	0.50862	5.83975	0.500781	1.14448	0.670625	5.80147
105.474	-0.113973	-1	0.562331	5.9138	0.436277	1.21561	0.758972	5.72502
105.974	-0.117712	-1	0.607342	5.98004	0.382902	1.27605	0.847248	5.65769
106.474	-0.116514	-1	0.612014	6.0101	0.381133	1.28695	0.935193	5.63258
106.974	-0.108477	-1	0.610306	6.02109	0.374959	1.28492	1.01563	5.62208
107.474	-0.0958876	-1	0.594359	5.9895	0.358955	1.25399	1.07931	5.64417
107.974	-0.078378	-1	0.573047	5.94748	0.350564	1.21548	1.13129	5.65624
108.474	-0.0564476	-1	0.544941	5.89223	0.351815	1.16736	1.16846	5.65562
108.974	-0.0327564	-1	0.521933	5.82579	0.340209	1.13657	1.19614	5.65318
109.474	-0.0084058	-1	0.502985	5.75043	0.318359	1.1196	1.21627	5.64929
109.974	0.0170516	-1	0.482546	5.82375	0.318242	1.16252	1.22002	5.64908
110.474	0.0392547	-1	0.461373	5.97017	0.328809	1.23489	1.21573	5.65067
110.974	0.0601113	-1	0.454301	6.12268	0.409699	1.30573	1.21396	5.65718
111.474	0.078643	-1	0.451632	6.27709	0.512553	1.3761	1.21299	5.66522
111.974	0.0936357	-1	0.479849	6.37833	0.54976	1.4121	1.21648	5.64379
112.474	0.106298	-1	0.511773	6.47307	0.579117	1.44397	1.22055	5.61884
112.974	0.115092	1	0.562351	6.39956	0.608652	1.44482	1.28005	5.61013
113.474	0.11798	1	0.614342	6.3242	0.627005	1.44392	1.33738	5.59985
113.974	0.116534	1	0.682027	6.22831	0.521156	1.42349	1.37053	5.57228
114.474	0.109134	1	0.737797	6.11416	0.422099	1.40261	1.40157	5.54458
114.974	0.0947861	1	0.750473	5.934	0.347608	1.38009	1.42495	5.51639
115.474	0.0769892	1	0.767111	5.76197	0.274837	1.34594	1.44101	5.47128
115.974	0.0560902	1	0.791691	5.60626	0.205515	1.28845	1.44238	5.39223
116.474	0.0307559	1	0.817407	5.58208	0.204888	1.2393	1.4378	5.32544
116.974	0.00587042	1	0.844744	5.74563	0.302301	1.20203	1.42474	5.27615
117.474	-0.0189396	1	0.945283	5.95391	0.46316	1.15993	1.41325	5.22927
117.974	-0.0428983	1	1.11184	6.20255	0.681238	1.11347	1.40319	5.18456
118.474	-0.0627235	1	1.26023	6.33126	0.884446	1.0354	1.38937	5.13391
118.974	-0.0807058	1	1.39935	6.39881	1.08007	0.941211	1.37363	5.08023
119.474	-0.0962678	1	1.45141	6.22677	1.13627	0.869784	1.35496	5.03399
119.974	-0.107352	1	1.47446	5.97488	1.14601	0.805945	1.33532	4.99022
120.474	-0.115419	1	1.38209	5.70309	1.06105	0.765174	1.3253	4.92943
120.974	-0.118679	1	1.27339	5.4285	0.962694	0.727669	1.31663	4.86622
121.474	-0.115757	1	1.14447	5.32702	0.860063	0.740129	1.2954	4.88631
121.974	-0.107633	1	1.01814	5.23184	0.763162	0.751284	1.27683	4.9066
122.474	-0.0949556	1	0.932767	5.20273	0.751005	0.735742	1.2993	4.9173
122.974	-0.0764397	1	0.843103	5.18834	0.743299	0.720769	1.31923	4.92516
123.474	-0.054422	1	0.735523	5.23533	0.754159	0.708171	1.32858	4.92118
123.974	-0.0309756	1	0.662993	5.32144	0.737792	0.69772	1.33875	4.89572
124.474	-0.00521899	1	0.664872	5.49061	0.663622	0.691828	1.35066	4.82465
124.974	0.0196585	1	0.676614	5.68303	0.586098	0.693715	1.33669	4.75562
125.474	0.0419066	1	0.703247	5.91057	0.50351	0.707348	1.28367	4.68967
125.974	0.0626984	1	0.777686	6.12435	0.438667	0.762574	1.21643	4.63646
126.474	0.0798942	1	0.919347	6.3188	0.398776	0.876285	1.1292	4.60116
126.974	0.0943374	1	1.09671	6.40398	0.406627	1.04485	1.04593	4.61102
127.474	0.10676	1	1.30337	6.39946	0.453666	1.25845	0.965903	4.65795
127.974	0.11496	1	1.65373	6.30264	0.582702	1.52038	0.908564	4.66739
128.474	0.117602	1	2.07254	6.16186	0.750789	1.80533	0.862028	4.65897
128.974	0.116134	1	2.84544	6.01	0.891684	2.06428	0.835084	4.59231
129.474	0.108779	1	3.70379	5.85547	1.02602	2.31695	0.812868	4.51159
129.974	0.0949887	1	4.27838	5.7345	1.21098	2.53678	0.772	4.35347
130.474	0.0783979	1	4.82219	5.61709	1.40067	2.7529	0.72919	4.18725
130.974	0.0568898	1	5.01666	5.52557	1.49956	2.89925	0.679616	3.98798
131.474	0.0315502	1	5.12403	5.43255	1.60397	3.03738	0.630053	3.79113
131.974	0.00704475	1	4.6535	5.32958	1.74504	3.12096	0.580555	3.61035
132.474	-0.0174634	1	4.20456	5.2156	1.88089	3.18061	0.530187	3.43213
132.974	-0.0404754	1	3.81817	5.06971	2.00164	3.17094	0.477297	3.2613
133.474	-0.0597366	1	3.47813	4.92188	2.14184	3.1818	0.430798	3.09378
133.974	-0.078308	1	3.22703	4.77033	2.31934	3.23207	0.396563	2.9326
134.474	-0.0933259	1	3.01958	4.61663	2.48063	3.27282	0.363948	2.78358
134.974	-0.10458	1	2.86461	4.46034	2.62243	3.30212	0.33328	2.64917
135.474	-0.113201	1	2.70139	4.33591	2.78016	3.3528	0.307478	2.51457
135.974	-0.117073	1	2.53222	4.23452	2.94941	3.41893	0.285194	2.37983
136.474	-0.115105	1	2.32633	4.12814	3.09229	3.46154	0.2676	2.27445
136.974	-0.108148	1	2.10237	4.0193	3.22221	3.49258	0.252312	2.18353
137.474	-0.095738	1	1.8968	3.92048	3.31629	3.54258	0.233564	2.08749
137.974	-0.0775042	1	1.69624	3.82439	3.40062	3.59775	0.213874	1.99007
138.474	-0.0564979	1	1.58018	3.72312	3.46976	3.67151	0.201137	1.89852
138.974	-0.032105	1	1.47191	3.62138	3.5375	3.74699	0.189041	1.8075
139.474	-0.00687789	1	1.42207	3.51869	3.57221	3.82818	0.172011	1.70714
139.974	0.0173456	1	1.37728	3.41835	3.61234	3.91238	0.15603	1.60883
140.474	0.0403179	1	1.3721	3.33742	3.6986	4.02125	0.148912	1.52786
140.974	0.0613545	1	1.38414	3.26052	3.76884	4.13719	0.143063	1.45196
141.474	0.0786576	1	1.45518	3.19747	3.78422	4.2773	0.14156	1.3934
141.974	0.0939575	1	1.53342	3.13857	3.79251	4.40895	0.13976	1.33763
142.474	0.105569	1	1.62754	3.08883	3.78515	4.52191	0.137304	1.28801
142.974	0.113993	1	1.74952	3.0571	3.80835	4.60001	0.133131	1.23765
143.474	0.117145	1	1.90587	3.04758	3.86928	4.63507	0.126839	1.1864
143.974	0.115435	1	2.16794	3.02352	3.96032	4.67581	0.117276	1.13438
144.474	0.107229	1	2.51456	2.98785	4.07544	4.72108	0.105098	1.08177
144.974	0.0942419	1	2.85633	2.94391	4.19333	4.78315	0.0981431	1.02911
145.474	0.076298	1	3.19541	2.89539	4.31275	4.85455	0.0940909	0.976425
145.974	0.0547423	1	3.41492	2.82823	4.39058	4.96981	0.0896998	0.931704
146.474	0.0306565	1	3.59979	2.75567	4.45636	5.09778	0.0852105	0.889288
146.974	0.00636554	1	3.54004	2.68188	4.49878	5.14463	0.079166	0.850132
147.474	-0.0188192	1	3.4516	2.60863	4.53917	5.18046	0.0728457	0.811352
147.974	-0.0411798	1	3.38813	2.57079	4.61819	5.14715	0.0619117	0.771917
148.474	-0.0613069	1	3.34014	2.53053	4.683	5.1098	0.0518925	0.730763
148.974	-0.0790746	1	3.37909	2.4767	4.66797	5.04969	0.0470089	0.679962
149.474	-0.09407	1	3.39289	2.42584	4.64757	4.98706	0.0427655	0.629976
149.974	-0.106096	1	3.32193	2.38505	4.60905	4.91598	0.0406798	0.58274
150.474	-0.11445	1	3.21566	2.33747	4.5529	4.86947	0.0386864	0.540493
150.974	-0.117557	1	3.04156	2.27686	4.46289	4.87018	0.0368702	0.50783
151.474	-0.11554	1	2.81126	2.22059	4.3999	4.8912	0.0356497	0.480716
151.974	-0.108145	1	2.5084	2.16992	4.37179	4.93844	0.0351986	0.460769
152.474	-0.0950562	1	2.27157	2.05636	4.282	4.97406	0.0339114	0.444767
152.974	-0.0772341	1	2.08977	1.89038	4.14082	4.99999	0.0319272	0.432052
153.474	-0.0558731	1	1.93239	1.73345	3.9856	5.0168	0.0326047	0.418687
153.974	-0.0317647	1	1.78636	1.58073	3.82386	5.02937	0.0345198	0.40502
154.474	-0.00673231	1	1.71723	1.4337	3.61778	5.03341	0.0373227	0.387896
154.974	0.0170013	1	1.66533	1.28794	3.40175	5.03554	0.0403246	0.369996
155.474	0.0401034	1	1.59174	1.27643	3.21525	5.12284	0.0444659	0.353895
155.974	0.0609904	1	1.51951	1.27809	3.03291	5.21597	0.048506	0.33791
156.474	0.0786178	1	1.53304	1.26392	2.87681	5.23897	0.0473542	0.320264
156.974	0.0939151	1	1.56028	1.24652	2.73237	5.25613	0.0456782	0.303935
157.474	0.106268	1	1.661	1.21184	2.65039	5.24197	0.0411906	0.294662
157.974	0.114935	1	1.79758	1.16956	2.57098	5.19813	0.0380187	0.283886
158.474	0.119051	1	2.02385	1.10826	2.49801	5.08005	0.0381378	0.269349
158.974	0.117498	1	2.60991	1.04661	2.43713	4.95973	0.0411071	0.256407
159.474	0.109568	1	3.73971	0.984452	2.39451	4.83601	0.048384	0.245875
159.974	0.0956202	1	4.81217	0.923942	2.34125	4.70406	0.0637985	0.239116
160.474	0.0784575	1	5.82107	0.865265	2.27621	4.56297	0.088236	0.23654
160.974	0.0565523	1	6.64103	0.868922	2.42469	4.41713	0.124922	0.21613
161.474	0.0324863	1	7.33356	0.914624	2.71719	4.26808	0.16987	0.183692
161.974	0.00754655	1	7.20134	0.936474	3.12831	3.94776	0.227912	0.151188
162.474	-0.0179731	1	6.76064	0.949404	3.58379	3.5634	0.290851	0.118659
162.974	-0.0402834	1	6.27941	0.982236	4.07974	3.17713	0.359709	0.0810412
163.474	-0.0597141	1	5.78878	1.01968	4.58507	2.79042	0.42994	0.0422433
163.974	-0.0787675	1	5.33882	0.983512	4.87754	2.4683	0.492145	0.0515571
164.474	-0.0942673	1	4.89732	0.945817	5.14872	2.16844	0.553531	0.0643473
164.974	-0.106687	1	4.52984	0.949272	5.32455	2.09805	0.611127	0.0817337
165.474	-0.115199	1	4.16121	0.959781	5.49826	2.03769	0.670149	0.0976824
165.974	-0.118808	1	3.78648	1.00749	5.66079	2.03017	0.736693	0.106049
166.474	-0.116881	1	3.42915	1.05489	5.80667	2.03145	0.802785	0.112581
166.974	-0.109788	1	3.11335	1.10154	5.91286	2.05369	0.867801	0.114736
167.474	-0.096212	1	2.82448	1.14652	5.94945	2.09219	0.927613	0.117135
167.974	-0.0776035	1	2.57327	1.18914	5.88875	2.1534	0.98015	0.119877
168.474	-0.0566847	1	2.3387	1.21578	5.82808	2.19562	1.01868	0.133884
168.974	-0.0318971	1	2.11791	1.22917	5.76744	2.22209	1.0456	0.15723
169.474	-0.00624774	1	1.97621	1.23407	5.68426	2.21247	1.06405	0.176371
169.974	0.0177282	1	1.8715	1.23499	5.59055	2.18598	1.07854	0.193548
170.474	0.0414419	1	1.7967	1.2357	5.49008	2.16766	1.09162	0.201429
170.974	0.0621039	1	1.72898	1.23635	5.38801	2.15128	1.10436	0.207111
171.474	0.0792745	1	1.72634	1.2143	5.30636	2.11476	1.13401	0.20136
171.974	0.0948842	1	1.73057	1.18954	5.22738	2.07558	1.1655	0.194319
172.474	0.10647	1	1.75173	1.1439	5.1783	2.00524	1.20375	0.180243
172.974	0.11456	1	1.77598	1.10043	5.1427	1.93274	1.24303	0.16734
173.474	0.118129	1	1.81792	1.06937	5.18436	1.84776	1.28826	0.161158
173.974	0.116464	1	1.87296	1.04215	5.18247	1.77687	1.33337	0.154757
174.474	0.108168	1	1.96479	1.0257	5.05844	1.74551	1.37813	0.147742
174.974	0.0959499	1	2.04939	1.01277	4.93681	1.71716	1.42426	0.136607
175.474	0.0782178	1	2.12074	1.00631	4.81961	1.69431	1.47291	0.117904
175.974	0.0564622	1	2.17609	0.996789	4.73809	1.67984	1.52723	0.0992257
176.474	0.0326637	1	2.21335	0.983818	4.69687	1.67484	1.58796	0.0805746
176.974	0.00741152	1	2.19639	0.967374	4.73903	1.63931	1.6406	0.0638129
177.474	-0.0174462	1	2.14055	0.948441	4.84096	1.5819	1.68743	0.048406
177.974	-0.0385106	1	2.07098	0.937723	4.96788	1.53417	1.74362	0.0452054
178.474	-0.0593672	1	1.99452	0.931128	5.10733	1.49131	1.8045	0.0481318
178.974	-0.0772396	1	1.91795	0.935591	5.19975	1.44358	1.86859	0.0474755
179.474	-0.0920098	1	1.84137	0.942818	5.28042	1.39464	1.93349	0.0459236
179.974	-0.104475	1	1.76837	0.965921	5.27439	1.35271	1.99183	0.049613
180.474	-0.113356	1	1.69563	0.990179	5.26206	1.31129	2.04969	0.0536835
180.974	-0.117343	1	1.62734	1.00464	5.2977	1.30041	2.09044	0.0585471
181.474	-0.117281	1	1.55804	1.00819	5.32861	1.28834	2.12897	0.0634273
181.974	-0.110822	1	1.47803	0.904858	5.30481	1.2595	2.14818	0.0683449
182.474	-0.0974208	1	1.40451	0.801301	5.29844	1.23328	2.1689	0.072525
182.974	-0.0805653	1	1.3554	0.6969	5.35761	1.21689	2.19534	0.0739307
183.474	-0.0587924	1	1.31119	0.59666	5.37425	1.19417	2.22427	0.0743341
183.974	-0.0337401	1	1.27789	0.505679	5.29626	1.15736	2.25875	0.0725069
184.474	-0.00951666	1	1.25452	0.469029	5.22567	1.13299	2.29149	0.0720517
184.974	0.0156482	1	1.24395	0.502434	5.16463	1.12464	2.32198	0.0733657
185.474	0.0395168	1	1.26486	0.529174	5.12664	1.10648	2.35726	0.0733588
185.974	0.0594546	1	1.31118	0.550535	5.10724	1.08042	2.39641	0.0722859
186.474	0.0777612	1	1.35123	0.574658	5.16932	1.05088	2.44129	0.0699024
186.974	0.0929115	1	1.38772	0.600351	5.27771	1.01935	2.48944	0.066774
187.474	0.105002	1	1.42138	0.620284	5.40363	0.980757	2.52765	0.0625039
187.974	0.114413	1	1.45419	0.638468	5.53488	0.940013	2.56284	0.057887
188.474	0.118417	1	1.44226	0.633134	5.63728	0.904265	2.57646	0.0519573
188.974	0.116489	1	1.42488	0.624934	5.73617	0.869125	2.58746	0.0458677
189.474	0.109309	1	1.4404	0.618991	5.82789	0.841741	2.58776	0.0465483
189.974	0.0967668	1	1.46257	0.610205	5.91757	0.815599	2.5926	0.0472487
190.474	0.0784826	1	1.53257	0.577228	5.99195	0.798029	2.63763	0.0465606
190.974	0.0567323	1	1.59647	0.554587	6.10385	0.783544	2.68867	0.0478916
191.474	0.032534	1	1.64024	0.566047	6.33955	0.779236	2.75952	0.0558838
191.974	0.00688721	1	1.68165	0.563007	6.57825	0.775596	2.85024	0.0633188
192.474	-0.0172913	1	1.71898	0.534739	6.82218	0.773117	2.97553	0.0697845
192.974	-0.0397764	1	1.69539	0.508153	7.04128	0.77571	3.08725	0.0783669
193.474	-0.0603086	1	1.60912	0.483297	7.23484	0.783521	3.18498	0.0891281
193.974	-0.0777361	1	1.53812	0.447958	7.30894	0.785377	3.26641	0.0969853
194.474	-0.0925116	1	1.48295	0.401744	7.2591	0.781055	3.33094	0.10183
194.974	-0.104402	1	1.39609	0.364789	7.12295	0.784476	3.36196	0.106986
195.474	-0.113131	1	1.28688	0.33436	6.92597	0.793354	3.36936	0.112363
195.974	-0.116833	1	1.2454	0.331568	6.69145	0.794584	3.375	0.110296
196.474	-0.115717	1	1.22991	0.339385	6.44251	0.792879	3.37997	0.105371
196.974	-0.108255	1	1.20911	0.350087	6.18184	0.797224	3.40425	0.101604
197.474	-0.0950337	1	1.18739	0.361288	5.91913	0.802616	3.43186	0.0980385
197.974	-0.0773043	1	1.20907	0.381404	5.65007	0.788559	3.46134	0.0931344
198.474	-0.0557909	1	1.2336	0.401015	5.3815	0.772637	3.49117	0.0884991
198.974	-0.0313582	1	1.25617	0.400475	5.12946	0.746838	3.52502	0.0903935
199.474	-0.00733204	1	1.28425	0.403806	4.88814	0.720442	3.56623	0.0925009
199.974	0.0175455	1	1.33817	0.425308	4.69719	0.691239	3.64204	0.0956089
200.474	0.040343	1	1.4099	0.444253	4.5229	0.660276	3.71509	0.0986303
200.974	0.0600186	1	1.53141	0.456044	4.39523	0.624387	3.7804	0.101409
201.474	0.0773839	1	1.67599	0.4678	4.29395	0.588845	3.82314	0.102356
201.974	0.0923316	1	1.85916	0.479497	4.23681	0.553883	3.82812	0.100238
202.474	0.104165	1	2.0272	0.506268	4.1865	0.514709	3.80004	0.0954238
202.974	0.113004	1	2.18011	0.548116	4.14303	0.471321	3.73891	0.0879134
203.474	0.116466	1	2.31679	0.599685	4.09697	0.440428	3.68269	0.0807223
203.974	0.114736	1	2.44188	0.658191	4.04904	0.41845	3.62997	0.0737592
204.474	0.106682	1	2.5976	0.665146	3.9812	0.401801	3.6001	0.0745695
204.974	0.0950813	1	2.7656	0.651411	3.90537	0.38729	3.57939	0.0784998
205.474	0.0769124	1	2.97178	0.577597	4.01216	0.3876	3.54609	0.0814398
205.974	0.0561431	1	3.18616	0.490899	4.15812	0.39109	3.51009	0.0841674
206.474	0.0322321	1	3.36383	0.482987	4.39453	0.396356	3.45905	0.0911363
206.974	0.00705934	1	3.52992	0.485711	4.64288	0.402095	3.40799	0.0983411
207.474	-0.016812	1	3.49344	0.550859	4.95551	0.415343	3.39788	0.100094
207.974	-0.0387555	1	3.44192	0.609761	5.21586	0.428426	3.38875	0.101191
208.474	-0.060711	1	3.30977	0.635177	5.19594	0.44062	3.38484	0.09877
208.974	-0.0779267	1	3.17533	0.638281	5.13685	0.451617	3.38307	0.0957386
209.474	-0.0932689	1	3.03503	0.584121	4.97725	0.45954	3.38678	0.0911409
209.974	-0.105447	1	2.90899	0.536136	4.81112	0.469033	3.38101	0.0896428
210.474	-0.113801	1	2.80309	0.496862	4.63575	0.480739	3.36187	0.0925174
210.974	-0.117543	1	2.69573	0.478106	4.49719	0.490646	3.35672	0.0989921
211.474	-0.116818	1	2.58609	0.491631	4.41655	0.497722	3.37358	0.111131
211.974	-0.108058	1	2.45453	0.502667	4.37705	0.506828	3.40059	0.12511
212.474	-0.0947636	1	2.29048	0.510015	4.39855	0.518941	3.44262	0.141817
212.974	-0.0778855	1	2.14322	0.517155	4.42228	0.526357	3.48667	0.153235
213.474	-0.0559128	1	2.01219	0.524095	4.44818	0.529236	3.53265	0.159548
213.974	-0.0322864	1	1.88057	0.539886	4.4938	0.535741	3.57446	0.164935
214.474	-0.00734136	1	1.74834	0.565025	4.56023	0.546075	3.61186	0.169345
214.974	0.0188972	1	1.63447	0.600738	4.56167	0.5376	3.60746	0.172789
215.474	0.0407706	1	1.53196	0.642987	4.52294	0.517497	3.57722	0.175636
215.974	0.0608382	1	1.48167	0.682076	4.42113	0.488252	3.50448	0.181473
216.474	0.0796717	1	1.44881	0.72011	4.29827	0.455957	3.41756	0.188308
216.974	0.0946221	1	1.45347	0.745489	4.11666	0.427503	3.32138	0.195631
217.474	0.107107	1	1.46316	0.769176	3.92719	0.399563	3.22396	0.203019
217.974	0.114915	1	1.50801	0.727971	3.76979	0.392081	3.14395	0.200848
218.474	0.117582	1	1.55387	0.682259	3.62375	0.386817	3.06642	0.197753
218.974	0.11561	1	1.59241	0.621741	3.58218	0.394692	3.0065	0.189719
219.474	0.107858	1	1.64077	0.563531	3.55847	0.403372	2.94747	0.180159
219.974	0.0935852	1	1.72519	0.513796	3.60041	0.415009	2.8917	0.164994
220.474	0.0761378	1	1.79813	0.476201	3.64506	0.422431	2.84642	0.150853
220.974	0.0550442	1	1.84955	0.46139	3.69481	0.421942	2.8208	0.138633
221.474	0.0302342	1	1.87615	0.454886	3.72118	0.434379	2.80829	0.130279
221.974	0.00568369	1	1.87489	0.457704	3.72132	0.461321	2.81048	0.126263
222.474	-0.0184948	1	1.8314	0.449875	3.68208	0.476273	2.81688	0.127334
222.974	-0.0419014	1	1.75443	0.433607	3.61163	0.481721	2.82661	0.132436
223.474	-0.0619543	1	1.68062	0.431342	3.52415	0.496617	2.82382	0.136317
223.974	-0.0802185	1	1.60822	0.435263	3.42915	0.515686	2.81549	0.139659
224.474	-0.0958931	1	1.54872	0.420207	3.34836	0.507448	2.8097	0.140495
224.974	-0.107457	1	1.49205	0.40098	3.27069	0.493209	2.80447	0.14078
225.474	-0.115771	1	1.43436	0.398345	3.25358	0.50557	2.83856	0.141273
225.974	-0.118856	1	1.3756	0.398428	3.24471	0.520366	2.87523	0.142589
226.474	-0.11579	1	1.28574	0.426746	3.28435	0.51779	2.85326	0.169919
226.974	-0.107359	1	1.2022	0.461125	3.33507	0.518368	2.81752	0.196998
227.474	-0.094614	1	1.15159	0.52705	3.44338	0.535363	2.71018	0.222774
227.974	-0.076163	1	1.11742	0.604071	3.54291	0.548129	2.57264	0.243294
228.474	-0.0542326	1	1.12292	0.707869	3.62123	0.550691	2.36222	0.25113
228.974	-0.0300118	1	1.17457	0.801639	3.70137	0.567189	2.17544	0.2494
229.474	-0.00473442	1	1.29086	0.881368	3.78404	0.603202	2.02179	0.234274
229.974	0.019444	1	1.41843	0.944313	3.85333	0.659892	1.92622	0.21602
230.474	0.0412724	1	1.55699	0.990912	3.90958	0.73672	1.88723	0.194719
230.974	0.0621039	1	1.69499	0.990583	3.97773	0.83651	1.87618	0.181407
231.474	0.0797618	1	1.83264	0.961368	4.05319	0.950433	1.88233	0.173014
231.974	0.0945347	1	1.89322	0.930007	4.11789	1.0964	1.90198	0.166524
232.474	0.106318	1	1.9285	0.897941	4.17905	1.2529	1.92605	0.160659
232.974	0.114081	1	1.9418	0.874741	4.21082	1.37653	1.89839	0.165102
233.474	0.117055	1	1.95069	0.853325	4.23669	1.49355	1.86033	0.171619
233.974	0.116027	1	1.95319	0.862346	4.2719	1.62038	1.80545	0.176823
234.474	0.10883	1	1.96382	0.871014	4.30353	1.74458	1.74873	0.181511
234.974	0.0951383	1	2.07968	0.85865	4.28526	1.83048	1.67814	0.180441
235.474	0.0771189	1	2.19384	0.846149	4.26936	1.91407	1.60623	0.178377
235.974	0.0566794	1	2.29815	0.832864	4.26716	1.98434	1.52666	0.170597
236.474	0.0321143	1	2.39227	0.816996	4.25991	2.0538	1.45045	0.162765
236.974	0.00822048	1	2.45743	0.793801	4.23834	2.121	1.38376	0.154784
237.474	-0.0165022	1	2.47969	0.769121	4.22336	2.18434	1.31665	0.148243
237.974	-0.0397393	1	2.42903	0.741914	4.21958	2.24115	1.24882	0.144147
238.474	-0.0595645	1	2.36293	0.717334	4.21169	2.32744	1.18599	0.136757
238.974	-0.0766001	1	2.27859	0.695855	4.19895	2.44857	1.12908	0.125474
239.474	-0.0927539	1	2.17334	0.667596	4.25589	2.55821	1.07457	0.115365
239.974	-0.104782	1	2.05333	0.634543	4.36211	2.65974	1.02176	0.106086
240.474	-0.113928	1	1.94334	0.602072	4.49407	2.75599	0.977186	0.0975698
240.974	-0.117692	1	1.8377	0.569853	4.63716	2.84996	0.93618	0.0893835
241.474	-0.115894	1	1.72706	0.550111	4.75188	2.93047	0.902252	0.0851114
241.974	-0.108185	1	1.61505	0.53377	4.85888	3.00732	0.870253	0.0819064
242.474	-0.0968237	1	1.54773	0.522413	4.82066	3.09748	0.850826	0.083694
242.974	-0.0785025	1	1.48608	0.512151	4.76711	3.18786	0.832587	0.0859018
243.474	-0.0568144	1	1.47957	0.526946	4.66187	3.23456	0.813123	0.0854852
243.974	-0.0336925	1	1.47564	0.542635	4.55734	3.2811	0.793518	0.0852635
244.474	-0.00842303	1	1.49271	0.565595	4.45853	3.32642	0.772774	0.0866254
244.974	0.0157104	1	1.51932	0.597196	4.37436	3.37648	0.751819	0.0884434
245.474	0.0374912	1	1.57868	0.658456	4.34046	3.44281	0.730143	0.0918268
245.974	0.0588522	1	1.61928	0.71324	4.31459	3.50955	0.706829	0.0981365
246.474	0.07633	1	1.62553	0.756163	4.30343	3.57706	0.680516	0.109805
246.974	0.0912777	1	1.63503	0.782747	4.31495	3.64866	0.657651	0.121582
247.474	0.10429	1	1.64892	0.787281	4.35707	3.72579	0.63944	0.133505
247.974	0.112717	1	1.62786	0.789074	4.40011	3.79434	0.618061	0.14293
248.474	0.116436	1	1.57812	0.788617	4.4439	3.85585	0.59408	0.150304
248.974	0.115542	1	1.55895	0.784981	4.49835	3.96932	0.566864	0.150115
249.474	0.108123	1	1.55559	0.779702	4.55831	4.10965	0.537976	0.146015
249.974	0.0947914	1	1.59043	0.779537	4.58336	4.18392	0.508507	0.143067
250.474	0.0783754	1	1.63833	0.781122	4.59646	4.23557	0.47884	0.140513
250.974	0.0567151	1	1.67272	0.761483	4.60226	4.28807	0.453089	0.136312
251.474	0.0330662	1	1.7052	0.738857	4.60703	4.3407	0.427889	0.13188
251.974	0.008848	1	1.69699	0.708535	4.60676	4.3394	0.41025	0.131538
252.474	-0.0158971	1	1.68334	0.677784	4.61051	4.34419	0.392314	0.131219
252.974	-0.0389317	1	1.60649	0.642351	4.66297	4.42592	0.370322	0.130921
253.474	-0.0586523	1	1.53151	0.608664	4.71207	4.49418	0.34738	0.130894
253.974	-0.0773535	1	1.46347	0.581515	4.7486	4.51205	0.320877	0.13188
254.474	-0.0919794	1	1.40114	0.557556	4.79112	4.54875	0.297581	0.131788
254.974	-0.104377	1	1.34996	0.539828	4.84534	4.62227	0.28055	0.129592
255.474	-0.113461	1	1.29416	0.529208	4.88292	4.67685	0.2637	0.130931
255.974	-0.116833	1	1.23282	0.52713	4.9005	4.70868	0.24707	0.136517
256.474	-0.114778	1	1.17375	0.527121	4.92493	4.77201	0.239869	0.140762
256.974	-0.107903	1	1.1164	0.52867	4.95452	4.85908	0.23977	0.143996
257.474	-0.09602	1	1.06423	0.508438	4.94048	4.93755	0.24675	0.149849
257.974	-0.0784178	1	1.01463	0.477379	4.90477	5.01175	0.257249	0.157004
258.474	-0.0571044	1	0.976848	0.453672	4.79641	5.14629	0.271341	0.157321
258.974	-0.032804	1	0.941981	0.431778	4.67014	5.29571	0.286318	0.155953
259.474	-0.00742207	1	0.884989	0.408974	4.52153	5.39682	0.298785	0.165752
259.974	0.0168689	1	0.826112	0.386343	4.37098	5.49348	0.310991	0.176483
260.474	0.0396162	1	0.740478	0.487659	4.1709	5.36767	0.296356	0.191116
260.974	0.0608951	1	0.65741	0.590403	3.97538	5.21767	0.28067	0.211598
261.474	0.0782379	1	0.593528	0.703816	3.81392	4.88688	0.257122	0.275795
261.974	0.0932306	1	0.560803	0.815768	3.6412	4.54079	0.232982	0.352854
262.474	0.105042	1	0.627836	0.923045	3.43244	4.14577	0.206951	0.471094
262.974	0.113137	1	0.682168	1.02993	3.2379	3.81964	0.19169	0.62126
263.474	0.11714	1	0.709686	1.13599	3.07336	3.63899	0.199168	0.838836
263.974	0.116681	1	0.7423	1.26658	2.90631	3.49061	0.21444	1.09766
264.474	0.108534	1	0.781175	1.42731	2.73617	3.38185	0.239284	1.40715
264.974	0.0956825	1	0.749036	1.59869	2.59473	3.29785	0.26351	1.7881
265.474	0.0787223	1	0.661463	1.77838	2.47568	3.23319	0.287253	2.22484
265.974	0.0573639	1	0.604895	1.92611	2.37367	3.11966	0.292461	2.69499
266.474	0.0328835	1	0.565214	2.05643	2.28093	2.97951	0.287575	3.18333
266.974	0.00877257	1	0.499299	2.12216	2.2139	2.8172	0.266301	3.69077
267.474	-0.0169364	1	0.425707	2.16898	2.15441	2.64839	0.240231	4.20381
267.974	-0.0387873	1	0.347342	2.15468	2.09793	2.48241	0.323482	4.68998
268.474	-0.0590495	1	0.268346	2.1323	2.04185	2.3168	0.421191	5.17259
268.974	-0.077801	1	0.214716	2.40891	1.95313	2.34955	0.535814	5.58428
269.474	-0.0931882	1	0.163398	2.70123	1.8619	2.39522	0.651899	5.9945
269.974	-0.105127	1	0.13537	3.10133	1.74748	2.54854	0.782367	6.41164
270.474	-0.114557	1	0.114775	3.51067	1.64362	2.70333	0.890825	6.79873
270.974	-0.118084	1	0.125216	3.95856	1.58389	2.86427	0.907371	7.06029
271.474	-0.116771	1	0.124718	4.30025	1.5376	2.96739	0.92365	7.29855
271.974	-0.109047	1	0.096479	4.37261	1.52538	2.92385	0.939256	7.47774
272.474	-0.0956506	1	0.069946	4.41741	1.47715	2.86544	0.948111	7.64119
272.974	-0.0775015	1	0.0470588	4.40335	1.35198	2.77528	0.942545	7.77102
273.474	-0.0569521	1	0.0237713	4.39909	1.2099	2.68541	0.922954	7.89817
273.974	-0.0327365	1	0	4.40667	1.04739	2.59591	0.886415	8.02207
274.474	-0.0077491	1	0.01545	4.40945	0.871276	2.51092	0.825748	8.13968
274.974	0.0166889	1	0.0606332	4.4086	0.684848	2.42933	0.74679	8.25252
275.474	0.0397909	1	0.0946798	4.35829	0.609486	2.35186	0.681537	8.35725
275.974	0.0603708	1	0.123913	4.28661	0.582132	2.27616	0.622208	8.45847
276.474	0.0779334	1	0.184826	4.21033	0.55596	2.19708	0.575848	8.55449
276.974	0.0938899	-1	0.253239	4.13297	0.530067	2.11719	0.532558	8.64928
277.474	0.106093	-1	0.292777	4.09215	0.523795	2.02314	0.523741	8.70963
277.974	0.1143	-1	0.329855	4.05857	0.519564	1.92648	0.515941	8.75675
278.474	0.117433	-1	0.370377	4.09878	0.519992	1.80487	0.467548	8.61252
278.974	0.115181	-1	0.416041	4.12627	0.512521	1.68268	0.41747	8.46054
279.474	0.106989	-1	0.487496	4.09001	0.465422	1.55757	0.358932	8.26963
279.974	0.0936104	-1	0.553255	4.04633	0.418771	1.44389	0.298401	8.08449
280.474	0.0761007	-1	0.602643	3.98138	0.373406	1.36304	0.232138	7.9159
280.974	0.054308	-1	0.639956	3.90141	0.326453	1.29435	0.182632	7.75662
281.474	0.0305043	-1	0.658553	3.79816	0.277039	1.24449	0.159091	7.61177
281.974	0.00610602	-1	0.669273	3.72928	0.248711	1.21065	0.14394	7.47536
282.474	-0.0185345	-1	0.672425	3.69341	0.240643	1.1922	0.136848	7.34707
282.974	-0.0405827	-1	0.681077	3.69213	0.23619	1.17073	0.131118	7.20459
283.474	-0.0608276	-1	0.693497	3.71453	0.234213	1.14718	0.126319	7.0524
283.974	-0.0791196	-1	0.712225	3.82288	0.248634	1.15412	0.125523	6.96526
284.474	-0.0939204	-1	0.733318	3.96343	0.2692	1.17247	0.126226	6.9025
284.974	-0.106098	-1	0.715299	4.09139	0.294344	1.17219	0.125705	6.85947
285.474	-0.114498	-1	0.690764	4.21726	0.320251	1.16881	0.124981	6.81973
285.974	-0.117827	-1	0.637194	4.47025	0.323316	1.17455	0.137923	6.77029
286.474	-0.116162	-1	0.586129	4.71538	0.324925	1.17878	0.153497	6.71378
286.974	-0.108542	-1	0.565501	4.85887	0.315589	1.1662	0.193553	6.58692
287.474	-0.0954256	-1	0.55527	5.0096	0.308629	1.15671	0.230341	6.46045
287.974	-0.0772288	-1	0.598978	5.19793	0.313989	1.16322	0.250169	6.33605
288.474	-0.0564172	-1	0.635208	5.34047	0.324705	1.16558	0.270071	6.23893
288.974	-0.0320719	-1	0.652804	5.36891	0.348763	1.1576	0.290154	6.20981
289.474	-0.00681442	-1	0.657808	5.40372	0.377999	1.1472	0.306426	6.1626
289.974	0.0178433	-1	0.643687	5.44822	0.415098	1.13312	0.31691	6.0879
290.474	0.0410778	-1	0.618854	5.52544	0.421688	1.12168	0.371037	6.01538
290.974	0.06152	-1	0.582711	5.6372	0.396062	1.113	0.471246	5.94515
291.474	0.078553	-1	0.575292	5.8309	0.355066	1.10256	0.570206	5.88511
291.974	0.0942024	-1	0.586751	6.07845	0.303968	1.09094	0.668345	5.83176
292.474	0.106276	-1	0.610958	6.24984	0.227738	1.07328	0.752003	5.89458
292.974	0.114298	-1	0.640113	6.39167	0.141755	1.05326	0.83004	6.00247
293.474	0.11771	-1	0.634416	6.3892	0.0973933	1.0039	0.872609	6.05662
293.974	0.116503	-1	0.620797	6.35392	0.0624918	0.947872	0.907116	6.09854
294.474	0.108554	-1	0.584525	6.14564	0.115262	0.897662	0.927051	6.13148
294.974	0.0965563	-1	0.545559	5.92936	0.175168	0.847389	0.947964	6.15587
295.474	0.0785422	-1	0.487973	5.73677	0.263725	0.791936	0.992677	6.0742
295.974	0.0561247	-1	0.432376	5.55304	0.349579	0.742504	1.03451	6.00105
296.474	0.0326135	-1	0.387332	5.41641	0.421087	0.725017	1.06109	5.97307
296.974	0.00734136	-1	0.348849	5.29742	0.466328	0.710427	1.0924	5.92418
297.474	-0.0175362	-1	0.327714	5.22512	0.442113	0.703499	1.13625	5.82001
297.974	-0.0390349	-1	0.313094	5.1989	0.413387	0.701466	1.16616	5.7503
298.474	-0.0599988	-1	0.307928	5.23952	0.378119	0.706537	1.17584	5.73059
298.974	-0.0771469	-1	0.280791	5.31185	0.33022	0.710801	1.18421	5.69
299.474	-0.0909931	-1	0.234877	5.41127	0.271526	0.714376	1.19145	5.63158
299.974	-0.103416	-1	0.221356	5.58901	0.240002	0.716791	1.17238	5.60379
300.474	-0.112145	-1	0.224673	5.80745	0.222599	0.718603	1.13963	5.59193
300.974	-0.115847	-1	0.237615	6.00634	0.231153	0.715835	1.09526	5.55216
301.474	-0.114993	-1	0.253939	6.19836	0.248828	0.711458	1.04682	5.50258
301.974	-0.108585	-1	0.322512	6.27246	0.316462	0.700536	0.989038	5.55516
302.474	-0.0952707	-1	0.399309	6.32799	0.39196	0.688584	0.92979	5.62383
302.974	-0.0787673	-1	0.439035	6.1749	0.484043	0.657841	0.881442	5.71818
303.474	-0.0574367	-1	0.47901	6.01821	0.56707	0.625735	0.834278	5.81636
303.974	-0.0327789	-1	0.524531	5.83494	0.544184	0.579228	0.800026	5.95693
304.474	-0.00815824	-1	0.55937	5.66562	0.518759	0.526369	0.765537	6.07985
304.974	0.0167193	-1	0.550835	5.55292	0.483027	0.447719	0.730086	6.13111
305.474	0.040151	-1	0.539433	5.47728	0.432755	0.376147	0.699089	6.16792
305.974	0.0591647	-1	0.521765	5.48268	0.350687	0.320051	0.677835	6.17312
306.474	0.0771866	-1	0.510842	5.47036	0.293758	0.273609	0.653547	6.15124
306.974	0.0921621	-1	0.509976	5.43158	0.274316	0.241565	0.624734	6.08895
307.474	0.103771	-1	0.533688	5.4198	0.25079	0.237799	0.607852	6.00527
307.974	0.112015	-1	0.580307	5.43318	0.223458	0.260389	0.602089	5.90166
308.474	0.116613	-1	0.622344	5.40083	0.204254	0.273773	0.59635	5.79593
308.974	0.115015	-1	0.66188	5.34353	0.189484	0.282134	0.590624	5.68904
309.474	0.108297	-1	0.666748	5.28659	0.192839	0.310892	0.592107	5.56777
309.974	0.0961975	-1	0.659001	5.22979	0.202789	0.347071	0.596214	5.44126
310.474	0.0782456	-1	0.646785	5.22016	0.204671	0.391887	0.596142	5.32766
310.974	0.0564225	-1	0.633713	5.21956	0.205007	0.438358	0.59527	5.21653
311.474	0.0323618	-1	0.646294	5.11297	0.211905	0.490583	0.648402	5.15928
311.974	0.00592334	-1	0.660794	5.00779	0.218558	0.541138	0.704883	5.10496
312.474	-0.017948	-1	0.697262	5.04462	0.212527	0.54432	0.790481	5.06959
312.974	-0.0403033	-1	0.735473	5.06992	0.207572	0.541237	0.87713	5.03566
313.474	-0.0611228	-1	0.782051	5.03991	0.207782	0.508072	0.96882	5.0086
313.974	-0.0784881	-1	0.82201	5.08466	0.206463	0.481232	1.03295	4.97154
314.474	-0.0927764	-1	0.846433	5.30485	0.201556	0.469235	1.03241	4.91098
314.974	-0.10463	-1	0.857224	5.45857	0.194381	0.466834	1.01644	4.85041
315.474	-0.113029	-1	0.846384	5.50682	0.183606	0.479656	0.975985	4.78982
315.974	-0.116993	-1	0.803912	5.54248	0.175206	0.501249	0.921447	4.76309
316.474	-0.115832	-1	0.732242	5.56653	0.168996	0.530938	0.853912	4.76763
316.974	-0.108258	-1	0.656237	5.54766	0.163736	0.552287	0.810294	4.81471
317.474	-0.0945266	-1	0.577494	5.50166	0.159075	0.568365	0.781789	4.88867
317.974	-0.077017	-1	0.527583	5.60971	0.141337	0.593391	0.762831	4.99557
318.474	-0.0557433	-1	0.490493	5.78625	0.117783	0.622396	0.748117	5.11712
318.974	-0.0317224	-1	0.491025	5.91155	0.0921547	0.63036	0.752562	5.16677
319.474	-0.00765116	-1	0.499373	6.0262	0.0660949	0.633953	0.760986	5.2015
319.974	0.0172264	-1	0.594992	6.06228	0.037471	0.649006	0.768481	5.16372
320.474	0.0399114	-1	0.69443	6.08867	0.01042	0.663267	0.776786	5.12021
320.974	0.0596241	-1	0.790924	6.04555	0.00294075	0.662173	0.794955	5.04953
321.474	0.0778936	-1	0.887593	6.03024	0	0.6663	0.81334	4.98984
321.974	0.093588	-1	0.985025	6.13668	0.0169213	0.693274	0.832673	4.97822
322.474	0.105966	-1	1.08825	6.18128	0.0752201	0.700448	0.848208	4.97528
322.974	0.115089	-1	1.20578	6.07296	0.235813	0.658672	0.854354	4.99381
323.474	0.118569	-1	1.35878	5.96634	0.413544	0.61746	0.839904	5.00602
323.974	0.116401	-1	1.56278	5.86216	0.615914	0.577061	0.795841	5.00913
324.474	0.10804	-1	1.71875	5.58008	0.782986	0.515533	0.756253	4.97811
324.974	0.0953183	-1	1.82851	5.12694	0.916117	0.433687	0.720967	4.91428
325.474	0.0774089	-1	1.82474	4.81438	0.917	0.381201	0.776693	4.84307
325.974	0.0564199	-1	1.74303	4.59831	0.827115	0.348866	0.894883	4.76678
326.474	0.0315476	-1	1.56164	4.29837	0.694382	0.325569	1.03431	4.7487
326.974	0.00666743	-1	1.34099	3.96539	0.54477	0.305833	1.18211	4.75355
327.474	-0.0168491	-1	1.17936	3.90882	0.43438	0.30953	1.29861	4.78169
327.974	-0.0396215	-1	1.02835	3.90204	0.331052	0.317448	1.40947	4.81404
328.474	-0.0612923	-1	0.948162	3.89547	0.287646	0.299338	1.37553	4.84571
328.974	-0.0793593	-1	0.873385	3.88963	0.251741	0.277492	1.33333	4.87417
329.474	-0.095206	-1	0.807922	3.89636	0.275915	0.221004	1.32229	4.84583
329.974	-0.106752	-1	0.74314	3.90586	0.297681	0.181679	1.3123	4.82271
330.474	-0.115242	-1	0.681443	3.92796	0.308531	0.220112	1.30704	4.82322
330.974	-0.118749	-1	0.631518	3.99616	0.341148	0.263745	1.30236	4.81353
331.474	-0.116709	-1	0.613261	4.18838	0.432319	0.321365	1.29927	4.77641
331.974	-0.108365	-1	0.600551	4.35114	0.515341	0.389425	1.28297	4.75225
332.474	-0.0951608	-1	0.596624	4.46721	0.585456	0.474021	1.24575	4.74859
332.974	-0.0772341	-1	0.601671	4.42265	0.645577	0.521165	1.20122	4.7536
333.474	-0.055546	-1	0.615187	4.22645	0.696263	0.532952	1.14979	4.76679
333.974	-0.0318746	-1	0.624434	3.91784	0.708556	0.565071	1.10748	4.82558
334.474	-0.00734927	-1	0.631365	3.54828	0.700029	0.608216	1.07011	4.90908
334.974	0.0180552	-1	0.68083	3.35808	0.693211	0.647765	1.02872	4.97584
335.474	0.0404979	-1	0.74323	3.22242	0.686912	0.686221	0.986104	5.03751
335.974	0.0610275	-1	0.861169	3.24609	0.70829	0.760388	0.944259	5.05153
336.474	0.0793844	-1	0.989001	3.29815	0.734597	0.840918	0.902551	5.05707
336.974	0.0943996	-1	1.19177	3.42466	0.789489	0.957091	0.856806	4.95303
337.474	0.106732	-1	1.40286	3.56455	0.865512	1.08386	0.810604	4.84278
337.974	0.114872	-1	1.67094	3.80495	1.11762	1.29472	0.761258	4.70052
338.474	0.11787	-1	2.00219	4.04085	1.38016	1.52607	0.713724	4.55168
338.974	0.116314	-1	2.59963	4.25773	1.68666	1.84369	0.673825	4.37516
339.474	0.108627	-1	3.13956	4.45232	2.00979	2.15907	0.633944	4.20356
339.974	0.0946537	-1	3.5583	4.59993	2.36797	2.46971	0.594105	4.04237
340.474	0.0766344	-1	3.89108	4.655	2.65488	2.73856	0.558689	3.88014
340.974	0.0556281	1	4.1135	4.59123	2.85029	2.95372	0.528955	3.7166
341.474	0.0317846	1	4.095	4.54887	3.06477	3.08812	0.495395	3.56852
341.974	0.00734136	1	3.85393	4.52631	3.29688	3.1479	0.458302	3.43473
342.474	-0.0170066	1	3.61229	4.47013	3.50893	3.19493	0.417665	3.29702
342.974	-0.0405906	1	3.37033	4.39584	3.71019	3.23509	0.375118	3.15719
343.474	-0.0607905	1	3.19955	4.26635	3.91121	3.32718	0.330677	3.018
343.974	-0.078308	1	3.04941	4.12086	4.11217	3.43434	0.285688	2.87899
344.474	-0.0936331	1	2.93287	3.99267	4.26257	3.68518	0.249846	2.73667
344.974	-0.106053	1	2.82212	3.86747	4.40425	3.96083	0.215583	2.59379
345.474	-0.114912	1	2.72046	3.74818	4.51023	4.22741	0.186144	2.46399
345.974	-0.118064	-1	2.61743	3.63308	4.6107	4.4888	0.157943	2.33662
346.474	-0.115585	-1	2.49169	3.56428	4.66953	4.69422	0.141275	2.22929
346.974	-0.107281	-1	2.37186	3.49023	4.71831	4.8759	0.125594	2.12167
347.474	-0.0943386	-1	2.28249	3.38917	4.71545	4.93552	0.114995	2.01253
347.974	-0.0771362	-1	2.21108	3.29762	4.71796	4.9777	0.104151	1.90904
348.474	-0.0558175	-1	2.18356	3.22934	4.7336	4.9773	0.0927092	1.81932
348.974	-0.0319766	-1	2.15197	3.16352	4.74319	4.95803	0.0824375	1.73926
349.474	-0.00729371	-1	2.11441	3.10131	4.74389	4.91108	0.073883	1.67339
349.974	0.0179135	-1	2.01878	3.03	4.71612	4.82394	0.0653978	1.63549
350.474	0.039914	-1	1.863	2.94927	4.65885	4.69519	0.0569843	1.62654
350.974	0.0607931	-1	1.67665	2.89462	4.4846	4.56106	0.0572814	1.65232
351.474	0.0793698	-1	1.47181	2.85577	4.23955	4.42369	0.0628497	1.6991
351.974	0.0946869	-1	1.3072	2.8103	3.91872	4.25216	0.0652168	1.76758
352.474	0.106845	-1	1.15582	2.76265	3.57295	4.0694	0.0665304	1.8432
352.974	0.115089	-1	1.06437	2.79145	3.2598	3.88166	0.078678	1.94697
353.474	0.11749	-1	0.980612	2.83004	2.95088	3.6933	0.0922126	2.05436
353.974	0.116021	-1	0.9639	2.82396	2.76004	3.5231	0.101859	2.18443
354.474	0.108512	-1	0.942795	2.81647	2.57184	3.35371	0.112363	2.3178
354.974	0.0945412	-1	0.863688	2.79041	2.41851	3.19509	0.134205	2.49474
355.474	0.0765444	-1	0.797063	2.76326	2.27719	3.04251	0.153537	2.66891
355.974	0.0556506	1	0.781834	2.73162	2.18529	2.91482	0.162531	2.83164
356.474	0.030928	1	0.768765	2.69397	2.09876	2.78871	0.167232	2.98981
356.974	0.00659727	1	0.760448	2.6431	2.02403	2.66608	0.162492	3.13794
357.474	-0.0185	1	0.761435	2.59958	1.95665	2.55514	0.156468	3.28073
357.974	-0.0419742	1	0.77646	2.56718	1.90037	2.46182	0.148503	3.41546
358.474	-0.0612976	1	0.786717	2.53254	1.83142	2.36956	0.138846	3.552
358.974	-0.0784179	1	0.792573	2.49585	1.75078	2.27829	0.127625	3.69019
359.474	-0.0936754	1	0.79728	2.51788	1.66572	2.18267	0.129589	3.81189
359.974	-0.105304	1	0.801347	2.57262	1.5782	2.08463	0.138899	3.92439
360.474	-0.113746	1	0.853637	2.616	1.49424	1.9718	0.151893	3.99594
360.974	-0.11696	1	0.923583	2.65522	1.41159	1.85356	0.166237	4.0525
361.474	-0.114533	1	1.02043	2.71321	1.35097	1.76346	0.173341	4.09382
361.974	-0.106981	1	1.12202	2.7745	1.29424	1.67832	0.179168	4.13246
362.474	-0.0948788	1	1.05784	2.81915	1.2543	1.65161	0.167621	4.17292
362.974	-0.0775863	1	0.984748	2.85721	1.21625	1.63005	0.156026	4.21697
363.474	-0.056073	1	0.838787	2.7953	1.20169	1.6669	0.151179	4.31868
363.974	-0.0322943	1	0.684541	2.74973	1.18627	1.6986	0.149504	4.43507
364.474	-0.00706725	1	0.488003	2.78759	1.16651	1.70403	0.164018	4.62638
364.974	0.0167643	1	0.3382	2.8452	1.1516	1.72315	0.1879	4.81454
365.474	0.0389171	1	0.297862	2.94911	1.14806	1.77434	0.233722	4.99532
365.974	0.0599538	1	0.27744	3.1141	1.11296	1.81	0.263138	5.15358
366.474	0.0781306	1	0.288886	3.37681	1.02735	1.82082	0.266303	5.27582
366.974	0.0930108	1	0.304048	3.56033	0.941398	1.84207	0.266699	5.3378
367.474	0.105124	1	0.322655	3.67044	0.855125	1.87297	0.26453	5.34391
367.974	0.113593	1	0.347173	3.6996	0.756274	1.85642	0.246445	5.32987
368.474	0.117183	1	0.375173	3.68106	0.650011	1.81191	0.21898	5.30396
368.974	0.115697	1	0.383831	3.65646	0.615143	1.76175	0.227876	5.25619
369.474	0.108717	1	0.386467	3.62998	0.602502	1.70982	0.248092	5.2016
369.974	0.0954031	1	0.379625	3.6207	0.573397	1.65134	0.262172	5.13944
370.474	0.0782629	1	0.371676	3.61343	0.54237	1.59209	0.275535	5.07639
370.974	0.0566396	1	0.347601	3.64515	0.482455	1.53921	0.279	5.02861
371.474	0.0319845	1	0.32768	3.67566	0.422753	1.48767	0.277369	4.98891
371.974	0.00765644	1	0.353901	3.68591	0.37097	1.44885	0.225016	5.02977
372.474	-0.0169589	1	0.375451	3.66664	0.323042	1.40852	0.171634	5.08381
372.974	-0.0405707	-1	0.379889	3.53919	0.289244	1.36267	0.11448	5.18608
373.474	-0.0603086	-1	0.389686	3.39319	0.271442	1.31139	0.0614464	5.29435
373.974	-0.0785927	-1	0.413482	3.1987	0.295434	1.24592	0.019179	5.41829
374.474	-0.0934305	-1	0.422094	3.00601	0.30289	1.18172	0	5.52097
374.974	-0.104864	-1	0.408323	2.81596	0.285971	1.11939	0.0148537	5.59231
375.474	-0.113444	-1	0.406518	2.69854	0.272991	1.06146	0.0390174	5.63867
375.974	-0.117715	-1	0.416208	2.6509	0.263796	1.00774	0.0721258	5.66104
376.474	-0.115652	-1	0.431376	2.61864	0.246677	0.962247	0.0988999	5.64754
376.974	-0.108078	-1	0.450096	2.59636	0.22442	0.922087	0.121566	5.61078
377.474	-0.0957076	-1	0.445145	2.57254	0.206152	0.880527	0.121583	5.53774
377.974	-0.0777809	-1	0.431885	2.54819	0.189284	0.838476	0.11365	5.45196
378.474	-0.0570368	-1	0.436645	2.53244	0.167415	0.815842	0.0892708	5.38327
378.974	-0.0333482	-1	0.444286	2.51806	0.144747	0.796311	0.0622634	5.3173
379.474	-0.00732149	-1	0.441327	2.5293	0.193135	0.776845	0.0486526	5.23819
379.974	0.0165498	-1	0.440243	2.54492	0.245431	0.757663	0.0364039	5.16324
380.474	0.0389051	-1	0.46854	2.59725	0.299967	0.741858	0.0321322	5.14684
380.974	0.0601788	-1	0.496072	2.64024	0.359854	0.7248	0.030268	5.12223
381.474	0.0776341	-1	0.520343	2.64338	0.442579	0.702394	0.0386801	5.06251
381.974	0.0932385	-1	0.547443	2.68481	0.502522	0.692291	0.0742673	5.00377
382.474	0.105749	-1	0.582424	2.83292	0.499017	0.716448	0.185537	4.94774
382.974	0.114016	-1	0.617151	2.98543	0.485621	0.732271	0.311854	4.88472
383.474	0.117582	-1	0.651495	3.14453	0.457386	0.735593	0.460743	4.81121
383.974	0.116816	-1	0.701993	3.31099	0.416384	0.735638	0.61153	4.74517
384.474	0.109044	-1	0.767189	3.48414	0.363766	0.7327	0.764043	4.68594
384.974	0.0963669	-1	0.830024	3.65478	0.358302	0.712102	0.826171	4.67307
385.474	0.079559	-1	0.891374	3.82384	0.382508	0.680391	0.831428	4.68937
385.974	0.0573215	-1	0.99925	3.85139	0.473776	0.677736	0.775849	4.68737
386.474	0.0333429	-1	1.12454	3.82596	0.590152	0.685959	0.697494	4.67852
386.974	0.00888246	-1	1.17871	3.8224	0.750126	0.695585	0.611788	4.67768
387.474	-0.0166319	-1	1.2212	3.82242	0.917256	0.70544	0.524874	4.67816
387.974	-0.0392745	-1	1.23423	3.70781	1.00856	0.691518	0.494445	4.63303
388.474	-0.0595817	-1	1.2352	3.61048	1.09326	0.675583	0.471382	4.58879
388.974	-0.0781982	-1	1.12876	3.67678	1.12292	0.642893	0.511556	4.55544
389.474	-0.0928837	-1	1.05564	3.7547	1.1334	0.611906	0.546471	4.52434
389.974	-0.105324	-1	1.12164	3.88119	1.06383	0.588033	0.559422	4.50266
390.474	-0.113661	-1	1.17178	3.9757	1.03242	0.568323	0.569684	4.48389
390.974	-0.117383	-1	1.18813	4.00202	1.08241	0.557489	0.574211	4.47135
391.474	-0.115827	-1	1.18782	4.02873	1.12802	0.547962	0.570698	4.44663
391.974	-0.108714	-1	1.16724	4.05593	1.16827	0.540024	0.5574	4.40709
392.474	-0.0954256	-1	1.07643	4.03818	1.18748	0.531654	0.568386	4.35892
392.974	-0.0776062	-1	0.92552	3.98195	1.18868	0.522912	0.600159	4.30336
393.474	-0.0566251	-1	0.792079	3.96854	1.09906	0.515011	0.624081	4.25285
393.974	-0.0324545	-1	0.668338	3.9789	0.959021	0.507576	0.643644	4.20514
394.474	-0.00693749	-1	0.626824	3.92401	0.824054	0.50676	0.691625	4.1858
394.974	0.0171086	-1	0.609541	3.84989	0.690581	0.507894	0.747981	4.17483
395.474	0.0401431	-1	0.593186	3.83059	0.57528	0.514338	0.786496	4.21563
395.974	0.0603232	-1	0.577553	3.81635	0.462708	0.521269	0.823467	4.26098
396.474	0.0779956	-1	0.594642	3.76932	0.394405	0.524916	0.876212	4.26479
396.974	0.093408	-1	0.608537	3.70686	0.325651	0.529122	0.924673	4.27434
397.474	0.105611	-1	0.596795	3.52048	0.253277	0.53782	0.938745	4.32999
397.974	0.113289	-1	0.58914	3.32533	0.195459	0.542251	0.948614	4.37561
398.474	0.116768	-1	0.594788	3.10163	0.185023	0.532799	0.944806	4.3886
398.974	0.11539	-1	0.590349	2.87056	0.176137	0.528314	0.942146	4.4081
399.474	0.107356	-1	0.56766	2.62615	0.170055	0.532817	0.941562	4.43937
399.974	0.095031	-1	0.532211	2.51269	0.1563	0.53667	0.945625	4.44634
400.474	0.0775465	-1	0.479847	2.57281	0.132374	0.539663	0.955847	4.4211
400.974	0.0548046	-1	0.425054	2.6524	0.120111	0.547494	0.986033	4.37534
401.474	0.0315052	-1	0.368381	2.74706	0.11687	0.559069	1.03166	4.3137
401.974	0.00710699	-1	0.366312	2.78674	0.19102	0.566248	1.12492	4.25672
402.474	-0.0180578	-1	0.388071	2.80243	0.298941	0.571509	1.23896	4.20176
402.974	-0.0397141	-1	0.463902	2.67882	0.472982	0.584617	1.34811	4.16773
403.474	-0.0605707	-1	0.555343	2.51501	0.66611	0.59999	1.45585	4.13972
403.974	-0.0787979	-1	0.745267	2.34758	0.847205	0.599111	1.58773	4.07469
404.474	-0.0926493	-1	0.944641	2.18205	1.02516	0.596271	1.72123	4.00654
404.974	-0.105287	-1	1.10958	2.15839	1.08396	0.57407	1.80247	3.9784
405.474	-0.113971	-1	1.28126	2.14273	1.13652	0.550483	1.88491	3.94515
405.974	-0.117123	1	1.52167	2.20886	1.12544	0.512742	1.97956	3.85967
406.474	-0.116049	1	1.74786	2.27746	1.12209	0.476568	2.06278	3.77836
406.974	-0.108979	1	1.92089	2.35533	1.14758	0.446245	2.10333	3.71258
407.474	-0.0945465	1	2.07687	2.43185	1.16757	0.415328	2.12623	3.62071
407.974	-0.0768992	1	2.1993	2.50568	1.17671	0.383241	2.11444	3.47756
408.474	-0.0557182	1	2.22945	2.53091	1.18474	0.355942	2.11491	3.33968
408.974	-0.0311729	1	2.13392	2.48993	1.19125	0.335166	2.13208	3.20899
409.474	-0.00659727	1	1.97655	2.37987	1.18469	0.31525	2.12937	3.12444
409.974	0.0180605	1	1.77003	2.2149	1.16774	0.296016	2.11084	3.07656
410.474	0.0418616	1	1.55882	2.06799	1.11731	0.274085	2.11018	3.07366
410.974	0.0612301	1	1.34546	1.92938	1.05147	0.250913	2.11772	3.09144
411.474	0.0791196	1	1.23452	1.88644	0.984883	0.222291	2.07539	3.19134
411.974	0.0945969	1	1.14595	1.86438	0.918126	0.192479	2.02217	3.30916
412.474	0.106493	1	1.09023	1.8788	0.83593	0.158995	2.00471	3.41093
412.974	0.114782	-1	1.03731	1.8953	0.755342	0.125727	1.9887	3.5118
413.474	0.118236	-1	1.00901	1.90723	0.753905	0.106094	1.94998	3.61484
413.974	0.115677	-1	0.984001	1.91709	0.75432	0.0857303	1.90906	3.71129
414.474	0.107418	-1	0.977256	1.91547	0.76502	0.0613073	1.85592	3.77113
414.974	0.094524	-1	0.967619	1.91284	0.775981	0.0396498	1.80683	3.82969
415.474	0.0767045	-1	0.950009	1.90745	0.787659	0.0256153	1.7689	3.88473
415.974	0.0549489	-1	0.929547	1.88623	0.792298	0.0141929	1.72631	3.94152
416.474	0.0318296	-1	0.903418	1.83353	0.782949	0.00796035	1.67446	4.0018
416.974	0.00658268	-1	0.867181	1.76417	0.774111	0.00313524	1.62951	4.06224
417.474	-0.0181704	-1	0.818806	1.67479	0.765885	0	1.59284	4.12289
417.974	-0.0399087	-1	0.810762	1.61221	0.766429	0.00538194	1.54177	4.18688
418.474	-0.0605707	-1	0.832845	1.56963	0.773524	0.0171265	1.47996	4.25337
418.974	-0.0784629	-1	0.84409	1.54832	0.779913	0.0227224	1.43443	4.322
419.474	-0.0929711	-1	0.849611	1.53824	0.785928	0.0250712	1.3975	4.39176
419.974	-0.105653	-1	0.837408	1.5686	0.797694	0.0239703	1.36877	4.44265
420.474	-0.114145	-1	0.820327	1.61009	0.811041	0.0219202	1.3423	4.48836
420.974	-0.116943	-1	0.793614	1.64969	0.806491	0.0128717	1.33201	4.51275
421.474	-0.115782	-1	0.765713	1.68906	0.799733	0.00296001	1.3237	4.53451
421.974	-0.108802	-1	0.758948	1.72671	0.792501	0.00429448	1.30793	4.54252
422.474	-0.094986	-1	0.753263	1.76147	0.785809	0.00718263	1.29245	4.54999
422.974	-0.0779557	-1	0.751535	1.76988	0.784261	0.0212455	1.28176	4.55637
423.474	-0.0567297	-1	0.749063	1.78042	0.783606	0.0327928	1.27222	4.55328
423.974	-0.0319395	-1	0.744103	1.79806	0.785946	0.0359089	1.26656	4.51847
424.474	-0.00769354	-1	0.755689	1.81645	0.78627	0.03788	1.25952	4.4753
424.974	0.0166796	1	0.803124	1.83646	0.782228	0.0373704	1.24945	4.41405
425.474	0.0398915	1	0.826717	1.9024	0.767535	0.0325398	1.24393	4.37071
425.974	0.0595671	1	0.819166	2.02834	0.73893	0.0220647	1.24435	4.35078
426.474	0.0781809	1	0.796261	2.19278	0.717506	0.0343977	1.23318	4.35971
426.974	0.0937655	1	0.76142	2.38715	0.701665	0.0644631	1.21299	4.39109
427.474	0.105419	1	0.701756	2.65049	0.688523	0.106646	1.20335	4.42573
427.974	0.114145	1	0.630454	2.94618	0.676647	0.154511	1.19865	4.4619
428.474	0.118504	1	0.614397	3.17598	0.670138	0.207905	1.17981	4.48594
428.974	0.116162	1	0.612533	3.38884	0.665009	0.26272	1.15734	4.50687
429.474	0.107488	1	0.610799	3.65592	0.655757	0.293474	1.13343	4.5022
429.974	0.0944816	1	0.608006	3.92859	0.646318	0.32084	1.10889	4.49477
430.474	0.0764424	1	0.57361	4.20613	0.643535	0.319306	1.07007	4.48148
430.974	0.0548364	1	0.542244	4.48121	0.638346	0.323567	1.03648	4.46085
431.474	0.0311729	1	0.526882	4.74327	0.620457	0.358435	1.03059	4.40141
431.974	0.00567578	1	0.522007	4.96536	0.606391	0.391426	1.03387	4.34212
432.474	-0.0180658	1	0.548766	5.0669	0.603858	0.418755	1.06481	4.28328
432.974	-0.0401139	1	0.594694	5.14361	0.588119	0.444355	1.1053	4.22762
433.474	-0.0610804	1	0.678434	5.17135	0.546329	0.466545	1.16462	4.17825
433.974	-0.0787105	1	0.940425	5.08258	0.599779	0.470576	1.22275	4.09536
434.474	-0.0934358	1	1.40488	4.86147	0.761404	0.453981	1.27951	3.97439
434.974	-0.105816	1	2.05602	4.64099	0.966679	0.436412	1.34896	3.83903
435.474	-0.114216	1	2.85493	4.42099	1.2065	0.418073	1.42845	3.69228
435.974	-0.117081	1	3.59856	4.15545	1.52119	0.410919	1.51934	3.50903
436.474	-0.115128	1	4.31692	3.86908	1.87011	0.408879	1.61545	3.30909
436.974	-0.107069	-1	4.59389	3.75742	2.07237	0.400679	1.69962	3.14982
437.474	-0.0940593	-1	4.76867	3.68621	2.24067	0.391052	1.78104	2.99996
437.974	-0.0770991	-1	4.55858	3.58096	2.39008	0.390429	1.82962	2.87552
438.474	-0.0551713	-1	4.30083	3.47145	2.53638	0.39066	1.87328	2.75366
438.974	-0.0313927	-1	3.94053	3.35149	2.65118	0.384315	1.87922	2.61891
439.474	-0.00697459	-1	3.58579	3.25558	2.75717	0.380913	1.88022	2.49513
439.974	0.0178579	-1	3.26132	3.29079	2.81512	0.393551	1.85426	2.43114
440.474	0.0405204	-1	2.91891	3.35596	2.83422	0.40571	1.82263	2.38176
440.974	0.0605204	-1	2.53172	3.4959	2.75631	0.416676	1.77681	2.36881
441.474	0.0790971	-1	2.1951	3.66602	2.6193	0.428149	1.72556	2.40323
441.974	0.0938727	-1	1.92893	3.87818	2.39991	0.440328	1.66675	2.50366
442.474	0.106206	-1	1.67722	4.02505	2.17257	0.439445	1.62114	2.5968
442.974	0.114103	-1	1.44032	4.10501	1.93705	0.425171	1.58906	2.68246
443.474	0.117385	-1	1.26066	4.09241	1.75274	0.407106	1.56433	2.75838
443.974	0.115435	-1	1.11519	4.02452	1.59902	0.386776	1.54399	2.82848
444.474	0.108624	-1	1.01773	3.98271	1.52359	0.370522	1.5165	2.87286
444.974	0.0954507	-1	0.9366	3.94979	1.47482	0.355656	1.48656	2.90849
445.474	0.0773916	-1	0.874801	3.97511	1.52943	0.344909	1.45081	2.93863
445.974	0.0557313	-1	0.817	4.01248	1.60542	0.335014	1.41386	2.96763
446.474	0.0318004	-1	0.773635	4.12018	1.65231	0.333845	1.39718	2.97485
446.974	0.00643833	-1	0.730703	4.2297	1.69042	0.332573	1.38311	2.98036
447.474	-0.0171907	-1	0.68034	4.29821	1.61611	0.320902	1.39082	2.98002
447.974	-0.0405721	-1	0.633603	4.36302	1.53465	0.309224	1.39759	2.98129
448.474	-0.0610222	-1	0.61006	4.40421	1.40736	0.297494	1.39833	2.99293
448.974	-0.0783676	-1	0.602422	4.46075	1.27637	0.285671	1.38972	3.00307
449.474	-0.0929261	-1	0.638179	4.55917	1.13529	0.273592	1.35559	3.00909
449.974	-0.105084	-1	0.660688	4.58054	1.03944	0.269693	1.32429	3.06421
450.474	-0.112849	-1	0.661507	4.47578	1.01762	0.279186	1.29761	3.19973
450.974	-0.117425	-1	0.66295	4.34928	1.05805	0.295116	1.27059	3.35058
451.474	-0.116007	-1	0.665103	4.198	1.1694	0.318381	1.2432	3.51891
451.974	-0.107641	-1	0.677211	4.00048	1.29224	0.336636	1.22452	3.72758
452.474	-0.0949887	-1	0.696038	3.77174	1.42282	0.351507	1.21171	3.96349
452.974	-0.0784257	-1	0.717586	3.68023	1.5475	0.357002	1.20911	4.13149
453.474	-0.0564953	-1	0.740262	3.64554	1.66975	0.358614	1.21074	4.27139
453.974	-0.0328239	-1	0.766571	3.59993	1.64306	0.353889	1.22008	4.38979
454.474	-0.00739692	-1	0.793807	3.55154	1.57843	0.34755	1.2314	4.50272
454.974	0.0173985	-1	0.774686	3.55573	1.53274	0.349698	1.23795	4.52804
455.474	0.0387225	-1	0.754565	3.56564	1.48952	0.353314	1.24314	4.54353
455.974	0.0589899	-1	0.774034	3.60481	1.46369	0.37048	1.2321	4.50529
456.474	0.0781385	-1	0.796244	3.64834	1.44049	0.386652	1.22007	4.45404
456.974	0.0929115	-1	0.831987	3.71341	1.43029	0.397916	1.20317	4.33857
457.474	0.105244	-1	0.868442	3.77351	1.42013	0.423324	1.18506	4.22496
457.974	0.113556	-1	0.906725	3.82082	1.4101	0.48503	1.16383	4.11612
458.474	0.116988	-1	1.01875	3.85856	1.41757	0.584122	1.1404	4.00558
458.974	0.116264	1	1.25285	3.88045	1.45399	0.745101	1.1133	3.89222
459.474	0.110008	1	1.62331	3.81176	1.56357	1.00494	1.08315	3.82182
459.974	0.0959671	1	2.12489	3.65596	1.74349	1.35983	1.05005	3.79272
460.474	0.0777982	1	2.57135	3.48099	1.97278	1.71165	1.02011	3.7253
460.974	0.056547	1	2.98259	3.29379	2.23361	2.06152	0.992181	3.63341
461.474	0.0321315	1	3.22946	3.03012	2.50023	2.41249	0.959651	3.51345
461.974	0.00725134	1	3.40781	2.73459	2.76925	2.76391	0.925205	3.3818
462.474	-0.0175137	1	3.45795	2.56564	2.99252	3.01051	0.8888	3.19527
462.974	-0.0417596	1	3.48138	2.42306	3.20626	3.23528	0.851988	2.99731
463.474	-0.0615849	1	3.74002	2.295	3.41745	3.50232	0.810295	2.83501
463.974	-0.0786456	1	4.00965	2.16922	3.62725	3.76809	0.768572	2.67513
464.474	-0.0942302	1	4.27322	2.08173	3.80654	3.95488	0.731736	2.53258
464.974	-0.106408	1	4.51373	1.99614	3.9843	4.14342	0.695208	2.3934
465.474	-0.11465	1	4.61654	1.92193	4.15297	4.34248	0.660519	2.27436
465.974	-0.118459	1	4.64337	1.84764	4.29409	4.50583	0.628521	2.15627
466.474	-0.116069	1	4.4723	1.77315	4.36345	4.57619	0.603529	2.04062
466.974	-0.108103	1	4.30476	1.70726	4.4488	4.66632	0.573063	1.93359
467.474	-0.0957553	1	4.14336	1.65628	4.56196	4.79076	0.533089	1.84152
467.974	-0.077017	1	3.98367	1.60546	4.65586	4.8933	0.493259	1.74025
468.474	-0.0544948	1	3.82575	1.5548	4.72994	4.9733	0.453575	1.62952
468.974	-0.0308287	-1	3.69034	1.50973	4.83442	5.08058	0.412555	1.54393
469.474	-0.00533415	-1	3.57089	1.4686	4.96042	5.20719	0.370587	1.47615
469.974	0.0187993	-1	3.45648	1.44215	5.04357	5.30856	0.341179	1.3938
470.474	0.0408475	-1	3.34452	1.42283	5.10586	5.39764	0.317885	1.30435
470.974	0.0618815	-1	3.2596	1.40794	5.17614	5.50009	0.299684	1.24988
471.474	0.0793593	-1	3.18129	1.39414	5.24839	5.60581	0.282732	1.20398
471.974	0.0934729	-1	3.18457	1.37955	5.29066	5.61157	0.275269	1.14779
472.474	0.105918	-1	3.19205	1.36452	5.33119	5.61033	0.268433	1.09115
472.974	0.114275	-1	3.13189	1.32555	5.38516	5.5791	0.262118	1.04771
473.474	0.117887	-1	3.07976	1.28382	5.4366	5.53959	0.255113	1.00158
473.974	0.116469	-1	3.07526	1.22581	5.47313	5.45104	0.244013	0.939487
474.474	0.108939	-1	3.08678	1.16916	5.51943	5.39268	0.230862	0.880302
474.974	0.0948165	-1	3.14032	1.11608	5.5914	5.41351	0.21233	0.828737
475.474	0.0782258	-1	3.27766	1.0592	5.64141	5.42858	0.195989	0.776999
475.974	0.0569124	-1	3.53641	0.996814	5.65963	5.43534	0.182825	0.72501
476.474	0.0329338	-1	3.76824	0.93886	5.66899	5.42943	0.175265	0.679948
476.974	0.00816615	-1	3.97734	0.884653	5.67086	5.41282	0.172443	0.640739
477.474	-0.0162096	-1	4.11658	0.822458	5.62948	5.38054	0.173059	0.601395
477.974	-0.0392441	-1	4.22202	0.756395	5.56717	5.34067	0.17534	0.561984
478.474	-0.058128	-1	4.25772	0.697875	5.52971	5.33801	0.172281	0.533284
478.974	-0.0766994	-1	4.27655	0.641179	5.49828	5.34435	0.167931	0.507174
479.474	-0.0920469	-1	4.25223	0.600895	5.47861	5.37456	0.160754	0.476522
479.974	-0.104707	-1	4.2209	0.562798	5.46032	5.4072	0.153312	0.4454
480.474	-0.113354	-1	4.07982	0.537307	5.43954	5.41317	0.150454	0.419071
480.974	-0.117949	-1	3.92046	0.51433	5.41836	5.41676	0.146551	0.393872
481.474	-0.115869	-1	3.65436	0.506033	5.39484	5.40642	0.136549	0.375271
481.974	-0.109214	-1	3.37571	0.496921	5.3592	5.39887	0.127384	0.356537
482.474	-0.0972858	-1	3.05359	0.484989	5.28162	5.40097	0.121117	0.337338
482.974	-0.0797537	-1	2.7684	0.477401	5.18984	5.39768	0.113177	0.321467
483.474	-0.0580656	-1	2.5557	0.478333	5.07017	5.38383	0.101955	0.312124
483.974	-0.0342022	-1	2.3941	0.477622	4.939	5.35136	0.0976847	0.29941
484.474	-0.0082284	-1	2.28918	0.475088	4.79508	5.29825	0.101122	0.282959
484.974	0.0159924	-1	2.21469	0.479647	4.67678	5.25244	0.096925	0.274694
485.474	0.0384974	-1	2.16394	0.489739	4.57846	5.21234	0.0867726	0.272813
485.974	0.0595341	1	2.13869	0.483238	4.50882	5.20411	0.0779109	0.267287
486.474	0.0775388	1	2.12471	0.469407	4.45185	5.20995	0.0696194	0.260152
486.974	0.0923766	1	2.12201	0.468347	4.38337	5.22545	0.055352	0.250958
487.474	0.104999	1	2.12193	0.470246	4.31222	5.24318	0.0396991	0.241286
487.974	0.113269	1	2.2117	0.452687	4.23971	5.21185	0.0373561	0.230551
488.474	0.116568	1	2.32102	0.435091	4.16985	5.17829	0.0356699	0.220013
488.974	0.115869	1	2.64028	0.436197	4.14213	5.1593	0.0308538	0.213527
489.474	0.108585	1	2.97487	0.43537	4.11877	5.13468	0.0265564	0.207743
489.974	0.0953581	1	3.40263	0.422795	4.12197	5.07581	0.0254143	0.206236
490.474	0.0781556	1	3.80114	0.414668	4.13633	5.01836	0.0232588	0.204191
490.974	0.0564	1	4.12016	0.418629	4.18103	4.96476	0.018349	0.200684
491.474	0.0316324	1	4.3264	0.418662	4.21989	4.89271	0.0149119	0.194336
491.974	0.00736914	1	4.36557	0.412873	4.25011	4.79333	0.0136564	0.183781
492.474	-0.0177282	1	4.31824	0.399232	4.2748	4.70898	0.0142454	0.177797
492.974	-0.0401987	1	4.17824	0.37718	4.29357	4.64073	0.0168104	0.17671
493.474	-0.0597565	1	3.94557	0.34794	4.27548	4.58618	0.0163842	0.176445
493.974	-0.0782233	1	3.65246	0.31401	4.23334	4.54057	0.0140067	0.176717
494.474	-0.0932809	1	3.37251	0.28175	4.15422	4.48552	0.0149938	0.178083
494.974	-0.104844	1	3.09741	0.250105	4.06148	4.427	0.0172216	0.179851
495.474	-0.113991	1	2.78596	0.218631	3.92692	4.375	0.0173986	0.178889
495.974	-0.117867	1	2.46792	0.187188	3.78477	4.32417	0.0172034	0.177431
496.474	-0.116247	1	2.27594	0.156031	3.59283	4.27025	0.026153	0.179011
496.974	-0.108785	1	2.08727	0.126974	3.39864	4.21555	0.0353417	0.178937
497.474	-0.0954335	1	1.90241	0.129159	3.18888	4.15033	0.0448002	0.153096
497.974	-0.0775465	1	1.73528	0.13311	2.99219	4.08316	0.0539865	0.12719
498.474	-0.0560531	1	1.64263	0.144485	2.85038	4.00774	0.0620292	0.101011
498.974	-0.0314827	1	1.56084	0.158874	2.72055	3.92391	0.0691709	0.0741101
499.474	-0.00616299	1	1.50364	0.180087	2.61781	3.82102	0.0742735	0.045574
499.974	0.0176382	1	1.44985	0.19189	2.53022	3.72775	0.0784734	0.0293342
500.474	0.04078	1	1.40153	0.188623	2.4669	3.64988	0.081228	0.0327863
500.974	0.0619543	1	1.34279	0.180412	2.40858	3.55791	0.0859629	0.0364263
501.474	0.0798915	1	1.27444	0.167643	2.35488	3.45293	0.0925245	0.0402397
501.974	0.0954959	1	1.22745	0.146449	2.32072	3.34809	0.0978599	0.0445322
502.474	0.107586	1	1.19227	0.120595	2.29738	3.24333	0.102517	0.0490899
502.974	0.115681	1	1.18612	0.0998347	2.27907	3.12908	0.105308	0.0473899
503.474	0.119098	1	1.19059	0.0809419	2.2626	3.01135	0.107415	0.0433966
503.974	0.116477	1	1.34837	0.0954396	2.3003	2.93235	0.0959772	0.0320762
504.474	0.107736	1	1.53086	0.115319	2.34672	2.85959	0.0823559	0.0195749
504.974	0.0937203	1	1.73361	0.189279	2.49717	2.76559	0.0691415	0.00939752
505.474	0.0763378	1	1.94053	0.262278	2.66052	2.67073	0.0583117	0.000289844
505.974	0.054365	1	2.17937	0.315325	2.91396	2.57299	0.0681614	0
506.474	0.0305612	1	2.3746	0.365	3.17272	2.47482	0.0842562	0.00239979
506.974	0.00579358	1	2.4253	0.403504	3.44913	2.37526	0.121048	0.0137132
507.474	-0.0194017	1	2.46305	0.433268	3.71746	2.28201	0.161459	0.02348
507.974	-0.0418245	1	2.45628	0.43296	3.95803	2.21051	0.214321	0.0279254
508.474	-0.0617199	1	2.40388	0.433863	4.15598	2.14367	0.26258	0.0322909
508.974	-0.0805111	1	2.25951	0.437206	4.26805	2.08621	0.301562	0.036495
509.474	-0.0951318	1	2.11473	0.43189	4.35262	2.03072	0.337781	0.0421565
509.974	-0.107265	1	1.96937	0.414258	4.39808	1.97802	0.370069	0.049891
510.474	-0.11525	1	1.83427	0.387016	4.40795	1.93436	0.403994	0.0578985
510.974	-0.11798	1	1.70764	0.351822	4.38838	1.89818	0.439275	0.0661319
511.474	-0.115677	1	1.59993	0.320395	4.38933	1.87563	0.463012	0.0722405
511.974	-0.108689	1	1.50157	0.290831	4.40044	1.85984	0.481038	0.0772978
512.474	-0.0946762	1	1.43018	0.269181	4.37894	1.82954	0.50701	0.0716828
512.974	-0.0765245	1	1.3662	0.249702	4.34849	1.79528	0.535163	0.0631379
513.474	-0.0557129	1	1.30236	0.238207	4.34605	1.77275	0.553749	0.0641056
513.974	-0.0313623	1	1.23852	0.227397	4.34601	1.75123	0.571515	0.0658894
514.474	-0.00621732	1	1.23677	0.231343	4.32684	1.71356	0.612468	0.0688017
514.974	0.0179161	1	1.23408	0.234335	4.30601	1.67728	0.652664	0.0725695
515.474	0.041892	1	1.22351	0.2303	4.27389	1.65114	0.687039	0.0823344
515.974	0.0616352	1	1.22091	0.227006	4.2216	1.6175	0.719922	0.0907306
516.474	0.0787582	1	1.24273	0.225985	4.10744	1.56082	0.748228	0.094927
516.974	0.0946048	1	1.25784	0.220785	3.97165	1.50511	0.772211	0.0980605
517.474	0.106628	1	1.25949	0.207223	3.79257	1.45133	0.787543	0.0990669
517.974	0.115047	1	1.27395	0.19042	3.59098	1.39309	0.801884	0.0992277
518.474	0.118721	1	1.30354	0.169786	3.36279	1.32956	0.815052	0.0983894
518.974	0.116619	1	1.35136	0.147455	3.16296	1.27223	0.822212	0.0972725
519.474	0.108472	1	1.41314	0.123826	2.98484	1.21964	0.824772	0.0959424
519.974	0.0955553	1	1.53934	0.0996037	2.83747	1.1612	0.813658	0.0981399
520.474	0.0776684	1	1.70113	0.0750533	2.70709	1.09952	0.794991	0.102286
520.974	0.0556056	1	1.8743	0.0579305	2.60871	1.04597	0.755067	0.10981
521.474	0.0311478	1	2.05073	0.042932	2.51948	0.994742	0.709063	0.1183
521.974	0.00587569	1	2.16416	0.0290536	2.44855	0.948539	0.667602	0.120524
522.474	-0.0191766	1	2.26964	0.0153164	2.37992	0.902971	0.626713	0.121959
522.974	-0.0407654	1	2.22885	0.010306	2.34853	0.868648	0.576557	0.122456
523.474	-0.0610977	1	2.17416	0.00547699	2.32514	0.83497	0.52797	0.122526
523.974	-0.0789224	1	2.03228	0	2.36412	0.804176	0.495957	0.11899
524.474	-0.0936702	1	1.8942	0.000541338	2.40661	0.778421	0.462946	0.116511
524.974	-0.105738	1	1.77063	0.0240823	2.46252	0.771924	0.426121	0.118069
525.474	-0.114862	1	1.66067	0.0524335	2.53271	0.769673	0.404258	0.118233
525.974	-0.117952	1	1.58338	0.0923466	2.63726	0.777626	0.418359	0.115049
526.474	-0.116247	1	1.52393	0.138088	2.75246	0.790393	0.437117	0.113174
526.974	-0.109086	1	1.48894	0.191817	2.88225	0.809758	0.462256	0.113096
527.474	-0.095558	1	1.47672	0.23811	3.01418	0.822119	0.49771	0.112913
527.974	-0.0775439	1	1.48287	0.278404	3.14785	0.828833	0.541481	0.112644
528.474	-0.0562556	1	1.48061	0.303425	3.28004	0.831255	0.605885	0.116562
528.974	-0.0308789	1	1.47452	0.32148	3.41156	0.831719	0.679699	0.122389
529.474	-0.00615367	1	1.43485	0.280443	3.43377	0.811166	0.755292	0.133933
529.974	0.0179175	1	1.38697	0.224946	3.42922	0.785469	0.831321	0.146875
530.474	0.0410792	1	1.32558	0.236547	3.37262	0.737714	0.899311	0.159885
530.974	0.0604476	1	1.26261	0.256224	3.30957	0.687326	0.966096	0.172901
531.474	0.0778129	1	1.21268	0.276304	3.19532	0.642583	0.967316	0.184906
531.974	0.0933127	1	1.17119	0.304917	3.09374	0.599546	0.968877	0.195583
532.474	0.104859	1	1.20008	0.404751	3.09798	0.570732	0.973285	0.195168
532.974	0.113329	1	1.23183	0.488286	3.12061	0.546581	0.98263	0.195089
533.474	0.117048	1	1.2739	0.513013	3.20959	0.539248	1.00979	0.196222
533.974	0.11506	1	1.34468	0.539339	3.30941	0.52816	1.04329	0.197474
534.474	0.107643	1	1.47052	0.568737	3.43006	0.509868	1.08896	0.198955
534.974	0.0953435	1	1.60867	0.595734	3.53841	0.492589	1.12691	0.202594
535.474	0.0777213	1	1.76085	0.619996	3.63275	0.476466	1.15606	0.208694
535.974	0.0565853	1	1.8765	0.630877	3.7062	0.460526	1.17655	0.216496
536.474	0.0331112	1	1.96283	0.631012	3.76288	0.444734	1.1901	0.225665
536.974	0.00816879	1	1.97647	0.572831	3.806	0.435021	1.20673	0.23402
537.474	-0.01586	1	1.95657	0.487733	3.84285	0.428113	1.22478	0.241999
537.974	-0.0377785	1	1.86043	0.41509	3.82376	0.419257	1.24544	0.24782
538.474	-0.0584855	1	1.74715	0.345247	3.79207	0.409962	1.26669	0.253156
538.974	-0.0763327	1	1.67909	0.296387	3.72074	0.407021	1.26716	0.254221
539.474	-0.0915028	1	1.61204	0.254326	3.64576	0.404408	1.26512	0.255253
539.974	-0.10401	1	1.52459	0.283735	3.55318	0.401346	1.24621	0.259001
540.474	-0.112807	1	1.4401	0.315572	3.47549	0.400851	1.22859	0.262227
540.974	-0.116396	1	1.37184	0.360686	3.47924	0.414387	1.21806	0.262605
541.474	-0.11541	1	1.30384	0.406148	3.49777	0.427584	1.20932	0.26396
541.974	-0.10841	1	1.2371	0.453222	3.58459	0.439214	1.20885	0.269823
542.474	-0.0955381	1	1.1924	0.502692	3.6858	0.450822	1.21278	0.275175
542.974	-0.079232	1	1.19821	0.557655	3.81997	0.462382	1.22677	0.279358
543.474	-0.0582006	1	1.21941	0.594629	3.93769	0.468724	1.24188	0.282311
543.974	-0.03385	1	1.26042	0.608466	4.03425	0.468356	1.25843	0.283681
544.474	-0.00951666	1	1.30256	0.612213	4.12046	0.471908	1.29161	0.270751
544.974	0.0153609	1	1.34562	0.607757	4.19824	0.478647	1.33832	0.246196
545.474	0.0384457	1	1.33645	0.608262	4.2753	0.478072	1.38412	0.216547
545.974	0.0580763	1	1.30289	0.611082	4.35203	0.474083	1.42951	0.184521
546.474	0.0769324	1	1.27015	0.623368	4.39851	0.472634	1.46545	0.158846
546.974	0.092362	1	1.23764	0.638333	4.43644	0.471903	1.49873	0.134969
547.474	0.103971	1	1.19733	0.64961	4.3666	0.472732	1.49964	0.130653
547.974	0.11261	1	1.15815	0.659403	4.28107	0.473786	1.49769	0.128546
548.474	0.116421	1	1.16817	0.640465	4.0685	0.476611	1.50533	0.132995
548.974	0.114429	1	1.19996	0.619851	3.85658	0.478475	1.51096	0.137799
549.474	0.107468	1	1.39335	0.586806	3.64945	0.473216	1.50163	0.145229
549.974	0.0945517	1	1.62658	0.547835	3.46129	0.465469	1.49273	0.152284
550.474	0.0769071	1	1.98809	0.489783	3.33421	0.449711	1.48519	0.158127
550.974	0.0558532	1	2.35825	0.448689	3.24135	0.445243	1.46813	0.162594
551.474	0.0313781	1	2.74441	0.438949	3.21179	0.461648	1.43348	0.164517
551.974	0.00627288	1	3.01202	0.415998	3.19074	0.477117	1.41465	0.164321
552.474	-0.0173111	1	3.12172	0.375449	3.18103	0.491338	1.41688	0.161302
552.974	-0.040061	1	3.15319	0.34947	3.16676	0.495389	1.42165	0.153871
553.474	-0.0606555	1	3.12394	0.334798	3.14894	0.491547	1.42838	0.143016
553.974	-0.0778235	1	3.06151	0.304629	3.19855	0.472229	1.42398	0.132878
554.474	-0.0925064	1	2.98339	0.267133	3.28004	0.445596	1.41431	0.123078
554.974	-0.103965	1	2.93733	0.273149	3.30918	0.438046	1.37141	0.118624
555.474	-0.112494	1	2.90081	0.292104	3.32275	0.436169	1.31862	0.115759
555.974	-0.116086	1	2.78937	0.308973	3.48347	0.468886	1.27737	0.137828
556.474	-0.113984	1	2.66793	0.32525	3.65953	0.505256	1.23842	0.162706
556.974	-0.106584	1	2.44061	0.320247	3.79124	0.534001	1.2597	0.192467
557.474	-0.093907	1	2.21682	0.311125	3.93373	0.559197	1.28575	0.221298
557.974	-0.0771017	1	2.01272	0.27903	4.13628	0.564598	1.33832	0.244936
558.474	-0.0555262	1	1.8126	0.253672	4.30287	0.566659	1.39156	0.263789
558.974	-0.0315979	1	1.62258	0.245453	4.37802	0.560222	1.44649	0.270469
559.474	-0.00654558	1	1.47847	0.242083	4.44503	0.5474	1.48961	0.275359
559.974	0.0182022	1	1.39933	0.245575	4.50056	0.525537	1.51604	0.277716
560.474	0.0407747	1	1.35221	0.258816	4.5987	0.511016	1.52509	0.275661
560.974	0.06058	1	1.3319	0.280225	4.73255	0.502644	1.51959	0.26991
561.474	0.0788496	1	1.35868	0.296088	4.90158	0.4904	1.52879	0.269504
561.974	0.0937999	1	1.41215	0.308807	5.09055	0.47596	1.5463	0.272128
562.474	0.105916	1	1.46735	0.347723	5.31209	0.493315	1.56669	0.277061
562.974	0.113331	1	1.52306	0.394481	5.54339	0.520188	1.58793	0.282684
563.474	0.116811	1	1.52635	0.389774	5.69679	0.52106	1.61182	0.295337
563.974	0.115387	1	1.52112	0.376689	5.83751	0.517698	1.63615	0.309135
564.474	0.108732	1	1.58568	0.354065	5.89235	0.504908	1.63529	0.316909
564.974	0.0950284	1	1.67397	0.328767	5.93292	0.488637	1.63162	0.324352
565.474	0.0774062	1	1.98251	0.279623	5.86644	0.439587	1.61167	0.331666
565.974	0.0559181	1	2.30243	0.248517	5.78686	0.396846	1.59878	0.339256
566.474	0.0316549	1	2.66419	0.283665	5.65914	0.377277	1.61182	0.347858
566.974	0.0068647	1	2.99821	0.318076	5.52409	0.36489	1.61932	0.355331
567.474	-0.0162149	1	3.26494	0.350697	5.37128	0.369933	1.61337	0.360063
567.974	-0.0399286	1	3.39741	0.377837	5.19724	0.380732	1.61482	0.361574
568.474	-0.0599815	1	3.34855	0.397572	4.99455	0.399307	1.62626	0.358733
568.974	-0.0777414	1	3.21208	0.388654	4.8214	0.418639	1.63194	0.353003
569.474	-0.0925169	1	2.99958	0.35487	4.67388	0.438629	1.63262	0.344764
569.974	-0.104168	1	2.73566	0.32283	4.5462	0.449486	1.63353	0.337391
570.474	-0.112942	1	2.43989	0.291869	4.43081	0.454682	1.63456	0.330554
570.974	-0.11745	1	2.16479	0.271328	4.37544	0.466324	1.61805	0.325082
571.474	-0.115435	1	1.89669	0.254317	4.34039	0.480149	1.59558	0.320074
571.974	-0.107398	1	1.72558	0.225483	4.32948	0.473887	1.54619	0.313942
572.474	-0.0943717	1	1.57337	0.194347	4.32329	0.463714	1.49154	0.307591
572.974	-0.0766423	1	1.40624	0.221482	4.35309	0.460138	1.49207	0.303175
573.474	-0.0553686	1	1.24178	0.252023	4.38561	0.455791	1.49837	0.297347
573.974	-0.0323142	1	1.11795	0.285626	4.42709	0.438307	1.53727	0.273839
574.474	-0.00750154	1	0.995018	0.322974	4.46974	0.427498	1.58323	0.252131
574.974	0.0173138	1	0.875475	0.374289	4.51674	0.441589	1.65554	0.237142
575.474	0.0391872	1	0.788599	0.424499	4.54237	0.453507	1.71354	0.220116
575.974	0.0591924	1	0.766801	0.472508	4.52543	0.461096	1.74305	0.199033
576.474	0.0770674	1	0.750606	0.521156	4.52703	0.47111	1.76816	0.187659
576.974	0.0922548	1	0.741473	0.570612	4.55202	0.484183	1.78773	0.188521
577.474	0.105025	1	0.743465	0.588491	4.58702	0.49029	1.80614	0.18845
577.974	0.113576	1	0.759399	0.566797	4.63457	0.48767	1.82309	0.18721
578.474	0.116706	1	0.782404	0.52113	4.70488	0.486322	1.83548	0.187147
578.974	0.11522	1	0.811009	0.456476	4.79321	0.485982	1.84425	0.188015
579.474	0.10826	1	0.840309	0.38433	4.87009	0.488286	1.84046	0.188855
579.974	0.0946365	1	0.869915	0.308881	4.94191	0.491756	1.83113	0.189683
580.474	0.0763153	1	0.909469	0.301847	5.01537	0.49541	1.81501	0.188416
580.974	0.0550919	1	0.951086	0.309004	5.08917	0.499102	1.79748	0.186714
581.474	0.0304367	1	0.991565	0.31242	5.1803	0.499473	1.82988	0.198263
581.974	0.00584387	1	1.02997	0.315196	5.26839	0.498964	1.86612	0.210841
582.474	-0.0185146	1	1.03393	0.31276	5.2759	0.488374	1.89003	0.220258
582.974	-0.041949	1	1.03255	0.309558	5.26316	0.47753	1.91244	0.229815
583.474	-0.0617742	1	1.00718	0.302901	5.15928	0.465544	1.92812	0.239996
583.974	-0.0785702	1	0.970173	0.297557	5.05069	0.454971	1.93343	0.248072
584.474	-0.0937403	1	0.904049	0.2955	4.93035	0.447931	1.91283	0.250883
584.974	-0.105504	1	0.848719	0.295601	4.81166	0.445779	1.89515	0.254676
585.474	-0.113931	1	0.808443	0.298712	4.69527	0.450443	1.88154	0.259838
585.974	-0.11756	1	0.761744	0.303778	4.57655	0.457098	1.88175	0.264904
586.474	-0.115587	1	0.708865	0.310727	4.45558	0.46567	1.89525	0.269879
586.974	-0.107314	1	0.669601	0.310529	4.31993	0.467631	1.89722	0.269431
587.474	-0.0947318	1	0.638001	0.306308	4.176	0.465871	1.8927	0.265931
587.974	-0.0772645	1	0.613149	0.30648	4.05009	0.456572	2.00721	0.264463
588.474	-0.0552097	1	0.590461	0.30806	3.92996	0.444854	2.1599	0.263647
588.974	-0.0315158	1	0.582005	0.310029	3.83624	0.441379	2.33406	0.26708
589.474	-0.00589152	1	0.576353	0.312074	3.74773	0.439528	2.51246	0.27135
589.974	0.0183545	1	0.585131	0.332817	3.75316	0.457993	2.66377	0.280629
590.474	0.0396334	1	0.597089	0.35344	3.76147	0.475019	2.80228	0.289197
590.974	0.060388	1	0.641377	0.363816	3.76101	0.464805	2.79611	0.286678
591.474	0.0787	1	0.681024	0.375575	3.79922	0.453304	2.79041	0.282235
591.974	0.0933934	1	0.697484	0.394239	4.03053	0.435376	2.78702	0.268188
592.474	0.106033	1	0.719268	0.402914	4.24655	0.413556	2.77539	0.254377
592.974	0.114435	1	0.754034	0.387227	4.42523	0.382247	2.74367	0.24114
593.474	0.117915	1	0.750784	0.395579	4.59555	0.381478	2.77514	0.232615
593.974	0.117004	1	0.688818	0.441059	4.75296	0.42788	2.90419	0.23137
594.474	0.109649	1	0.633194	0.5018	4.76186	0.460858	3.02203	0.250197
594.974	0.100308	1	0.584581	0.579409	4.60663	0.478999	3.12748	0.291207
595.474	0.0859719	1	0.528932	0.679072	4.37579	0.48563	3.19194	0.361005
595.974	0.0618534	1	0.468673	0.793181	4.09542	0.484722	3.22957	0.449661
596.474	0.0436158	1	0.457466	0.837771	3.87199	0.447361	3.12505	0.594586
596.974	0.0211109	1	0.465849	0.854596	3.67128	0.395441	2.96375	0.761984
597.474	-0.00552033	1	0.465234	0.810824	3.52805	0.376729	2.68742	0.976215
597.974	-0.0356251	1	0.462376	0.751942	3.39915	0.366298	2.38239	1.20213
598.474	-0.0673326	1	0.405027	0.768126	3.34985	0.403569	2.05418	1.47582
598.974	-0.14984	1	0.341498	0.797457	3.30575	0.447017	1.71931	1.75418
599.474		1	0.249207	0.951885	3.233	0.529788	1.29764	2.04371

## Sheet: Fig 2FG
animal #1										animal #2										animal #3										animal #4										animal #5
Time (s)	Change in temperature (Celsius/s)	Motor state (Run=1, Rerversal=-1)	AIY activity (dR/R0)	AVA	RME	SMDD	SMDV	RIM		Time (s)	Change in temperature (Celsius/s)	Motor state (Run=1, Rerversal=-1)	AIY activity (dR/R0)	AVA	RME	SMDD	SMDV	RIM		Time (s)	Change in temperature (Celsius/s)	Motor state (Run=1, Rerversal=-1)	AIY activity (dR/R0)	AVA	RME	SMDD	SMDV	RIM		Time (s)	Change in temperature (Celsius/s)	Motor state (Run=1, Rerversal=-1)	AIY activity (dR/R0)	AVA	RME	SMDD	SMDV	RIM		Time (s)	Change in temperature (Celsius/s)	Motor state (Run=1, Rerversal=-1)	AIY activity (dR/R0)	AVA	RME	SMDD	SMDV	RIM
0.9744	-0.152388	-1	0.911491	0.656103	0.496331	0.369528	0.80869	0.0916062		0.977	0	-1	0.203864	0.572402	2.92097	0.649045	5.47614	10.321		0.9636	0.00713207	-1	0.298213	0.299321	2.86983	0.980924	4.55818	8.72583		0.9765	-0.111575	1	0.497604	0.43554	NaN	1.8873	NaN	2.36514		0.9663	0	-1	0.0092022	3.11999	0.13684	1.41988	1.0162	0.60359
1.4744	-0.140857	-1	0.764199	0.649592	0.585444	0.359395	0.824118	0.0969581		1.477	-1.18424e-15	-1	0.183773	0.509415	3.09265	0.668808	5.81025	10.6096		1.4636	0.00482086	-1	0.276863	0.285077	2.82372	0.983288	4.59606	8.8494		1.4765	-0.0557551	1	0.581344	0.350725	NaN	1.81513	NaN	2.37088		1.4663	0	-1	0.000100881	2.97465	0.175199	1.19788	1.01699	0.60124
1.9744	-0.132526	-1	0.653525	0.674655	0.671738	0.371697	0.835251	0.0997885		1.977	-7.10543e-16	-1	0.178683	0.450968	3.0908	0.689348	6.11744	10.8141		1.9636	0.00354969	-1	0.267016	0.285099	2.80817	0.976316	4.61373	8.91749		1.9765	-0.0248744	1	0.642394	0.283189	NaN	1.75427	NaN	2.38306		1.9663	0	-1	-0.0226681	2.84171	0.251883	1.02758	1.02133	0.579171
2.4744	-0.121376	-1	0.573253	0.720846	0.752453	0.398739	0.84342	0.100909		2.477	-5.07531e-16	-1	0.185611	0.397593	2.95331	0.711737	6.39325	10.9395		2.4636	0.0021961	-1	0.262935	0.295464	2.81148	0.962798	4.6136	8.94749		2.4765	0.0110275	1	0.684443	0.230574	NaN	1.70451	NaN	2.3996		2.4663	0	-1	-0.0411138	2.75731	0.386344	0.932151	1.0241	0.551438
2.9744	-0.104442	-1	0.517166	0.777716	0.824827	0.43283	0.849957	0.101131		2.977	0	-1	0.201576	0.34982	2.71808	0.737049	6.63326	10.9906		2.9636	0.00130085	-1	0.258885	0.312251	2.82196	0.945524	4.59809	8.95679		2.9765	0.0416267	1	0.711181	0.190523	NaN	1.6656	NaN	2.41842		2.9663	0	-1	-0.0588783	2.68281	0.541869	0.858848	1.02055	0.526018
3.4744	-0.0808199	-1	0.479048	0.834816	0.886099	0.466275	0.856191	0.101267		3.477	-3.22974e-16	-1	0.223592	0.308181	2.423	0.766358	6.833	10.9725		3.4636	0.000780874	-1	0.249126	0.331537	2.82791	0.927284	4.5696	8.9628		3.4765	0.0636589	1	0.726296	0.160679	NaN	1.63733	NaN	2.43742		3.4663	0	-1	-0.0789986	2.59213	0.720261	0.791696	0.990331	0.518242
3.9744	-0.0531796	-1	0.452683	0.881699	0.933509	0.491382	0.863455	0.102128		3.977	-2.73286e-16	-1	0.248678	0.273207	2.10597	0.800738	6.98804	10.8901		3.9636	0.000615352	-1	0.227922	0.3494	2.81765	0.910867	4.53054	8.98291		3.9765	0.0758409	1	0.733477	0.138684	NaN	1.61945	NaN	2.45452		3.9663	0	-1	-0.0837684	2.52875	0.829904	0.741638	0.962625	0.522003
4.4744	-0.0299835	-1	0.431855	0.907917	0.964294	0.500457	0.873078	0.104525		4.477	0	-1	0.273851	0.245429	1.80489	0.84126	7.09393	10.7482		4.4636	6.67306e-05	-1	0.189537	0.36192	2.77947	0.899064	4.48332	9.03451		4.4765	0.0934651	1	0.736414	0.122183	NaN	1.61174	NaN	2.46764		4.4663	0	-1	-0.0772849	2.4854	0.889149	0.704113	0.936761	0.534222
4.9744	-0.00641098	-1	0.410347	0.903022	0.975694	0.485808	0.886391	0.109271		4.977	0	-1	0.296127	0.225377	1.55765	0.888999	7.14622	10.5519		4.9636	-0.000304104	-1	0.128231	0.365172	2.70168	0.894663	4.43035	9.13501		4.9765	0.10552	1	0.738796	0.108816	NaN	1.61397	NaN	2.47468		4.9663	0	-1	-0.0631272	2.43889	0.943697	0.663056	0.910922	0.545581
5.4744	0.0162255	-1	0.421566	1.05332	1.04744	0.53686	0.923454	0.103564		5.477	0	-1	0.193006	0.226734	1.60094	0.531868	6.98628	9.79932		5.4636	-0.000497153	-1	0.108989	0.39471	2.73509	0.868338	4.39169	9.06429		5.4765	0.112017	1	0.643469	0.0791172	NaN	2.06107	NaN	2.47384		5.4663	0	-1	0.0552232	2.34957	0.934483	0.574046	0.885428	0.545275
5.9744	0.0385695	-1	0.4187	0.975424	1.12418	0.528401	0.956458	0.100667		5.977	0	-1	0.27922	0.191676	1.5251	0.88227	7.08212	10.263		5.9636	-0.000690202	-1	0.0822462	0.392303	2.68062	0.852204	4.3206	9.07767		5.9765	0.117499	1	0.776929	0.0730258	NaN	1.67547	NaN	2.43679		5.9663	0	1	0.19612	2.25661	0.903383	0.494323	0.876606	0.563495
6.4744	0.0590101	-1	0.442021	1.00021	1.19533	0.535532	1.01396	0.100339		6.477	0	-1	0.329825	0.167754	1.43209	1.11005	7.12706	10.6541		6.4636	-0.000749912	-1	0.0623486	0.395056	2.6391	0.842685	4.28171	9.04284		6.4765	0.117007	1	0.861431	0.0598969	NaN	1.47611	NaN	2.41886		6.4663	0	1	0.364351	2.15924	0.84575	0.425859	0.887996	0.604177
6.9744	0.0771611	-1	0.485118	1.11729	1.26288	0.55365	1.08513	0.101873		6.977	2.73286e-16	-1	0.353661	0.152815	1.33263	1.24156	7.13478	10.9695		6.9636	-0.000676282	-1	0.0485738	0.401337	2.60768	0.838839	4.26648	8.97546		6.9765	0.110431	1	0.904734	0.0409224	NaN	1.42832	NaN	2.41447		6.9663	0	1	0.506356	2.05781	0.787293	0.372863	0.920194	0.656992
7.4744	0.0929178	-1	0.54158	1.31631	1.32883	0.578151	1.15917	0.104562		7.477	2.73286e-16	-1	0.359568	0.144705	1.23741	1.30319	7.11899	11.2063		7.4636	-0.000567163	-1	0.0401998	0.409515	2.58352	0.839723	4.26636	8.89115		7.4765	0.0985748	1	0.914593	0.0172939	NaN	1.49743	NaN	2.41802		7.4663	0	1	0.620679	1.95897	0.733644	0.33065	0.96011	0.718014
7.9744	0.105143	1	0.604994	1.58688	1.39519	0.604433	1.22524	0.1077		7.977	0	-1	0.356386	0.141271	1.15712	1.3213	7.09339	11.3614		7.9636	-0.000430466	-1	0.0365041	0.417958	2.56376	0.844394	4.27282	8.80557		7.9765	0.082097	1	0.898768	-0.00979684	NaN	1.64879	NaN	2.42392		7.9663	0	1	0.647618	1.87334	0.699318	0.318423	1.01398	0.801577
8.4744	0.113275	1	0.668948	1.91863	1.46397	0.627892	1.27253	0.11058		8.477	0	1	0.352955	0.140359	1.10247	1.32225	7.07167	11.432		8.4636	-0.000285238	-1	0.0367647	0.425034	2.54557	0.85191	4.27731	8.73435		8.4765	0.0618247	1	0.865014	-0.039158	NaN	1.84773	NaN	2.4266		8.4663	0	1	0.661645	1.84406	0.650913	0.303692	1.0679	0.864767
8.9744	0.116965	1	0.727032	2.3012	1.53715	0.643926	1.29023	0.112496		8.977	0	1	0.358115	0.139818	1.08415	1.33241	7.06752	11.415		8.9636	-0.00015053	-1	0.0402593	0.429112	2.52609	0.861329	4.27129	8.69314		8.9765	0.0386675	1	0.821091	-0.0695978	NaN	2.05958	NaN	2.42045		8.9663	0	1	0.666875	1.85316	0.592916	0.287255	1.12185	0.914077
9.4744	0.115359	1	0.772832	2.72419	1.61675	0.647931	1.26751	0.11274		9.477	2.73286e-16	1	0.380707	0.137493	1.11286	1.37816	7.09465	11.3074		9.4636	-4.53879e-05	-1	0.0462657	0.428559	2.50247	0.871707	4.24622	8.69758		9.4765	0.0134136	1	0.774754	-0.0999246	NaN	2.24969	NaN	2.3999		9.4663	0	1	0.727053	1.84166	0.518477	0.355484	1.15394	1.04312
9.9744	0.108358	1	0.799938	3.17724	1.70476	0.635304	1.19355	0.110606		9.977	5.46571e-16	1	0.42957	0.131231	1.1993	1.48586	7.16675	11.1063		9.9636	1.11381e-05	-1	0.0540615	0.421745	2.47188	0.882102	4.19356	8.76331		9.9765	-0.0110946	1	0.733763	-0.128946	NaN	2.38338	NaN	2.35935		9.9663	0	1	0.82694	1.86649	0.474646	0.445699	1.17509	1.14927
10.4744	0.0954742	1	0.851239	3.64739	1.81002	0.643453	1.16802	0.11097		10.477	5.46571e-16	1	0.328888	0.196275	1.32738	1.15504	7.15357	10.6352		10.4636	5.46571e-16	-1	0.0705785	0.413558	2.60006	0.797697	4.09271	8.79094		10.4765	-0.0335651	1	0.805363	-0.335218	NaN	2.2406	NaN	2.28022		10.4663	0	1	1.00016	1.96314	0.491281	0.572883	1.17648	1.20568
10.9744	0.0770923	1	0.909577	3.93434	1.87501	0.643918	1.16656	0.107827		10.977	2.73286e-16	1	0.350807	0.283532	1.56494	1.06472	7.05021	10.4002		10.9636	2.73286e-16	-1	0.0663496	0.408396	2.44179	0.844861	4.03181	8.77122		10.9765	-0.0542239	1	0.677731	-0.190475	NaN	2.24704	NaN	2.2479		10.9663	0	1	1.20986	2.01054	0.521377	0.921346	1.15513	1.22699
11.4744	0.0551841	1	0.987442	4.09484	1.91958	0.651426	1.16077	0.103953		11.477	2.73286e-16	1	0.379993	0.346269	1.69551	0.996095	6.96305	10.2333		11.4636	2.73286e-16	-1	0.0717141	0.41546	2.333	0.872293	3.99921	8.75578		11.4765	-0.0729152	1	0.659007	-0.0454045	NaN	2.25281	NaN	2.22919		11.4663	0	1	1.43752	2.04459	0.559006	1.35414	1.12372	1.22119
11.9744	0.0312611	1	1.07488	4.16182	1.94883	0.663509	1.15101	0.0997781		11.977	5.46571e-16	1	0.41434	0.388794	1.73499	0.947336	6.89173	10.1241		11.9636	5.46571e-16	-1	0.0836143	0.431896	2.26696	0.885438	3.98885	8.74441		11.9765	-0.0892499	1	0.719516	0.104263	NaN	2.26642	NaN	2.21658		11.9663	0	1	1.69488	2.13421	0.615591	1.75144	1.08367	1.10029
12.4744	0.00622696	1	1.16192	4.16825	1.96786	0.677701	1.13764	0.0957346		12.477	5.46571e-16	1	0.451743	0.415418	1.69928	0.916634	6.8359	10.0623		12.4636	5.46571e-16	-1	0.0989921	0.454852	2.237	0.889743	3.99467	8.73691		12.4765	-0.103126	1	0.829583	0.262798	NaN	2.29637	NaN	2.2026		12.4663	0	1	1.90672	2.10531	0.61844	2.13775	1.04991	1.00316
12.9744	-0.018365	1	1.23862	4.14707	1.98179	0.691534	1.12101	0.0922528		12.977	2.73286e-16	1	0.490095	0.43045	1.60427	0.902174	6.79519	10.0379		12.9636	2.73286e-16	-1	0.11479	0.481475	2.23639	0.890653	4.01061	8.73308		12.9765	-0.112554	1	0.959534	0.434473	NaN	2.35116	NaN	2.17976		12.9663	0	1	2.07126	1.95325	0.565449	2.51263	1.02268	0.93074
13.4744	-0.0414484	1	1.29501	4.13124	1.99573	0.702541	1.10148	0.0897636		13.477	0	1	0.527291	0.438199	1.46589	0.902143	6.76925	10.0404		13.4636	0	-1	0.12795	0.508911	2.25844	0.893616	4.0306	8.73273		13.4765	-0.117257	1	1.07969	0.623556	NaN	2.43929	NaN	2.14058		13.4663	0	1	2.20068	1.87701	0.525315	2.57762	0.998903	0.876821
13.9744	-0.0618938	1	1.32113	4.15371	2.01477	0.708256	1.07941	0.0886979		13.977	0	1	0.561225	0.442975	1.30001	0.914729	6.7577	10.0597		13.9636	0	-1	0.135413	0.534308	2.29645	0.904077	4.04859	8.73563		13.9765	-0.117129	1	1.16038	0.83432	NaN	2.56927	NaN	2.07758		13.9663	0	1	2.32062	1.81346	0.489982	2.58584	0.980835	0.827916
14.4744	-0.0794452	1	1.30703	4.24744	2.04402	0.706211	1.05517	0.0894865		14.477	2.73286e-16	1	0.589792	0.449087	1.12256	0.938116	6.76021	10.0855		14.4636	0	-1	0.134123	0.554814	2.34372	0.927481	4.0585	8.7416		14.4765	-0.111547	1	1.17193	1.07103	NaN	2.7496	NaN	1.98327		14.4663	0	1	2.42727	1.75658	0.463252	2.55308	0.977547	0.786042
14.9744	-0.0941267	1	1.24276	4.44536	2.0886	0.693938	1.0291	0.0925602		14.977	0	1	0.610884	0.460844	0.949423	0.970492	6.77639	10.1076		14.9636	0	-1	0.121022	0.567573	2.39355	0.969277	4.05429	8.75043		14.9765	-0.100207	1	1.08467	1.33797	NaN	2.98879	NaN	1.85016		14.9663	0	1	2.5668	1.80779	0.441726	2.50929	0.96606	0.740836
15.4744	-0.105801	1	1.20973	4.52916	2.12721	0.664922	0.982332	0.0666663		15.477	0	1	0.700941	0.441012	0.828274	1.06194	6.75622	10.3355		15.4636	0	-1	0.12622	0.583178	2.36745	0.983627	4.02131	8.8084		15.4765	-0.0832958	1	0.567517	1.73484	NaN	3.15362	NaN	1.81402		15.4663	-0.00590822	1	2.72617	1.92425	0.423342	2.45885	0.949624	0.693617
15.9744	-0.113868	1	1.11366	4.93023	2.17817	0.694231	1.02646	0.0996942		15.977	-2.01888e-05	1	0.638946	0.537385	0.796466	1.04623	6.81147	10.1759		15.9636	2.73286e-16	-1	0.132765	0.568255	2.38912	1.13881	3.9832	8.76001		15.9765	-0.0622262	1	0.871717	2.22653	NaN	3.2629	NaN	1.66074		15.9663	-0.0213979	1	2.83295	1.9757	0.408549	2.40375	0.939561	0.693283
16.4744	-0.1175	1	1.02998	5.24747	2.24227	0.718708	1.05992	0.123616		16.477	-1.18499e-05	1	0.593085	0.559091	0.757338	1.06153	6.80884	10.0206		16.4636	2.73286e-16	-1	0.149153	0.554026	2.374	1.25808	3.94833	8.72768		16.4765	-0.0389478	1	1.00765	2.57672	NaN	3.34901	NaN	1.57198		16.4663	-0.046448	1	2.91441	2.01356	0.39392	2.37536	0.928004	0.699931
16.9744	-0.115505	1	0.959229	5.48795	2.31565	0.738607	1.08527	0.139293		16.977	-4.45642e-07	1	0.561447	0.523214	0.714258	1.10224	6.75949	9.87607		16.9636	0	-1	0.171631	0.541039	2.33249	1.34673	3.91818	8.70843		16.9765	-0.0148373	1	1.0429	2.80357	NaN	3.41578	NaN	1.53897		16.9663	-0.0740304	1	2.95067	2.02759	0.379548	2.39533	0.913669	0.718663
17.4744	-0.107813	1	0.901923	5.65875	2.39446	0.754181	1.10506	0.147586		17.477	-1.9568e-07	1	0.54212	0.446838	0.670596	1.16276	6.67461	9.74883		17.4636	0	-1	0.196447	0.52984	2.27499	1.41004	3.89426	8.69927		17.4765	0.00942149	1	1.04502	2.9252	NaN	3.467	NaN	1.55296		17.4663	-0.106663	1	2.86247	1.98983	0.369154	2.38144	0.896959	0.737724
17.9744	-0.0948806	1	0.858591	5.76693	2.47486	0.765683	1.12185	0.149355		17.977	-1.40767e-05	1	0.533193	0.347047	0.629724	1.23751	6.5654	9.6454		17.9636	2.73286e-16	-1	0.219847	0.520978	2.21187	1.4533	3.87806	8.69722		17.9765	0.0329959	-1	1.08158	2.95976	NaN	3.5065	NaN	1.60517		17.9663	-0.142111	1	2.67476	1.93976	0.357903	2.35223	0.87925	0.759537
18.4744	-0.077255	1	0.829756	5.81959	2.553	0.773367	1.13821	0.145461		18.477	-3.38227e-05	1	0.532753	0.240926	0.59501	1.32089	6.44304	9.57234		18.4636	2.73286e-16	-1	0.238079	0.514998	2.15354	1.48177	3.87106	8.6993		18.4765	0.054739	-1	1.22016	2.92537	NaN	3.53807	NaN	1.68685		18.4663	-0.180128	1	2.13858	1.92361	0.332945	2.30053	0.860427	0.797585
18.9744	-0.055777	1	0.815946	5.82379	2.62503	0.777487	1.1567	0.136765		18.977	-3.99248e-05	1	0.538889	0.145558	0.569824	1.4073	6.31871	9.53615		18.9636	2.73286e-16	-1	0.247388	0.512448	2.1104	1.50076	3.87477	8.70252		18.9765	0.0735917	-1	1.52831	2.84018	NaN	3.56554	NaN	1.78921		18.9663	-0.215039	1	1.69287	1.92838	0.314193	2.1898	0.843883	0.817131
19.4744	-0.0313777	1	0.817686	5.78661	2.6871	0.778296	1.17987	0.124128		19.477	1.85573e-05	1	0.549689	0.0780276	0.557536	1.49115	6.20361	9.54338		19.4636	5.46571e-16	-1	0.244024	0.513874	2.09282	1.51553	3.89067	8.7039		19.4765	0.0899269	-1	2.07361	2.72233	NaN	3.59272	NaN	1.90351		19.4663	-0.243117	1	1.32554	1.95127	0.300817	2.02792	0.829313	0.820646
19.9744	-0.00609425	1	0.835502	5.71512	2.73536	0.776047	1.21028	0.10841		19.977	0.000134902	1	0.563242	0.0554193	0.561516	1.56686	6.10891	9.60054		19.9636	5.46571e-16	-1	0.224232	0.519823	2.11121	1.53138	3.92027	8.70045		19.9765	0.102685	-1	2.92363	2.58995	NaN	3.62342	NaN	2.02096		19.9663	-0.264381	1	1.10663	1.98265	0.289996	1.95209	0.821608	0.808876
20.4744	0.0179237	1	0.864459	5.45258	2.76833	0.782984	1.2102	0.0968298		20.477	0.000387808	1	0.623116	-0.0178319	0.57592	1.60092	6.02742	9.84992		20.4636	5.46571e-16	-1	0.27308	0.514717	2.07839	1.50592	3.825	8.48842		20.4765	0.111867	-1	2.07924	2.49708	NaN	3.34148	NaN	2.14502		20.4663	-0.285623	1	1.04056	2.00225	0.282849	1.91393	0.815173	0.78737
20.9744	0.0408174	1	0.797156	5.56567	2.83419	0.797848	1.24193	0.0928336		20.977	0.000387558	1	0.571878	0.0105132	0.561039	1.64634	6.00907	9.79618		20.9636	2.73286e-16	-1	0.258479	0.521561	2.05312	1.51893	3.80676	8.44359		20.9765	0.117381	-1	1.73261	2.33393	NaN	3.14905	NaN	2.15908		20.9663	-0.303701	1	1.26554	1.99639	0.282853	1.94006	0.810308	0.748202
21.4744	0.0613589	1	0.755548	5.52284	2.89025	0.812174	1.25489	0.0895401		21.477	0.000401439	1	0.553942	0.0220418	0.548322	1.65515	5.99204	9.77614		21.4636	2.73286e-16	-1	0.265028	0.53114	2.02203	1.52744	3.7848	8.42845		21.4765	0.116793	-1	1.37404	2.19852	NaN	2.98309	NaN	2.17823		21.4663	-0.32171	1	1.41757	1.99331	0.27872	2.00063	0.806396	0.718729
21.9744	0.0792619	1	0.734327	5.3584	2.93767	0.825637	1.25255	0.0872737		21.977	0.000421185	1	0.561272	0.0219666	0.538448	1.63476	5.97685	9.7765		21.9636	2.73286e-16	-1	0.287667	0.541331	1.98656	1.53307	3.7613	8.43927		21.9765	0.110082	-1	1.02433	2.08658	NaN	2.84501	NaN	2.20228		21.9663	-0.333191	1	1.5403	1.98945	0.272606	2.07664	0.802468	0.694458
22.4744	0.0945127	1	0.728187	5.10665	2.97758	0.837914	1.23843	0.0863587		22.477	0.000447476	1	0.585833	0.0155005	0.532096	1.59262	5.96404	9.78398		22.4636	0	-1	0.321337	0.55001	1.94816	1.53743	3.73845	8.4723		22.4765	0.0986205	-1	0.70428	1.99385	NaN	2.73621	NaN	2.23105		22.4663	-0.334497	1	1.65115	1.96676	0.262571	2.17462	0.794621	0.685114
22.9744	0.106353	1	0.731821	4.80191	3.01113	0.848679	1.21601	0.0871191		22.977	0.000400844	1	0.619591	0.00785643	0.529945	1.53617	5.95413	9.78528		22.9636	-5.46571e-16	-1	0.360978	0.555056	1.90829	1.54213	3.71843	8.52377		22.9765	0.0823179	-1	0.434694	1.91604	NaN	2.65811	NaN	2.26436		22.9663	-0.325622	1	1.74754	1.94792	0.257505	2.27007	0.789014	0.687785
23.4744	0.114274	1	0.739922	4.47849	3.03945	0.857608	1.18878	0.0898792		23.477	0.000264756	1	0.654511	0.00424726	0.532674	1.47284	5.94764	9.76711		23.4636	-5.46571e-16	-1	0.401531	0.554344	1.8684	1.54878	3.70343	8.58996		23.4765	0.06211	-1	0.23637	1.8489	NaN	2.61213	NaN	2.30202		23.4663	-0.313335	1	1.82731	1.9335	0.258148	2.36263	0.78598	0.704257
23.9744	0.118016	1	0.747182	4.17071	3.06371	0.864376	1.16026	0.0949632		23.977	1.9568e-07	1	0.682557	0.00988586	0.540962	1.41006	5.94512	9.71618		23.9636	-5.46571e-16	-1	0.437937	0.545752	1.82994	1.559	3.69563	8.66712		23.9765	0.0389819	-1	0.130105	1.78814	NaN	2.59967	NaN	2.34385		23.9663	-0.295538	1	1.87051	1.89134	0.253379	2.44131	0.778679	0.727782
24.4744	0.116111	1	0.748296	3.91288	3.08503	0.868658	1.13392	0.102695		24.477	1.40767e-05	1	0.695696	0.0299851	0.555488	1.35528	5.94707	9.6192		24.4636	-8.19857e-16	-1	0.465135	0.527158	1.79436	1.57439	3.69723	8.75148		24.4765	0.013458	-1	0.136699	1.72951	NaN	2.62215	NaN	2.38968		24.4663	-0.274287	1	1.89862	1.85025	0.249931	2.48795	0.77339	0.758833
24.9744	0.108939	1	0.737954	3.73931	3.10457	0.87013	1.11326	0.1134		24.977	3.38227e-05	1	0.685892	0.0697579	0.576932	1.31593	5.95404	9.46287		24.9636	-8.19857e-16	-1	0.478067	0.496438	1.76311	1.59656	3.7104	8.83932		24.9765	-0.0113129	-1	0.276952	1.66873	NaN	2.68098	NaN	2.43932		24.9663	-0.249296	1	1.89996	1.82651	0.253213	2.44527	0.776329	0.808944
25.4744	0.0959859	1	0.702977	4.2834	3.08459	0.860236	1.08135	0.114		25.477	3.99248e-05	1	0.683523	0.123166	0.59798	1.34283	6.0065	9.61263		25.4636	-8.19857e-16	-1	0.446063	0.496102	1.69069	1.56954	3.69434	8.81575		25.4765	-0.0341403	-1	0.385039	1.53824	NaN	2.71552	NaN	2.48778		25.4663	-0.227271	1	1.89819	1.79581	0.251074	2.37557	0.774682	0.848668
25.9744	0.0780191	1	0.747286	4.90427	3.04399	0.823305	1.11552	0.115317		25.977	-1.85573e-05	1	0.648264	0.110137	0.588078	1.47871	5.9863	9.72547		25.9636	9.71537e-05	-1	0.457257	0.49242	1.64869	1.58132	3.70276	8.77934		25.9765	-0.0553692	-1	0.510803	1.50463	NaN	2.72922	NaN	2.48859		25.9663	-0.211819	1	1.8946	1.76084	0.246238	2.29022	0.770434	0.882838
26.4744	0.0564484	1	0.817994	5.33234	3.02056	0.787047	1.14317	0.119755		26.477	-0.000134902	1	0.596536	0.096479	0.585191	1.53638	5.95219	9.84347		26.4636	4.97958e-05	-1	0.455019	0.464648	1.61234	1.56693	3.71952	8.7741		26.4765	-0.0741337	-1	0.591596	1.46415	NaN	2.71163	NaN	2.49919		26.4663	-0.202253	1	1.88789	1.71179	0.251156	2.18028	0.763779	0.922783
26.9744	0.0329519	1	0.904983	5.59763	3.01193	0.753232	1.16506	0.126893		26.977	-0.000387808	1	0.537835	0.0829598	0.585449	1.54159	5.91208	9.95898		26.9636	-7.30496e-05	-1	0.44168	0.41922	1.58082	1.53312	3.74149	8.79176		26.9765	-0.0901758	-1	0.63868	1.41902	NaN	2.67053	NaN	2.51653		26.9663	-0.192731	1	1.87551	1.66748	0.250162	2.08131	0.75661	0.954807
27.4744	0.00786942	1	0.998135	5.73014	3.01573	0.72363	1.18192	0.136307		27.477	-0.000387558	1	0.481658	0.0703473	0.584981	1.52009	5.8739	10.0644		27.4636	-0.000217458	-1	0.419572	0.362569	1.55329	1.48663	3.76552	8.82409		27.4765	-0.103794	-1	0.663316	1.37148	NaN	2.61371	NaN	2.53756		27.4663	-0.185571	1	1.85459	1.63031	0.240263	1.99887	0.748667	0.974901
27.9744	-0.0167293	1	1.08733	5.75989	3.0296	0.700011	1.19451	0.147577		27.977	-0.000401439	-1	0.437502	0.0594094	0.579915	1.49763	5.84554	10.152		27.9636	-0.000344605	-1	0.391024	0.301129	1.52895	1.43421	3.78847	8.86282		27.9765	-0.112757	-1	0.676768	1.32377	NaN	2.54895	NaN	2.55922		27.9663	-0.178343	1	1.80551	1.59774	0.240588	1.91846	0.743356	0.999188
28.4744	-0.0397983	1	1.16246	5.71689	3.05115	0.684144	1.20358	0.16028		28.477	-0.000421185	-1	0.414863	0.050914	0.566381	1.49995	5.83492	10.2142		28.4636	-0.000430767	-1	0.358368	0.241334	1.50696	1.38262	3.8072	8.89971		28.4765	-0.11689	-1	0.690296	1.2781	NaN	2.48404	NaN	2.57846		28.4663	-0.171305	1	1.74295	1.56621	0.243265	1.84613	0.738914	1.02192
28.9744	-0.0602303	1	1.21339	5.63114	3.07804	0.6778	1.20987	0.173994		28.977	-0.000427287	-1	0.423239	0.045629	0.540506	1.55282	5.84996	10.2434		28.9636	-0.000467318	-1	0.323933	0.189617	1.4865	1.33861	3.81856	8.92651		28.9765	-0.116115	-1	0.715163	1.23672	NaN	2.42676	NaN	2.59222		28.9663	-0.163909	1	1.65397	1.53403	0.244735	1.80592	0.735275	1.03346
29.4744	-0.0781615	1	1.23002	5.53265	3.10788	0.682749	1.21413	0.188297		29.477	-0.000388994	-1	0.472125	0.0443225	0.498421	1.68198	5.89855	10.2319		29.4636	-0.000557889	-1	0.290052	0.152413	1.46675	1.30891	3.81943	8.93497		29.4765	-0.110273	-1	0.762632	1.20185	NaN	2.38491	NaN	2.59744		29.4663	-0.156225	1	1.56517	1.50261	0.252575	1.77138	0.729318	1.04327
29.9744	-0.0933138	1	1.20223	5.45143	3.13831	0.700759	1.21712	0.202768		29.977	-0.000264311	-1	0.57102	0.0477623	0.436253	1.91318	5.98863	10.1721		29.9636	-0.000482389	-1	0.259053	0.136154	1.44688	1.30029	3.80665	8.91682		29.9765	-0.0989963	-1	0.843964	1.17572	NaN	2.36627	NaN	2.59107		29.9663	-0.15011	1	1.47649	1.47173	0.264944	1.74087	0.721715	1.05186
30.4744	-0.105614	1	1.21435	5.40398	3.13511	0.798956	1.2461	0.044991		30.477	2.73286e-16	-1	0.679116	0.274273	0.470384	1.81788	5.87731	10.4383		30.4636	-0.000346518	-1	0.195149	0.113171	1.42888	1.2526	3.72715	8.70988		30.4765	-0.0823932	-1	0.869479	1.15094	NaN	2.31646	NaN	2.59503		30.4663	-0.142934	1	1.38082	1.43796	0.273668	1.70286	0.715188	1.04364
30.9744	-0.113986	1	1.09449	5.46674	3.26235	0.811485	1.15626	0.182086		30.977	-8.69821e-05	-1	0.867734	0.571726	0.512251	1.72981	5.93623	10.5692		30.9636	-0.00020211	-1	0.190437	0.132375	1.39927	1.26347	3.73163	8.74764		30.9765	-0.0607375	-1	0.913694	1.13623	NaN	2.28882	NaN	2.59644		30.9663	-0.136188	1	1.29622	1.40696	0.28236	1.66084	0.709541	1.04592
31.4744	-0.117791	1	0.967563	5.48486	3.27846	0.80877	1.07143	0.240414		31.477	-6.7589e-05	-1	1.00737	0.779271	0.557286	1.64047	6.05443	10.6798		31.4636	-7.49624e-05	-1	0.188712	0.14433	1.37684	1.26818	3.72357	8.76252		31.4765	-0.037074	-1	0.989199	1.11017	NaN	2.25329	NaN	2.59874		31.4663	-0.130352	1	1.23165	1.38103	0.291217	1.61215	0.705389	1.06784
31.9744	-0.115881	1	0.838936	5.46745	3.20476	0.794821	1.00682	0.245029		31.977	-1.9013e-05	-1	1.10576	0.906072	0.607687	1.5591	6.21175	10.7624		31.9636	1.11991e-05	-1	0.190653	0.150258	1.36005	1.2676	3.70594	8.76011		31.9765	-0.0125589	-1	1.08594	1.07636	NaN	2.21267	NaN	2.60055		31.9663	-0.124058	1	1.16103	1.34612	0.300912	1.56064	0.705706	1.10107
32.4744	-0.108575	1	0.713977	5.42363	3.06257	0.773651	0.977638	0.22099		32.477	8.91824e-06	-1	1.17065	0.961292	0.665657	1.49491	6.38801	10.8095		32.4636	-4.94031e-05	-1	0.19694	0.151379	1.34738	1.2626	3.68172	8.74602		32.4765	0.011829	-1	1.19386	1.0384	NaN	2.16978	NaN	2.60046		32.4663	-0.117807	1	1.09274	1.30866	0.310421	1.50146	0.706695	1.1413
32.9744	-0.0959913	1	0.598052	5.36253	2.87322	0.749271	0.999089	0.193352		32.977	-6.25842e-06	-1	1.20976	0.954096	0.733395	1.45711	6.56304	10.8137		32.9636	-8.62814e-06	-1	0.208249	0.148915	1.3373	1.25405	3.65386	8.72585		32.9765	0.0354052	-1	1.30291	0.999902	NaN	2.12741	NaN	2.59708		32.9663	-0.111991	1	1.05502	1.27589	0.316616	1.39719	0.701318	1.20115
33.4744	-0.0786759	1	0.49653	5.29328	2.65803	0.725691	1.08638	0.187172		33.477	-5.96414e-05	-1	1.23083	0.893646	0.813103	1.45492	6.71668	10.7674		33.4636	8.60752e-05	-1	0.22526	0.144087	1.32827	1.24283	3.62536	8.70521		33.4765	0.0571047	-1	1.40304	0.964453	NaN	2.08839	NaN	2.58902		33.4663	-0.104486	1	1.02529	1.21434	0.324381	1.29473	0.696242	1.25127
33.9744	-0.0574571	1	0.414777	5.22499	2.43833	0.706924	1.25473	0.227506		33.977	-0.000118965	-1	1.2416	0.789106	0.906981	1.49756	6.82874	10.6631		33.9636	0.000217458	-1	0.248652	0.138117	1.31877	1.22979	3.59918	8.6897		33.9765	0.0758995	-1	1.48419	0.935657	NaN	2.0555	NaN	2.57488		33.9663	-0.0979638	1	1.00332	1.12479	0.333676	1.19404	0.691458	1.29191
34.4744	-0.0330502	1	0.358162	5.16678	2.23543	0.696981	1.51934	0.339412		34.477	-3.76153e-05	-1	1.2498	0.649641	1.01723	1.59425	6.87905	10.4932		34.4636	0.000344605	-1	0.279101	0.132226	1.30727	1.21582	3.5783	8.68492		34.4765	0.0914213	-1	1.5363	0.917115	NaN	2.03157	NaN	2.55327		34.4663	-0.0905381	1	0.978147	1.03226	0.346142	1.11518	0.685484	1.31126
34.9744	-0.00769152	1	0.332053	5.12779	2.07067	0.699873	1.89541	0.547946		34.977	7.80447e-05	-1	1.26318	0.484412	1.14605	1.75421	6.84745	10.2503		34.9636	0.000430767	-1	0.317287	0.127635	1.29223	1.20178	3.56568	8.69647		34.9765	0.103481	-1	1.54933	0.912427	NaN	2.0194	NaN	2.5228		34.9663	-0.0824741	1	0.968138	0.936285	0.360979	1.0615	0.680693	1.31585
35.4744	0.0166785	1	0.342791	5.07334	1.84307	0.71003	2.50626	0.790946		35.477	0.000419568	-1	1.07878	0.446336	0.872496	1.59787	6.51206	10.2599		35.4636	0.000467318	-1	0.324111	0.0994709	1.29839	1.20348	3.57977	8.68249		35.4765	0.111989	-1	1.31409	0.891136	NaN	1.99877	NaN	2.56278		35.4663	-0.074262	1	0.995679	0.832745	0.380719	1.06303	0.679079	1.29031
35.9744	0.0398625	1	0.263583	5.0679	1.75477	0.607109	2.65879	1.30092		35.977	0.00158401	-1	1.26037	0.423146	1.08928	2.15025	6.65663	10.056		35.9636	0.000557889	-1	0.388473	0.106086	1.2758	1.19225	3.55711	8.68624		35.9765	0.117318	-1	1.14166	0.931393	NaN	1.97782	NaN	2.57042		35.9663	-0.0658301	1	1.09504	0.769203	0.398752	1.0356	0.684901	1.29913
36.4744	0.0607395	1	0.200084	4.9114	1.69853	0.54108	2.77777	1.89705		36.477	0.00457492	-1	1.33893	0.486636	1.14235	2.54463	6.69425	9.94493		36.4636	0.000482389	-1	0.440938	0.110656	1.25974	1.17976	3.53489	8.69162		36.4765	0.116794	-1	1.09781	0.946964	NaN	1.96853	NaN	2.57972		36.4663	-0.0550016	1	1.23158	0.724596	0.415632	0.99312	0.694199	1.32505
36.9744	0.0789566	1	0.151202	4.63713	1.66511	0.507089	2.8861	2.55511		36.977	0.00928586	-1	1.34476	0.610869	1.07843	2.80394	6.64947	9.90905		36.9636	0.000346518	-1	0.480736	0.113927	1.24798	1.16694	3.51497	8.69773		36.9765	0.110322	-1	1.14729	0.94281	NaN	1.96684	NaN	2.58879		36.9663	-0.0443756	1	1.41593	0.686806	0.428385	0.930854	0.704279	1.36626
37.4744	0.0945966	1	0.115843	4.27837	1.64525	0.500284	3.0067	3.25089		37.477	0.015634	-1	1.30819	0.769909	0.944254	2.95111	6.54683	9.93089		37.4636	0.00020211	-1	0.507098	0.116649	1.23834	1.15472	3.49916	8.70365		37.4765	0.0984707	-1	1.25484	0.923892	NaN	1.96871	NaN	2.59576		37.4663	-0.0318185	1	1.59596	0.64638	0.440959	0.820823	0.720233	1.41627
37.9744	0.106543	-1	0.0929148	3.86841	1.6297	0.515812	3.16247	3.96018		37.977	0.0231929	-1	1.25951	0.937818	0.786566	3.00904	6.41087	9.99298		37.9636	7.49624e-05	-1	0.519254	0.119568	1.22858	1.14402	3.48931	8.7085		37.9765	0.0819923	-1	1.38521	0.895172	NaN	1.97008	NaN	2.59874		37.9663	-0.0186738	1	1.77128	0.603075	0.45334	0.658631	0.742603	1.47591
38.4744	0.114298	-1	0.0813228	3.44055	1.60919	0.548818	3.37634	4.65875		38.477	0.0317432	-1	1.22905	1.08866	0.652099	3.00067	6.26614	10.0778		38.4636	-1.11991e-05	-1	0.516435	0.123433	1.21651	1.13578	3.48724	8.71136		38.4765	0.0617442	-1	1.50314	0.861611	NaN	1.96692	NaN	2.59586		38.4663	-0.00570673	-1	1.83888	0.587881	0.475404	0.543183	0.767983	1.54468
38.9744	0.117556	-1	0.0799744	3.02807	1.57448	0.59445	3.67121	5.32241		38.977	0.0409748	-1	1.24709	1.1965	0.587587	2.94892	6.13717	10.1679		38.9636	-4.77506e-05	-1	0.497871	0.128992	1.19991	1.13093	3.49481	8.71133		38.9765	0.0386349	-1	1.57339	0.828169	NaN	1.95515	NaN	2.58524		38.9663	0.00671086	-1	1.87766	0.569262	0.497673	0.44603	0.794145	1.60966
39.4744	0.115644	-1	0.0877761	2.66425	1.51631	0.647854	4.07	5.92693		39.477	0.0500815	1	1.34397	1.23539	0.639766	2.8767	6.04852	10.2457		39.4636	-4.11676e-05	-1	0.462793	0.136992	1.17658	1.13038	3.51383	8.70752		39.4765	0.0130259	-1	1.56069	0.799808	NaN	1.93075	NaN	2.56499		39.4663	0.0186975	-1	1.88045	0.527539	0.516096	0.381669	0.821242	1.65913
39.9744	0.108525	-1	0.103635	2.3824	1.42543	0.704177	4.59562	6.4481		39.977	0.0577597	1	1.54998	1.17941	0.855372	2.80694	6.0247	10.2938		39.9636	-1.30256e-05	-1	0.410431	0.148182	1.14429	1.13508	3.54616	8.69901		39.9765	-0.0118845	-1	1.42979	0.78149	NaN	1.88965	NaN	2.53323		39.9663	0.0280974	-1	1.88325	0.485817	0.534518	0.317309	0.848339	1.7086
40.4744	0.0957269	-1	0.0902115	2.25332	1.36311	0.713314	4.784	6.9645		40.477	0.0637252	1	1.69981	1.02542	0.849936	2.71836	5.88489	10.5033		40.4636	0	-1	0.413996	0.104937	1.14601	1.16819	3.46953	8.57315		40.4765	-0.0350063	-1	0.00410177	0.746811	NaN	1.7641	NaN	2.43		40.4663	0.0368294	-1	1.8486	0.445441	0.565993	0.291774	0.833905	1.82781
40.9744	0.07731	-1	0.056346	2.11029	1.3561	0.765857	5.03833	7.33294		40.977	0.0679343	1	2.11346	1.03055	1.36377	2.60018	5.68251	10.3162		40.9636	0	-1	0.376514	0.0753221	1.1411	1.22448	3.47581	8.6513		40.9765	-0.055888	-1	0.945828	0.735351	NaN	1.75265	NaN	2.40531		40.9663	0.0429918	-1	1.80288	0.402847	0.599781	0.27743	0.808434	1.9766
41.4744	0.0554954	-1	0.0333045	1.98817	1.33764	0.796278	5.19162	7.62871		41.477	0.0683202	1	2.47907	1.10043	1.7556	2.48991	5.40284	10.1464		41.4636	0	-1	0.357343	0.0516136	1.13788	1.2588	3.47128	8.6671		41.4765	-0.07438	1	1.54979	0.704691	NaN	1.70877	NaN	2.37259		41.4663	0.0472355	-1	1.75723	0.34561	0.624898	0.261403	0.789997	2.17552
41.9744	0.0316416	-1	0.018857	1.88336	1.31042	0.80863	5.25907	7.85939		41.977	0.065031	1	2.78896	1.22197	2.04289	2.38607	5.07858	9.97756		41.9636	2.73286e-16	-1	0.353318	0.0332497	1.13685	1.27775	3.45553	8.63563		41.9765	-0.0902393	1	1.86971	0.660795	NaN	1.64076	NaN	2.33422		41.9663	0.049742	-1	1.70215	0.322984	0.649203	0.256168	0.761594	2.40258
42.4744	0.00667824	-1	0.0107739	1.79224	1.27711	0.806967	5.25585	8.03256		42.477	0.0578398	1	3.03546	1.38208	2.24311	2.28719	4.74245	9.79349		42.4636	2.73286e-16	-1	0.361272	0.0196685	1.13851	1.28796	3.42813	8.57198		42.4765	-0.103845	1	1.95932	0.609627	NaN	1.55692	NaN	2.29258		42.4663	0.0506804	-1	1.63891	0.330344	0.672802	0.260283	0.724555	2.65403
42.9744	-0.0178855	-1	0.00682526	1.7112	1.2404	0.795344	5.19713	8.15583		42.977	0.0461427	1	3.21089	1.56769	2.37374	2.19181	4.42715	9.57791		42.9636	0	-1	0.378039	0.0103079	1.14336	1.29603	3.38866	8.49123		42.9765	-0.112812	1	1.87233	0.557149	NaN	1.46556	NaN	2.25006		42.9663	0.049032	-1	1.60791	0.337356	0.696111	0.259028	0.756547	2.97235
43.4744	-0.0410332	-1	0.00478143	1.63662	1.20296	0.777814	5.0981	8.23678		43.477	0.0304762	1	3.30757	1.76569	2.45226	2.09844	4.16537	9.31454		43.4636	-2.73286e-16	-1	0.400453	0.00460596	1.15189	1.30857	3.33671	8.40846		43.4765	-0.11694	1	1.66247	0.509324	NaN	1.37498	NaN	2.20904		43.4663	0.0453636	-1	1.57344	0.352868	0.719382	0.258631	0.795126	3.31329
43.9744	-0.0616486	-1	0.00241258	1.5649	1.16749	0.758432	4.97394	8.28299		43.977	0.01147	1	3.31785	1.96302	2.49612	2.00562	3.98983	8.98715		43.9636	-2.73286e-16	-1	0.425348	0.0020007	1.1646	1.33221	3.27185	8.33878		43.9765	-0.116092	1	1.38347	0.472115	NaN	1.29348	NaN	2.17191		43.9663	0.0392184	-1	1.52503	0.387763	0.742625	0.261196	0.835701	3.6931
44.4744	-0.0792868	-1	-0.00251106	1.49241	1.13665	0.74125	4.83983	8.30206		44.477	-0.0105075	1	3.23403	2.14656	2.5228	1.91187	3.93323	8.57945		44.4636	-2.73286e-16	-1	0.449557	0.00193014	1.18198	1.37354	3.19366	8.29724		44.4765	-0.110171	1	1.08905	0.451486	NaN	1.22936	NaN	2.14106		44.4663	0.0314544	-1	1.499	0.425307	0.765222	0.252149	0.884049	4.15885
44.9744	-0.0941715	-1	-0.0122193	1.41554	1.11314	0.730324	4.71094	8.30158		44.977	-0.0327187	1	3.04844	2.30325	2.54978	1.81572	4.02827	8.07519		44.9636	-2.73286e-16	-1	0.469914	0.00383229	1.20454	1.4392	3.10173	8.29896		44.9765	-0.098972	1	0.832925	0.4534	NaN	1.19094	NaN	2.11886		44.9663	0.0224224	-1	1.48165	0.464476	0.787113	0.238744	0.936854	4.66498
45.4744	-0.105986	-1	0.147888	1.36522	1.02246	0.713166	4.14429	8.50002		45.477	-0.0548453	1	2.78282	2.16962	2.41563	1.65903	3.98469	8.04685		45.4636	0	-1	0.533908	0.025149	1.24985	1.54384	3.02256	8.22206		45.4765	-0.0825061	1	0.96547	0.340235	NaN	1.46873	NaN	2.10475		45.4663	0.0131706	-1	1.44242	0.508374	0.804031	0.238478	0.999754	5.17346
45.9744	-0.114283	-1	0.0218443	1.25262	1.07056	0.724397	4.37042	8.34242		45.977	-0.0753064	1	2.39689	2.17651	2.25638	1.55202	3.98216	7.91466		45.9636	-2.73286e-16	-1	0.487029	0.010174	1.25417	1.58075	3.00243	8.35142		45.9765	-0.0611066	1	0.787359	0.373121	NaN	1.29816	NaN	2.00579		45.9663	0.00328053	-1	1.42271	0.535344	0.814229	0.242719	1.05046	5.64089
46.4744	-0.117948	-1	-0.0316648	1.15611	1.09074	0.738356	4.46498	8.23146		46.477	-0.0935988	1	2.06227	2.08791	2.11027	1.46789	4.0101	7.95384		46.4636	2.73286e-16	-1	0.452749	8.84593e-05	1.26284	1.6014	2.97361	8.45982		46.4765	-0.0377185	1	0.671741	0.47584	NaN	1.30475	NaN	1.91859		46.4663	-0.00597125	-1	1.42526	0.54301	0.816763	0.252099	1.08725	6.0615
46.9744	-0.115904	-1	-0.0268734	1.07372	1.08779	0.753192	4.46545	8.16391		46.977	-0.10901	1	1.77519	1.93074	1.98036	1.40114	4.06259	8.10445		46.9636	2.73286e-16	-1	0.42993	-0.00600235	1.27497	1.60911	2.94038	8.54778		46.9765	-0.0133429	1	0.60714	0.62263	NaN	1.4459	NaN	1.84761		46.9663	-0.0147032	-1	1.4223	0.547418	0.821576	0.266194	1.13921	6.378
47.4744	-0.108005	-1	0.0219847	1.00349	1.06648	0.767055	4.40933	8.13653		47.477	-0.121204	1	1.53189	1.7319	1.86974	1.34625	4.13367	8.30661		47.4636	2.73286e-16	-1	0.417436	-0.00899303	1.28969	1.60724	2.90704	8.61585		47.4765	0.0110195	1	0.582078	0.787729	NaN	1.67898	NaN	1.79729		47.4663	-0.0226153	-1	1.43034	0.557495	0.824835	0.279054	1.18838	6.6429
47.9744	-0.0950358	-1	0.100676	0.943454	1.0316	0.778091	4.33409	8.1461		47.977	-0.12759	-1	1.32861	1.5183	1.78149	1.29771	4.2174	8.50039		47.9636	2.73286e-16	-1	0.414127	-0.00977821	1.30612	1.59912	2.87786	8.66458		47.9765	0.0345132	1	0.585079	0.945375	NaN	1.96138	NaN	1.77209		47.9663	-0.0293568	-1	1.47441	0.58635	0.822251	0.285808	1.22146	6.80437
48.4744	-0.0775029	-1	0.194966	0.891638	0.987917	0.784452	4.27723	8.18936		48.477	-0.12811	-1	1.16159	1.31686	1.7187	1.25001	4.30784	8.62588		48.4636	0	-1	0.418866	-0.00925254	1.3234	1.5881	2.85714	8.69451		48.4765	0.0561101	1	0.604666	1.06981	NaN	2.25047	NaN	1.77646		48.4663	-0.0355613	-1	1.49983	0.619388	0.830889	0.288381	1.26788	6.90119
48.9744	-0.0562109	-1	0.290622	0.846077	0.940212	0.784284	4.27623	8.2631		48.977	-0.122759	-1	1.02706	1.15448	1.68444	1.19765	4.39905	8.62317		48.9636	0	-1	0.430515	-0.00831064	1.34063	1.5775	2.84915	8.70617		48.9765	0.0747804	1	0.629363	1.13526	NaN	2.50365	NaN	1.81485		48.9663	-0.0414744	-1	1.51486	0.65442	0.846034	0.288549	1.32213	6.95917
49.4744	-0.0318658	-1	0.37341	0.804804	0.893264	0.775736	4.36858	8.36407		49.477	-0.112376	-1	0.921283	1.05807	1.68179	1.1351	4.48508	8.43235		49.4636	2.73286e-16	-1	0.447937	-0.00784713	1.35695	1.57068	2.8582	8.70012		49.4765	0.0903736	1	0.647692	1.11597	NaN	2.67829	NaN	1.89171		49.4663	-0.04617	-1	1.53288	0.678431	0.867584	0.286974	1.38726	6.9383
49.9744	-0.006618	-1	0.429095	0.765851	0.85185	0.756959	4.59176	8.48904		49.977	-0.0963035	-1	0.840481	1.05454	1.71384	1.05686	4.56	7.99351		49.9636	2.73286e-16	-1	0.469994	-0.00875667	1.37148	1.57098	2.88855	8.6769		49.9765	0.102521	1	0.648177	0.986186	NaN	2.73178	NaN	2.01148		49.9663	-0.0503545	-1	1.53404	0.682224	0.890141	0.29351	1.43049	6.91796
50.4744	0.0177116	-1	0.596431	0.708157	0.809987	0.762667	4.78254	8.67331		50.477	-0.0751912	-1	0.689185	0.915744	1.54162	1.0564	4.46525	8.26132		50.4636	2.73286e-16	-1	1.50368	-0.00797876	1.46631	1.46066	2.92274	8.59459		50.4765	0.111028	1	0.638443	0.83337	NaN	2.71933	NaN	1.95802		50.4663	-0.0539598	-1	1.51164	0.65775	0.914107	0.311385	1.44312	6.89835
50.9744	0.0403954	-1	0.494962	0.653706	0.798814	0.725436	5.16338	8.60134		50.977	-0.0503628	-1	0.606772	0.852852	1.45432	1.05055	4.55999	8.59152		50.9636	9.3459e-05	-1	0.518219	-0.0261666	1.48005	1.55538	2.87763	8.47019		50.9765	0.116669	1	0.557886	0.731361	NaN	2.47969	NaN	2.13399		50.9663	-0.0562971	-1	1.49592	0.638092	0.932441	0.330145	1.46827	6.90237
51.4744	0.0610873	-1	0.452809	0.609852	0.782773	0.695521	5.41974	8.52302		51.477	-0.0247922	-1	0.520008	0.788907	1.39258	1.04126	4.59109	8.87421		51.4636	5.08387e-05	-1	0.276367	-0.00157267	1.59548	1.59771	2.89783	8.40965		51.4765	0.116591	1	0.481712	0.657014	NaN	2.30103	NaN	2.26613		51.4663	-0.0579455	-1	1.48275	0.623362	0.946867	0.350445	1.49343	6.92263
51.9744	0.0792802	-1	0.455375	0.574725	0.762713	0.672309	5.57288	8.44085		51.977	0.000929209	-1	0.4343	0.727137	1.35136	1.03021	4.5743	9.10823		51.9636	-8.78614e-05	-1	0.616526	0.0552513	1.78324	1.59631	2.96558	8.3926		51.9765	0.110559	1	0.413072	0.603737	NaN	2.17415	NaN	2.35503		51.9663	-0.0586431	-1	1.47279	0.625335	0.950387	0.376766	1.50246	6.98789
52.4744	0.0949059	-1	0.488064	0.54646	0.739484	0.65519	5.64409	8.35737		52.477	0.0254187	-1	0.355055	0.670773	1.32558	1.0191	4.52533	9.29244		52.4636	-0.000286416	1	1.37709	0.133754	2.01399	1.55989	3.06315	8.3987		52.4765	0.0992874	1	0.355113	0.564938	NaN	2.08984	NaN	2.40131		52.4663	-0.0581529	-1	1.45895	0.639204	0.957881	0.394585	1.52669	7.07227
52.9744	0.106793	-1	0.53628	0.523189	0.713936	0.643551	5.65463	8.2751		52.977	0.0488446	-1	0.287679	0.623043	1.31018	1.00961	4.45993	9.42567		52.9636	-0.000512374	1	2.39647	0.223383	2.25837	1.49711	3.1728	8.40759		52.9765	0.0833461	-1	0.310984	0.534025	NaN	2.03888	NaN	2.40558		52.9663	-0.0569231	-1	1.44222	0.661947	0.968339	0.406063	1.56224	7.17091
53.4744	0.114437	-1	0.585424	0.503046	0.686917	0.636782	5.62579	8.19657		53.477	0.0701222	-1	0.23758	0.587175	1.3001	1.00341	4.39381	9.50677		53.4636	-0.000737057	1	3.51305	0.313587	2.48705	1.41667	3.27679	8.3989		53.4765	0.0635479	-1	0.283834	0.504406	NaN	2.01205	NaN	2.36843		53.4663	-0.0545647	-1	1.43514	0.677596	0.982252	0.411772	1.58946	7.24832
53.9744	0.117541	-1	0.6209	0.484163	0.659277	0.63427	5.57884	8.1243		53.977	0.0881912	-1	0.210165	0.5664	1.29029	1.00221	4.3427	9.53458		53.9636	-0.000935563	1	4.56524	0.393815	2.67066	1.32724	3.35738	8.35229		53.9765	0.0408005	-1	0.276812	0.469488	NaN	2.00013	NaN	2.29048		53.9663	-0.0506173	-1	1.42509	0.693425	0.995147	0.416434	1.61274	7.32518
54.4744	0.115549	-1	0.628112	0.464675	0.631865	0.635405	5.53505	8.06083		54.477	0.103014	-1	0.210839	0.563945	1.27567	1.00767	4.32234	9.50795		54.4636	-0.00118022	1	5.39143	0.453515	2.77986	1.23752	3.39682	8.24739		54.4765	0.0151324	-1	0.293066	0.422681	NaN	1.99392	NaN	2.17234		54.4663	-0.0462303	-1	1.40927	0.709971	1.00606	0.41958	1.62959	7.40229
54.9744	0.10836	-1	0.592463	0.442712	0.60553	0.639574	5.5157	8.00867		54.977	0.113922	-1	0.24501	0.583041	1.25119	1.02148	4.34846	9.42573		54.9636	-0.00122414	1	5.83002	0.482136	2.7853	1.15617	3.37739	8.06386		54.9765	-0.00985098	-1	0.335744	0.357391	NaN	1.98419	NaN	2.0146		54.9663	-0.0409432	-1	1.4115	0.638426	1.01279	0.418196	1.6676	7.43105
55.4744	0.0956578	-1	0.540843	0.417737	0.579875	0.633305	5.4133	7.85587		55.477	0.120371	1	0.569892	0.702572	1.0655	1.03092	4.60752	9.72473		55.4636	-0.00109373	1	5.23232	0.492498	2.76729	1.09287	3.28681	7.94552		55.4765	-0.0328964	-1	0.35381	0.384065	NaN	1.97337	NaN	1.80042		55.4663	-0.034109	-1	1.41801	0.537457	1.01725	0.41601	1.70724	7.43865
55.9744	0.0771658	-1	0.489194	0.393179	0.548593	0.672193	5.52276	7.94988		55.977	0.123185	1	0.486138	0.667585	1.24889	1.22629	4.66856	9.38151		55.9636	-0.000895174	1	5.08834	0.431412	2.72684	1.04055	3.24104	7.74287		55.9765	-0.0539073	-1	0.406008	0.351831	NaN	1.93551	NaN	1.79982		55.9663	-0.0272156	-1	1.41559	0.43193	1.01655	0.417609	1.71729	7.41551
56.4744	0.0554928	-1	0.44429	0.380361	0.521795	0.68882	5.58215	7.97327		56.477	0.119176	1	0.574069	0.716858	1.39122	1.49634	4.7202	9.13713		56.4636	-0.000669216	1	4.69899	0.380797	2.67826	0.988237	3.2047	7.64823		56.4765	-0.0726474	-1	0.432542	0.346411	NaN	1.90104	NaN	1.82236		56.4663	-0.0190923	-1	1.40849	0.323509	1.01999	0.421667	1.73952	7.35733
56.9744	0.0318858	-1	0.407844	0.385052	0.498531	0.701954	5.59487	7.93215		56.977	0.108689	1	0.78916	0.829815	1.49618	1.80885	4.75728	8.96032		56.9636	-0.000444533	1	4.13503	0.339843	2.62246	0.938629	3.17642	7.63785		56.9765	-0.0887941	-1	0.44499	0.361547	NaN	1.86707	NaN	1.86068		56.9663	-0.0103604	-1	1.39747	0.212665	1.02687	0.427783	1.77195	7.26984
57.4744	0.00725701	-1	0.381569	0.413025	0.477852	0.730366	5.56438	7.83263		57.477	0.0931402	1	1.08689	0.985881	1.56745	2.13159	4.77463	8.8198		57.4636	-0.000339486	1	3.46718	0.30774	2.56032	0.894411	3.15483	7.68798		57.4765	-0.10305	-1	0.454932	0.39098	NaN	1.83072	NaN	1.9074		57.4663	-0.00101591	-1	1.36225	0.200383	1.04326	0.438372	1.79846	7.22371
57.9744	-0.0171058	-1	0.367179	0.470049	0.458809	0.792822	5.49408	7.68081		57.977	0.0733545	1	1.42273	1.16448	1.60871	2.43234	4.76708	8.6843		57.9636	-0.000145667	1	2.76618	0.283678	2.49276	0.85827	3.13855	7.77486		57.9765	-0.112687	1	0.473943	0.428448	NaN	1.78909	NaN	1.95516		57.9663	0.00927552	-1	1.32912	0.196656	1.05835	0.448277	1.83216	7.18384
58.4744	-0.0402069	-1	0.366387	0.561898	0.44045	0.908093	5.38741	7.48281		58.477	0.050326	1	1.75217	1.34504	1.62367	2.67887	4.72947	8.52254		58.4636	7.9569e-05	1	2.10276	0.266849	2.42067	0.832895	3.12622	7.87474		58.4765	-0.117474	1	0.513604	0.467693	NaN	1.7393	NaN	1.99661		58.4663	0.0200151	-1	1.30363	0.197135	1.0695	0.456164	1.88153	7.15123
58.9744	-0.0609671	-1	0.380905	0.694341	0.421827	1.09495	5.24781	7.24474		58.977	0.0251134	1	2.03067	1.50698	1.61601	2.83895	4.65663	8.30325		58.9636	0.000286416	1	1.54766	0.256443	2.34494	0.820975	3.11647	7.96386		58.9765	-0.117302	1	0.58549	0.502456	NaN	1.67846	NaN	2.02437		58.9663	0.0303065	-1	1.29251	0.186323	1.08072	0.464089	1.90767	7.16167
59.4744	-0.0784956	-1	0.412447	0.873151	0.401991	1.37215	5.07869	6.9727		59.477	-0.00171467	1	2.21371	1.62973	1.58942	2.88036	4.54338	7.99514		59.4636	0.000512374	1	1.17162	0.25165	2.26648	0.825196	3.10791	8.01848		59.4765	-0.111882	1	0.701182	0.526477	NaN	1.60367	NaN	2.03109		59.4663	0.0410758	-1	1.28898	0.171847	1.09065	0.47241	1.92442	7.18725
59.9744	-0.0933987	1	0.462726	1.1041	0.37999	1.75847	4.88349	6.67281		59.977	-0.0270358	1	2.25678	1.6927	1.54758	2.77088	4.38456	7.56694		59.9636	0.000737057	1	1.04537	0.251661	2.18618	0.848249	3.09919	8.01484		59.9765	-0.100945	1	0.872256	0.533495	NaN	1.51205	NaN	2.00939		59.9663	0.0511943	-1	1.30159	0.16858	1.08677	0.484679	1.94497	7.18214
60.4744	-0.105303	1	0.581906	1.01507	0.38267	2.20909	5.0204	6.61834		60.477	-0.0499241	1	2.20454	1.77846	1.50908	2.74745	4.26298	7.0539		60.4636	0.000935563	1	1.03631	0.201709	2.12476	0.881272	3.0204	8.07374		60.4765	-0.0845781	1	0.906666	0.489674	NaN	1.37264	NaN	2.15972		60.4663	0.0613931	-1	1.30148	0.15702	1.08194	0.490413	1.95439	7.19728
60.9744	-0.113672	1	0.724124	1.12853	0.377281	2.78271	5.1351	6.49767		60.977	-0.0697508	1	1.835	1.76288	1.58857	2.60973	4.15468	7.15568		60.9636	0.00118022	-1	1.01138	0.172667	2.0417	0.908789	2.96988	8.08314		60.9765	-0.0629382	1	1.22988	0.478984	NaN	1.32759	NaN	2.08458		60.9663	0.0704891	-1	1.28772	0.136553	1.07608	0.489131	1.95186	7.23416
61.4744	-0.117591	1	0.879136	1.28691	0.367535	3.21299	5.20692	6.33553		61.477	-0.0874863	1	1.51351	1.70911	1.60711	2.48876	4.08353	7.21678		61.4636	0.00122414	-1	0.971908	0.150257	1.96394	0.930751	2.93373	8.12283		61.4765	-0.0393525	1	1.50117	0.451869	NaN	1.31595	NaN	2.04464		61.4663	0.078148	-1	1.27854	0.131938	1.06608	0.473325	1.95032	7.23362
61.9744	-0.11598	1	1.04927	1.4766	0.353805	3.53163	5.23925	6.14007		61.977	-0.102429	1	1.23789	1.62569	1.57941	2.38337	4.04465	7.24948		61.9636	0.00109373	-1	0.923081	0.133603	1.89218	0.948745	2.91073	8.18178		61.9765	-0.0148979	1	1.71127	0.413565	NaN	1.33055	NaN	2.03342		61.9663	0.0854476	-1	1.27293	0.130051	1.05475	0.453147	1.9499	7.22059
62.4744	-0.108216	1	1.23684	1.68401	0.336464	3.77032	5.23547	5.91943		62.477	-0.114506	1	1.00598	1.52119	1.52022	2.29237	4.03315	7.26609		62.4636	0.000895174	-1	0.870081	0.121833	1.82715	0.964362	2.89969	8.24894		62.4765	0.00959804	1	1.85091	0.369313	NaN	1.36422	NaN	2.04448		62.4663	0.0924386	-1	1.27525	0.129476	1.04142	0.426704	1.95215	7.1881
62.9744	-0.0954469	1	1.44419	1.89553	0.315885	3.96076	5.19898	5.68174		62.977	-0.121229	1	0.815599	1.40418	1.44425	2.21459	4.04415	7.2789		62.9636	0.000669216	-1	0.81809	0.114072	1.76955	0.97919	2.89938	8.31328		62.9765	0.0333582	1	1.91082	0.324349	NaN	1.40977	NaN	2.07133		62.9663	0.0985418	-1	1.27931	0.140294	1.03551	0.414386	1.95378	7.13842
63.4744	-0.0781129	1	1.67363	2.09756	0.292441	4.13463	5.13315	5.43516		63.477	-0.122444	1	0.664573	1.28322	1.36623	2.14884	4.07275	7.3002		63.4636	0.000444533	-1	0.772288	0.109446	1.72011	0.994818	2.90861	8.36377		63.4765	0.0553185	1	1.88174	0.283912	NaN	1.46003	NaN	2.10752		63.4663	0.103956	-1	1.28441	0.156844	1.0333	0.409529	1.95472	7.08
63.9744	-0.056967	1	1.9275	2.27651	0.266507	4.32362	5.04137	5.18783		63.977	-0.11814	1	0.550729	1.16687	1.3009	2.09396	4.11407	7.3423		63.9636	0.000246027	-1	0.737858	0.107082	1.67953	1.01284	2.92616	8.38938		63.9765	0.0744155	1	1.7544	0.253241	NaN	1.50783	NaN	2.14658		63.9663	0.107388	-1	1.29193	0.172708	1.03037	0.409379	1.94964	7.02147
64.4744	-0.0328216	1	2.20811	2.41878	0.238454	4.55944	4.92703	4.94787		64.477	-0.109149	1	0.471895	1.0637	1.26296	2.04876	4.16323	7.41749		64.4636	9.48286e-05	-1	0.719982	0.106106	1.64853	1.03483	2.95082	8.37906		64.4765	0.0905586	1	1.51952	0.237573	NaN	1.54598	NaN	2.18203		64.4663	0.110495	-1	1.29706	0.21283	1.03424	0.399194	1.99539	6.94998
64.9744	-0.00747157	1	2.5178	2.51075	0.208657	4.87377	4.79351	4.72345		64.977	-0.0941959	-1	0.425896	0.982257	1.26716	2.01205	4.21533	7.53806		64.9636	8.29244e-06	-1	0.723841	0.105644	1.62783	1.0624	2.98138	8.32177		64.9765	0.103276	1	1.16785	0.242147	NaN	1.5673	NaN	2.20742		64.9663	0.113242	-1	1.29933	0.281937	1.04624	0.377018	2.10189	6.86299
65.4744	0.0171811	1	2.54202	2.60722	0.132923	4.87486	4.53047	4.51297		65.477	-0.0739205	-1	0.363547	0.884256	1.25012	2.0033	4.31413	7.80971		65.4636	0	-1	0.772619	0.10152	1.62428	1.03133	2.99587	8.27126		65.4765	0.112224	1	0.821985	0.198425	NaN	1.61113	NaN	2.22947		65.4663	0.114329	-1	1.31653	0.307943	1.0552	0.358927	2.19677	6.79134
65.9744	0.0396244	1	3.05988	2.67868	0.228645	5.56461	4.46976	4.31209		65.977	-0.0494208	-1	0.309397	0.792667	1.19319	1.9615	4.2488	8.05957		65.9636	0.00023692	-1	0.775282	0.114564	1.58289	1.08217	3.02854	8.14569		65.9765	0.117703	1	0.709123	0.285195	NaN	1.60643	NaN	2.17337		65.9663	0.114388	-1	1.33254	0.320755	1.06312	0.345584	2.27578	6.7433
66.4744	0.0602423	1	3.41781	2.76835	0.300037	6.06273	4.38672	4.12464		66.477	-0.0237252	-1	0.259931	0.719097	1.13664	1.91586	4.21069	8.26538		66.4636	0.00043048	-1	0.789313	0.114869	1.54785	1.17778	3.05209	8.05312		66.4765	0.117177	1	0.649108	0.338349	NaN	1.58231	NaN	2.11989		66.4663	0.113758	-1	1.33347	0.315065	1.06933	0.347045	2.30381	6.77245
66.9744	0.0784437	1	3.65349	2.86652	0.34975	6.39864	4.28605	3.94826		66.977	0.00213275	-1	0.216816	0.660746	1.08319	1.86738	4.19293	8.43095		66.9636	0.000576012	-1	0.812019	0.105709	1.51907	1.30011	3.06982	7.98927		66.9765	0.110502	1	0.629482	0.363801	NaN	1.54238	NaN	2.07086		66.9663	0.111062	-1	1.33021	0.291935	1.06391	0.357722	2.26441	6.82689
67.4744	0.0939572	1	3.80458	2.96345	0.380435	6.60181	4.17245	3.78058		67.477	0.0264392	-1	0.181719	0.614813	1.03557	1.81704	4.18863	8.56006		67.4636	0.0006727	-1	0.840708	0.0903566	1.4965	1.43108	3.08507	7.94987		67.4765	0.0986	1	0.63779	0.367468	NaN	1.49026	NaN	2.0281		67.4663	0.108868	-1	1.32399	0.256462	1.05027	0.37492	2.17729	6.89923
67.9744	0.105907	1	3.90878	3.04942	0.394744	6.70166	4.0506	3.61924		67.977	0.0497568	-1	0.156308	0.578495	0.996517	1.76584	4.19093	8.65649		67.9636	0.000723584	-1	0.872686	0.0720833	1.48006	1.55264	3.10113	7.93063		67.9765	0.0820958	1	0.661575	0.355265	NaN	1.4296	NaN	1.99343		67.9663	0.106551	-1	1.31507	0.265444	1.03962	0.385591	2.12431	6.95192
68.4744	0.11369	1	4.00374	3.11472	0.395326	6.72765	3.92521	3.46186		68.477	0.0708975	-1	0.14225	0.548991	0.968756	1.71478	4.19292	8.72406		68.4636	0.000735558	-1	0.90526	0.0541621	1.46968	1.64671	3.12132	7.92727		68.4765	0.0618304	-1	0.688383	0.333106	NaN	1.36401	NaN	1.9687		68.4663	0.102485	-1	1.30009	0.280533	1.0297	0.390507	2.08737	6.97176
68.9744	0.116956	1	4.12715	3.14962	0.384833	6.70921	3.80097	3.30609		68.977	0.0887713	-1	0.141212	0.523501	0.955017	1.66483	4.18775	8.76653		68.9636	0.00071937	-1	0.935738	0.0398655	1.4653	1.69524	3.14896	7.93551		68.9765	0.0387834	-1	0.705756	0.306907	NaN	1.29713	NaN	1.95571		68.9663	0.0981529	-1	1.27408	0.302941	1.02087	0.385308	2.07716	6.93227
69.4744	0.115367	1	4.31669	3.14439	0.365916	6.67579	3.68258	3.14956		69.477	0.103332	-1	0.154861	0.499221	0.958029	1.617	4.16852	8.78771		69.4636	0.000452704	-1	0.961426	0.032466	1.46685	1.68016	3.18735	7.95108		69.4765	0.0131783	-1	0.701239	0.282584	NaN	1.23258	NaN	1.95631		69.4663	0.092967	-1	1.25647	0.304027	1.01961	0.388756	2.09455	6.88757
69.9744	0.108395	1	4.61002	3.08933	0.341225	6.65683	3.57474	2.98989		69.977	0.114005	-1	0.184865	0.473352	0.980524	1.57227	4.12836	8.79139		69.9636	0.000234296	-1	0.979632	0.0352362	1.47426	1.58339	3.23982	7.96969		69.9765	-0.0118337	-1	0.662376	0.266052	NaN	1.17399	NaN	1.97231		69.9663	0.0867625	-1	1.24328	0.296777	1.01939	0.394862	2.12432	6.83225
70.4744	0.0957238	1	4.62333	3.1604	0.340764	6.54221	3.44861	2.81566		70.477	0.120513	-1	0.227126	0.591247	0.7868	1.66391	3.85974	8.89133		70.4636	9.11286e-05	-1	1.03364	0.0398075	1.47438	1.46605	3.26859	7.95602		70.4765	-0.0350722	-1	0.642686	0.271589	NaN	1.14162	NaN	2.00335		70.4663	0.0811878	-1	1.23941	0.283474	1.0094	0.398941	2.17179	6.72236
70.9744	0.0778031	1	4.93255	3.07499	0.328179	6.47935	3.34683	2.71326		70.977	0.123701	-1	0.282617	0.496402	1.02866	1.53733	3.95303	8.76291		70.9636	-5.5596e-06	-1	1.02293	0.0530265	1.52218	1.4652	3.3302	7.94612		70.9765	-0.0559204	-1	0.613223	0.243226	NaN	1.10642	NaN	2.01305		70.9663	0.0740535	-1	1.24781	0.272011	0.994275	0.403237	2.22427	6.6073
71.4744	0.0561343	1	5.05057	3.08338	0.310967	6.39375	3.24789	2.59258		71.477	0.119952	-1	0.332496	0.422355	1.19616	1.45894	3.99686	8.74496		71.4636	-5.64435e-05	-1	1.0003	0.0632339	1.55325	1.47627	3.36972	7.91003		71.4765	-0.0745637	-1	0.579977	0.226909	NaN	1.08157	NaN	2.03638		71.4663	0.0651697	-1	1.26696	0.262157	0.974666	0.407723	2.28113	6.48772
71.9744	0.0322591	1	5.01689	3.15853	0.291183	6.28913	3.15355	2.46044		71.977	0.109632	-1	0.375949	0.367078	1.30452	1.42259	4.00783	8.8186		71.9636	-6.84173e-05	-1	0.9706	0.0713517	1.57059	1.49635	3.39182	7.85763		71.9765	-0.0904862	-1	0.543909	0.220399	NaN	1.06551	NaN	2.06908		71.9663	0.0570884	-1	1.27498	0.263747	0.946575	0.404802	2.27129	6.44639
72.4744	0.0075723	1	4.87103	3.27339	0.270882	6.16922	3.06561	2.32365		72.477	0.0941076	-1	0.412164	0.328544	1.36895	1.42214	4.00256	8.96496		72.4636	-0.000289149	-1	0.93867	0.0783021	1.57723	1.52253	3.40115	7.79882		72.4765	-0.104089	-1	0.505981	0.22146	NaN	1.05665	NaN	2.1069		72.4663	0.0481453	-1	1.2814	0.270799	0.924837	0.399564	2.24429	6.42606
72.9744	-0.0168771	1	4.65249	3.4009	0.252118	6.03776	2.98585	2.18902		72.977	0.0741712	-1	0.440329	0.304724	1.40466	1.45146	3.99766	9.16518		72.9636	-0.000452963	-1	0.909351	0.085007	1.57618	1.5519	3.40241	7.74348		72.9765	-0.113005	-1	0.467154	0.227852	NaN	1.05344	NaN	2.14556		72.9663	0.0388257	-1	1.28627	0.287385	0.917635	0.390686	2.19222	6.43696
73.4744	-0.03999	1	4.40079	3.51402	0.236946	5.89846	2.91605	2.06338		73.477	0.0508676	-1	0.45963	0.293592	1.42687	1.5044	4.00977	9.40038		73.4636	-0.000573648	-1	0.887484	0.0923886	1.57044	1.58155	3.40025	7.7015		73.4765	-0.116999	-1	0.42839	0.23734	NaN	1.05431	NaN	2.1808		73.4663	0.0297344	-1	1.30743	0.335879	0.91964	0.368742	2.18684	6.47094
73.9744	-0.0606366	1	4.15543	3.5857	0.227421	5.75505	2.858	1.95352		73.977	0.0252704	-1	0.469254	0.293119	1.4508	1.57483	4.05548	9.65169		73.9636	-0.0006727	-1	0.87791	0.101369	1.56303	1.60856	3.39936	7.68277		73.9765	-0.115945	-1	0.39065	0.247684	NaN	1.0577	NaN	2.20837		73.9663	0.0197727	-1	1.33104	0.392592	0.925642	0.342006	2.20831	6.5006
74.4744	-0.0784923	1	3.95592	3.5889	0.225598	5.61127	2.81348	1.86627		74.477	-0.0018634	-1	0.468389	0.301279	1.49165	1.6566	4.15142	9.90025		74.4636	-0.000723584	-1	0.885471	0.11287	1.55696	1.63003	3.40439	7.69717		74.4765	-0.110186	-1	0.354897	0.256648	NaN	1.06202	NaN	2.22399		74.4663	0.00947262	-1	1.31994	0.410991	0.934749	0.318523	2.30271	6.41306
74.9744	-0.0933933	1	3.84178	3.49655	0.233531	5.47084	2.78426	1.80844		74.977	-0.0274609	-1	0.456221	0.316042	1.56466	1.74357	4.3142	10.1272		74.9636	-0.000735558	-1	0.915008	0.127814	1.55525	1.64304	3.42003	7.7546		74.9765	-0.0989389	-1	0.322091	0.261994	NaN	1.06573	NaN	2.22342		74.9663	-0.00020633	-1	1.31372	0.40083	0.938103	0.315612	2.37844	6.34357
75.4744	-0.105205	1	3.32574	3.27622	0.245942	5.37906	2.67425	1.76379		75.477	-0.0505579	-1	0.428611	0.335062	1.69554	1.92368	4.60379	10.0247		75.4636	-0.00071937	-1	0.500455	0.13647	1.66673	1.61997	3.38752	7.59874		75.4765	-0.0823072	-1	0.306581	0.236154	NaN	1.04609	NaN	2.21709		75.4663	-0.0107385	-1	1.31294	0.358847	0.935047	0.335621	2.43337	6.29421
75.9744	-0.113742	1	2.75598	3.38319	0.311012	5.1943	2.55963	1.69535		75.977	-0.0704479	-1	0.380141	0.316517	1.79167	1.90649	4.86202	10.2285		75.9636	-0.000606919	-1	1.64582	0.174114	1.91767	1.57971	3.39437	7.65321		75.9765	-0.0609425	-1	0.262591	0.217591	NaN	1.08736	NaN	2.25848		75.9663	-0.0211781	-1	1.28012	0.475633	0.940714	0.311925	2.32555	6.22505
76.4744	-0.117663	1	2.2775	3.4729	0.389258	4.97745	2.52427	1.72715		76.477	-0.088125	-1	0.335723	0.292741	1.83955	1.89285	5.01243	10.3021		76.4636	-0.000528058	-1	2.72272	0.221971	2.14217	1.51113	3.4003	7.64757		76.4765	-0.0376074	-1	0.233657	0.206297	NaN	1.13136	NaN	2.29662		76.4663	-0.0307596	-1	1.23187	0.624784	0.950122	0.280014	2.22193	6.12592
76.9744	-0.115943	1	1.88241	3.53869	0.475641	4.73839	2.5509	1.84422		76.977	-0.103	-1	0.295705	0.265445	1.8526	1.88067	5.08089	10.277		76.9636	-0.000498568	1	3.69449	0.274678	2.33628	1.42295	3.40366	7.59649		76.9765	-0.0132764	-1	0.216061	0.200113	NaN	1.17473	NaN	2.33142		76.9663	-0.04032	-1	1.15353	0.791349	0.966349	0.245384	2.21216	5.94712
77.4744	-0.108561	1	1.56276	3.5739	0.56512	4.48702	2.62224	2.03156		77.477	-0.114912	-1	0.260432	0.236343	1.84421	1.86786	5.09327	10.1845		77.4636	-0.000483031	1	4.52445	0.326871	2.49603	1.32389	3.40282	7.51461		77.4765	0.0106467	-1	0.206085	0.196877	NaN	1.21409	NaN	2.36275		77.4663	-0.0489297	1	1.07715	0.92029	0.973909	0.190584	2.2458	5.63982
77.9744	-0.0958508	-1	1.31066	3.57186	0.652655	4.23323	2.72103	2.27418		77.977	-0.121493	-1	0.230252	0.207148	1.82779	1.85235	5.07544	10.0563		77.9636	-0.000478662	1	5.17591	0.373188	2.61747	1.22266	3.39614	7.41662		77.9765	0.0339219	-1	0.20001	0.194429	NaN	1.24609	NaN	2.39052		77.9663	-0.0559713	1	1.00311	1.018	0.976288	0.130532	2.30883	5.26342
78.4744	-0.0783683	-1	1.11818	3.5259	0.733208	3.98691	2.83	2.55709		78.477	-0.122597	-1	0.205512	0.179571	1.81673	1.83204	5.05329	9.92378		78.4636	-0.000481004	1	5.61221	0.408267	2.69662	1.12798	3.38196	7.31717		78.4765	0.0554611	-1	0.194118	0.190606	NaN	1.26734	NaN	2.41462		78.4663	-0.0628647	1	0.958938	0.868374	0.969272	0.209383	2.50013	4.92945
78.9744	-0.0569304	-1	0.977403	3.42937	0.801737	3.75795	2.93188	2.86531		78.977	-0.11821	-1	0.186557	0.155326	1.82443	1.80485	5.05268	9.81845		78.9636	-0.000486294	1	5.79665	0.426743	2.72952	1.04857	3.35866	7.23093		78.9765	0.0741271	-1	0.184691	0.183249	NaN	1.27448	NaN	2.43493		78.9663	-0.068106	1	0.947921	0.702529	0.966096	0.292282	2.60714	4.66368
79.4744	-0.0324845	-1	0.88041	3.27559	0.853204	3.55623	3.0094	3.18384		79.477	-0.109169	-1	0.173735	0.136126	1.8643	1.7687	5.09949	9.77181		79.4636	-0.000337242	1	5.69258	0.423255	2.71222	0.993139	3.32458	7.17255		79.4765	0.0900879	-1	0.168011	0.170196	NaN	1.26413	NaN	2.45136		79.4663	-0.0723411	1	0.980104	0.515551	0.967922	0.380456	2.6043	4.48679
79.9744	-0.0070222	-1	0.819283	3.05791	0.882567	3.39164	3.04528	3.49771		79.977	-0.0941423	-1	0.167392	0.123683	1.94973	1.72149	5.21959	9.81535		79.9636	-0.00020035	1	5.26331	0.392439	2.64075	0.970414	3.27809	7.15671		79.9765	0.102697	-1	0.140358	0.149285	NaN	1.23293	NaN	2.4638		79.9663	-0.0761873	1	1.00588	0.41225	0.974556	0.4659	2.57892	4.47924
80.4744	0.0175076	-1	0.765902	2.82377	0.931313	3.22996	2.87064	3.90153		80.477	-0.0737386	-1	0.164834	0.142907	1.85877	1.7374	5.20833	9.68919		80.4636	-8.51331e-05	1	4.48953	0.318297	2.46714	0.971078	3.16233	7.25967		80.4765	0.111492	-1	-0.0561664	0.0393884	NaN	1.21003	NaN	2.33555		80.4663	-0.0787147	1	1.02439	0.343556	0.98629	0.53435	2.55249	4.49677
80.9744	0.040202	-1	0.684725	2.65759	0.934608	3.17466	3.11794	4.11048		80.977	-0.0496929	-1	0.220604	0.12484	2.06424	1.68354	5.19127	9.75868		80.9636	-3.98216e-06	1	4.04433	0.282471	2.44214	0.995891	3.17998	7.25144		80.9765	0.117205	-1	0.0927707	0.0613575	NaN	1.16222	NaN	2.44957		80.9663	-0.0801433	1	1.02231	0.334721	1.01223	0.545952	2.53859	4.4799
81.4744	0.0605698	-1	0.609082	2.5181	0.937143	3.1306	3.34483	4.33884		81.477	-0.0241262	-1	0.271702	0.119476	2.10312	1.64664	5.1675	9.78177		81.4636	4.2533e-05	1	3.58367	0.253304	2.40072	1.03545	3.19784	7.28397		81.4765	0.116912	-1	0.172127	0.068275	NaN	1.12393	NaN	2.50332		81.4663	-0.0815422	1	1.02209	0.360105	1.02427	0.556219	2.54943	4.48229
81.9744	0.0783698	-1	0.539139	2.39997	0.93883	3.09128	3.5481	4.58039		81.977	0.00177796	-1	0.31469	0.127227	2.01675	1.62288	5.14225	9.77687		81.9636	5.68493e-05	1	3.12146	0.229665	2.3466	1.08565	3.21367	7.34734		81.9765	0.110324	-1	0.198644	0.06334	NaN	1.09954	NaN	2.50624		81.9663	-0.0814496	1	1.02293	0.406598	1.02769	0.5656	2.57575	4.49598
82.4744	0.09352	-1	0.475065	2.29789	0.939579	3.05022	3.72456	4.82891		82.477	0.0261771	-1	0.346131	0.148503	1.84646	1.60843	5.12076	9.76242		82.4636	0.000200165	1	2.67156	0.210425	2.28349	1.14242	3.22525	7.43164		82.4765	0.0986068	-1	0.189063	0.0497518	NaN	1.09343	NaN	2.46772		82.4663	-0.0806593	1	1.01094	0.428398	1.03454	0.568414	2.61186	4.42774
82.9744	0.105184	-1	0.417028	2.20653	0.939303	3.00093	3.87104	5.07817		82.977	0.0495845	-1	0.362584	0.183718	1.63358	1.59946	5.10828	9.75682		82.9636	0.000315129	1	2.24788	0.194453	2.21512	1.20165	3.23034	7.52693		82.9765	0.0822637	-1	0.160123	0.0307096	NaN	1.10998	NaN	2.39721		82.9663	-0.0790789	1	1.01983	0.431341	1.04261	0.567935	2.64019	4.41871
83.4744	0.112857	-1	0.365196	2.12057	0.937912	2.93692	3.98434	5.32196		83.477	0.0707603	-1	0.360614	0.233281	1.41945	1.59214	5.11005	9.7785		83.4636	0.000406615	1	1.8643	0.180619	2.14519	1.25926	3.22672	7.6233		83.4765	0.0621306	-1	0.128566	0.00941265	NaN	1.15358	NaN	2.30412		83.4663	-0.0765094	1	1.06001	0.406023	1.0525	0.562522	2.65685	4.49844
83.9744	0.116229	-1	0.319737	2.03468	0.935318	2.85171	4.06127	5.55406		83.977	0.0885995	-1	0.336781	0.297605	1.2454	1.58264	5.1313	9.84588		83.9636	0.00048859	1	1.53469	0.167792	2.07742	1.31115	3.21215	7.71083		83.9765	0.0392159	-1	0.111134	-0.0109399	NaN	1.2286	NaN	2.19788		83.9663	-0.0733015	1	1.14251	0.345392	1.08616	0.593782	2.64303	4.6704
84.4744	0.114878	-1	0.280819	1.94355	0.931432	2.73882	4.09865	5.76824		84.477	0.103549	-1	0.287648	0.3771	1.15277	1.56714	5.17728	9.97737		84.4636	0.000535105	-1	1.27295	0.154844	2.01553	1.35324	3.18441	7.77959		84.4765	0.0138869	-1	0.124566	-0.0271489	NaN	1.33943	NaN	2.08789		84.4663	-0.0693035	1	1.24748	0.279317	1.12323	0.671931	2.62314	4.87388
84.9744	0.108259	-1	0.24861	1.84186	0.926166	2.59175	4.09329	5.95828		84.977	0.114237	-1	0.209776	0.472179	1.18288	1.54179	5.25323	10.1914		84.9636	0.000549422	-1	1.09296	0.140644	1.96324	1.38142	3.14126	7.81966		84.9765	-0.0108761	-1	0.185604	-0.0360151	NaN	1.49044	NaN	1.9836		84.9663	-0.0635978	1	1.40245	0.235543	1.14406	0.925431	2.61595	5.10248
85.4744	0.0957375	-1	0.283852	1.73158	0.933013	2.36848	3.89574	6.04402		85.477	0.120573	-1	0.431539	0.330017	1.14534	1.74514	5.43871	9.93344		85.4636	0.000538523	-1	0.975571	0.103978	1.95424	1.41954	3.10067	7.9101		85.4765	-0.0337563	-1	0.14113	-0.0934736	NaN	1.62871	NaN	1.94786		85.4663	-0.057465	1	1.58659	0.174571	1.14118	1.29087	2.61319	5.20433
85.9744	0.0776633	-1	0.20153	1.69791	0.83638	2.38013	4.10868	6.10665		85.977	0.123484	1	0.361629	0.221054	1.06865	2.04675	5.5192	9.76077		85.9636	0.000359725	-1	0.900485	0.110442	1.89506	1.39709	3.11959	7.90663		85.9765	-0.0547823	-1	0.496689	0.459304	NaN	1.79139	NaN	1.84646		85.9663	-0.0503221	1	1.79461	0.0995171	1.11889	1.74796	2.61405	5.2024
86.4744	0.0560555	-1	0.153889	1.66466	0.779687	2.42026	4.3267	6.11202		86.477	0.119527	1	0.653855	0.249419	1.02399	2.33485	5.40796	9.5268		86.4636	0.000197986	-1	0.841134	0.113451	1.84536	1.39671	3.13497	7.91643		86.4765	-0.0736334	-1	0.740498	0.918648	NaN	1.89346	NaN	1.79404		86.4663	-0.0419198	1	2.03557	0.0581399	1.05324	2.2702	2.61529	5.02544
86.9744	0.0323279	-1	0.134798	1.63066	0.755857	2.47506	4.5322	6.07223		86.977	0.109095	1	1.20095	0.385677	1.0036	2.59792	5.1606	9.24725		86.9636	8.51331e-05	-1	0.796212	0.113631	1.80315	1.41331	3.14603	7.93252		86.9765	-0.089744	-1	0.885971	1.28409	NaN	1.94272	NaN	1.78204		86.9663	-0.0331879	1	2.29073	0.0451396	0.992186	2.69302	2.62103	4.84244
87.4744	0.00776053	-1	0.138128	1.5948	0.757812	2.53068	4.70758	5.99939		87.477	0.0940428	1	1.89565	0.600395	0.999703	2.82446	4.83276	8.93782		87.4636	3.98216e-06	-1	0.764415	0.111612	1.76641	1.4418	3.15201	7.94792		87.4765	-0.103394	-1	0.946523	1.55517	NaN	1.94694	NaN	1.8019		87.4663	-0.0234163	1	2.56958	0.0830371	0.944707	2.91739	2.63538	4.66703
87.9744	-0.0165098	-1	0.157749	1.55591	0.778476	2.57331	4.83524	5.90559		87.977	0.0743153	1	2.63069	0.864141	1.00454	3.00296	4.48007	8.61421		87.9636	-4.2533e-05	-1	0.744436	0.108022	1.73314	1.47711	3.15212	7.95566		87.9765	-0.112454	-1	0.935571	1.73141	NaN	1.91391	NaN	1.84507		87.9663	-0.0129767	1	2.82431	0.081794	0.910348	3.12531	2.62897	4.51023
88.4744	-0.0394605	-1	0.187529	1.51286	0.810772	2.58911	4.89759	5.80296		88.477	0.0510519	1	3.29881	1.14748	1.01036	3.12192	4.15816	8.29213		88.4636	-5.68493e-05	-1	0.73497	0.103489	1.70134	1.51416	3.14559	7.94877		88.4765	-0.116666	-1	0.86653	1.81234	NaN	1.85139	NaN	1.90298		88.4663	-0.0021062	1	3.06933	0.0736221	0.882034	3.29896	2.61959	4.36216
88.9744	-0.0599267	-1	0.221338	1.46452	0.847624	2.56424	4.87703	5.70358		88.977	0.0253846	1	3.79272	1.42098	1.00938	3.16983	3.92267	7.98728		88.9636	-4.59506e-05	-1	0.734712	0.0986406	1.66901	1.54786	3.13165	7.92026		88.9765	-0.115903	-1	0.752815	1.79751	NaN	1.76718	NaN	1.96708		88.9663	0.00943226	1	3.30692	0.111612	0.862802	3.28498	2.63937	4.228
89.4744	-0.0775537	-1	0.253047	1.40973	0.881954	2.48489	4.75597	5.61958		89.477	-0.00178348	1	4.00518	1.6552	0.993851	3.13518	3.82922	7.71537		89.4636	-2.13671e-05	-1	0.742357	0.0941059	1.63413	1.57312	3.10953	7.86317		89.4765	-0.11011	-1	0.607842	1.68645	NaN	1.66906	NaN	2.02881		89.4663	0.02103	1	3.44528	0.138432	0.809657	3.43345	2.66289	4.10671
89.9744	-0.0925629	-1	0.276526	1.34736	0.906685	2.33722	4.51679	5.56304		89.977	-0.0274107	1	3.82892	1.82072	0.956005	3.00645	3.93344	7.4921		89.9636	8.24274e-07	-1	0.7566	0.0905128	1.59471	1.58488	3.07846	7.77052		89.9765	-0.0988813	-1	0.445027	1.47868	NaN	1.56479	NaN	2.07961		89.9663	0.0321079	1	3.49191	0.154927	0.725158	3.73211	2.68989	3.99732
90.4744	-0.104567	-1	0.307985	1.41738	0.888414	2.3254	4.62827	5.54143		90.477	-0.0504061	1	3.32389	1.76045	0.938553	2.76258	4.07072	6.91989		90.4636	0	-1	0.758593	0.0668815	1.54931	1.65162	3.09016	7.74344		90.4765	-0.0823508	-1	0.407844	1.40696	NaN	1.42288	NaN	2.1129		90.4663	0.0434265	1	3.39992	0.273532	0.661674	3.66838	2.78554	4.04808
90.9744	-0.113385	-1	0.259203	1.28789	0.914523	2.24979	4.33081	5.54806		90.977	-0.0706968	1	2.88894	1.84102	0.853599	2.59973	4.2226	7.36592		90.9636	-2.73286e-16	-1	0.787712	0.0786316	1.53185	1.62705	3.09657	7.73283		90.9765	-0.0612156	-1	0.34902	1.33293	NaN	1.36652	NaN	2.13035		90.9663	0.053524	1	3.24661	0.393142	0.604567	3.48462	2.8737	4.17449
91.4744	-0.117608	-1	0.24433	1.20733	0.935304	2.19737	4.13713	5.55953		91.477	-0.0884053	1	2.51076	1.8457	0.785698	2.45245	4.32813	7.64761		91.4636	0	-1	0.804265	0.0890203	1.5169	1.59859	3.1059	7.71374		91.4765	-0.0379889	-1	0.300168	1.26841	NaN	1.31237	NaN	2.15922		91.4663	0.063503	1	2.97525	0.491269	0.558189	3.09112	2.92735	4.44913
91.9744	-0.115963	-1	0.254834	1.16453	0.948607	2.16196	4.04044	5.57684		91.977	-0.103132	1	2.1821	1.78969	0.732246	2.32138	4.39508	7.79058		91.9636	0	-1	0.809585	0.0992023	1.50244	1.57097	3.11779	7.68994		91.9765	-0.0137363	-1	0.26092	1.21287	NaN	1.26026	NaN	2.19539		91.9663	0.0722522	1	2.73791	0.558541	0.561672	2.51099	2.95863	4.77338
92.4744	-0.108322	-1	0.282184	1.14834	0.952283	2.13737	4.03396	5.60095		92.477	-0.114789	1	1.89571	1.68816	0.690639	2.20716	4.43125	7.82047		92.4636	2.73286e-16	-1	0.805005	0.110332	1.4864	1.54892	3.13191	7.66517		92.4765	0.0104784	-1	0.230908	1.16577	NaN	1.20996	NaN	2.23473		92.4663	0.0792938	1	2.51856	0.610318	0.589627	1.83682	2.97683	5.12043
92.9744	-0.0954678	-1	0.317849	1.14761	0.94418	2.11743	4.11091	5.63286		92.977	-0.121237	1	1.64434	1.55629	0.658272	2.11042	4.44442	7.76291		92.9636	2.73286e-16	-1	0.791859	0.123565	1.46676	1.53715	3.14792	7.64319		92.9765	0.0340181	-1	0.209763	1.12657	NaN	1.1613	NaN	2.2731		92.9663	0.0859761	1	2.29449	0.684499	0.568794	1.29126	2.97069	5.3845
93.4744	-0.0779088	-1	0.353299	1.15116	0.92215	2.09596	4.2645	5.67354		93.477	-0.122372	1	1.42073	1.40928	0.632543	2.0318	4.44238	7.64352		93.4636	5.46571e-16	-1	0.771478	0.140055	1.44145	1.54039	3.16548	7.62777		93.4765	0.0557772	-1	0.197117	1.09474	NaN	1.11407	NaN	2.30637		93.4663	0.09202	1	2.11328	0.649126	0.552334	0.925241	2.9195	5.58661
93.9744	-0.0565163	-1	0.380001	1.14785	0.884041	2.06676	4.48796	5.72397		93.977	-0.118225	1	1.21763	1.26231	0.610847	1.97194	4.43293	7.48794		93.9636	5.46571e-16	-1	0.745198	0.160957	1.40845	1.56337	3.18424	7.62265		93.9765	0.0746228	-1	0.192602	1.06975	NaN	1.06808	NaN	2.33042		93.9663	0.0970836	1	1.9873	0.47261	0.541507	0.790536	2.81027	5.7089
94.4744	-0.0320428	-1	0.389425	1.12652	0.827703	2.02367	4.77449	5.78513		94.477	-0.109422	-1	1.0278	1.13057	0.590579	1.93149	4.42384	7.3218		94.4636	5.46571e-16	-1	0.71435	0.187425	1.3657	1.6108	3.20387	7.6316		94.4765	0.0906687	-1	0.195849	1.05107	NaN	1.02312	NaN	2.34111		94.4663	0.101479	1	1.89326	0.321833	0.532594	0.694531	2.76389	5.7908
94.9744	-0.00654797	-1	0.37304	1.07601	0.750987	1.9605	5.11732	5.85801		94.977	-0.0946257	-1	0.84397	1.02923	0.569137	1.91107	4.4229	7.17073		94.9636	5.46571e-16	-1	0.680268	0.220615	1.31117	1.68742	3.22401	7.65836		94.9765	0.103275	-1	0.206491	1.03816	NaN	0.979008	NaN	2.33432		94.9663	0.104134	1	1.82083	0.177397	0.530734	0.624093	2.73645	5.85938
95.4744	0.017939	-1	0.44958	1.31036	0.675318	1.88408	5.66953	5.85287		95.477	-0.0743617	-1	0.681046	0.936019	0.559061	1.87842	4.3765	7.00911		95.4636	5.46571e-16	-1	0.699446	0.18106	1.26423	1.7125	3.22565	7.63949		95.4765	0.112063	-1	0.180575	1.08387	NaN	0.975382	NaN	2.31059		95.4663	0.105541	1	1.80261	0.0371923	0.55263	0.617131	2.73167	5.90934
95.9744	0.040554	-1	0.352009	0.97206	0.591367	1.76839	5.60898	5.93921		95.977	-0.0502253	-1	0.599902	0.860638	0.54449	1.89018	4.45419	7.31312		95.9636	2.73286e-16	-1	0.696771	0.168194	1.24112	1.76873	3.24017	7.65011		95.9765	0.117363	-1	0.348782	1.06002	NaN	1.03064	NaN	2.23728		95.9663	0.106501	-1	1.75027	0.111072	0.574552	0.600927	2.81183	5.88729
96.4744	0.061346	-1	0.294599	0.74025	0.531521	1.65943	5.58481	6.014		96.477	-0.0245866	-1	0.528086	0.794908	0.550865	1.87801	4.49274	7.54825		96.4636	0	-1	0.705014	0.15803	1.22008	1.81736	3.25426	7.64628		96.4765	0.116825	-1	0.515209	1.06092	NaN	1.06934	NaN	2.16599		96.4663	0.106011	-1	1.67508	0.328269	0.596491	0.578535	2.94885	5.81703
96.9744	0.0796167	-1	0.269515	0.596448	0.492103	1.55719	5.58394	6.0762		96.977	0.0012612	-1	0.465355	0.738327	0.572278	1.84965	4.49958	7.72958		96.9636	2.73286e-16	-1	0.721264	0.151674	1.20092	1.86139	3.26715	7.63076		96.9765	0.110107	-1	0.669798	1.07929	NaN	1.0934	NaN	2.09906		96.9663	0.10473	-1	1.59301	0.450603	0.596296	0.502358	2.94724	5.72533
97.4744	0.0952194	-1	0.268926	0.522168	0.469438	1.46169	5.59327	6.12475		97.477	0.0256226	-1	0.411467	0.690398	0.602822	1.81288	4.48219	7.87218		97.4636	0	-1	0.742607	0.150233	1.18348	1.9038	3.27806	7.6063		97.4765	0.0982562	-1	0.802496	1.10788	NaN	1.10476	NaN	2.03882		97.4663	0.102782	-1	1.51084	0.515344	0.596931	0.437153	2.93117	5.6465
97.9744	0.107133	-1	0.284999	0.498925	0.459848	1.37292	5.59973	6.15862		97.977	0.0489483	-1	0.366181	0.650621	0.63659	1.77543	4.44803	7.9911		97.9636	-2.73286e-16	-1	0.766128	0.154814	1.16759	1.94759	3.28622	7.57567		97.9765	0.0817132	-1	0.903247	1.13944	NaN	1.10533	NaN	1.98762		97.9663	0.0994258	-1	1.42858	0.490903	0.599037	0.389503	2.89361	5.58794
98.4744	0.114801	-1	0.309899	0.508234	0.459659	1.2909	5.59021	6.17676		98.477	0.0700159	-1	0.329255	0.618498	0.667673	1.74509	4.40454	8.10142		98.4636	-2.73286e-16	-1	0.788916	0.166524	1.15307	1.99577	3.29085	7.54162		98.4765	0.0613209	-1	0.961996	1.16672	NaN	1.09704	NaN	1.94779		98.4663	0.0956809	-1	1.3672	0.504456	0.584739	0.331051	2.767	5.55442
98.9744	0.117925	-1	0.335795	0.531609	0.465194	1.21564	5.55164	6.17811		98.977	0.0877445	-1	0.300447	0.593529	0.690165	1.72959	4.3592	8.2182		98.9636	-5.46571e-16	-1	0.808055	0.18647	1.13975	2.05131	3.29118	7.50691		98.9765	0.0380996	-1	0.968687	1.18244	NaN	1.0818	NaN	1.92168		98.9663	0.0923249	-1	1.31135	0.531182	0.566929	0.278757	2.63736	5.53083
99.4744	0.116086	-1	0.354854	0.550564	0.472777	1.14713	5.47093	6.16163		99.477	0.10244	-1	0.279516	0.575217	0.698159	1.73671	4.31946	8.3565		99.4636	-2.73286e-16	-1	0.820634	0.215758	1.12747	2.11721	3.28642	7.4743		99.4765	0.0125059	-1	0.913265	1.17937	NaN	1.06154	NaN	1.91162		99.4663	0.0874305	-1	1.25414	0.570265	0.554197	0.270352	2.61204	5.52139
99.9744	0.108755	-1	0.359241	0.546615	0.478732	1.0854	5.33498	6.12627		99.977	0.113135	-1	0.266218	0.56306	0.685746	1.77419	4.29278	8.53141		99.9636	-2.73286e-16	-1	0.823738	0.255497	1.11604	2.19647	3.27581	7.44654		99.9765	-0.0125976	-1	0.785675	1.15024	NaN	1.03819	NaN	1.91996		99.9663	0.0817162	-1	1.2028	0.645341	0.538495	0.252266	2.57415	5.50635
100.474	0.0957749	-1	0.393206	0.478917	0.444857	1.03557	5.29655	6.07191		100.477	0.119822	-1	0.330567	0.597694	0.670024	1.87198	4.41946	8.74159		100.464	-2.73286e-16	-1	0.809774	0.277206	1.09046	2.3391	3.31236	7.4551		100.477	-0.035738	-1	0.643094	1.02934	NaN	1.01924	NaN	1.93747		100.466	0.074903	-1	1.17397	0.858467	0.511399	0.197051	2.48811	5.46987
100.974	0.077391	-1	0.355875	0.463209	0.474126	1.03259	5.1935	6.06513		100.977	0.123254	1	0.355794	0.62583	0.73414	2.03003	4.48428	8.83035		100.964	0	-1	0.803825	0.292681	1.09609	2.276	3.30998	7.41589		100.977	-0.0562936	-1	0.563641	1.00309	NaN	0.97251	NaN	1.96111		100.966	0.0672107	-1	1.16604	0.851417	0.482813	0.167876	2.52403	5.4602
101.474	0.0555334	-1	0.323	0.455466	0.48981	1.02182	5.13069	6.05543		101.477	0.119809	1	0.450089	0.734702	0.761031	2.21975	4.56941	8.81606		101.464	-2.73286e-16	-1	0.802088	0.294986	1.09493	2.24241	3.30603	7.39619		101.477	-0.0746723	-1	0.489657	0.968549	NaN	0.930069	NaN	1.98261		101.466	0.0596579	-1	1.17188	0.699166	0.453244	0.155875	2.64039	5.46822
101.974	0.0317114	-1	0.296586	0.452347	0.496973	1.00771	5.10209	6.03876		101.977	0.109828	1	0.590312	0.90107	0.760408	2.42322	4.66501	8.71866		101.964	0	-1	0.802568	0.287599	1.08958	2.23219	3.3003	7.38842		101.977	-0.0903273	-1	0.422371	0.92745	NaN	0.891704	NaN	2.00372		101.966	0.0517162	-1	1.19417	0.515603	0.436213	0.19665	2.68115	5.47845
102.474	0.00713516	-1	0.278639	0.45051	0.50068	0.994699	5.10166	6.01111		102.477	0.0949359	1	0.753326	1.10169	0.74198	2.62254	4.76124	8.55807		102.464	2.73286e-16	-1	0.803269	0.274	1.08265	2.23921	3.29258	7.38498		102.477	-0.103506	-1	0.363012	0.881534	NaN	0.857205	NaN	2.02616		102.466	0.0422743	-1	1.20973	0.309838	0.422056	0.247805	2.74134	5.48026
102.974	-0.0172672	-1	0.271165	0.446612	0.505997	0.98724	5.12337	5.96846		102.977	0.0753725	1	0.915993	1.31332	0.715457	2.79979	4.84825	8.35422		102.964	5.46571e-16	-1	0.802195	0.257666	1.07675	2.25733	3.28268	7.37828		102.977	-0.112281	-1	0.312808	0.832544	NaN	0.826362	NaN	2.05167		102.966	0.0332719	-1	1.21454	0.0693311	0.412319	0.314864	2.83287	5.46875
103.474	-0.0403738	-1	0.276168	0.437312	0.517986	0.989779	5.16119	5.90678		103.477	0.0522352	1	1.05518	1.51273	0.69055	2.93706	4.91621	8.12705		103.464	2.73286e-16	-1	0.797352	0.242075	1.0745	2.28041	3.27039	7.36074		103.477	-0.116345	-1	0.272988	0.782221	NaN	0.798962	NaN	2.08197		103.466	0.0236905	-1	1.19795	0.0220261	0.410231	0.358693	2.86857	5.45611
103.974	-0.0610467	-1	0.295653	0.419267	0.541713	1.00676	5.20908	5.82206		103.977	0.0266058	1	1.14773	1.67666	0.676967	3.01644	4.95527	7.89647		103.964	5.46571e-16	-1	0.786743	0.230705	1.07849	2.30232	3.25551	7.32474		103.977	-0.115561	-1	0.244781	0.732306	NaN	0.774796	NaN	2.11881		103.966	0.0138004	-1	1.1701	0.0605517	0.411752	0.385861	2.88779	5.43849
104.474	-0.0788263	-1	0.331627	0.389135	0.582243	1.04264	5.26101	5.71026		104.477	-0.000665651	1	1.17053	1.78188	0.684421	3.02003	4.95559	7.68243		104.464	5.46571e-16	-1	0.768373	0.227034	1.09134	2.3169	3.23783	7.26272		104.477	-0.110325	-1	0.229415	0.684541	NaN	0.753652	NaN	2.1639		104.466	0.00396949	-1	1.11686	0.253327	0.420379	0.364425	2.90193	5.39873
104.974	-0.0937874	-1	0.386093	0.343575	0.644641	1.10186	5.31095	5.56738		104.977	-0.02637	1	1.10043	1.80514	0.72262	2.92991	4.90733	7.50484		104.964	5.46571e-16	-1	0.740246	0.23454	1.11566	2.31804	3.21715	7.16707		104.977	-0.0993881	-1	0.22812	0.640667	NaN	0.73532	NaN	2.21899		104.966	-0.00616141	-1	1.09366	0.423358	0.426406	0.322203	2.93438	5.339
105.474	-0.105771	-1	0.449934	0.245782	0.714926	1.17354	5.37928	5.47805		105.477	-0.0494656	1	0.865196	2.07292	0.837462	2.88296	5.08159	7.72466		105.464	8.19857e-16	-1	1.35775	0.256879	1.05329	2.19292	3.16919	7.012		105.477	-0.0828517	-1	0.189785	0.564068	NaN	0.761448	NaN	2.24409		105.466	-0.0168418	-1	1.09384	0.575676	0.430407	0.263795	2.98109	5.26372
105.974	-0.114635	1	0.476718	0.236631	0.822106	1.23569	5.4485	5.4292		105.977	-0.0698166	1	0.709723	1.64985	0.903999	2.60794	4.65128	7.35383		105.964	2.73286e-16	-1	0.658374	0.234998	1.15897	2.36356	3.23876	7.17195		105.977	-0.0617627	-1	0.24794	0.589794	NaN	0.689341	NaN	2.2879		105.966	-0.0268838	-1	1.14837	0.554017	0.412091	0.266893	2.97257	5.08828
106.474	-0.118587	1	0.485446	0.230054	0.913386	1.25605	5.48172	5.40636		106.477	-0.0877343	1	0.575984	1.31576	0.897343	2.39696	4.37015	7.10224		106.464	2.73286e-16	-1	0.655905	0.245371	1.25676	2.44036	3.27104	7.23306		106.477	-0.0381987	-1	0.265501	0.596502	NaN	0.654611	NaN	2.3083		106.466	-0.0370443	-1	1.24028	0.463716	0.391104	0.30281	2.95968	4.88986
106.974	-0.116743	1	0.480012	0.224894	0.989813	1.2448	5.48441	5.40265		106.977	-0.102805	1	0.461938	1.05894	0.836678	2.24017	4.21225	6.95615		106.964	2.73286e-16	-1	1.18329	0.280817	1.35369	2.44181	3.26994	7.21093		106.977	-0.0135177	-1	0.262633	0.598654	NaN	0.651345	NaN	2.30801		106.966	-0.0464738	-1	1.4053	0.249727	0.367526	0.400965	2.94519	4.65606
107.474	-0.109056	1	0.464313	0.219994	1.05244	1.21212	5.46204	5.4112		107.477	-0.11493	-1	0.365543	0.867675	0.741191	2.1277	4.15162	6.9018		107.464	-2.73286e-16	-1	2.07347	0.334156	1.45679	2.38642	3.23936	7.12114		107.477	0.0105219	-1	0.2595	0.61071	NaN	0.673627	NaN	2.28973		107.466	-0.0544156	-1	1.59383	0.0758594	0.336424	0.561897	2.92604	4.41314
107.974	-0.0961688	1	0.442242	0.214195	1.1023	1.16818	5.42007	5.42512		107.977	-0.12174	-1	0.284756	0.730278	0.630066	2.04969	4.16232	6.92544		107.964	0	1	3.1594	0.398207	1.57307	2.29268	3.18321	6.97931		107.977	0.0339399	-1	0.276269	0.647131	NaN	0.715542	NaN	2.25618		107.966	-0.0621079	1	1.79042	-0.0522927	0.303402	0.766721	2.90796	4.16893
108.474	-0.0786499	1	0.417695	0.206341	1.14045	1.12317	5.36396	5.43754		108.477	-0.123113	-1	0.217538	0.63504	0.52249	1.99628	4.2184	7.01331		108.464	0	1	4.27402	0.46579	1.70956	2.1791	3.10538	6.80102		108.477	0.0555369	-1	0.333103	0.722378	NaN	0.771177	NaN	2.21006		108.466	-0.0688494	1	1.97066	0.0798998	0.28157	1.12959	2.91728	3.94761
108.974	-0.0572933	1	0.394565	0.195273	1.16793	1.08726	5.29919	5.44159		108.977	-0.119065	-1	0.161845	0.570259	0.437647	1.95761	4.29389	7.15168		108.964	0	1	5.25028	0.529724	1.87327	2.06417	3.00979	6.60186		108.977	0.074129	1	0.450168	0.850913	NaN	0.834617	NaN	2.1541		108.966	-0.0741031	1	2.13964	0.317558	0.243726	1.44205	2.92538	3.7238
109.474	-0.0327865	1	0.376749	0.179834	1.1858	1.07063	5.23121	5.43038		109.477	-0.110133	-1	0.115637	0.524233	0.394724	1.92381	4.36284	7.32677		109.464	2.73286e-16	1	5.92113	0.582829	2.07124	1.96638	2.90033	6.39745		109.477	0.0901167	1	0.64763	1.0472	NaN	0.899946	NaN	2.091		109.466	-0.0784949	1	2.29672	0.666759	0.188946	1.70117	2.93217	3.49736
109.974	-0.00739714	1	0.36814	0.158866	1.1951	1.08347	5.16549	5.39704		109.977	-0.0951741	-1	0.0768711	0.485258	0.412905	1.88503	4.39931	7.52485		109.964	2.73286e-16	1	6.11951	0.617924	2.31049	1.90425	2.78092	6.20336		109.977	0.102601	1	0.945652	1.32569	NaN	0.96125	NaN	2.02348		109.966	-0.0813693	1	2.39921	1.02364	0.143301	1.9257	2.89568	3.26409
110.474	0.0171123	1	0.348398	0.158374	1.19506	1.18314	5.40661	5.42874		110.477	-0.0747769	-1	-0.0131088	0.474573	0.445179	1.84376	4.33639	7.89608		110.464	2.73286e-16	1	5.43938	0.662811	2.46125	1.86982	2.70823	6.18871		110.477	0.111428	1	1.12348	1.55167	NaN	0.967527	NaN	1.96		110.466	-0.0833263	1	2.47445	1.30695	0.107234	2.08357	2.85573	3.06475
110.974	0.0399243	1	0.320738	0.270953	1.16747	1.27044	5.60649	5.43339		110.977	-0.0502939	-1	0.0620448	0.418172	0.473333	1.82064	4.33762	7.70977		110.964	1.82274e-05	1	5.13201	0.729966	2.72933	1.84369	2.69429	5.99608		110.977	0.117251	1	1.53096	1.79632	NaN	0.949157	NaN	1.87092		110.966	-0.0852747	1	2.49736	1.39454	0.0930869	2.0787	2.82194	2.95685
111.474	0.0606843	1	0.322393	0.353539	1.16395	1.33257	5.74573	5.43133		111.477	-0.02448	-1	0.0974983	0.381822	0.505011	1.78533	4.31799	7.68527		111.464	2.12001e-05	1	4.82913	0.820958	2.93091	1.79759	2.67503	5.80531		111.477	0.117133	1	1.75789	1.94475	NaN	0.909166	NaN	1.80768		111.466	-0.0858834	1	2.52026	1.48214	0.07894	2.07383	2.78814	2.84895
111.974	0.0790144	1	0.346904	0.407633	1.17952	1.37275	5.82893	5.42337		111.977	0.00147916	-1	0.104043	0.36161	0.538055	1.74093	4.28673	7.78019		111.964	1.15928e-05	1	4.53647	0.927019	3.07943	1.73544	2.64928	5.61686		111.977	0.110712	1	1.83322	2.01146	NaN	0.851987	NaN	1.76798		111.966	-0.0854229	1	2.53491	1.51089	0.0860744	2.07561	2.74673	2.70135
112.474	0.0949147	1	0.387812	0.43474	1.20923	1.39419	5.86067	5.41034		112.477	0.0260591	-1	0.0924721	0.353625	0.570312	1.69056	4.25307	7.95211		112.464	-4.9361e-06	1	4.25976	1.03938	3.1883	1.66115	2.61588	5.43119		112.477	0.0992911	1	1.7859	2.011	NaN	0.782052	NaN	1.74951		112.466	-0.0842227	1	2.54007	1.47206	0.117654	2.08502	2.69657	2.50812
112.974	0.107076	1	0.438658	0.436364	1.24812	1.40011	5.84554	5.39306		112.977	0.0495989	-1	0.0735761	0.353957	0.599627	1.63734	4.22623	8.15865		112.964	-1.97445e-05	1	4.00473	1.14928	3.27094	1.57865	2.57367	5.24878		112.977	0.0829509	1	1.64487	1.95789	NaN	0.703796	NaN	1.74996		112.966	-0.0813742	1	2.51352	1.44747	0.145398	2.0565	2.64686	2.32613
113.474	0.114964	1	0.492983	0.414007	1.29121	1.39372	5.78814	5.37233		113.477	0.0708923	-1	0.0581472	0.358694	0.623844	1.58437	4.21543	8.3574		113.464	-2.12065e-05	1	3.77711	1.24795	3.34076	1.49184	2.5215	5.07006		113.477	0.0625999	1	1.43908	1.86665	NaN	0.62165	NaN	1.76704		113.466	-0.077828	1	2.48237	1.40405	0.170215	2.01522	2.59776	2.15614
113.974	0.118232	1	0.544329	0.369175	1.33355	1.37823	5.69304	5.34899		113.977	0.0888826	-1	0.0569771	0.363925	0.640809	1.53476	4.22991	8.50595		113.964	5.28739e-06	1	3.58262	1.32662	3.41119	1.40466	2.45821	4.89552		113.977	0.0392799	-1	1.19747	1.75181	NaN	0.540048	NaN	1.79845		113.966	-0.0737917	1	2.45345	1.29677	0.188174	1.95483	2.55032	2.0165
114.474	0.116382	1	0.586237	0.30337	1.37018	1.35688	5.56484	5.32384		114.477	0.10361	-1	0.0808578	0.365738	0.648366	1.49163	4.27889	8.56191		114.464	5.91031e-05	1	3.427	1.37653	3.49564	1.32102	2.38262	4.72561		114.477	0.0137776	-1	0.948991	1.62789	NaN	0.463424	NaN	1.84186		114.466	-0.0684454	1	2.41583	1.24255	0.180794	1.89594	2.50463	1.82422
114.974	0.109104	1	0.612248	0.218097	1.39613	1.33287	5.40813	5.29771		114.977	0.114257	-1	0.140581	0.360223	0.64436	1.45809	4.37159	8.48289		114.964	0.0001943	1	3.31597	1.3889	3.60754	1.24483	2.29359	4.56078		114.977	-0.0111637	-1	0.722578	1.50943	NaN	0.39621	NaN	1.89499		114.966	-0.0624014	1	2.37304	1.21593	0.159973	1.83772	2.46014	1.60366
115.474	0.0959967	1	0.93299	0.258613	1.43177	1.17435	5.09115	5.19638		115.477	0.120706	-1	0.311078	0.441156	0.651914	1.37674	4.71831	8.44892		115.464	0.000431763	1	3.28683	1.4148	3.57432	1.22445	2.19162	4.32813		115.477	-0.0340048	-1	0.572446	1.34716	NaN	0.325916	NaN	1.9842		115.466	-0.056108	1	2.32072	1.13524	0.157594	1.77458	2.42227	1.41108
115.974	0.0776828	1	0.715108	0.0748825	1.41522	1.20413	4.99194	5.15649		115.977	0.123445	1	0.268445	0.351478	0.717253	1.33533	5.0125	8.40009		115.964	0.000448292	1	3.23695	1.38861	3.83805	1.12848	2.14348	4.21225		115.977	-0.0556556	-1	0.469125	1.33121	NaN	0.350958	NaN	1.98261		115.966	-0.0489059	1	2.26359	1.09301	0.156463	1.71343	2.38403	1.22754
116.474	0.0556719	1	0.638109	0.0457624	1.40139	1.20216	5.04983	5.11347		116.477	0.119439	1	0.369889	0.365193	0.85681	1.30913	5.06393	8.26082		116.464	0.0004631	1	3.24251	1.36795	4.03985	1.03612	2.09212	4.07214		116.477	-0.0746719	-1	0.39752	1.30881	NaN	0.380552	NaN	1.97937		116.466	-0.0417038	1	2.19932	1.10776	0.157182	1.65521	2.34523	1.05741
116.974	0.0314252	1	0.669087	0.132702	1.38932	1.174	5.21252	5.06808		116.977	0.109106	1	0.586191	0.471463	1.05277	1.2919	4.93508	8.0516		116.964	0.000464562	1	3.28115	1.34985	4.18113	0.949669	2.04006	3.92022		116.977	-0.0907697	-1	0.352687	1.27995	NaN	0.412807	NaN	1.97423		116.966	-0.0335509	1	2.1149	1.13027	0.16566	1.59672	2.30985	0.996914
117.474	0.00616304	1	0.775141	0.297152	1.37808	1.12521	5.42772	5.02107		117.477	0.0938619	1	0.888134	0.659448	1.28733	1.27736	4.68843	7.79292		117.464	0.000419841	1	3.3305	1.33139	4.26327	0.871395	1.9898	3.76888		117.477	-0.1041	-1	0.32968	1.24465	NaN	0.445833	NaN	1.96691		117.466	-0.0239991	1	2.02781	1.17495	0.172949	1.53864	2.27289	0.970378
117.974	-0.0187962	1	0.923367	0.500561	1.36672	1.06137	5.64316	4.97319		117.977	0.0741654	1	1.2465	0.91831	1.54268	1.25925	4.38648	7.50527		117.964	0.000344825	1	3.36821	1.30961	4.28764	0.803577	1.94385	3.63054		117.977	-0.113037	-1	0.323555	1.20292	NaN	0.477741	NaN	1.95716		117.966	-0.0141386	1	1.95317	1.31883	0.164513	1.483	2.22382	0.971296
118.474	-0.042319	1	1.08086	0.70438	1.35428	0.988025	5.80653	4.92519		118.477	0.0510746	1	1.63207	1.23721	1.80099	1.23134	4.0917	7.20914		118.464	0.000216263	1	3.37192	1.28157	4.25565	0.748495	1.9047	3.51759		118.477	-0.117341	1	0.329368	1.15476	NaN	0.506641	NaN	1.94473		118.466	-0.00314963	1	1.88591	1.43113	0.158053	1.4281	2.15788	0.964125
118.974	-0.0632209	1	1.21472	0.87006	1.33983	0.910754	5.86555	4.87781		118.977	0.0256472	1	2.01564	1.60531	2.04448	1.18734	3.86658	6.92503		118.964	4.9361e-06	1	3.31927	1.24432	4.16867	0.708426	1.87487	3.44245		118.977	-0.116913	1	0.342174	1.10017	NaN	0.530643	NaN	1.92935		118.966	0.00862963	1	1.82435	1.51902	0.15312	1.37376	2.07889	0.950701
119.474	-0.0814859	1	1.29204	0.959049	1.32243	0.835119	5.76794	4.83182		119.477	-0.00117906	1	2.36797	2.01177	2.25531	1.12101	3.77361	6.67342		119.464	1.97445e-05	1	3.1879	1.19491	4.02809	0.685649	1.85687	3.41753		119.477	-0.11088	1	0.357029	1.03917	NaN	0.547856	NaN	1.91076		119.466	0.0193989	1	1.75478	1.56815	0.144965	1.30777	2.00135	0.949763
119.974	-0.0964369	1	1.27993	0.932797	1.30111	0.766683	5.4614	4.78796		119.977	-0.0266554	1	2.65986	2.44574	2.41569	1.02609	3.87526	6.47481		119.964	2.12065e-05	1	2.95545	1.13039	3.8353	0.682442	1.85318	3.45523		119.977	-0.0995095	1	0.368988	0.971762	NaN	0.556391	NaN	1.88871		119.966	0.0307892	1	1.65784	1.55754	0.141643	1.24792	1.92231	0.941159
120.474	-0.107888	1	1.16823	0.970822	1.33214	0.653685	5.0502	4.67031		120.477	-0.0497918	1	2.48046	2.55446	2.42029	1.04228	3.77856	6.46168		120.464	-5.28739e-06	1	2.7134	1.13687	3.70375	0.825904	1.85876	3.53355		120.477	-0.082748	1	0.51839	0.969541	NaN	0.572991	NaN	1.90019		120.466	0.0418375	1	1.50601	1.42998	0.148412	1.20231	1.84038	0.916136
120.974	-0.115706	1	1.08074	0.755974	1.28086	0.693147	4.93158	4.66945		120.977	-0.0703549	1	2.15804	2.46348	2.3628	0.984179	3.60007	6.41235		120.964	-5.91031e-05	1	2.39119	1.00285	3.5087	0.722395	1.91491	3.75543		120.977	-0.0618909	1	0.497073	0.897109	NaN	0.596719	NaN	1.87019		120.966	0.0525857	1	1.36226	1.3661	0.147023	1.19378	1.78105	0.932047
121.474	-0.118755	1	0.978056	0.62981	1.25522	0.711682	4.83058	4.68317		121.477	-0.0884644	1	1.853	2.2758	2.30729	0.940024	3.47393	6.43259		121.464	-0.0001943	1	2.1405	0.893442	3.36314	0.68527	1.94537	3.9764		121.477	-0.0385728	1	0.567202	0.834265	NaN	0.631028	NaN	1.85418		121.466	0.0625054	1	1.25854	1.33488	0.147822	1.17688	1.72268	0.93284
121.974	-0.116117	1	0.868577	0.570448	1.24954	0.714102	4.75385	4.70383		121.977	-0.103619	1	1.56838	2.01972	2.25515	0.909139	3.39414	6.51144		121.964	-0.000431763	1	1.94211	0.804037	3.25668	0.699555	1.95789	4.19626		121.977	-0.0141794	1	0.698656	0.782276	NaN	0.670837	NaN	1.84967		121.966	0.0710768	1	1.17841	1.32327	0.149161	1.15544	1.66428	0.927508
122.474	-0.108234	1	0.760712	0.55601	1.25816	0.70522	4.70805	4.72375		122.477	-0.11553	1	1.30717	1.72356	2.20775	0.890849	3.35472	6.63791		122.464	-0.000448292	-1	1.77679	0.730032	3.17887	0.750276	1.96021	4.41484		122.477	0.0107864	1	0.861316	0.742408	NaN	0.71106	NaN	1.85416		122.466	0.0791581	1	1.14894	1.35871	0.140954	1.12979	1.59751	0.948806
122.974	-0.0950742	1	0.662866	0.564613	1.27539	0.689851	4.69982	4.73527		122.977	-0.12219	1	1.07238	1.41562	2.16647	0.884478	3.34967	6.80105		122.964	-0.0004631	-1	1.62533	0.666824	3.11931	0.82246	1.96007	4.63193		122.977	0.0347857	1	1.02506	0.715928	NaN	0.746613	NaN	1.86514		122.966	0.0869096	1	1.1391	1.39958	0.133215	1.09378	1.54422	0.948773
123.474	-0.0772845	1	0.583448	0.574379	1.29557	0.672807	4.7358	4.73074		123.477	-0.123446	1	0.867034	1.12421	2.13269	0.88935	3.37302	6.98989		123.464	-0.000464562	-1	1.4685	0.609809	3.06757	0.901132	1.96524	4.84734		123.477	0.0567115	1	1.15977	0.704103	NaN	0.772414	NaN	1.88012		123.466	0.0924004	1	1.15311	1.44705	0.126045	1.04515	1.50732	0.922793
123.974	-0.0557462	1	0.530865	0.563425	1.31303	0.658903	4.82264	4.70249		123.977	-0.119283	1	0.694126	0.877634	2.10779	0.904792	3.41876	7.19345		123.964	-0.000438068	-1	1.28708	0.554384	3.01322	0.971319	1.98344	5.06088		123.977	0.0754686	1	1.23533	0.7082	NaN	0.783378	NaN	1.89659		123.966	0.0974343	1	1.19911	1.46042	0.116758	1.03405	1.45801	0.909093
124.474	-0.0312277	1	0.513523	0.509871	1.3221	0.652952	4.96699	4.64286		124.477	-0.110073	1	0.556671	0.704197	2.09314	0.930128	3.48091	7.40078		124.464	-0.000366025	-1	1.06184	0.495945	2.94586	1.01805	2.02243	5.27235		124.477	0.0916172	1	1.22161	0.729486	NaN	0.774421	NaN	1.91206		124.466	0.101061	1	1.25605	1.46638	0.108523	1.02576	1.40993	0.893028
124.974	-0.0057826	1	0.53983	0.391838	1.31709	0.659766	5.17549	4.54419		124.977	-0.0950197	1	0.457678	0.632209	2.09012	0.964682	3.55349	7.60089		124.964	-0.000227856	-1	0.773567	0.42989	2.85505	1.02635	2.08996	5.48158		124.977	0.10415	1	1.0885	0.769228	NaN	0.74046	NaN	1.92402		124.966	0.103009	1	1.32915	1.46876	0.104875	1.00447	1.37305	0.862246
125.474	0.0187594	1	0.720094	0.366759	1.2945	0.671041	5.30038	4.48539		125.477	-0.0746904	-1	0.319495	0.555605	2.10759	0.972249	3.49404	7.46822		125.464	2.73286e-16	-1	0.552178	0.358933	2.81061	1.11912	2.11242	5.67064		125.477	0.113063	1	1.05226	0.758947	NaN	0.82133	NaN	1.89662		125.466	0.104078	1	1.3967	1.49915	0.106385	0.980861	1.32682	0.844263
125.974	0.041536	1	0.593744	0.266487	1.17855	0.704846	5.61477	4.4369		125.977	-0.0500807	-1	0.320655	0.539003	2.06676	0.988626	3.63161	7.82753		125.964	0.000119698	-1	0.518183	0.331409	2.71632	1.02837	2.17766	5.83142		125.977	0.118021	1	0.882638	0.593371	NaN	0.868238	NaN	1.8324		125.966	0.104446	1	1.46041	1.54564	0.110898	0.955421	1.27562	0.833381
126.474	0.0620882	1	0.625957	0.22889	1.08239	0.816322	5.79506	4.42407		126.477	-0.0241715	-1	0.321244	0.506902	2.07411	1.00243	3.80198	8.07744		126.464	9.50577e-05	-1	0.504586	0.304722	2.62459	0.977861	2.23629	5.95935		126.477	0.117333	1	0.802613	0.510018	NaN	1.0062	NaN	1.75432		126.466	0.103584	1	1.47509	1.58004	0.11628	0.891975	1.25916	0.797852
126.974	0.0800072	1	0.798509	0.245262	1.00338	0.990224	5.86376	4.43357		126.977	0.00189604	-1	0.321455	0.462887	2.11782	1.01467	3.9958	8.2394		126.964	-1.69004e-05	-1	0.504562	0.27899	2.53597	0.96024	2.28895	6.06044		126.977	0.110596	1	0.787699	0.498206	NaN	1.21033	NaN	1.66775		126.966	0.102726	1	1.48372	1.62046	0.122716	0.838107	1.23972	0.767
127.474	0.0952782	1	1.09318	0.306896	0.938863	1.21131	5.84337	4.45207		127.477	0.0267817	-1	0.32148	0.410544	2.18606	1.02637	4.20372	8.33486		127.464	-0.000169366	-1	0.511285	0.254333	2.45097	0.96817	2.33627	6.14074		127.477	0.0991326	1	0.813414	0.547253	NaN	1.45578	NaN	1.57806		127.466	0.100068	1	1.48293	1.67029	0.130799	0.79918	1.2156	0.743447
127.974	0.106883	1	1.49174	0.405087	0.886207	1.46433	5.75638	4.46622		127.977	0.0504963	-1	0.321512	0.353459	2.26701	1.03853	4.4164	8.38529		127.964	-0.000325736	-1	0.517929	0.230871	2.37013	0.994311	2.37888	6.20627		127.977	0.0827641	1	0.855276	0.646479	NaN	1.71768	NaN	1.49062		127.966	0.0969193	1	1.46647	1.68204	0.153305	0.765579	1.23325	0.729725
128.474	0.114307	1	1.97598	0.531129	0.842769	1.73404	5.6253	4.46271		128.477	0.0718733	-1	0.321745	0.295218	2.34884	1.05219	4.62448	8.41215		128.464	-0.000459618	-1	0.517669	0.208722	2.29396	1.03132	2.41741	6.26306		128.476	0.0623846	1	0.888801	0.785203	NaN	1.97115	NaN	1.41081		128.466	0.0944807	1	1.44884	1.71811	0.180519	0.736319	1.25947	0.722539
128.974	0.117224	1	2.52766	0.676316	0.805906	2.00519	5.47262	4.4282		128.977	0.0898803	-1	0.322371	0.239405	2.41971	1.06835	4.81862	8.43689		128.964	-0.000554828	-1	0.503678	0.188007	2.22301	1.07186	2.45249	6.31714		128.976	0.0390032	1	0.889506	0.952743	NaN	2.19133	NaN	1.34399		128.966	0.0905839	1	1.44597	1.91649	0.210991	0.720364	1.27163	0.733046
129.474	0.11565	1	3.12857	0.831942	0.772977	2.26255	5.32084	4.34935		129.477	0.10412	-1	0.323583	0.189607	2.46781	1.08802	4.98948	8.48097		129.464	-0.000725088	-1	0.469133	0.168845	2.15778	1.10858	2.48477	6.37454		129.476	0.013205	1	0.832909	1.13842	NaN	2.35335	NaN	1.29553		129.466	0.0853388	1	1.44747	2.0893	0.252672	0.716318	1.31087	0.73082
129.974	0.108678	1	3.76049	0.989302	0.741341	2.49086	5.19247	4.21284		129.977	0.114451	-1	0.325575	0.149409	2.4813	1.11223	5.1277	8.56585		129.964	-0.000710597	-1	0.407205	0.151354	2.09881	1.13415	2.51486	6.44128		129.976	-0.0119051	1	0.694527	1.33155	NaN	2.43234	NaN	1.27081		129.966	0.0810359	1	1.45227	2.24288	0.302782	0.721228	1.37046	0.719019
130.474	0.0959839	1	5.65778	1.13806	0.71111	2.6854	5.04079	3.97263		130.477	0.120739	-1	0.247318	0.123525	2.22658	1.1153	5.31826	8.76761		130.464	-0.000582816	-1	0.35432	0.138508	2.0036	1.16041	2.54158	6.55887		130.476	-0.0348185	1	0.931641	1.35302	NaN	2.51761	NaN	1.22512		130.466	0.0747511	1	1.47739	2.4918	0.347341	0.716135	1.37258	0.70083
130.974	0.0783319	1	5.11314	1.22726	0.658996	2.85009	5.00623	3.80272		130.977	0.123522	-1	0.41316	0.110166	2.51477	1.1449	5.33517	8.7667		130.964	-0.000430351	-1	0.4714	0.144118	1.92529	1.23183	2.57435	6.57851		130.976	-0.0559352	1	1.10992	1.37678	NaN	2.63925	NaN	1.2397		130.966	0.068217	1	1.51896	2.70392	0.402973	0.711872	1.3743	0.684806
131.474	0.0567814	1	4.61378	1.329	0.606504	2.9647	4.94094	3.62967		131.477	0.119494	-1	0.520742	0.103877	2.69797	1.15246	5.3708	8.76503		131.464	-0.000273981	-1	0.496991	0.131693	1.84217	1.29601	2.62227	6.62654		131.476	-0.0745939	1	1.47201	1.41152	NaN	2.69734	NaN	1.21646		131.466	0.0609938	1	1.5887	2.84431	0.478754	0.70971	1.37886	0.67305
131.974	0.0328754	1	4.16138	1.44143	0.554619	3.03926	4.84985	3.45578		131.977	0.109096	1	0.582627	0.102389	2.78379	1.14651	5.41861	8.76249		131.964	-0.000140099	-1	0.467281	0.106976	1.76258	1.358	2.67989	6.68935		131.976	-0.0904873	1	1.9482	1.45156	NaN	2.70082	NaN	1.16606		131.966	0.0526002	1	1.69856	3.04674	0.552418	0.693732	1.35152	0.669998
132.474	0.00837681	1	3.75762	1.56273	0.504328	3.0838	4.73791	3.28331		132.477	0.0932984	1	0.61138	0.103433	2.77979	1.13563	5.47205	8.759		132.464	-0.000164587	-1	0.418459	0.0757077	1.69487	1.42284	2.74178	6.75334		132.476	-0.103924	1	2.46878	1.49125	NaN	2.65861	NaN	1.09913		132.466	0.0439485	1	1.81406	3.2556	0.626323	0.673556	1.32132	0.66658
132.974	-0.0159958	1	3.40418	1.69104	0.456616	3.10836	4.61004	3.11454		132.977	0.0732259	1	0.619567	0.104743	2.69357	1.12836	5.52456	8.75449		132.964	-8.93843e-05	-1	0.386712	0.0436317	1.64736	1.49556	2.8025	6.80492		132.976	-0.112886	1	2.96407	1.52491	NaN	2.57963	NaN	1.02633		132.966	0.0351573	1	1.87729	3.36731	0.706793	0.655467	1.34421	0.640574
133.474	-0.0390641	1	3.10274	1.82453	0.412471	3.12295	4.47118	2.95177		133.477	0.0499019	1	0.619753	0.104049	2.53272	1.13325	5.5696	8.74886		133.464	3.27226e-05	-1	0.40823	0.0164896	1.6284	1.58122	2.85662	6.83048		133.476	-0.117142	-1	3.36435	1.54688	NaN	2.47279	NaN	0.958302		133.466	0.0242361	1	1.93263	3.58401	0.784483	0.616631	1.28518	0.626725
133.974	-0.0596346	1	2.85497	1.96136	0.372877	3.13761	4.32627	2.79725		133.977	0.0243377	1	0.624502	0.0990836	2.30481	1.15888	5.60062	8.74202		133.964	0.000169366	-1	0.519199	2.34717e-05	1.64634	1.68485	2.89871	6.81644		133.976	-0.116621	-1	3.59992	1.55149	NaN	2.34702	NaN	0.905686		133.966	0.0140966	1	1.97965	3.91158	0.859238	0.555889	1.13965	0.625712
134.474	-0.0777944	1	2.66255	2.09969	0.338822	3.16236	4.18024	2.65329		134.477	-0.0028097	1	0.646379	0.0875789	2.01745	1.21378	5.61106	8.7339		134.464	0.000325736	-1	0.755809	-2.44297e-05	1.7095	1.8115	2.92333	6.74918		134.476	-0.111108	-1	3.60109	1.53308	NaN	2.21123	NaN	0.879129		134.466	0.00387684	1	2.00395	4.23344	0.958097	0.493087	1.00448	0.627471
134.974	-0.0927203	1	2.52716	2.23768	0.311291	3.20722	4.03802	2.52215		134.977	-0.0282658	1	0.697949	0.0672668	1.6782	1.30651	5.59438	8.72441		134.964	0.000459618	-1	1.15425	0.022088	1.82623	1.96619	2.92505	6.61511		134.976	-0.0999905	-1	3.29815	1.48598	NaN	2.07436	NaN	0.889278		134.966	-0.00782215	1	2.03007	4.53587	1.05239	0.436441	0.876534	0.635652
135.474	-0.104377	1	2.50608	2.38861	0.283441	3.35152	3.94628	2.34478		135.477	-0.0512035	1	0.687873	0.0220357	1.41746	1.35688	5.7338	8.68232		135.464	0.000554828	1	0.813316	-0.0248976	1.90044	1.98113	2.95237	6.29178		135.476	-0.0834182	-1	2.80991	1.42098	NaN	1.99402	NaN	0.837742		135.466	-0.0188198	1	2.0736	4.77982	1.11986	0.400321	0.766079	0.662727
135.974	-0.113109	1	2.26766	2.53665	0.265416	3.34872	3.83523	2.25381		135.977	-0.0709588	1	0.627948	-0.0247246	1.3257	1.4347	5.58864	8.83903		135.964	0.000725088	1	2.52607	0.192405	2.16825	2.08117	2.92327	6.28347		135.976	-0.0618917	-1	2.39774	1.34538	NaN	1.89387	NaN	1.10138		135.966	-0.0290099	1	2.11712	5.02376	1.18732	0.364201	0.655624	0.689802
136.474	-0.11709	1	2.04206	2.66429	0.248115	3.36538	3.73182	2.16363		136.477	-0.0883976	1	0.556877	-0.0530994	1.29046	1.4643	5.46365	8.88552		136.464	0.000710597	1	3.70518	0.384736	2.38338	2.06957	2.90751	6.24836		136.476	-0.0382384	-1	2.05322	1.27809	NaN	1.81736	NaN	1.32676		136.466	-0.0394495	1	2.18425	5.20806	1.27487	0.351684	0.609463	0.710618
136.974	-0.115381	1	1.8336	2.7731	0.231437	3.39895	3.63429	2.07384		136.977	-0.103106	1	0.479597	-0.0649482	1.30146	1.45392	5.35917	8.84398		136.964	0.000582816	1	4.43459	0.554381	2.55609	1.97321	2.89935	6.18554		136.976	-0.0137652	-1	1.76714	1.21835	NaN	1.75839	NaN	1.51667		136.966	-0.0483086	1	2.26713	5.35256	1.37581	0.354915	0.606201	0.727257
137.474	-0.108466	1	1.64659	2.86464	0.21528	3.44685	3.5409	1.98401		137.477	-0.115069	1	0.40104	-0.062131	1.34843	1.4118	5.27553	8.73662		137.464	0.000430351	1	4.79825	0.703626	2.69666	1.81894	2.89305	6.09413		137.476	0.0105007	-1	1.53031	1.16543	NaN	1.71091	NaN	1.67393		137.466	-0.0568504	1	2.29352	5.55092	1.46991	0.354239	0.588795	0.758709
137.974	-0.0960662	1	1.48535	2.94047	0.199541	3.50652	3.44991	1.89373		137.977	-0.121701	1	0.326142	-0.0465074	1.42109	1.34619	5.21307	8.58566		137.964	0.000273981	1	4.88012	0.834756	2.81535	1.63362	2.88286	5.97325		137.976	0.0340659	-1	1.33352	1.11857	NaN	1.66882	NaN	1.80133		137.966	-0.0647625	1	2.30391	5.74586	1.56606	0.354536	0.584382	0.784233
138.474	-0.0788317	1	1.3542	3.00215	0.184119	3.57539	3.35957	1.80259		138.477	-0.122908	1	0.259837	-0.0199371	1.50915	1.26531	5.17211	8.41329		138.464	0.000140099	1	4.76414	0.950058	2.92243	1.4441	2.86304	5.82199		138.476	0.0558128	-1	1.16757	1.07705	NaN	1.62606	NaN	1.9017		138.466	-0.0704051	1	2.2879	5.93473	1.66567	0.356491	0.60181	0.799737
138.974	-0.0576065	1	1.25744	3.05124	0.168912	3.65091	3.26813	1.71016		138.977	-0.118684	-1	0.20706	0.0157201	1.60233	1.17741	5.153	8.24173		138.964	4.48891e-05	1	4.53427	1.05182	3.02817	1.27726	2.82786	5.63949		138.976	0.0746814	-1	1.02326	1.04011	NaN	1.57654	NaN	1.97782		138.966	-0.0754897	1	2.19088	6.11895	1.79393	0.353832	0.620176	0.805954
139.474	-0.0332509	1	1.1994	3.0893	0.153818	3.73051	3.17385	1.61604		139.477	-0.109487	-1	0.172745	0.0586045	1.69037	1.09073	5.15607	8.09317		139.464	-5.6734e-06	1	4.27445	1.14232	3.14283	1.15993	2.77157	5.42485		139.476	0.0904794	-1	0.891394	1.00702	NaN	1.5142	NaN	2.03252		139.466	-0.0802828	1	2.06305	6.27794	1.92839	0.350934	0.639643	0.807032
139.974	-0.00793059	1	1.18439	3.1179	0.138735	3.81162	3.07499	1.5198		139.977	-0.0945	-1	0.161827	0.106856	1.76298	1.01352	5.18164	7.98984		139.964	-1.58222e-05	1	4.06865	1.22385	3.27669	1.119	2.68842	5.17718		139.976	0.102914	1	0.762769	0.977026	NaN	1.43294	NaN	2.06858		139.966	-0.0833387	1	1.89875	6.30556	2.04982	0.354304	0.663628	0.79508
140.474	0.0164401	1	1.08397	3.24124	0.12803	3.847	3.02303	1.43096		140.477	-0.0741819	-1	1.10144	0.277049	1.84801	1.02559	5.06055	8.08684		140.464	2.73286e-16	1	3.8857	1.30195	3.32012	1.03674	2.58951	4.91326		140.476	0.11186	1	0.673545	0.96885	NaN	1.38733	NaN	2.11362		140.466	-0.0861662	1	1.73948	6.28576	2.15276	0.363751	0.692687	0.781827
140.974	0.039953	1	1.19063	3.26545	0.126133	4.03982	2.92939	1.36845		140.977	-0.0492827	-1	0.56951	0.295936	1.89256	0.992481	5.29286	8.27994		140.964	2.73286e-16	1	3.86938	1.36536	3.4675	0.999359	2.48157	4.74062		140.976	0.117605	1	0.581314	0.942627	NaN	1.3435	NaN	2.10773		140.966	-0.0873923	1	1.58461	6.22451	2.23952	0.378509	0.726182	0.767437
141.474	0.060852	1	1.26373	3.27379	0.124765	4.19427	2.86067	1.31163		141.477	-0.023447	-1	0.262571	0.293539	1.96748	1.06866	5.44038	8.37898		141.464	2.73286e-16	1	3.84207	1.40348	3.58679	0.947544	2.40722	4.58093		141.476	0.117464	1	0.583044	0.902819	NaN	1.31455	NaN	2.08866		141.466	-0.0868304	1	1.43471	6.20575	2.32717	0.378598	0.733774	0.760499
141.974	0.0790049	1	1.32464	3.27578	0.123249	4.31558	2.81173	1.25911		141.977	0.00242805	-1	0.169126	0.285668	2.05702	1.22818	5.51481	8.39684		141.964	2.73286e-16	1	3.80248	1.42077	3.67533	0.884761	2.35758	4.43224		141.976	0.111265	1	0.649176	0.853722	NaN	1.29503	NaN	2.0618		141.966	-0.0860612	1	1.30239	6.18534	2.41317	0.376537	0.742316	0.749609
142.474	0.0945039	1	1.39471	3.28093	0.120912	4.40896	2.77743	1.20953		142.477	0.0270669	-1	0.277675	0.288133	2.14542	1.44513	5.5279	8.34641		142.464	0	1	3.74932	1.42174	3.73044	0.814472	2.3238	4.29261		142.476	0.0997279	1	0.750156	0.799631	NaN	1.27949	NaN	2.03256		142.466	-0.0844215	1	1.20629	6.15449	2.49559	0.37235	0.757105	0.729167
142.974	0.106377	1	1.49533	3.29876	0.11708	4.47963	2.75261	1.16148		142.977	0.0505598	-1	0.576719	0.316742	2.21692	1.69355	5.49136	8.24059		142.964	0	1	3.68129	1.41085	3.74945	0.740143	2.29699	4.16009		142.976	0.0834965	1	0.856425	0.744842	NaN	1.26246	NaN	2.00634		142.966	-0.0814544	1	1.10927	6.15803	2.56447	0.354389	0.753822	0.725258
143.474	0.114145	1	1.64784	3.33878	0.111078	4.5328	2.73215	1.11358		143.477	0.0718068	1	1.05476	0.387305	2.25577	1.94751	5.41691	8.09226		143.464	0	1	3.5971	1.39261	3.72969	0.665236	2.26828	4.03273		143.476	0.0634083	1	0.938426	0.69365	NaN	1.23848	NaN	1.98853		143.466	-0.0781577	1	1.01609	6.17449	2.62197	0.332309	0.74368	0.728513
143.974	0.117505	1	1.87363	3.4105	0.102231	4.57369	2.71089	1.06446		143.977	0.0897659	1	1.70029	0.515633	2.24621	2.18108	5.31627	7.91432		143.964	0	1	3.49545	1.37148	3.66849	0.593216	2.22881	3.90858		143.976	0.0404029	1	0.966605	0.650352	NaN	1.2021	NaN	1.98455		143.966	-0.0732805	1	0.957372	6.18399	2.63072	0.321702	0.736708	0.736155
144.474	0.115559	1	2.19406	3.52344	0.089865	4.60753	2.68369	1.01271		144.477	0.104056	1	2.50183	0.717533	2.17248	2.36833	5.20117	7.71966		144.464	0	1	3.37504	1.35196	3.56318	0.527546	2.16971	3.7857		144.476	0.0148912	1	0.911403	0.619242	NaN	1.14786	NaN	1.99979		144.466	-0.0675662	1	0.901344	6.19704	2.65342	0.308688	0.751281	0.746514
144.974	0.108474	1	2.63048	3.68711	0.0733058	4.63952	2.64541	0.956958		144.977	0.114591	1	3.44786	1.00882	2.01883	2.4833	5.08333	7.52118		144.964	0	1	3.23459	1.33853	3.41108	0.471691	2.0821	3.66213		144.976	-0.0101221	1	0.743264	0.604616	NaN	1.0703	NaN	2.03966		144.966	-0.0624817	1	0.84824	6.21394	2.69126	0.29306	0.789252	0.759823
145.474	0.0957106	1	2.90913	3.76536	0.0769811	4.7107	2.60558	0.906394		145.477	0.120998	1	5.36932	1.32973	1.9799	2.70084	5.05	7.43321		145.464	2.73286e-16	1	3.1352	1.25321	3.23936	0.462171	2.0179	3.5445		145.476	-0.0333584	1	0.542435	0.57749	NaN	1.04802	NaN	1.95685		145.466	-0.0559561	1	0.811986	6.24377	2.73269	0.284365	0.810948	0.771488
145.974	0.0773109	1	3.06006	3.81102	0.0751228	4.87518	2.5279	0.867027		145.977	0.124059	1	4.97882	1.75263	1.72674	2.78139	4.9276	6.96512		145.964	2.73286e-16	1	3.07193	1.21267	3.12911	0.446827	1.92881	3.40841		145.976	-0.0543949	1	0.675134	0.547857	NaN	1.04927	NaN	1.93317		145.966	-0.0483441	1	0.784435	6.26318	2.76987	0.280583	0.840081	0.783524
146.474	0.0555436	1	3.13926	3.86498	0.070289	4.9818	2.45913	0.828195		146.477	0.12022	1	4.55091	2.17759	1.52048	2.90619	4.86837	6.55951		146.464	0	1	3.0178	1.15203	3.02458	0.437071	1.8689	3.34844		146.476	-0.0732957	1	0.880233	0.548639	NaN	1.04196	NaN	1.92179		146.466	-0.040411	1	0.775552	6.24589	2.79287	0.288445	0.898418	0.797377
146.974	0.0317599	1	3.1616	3.92194	0.0633188	5.03874	2.39806	0.789423		146.977	0.109846	1	4.10289	2.59132	1.35439	3.0607	4.85392	6.20804		146.964	0	1	2.96678	1.07694	2.92634	0.432266	1.83419	3.35097		146.976	-0.0895863	1	1.12337	0.571853	NaN	1.02638	NaN	1.92296		146.966	-0.0311592	1	0.784877	6.16642	2.76266	0.292205	0.928603	0.825053
147.474	0.00667448	1	3.14193	3.9766	0.0550516	5.05418	2.34349	0.750239		147.477	0.0939555	1	3.65209	2.98049	1.22172	3.23036	4.86589	5.90238		147.464	2.73286e-16	1	2.91282	0.993064	2.83496	0.431776	1.82066	3.40238		147.476	-0.103499	1	1.3702	0.609517	NaN	1.00282	NaN	1.93689		147.466	-0.0217803	1	0.804088	6.05378	2.70478	0.293328	0.943323	0.859451
147.974	-0.0179694	1	3.09513	4.02365	0.0463265	5.03627	2.29422	0.710168		147.977	0.0738495	1	3.21583	3.3318	1.11574	3.40063	4.88594	5.63417		147.964	2.73286e-16	1	2.84987	0.906047	2.75101	0.434964	1.82433	3.48906		147.976	-0.112851	1	1.58635	0.653649	NaN	0.971587	NaN	1.96382		147.966	-0.0121396	1	0.820125	5.96572	2.68443	0.285612	0.958704	0.873213
148.474	-0.0411752	1	3.03605	4.05778	0.0379829	4.99319	2.24903	0.668737		148.477	0.0505357	1	2.81143	3.63192	1.0297	3.55695	4.89568	5.39508		148.464	2.73286e-16	1	2.77191	0.821543	2.67506	0.441193	1.84119	3.5974		148.476	-0.117362	1	1.73746	0.696267	NaN	0.932971	NaN	2.00397		148.466	-0.000660396	1	0.82723	5.94001	2.66142	0.274616	0.964335	0.886072
148.974	-0.0618567	1	2.97956	4.0737	0.0308601	4.93312	2.20672	0.625471		148.977	0.0250688	1	2.4562	3.86756	0.956855	3.68479	4.87676	5.17676		148.964	2.73286e-16	1	2.67288	0.745206	2.60769	0.449828	1.86725	3.71378		148.976	-0.11691	1	1.78919	0.729388	NaN	0.887266	NaN	2.05757		148.966	0.0103965	1	0.822048	6.00006	2.63476	0.259111	0.956556	0.89769
149.474	-0.0794661	1	2.94053	4.06611	0.0257972	4.86423	2.16608	0.579897		149.477	-0.00216526	1	2.16748	4.0254	0.890466	3.76959	4.81082	4.97088		149.464	2.73286e-16	1	2.54675	0.682688	2.54946	0.460231	1.89852	3.82458		149.476	-0.111467	1	1.70716	0.745031	NaN	0.83477	NaN	2.12485		149.466	0.0209163	1	0.791368	6.09414	2.59354	0.304568	0.958173	0.904373
149.974	-0.0943515	1	2.93382	4.02969	0.0236336	4.79468	2.12591	0.531541		149.977	-0.0277046	1	1.96257	4.09212	0.82379	3.7968	4.67948	4.76909		149.964	5.46571e-16	1	2.38747	0.639642	2.50094	0.471766	1.93098	3.9162		149.976	-0.100497	1	1.45702	0.735212	NaN	0.775777	NaN	2.20603		149.966	0.0319139	1	0.757881	6.18684	2.53843	0.373388	0.951636	0.905851
150.474	-0.106168	1	3.17042	3.7454	0.0209703	4.64552	1.89223	0.484908		150.477	-0.0507135	1	1.66039	4.1424	0.810327	3.80661	4.47167	4.48553		150.464	5.46571e-16	1	1.81775	0.7397	2.40882	0.362351	1.76664	4.07142		150.476	-0.0842495	1	1.11336	0.724446	NaN	0.734363	NaN	2.32821		150.466	0.0421461	1	0.738704	6.23812	2.43807	0.480394	0.899881	0.889832
150.974	-0.114232	1	2.79952	3.82307	0.0210658	4.71852	1.98255	0.453644		150.977	-0.0703811	1	1.46245	4.102	0.696819	3.74511	4.47168	4.24005		150.964	5.46571e-16	1	1.80402	0.642862	2.40783	0.497973	1.90183	4.09437		150.976	-0.0623095	1	0.91487	0.676452	NaN	0.687796	NaN	2.38186		150.966	0.0523066	1	0.720024	6.28245	2.34211	0.552673	0.808909	0.876296
151.474	-0.117874	1	2.48149	3.84149	0.0204042	4.77722	1.99136	0.429389		151.477	-0.0879993	1	1.29489	4.06066	0.632131	3.68068	4.50057	4.03394		151.464	5.46571e-16	1	1.76197	0.572828	2.39501	0.581816	1.989	4.14172		151.476	-0.0386198	-1	0.747303	0.636565	NaN	0.654605	NaN	2.4229		151.466	0.0626956	1	0.701732	6.32139	2.24956	0.597976	0.687471	0.864689
151.974	-0.115942	1	2.21281	3.80809	0.0193473	4.82314	1.93462	0.410576		151.977	-0.102896	1	1.1505	4.01039	0.605031	3.60959	4.54058	3.86232		151.964	0	1	1.69986	0.5271	2.37229	0.629635	2.03756	4.20863		151.976	-0.0141493	-1	0.608102	0.603387	NaN	0.63247	NaN	2.45421		151.966	0.0709459	1	0.678977	6.38444	2.24392	0.588946	0.574799	0.797568
152.474	-0.108114	1	1.98997	3.73034	0.0182565	4.85778	1.82828	0.395638		152.477	-0.115183	1	1.02209	3.94318	0.604291	3.52814	4.57398	3.72032		152.464	0	1	1.62592	0.503181	2.34158	0.657186	2.05689	4.29025		152.476	0.0101366	-1	0.494705	0.575518	NaN	0.619075	NaN	2.47867		152.466	0.0784185	1	0.668013	6.4459	2.26406	0.561453	0.494163	0.734761
152.974	-0.0952516	1	1.80945	3.61566	0.0174937	4.88268	1.6883	0.383009		152.977	-0.122011	1	0.902477	3.85106	0.618678	3.43263	4.58302	3.60309		152.964	0	1	1.54841	0.498574	2.3048	0.680224	2.05639	4.38173		152.976	0.0338761	-1	0.404552	0.551561	NaN	0.6121	NaN	2.49915		152.966	0.0856292	1	0.679087	6.50241	2.32438	0.504537	0.471667	0.684486
153.474	-0.0778128	1	1.66772	3.47152	0.0174204	4.89935	1.53065	0.37112		153.477	-0.123271	1	0.784456	3.72601	0.636963	3.31932	4.54996	3.50574		153.464	0	1	1.47555	0.510781	2.26388	0.714504	2.04547	4.47823		153.476	0.0560149	-1	0.335081	0.530118	NaN	0.609228	NaN	2.51853		153.466	0.0920621	1	0.702204	6.41043	2.42453	0.512706	0.524497	0.633252
153.974	-0.0565939	1	1.56129	3.30535	0.0183983	4.9093	1.37128	0.358406		153.977	-0.118969	1	0.660835	3.56004	0.647915	3.18452	4.45705	3.42343		153.964	-2.73286e-16	1	1.41561	0.537304	2.22074	0.775781	2.03352	4.57489		153.976	0.0755127	-1	0.283733	0.50979	NaN	0.608141	NaN	2.53968		153.966	0.0975442	1	0.733639	6.23104	2.52953	0.548974	0.610739	0.590989
154.474	-0.0323418	1	1.48662	3.1246	0.0207891	4.91406	1.22614	0.343298		154.477	-0.109809	1	0.52442	3.34517	0.640302	3.02452	4.28656	3.35127		154.464	-2.73286e-16	-1	1.37682	0.575645	2.17729	0.879811	2.02992	4.66688		154.476	0.0912244	-1	0.247945	0.489178	NaN	0.606522	NaN	2.56549		154.466	0.101209	1	0.790978	5.82506	2.58146	0.622034	0.745022	0.605649
154.974	-0.00706578	1	1.4402	2.93672	0.0249544	4.91515	1.11121	0.32423		154.977	-0.0947399	1	0.368017	3.07338	0.602895	2.83559	4.02074	3.28441		154.964	-2.73286e-16	-1	1.36742	0.623308	2.13546	1.04235	2.04409	4.74933		154.976	0.103803	-1	0.225158	0.466885	NaN	0.602051	NaN	2.59883		154.966	0.102756	1	0.839421	5.71098	2.60023	0.652253	0.776041	0.644714
155.474	0.0172418	1	0.963444	2.78432	0.0300719	4.99172	1.08913	0.311466		155.477	-0.0744517	1	0.3243	2.8617	0.652322	2.83097	4.1338	3.22668		155.464	-2.73286e-16	-1	1.08814	0.901645	2.08189	1.07152	1.85947	4.84403		155.476	0.11269	-1	0.191712	0.398324	NaN	0.612536	NaN	2.58978		155.466	0.104155	1	0.880181	5.84898	2.59035	0.645474	0.717881	0.704857
155.974	0.0399249	1	1.30123	2.60144	0.03326	5.08934	1.10274	0.292295		155.977	-0.0494905	1	0.30975	2.67574	0.678124	2.76233	4.21241	3.3661		155.964	-2.73286e-16	-1	1.2602	0.791591	2.07623	1.46893	2.10882	4.92719		155.976	0.118179	-1	0.185483	0.602808	NaN	0.598736	NaN	2.61298		155.966	0.105254	1	0.903315	5.83819	2.61374	0.635457	0.750288	0.752326
156.474	0.0606861	1	1.41212	2.455	0.032685	5.14044	1.0981	0.275935		156.477	-0.0238517	1	0.292902	2.49398	0.704496	2.69193	4.28581	3.49944		156.464	-5.46571e-16	-1	1.63634	0.74687	2.11923	1.68166	2.27932	4.9675		156.476	0.117714	-1	0.17389	0.743603	NaN	0.603778	NaN	2.61542		156.466	0.105004	1	0.936217	5.93819	2.63382	0.610799	0.752349	0.805334
156.974	0.0789672	1	1.40087	2.33952	0.0297839	5.14962	1.0778	0.261811		156.977	0.00169193	1	0.274809	2.31863	0.729402	2.62066	4.35671	3.6304		156.964	-5.46571e-16	-1	2.14028	0.754615	2.20154	1.74669	2.38199	4.96842		156.976	0.111206	-1	0.165569	0.836184	NaN	0.621825	NaN	2.59861		156.966	0.103542	1	0.991973	6.28968	2.64206	0.556356	0.67801	0.871706
157.474	0.0946572	1	1.37227	2.24953	0.0259938	5.12144	1.04444	0.249347		157.477	0.0257876	-1	0.256521	2.15191	0.750809	2.54941	4.42786	3.76264		157.464	-5.46571e-16	1	2.69575	0.801961	2.31384	1.70099	2.42784	4.93338		157.476	0.0985766	-1	0.169155	0.896025	NaN	0.647041	NaN	2.56409		157.466	0.100833	1	1.06126	6.37131	2.65742	0.559893	0.665646	0.903943
157.974	0.106779	1	1.43108	2.17954	0.0227516	5.06048	1.00062	0.237969		157.977	0.0489482	-1	0.239092	1.99603	0.766683	2.47906	4.50198	3.89985		157.964	-2.73286e-16	1	3.22648	0.876042	2.44678	1.58154	2.4279	4.86582		157.976	0.081665	1	0.19328	0.938602	NaN	0.673592	NaN	2.51338		157.966	0.0977478	1	1.13903	6.35954	2.67077	0.583907	0.66388	0.922874
158.474	0.114771	1	1.68207	2.12408	0.0214945	4.97133	0.948943	0.227101		158.477	0.0700632	-1	0.223572	1.8532	0.774988	2.41051	4.58181	4.0457		158.464	0	1	3.65619	0.963991	2.59101	1.42533	2.39319	4.76918		158.476	0.0612114	1	0.246579	0.979388	NaN	0.69564	NaN	2.44799		158.466	0.0945696	1	1.24669	6.46546	2.63862	0.586481	0.532632	0.942633
158.974	0.118329	1	2.23002	2.07768	0.0236595	4.85855	0.891998	0.216168		158.977	0.0880888	-1	0.211014	1.72565	0.773691	2.34463	4.67008	4.20388		158.964	-2.73286e-16	1	3.90859	1.05294	2.73721	1.26933	2.33471	4.6469		158.976	0.0381481	1	0.337687	1.03386	NaN	0.70735	NaN	2.36944		158.966	0.090453	1	1.36113	6.49431	2.62955	0.594138	0.455578	0.935631
159.474	0.116564	1	3.17969	2.03485	0.0306835	4.72672	0.832388	0.204593		159.477	0.102573	-1	0.20247	1.61557	0.760757	2.28232	4.76952	4.37805		159.464	-2.73286e-16	1	3.90743	1.13003	2.87603	1.15053	2.26349	4.50243		159.476	0.0127541	1	0.475238	1.11749	NaN	0.702887	NaN	2.27926		159.466	0.085508	1	1.48297	6.43906	2.64566	0.607343	0.437661	0.89943
159.974	0.109331	1	4.63586	1.99013	0.0440036	4.58042	0.77271	0.191803		159.977	0.113504	-1	0.198991	1.5252	0.734151	2.22446	4.88287	4.57191		159.964	0	1	3.57643	1.18239	2.99813	1.10591	2.19055	4.3392		159.976	-0.0122363	1	0.667866	1.24575	NaN	0.676413	NaN	2.17897		159.966	0.0794047	1	1.6048	6.38381	2.66177	0.620548	0.419744	0.863229
160.474	0.0962647	1	5.29404	1.82946	0.0677392	4.39429	0.67595	0.206516		160.477	0.120338	-1	0.0996474	1.44376	0.720384	2.2017	5.04194	4.95875		160.464	0	1	3.33264	1.21272	3.14602	1.0328	2.10902	4.16204		160.476	-0.0356592	1	0.627526	1.3933	NaN	0.666267	NaN	2.05706		160.466	0.0723842	1	1.77087	6.24047	2.74376	0.660472	0.469065	0.812445
160.974	0.0782007	1	6.15491	2.02534	0.104425	4.3607	0.728359	0.177027		160.977	0.123645	-1	0.227635	1.3422	0.671648	2.12521	5.18129	5.10155		160.964	9.55234e-05	1	3.11607	1.22403	3.11426	1.00494	2.04928	3.98331		160.976	-0.056223	1	1.17694	1.58223	NaN	0.601558	NaN	1.96456		160.966	0.0658204	1	1.94303	6.07339	2.83488	0.714854	0.546589	0.760888
161.474	0.0564692	1	6.55109	2.32291	0.152149	4.17415	0.768651	0.143164		161.477	0.119901	-1	0.315604	1.25017	0.645864	2.07061	5.30285	5.23846		161.464	7.49154e-05	1	2.92348	1.25732	3.12125	0.975754	1.98239	3.82814		161.476	-0.0748356	1	1.70562	1.80641	NaN	0.547903	NaN	1.86291		161.466	0.0585256	1	2.09914	5.89015	2.90222	0.8043	0.678386	0.719759
161.974	0.0326759	1	6.57314	2.69215	0.208493	3.87483	0.797978	0.107893		161.977	0.109551	-1	0.370676	1.16677	0.63747	2.03576	5.40714	5.37492		161.964	-1.24983e-05	1	2.7528	1.30597	3.15699	0.943981	1.91128	3.69127		161.976	-0.0907865	1	2.18587	2.05329	NaN	0.50345	NaN	1.7611		161.966	0.0502246	1	2.13526	5.90876	2.94329	0.884413	0.762335	0.737104
162.474	0.00769666	1	6.3116	3.10304	0.271036	3.50294	0.817489	0.0741792		162.477	0.0936335	-1	0.399973	1.09105	0.6409	2.01851	5.49465	5.51637		162.464	-0.000127071	1	2.60193	1.3634	3.21152	0.90837	1.83889	3.56746		162.476	-0.104239	1	2.58999	2.31032	NaN	0.466342	NaN	1.66811		162.466	0.0416828	1	2.08592	6.07115	2.96563	0.957878	0.812201	0.796102
162.974	-0.0169883	1	5.85704	3.52554	0.337359	3.09868	0.828338	0.0449877		162.977	0.0736233	-1	0.410618	1.0221	0.650592	2.01675	5.56591	5.66824		162.964	-0.000238838	1	2.4688	1.42302	3.27486	0.867668	1.76816	3.45143		162.976	-0.113118	1	2.89027	2.56494	NaN	0.434727	NaN	1.5929		162.966	0.0324014	1	1.95642	5.73946	2.94408	1.06716	0.942309	0.82356
163.474	-0.0402637	1	5.30001	3.92965	0.405044	2.70224	0.831674	0.0232842		163.477	0.0504639	-1	0.409733	0.958984	0.66098	2.02832	5.62142	5.83599		163.464	-0.000327512	1	2.35133	1.47824	3.33703	0.820622	1.70204	3.33795		163.476	-0.117141	1	3.05902	2.8046	NaN	0.406749	NaN	1.54447		163.466	0.0231706	1	1.82386	5.51094	2.9052	1.13379	1.02344	0.86375
163.974	-0.0609576	1	4.73106	4.28532	0.471671	2.35383	0.828649	0.012034		163.977	0.0251651	-1	0.40444	0.900779	0.6665	2.0511	5.66168	6.02504		163.964	-0.000382486	1	2.24742	1.52246	3.38806	0.765979	1.64346	3.22174		163.976	-0.116181	1	3.06855	3.01674	NaN	0.380554	NaN	1.53179		163.966	0.0139991	1	1.69351	5.52698	2.83793	1.11617	1.0039	0.93118
164.474	-0.0792292	1	4.24076	4.56255	0.53482	2.09362	0.820414	0.0142027		164.477	-0.00166363	-1	0.401861	0.846559	0.661589	2.08294	5.68721	6.24083		164.464	-0.000498359	1	2.15501	1.54908	3.41797	0.702486	1.59537	3.09755		164.476	-0.110216	1	2.89114	3.18882	NaN	0.354289	NaN	1.56384		164.466	0.00342866	1	1.5966	5.29065	2.76515	1.08168	0.986224	0.929751
164.974	-0.0945528	1	3.91965	4.73131	0.592073	1.96184	0.80812	0.0327555		164.977	-0.02705	-1	0.409119	0.795395	0.640682	2.12172	5.69852	6.48882		164.964	-0.000472228	1	2.072	1.55152	3.41677	0.62889	1.56069	2.96012		164.976	-0.0989047	1	2.4991	3.30827	NaN	0.326097	NaN	1.6496		164.966	-0.00679974	1	1.51926	5.02556	2.69019	1.03643	0.949731	0.912131
165.474	-0.106777	1	3.64717	4.64423	0.615177	2.0341	0.791659	0.0994471		165.477	-0.0502373	-1	0.445478	0.701651	0.575269	2.17985	5.45406	6.91938		165.464	-0.000371852	1	1.90644	1.55966	3.31565	0.553788	1.53709	2.93453		165.476	-0.0823919	1	1.90067	3.51304	NaN	0.267772	NaN	1.73474		165.466	-0.0171294	1	1.49173	5.14415	2.61364	0.960446	0.788867	0.945921
165.974	-0.115261	1	3.35261	4.92537	0.701461	1.97519	0.846469	0.0827552		165.977	-0.0701254	-1	0.51367	0.730816	0.552322	2.08801	5.77306	6.80937		165.964	0.000368415	1	1.96982	1.54581	3.15501	0.542635	1.44397	2.79656		165.976	-0.0610286	1	1.5407	3.30476	NaN	0.241148	NaN	1.91493		165.966	-0.0277085	1	1.47458	5.14135	2.58049	0.917093	0.685021	0.942535
166.474	-0.118983	1	3.05975	5.10314	0.778238	1.96372	0.89778	0.0738988		166.477	-0.088045	-1	0.549514	0.731549	0.53638	1.97654	5.95497	6.76732		166.464	0.000241326	1	1.93699	1.50497	3.00549	0.555268	1.37942	2.70671		166.476	-0.0376948	1	1.24524	3.12875	NaN	0.216097	NaN	2.05778		166.466	-0.0378184	1	1.46705	5.02634	2.58745	0.903906	0.633893	0.904778
166.974	-0.116853	1	2.77534	5.19462	0.845504	1.98681	0.944467	0.071956		166.977	-0.103237	-1	0.557005	0.712074	0.53353	1.85661	6.031	6.78959		166.964	0.000125468	-1	1.82706	1.4436	2.86665	0.584994	1.34142	2.66191		166.976	-0.013451	1	1.00668	2.98051	NaN	0.193311	NaN	2.16743		166.966	-0.04718	1	1.50022	5.3479	2.66048	0.922094	0.614586	0.900541
167.474	-0.109335	1	2.50613	5.21691	0.903251	2.03157	0.985405	0.0760049		167.477	-0.115453	-1	0.54014	0.680617	0.54986	1.73939	6.03236	6.87256		167.464	0.00062084	-1	1.65913	1.36815	2.73809	0.625123	1.32793	2.65906		167.476	0.0106368	1	0.817382	2.85549	NaN	0.173484	NaN	2.24798		167.466	-0.0561194	1	1.55173	5.68768	2.74026	0.955522	0.624744	0.89295
167.974	-0.0964324	1	2.25887	5.18711	0.951476	2.08511	1.01947	0.0851234		167.977	-0.122196	-1	0.502912	0.645406	0.591454	1.63605	5.99026	7.01262		167.964	0.00245155	-1	1.4523	1.28507	2.61939	0.668962	1.33692	2.69507		167.976	0.0339202	1	0.669725	2.74919	NaN	0.15731	NaN	2.30357		167.966	-0.0634993	1	1.6363	5.944	2.8172	1.01716	0.697906	0.867283
168.474	-0.0787448	1	2.0403	5.12231	0.990172	2.13456	1.04553	0.0983897		168.477	-0.123291	-1	0.449318	0.614665	0.6644	1.55778	5.93591	7.20614		168.464	0.00589767	-1	1.22567	1.2008	2.51012	0.709821	1.36635	2.76685		168.476	0.055364	1	0.55608	2.65708	NaN	0.145484	NaN	2.33831		168.466	-0.0702532	1	1.74052	6.20173	2.90545	1.12275	0.769796	0.86731
168.974	-0.0571558	1	1.85718	5.03961	1.01933	2.16702	1.06247	0.114882		168.977	-0.118678	-1	0.383353	0.596621	0.774785	1.51573	5.90051	7.44952		168.964	0.0110659	-1	0.998332	1.12181	2.40988	0.741007	1.41419	2.87132		168.976	0.0739015	1	0.468821	2.57464	NaN	0.138699	NaN	2.35632		168.966	-0.0760477	1	1.84968	6.43356	2.99465	1.25631	0.838888	0.882421
169.474	-0.0325337	1	1.71626	4.95608	1.03896	2.16962	1.06916	0.133678		169.477	-0.109272	-1	0.309011	0.5995	0.928694	1.5211	5.91528	7.73913		169.464	0.017256	-1	0.789399	1.05455	2.31824	0.755828	1.4784	3.00537		169.476	0.089357	1	0.400322	2.49733	NaN	0.13765	NaN	2.36174		169.466	-0.0804137	1	1.91142	6.35662	3.03445	1.48	0.882238	0.935532
169.974	-0.00695897	1	1.62427	4.88884	1.04904	2.12946	1.06447	0.153855		169.977	-0.094042	1	0.230289	0.631527	1.13221	1.58504	6.01142	8.07135		169.964	0.0256676	-1	0.617967	1.00546	2.23479	0.747594	1.55696	3.16593		169.976	0.101659	1	0.342957	2.42065	NaN	0.143029	NaN	2.35867		169.966	-0.0837907	1	1.92267	6.32864	3.07539	1.64653	0.895135	0.932812
170.474	0.0175587	1	1.48988	4.94962	1.05148	2.05566	1.0694	0.172779		170.477	-0.073558	1	0.30257	0.619437	1.27582	1.62451	6.20277	8.22681		170.464	0.0349407	-1	1.18261	0.993449	2.04032	1.24581	1.6456	3.29401		170.476	0.110517	1	0.32709	2.3451	NaN	0.176457	NaN	2.34088		170.466	-0.0864453	1	1.87773	6.35516	3.1176	1.74941	0.874131	0.867936
170.974	0.0408779	1	1.49668	4.72416	1.07238	2.08519	1.06639	0.168204		170.977	-0.0490282	1	0.296575	0.577678	1.38784	1.73768	6.22158	8.10229		170.964	0.0435082	-1	0.609182	0.913049	2.09241	0.860502	1.68637	3.50387		170.976	0.116735	1	0.272709	2.23215	NaN	0.15032	NaN	2.32648		170.966	-0.0878738	1	1.75877	6.27356	3.09938	1.85167	0.867352	0.802288
171.474	0.0617761	1	1.50103	4.59444	1.09978	2.06923	1.0476	0.16091		171.477	-0.0234221	1	0.335197	0.677663	1.55777	1.79532	6.18258	7.98554		171.464	0.0519765	1	0.588791	0.866163	2.10956	0.70592	1.71366	3.68302		171.476	0.116987	1	0.232829	2.13647	NaN	0.144737	NaN	2.33608		171.466	-0.088364	1	1.62855	6.21901	3.07675	1.88427	0.84666	0.721781
171.974	0.0799145	1	1.50711	4.53568	1.13266	2.01954	1.01766	0.151744		171.977	0.0024507	1	0.409567	0.887107	1.77153	1.80631	6.09828	7.87042		171.964	0.059136	1	0.997543	0.849223	2.09545	0.739903	1.72686	3.82865		171.976	0.110993	1	0.204726	2.05536	NaN	0.155382	NaN	2.36126		171.966	-0.0871935	1	1.50293	6.30688	3.07287	1.69998	0.774936	0.595351
172.474	0.0952955	1	1.51909	4.52311	1.16998	1.94791	0.981201	0.141552		172.477	0.0269048	1	0.510818	1.17373	2.01506	1.7795	5.98117	7.75078		172.464	0.063495	1	1.71154	0.858662	2.05372	0.920284	1.72536	3.93795		172.476	0.0994614	1	0.185674	1.98612	NaN	0.177931	NaN	2.39361		172.466	-0.084924	1	1.43271	6.40206	3.08343	1.5604	0.73009	0.539798
172.974	0.107035	1	1.54114	4.53196	1.21071	1.8661	0.942859	0.131182		172.977	0.0503051	1	0.630083	1.50524	2.27426	1.72377	5.84375	7.62049		172.964	0.0659862	1	2.60687	0.890914	1.98804	1.2049	1.70855	4.00814		172.976	0.083309	1	0.172949	1.92604	NaN	0.20806	NaN	2.42472		172.966	-0.0818854	1	1.3941	6.50189	3.10264	1.44608	0.700499	0.524641
173.474	0.114647	1	1.57745	4.53746	1.25382	1.7859	0.907261	0.121482		173.477	0.0715162	1	0.758494	1.84935	2.53509	1.64798	5.69853	7.4734		173.464	0.065508	1	3.55965	0.942411	1.90207	1.55158	1.67584	4.03641		173.476	0.0633321	1	0.163826	1.87241	NaN	0.241445	NaN	2.4462		173.466	-0.0778873	1	1.35384	6.65516	3.16728	1.3018	0.661177	0.502475
173.974	0.117853	1	1.63219	4.51483	1.29829	1.71907	0.879039	0.113297		173.977	0.0894393	1	0.887183	2.17379	2.78345	1.561	5.55801	7.30337		173.964	0.0614929	1	4.44598	1.00959	1.79947	1.91816	1.62661	4.01995		173.976	0.0404553	-1	0.155579	1.82253	NaN	0.273761	NaN	2.44962		173.966	-0.0726632	1	1.30833	6.47966	3.21854	1.29219	0.688059	0.485712
174.474	0.11599	1	1.70953	4.43931	1.34307	1.67741	0.862822	0.107475		174.477	0.104051	1	1.00728	2.44626	3.00528	1.47169	5.43468	7.10427		174.464	0.0542209	1	5.14194	1.08887	1.68391	2.26248	1.56026	3.95598		174.476	0.0146108	-1	0.145484	1.7737	NaN	0.300685	NaN	2.42659		174.466	-0.0671687	1	1.2543	5.76911	3.24802	1.50172	0.822686	0.477745
174.974	0.108941	1	1.81366	4.28612	1.38715	1.67268	0.863241	0.104864		174.977	0.114764	1	1.10993	2.63449	3.1865	1.38893	5.34104	6.86995		174.964	0.0420351	1	5.52365	1.17671	1.55904	2.54237	1.47619	3.84169		174.976	-0.0104603	-1	0.130815	1.72321	NaN	0.317893	NaN	2.36869		174.966	-0.0612729	1	1.14185	5.64248	3.27143	1.50755	0.729841	0.474623
175.474	0.09623	1	1.84581	4.23112	1.42813	1.61936	0.852939	0.0872054		175.477	0.121083	1	1.36658	2.97829	3.47131	1.21263	5.06234	6.66538		175.464	0.0259	1	5.63597	1.28212	1.46737	2.67306	1.35958	3.69612		175.476	-0.0335795	-1	0.109354	1.66249	NaN	0.334431	NaN	2.30396		175.466	-0.0549289	1	1.01704	5.67597	3.28823	1.44944	0.573644	0.472451
175.974	0.0778066	1	1.93088	4.09714	1.49163	1.63393	0.844443	0.0597708		175.977	0.124002	1	1.20914	2.77821	3.35531	1.19198	5.1299	6.35681		175.964	0.00728975	1	5.34128	1.37181	1.39969	2.52199	1.35075	3.59233		175.976	-0.0545731	-1	0.126828	1.59108	NaN	0.354162	NaN	2.25457		175.966	-0.0478749	1	0.918932	5.62989	3.2804	1.37762	0.443452	0.467672
176.474	0.0559567	1	1.95916	4.06582	1.54843	1.6217	0.83102	0.0394415		176.477	0.119977	1	1.11261	2.65651	3.34545	1.16047	5.10789	6.04328		176.464	-0.0142927	1	5.04998	1.41418	1.33286	2.40012	1.33532	3.47469		176.476	-0.0733258	-1	0.146677	1.5201	NaN	0.371726	NaN	2.20153		176.466	-0.0401023	1	0.822781	5.9299	3.28669	1.21031	0.264953	0.465349
176.974	0.0321246	1	1.9426	4.11185	1.60106	1.58915	0.815278	0.025233		176.977	0.109348	1	1.06413	2.60059	3.41517	1.11987	5.01847	5.73131		176.964	-0.0367921	1	4.7579	1.41829	1.26663	2.30139	1.31343	3.34731		176.976	-0.0894587	-1	0.16697	1.45164	NaN	0.388062	NaN	2.14753		176.966	-0.0313111	1	0.728225	6.51216	3.30447	0.965122	0.0470593	0.46503
177.474	0.00728552	1	1.89318	4.20994	1.65205	1.54273	0.799823	0.0161605		177.477	0.0935533	1	1.05084	2.59781	3.53792	1.07196	4.88382	5.42743		177.464	-0.0579826	1	4.46083	1.39319	1.20076	2.21971	1.2852	3.2143		177.476	-0.10373	-1	0.185775	1.38777	NaN	0.404113	NaN	2.09527		177.466	-0.0222791	1	0.660959	6.40038	3.3209	0.955992	0.0895973	0.466158
177.974	-0.0171207	1	1.82287	4.33478	1.70395	1.48892	0.787259	0.0112393		177.977	0.0734983	1	1.05989	2.63558	3.68715	1.01852	4.72609	5.13818		177.964	-0.0782511	1	4.15459	1.34792	1.13502	2.14902	1.25077	3.07976		177.976	-0.113235	-1	0.20116	1.33057	NaN	0.42082	NaN	2.04744		177.966	-0.0122371	1	0.593568	6.18351	3.32274	1.03123	0.152081	0.468744
178.474	-0.0400957	1	1.74364	4.46108	1.75929	1.43418	0.780193	0.00948473		178.477	0.0502048	1	1.0784	2.70127	3.83629	0.961326	4.56744	4.87009		178.464	-0.0960394	1	3.83501	1.29154	1.06917	2.08323	1.21027	2.9478		178.476	-0.117775	-1	0.211196	1.28213	NaN	0.439124	NaN	2.00675		178.466	-0.00164941	1	0.521682	5.85568	3.29446	1.2454	0.215655	0.474143
178.974	-0.0605571	1	1.66747	4.56353	1.8206	1.38497	0.781232	0.00991217		178.977	0.024767	1	1.09353	2.78227	3.9588	0.902154	4.43005	4.62969		178.964	-0.110282	1	3.49789	1.23309	1.00297	2.01628	1.16383	2.82251		178.976	-0.11724	-1	0.213949	1.24451	NaN	0.459967	NaN	1.9759		178.966	0.00955938	1	0.452377	5.72874	3.21116	1.415	0.232832	0.481813
179.474	-0.0778935	1	1.60632	4.61683	1.89042	1.34777	0.792981	0.0115369		179.477	-0.00222561	1	1.0924	2.86596	4.02813	0.842783	4.33607	4.42352		179.464	-0.120101	1	3.13905	1.18164	0.936179	1.94208	1.11158	2.70799		179.476	-0.111465	-1	0.207489	1.21981	NaN	0.484291	NaN	1.95759		179.466	0.0209373	1	0.386839	5.68456	3.09974	1.54885	0.223585	0.490073
179.974	-0.0926509	1	1.57217	4.5957	1.97129	1.32903	0.818045	0.0133743		179.977	-0.0275874	1	1.06217	2.93974	4.01771	0.784988	4.30767	4.2581		179.964	-0.125029	1	2.75431	1.14622	0.868561	1.85457	1.05365	2.60837		179.976	-0.10039	-1	0.189883	1.21009	NaN	0.513037	NaN	1.9545		179.966	0.0316855	1	0.34311	5.66668	2.93788	1.53869	0.150187	0.495879
180.474	-0.104635	1	1.47557	4.60087	2.00771	1.26435	0.837903	0.017569		180.477	-0.0504077	1	1.05042	2.96844	3.95624	0.74785	4.32919	4.03368		180.464	-0.125075	1	2.48561	1.10536	0.803707	1.72878	1.05641	2.58866		180.476	-0.0840595	-1	0.190547	1.2214	NaN	0.525459	NaN	1.91531		180.466	0.0419053	1	0.312489	5.79461	2.78347	1.40126	0.0479537	0.497171
180.974	-0.113796	1	1.406	4.61765	2.04389	1.25704	0.87639	0.0243897		180.977	-0.0702071	1	0.871412	3.05267	3.9229	0.692374	4.25128	3.84998		180.964	-0.120462	1	2.14975	1.05491	0.75607	1.66638	1.07268	2.5964		180.976	-0.0621006	-1	0.216628	1.15816	NaN	0.539748	NaN	1.96761		180.966	0.0519732	1	0.294861	6.06706	2.63644	1.13768	-0.0828614	0.49399
181.474	-0.118228	1	1.33783	4.63713	2.07514	1.24162	0.849917	0.0294808		181.477	-0.0879917	1	0.723184	3.13376	3.94729	0.650186	4.1638	3.67671		181.464	-0.108838	1	1.88349	1.00963	0.725696	1.61565	1.09067	2.61582		181.476	-0.0384775	-1	0.225601	1.12455	NaN	0.551623	NaN	2.00765		181.466	0.0619646	1	0.314596	6.02202	2.66578	0.959897	-0.12548	0.481429
181.974	-0.116867	1	1.27289	4.65541	2.10284	1.22015	0.776559	0.0330865		181.977	-0.103008	1	0.602081	3.21113	4.00963	0.617668	4.07555	3.51413		181.964	-0.0917718	1	1.67533	0.967753	0.707232	1.57665	1.10956	2.64401		181.976	-0.0140152	-1	0.225343	1.11358	NaN	0.562696	NaN	2.0339		181.966	0.0712164	1	0.338414	5.98638	2.71485	0.837022	-0.155003	0.472958
182.474	-0.109341	1	1.21303	4.66858	2.12836	1.1947	0.674385	0.035451		182.477	-0.115155	1	0.504452	3.28419	4.09011	0.591203	3.99537	3.36247		182.464	-0.0705483	1	1.51373	0.92751	0.695326	1.54944	1.1285	2.67809		182.476	0.0105177	-1	0.223731	1.11827	NaN	0.57458	NaN	2.04483		182.466	0.0789087	1	0.361299	6.07778	2.76073	0.834987	-0.177399	0.478536
182.974	-0.0966634	1	1.16007	4.67271	2.15307	1.16734	0.56147	0.0368185		182.977	-0.121884	1	0.426642	3.35234	4.16893	0.567172	3.93208	3.222		182.964	-0.046393	1	1.3872	0.887134	0.684625	1.53407	1.14664	2.71513		182.976	0.0342493	-1	0.228644	1.13164	NaN	0.588886	NaN	2.03892		182.966	0.0859713	1	0.373357	6.07238	2.82113	0.850775	-0.169036	0.47448
183.474	-0.0793296	1	1.11584	4.6639	2.17834	1.14013	0.455884	0.0374331		183.477	-0.123068	1	0.365001	3.41499	4.22631	0.541959	3.89451	3.09297		183.464	-0.0205373	1	1.28421	0.844857	0.669779	1.53061	1.16315	2.75225		183.476	0.0562056	1	0.247958	1.14672	NaN	0.607227	NaN	2.01464		183.466	0.092235	1	0.379841	6.01714	2.889	0.875737	-0.144843	0.465464
183.974	-0.0581039	1	1.08217	4.63823	2.20556	1.11514	0.3757	0.0375391		183.977	-0.118721	1	0.315875	3.47154	4.24244	0.511947	3.89148	2.97563		183.964	0.00590598	-1	1.19325	0.798912	0.645433	1.53912	1.17718	2.78653		183.976	0.0753455	1	0.28955	1.15652	NaN	0.631215	NaN	1.97046		183.966	0.0974677	1	0.385872	5.96001	2.95437	0.900601	-0.120585	0.45579
184.474	-0.0333218	1	1.06089	4.5918	2.23609	1.09442	0.33899	0.0373806		184.477	-0.109596	1	0.275612	3.52142	4.19752	0.473518	3.93182	2.87023		184.464	0.0314918	-1	1.10282	0.747532	0.606237	1.55965	1.18789	2.81509		184.476	0.0911939	1	0.361299	1.15406	NaN	0.662461	NaN	1.90485		184.466	0.101293	1	0.376249	5.83762	2.93351	0.922091	-0.0940748	0.423442
184.974	-0.00782036	1	1.05384	4.52069	2.27131	1.08005	0.363826	0.0372018		184.977	-0.0944874	1	0.24056	3.56402	4.07176	0.423054	4.02435	2.77702		184.964	0.0544412	-1	1.00138	0.688949	0.546838	1.59226	1.19443	2.835		184.976	0.103795	1	0.471081	1.13237	NaN	0.702579	NaN	1.81629		184.966	0.103618	1	0.370652	5.57382	2.94157	0.9278	-0.0358421	0.380753
185.474	0.0166601	1	1.0216	4.3308	2.27026	1.05688	0.376197	0.030846		185.477	-0.0741404	1	0.170246	3.69217	3.94729	0.388511	4.10309	2.65156		185.464	0.0745754	-1	0.990204	0.682376	0.532072	1.69532	1.26392	2.98134		185.476	0.112609	1	0.541925	1.31872	NaN	0.733343	NaN	1.82734		185.466	0.104235	1	0.370575	5.11618	2.98928	0.911875	0.0658762	0.323888
185.974	0.0391884	1	1.10784	4.41638	2.33768	1.03873	0.423147	0.0351795		185.977	-0.0497717	1	0.249457	3.58131	4.15267	0.362111	3.98528	2.53844		185.964	0.0910117	-1	0.703411	0.670327	0.498735	1.70427	1.33352	3.1321		185.976	0.117892	1	0.663245	1.10661	NaN	0.780097	NaN	1.71548		185.966	0.104214	1	0.390086	4.6847	3.00118	0.910112	0.12515	0.290475
186.474	0.0596669	1	1.16733	4.51287	2.39482	1.01191	0.458347	0.0352243		186.477	-0.0243729	1	0.287066	3.49852	4.29815	0.333932	3.87422	2.4264		186.464	0.105042	-1	0.475101	0.664848	0.46508	1.75378	1.39635	3.27548		186.476	0.117427	1	0.721289	0.944042	NaN	0.811297	NaN	1.68155		186.466	0.103635	1	0.417273	4.3026	3.00112	0.960746	0.186699	0.268483
186.974	0.0777847	1	1.20502	4.61655	2.44197	0.978789	0.483126	0.0321339		186.977	0.00110771	1	0.293256	3.44205	4.39207	0.305451	3.77143	2.31541		186.964	0.115775	-1	0.334613	0.665918	0.431711	1.84361	1.45006	3.40656		186.976	0.110899	1	0.729671	0.841317	NaN	0.828942	NaN	1.70868		186.966	0.101906	1	0.456158	4.10969	2.98885	1.22759	0.306764	0.27039
187.474	0.0939352	1	1.22587	4.72366	2.47947	0.941714	0.49881	0.0270618		187.477	0.0251469	1	0.278208	3.41013	4.44279	0.278148	3.67844	2.20544		187.464	0.122018	-1	0.311283	0.673513	0.399233	1.97355	1.49229	3.52044		187.476	0.098748	1	0.702004	0.808735	NaN	0.835028	NaN	1.78001		187.466	0.0996197	1	0.509043	3.9772	2.91142	1.36052	0.323474	0.266653
187.974	0.106286	1	1.23481	4.83049	2.50762	0.903046	0.506727	0.0211616		187.977	0.0483399	1	0.252104	3.40104	4.45865	0.253498	3.59675	2.09647		187.964	0.122276	-1	0.434451	0.687613	0.36825	2.14336	1.5207	3.61222		187.976	0.082122	1	0.651903	0.856593	NaN	0.831552	NaN	1.87866		187.966	0.0967502	1	0.572857	3.89189	2.78315	1.38891	0.259504	0.25851
188.474	0.114379	1	1.2368	4.93329	2.52674	0.865144	0.508202	0.0155867		188.477	0.0694987	1	0.225124	3.41301	4.448	0.23298	3.52789	1.98846		188.464	0.116687	-1	0.733454	0.708194	0.339366	2.35282	1.53293	3.67699		188.476	0.0617728	1	0.592982	0.995191	NaN	0.820511	NaN	1.98777		188.466	0.0929633	1	0.67757	3.96411	2.6318	1.44109	0.262795	0.242475
188.974	0.117901	1	1.23678	5.02833	2.53715	0.830364	0.504565	0.0114906		188.977	0.0875358	1	0.20745	3.44429	4.41919	0.218072	3.47338	1.88139		188.964	0.10556	-1	1.23763	0.735234	0.313188	2.60171	1.52664	3.70985		188.976	0.0386588	1	0.538854	1.23483	NaN	0.803903	NaN	2.09045		188.966	0.0893369	1	0.797912	3.9641	2.473	1.43328	0.226197	0.229707
189.474	0.116311	1	1.23971	5.11188	2.53917	0.801066	0.497141	0.0100268		189.477	0.102451	1	0.209264	3.49315	4.38056	0.210251	3.43473	1.77522		189.464	0.0899201	1	1.97632	0.768711	0.290318	2.88979	1.49946	3.70589		189.476	0.0130256	1	0.503134	1.5858	NaN	0.783725	NaN	2.16985		189.466	0.0846709	1	0.945693	3.80526	2.30146	1.30342	0.103703	0.224194
189.974	0.109492	1	1.25053	5.1802	2.5331	0.779607	0.487259	0.0123488		189.977	0.113529	1	0.240746	3.55782	4.34046	0.210995	3.41347	1.66993		189.964	0.0688479	1	2.97886	0.808603	0.271361	3.21684	1.44906	3.6602		189.976	-0.0121671	-1	0.499435	2.05841	NaN	0.761973	NaN	2.2091		189.966	0.0786948	1	1.09702	3.71743	2.16229	1.36384	0.106365	0.220869
190.474	0.0969089	1	1.27772	5.21359	2.59459	0.762336	0.41462	0.00832597		190.477	0.120399	1	0.389877	3.49618	4.4064	0.168627	3.36585	1.62621		190.464	0.043908	1	5.0992	0.686453	0.269172	3.90094	1.37545	3.60493		190.476	-0.0356185	-1	0.456409	2.95939	NaN	0.733529	NaN	2.15431		190.466	0.0729509	1	1.24431	3.64739	2.03422	1.4927	0.145519	0.220233
190.974	0.0784169	1	1.38657	5.34041	2.62708	0.7469	0.438472	0.0124887		190.977	0.123834	1	0.598748	3.50596	4.37395	0.137619	3.40367	1.57122		190.964	0.0170531	1	4.77465	0.836356	0.269524	3.73521	1.29821	3.54553		190.976	-0.0562211	-1	0.547356	2.98477	NaN	0.72851	NaN	2.0795		190.966	0.0664167	1	1.35352	3.5149	1.89891	1.60174	0.111052	0.232882
191.474	0.0565951	1	1.45307	5.53523	2.69774	0.739245	0.446778	0.0187422		191.477	0.120304	1	0.754178	3.52189	4.3654	0.110519	3.40912	1.5182		191.464	-0.00881886	1	4.48504	0.921671	0.273372	3.57856	1.23338	3.45859		191.476	-0.0748449	-1	0.547311	2.96883	NaN	0.716706	NaN	2.04525		191.466	0.0591467	1	1.41731	3.47218	1.78374	1.65095	0.103615	0.236886
191.974	0.0327381	1	1.48287	5.76754	2.79508	0.737413	0.44175	0.0264654		191.977	0.11016	1	0.860406	3.53922	4.37575	0.0869363	3.38856	1.46574		191.964	-0.0330897	1	4.21594	0.954431	0.279487	3.433	1.18201	3.35801		191.976	-0.0907919	-1	0.486665	2.91892	NaN	0.699698	NaN	2.04431		191.966	0.0515643	1	1.43907	3.51252	1.6872	1.64478	0.121188	0.232892
192.474	0.00788062	1	1.48164	6.0068	2.90757	0.739443	0.425601	0.0350369		192.477	0.0948308	1	0.921671	3.55321	4.4	0.0664808	3.34836	1.41244		192.464	-0.0546915	1	3.95296	0.946671	0.286639	3.30054	1.14514	3.25768		192.476	-0.104325	-1	0.395811	2.8424	NaN	0.679069	NaN	2.06945		192.466	0.0432719	1	1.41673	3.53997	1.60421	1.65535	0.12292	0.243113
192.974	-0.0165413	1	1.45503	6.22252	3.02371	0.743375	0.400545	0.0438356		192.977	0.0750233	1	0.942213	3.55912	4.43313	0.0487629	3.29491	1.35691		192.964	-0.07476	1	3.68168	0.910426	0.293599	3.18319	1.1238	3.17147		192.976	-0.113244	-1	0.305137	2.74663	NaN	0.656399	NaN	2.11342		192.966	0.0341596	1	1.39917	3.56777	1.52733	1.65692	0.134269	0.248294
193.474	-0.0395403	1	1.40871	6.38416	3.13198	0.747251	0.368795	0.0522403		193.477	0.0517742	1	0.926273	3.55218	4.47016	0.033393	3.23457	1.29774		193.464	-0.0922112	1	3.38768	0.857731	0.299136	3.08295	1.11905	3.11328		193.476	-0.117252	-1	0.245036	2.63898	NaN	0.63327	NaN	2.16897		193.466	0.0252289	1	1.40249	3.59935	1.4613	1.63418	0.171139	0.238759
193.974	-0.0600157	1	1.34833	6.46121	3.22088	0.749109	0.332564	0.0596298		193.977	0.0261872	1	0.878089	3.52767	4.50608	0.0199811	3.17371	1.23355		193.964	-0.106201	1	3.05657	0.80062	0.302021	3.00183	1.13192	3.09698		193.976	-0.116221	-1	0.245898	2.5268	NaN	0.611264	NaN	2.22888		193.966	0.0152672	1	1.49983	3.50566	1.37871	1.64292	0.172903	0.233993
194.474	-0.077702	1	1.27956	6.42316	3.27889	0.746991	0.294066	0.0653828		194.477	-0.00103908	1	0.801901	3.48082	4.53587	0.00813756	3.11872	1.16292		194.464	-0.116039	1	2.67392	0.751128	0.301024	2.94185	1.16346	3.13646		194.476	-0.110538	-1	0.338115	2.41746	NaN	0.591961	NaN	2.28589		194.466	0.00471771	1	1.64106	3.3558	1.29077	1.66465	0.163107	0.231507
194.974	-0.0925703	1	1.20806	6.23947	3.29451	0.738937	0.255514	0.0688782		194.977	-0.0268532	1	0.701948	3.4069	4.55456	-0.00252741	3.07596	1.08446		194.964	-0.121746	1	2.22533	0.72129	0.294916	2.90501	1.21472	3.24561		194.976	-0.0992818	-1	0.552076	2.31831	NaN	0.576944	NaN	2.33276		194.966	-0.0053033	1	1.80367	3.20355	1.22596	1.67425	0.200113	0.23072
195.474	-0.104419	1	1.0803	6.08736	3.29949	0.75498	0.219743	0.0775564		195.477	-0.0501354	1	0.596239	3.47521	4.2942	0.0430427	2.70974	1.02533		195.464	-0.12276	1	2.00905	0.721802	0.268111	2.92771	1.24274	3.26162		195.476	-0.082659	-1	0.429899	2.25577	NaN	0.588319	NaN	2.40078		195.466	-0.016364	1	1.95723	3.02645	1.16943	1.7076	0.215205	0.236257
195.974	-0.11311	1	1.05471	5.88326	3.31199	0.761827	0.229257	0.0732097		195.977	-0.0703161	1	0.521189	3.37678	4.44623	0.00910423	2.95481	0.928268		195.964	-0.119178	1	1.502	0.701499	0.279503	2.91686	1.32096	3.40508		195.976	-0.0612745	-1	0.333834	2.14397	NaN	0.559617	NaN	2.47719		195.966	-0.0272431	1	2.0996	2.81863	1.12314	1.77031	0.203208	0.249615
196.474	-0.117175	1	1.03575	5.65994	3.32516	0.765104	0.239049	0.0685428		196.477	-0.0882476	1	0.447919	3.31824	4.51486	-0.00983074	3.02893	0.846531		196.464	-0.107994	1	1.17394	0.681695	0.273849	2.95496	1.39591	3.49417		196.476	-0.0377377	-1	0.291022	2.04144	NaN	0.547638	NaN	2.55156		196.466	-0.0370023	1	2.10246	2.93707	1.0907	1.7618	0.252806	0.243433
196.974	-0.115524	1	1.02405	5.42361	3.34057	0.76449	0.249148	0.0639178		196.977	-0.103254	1	0.378906	3.28834	4.51553	-0.0147955	2.97386	0.778024		196.964	-0.0907419	-1	0.986876	0.664866	0.256985	3.03785	1.46578	3.53895		196.976	-0.0131886	-1	0.290025	1.95068	NaN	0.549012	NaN	2.62136		196.966	-0.0469727	1	2.07111	3.04036	1.06114	1.76253	0.307725	0.232972
197.474	-0.108149	1	1.02023	5.1805	3.35984	0.759659	0.25958	0.059697		197.477	-0.115238	1	0.316629	3.27581	4.46364	-0.00682342	2.83137	0.720654		197.464	-0.0688945	-1	0.902818	0.653487	0.234748	3.16136	1.52878	3.54951		197.476	0.0108308	-1	0.319406	1.87423	NaN	0.560368	NaN	2.68405		197.466	-0.0557515	1	2.01324	2.89894	1.0326	1.83583	0.342825	0.220447
197.974	-0.0955259	1	1.02489	4.93681	3.38456	0.750287	0.270374	0.0562425		197.977	-0.121923	1	0.263569	3.26938	4.37462	0.0130522	2.64324	0.672328		197.964	-0.0444191	1	0.883771	0.650033	0.212973	3.32133	1.58309	3.5359		197.976	0.0342065	-1	0.367727	1.8146	NaN	0.578337	NaN	2.73711		197.966	-0.0636636	1	1.94419	2.92936	0.991344	1.88313	0.398143	0.203375
198.474	-0.0782027	1	1.03867	4.69875	3.41633	0.736052	0.281557	0.0539167		198.477	-0.123137	1	0.222202	3.25779	4.26389	0.0437982	2.45123	0.630952		198.464	-0.0184855	1	0.891745	0.656978	0.197495	3.51358	1.6269	3.5082		198.476	0.0558119	-1	0.423551	1.77433	NaN	0.599549	NaN	2.77799		198.466	-0.0711151	1	1.86958	3.05724	0.942822	1.91596	0.464548	0.184017
198.974	-0.0569827	1	1.06219	4.47253	3.45676	0.716628	0.293157	0.0530816		198.977	-0.118904	1	0.195009	3.22978	4.14687	0.0843811	2.29712	0.594435		198.964	0.00780145	1	0.888746	0.676797	0.194151	3.73395	1.65842	3.47647		198.976	0.0745153	-1	0.475441	1.75593	NaN	0.620634	NaN	2.80418		198.966	-0.076428	1	1.84316	2.9975	0.90553	1.99077	0.490959	0.183371
199.474	-0.0324862	1	1.09606	4.26437	3.50745	0.691693	0.305202	0.0540995		199.477	-0.109908	1	0.184469	3.17409	4.03898	0.133768	2.22268	0.560684		199.464	0.0333721	1	0.836782	0.711966	0.208776	3.97828	1.67582	3.45079		199.476	0.0903747	-1	0.511959	1.76193	NaN	0.638222	NaN	2.81313		199.466	-0.0806717	1	1.8157	2.99599	0.864359	2.05735	0.498794	0.186403
199.974	-0.00720877	1	1.1409	4.08047	3.57	0.660922	0.31772	0.0573326		199.977	-0.0948178	1	0.193059	3.07943	3.95564	0.190924	2.26968	0.527605		199.964	0.0560792	1	0.69786	0.76496	0.247207	4.24239	1.67732	3.44123		199.976	0.102819	-1	0.521667	1.79486	NaN	0.648945	NaN	2.80232		199.966	-0.0845475	1	1.7868	3.07529	0.817804	2.11249	0.48085	0.194541
200.474	0.0170406	1	1	3.88117	3.59763	0.621558	0.475201	0.0482409		200.477	-0.0742912	1	0.29888	3.03924	3.91709	0.266618	2.5318	0.485115		200.464	0.0759235	1	0.918479	0.770698	0.257867	4.39163	1.65147	3.46044		200.476	0.111545	-1	0.51996	1.4406	NaN	0.686634	NaN	2.67305		200.466	-0.0868342	1	1.72652	3.09858	0.794134	2.14682	0.483523	0.200136
200.974	0.0396354	1	1.25451	3.79454	3.71244	0.59219	0.381935	0.0619579		200.977	-0.0498286	1	0.30427	2.86594	4.13736	0.253514	2.26098	0.487543		200.964	0.0920406	1	0.338354	0.801534	0.272473	4.20846	1.58626	3.39592		200.976	0.117174	-1	0.566443	1.75543	NaN	0.627528	NaN	2.74545		200.966	-0.0882838	1	1.65789	3.07896	0.77123	2.18425	0.490881	0.206465
201.474	0.0599623	1	1.46383	3.72802	3.76434	0.557667	0.344373	0.0668992		201.477	-0.0239665	1	0.344201	2.77907	4.28782	0.242007	2.04556	0.483816		201.464	0.106107	1	0.114332	0.807127	0.271885	4.07802	1.52958	3.33506		201.476	0.116915	-1	0.616369	1.93434	NaN	0.596682	NaN	2.74193		201.466	-0.0890616	1	1.58541	2.93661	0.729072	2.25489	0.497439	0.218323
201.974	0.0777964	1	1.63731	3.67638	3.76689	0.520213	0.34931	0.0652701		201.977	0.00199697	1	0.409193	2.75455	4.38002	0.232444	1.88731	0.473122		201.964	0.117018	1	0.188792	0.793983	0.259903	3.98913	1.47924	3.27519		201.976	0.110479	-1	0.666616	2.00762	NaN	0.588323	NaN	2.67867		201.966	-0.0876207	1	1.49979	2.8839	0.690841	2.30559	0.529501	0.224341
202.474	0.0933581	1	1.78432	3.63441	3.73369	0.48205	0.38354	0.0592756		202.477	0.0263443	1	0.489765	2.76832	4.4255	0.225169	1.78798	0.454649		202.464	0.123744	1	0.504112	0.76861	0.240332	3.93063	1.43305	3.21364		202.476	0.0988694	-1	0.714057	2.00556	NaN	0.596677	NaN	2.57186		202.466	-0.085571	1	1.40403	2.90037	0.655641	2.3409	0.581247	0.225851
202.974	0.105255	1	1.91421	3.59691	3.6783	0.445401	0.433858	0.0511209		202.977	0.0496097	1	0.576437	2.79629	4.43581	0.220529	1.74932	0.427587		202.964	0.124224	1	1.00267	0.737514	0.216972	3.89136	1.38885	3.14773		202.976	0.0825632	-1	0.755569	1.95843	NaN	0.61597	NaN	2.43768		202.966	-0.0827731	1	1.31006	2.90555	0.626851	2.41757	0.620834	0.233477
203.474	0.113043	1	2.03633	3.55866	3.61432	0.41249	0.487059	0.0430111		203.477	0.0705757	1	0.65973	2.81439	4.42248	0.218869	1.77308	0.391124		203.464	0.118588	1	1.62684	0.707203	0.193628	3.86015	1.34444	3.07481		203.476	0.0624098	1	0.788028	1.89652	NaN	0.640427	NaN	2.29232		203.466	-0.0785763	1	1.21281	2.92246	0.601164	2.50527	0.644824	0.245457
203.974	0.116421	1	2.16004	3.51444	3.55533	0.38554	0.529938	0.0371514		203.977	0.0881723	1	0.730163	2.79855	4.39705	0.220536	1.86101	0.344448		203.964	0.107099	1	2.319	0.684183	0.174102	3.82584	1.29764	2.99219		203.976	0.039404	1	0.808308	1.85011	NaN	0.664276	NaN	2.15196		203.966	-0.0739102	1	1.10887	2.96367	0.581103	2.6114	0.638793	0.26558
204.474	0.114872	1	2.29469	3.45905	3.5149	0.366775	0.549288	0.0357468		204.477	0.1027	1	0.778256	2.72469	4.37108	0.225876	2.01487	0.28675		204.464	0.0910175	1	3.02154	0.674962	0.162195	3.77726	1.24627	2.89722		204.476	0.0141601	1	0.813286	1.84949	NaN	0.681741	NaN	2.03279		204.466	-0.0682848	1	1.02619	2.96302	0.565678	2.53019	0.610714	0.286698
204.974	0.108237	1	2.44965	3.38727	3.50661	0.358416	0.531906	0.0410024		204.977	0.113265	1	0.794529	2.56873	4.3561	0.235234	2.23641	0.217216		204.964	0.0697583	1	3.67682	0.686047	0.161711	3.70324	1.18815	2.78722		204.976	-0.010584	1	0.799836	1.92495	NaN	0.687049	NaN	1.95099		204.966	-0.061142	1	0.953048	2.9518	0.550682	2.37825	0.574648	0.311643
205.474	0.095926	1	2.45542	3.34892	3.5351	0.367158	0.452482	0.0339933		205.477	0.119792	1	0.836917	2.48988	4.39188	0.19596	2.03805	0.228461		205.464	0.0449176	1	3.8378	0.721371	0.145096	3.42935	1.12935	2.61541		205.476	-0.0334385	1	0.673446	2.19406	NaN	0.693136	NaN	1.94404		205.466	-0.0548993	1	0.892474	2.97967	0.525597	2.21949	0.540405	0.363389
205.974	0.0775647	1	2.83203	3.58442	3.44604	0.363415	0.371181	0.0469331		205.977	0.123258	1	0.742073	2.42967	4.23608	0.17595	1.95842	0.198907		205.964	0.018243	1	3.69494	0.701335	0.156579	3.41092	1.05925	2.54514		205.976	-0.0540703	1	0.71586	2.37548	NaN	0.655955	NaN	1.94465		205.966	-0.0475576	1	0.83494	3.01467	0.505642	1.98974	0.517576	0.393676
206.474	0.0560179	1	3.05666	3.8432	3.3847	0.366434	0.352363	0.0559585		206.477	0.119697	1	0.677525	2.4138	4.11947	0.15785	1.90555	0.181158		206.464	-0.00767096	1	3.51699	0.689955	0.161124	3.35997	0.997254	2.47075		206.476	-0.0728274	1	0.878741	2.59196	NaN	0.621103	NaN	1.90154		206.466	-0.0388257	1	0.780549	3.05703	0.490992	1.68657	0.506551	0.401771
206.974	0.0324219	1	3.15571	4.0989	3.34618	0.374528	0.377033	0.0615481		206.977	0.109518	1	0.640219	2.43247	4.0335	0.141769	1.87028	0.173224		206.964	-0.0323382	1	3.31023	0.684947	0.159893	3.27817	0.94192	2.3921		206.976	-0.0890693	1	1.11932	2.82673	NaN	0.588834	NaN	1.82854		206.966	-0.0302629	1	0.767828	3.14492	0.475793	1.60408	0.50301	0.427578
207.474	0.00773444	1	3.15556	4.32515	3.32559	0.386014	0.426198	0.0641805		207.477	0.0943977	1	0.627102	2.47588	3.9696	0.12782	1.84344	0.173119		207.464	-0.0545209	1	3.0809	0.684025	0.154048	3.16716	0.891814	2.309		207.476	-0.102771	1	1.39484	3.06304	NaN	0.559401	NaN	1.73947		207.466	-0.0206814	1	0.760501	3.2387	0.460523	1.55015	0.500437	0.455679
207.974	-0.0166953	1	3.08263	4.49559	3.31803	0.399205	0.480862	0.0643344		207.977	0.0747205	1	0.635117	2.53426	3.91921	0.116112	1.81587	0.178852		207.964	-0.0750795	1	2.83527	0.684903	0.14475	3.0286	0.845502	2.22132		207.976	-0.112018	1	1.66252	3.28409	NaN	0.533057	NaN	1.64816		207.966	-0.0106222	1	0.75127	3.2907	0.440619	1.4831	0.482995	0.486907
208.474	-0.0399109	1	2.96331	4.58386	3.3186	0.412418	0.522032	0.0624884		208.477	0.0515837	1	0.661212	2.59781	3.87376	0.106756	1.77842	0.188437		208.464	-0.0929402	1	2.5796	0.685296	0.133163	2.86415	0.801546	2.12887		208.476	-0.116478	1	1.8796	3.47312	NaN	0.510056	NaN	1.56843		208.466	-0.000749275	1	0.739012	3.27623	0.413341	1.39519	0.4419	0.52311
208.974	-0.0607868	1	2.82399	4.56362	3.32242	0.423966	0.530712	0.0591211		208.977	0.0260903	1	0.702331	2.65674	3.82471	0.0998627	1.72191	0.199885		208.964	-0.107254	1	2.32015	0.682919	0.120446	2.67545	0.758513	2.03149		208.976	-0.116008	1	2.00332	3.61337	NaN	0.490652	NaN	1.5141		208.966	0.0102397	1	0.747755	3.35751	0.386453	1.27443	0.414748	0.548546
209.474	-0.0785454	1	2.69109	4.40849	3.32458	0.432166	0.487909	0.0547112		209.477	-0.00113907	1	0.755419	2.70126	3.76348	0.0955432	1.6372	0.211206		209.464	-0.117494	1	2.06319	0.675486	0.107763	2.46416	0.714967	1.92904		209.476	-0.110739	1	1.99091	3.68806	NaN	0.475099	NaN	1.49901		209.466	0.021009	1	0.761368	3.43317	0.362213	1.14247	0.395017	0.566384
209.974	-0.0937264	1	2.59099	4.09212	3.32019	0.435332	0.374627	0.0497373		209.977	-0.0266391	1	0.817423	2.72158	3.68151	0.0939078	1.51511	0.220414		209.964	-0.123037	1	1.81496	0.660712	0.096275	2.23194	0.669472	1.82133		209.976	-0.0996414	1	1.7996	3.68041	NaN	0.463649	NaN	1.53696		209.966	0.0314485	1	0.769981	3.3459	0.350765	1.00029	0.393069	0.561078
210.474	-0.10578	1	2.4806	4.01212	3.28979	0.450652	0.344096	0.0494637		210.477	-0.0494164	1	1.0645	2.51077	3.86083	0.109544	0.662601	0.312924		210.464	-0.123437	1	1.53337	0.66746	0.0723462	2.0616	0.631943	1.76371		210.476	-0.0830835	1	1.67277	3.60451	NaN	0.419287	NaN	1.55748		210.466	0.0421165	1	0.775652	3.2378	0.346812	0.856609	0.388955	0.567222
210.974	-0.114397	1	2.39659	3.90031	3.28712	0.461226	0.366808	0.0618342		210.977	-0.069411	1	0.929921	2.66194	3.52443	0.133218	1.10015	0.260656		210.964	-0.118815	1	1.40524	0.556556	0.0790476	1.84992	0.600788	1.69695		210.976	-0.0620931	1	1.44266	3.38841	NaN	0.349523	NaN	1.68534		210.966	0.0516053	1	0.778815	3.11194	0.349247	0.711664	0.382995	0.58313
211.474	-0.118478	1	2.28942	3.83332	3.30316	0.470394	0.380546	0.0752013		211.477	-0.0871432	1	0.826262	2.70631	3.30475	0.145354	1.44429	0.221612		211.464	-0.10708	1	1.30615	0.481487	0.0815965	1.67631	0.571505	1.64293		211.476	-0.0388906	1	1.23967	3.187	NaN	0.283635	NaN	1.7971		211.466	0.0607472	-1	0.804871	2.90442	0.353299	0.636723	0.367896	0.678006
211.974	-0.116799	1	2.16544	3.80398	3.33354	0.478494	0.388293	0.0887597		211.977	-0.102135	1	0.749679	2.66912	3.17539	0.15037	1.69821	0.194845		211.964	-0.0897107	1	1.23005	0.43492	0.0807186	1.53455	0.543231	1.5981		211.976	-0.0147493	1	1.06159	3.00059	NaN	0.222183	NaN	1.89505		211.966	0.069526	-1	0.809633	2.72949	0.360851	0.565273	0.355302	0.78311
212.474	-0.108856	1	2.03102	3.80508	3.37384	0.485867	0.393031	0.101704		212.477	-0.11448	1	0.696331	2.57557	3.10993	0.152678	1.86511	0.179406		212.464	-0.0682879	1	1.17086	0.409525	0.0771397	1.4184	0.515098	1.5589		212.476	0.00897136	1	0.906171	2.82949	NaN	0.165729	NaN	1.98149		212.466	0.0770702	-1	0.767687	2.63284	0.375301	0.490789	0.349136	0.897612
212.974	-0.0958368	1	1.89249	3.82946	3.4197	0.492852	0.397742	0.11323		212.977	-0.121514	1	0.662378	2.45091	3.08197	0.156695	1.94817	0.174347		212.964	-0.0440792	1	1.1225	0.397972	0.0715854	1.32163	0.486243	1.5218		212.976	0.0322678	1	0.771205	2.67399	NaN	0.114836	NaN	2.05871		212.966	0.0836129	-1	0.76668	2.41132	0.38405	0.448885	0.353693	1.24876
213.474	-0.0782103	1	1.75622	3.86991	3.46672	0.499789	0.40541	0.122531		213.477	-0.123133	1	0.64398	2.32035	3.06508	0.166836	1.95059	0.178721		213.464	-0.0183092	1	1.0789	0.392928	0.0647817	1.23801	0.4558	1.48324		213.476	0.0539261	1	0.654464	2.53442	NaN	0.0700653	NaN	2.12903		213.466	0.0896359	-1	0.773667	2.16576	0.390691	0.41896	0.368234	1.68833
213.974	-0.056826	1	1.62856	3.91927	3.51051	0.507019	0.419018	0.128802		213.977	-0.119361	1	0.637297	2.20912	3.03288	0.187514	1.87556	0.19158		213.964	0.00790764	1	1.03398	0.387064	0.0574541	1.16131	0.422904	1.43967		213.976	0.072825	1	0.553723	2.41109	NaN	0.0319782	NaN	2.19475		213.966	0.0950205	-1	0.721769	2.10217	0.398015	0.384585	0.426899	2.1062
214.474	-0.0323236	1	1.51586	3.97034	3.54669	0.514879	0.441547	0.131238		214.477	-0.110684	1	0.638486	2.14244	2.95893	0.223146	1.72627	0.211975		214.464	0.0331591	1	0.981676	0.373048	0.0503286	1.08529	0.386688	1.38755		214.476	0.0890213	1	0.466759	2.30429	NaN	0.00113693	NaN	2.25815		214.466	0.0996865	-1	0.682673	1.94686	0.400422	0.376797	0.481049	2.64167
214.974	-0.00673903	1	1.42447	4.01593	3.57086	0.523711	0.475981	0.129035		214.977	-0.0958325	1	0.643709	2.14553	2.81684	0.278146	1.50592	0.238958		214.964	0.055805	1	0.915911	0.34355	0.0441309	1.00371	0.346289	1.32333		214.976	0.101782	-1	0.391347	2.21434	NaN	-0.0218968	NaN	2.32155		214.966	0.102709	-1	0.656617	1.69813	0.397823	0.39609	0.5306	3.29691
215.474	0.0179515	1	1.30782	3.95694	3.52842	0.495408	0.500066	0.133553		215.477	-0.075377	1	0.544888	2.09245	2.4676	0.381561	1.13539	0.255406		215.464	0.0757235	1	1.01075	0.318801	0.0373728	0.952757	0.331135	1.28225		215.476	0.110913	-1	0.309877	2.15002	NaN	-0.055375	NaN	2.36662		215.466	0.104396	-1	0.603979	1.65777	0.403797	0.351146	0.658039	3.61686
215.974	0.0403275	1	1.26962	3.85397	3.43565	0.453811	0.569027	0.143002		215.977	-0.0505942	1	0.7183	2.17013	2.4361	0.387987	1.08925	0.203205		215.964	0.092311	1	0.78688	0.27003	0.0385827	0.949862	0.298483	1.21007		215.976	0.116886	-1	0.29888	2.07538	NaN	-0.0512639	NaN	2.41271		215.966	0.105343	-1	0.556543	1.59716	0.411103	0.31361	0.786502	3.89919
216.474	0.0610543	1	1.25019	3.71958	3.34381	0.420296	0.608631	0.150833		216.477	-0.02489	1	0.828421	2.18787	2.39258	0.409945	0.966885	0.155376		216.464	0.106371	1	0.752736	0.25936	0.0414394	0.933719	0.27593	1.15217		216.476	0.11668	-1	0.298974	1.99471	NaN	-0.0467704	NaN	2.45103		216.466	0.104772	-1	0.531329	1.41634	0.419162	0.316202	0.892641	4.19024
216.974	0.0793233	1	1.24787	3.5678	3.2541	0.394531	0.622853	0.156657		216.977	0.000709302	1	0.888836	2.16157	2.33831	0.445051	0.799333	0.113145		216.964	0.117039	1	0.874778	0.276443	0.0463284	0.906828	0.260685	1.10496		216.976	0.110255	-1	0.305411	1.91105	NaN	-0.0418537	NaN	2.48199		216.966	0.103162	-1	0.518785	1.29239	0.429954	0.282141	0.941859	4.41861
217.474	0.0949862	1	1.261	3.41264	3.16776	0.37618	0.615665	0.160087		217.477	0.0248479	1	0.913127	2.10711	2.27457	0.49092	0.617646	0.0777375		217.464	0.123152	1	1.11946	0.31093	0.0536351	0.871687	0.249956	1.06491		217.476	0.0987505	-1	0.313444	1.82742	NaN	-0.036473	NaN	2.50599		217.466	0.101044	-1	0.511946	1.20518	0.441775	0.230931	0.958127	4.61454
217.974	0.106949	1	1.28791	3.26813	3.08599	0.364911	0.591043	0.160734		217.977	0.0480519	1	0.914879	2.04039	2.20265	0.545168	0.452871	0.0503781		217.964	0.123314	1	1.45325	0.352473	0.0637451	0.830796	0.240951	1.02843		217.976	0.0825163	-1	0.318323	1.74688	NaN	-0.0305876	NaN	2.52343		217.966	0.0973465	-1	0.486131	1.24962	0.445575	0.222113	0.917019	4.82217
218.474	0.114627	1	1.32694	3.1483	3.01002	0.36039	0.55296	0.158209		218.477	0.0691408	1	0.907676	1.97729	2.12382	0.60541	0.336057	0.0322925		218.464	0.117646	1	1.84259	0.390722	0.0770437	0.786653	0.230878	0.991965		218.476	0.0624413	-1	0.315302	1.67245	NaN	-0.0241567	NaN	2.53473		218.466	0.0935127	-1	0.445979	1.34643	0.457557	0.205163	0.923254	4.91709
218.974	0.117711	1	1.37642	3.06716	2.94106	0.362282	0.50539	0.152124		218.977	0.087019	1	0.9051	1.93369	2.03935	0.669262	0.298252	0.0247061		218.964	0.106382	1	2.25393	0.415331	0.0939165	0.741759	0.216945	0.951952		218.976	0.0395038	-1	0.29963	1.60718	NaN	-0.0171396	NaN	2.54029		218.966	0.089485	-1	0.387816	1.50903	0.479817	0.177995	0.988967	4.87043
219.474	0.11595	1	1.43469	3.03875	2.88032	0.370255	0.452308	0.142092		219.477	0.101824	1	0.920736	1.9255	1.95052	0.734339	0.370505	0.0288442		219.464	0.0905667	1	2.65375	0.415948	0.114749	0.698612	0.196361	0.904828		219.476	0.0142867	-1	0.266562	1.5541	NaN	-0.00949535	NaN	2.54051		219.466	0.0846585	-1	0.326528	1.61727	0.497985	0.236096	1.13561	4.79344
219.974	0.108588	1	1.50009	3.07707	2.82904	0.383973	0.397688	0.127722		219.977	0.113023	1	0.968166	1.96859	1.85862	0.798257	0.583863	0.0459322		219.964	0.0697452	1	3.00848	0.382227	0.139927	0.65971	0.166334	0.847026		219.976	-0.0103085	-1	0.211347	1.51626	NaN	-0.00118333	NaN	2.5358		219.966	0.0795739	-1	0.268158	1.70101	0.519281	0.304361	1.3042	4.68052
220.474	0.0955214	1	1.5165	3.08171	2.74098	0.365662	0.348545	0.115985		220.477	0.120217	1	1.05329	1.98005	1.78076	0.810555	1.00457	0.0593363		220.464	0.0453123	1	2.89562	0.332866	0.148376	0.635017	0.163729	0.829145		220.476	-0.0329722	-1	0.108331	1.46365	NaN	-0.026608	NaN	2.47992		220.466	0.0730904	-1	0.221819	1.73741	0.553967	0.350504	1.4937	4.46531
220.974	0.0773286	1	1.61352	3.18826	2.74669	0.384505	0.345207	0.099432		220.977	0.123839	1	1.06601	1.98661	1.77542	0.840586	1.00995	0.0239703		220.964	0.0190793	1	2.7783	0.37845	0.15296	0.593918	0.153926	0.781583		220.976	-0.0541045	-1	0.0942471	1.43905	NaN	0.0125207	NaN	2.54595		220.966	0.0654956	-1	0.197519	1.64804	0.577136	0.389387	1.55019	4.48676
221.474	0.0554688	1	1.65243	3.23504	2.75257	0.405243	0.342486	0.0904901		221.477	0.120463	1	1.04591	2.02486	1.7387	0.874435	1.06248	0.0030073		221.464	-0.00662834	1	2.64122	0.405703	0.155926	0.557179	0.146076	0.740834		221.476	-0.0729628	-1	0.0932161	1.40417	NaN	0.0354033	NaN	2.59422		221.466	0.0584836	-1	0.18693	1.48421	0.593371	0.422858	1.52666	4.65022
221.974	0.0315035	1	1.64498	3.23308	2.758	0.426235	0.339837	0.0875123		221.977	0.110359	1	0.999755	2.0913	1.67665	0.908378	1.14122	-0.00397517		221.964	-0.0312492	1	2.48867	0.419099	0.156895	0.524052	0.139598	0.705301		221.976	-0.0891861	-1	0.101758	1.36112	NaN	0.0484764	NaN	2.62747		221.966	0.0508123	-1	0.190165	1.46226	0.615865	0.399295	1.57836	4.65784
222.474	0.00686222	1	1.60291	3.1934	2.76239	0.445845	0.336715	0.0888518		222.477	0.0950374	1	0.934346	2.18243	1.59536	0.938692	1.22526	0.00260063		222.464	-0.0536327	1	2.32498	0.423111	0.155489	0.49379	0.13391	0.673383		222.476	-0.102953	-1	0.116392	1.31204	NaN	0.0581766	NaN	2.64842		222.466	0.0420717	-1	0.189235	1.38771	0.62781	0.384602	1.59771	4.72572
222.974	-0.0177185	1	1.53798	3.12703	2.76515	0.462433	0.332575	0.0928616		222.977	0.0753425	1	0.856468	2.29475	1.50087	0.961654	1.29368	0.0223124		222.964	-0.0743451	1	2.15445	0.422214	0.151331	0.465648	0.128429	0.64348		222.976	-0.112271	-1	0.133639	1.25904	NaN	0.0709405	NaN	2.65979		222.966	0.033141	-1	0.181852	1.23163	0.623406	0.383657	1.56695	4.88699
223.474	-0.0410419	1	1.46194	3.04499	2.76566	0.474361	0.326875	0.0978949		223.477	0.0522624	1	0.772906	2.42478	1.39927	0.973542	1.32555	0.0547378		223.464	-0.0923252	1	1.98138	0.42088	0.144042	0.438877	0.122572	0.613993		223.476	-0.11688	-1	0.150019	1.20425	NaN	0.0932045	NaN	2.66431		223.466	0.0239102	-1	0.188034	1.17631	0.614263	0.367212	1.61254	4.86119
223.974	-0.0618981	1	1.38653	2.9583	2.76334	0.47999	0.319068	0.102305		223.977	0.026875	1	0.69045	2.56903	1.29661	0.97063	1.29995	0.0994546		223.964	-0.106725	1	1.81009	0.423584	0.133246	0.41273	0.115758	0.583322		223.976	-0.116672	-1	0.162052	1.1498	NaN	0.131405	NaN	2.66471		223.966	0.0142695	-1	0.199543	1.15473	0.602028	0.342425	1.66525	4.79803
224.474	-0.0801323	1	1.32349	2.878	2.75759	0.477682	0.308612	0.104444		224.477	-6.66797e-05	1	0.615885	2.72399	1.19896	0.949197	1.19596	0.156041		224.464	-0.116914	1	1.64488	0.4348	0.118563	0.386462	0.107405	0.549868		224.476	-0.111066	-1	0.166258	1.09781	NaN	0.191979	NaN	2.6637		224.466	0.00522031	-1	0.216935	1.1459	0.581211	0.298947	1.6298	4.84533
224.974	-0.0952387	1	1.28459	2.81511	2.7478	0.465798	0.294961	0.102667		224.977	-0.0256617	1	0.556	2.88617	1.11239	0.905519	0.992657	0.224073		224.964	-0.122644	1	1.49007	0.459001	0.0996158	0.359325	0.0969291	0.512031		224.976	-0.0998922	-1	0.159158	1.05041	NaN	0.281363	NaN	2.66402		224.966	-0.00535015	-1	0.253286	1.17951	0.569386	0.248907	1.63628	4.79869
225.474	-0.107037	1	1.25974	2.79045	2.6897	0.481833	0.322494	0.0800007		225.477	-0.0488221	1	0.52975	2.91481	1.05606	0.942112	0.805383	0.221565		225.464	-0.123519	1	1.26485	0.460257	0.119525	0.309116	0.0725143	0.487238		225.476	-0.0832012	-1	0.183865	1.02098	NaN	0.298269	NaN	2.68674		225.466	-0.0161194	-1	0.304874	1.24723	0.56479	0.193593	1.67647	4.67655
225.974	-0.115522	1	1.17828	2.79008	2.81612	0.487997	0.291301	0.103847		225.977	-0.0690896	1	0.480534	3.03934	0.95589	1.08508	0.926874	0.232559		225.964	-0.118569	1	1.21164	0.504929	0.0691284	0.301244	0.0662952	0.430592		225.976	-0.0618084	-1	0.180619	0.975533	NaN	0.422073	NaN	2.68559		225.966	-0.0261194	-1	0.326331	1.24853	0.569464	0.179607	1.72455	4.65822
226.474	-0.118995	1	1.09531	2.82357	2.84053	0.491551	0.300241	0.130901		226.477	-0.0872894	1	0.426581	3.10438	0.870514	1.17584	1.04443	0.252706		226.464	-0.107076	1	1.17106	0.531815	0.0401043	0.286447	0.0596399	0.389356		226.476	-0.0383654	-1	0.202202	0.951567	NaN	0.496995	NaN	2.68899		226.466	-0.0360687	-1	0.338992	1.25612	0.576092	0.168934	1.79047	4.60047
226.974	-0.116578	1	1.02002	2.88287	2.78299	0.494459	0.341179	0.158269		226.977	-0.102637	1	0.37571	3.12032	0.798961	1.22594	1.15447	0.278406		226.964	-0.0901576	1	1.14056	0.544419	0.0273929	0.266526	0.0529859	0.36025		226.976	-0.0141153	-1	0.246185	0.941848	NaN	0.539078	NaN	2.69132		226.966	-0.0456292	-1	0.337876	1.28225	0.585526	0.160482	1.88961	4.45735
227.474	-0.108625	1	0.961614	2.95989	2.66353	0.498688	0.405982	0.183056		227.477	-0.11487	1	0.335738	3.0976	0.740267	1.2469	1.25342	0.306059		227.464	-0.0689849	1	1.11755	0.546245	0.0259341	0.243283	0.0467707	0.339995		227.476	0.01028	-1	0.310139	0.939137	NaN	0.564365	NaN	2.68696		227.466	-0.0543698	-1	0.305138	1.26198	0.59073	0.169376	1.94577	4.45604
227.974	-0.0953148	1	0.929289	3.04657	2.50219	0.506201	0.486516	0.202368		227.977	-0.121774	1	0.314485	3.04662	0.693467	1.25028	1.33769	0.332064		227.964	-0.0449494	1	1.09948	0.540795	0.030668	0.218519	0.0414315	0.32531		227.976	0.0338561	-1	0.391633	0.936196	NaN	0.5889	NaN	2.67026		227.966	-0.0630721	-1	0.263003	1.22854	0.591884	0.186229	1.9813	4.52236
228.474	-0.0773299	1	0.932243	3.13485	2.31902	0.518964	0.574647	0.213311		228.477	-0.123146	1	0.319768	2.97781	0.657595	1.24759	1.40371	0.352822		228.464	-0.0191309	1	1.08379	0.531575	0.0365345	0.194038	0.0374059	0.312915		228.476	0.055538	-1	0.488237	0.925785	NaN	0.628727	NaN	2.63562		228.466	-0.0698643	-1	0.232639	1.21637	0.576526	0.214776	1.98199	4.70095
228.974	-0.0555991	1	0.979672	3.21665	2.13406	0.538941	0.662242	0.21299		228.977	-0.118979	1	0.359406	2.90158	0.631687	1.2504	1.44789	0.364733		228.964	0.00744656	1	1.0679	0.522087	0.0384738	0.17164	0.0351312	0.29953		228.976	0.0742676	-1	0.597522	0.900667	NaN	0.699888	NaN	2.57739		228.966	-0.0753291	-1	0.205722	1.19075	0.562128	0.241862	1.95552	4.9165
229.474	-0.0309781	1	1.08077	3.2839	1.96735	0.568098	0.741167	0.198511		229.477	-0.109989	1	0.441217	2.82834	0.614776	1.27022	1.46666	0.364196		229.464	0.0324385	1	1.04925	0.515835	0.0314257	0.153127	0.0350448	0.281875		229.476	0.0901601	-1	0.717056	0.853603	NaN	0.818429	NaN	2.48995		229.466	-0.0801729	-1	0.181911	1.153	0.548595	0.267631	1.90456	5.16536
229.974	-0.00555736	1	1.24475	3.32855	1.83893	0.608399	0.803287	0.16698		229.977	-0.0950471	1	0.57302	2.76851	0.605897	1.3186	1.45643	0.34761		229.964	0.0553116	1	1.02528	0.516323	0.0103302	0.1403	0.0375842	0.25667		229.976	0.102861	1	0.844412	0.777355	NaN	1.00039	NaN	2.36767		229.966	-0.0839092	-1	0.17151	1.12971	0.529667	0.307661	1.87902	5.4639
230.474	0.0186985	1	1.3123	3.38117	1.80981	0.685854	0.873875	0.155041		230.477	-0.0748901	1	0.690129	2.91292	0.622824	1.41748	1.97258	0.378107		230.464	0.0755825	1	1.1701	0.527756	0.014605	0.12839	0.0338871	0.235211		230.476	0.112211	1	1.02085	0.700171	NaN	1.14098	NaN	2.28443		230.466	-0.0862971	-1	0.161038	1.11023	0.513489	0.341628	1.8596	5.71237
230.974	0.0415766	1	1.49798	3.45169	1.84102	0.797739	0.834117	0.138667		230.977	-0.0504487	1	0.781896	2.71894	0.572749	1.50457	1.46851	0.322158		230.964	0.0919371	1	1.03516	0.523809	-0.0130486	0.132187	0.0323702	0.214956		230.976	0.117998	1	1.17402	0.569533	NaN	1.36384	NaN	2.14188		230.966	-0.0880258	-1	0.147204	1.09696	0.50553	0.356908	1.84961	5.82265
231.474	0.0621121	1	1.61302	3.51627	1.86097	0.921717	0.801053	0.128995		231.477	-0.0245314	1	0.848469	2.58728	0.534215	1.5947	1.14315	0.285137		231.464	0.106137	1	0.972233	0.520477	-0.0285615	0.12886	0.0328448	0.200464		231.476	0.117855	1	1.25452	0.466759	NaN	1.50943	NaN	2.07146		231.466	-0.0874849	-1	0.125333	1.0773	0.498789	0.386765	1.84585	5.96403
231.974	0.0799758	1	1.67363	3.57402	1.86922	1.05367	0.774128	0.124751		231.977	0.00165189	1	0.894719	2.51405	0.504652	1.68366	0.962084	0.263947		231.964	0.117158	1	0.981	0.519767	-0.0344345	0.12052	0.0347739	0.190039		231.976	0.11149	1	1.2745	0.388175	NaN	1.59176	NaN	2.05741		231.966	-0.0861662	-1	0.0998083	1.05679	0.493629	0.421	1.84256	6.11387
232.474	0.0952054	1	1.69604	3.62401	1.86531	1.18947	0.752785	0.124661		232.477	0.0264187	1	0.925522	2.49539	0.481491	1.76727	0.890916	0.255489		232.464	0.122786	1	1.06115	0.523686	-0.0331685	0.109283	0.0376205	0.18198		232.476	0.0998581	1	1.24608	0.330106	NaN	1.62487	NaN	2.08398		232.466	-0.0846956	-1	0.0767054	1.07589	0.507074	0.409322	1.79413	6.14944
232.974	0.106896	1	1.69645	3.66535	1.8488	1.325	0.73647	0.127452		232.977	0.0501738	1	0.945749	2.52743	0.462163	1.84132	0.895239	0.256664		232.964	0.122755	1	1.21237	0.53424	-0.0272641	0.0972616	0.0408476	0.174588		232.976	0.0835092	1	1.18142	0.28888	NaN	1.62278	NaN	2.13543		232.966	-0.0821089	-1	0.0595086	1.07109	0.51777	0.415992	1.76937	6.20584
233.474	0.114562	1	1.69109	3.69713	1.81922	1.45615	0.724626	0.131849		233.477	0.071707	1	0.960274	2.60628	0.444097	1.90163	0.940649	0.264375		233.464	0.116986	1	1.43435	0.553436	-0.0192222	0.0865705	0.0439182	0.166166		233.476	0.0632598	1	1.09266	0.26082	NaN	1.59951	NaN	2.19599		233.466	-0.0784319	-1	0.0496482	1.03662	0.525052	0.445453	1.77401	6.28811
233.974	0.117927	1	1.69616	3.71843	1.77614	1.57878	0.716697	0.136579		233.977	0.0899638	1	0.97397	2.72809	0.424725	1.94401	0.992742	0.275522		233.964	0.105636	1	1.72677	0.583279	-0.0115435	0.0793232	0.0462954	0.155015		233.976	0.0400508	1	0.991923	0.242253	NaN	1.56909	NaN	2.24992		233.966	-0.073614	-1	0.0490223	1.03207	0.542509	0.44999	1.76821	6.26226
234.474	0.116157	1	1.72788	3.72835	1.7191	1.68879	0.712128	0.140369		234.477	0.104565	1	0.991711	2.88896	0.401477	1.96425	1.01711	0.287008		234.464	0.090048	1	2.08931	0.625778	-0.00672876	0.0776336	0.0474421	0.139435		234.476	0.0144369	1	0.891363	0.229505	NaN	1.54555	NaN	2.28147		234.466	-0.067528	-1	0.0525423	1.0185	0.559442	0.458559	1.78691	6.19485
234.974	0.108958	1	1.80248	3.72597	1.64765	1.78205	0.710363	0.141944		234.977	0.115013	1	1.01837	3.08504	0.371783	1.95816	0.979357	0.295733		234.964	0.0690031	1	2.52167	0.682937	-0.00727884	0.0836156	0.0468214	0.117727		234.976	-0.0104276	1	0.803117	0.218901	NaN	1.54291	NaN	2.27488		234.966	-0.061894	-1	0.0639753	0.955263	0.568008	0.496846	1.89465	6.0582
235.474	0.0958656	1	1.79457	3.62322	1.54876	1.92852	0.73201	0.137104		235.477	0.121182	1	0.96199	3.23657	0.318208	1.97306	1.14759	0.335638		235.464	0.0440566	1	2.70302	0.708523	-0.000750553	0.0840089	0.0471999	0.105127		235.476	-0.0332149	1	0.770837	0.15856	NaN	1.57671	NaN	2.18812		235.466	-0.0557191	-1	0.0791714	0.951007	0.583929	0.517052	1.95327	5.9132
235.974	0.0780357	1	1.99704	3.68409	1.48177	1.95243	0.702827	0.130033		235.977	0.123962	1	0.964128	3.27185	0.301559	1.88934	1.00603	0.306137		235.964	0.0179002	1	2.73236	0.719397	0.00440633	0.064197	0.0415167	0.0930534		235.976	-0.0544206	1	0.679856	0.162104	NaN	1.55493	NaN	2.1969		235.966	-0.0479676	-1	0.0967795	0.984553	0.604563	0.525668	1.98041	5.76285
236.474	0.0564359	1	2.12512	3.7047	1.41429	1.99121	0.677006	0.123477		236.477	0.119893	1	0.964852	3.23589	0.285806	1.82861	0.948541	0.293955		236.464	-0.00795856	1	2.70707	0.727171	0.00831948	0.0512798	0.0368857	0.0837065		236.476	-0.0733528	1	0.601138	0.165187	NaN	1.54282	NaN	2.19565		236.466	-0.0399838	-1	0.139507	1.04206	0.61063	0.487479	2.10181	5.62503
236.974	0.032742	1	2.18907	3.69764	1.34706	2.04376	0.65359	0.117164		236.977	0.109485	1	0.96706	3.14393	0.271031	1.78515	0.955182	0.294421		236.964	-0.0326941	1	2.63441	0.732253	0.0110116	0.0451517	0.0332395	0.0767445		236.976	-0.08972	1	0.535659	0.167471	NaN	1.53829	NaN	2.18582		236.966	-0.0314506	-1	0.181084	1.09453	0.619314	0.448087	2.19191	5.51796
237.474	0.00795711	1	2.19914	3.67548	1.28083	2.10895	0.631618	0.110822		237.477	0.0938088	1	0.973653	3.01122	0.257317	1.75325	1.00601	0.302866		237.464	-0.0546513	1	2.52167	0.735053	0.0125053	0.0457072	0.0305107	0.0718253		237.476	-0.103766	-1	0.484394	0.16862	NaN	1.53926	NaN	2.16885		237.466	-0.02211	-1	0.219299	1.13697	0.633334	0.409157	2.2226	5.46359
237.974	-0.0164902	1	2.1656	3.6508	1.21635	2.18568	0.610132	0.104179		237.977	0.0737054	1	0.987532	2.85298	0.244744	1.72717	1.0811	0.314617		237.964	-0.0750865	1	2.37613	0.735982	0.0128232	0.0528406	0.028632	0.068607		237.976	-0.113286	-1	0.448317	0.168296	NaN	1.54367	NaN	2.1462		237.966	-0.0128496	-1	0.271098	1.20946	0.646462	0.345991	2.30421	5.3583
238.474	-0.0394583	1	2.09871	3.6362	1.15436	2.27284	0.588172	0.0969636		238.477	0.0502704	1	1.0116	2.68447	0.233396	1.7012	1.16049	0.325003		238.464	-0.0928348	1	2.20505	0.735448	0.0119882	0.0664463	0.0275358	0.0667476		238.476	-0.118047	-1	0.428405	0.166162	NaN	1.54944	NaN	2.11931		238.466	-0.00260879	-1	0.326805	1.26821	0.658299	0.280271	2.38792	5.23846
238.974	-0.0597567	1	2.00873	3.64425	1.0956	2.36933	0.564781	0.0889027		238.977	0.0245927	1	1.04875	2.52093	0.223352	1.66963	1.22425	0.329354		238.964	-0.107033	1	2.01572	0.733862	0.0100228	0.0864187	0.0271549	0.065905		238.976	-0.117931	-1	0.425632	0.161879	NaN	1.55448	NaN	2.08963		238.966	0.00849011	-1	0.373513	1.14433	0.663205	0.262709	2.34681	5.15308
239.474	-0.0779251	1	1.90592	3.68754	1.04082	2.47402	0.538998	0.0797246		239.477	-0.00263465	1	1.10188	2.37759	0.214695	1.62673	1.25245	0.322999		239.464	-0.116828	1	1.81542	0.731632	0.00694967	0.112652	0.0274218	0.0657373		239.476	-0.112218	-1	0.440973	0.155112	NaN	1.55672	NaN	2.05862		239.466	0.0195335	-1	0.416897	1.03947	0.668987	0.240138	2.31927	5.07555
239.974	-0.0931138	1	1.80055	3.77864	0.990764	2.58583	0.509864	0.0691571		239.977	-0.0283073	1	1.1739	2.26969	0.207508	1.56679	1.22514	0.301267		239.964	-0.12219	1	1.61142	0.729169	0.00279156	0.145042	0.0282691	0.0659025		239.976	-0.100964	-1	0.475404	0.145522	NaN	1.55409	NaN	2.0277		239.966	0.0308016	-1	0.457101	0.952804	0.675606	0.212775	2.30472	5.00554
240.474	-0.105342	1	1.77445	3.75775	0.952214	2.68852	0.476648	0.0575494		240.477	-0.0515263	1	1.19467	2.13177	0.194951	1.50856	1.17569	0.283665		240.464	-0.122653	1	1.392	0.669004	-0.0447094	0.190322	0.0424985	0.0599287		240.476	-0.0840694	-1	0.511463	0.0971271	NaN	1.47406	NaN	1.99831		240.466	0.0413596	-1	0.460414	0.804959	0.693261	0.207101	2.25905	4.99957
240.974	-0.11409	1	1.61323	4.02524	0.906878	2.7719	0.448851	0.05165		240.977	-0.0716219	1	1.18116	2.08297	0.191142	1.42957	1.10019	0.286005		240.964	-0.118046	1	1.29296	0.692677	-0.0172461	0.174327	0.0341739	0.0469424		240.976	-0.062637	-1	0.536357	0.136333	NaN	1.54611	NaN	1.95358		240.966	0.0515288	-1	0.466706	0.693853	0.715284	0.203521	2.22262	4.99427
241.474	-0.118045	1	1.4871	4.17865	0.871372	2.85567	0.427096	0.0481819		241.477	-0.0892994	1	1.13289	2.04415	0.173822	1.36173	1.00335	0.283804		241.464	-0.106575	1	1.19559	0.699555	0.000721119	0.159896	0.0295424	0.0366582		241.476	-0.0391276	-1	0.576732	0.1622	NaN	1.57202	NaN	1.91896		241.466	0.0613683	-1	0.488987	0.684461	0.744961	0.199634	2.21557	4.97505
241.974	-0.116105	1	1.39273	4.23874	0.843626	2.93773	0.411691	0.0466526		241.977	-0.104044	1	1.06159	2.01387	0.147933	1.30537	0.894455	0.278073		241.964	-0.0895602	1	1.10202	0.693604	0.0112952	0.146951	0.0278333	0.0285901		241.976	-0.0147523	-1	0.629842	0.175494	NaN	1.5658	NaN	1.89236		241.966	0.0698088	-1	0.522295	0.594747	0.789919	0.243301	2.21894	4.97243
242.474	-0.10908	1	1.32678	4.22623	0.821573	3.01598	0.402943	0.0465693		242.477	-0.115819	1	0.979019	1.99067	0.11842	1.26083	0.782789	0.269822		242.464	-0.0681195	1	1.0144	0.678787	0.016579	0.135413	0.0282759	0.0222524		242.476	0.00993364	-1	0.692941	0.176983	NaN	1.54147	NaN	1.87171		242.466	0.0779407	-1	0.561651	0.483341	0.841128	0.304267	2.23063	4.97464
242.974	-0.0965707	1	1.28591	4.16187	0.803143	3.08831	0.40116	0.0474396		242.977	-0.122257	1	0.896906	1.97313	0.0902265	1.22845	0.677639	0.260062		242.964	-0.0439807	1	0.934869	0.65907	0.0186756	0.125203	0.0300995	0.0171593		242.976	0.0336639	1	0.763281	0.167435	NaN	1.51305	NaN	1.85494		242.966	0.0847883	-1	0.612686	0.540621	0.884327	0.31592	2.28279	4.9458
243.474	-0.0792272	1	1.26679	4.06641	0.786269	3.15262	0.406648	0.0487709		243.477	-0.123275	1	0.826997	1.95978	0.0682952	1.20855	0.588293	0.249802		243.464	-0.0182222	1	0.865563	0.638417	0.0196879	0.116244	0.0325334	0.0128249		243.476	0.0553827	1	0.838117	0.147616	NaN	1.49456	NaN	1.83997		243.466	0.0910348	-1	0.644383	0.607611	0.927922	0.31623	2.3377	4.92101
243.974	-0.0579281	1	1.26607	3.96058	0.768881	3.2068	0.419716	0.0500705		243.977	-0.118923	1	0.781032	1.9492	0.0575703	1.20148	0.524035	0.240054		243.964	0.00809988	1	0.808626	0.620795	0.0217187	0.108455	0.0348068	0.00876342		243.976	0.0740088	1	0.914703	0.118293	NaN	1.50003	NaN	1.82473		243.966	0.0964787	-1	0.653992	0.685693	0.971969	0.303582	2.39574	4.90083
244.474	-0.0335979	1	1.28042	3.86514	0.74891	3.24876	0.440669	0.050846		244.477	-0.109716	1	0.770753	1.93994	0.0629952	1.20757	0.494153	0.231827		244.464	0.0331175	1	0.766196	0.610167	0.0268711	0.101758	0.0361491	0.00448898		244.476	0.0900598	1	0.990291	0.0802344	NaN	1.54345	NaN	1.80714		244.466	0.100524	-1	0.635605	0.855277	0.990283	0.218081	2.41326	4.83884
244.974	-0.00855373	1	1.3065	3.80082	0.724289	3.2764	0.469817	0.0506046		244.977	-0.0947027	1	0.807901	1.93055	0.0895137	1.22714	0.507932	0.226133		244.964	0.0559704	1	0.740416	0.610498	0.0372481	0.0960759	0.0357896	-0.000484221		244.976	0.102828	1	1.06214	0.0342068	NaN	1.63886	NaN	1.78512		244.966	0.103271	-1	0.604029	0.9711	1.00668	0.138883	2.4092	4.7875
245.474	0.0152042	1	1.36655	3.77693	0.71084	3.32642	0.526005	0.0523083		245.477	-0.0745403	1	0.842567	1.87245	0.0960784	1.28262	0.431608	0.253598		245.464	0.0762121	1	0.79623	0.612326	0.025856	0.118912	0.0573565	-0.0127661		245.476	0.112196	1	1.12657	0.0638768	NaN	1.75026	NaN	1.69293		245.466	0.104949	-1	0.547472	0.891141	1.02936	0.111034	2.36189	4.78575
245.974	0.0382118	1	1.40823	3.74339	0.680314	3.42443	0.587095	0.0606147		245.977	-0.0497212	1	0.92227	1.85084	0.101	1.35537	0.435689	0.291996		245.964	0.0923209	1	0.716638	0.594837	0.0620119	0.100948	0.0365225	-0.0139265		245.976	0.117728	1	1.58676	0.0788369	NaN	2.01226	NaN	1.60717		245.966	0.104764	-1	0.506026	0.88214	1.05981	0.0836414	2.32512	4.78068
246.474	0.0588224	1	1.42719	3.73547	0.65512	3.4996	0.626278	0.0717192		246.477	-0.0238733	1	0.984453	1.81325	0.101987	1.36837	0.435188	0.285894		246.464	0.106348	1	0.663877	0.577932	0.0786802	0.0904729	0.0251527	-0.012528		246.476	0.117436	1	1.9794	0.134371	NaN	2.22399	NaN	1.53636		246.466	0.103905	-1	0.472969	0.906982	1.09455	0.0572512	2.29398	4.77326
246.974	0.0768963	1	1.42838	3.74855	0.633481	3.56135	0.647847	0.0840498		246.977	0.00197608	1	1.03065	1.76437	0.0999795	1.33491	0.432427	0.249325		246.964	0.11714	1	0.642188	0.563551	0.0802693	0.0856832	0.0211959	-0.00939492		246.976	0.11089	1	2.29417	0.221294	NaN	2.38391	NaN	1.47623		246.966	0.102494	-1	0.462304	0.737719	1.1391	0.0719434	2.2661	4.73274
247.474	0.0925134	1	1.41675	3.77806	0.613622	3.61909	0.656095	0.0960345		247.477	0.0264977	1	1.0624	1.70892	0.095921	1.26823	0.429725	0.196323		247.464	0.122889	1	0.655817	0.55363	0.0711879	0.0847748	0.022601	-0.00535161		247.476	0.0993597	1	2.52073	0.330421	NaN	2.49048	NaN	1.42251		247.466	0.0995356	-1	0.46569	0.601779	1.17901	0.098493	2.25542	4.68748
247.974	0.104627	1	1.39723	3.81938	0.593766	3.68223	0.655317	0.106102		247.977	0.0499977	1	1.08123	1.65161	0.0907534	1.1816	0.429406	0.140922		247.964	0.12295	1	0.709004	0.55011	0.0558443	0.0859436	0.0273167	-0.0012223		247.976	0.0829942	1	2.64876	0.452568	NaN	2.54216	NaN	1.37093		247.966	0.0963488	-1	0.488917	0.512887	1.21235	0.141785	2.26901	4.63554
248.474	0.112772	1	1.37478	3.86793	0.572139	3.76019	0.649804	0.112679		248.477	0.0713371	1	1.08869	1.59714	0.0854188	1.08828	0.433791	0.0971556		248.464	0.117248	1	0.805993	0.554927	0.0386471	0.0873857	0.033292	0.00216874		248.476	0.0626357	1	2.66795	0.57855	NaN	2.53743	NaN	1.31724		248.466	0.0937115	-1	0.475924	0.315159	1.22348	0.210481	2.27559	4.62598
248.974	0.116657	1	1.35434	3.91912	0.546962	3.86239	0.643851	0.114195		248.977	0.0895012	1	1.0863	1.55021	0.0808595	1.00153	0.445201	0.0790567		248.964	0.105975	1	0.951026	0.57002	0.0240048	0.087297	0.0384756	0.00399723		248.976	0.039254	1	2.56798	0.699182	NaN	2.47475	NaN	1.25715		248.966	0.0897048	-1	0.452826	0.13333	1.2226	0.276445	2.28848	4.62715
249.474	0.11531	1	1.34087	3.96834	0.516461	3.99824	0.641752	0.109077		249.477	0.103781	1	1.0756	1.51555	0.0780177	0.934604	0.465957	0.100659		249.464	0.090485	1	1.14835	0.597328	0.0163257	0.0838735	0.0408163	0.0034389		249.476	0.0135836	1	2.33851	0.805281	NaN	2.35257	NaN	1.18641		249.466	0.0856933	-1	0.424531	0.122805	1.19501	0.306373	2.33375	4.62998
249.974	0.108678	1	1.33929	4.01102	0.47886	4.17717	0.6478	0.0957541		249.977	0.114267	1	1.05813	1.49785	0.0778354	0.900772	0.498382	0.175997		249.964	0.0694593	1	1.4022	0.638789	0.0200186	0.0753112	0.0382631	-0.000330515		249.976	-0.0112768	1	1.96922	0.88766	NaN	2.16937	NaN	1.10074		249.966	0.0806938	-1	0.400059	0.120028	1.1723	0.326788	2.34673	4.62084
250.474	0.0961944	1	1.41222	4.00847	0.454235	4.13757	0.645892	0.102595		250.477	0.120731	1	0.914891	1.56638	0.0146615	0.861045	0.490442	0.337664		250.464	0.0444223	1	1.57797	0.642293	0.0302558	0.0900777	0.0327146	0.00977476		250.476	-0.0338927	1	2.10245	1.65686	NaN	2.18583	NaN	1.05626		250.466	0.0742992	-1	0.378255	0.122662	1.15298	0.34056	2.33717	4.60335
250.974	0.0786388	1	1.47325	3.99818	0.433261	4.17542	0.628926	0.0972657		250.977	0.12421	1	1.06113	1.51004	0.0813045	0.850646	0.537972	0.25621		250.964	0.0182245	1	1.71113	0.683546	0.034303	0.100491	0.0364128	0.00936956		250.976	-0.0549547	1	2.29475	2.19989	NaN	2.22519	NaN	1.03187		250.966	0.0678959	-1	0.417993	0.141922	1.14181	0.239977	2.28674	4.57769
251.474	0.0573907	1	1.49444	3.99935	0.411877	4.21006	0.605647	0.0941311		251.477	0.120502	1	1.13537	1.4961	0.136092	0.830853	0.605754	0.210044		251.464	-0.0078457	1	1.76906	0.712598	0.036723	0.105267	0.0391855	0.0082766		251.476	-0.0736738	1	2.77171	2.57797	NaN	2.24488	NaN	0.99273		251.466	0.0603814	-1	0.469959	0.141137	1.13126	0.200449	2.27156	4.52645
251.974	0.0339875	1	1.4832	4.01075	0.390212	4.24324	0.577872	0.0926973		251.977	0.110241	1	1.14882	1.51633	0.178454	0.803129	0.685895	0.192538		251.964	-0.0327975	1	1.76037	0.730775	0.0383073	0.10544	0.0409215	0.00685101		251.976	-0.089797	1	3.41834	2.81471	NaN	2.24891	NaN	0.947277		251.966	0.0514889	-1	0.540387	0.106594	1.12152	0.265645	2.31611	4.43301
252.474	0.00922503	1	1.44691	4.03114	0.368398	4.27668	0.547414	0.0924701		252.477	0.0942507	1	1.11273	1.56247	0.207818	0.768934	0.770506	0.197066		252.464	-0.0548538	1	1.69364	0.739408	0.0398473	0.102043	0.0415099	0.00544797		252.476	-0.103475	1	4.11963	2.93375	NaN	2.24127	NaN	0.903954		252.466	0.0428878	1	0.636078	0.00531542	1.10261	0.406866	2.39733	4.29461
252.974	-0.0152436	1	1.39299	4.05929	0.346568	4.31214	0.516089	0.0929555		252.977	0.0740361	1	1.03832	1.62626	0.223613	0.729732	0.851693	0.217002		252.964	-0.0752875	1	1.57748	0.739823	0.0421345	0.0961127	0.0408398	0.00442263		252.976	-0.11266	1	4.76059	2.95871	NaN	2.22596	NaN	0.871203		252.966	0.0335644	1	0.75337	-0.0867346	1.06072	0.600767	2.49392	4.1148
253.474	-0.0383385	1	1.32881	4.09395	0.324852	4.35134	0.485711	0.0936593		253.477	0.0506651	1	0.936838	1.69946	0.225268	0.686984	0.921566	0.245718		253.464	-0.0929043	1	1.42049	0.733349	0.0459604	0.0886819	0.0388002	0.00413015		253.476	-0.117139	1	5.22621	2.91322	NaN	2.20697	NaN	0.857466		253.466	0.0235558	1	0.958223	0.00540446	0.892208	0.980896	2.61738	3.76051
253.974	-0.0589088	1	1.2618	4.13389	0.303381	4.39604	0.458096	0.0940875		253.977	0.0251761	1	0.819506	1.77382	0.212211	0.642151	0.972234	0.276589		253.964	-0.106797	1	1.23126	0.721314	0.0521164	0.0807855	0.03528	0.00492569		253.976	-0.116815	1	5.4015	2.82091	NaN	2.1883	NaN	0.871185		253.966	0.0137459	1	1.36092	0.242775	0.723755	1.26061	2.67689	3.39689
254.474	-0.0771239	1	1.19933	4.17787	0.282287	4.44796	0.435059	0.0937459		254.477	-0.00226164	1	0.69756	1.84107	0.183871	0.596696	0.995806	0.302987		254.464	-0.11675	1	1.01839	0.705047	0.0613938	0.0734579	0.0301683	0.00716441		254.476	-0.111157	-1	5.17145	2.70541	NaN	2.17395	NaN	0.920803		254.466	0.00385582	1	1.93753	0.607802	0.555359	1.45206	2.68019	3.02508
254.974	-0.0923857	1	1.14882	4.22467	0.261702	4.50885	0.418413	0.0921403		254.977	-0.0277816	1	0.582232	1.89298	0.139677	0.552081	0.984389	0.318287		254.964	-0.122169	1	0.790481	0.685876	0.0745843	0.0677337	0.0233542	0.0112015		254.976	-0.0999849	-1	4.42107	2.59035	NaN	2.1679	NaN	1.01476		254.966	-0.00681213	1	2.45993	0.970122	0.420225	1.46752	2.65634	2.73195
255.474	-0.104594	1	1.14183	4.11416	0.242987	4.57709	0.371059	0.0835984		255.477	-0.0508139	1	0.485162	1.90135	0.0885617	0.536575	1.12921	0.317202		255.464	-0.122751	1	0.66579	0.681648	0.0559822	0.0665915	0.0470364	0.0377791		255.476	-0.0832627	-1	3.38427	2.5531	NaN	2.04586	NaN	1.16429		255.466	-0.0170405	1	2.97696	1.33217	0.288381	1.46558	2.6298	2.44661
255.974	-0.113088	1	1.05618	4.24051	0.225844	4.59582	0.402815	0.0958685		255.977	-0.0704997	1	0.440572	1.97208	0.178448	0.482228	1.01154	0.334582		255.964	-0.118577	1	0.570273	0.676972	0.0446561	0.0708274	0.0586123	0.0370274		255.976	-0.0619923	-1	2.83851	2.3828	NaN	2.18132	NaN	1.30534		255.966	-0.0277209	1	3.5671	1.65352	0.227016	1.37581	2.62029	2.16127
256.474	-0.117089	1	0.98858	4.31423	0.218643	4.64479	0.414617	0.103913		256.477	-0.0880263	1	0.409916	2.0371	0.246386	0.465741	0.969947	0.34033		256.464	-0.107303	1	0.478996	0.672409	0.039397	0.076966	0.0644856	0.0358057		256.476	-0.0385443	-1	2.36886	2.25861	NaN	2.24081	NaN	1.42277		256.466	-0.0382283	1	4.13173	1.91095	0.193121	1.26661	2.61506	1.89401
256.974	-0.115425	1	0.93492	4.34058	0.21954	4.71847	0.41054	0.108853		256.977	-0.102892	1	0.391925	2.09198	0.291758	0.480852	0.993019	0.33664		256.964	-0.0902304	1	0.392851	0.667088	0.0392436	0.0838738	0.0659358	0.0340441		256.976	-0.0141677	-1	1.96957	2.17237	NaN	2.241	NaN	1.51924		256.966	-0.0472479	1	4.39133	1.86391	0.181233	1.21991	2.60085	1.73657
257.474	-0.108481	1	0.891107	4.32481	0.226691	4.81133	0.394656	0.111811		257.477	-0.115469	1	0.385331	2.1323	0.313946	0.521297	1.06933	0.325711		257.464	-0.0691061	1	0.312731	0.660134	0.0432345	0.0904168	0.0642425	0.0316727		257.476	0.0103961	-1	1.63485	2.11588	NaN	2.19856	NaN	1.59741		257.466	-0.0557687	1	4.53637	1.8096	0.173529	1.20811	2.58546	1.60765
257.974	-0.096106	1	0.85304	4.27219	0.23825	4.91782	0.37104	0.113906		257.977	-0.122434	1	0.388865	2.15364	0.312332	0.580812	1.18744	0.30974		257.964	-0.0450505	1	0.239531	0.650674	0.0504083	0.0954615	0.0606852	0.0286216		257.976	0.0341348	-1	1.35895	2.08097	NaN	2.13017	NaN	1.65994		257.966	-0.0636598	1	4.58048	1.74888	0.169513	1.22707	2.56904	1.50388
258.474	-0.0788858	1	0.816622	4.18798	0.252375	5.03242	0.343765	0.116261		258.477	-0.123766	1	0.401258	2.15156	0.286295	0.653134	1.33594	0.290922		258.464	-0.0192291	1	0.174142	0.637836	0.0598037	0.0978741	0.0565434	0.0248209		258.476	0.0559639	-1	1.1361	2.05946	NaN	2.05248	NaN	1.7095		258.466	-0.0702025	1	4.53832	1.61353	0.173003	1.26495	2.52257	1.43419
258.974	-0.0576789	1	0.777753	4.07744	0.267222	5.1496	0.316906	0.119996		258.977	-0.119482	1	0.42124	2.12165	0.23522	0.731999	1.5034	0.271456		258.964	0.0072621	1	0.117457	0.620745	0.0704594	0.0965207	0.0530968	0.0202008		258.976	0.0747968	-1	0.960535	2.04318	NaN	1.98217	NaN	1.74874		258.966	-0.0760477	1	4.43119	1.51778	0.172389	1.2946	2.48145	1.36677
259.474	-0.0333686	1	0.732335	3.94582	0.280945	5.2638	0.294536	0.126233		259.477	-0.110149	1	0.447542	2.05947	0.158486	0.811143	1.67838	0.253537		259.464	0.0327025	1	0.0703704	0.598529	0.0814138	0.0902678	0.0516249	0.0146913		259.476	0.0908667	-1	0.826483	2.02394	NaN	1.93591	NaN	1.78033		259.466	-0.0803	1	4.20014	1.51862	0.161803	1.3036	2.45669	1.29855
259.974	-0.00801412	1	0.676269	3.79839	0.291702	5.3695	0.28073	0.136093		259.977	-0.0950374	1	0.478896	1.96061	0.0554754	0.884304	1.84947	0.239363		259.964	0.0557813	1	0.0337743	0.570315	0.0917058	0.0779816	0.0534073	0.00822262		259.976	0.103459	-1	0.728181	1.99357	NaN	1.93037	NaN	1.80692		259.966	-0.0833263	1	3.9547	1.50078	0.147948	1.29969	2.4259	1.23827
260.474	0.0163005	1	0.639637	3.58251	0.289635	5.43383	0.334134	0.143691		260.477	-0.0747413	1	0.46003	1.92513	0.206925	0.973793	2.05613	0.277241		260.464	0.076148	1	0.838027	0.58984	0.100065	0.092438	0.0726508	0.0276738		260.476	0.112452	-1	0.643586	1.99701	NaN	1.8768	NaN	1.76908		260.466	-0.0858032	1	3.70225	1.47858	0.132096	1.30211	2.39175	1.18217
260.974	0.0396495	1	0.510407	3.4508	0.262611	5.10211	0.469024	0.169028		260.977	-0.0497333	1	0.435079	1.80976	0.267697	0.927598	2.04512	0.309224		260.964	0.0929141	1	0.158994	0.568882	0.110926	0.0746179	0.0642854	0.00780254		260.976	0.117964	-1	0.571273	1.95998	NaN	1.87925	NaN	1.80519		260.966	-0.0875108	1	3.43681	1.50512	0.107731	1.46686	2.34649	1.13752
261.474	0.0604781	1	0.44928	3.30146	0.235039	4.74925	0.581739	0.218139		261.477	-0.024147	1	0.438008	1.72785	0.298579	0.931839	2.02837	0.349218		261.464	0.107222	1	-0.119837	0.547926	0.11477	0.0631359	0.0518002	-0.00410331		261.476	0.117559	-1	0.508347	1.9236	NaN	1.86042	NaN	1.80611		261.466	-0.0877812	1	3.24298	1.53366	0.0906136	1.62911	2.29784	1.09712
261.974	0.0785506	-1	0.440779	3.13981	0.209722	4.39437	0.680116	0.296295		261.977	0.00139903	1	0.458712	1.67413	0.31481	0.972997	2.00806	0.395521		261.964	0.11811	1	-0.076047	0.52949	0.113523	0.056833	0.0369028	-0.00942425		261.976	0.110988	-1	0.453677	1.88685	NaN	1.82531	NaN	1.7845		261.966	-0.0871429	1	3.13273	1.56453	0.0819568	1.78844	2.24525	1.06166
262.474	0.0939262	-1	0.469427	2.97118	0.18946	4.05659	0.771994	0.408769		262.477	0.0257773	1	0.487088	1.64333	0.331629	1.03755	1.98637	0.446429		262.464	0.124067	1	0.212784	0.516089	0.10911	0.0545501	0.0213006	-0.00954076		262.476	0.0993803	-1	0.406129	1.84873	NaN	1.77895	NaN	1.753		262.466	-0.0847931	1	3.06494	1.50843	0.0724692	2.00604	2.18129	1.03321
262.974	0.105808	-1	0.519747	2.80087	0.177055	3.75501	0.865208	0.560833		262.977	0.0491921	1	0.513033	1.63018	0.364275	1.11198	1.96547	0.500238		262.964	0.12407	1	0.669075	0.510242	0.103457	0.0551284	0.00670116	-0.00583333		262.976	0.0829769	-1	0.364572	1.80824	NaN	1.72636	NaN	1.72426		262.966	-0.0815175	1	2.99789	1.4671	0.0633448	2.17782	2.12568	1.00423
263.474	0.113693	-1	0.57626	2.63421	0.175309	3.50874	0.967597	0.757758		263.477	0.0705642	-1	0.526443	1.62942	0.427986	1.18277	1.94755	0.555246		263.464	0.11813	1	1.21525	0.514466	0.09849	0.0574087	-0.00518794	0.000317553		263.476	0.0626693	-1	0.327871	1.76436	NaN	1.67258	NaN	1.71093		263.466	-0.0780602	1	2.90583	1.53095	0.055963	2.15977	2.10512	0.969026
263.974	0.117288	-1	0.623491	2.47652	0.187023	3.33691	1.087	1.00482		263.977	0.0888457	-1	0.517213	1.63578	0.538003	1.2364	1.93478	0.60975		263.964	0.106446	1	1.77372	0.531276	0.0961335	0.0602321	-0.0126592	0.0075314		263.976	0.0394482	-1	0.294895	1.7161	NaN	1.62261	NaN	1.72564		263.966	-0.0735041	1	2.76378	1.48229	0.0478485	2.14962	2.07166	0.931072
264.474	0.115632	-1	0.645961	2.33311	0.214998	3.25862	1.23125	1.30728		264.477	0.103732	-1	0.47524	1.64398	0.709563	1.25934	1.92934	0.662045		264.464	0.090451	1	2.26691	0.563191	0.0983135	0.0624397	-0.0140051	0.0144277		264.476	0.0136497	-1	0.264511	1.66244	NaN	1.58148	NaN	1.78104		264.466	-0.0680096	1	2.59072	1.36385	0.0392795	2.14437	2.0302	0.891415
264.974	0.108794	-1	0.628193	2.2093	0.262036	3.29299	1.40818	1.67042		264.977	0.114876	-1	0.390421	1.64877	0.957906	1.23808	1.9334	0.710429		264.964	0.0691771	1	2.61724	0.612728	0.106955	0.0628724	-0.00751813	0.0196261		264.976	-0.0114643	1	0.235586	1.60237	NaN	1.55421	NaN	1.88979		264.966	-0.0616149	1	2.44321	1.65354	0.0290034	2.02841	1.96637	0.861221
265.474	0.0961964	-1	0.503186	2.10252	0.313708	3.16479	1.5549	2.08471		265.477	0.121709	-1	0.241115	1.63475	1.31656	0.900452	2.6964	0.774699		265.464	0.0440609	1	2.60306	0.690584	0.138136	0.0669571	-0.00908411	0.0287407		265.476	-0.0346503	1	0.381582	1.56621	NaN	1.54211	NaN	1.90861		265.466	-0.054109	1	2.30514	1.89661	0.0209014	1.924	1.88733	0.843052
265.974	0.0783574	-1	0.479338	2.00879	0.254377	3.052	1.73413	2.57385		265.977	0.124866	-1	0.265436	1.63236	1.59341	0.893854	2.64525	0.726447		265.964	0.0178925	1	2.47725	0.687263	0.137219	0.0691747	-0.00204888	0.0239783		265.976	-0.0560206	1	0.519137	1.5171	NaN	1.52362	NaN	2.02553		265.966	-0.0467674	1	2.18166	2.0649	0.016195	1.83814	1.78473	0.843563
266.474	0.0568979	-1	0.435416	1.93384	0.226988	2.89977	1.82931	3.06195		266.477	0.120929	-1	0.308007	1.64137	1.77189	0.907368	2.65822	0.688131		266.464	-0.00803764	1	2.31053	0.690077	0.138342	0.068237	0.00251271	0.0216007		266.476	-0.0748655	1	0.657672	1.48469	NaN	1.49833	NaN	2.10279		266.466	-0.0388639	1	2.13881	2.24274	0.0161995	1.76688	1.71704	0.844881
266.974	0.0333195	-1	0.376941	1.87213	0.229366	2.72815	1.87088	3.54581		266.977	0.110379	-1	0.36572	1.65661	1.86342	0.930845	2.73283	0.668821		266.964	-0.0329482	1	2.11384	0.697262	0.140623	0.0651845	0.00505637	0.0209873		266.976	-0.0908755	1	0.797536	1.46515	NaN	1.46852	NaN	2.14795		266.966	-0.029722	1	2.11776	2.42318	0.0174775	1.69958	1.65879	0.846417
267.474	0.00839138	-1	0.309433	1.81809	0.259336	2.55722	1.88928	4.02224		267.477	0.0944531	-1	0.435465	1.67294	1.87942	0.954134	2.86659	0.67759		267.464	-0.0551219	1	1.89815	0.707055	0.143176	0.0610575	0.00603785	0.0215173		267.476	-0.10452	1	0.939083	1.45464	NaN	1.4365	NaN	2.16855		267.466	-0.020432	1	2.09671	2.60361	0.0187556	1.63227	1.60054	0.847953
267.974	-0.0161486	-1	0.238416	1.76618	0.314724	2.40704	1.91495	4.48805		267.977	0.0743615	-1	0.514134	1.68517	1.83131	0.967085	3.05699	0.723506		267.964	-0.0755427	1	1.67442	0.717695	0.145119	0.0568965	0.00591288	0.0225703		267.976	-0.113469	1	1.08266	1.44934	NaN	1.40454	NaN	2.17216		267.966	-0.0107703	1	2.01965	2.57565	0.0204806	1.57954	1.54718	0.835102
268.474	-0.0392774	-1	0.169409	1.71084	0.393355	2.29769	1.97831	4.94006		268.477	0.0511029	-1	0.598619	1.68816	1.73051	0.959547	3.30156	0.815641		268.464	-0.09309	1	1.4536	0.727419	0.145568	0.0537417	0.00513719	0.0235255		268.476	-0.117534	1	1.22862	1.44541	NaN	1.37493	NaN	2.16632		268.466	-0.000998681	1	1.94009	2.54403	0.023213	1.52756	1.50466	0.814312
268.974	-0.0598716	-1	0.107934	1.64651	0.493055	2.24923	2.10982	5.37506		268.977	0.0257232	-1	0.685812	1.67673	1.58843	0.921372	3.59779	0.963065		268.964	-0.106903	1	1.24665	0.734463	0.143639	0.0526335	0.00416649	0.0237623		268.976	-0.11661	1	1.37732	1.43902	NaN	1.34995	NaN	2.1586		268.966	0.00838022	1	1.86277	2.53204	0.0278892	1.47518	1.48305	0.779603
269.474	-0.0778926	-1	0.0595132	1.56764	0.611649	2.28173	2.33991	5.78987		269.477	-0.00134919	-1	0.772603	1.64573	1.41649	0.842408	3.9432	1.17485		269.464	-0.117002	1	1.06455	0.737066	0.138447	0.0546124	0.00345654	0.0226599		269.476	-0.110598	1	1.5291	1.42635	NaN	1.3319	NaN	2.15654		269.466	0.0188704	1	1.75438	2.5744	0.025786	1.41089	1.47302	0.752466
269.974	-0.0932358	-1	0.0296667	1.46868	0.746962	2.41526	2.69901	6.1813		269.977	-0.0268869	-1	0.855885	1.58999	1.22611	0.712505	4.33529	1.46006		269.964	-0.122465	1	0.918233	0.733465	0.12911	0.0607187	0.00346305	0.0195979		269.976	-0.0993194	1	1.68432	1.40357	NaN	1.32306	NaN	2.1677		269.966	0.0294877	1	1.63677	2.6379	0.0220816	1.34653	1.46699	0.727159
270.474	-0.105662	-1	0.00981312	1.08475	0.848279	2.87284	3.62945	6.58669		270.477	-0.0501997	-1	1.06584	1.84342	1.10457	0.58825	4.90159	1.94597		270.464	-0.122976	1	0.772521	0.723304	0.116862	0.0624343	0.0073961	0.0377995		270.476	-0.0828257	1	1.82306	1.30931	NaN	1.29861	NaN	2.24582		270.466	0.0398298	1	1.5375	2.71036	0.0257541	1.31752	1.45876	0.693963
270.974	-0.11436	-1	0.0356809	1.22172	0.874009	2.90366	3.7934	6.82308		270.977	-0.0703775	-1	0.837877	1.57542	1.17578	0.618829	4.69353	2.3385		270.964	-0.118096	1	0.705776	0.703155	0.115876	0.0726945	0.00548999	0.0470881		270.976	-0.0611725	1	1.85183	1.31978	NaN	1.2952	NaN	2.19187		270.966	0.0502904	1	1.45303	2.78123	0.0290098	1.29217	1.44139	0.66619
271.474	-0.118415	-1	0.0348206	1.28264	0.896957	2.89504	3.90274	7.02597		271.477	-0.0885368	-1	0.628261	1.34269	1.21243	0.657364	4.61562	2.78238		271.464	-0.106491	1	0.651252	0.691617	0.114253	0.0765238	0.00378189	0.052802		271.476	-0.0375962	1	1.92722	1.31523	NaN	1.28574	NaN	2.17035		271.466	0.0601595	1	1.38344	2.8505	0.0318463	1.27048	1.41486	0.643871
271.974	-0.116656	-1	0.0153736	1.27851	0.914114	2.85442	3.96759	7.20049		271.977	-0.103899	-1	0.441295	1.1414	1.22101	0.70015	4.64811	3.27284		271.964	-0.0893334	1	0.608889	0.686099	0.112195	0.0753361	0.00234079	0.0554485		271.976	-0.0131153	1	2.03233	1.29939	NaN	1.27122	NaN	2.17303		271.966	0.0692976	1	1.30812	2.90832	0.0321796	1.25235	1.40627	0.607156
272.474	-0.109258	-1	-0.0145185	1.22034	0.922474	2.78928	3.99805	7.35181		272.477	-0.1164	-1	0.281284	0.967723	1.20797	0.743484	4.77129	3.80509		272.464	-0.0684784	1	0.578628	0.684011	0.1099	0.0705453	0.00123567	0.0555349		272.476	0.0112993	1	2.15024	1.27599	NaN	1.25263	NaN	2.19169		272.466	0.0779493	1	1.23792	2.9665	0.0322498	1.22302	1.39851	0.572469
272.974	-0.0965967	-1	-0.0467144	1.11915	0.91903	2.70708	4.00421	7.48505		272.977	-0.123275	-1	0.152531	0.817835	1.1798	0.783663	4.96542	4.37436		272.964	-0.0446463	1	0.560409	0.682764	0.10757	0.0635651	0.000535476	0.0535687		272.976	0.0348126	1	2.26406	1.24875	NaN	1.23098	NaN	2.2181		272.966	0.0845809	1	1.18448	3.03043	0.0326261	1.16079	1.38556	0.549497
273.474	-0.079179	-1	-0.0730724	0.985951	0.900772	2.61528	3.99618	7.60538		273.477	-0.124392	-1	0.059343	0.687908	1.14295	0.816982	5.21078	4.97584		273.464	-0.0189633	1	0.554174	0.679766	0.105403	0.0558096	0.0003092	0.0500572		273.476	0.0564103	1	2.35687	1.2214	NaN	1.20725	NaN	2.24405		273.466	0.0900754	1	1.12973	3.04249	0.0334946	1.138	1.38151	0.519973
273.974	-0.0578212	-1	-0.0854511	0.831756	0.864695	2.52134	3.98407	7.71794		273.977	-0.119716	-1	0.00602302	0.574116	1.1039	0.839739	5.48762	5.60477		273.964	0.00749552	1	0.559861	0.672429	0.1036	0.0486925	0.000625807	0.0455079		273.976	0.0750752	1	2.41176	1.19766	NaN	1.18243	NaN	2.2613		273.966	0.0953167	1	1.07541	3.02819	0.0342704	1.13627	1.38005	0.488911
274.474	-0.0333906	-1	-0.075709	0.667577	0.80779	2.43272	3.97797	7.82788		274.477	-0.110235	-1	-0.00312398	0.472634	1.06912	0.84823	5.77623	6.25636		274.464	0.0323909	1	0.577413	0.658163	0.102362	0.0436277	0.00155427	0.0404282		274.476	0.0904856	1	2.41184	1.18127	NaN	1.15753	NaN	2.26164		274.466	0.0987912	1	1.04233	3.02462	0.028399	1.1452	1.34022	0.493455
274.974	-0.00803253	-1	-0.0357047	0.504427	0.727051	2.35689	3.98799	7.94035		274.977	-0.0949316	-1	0.0362066	0.379633	1.04507	0.838751	6.05688	6.92583		274.964	0.054978	1	0.606769	0.634376	0.101887	0.0420292	0.00316356	0.0353253		274.976	0.102614	1	2.3402	1.17594	NaN	1.13353	NaN	2.23684		274.966	0.101547	1	1.00642	3.02031	0.0233127	1.14936	1.30817	0.501785
275.474	0.0163515	-1	-0.0888717	0.492194	0.657985	2.25913	4.09143	7.9177		275.477	-0.0745216	-1	0.0147211	0.354067	1.04713	0.869389	6.3567	7.5242		275.464	0.0747057	1	1.63151	0.583219	0.109157	0.0214382	0.040462	0.0158649		275.476	0.111272	1	2.22526	1.08012	NaN	1.11568	NaN	2.198		275.466	0.103626	1	0.96699	3.01508	0.0192078	1.14757	1.28585	0.514848
275.974	0.0394375	-1	0.0194188	0.420144	0.593822	2.20727	3.89999	8.11846		275.977	-0.0496678	-1	0.0514724	0.311633	1.05699	0.924174	6.73223	8.08874		275.964	0.0911025	1	0.942159	0.582049	0.129156	0.0303667	0.00282433	0.0303107		275.976	0.116641	1	1.86413	1.07588	NaN	1.04871	NaN	2.10515		275.966	0.103825	1	0.959116	2.98907	0.0138909	1.11233	1.23997	0.537584
276.474	0.0604713	-1	0.0964818	0.37992	0.550164	2.14006	3.78001	8.26637		276.477	-0.0239346	-1	0.0827812	0.290446	1.05875	0.967144	7.12783	8.57156		276.464	0.105361	1	0.64494	0.591016	0.146906	0.0368017	-0.0224893	0.0403463		276.476	0.116367	1	1.61752	1.20812	NaN	0.968346	NaN	2.04153		276.466	0.103787	1	0.956404	2.94831	0.00789916	1.06729	1.1942	0.56411
276.974	0.0789771	-1	0.150369	0.362842	0.520464	2.05918	3.71628	8.36047		276.977	0.00198286	-1	0.106999	0.283836	1.05357	1.00047	7.52007	8.99674		276.964	0.116457	1	0.660375	0.607642	0.16244	0.0412378	-0.0365109	0.0466225		276.976	0.110166	1	1.45828	1.43329	NaN	0.880634	NaN	2.00355		276.966	0.102824	1	0.950619	2.87203	0.000449823	1.0112	1.16381	0.596991
277.474	0.0947829	-1	0.189131	0.360234	0.498177	1.96633	3.69356	8.39985		277.477	0.026468	-1	0.122478	0.285135	1.04262	1.02631	7.88553	9.38837		277.464	0.12226	1	0.908988	0.629453	0.175793	0.0441694	-0.0402729	0.0497902		277.476	0.0985252	1	1.35927	1.70786	NaN	0.791628	NaN	1.9876		277.466	0.100335	1	0.958146	2.76525	-0.0063716	0.968094	1.12735	0.620816
277.974	0.106794	-1	0.22082	0.363418	0.476757	1.86319	3.69663	8.38357		277.977	0.0500134	-1	0.127568	0.287673	1.02706	1.04685	8.20077	9.77053		277.964	0.12238	1	1.3113	0.653972	0.186997	0.0460913	-0.0348072	0.0505		277.976	0.0822981	1	1.29337	1.98828	NaN	0.707377	NaN	1.99009		277.966	0.0978577	1	0.973264	2.64046	-0.0128434	0.93272	1.08737	0.639571
278.474	0.114513	-1	0.253487	0.363717	0.449659	1.75144	3.71024	8.31069		278.477	0.0714814	-1	0.120622	0.28478	1.00805	1.06424	8.44236	10.1673		278.464	0.116778	1	1.78784	0.678723	0.196087	0.0474978	-0.0211461	0.0494028		278.476	0.0622522	1	1.23345	2.23102	NaN	0.633934	NaN	2.00743		278.466	0.0942017	1	0.957478	2.53429	-0.0214759	0.894649	1.05639	0.687097
278.974	0.117653	-1	0.295185	0.352451	0.410336	1.63278	3.71918	8.18028		278.977	0.0897932	-1	0.0999911	0.269787	0.986765	1.08066	8.58687	10.6027		278.964	0.105679	1	2.25912	0.701231	0.203095	0.0488837	-0.00032182	0.0471493		278.976	0.0392539	1	1.15235	2.39253	NaN	0.577349	NaN	2.03602		278.966	0.0895146	1	0.941407	2.42837	-0.0225989	0.875575	1.02472	0.733676
279.474	0.115599	-1	0.353963	0.320944	0.352242	1.50889	3.70821	7.99141		279.477	0.104495	-1	0.0640266	0.236026	0.964359	1.09827	8.61087	11.101		279.464	0.0902307	1	2.64567	0.719019	0.208056	0.0507434	0.0266336	0.0443904		279.476	0.0138482	1	1.02296	2.42927	NaN	0.543671	NaN	2.07226		279.466	0.0857784	1	0.924884	2.32284	-0.0117666	0.886744	0.991948	0.778745
279.974	0.108263	-1	0.437874	0.260518	0.268833	1.38145	3.66211	7.74315		279.977	0.115295	-1	0.01108	0.176825	0.941999	1.11925	8.49092	11.686		279.964	0.0690989	1	2.86802	0.729612	0.211004	0.0535716	0.0586879	0.0417768		279.976	-0.010922	1	0.818126	2.29771	NaN	0.538953	NaN	2.11256		279.966	0.0810913	1	0.902957	2.24467	-0.00329871	0.88464	0.968645	0.824202
280.474	0.0953093	-1	0.481726	0.23998	0.193879	1.2954	3.62704	7.57467		280.477	0.121632	-1	0.0716703	0.201778	0.985563	1.14359	8.64867	11.82		280.464	0.0438865	1	2.68229	0.816872	0.233224	0.0775871	0.1059	0.0621716		280.476	-0.0338116	1	0.351681	2.23711	NaN	0.47831	NaN	2.20224		280.466	0.074861	1	0.881923	2.18607	0.00454211	0.877624	0.944355	0.869007
280.974	0.0769919	-1	0.506846	0.180626	0.162735	1.24691	3.51914	7.46794		280.977	0.124643	-1	0.0281816	0.171014	0.835999	1.19248	9.06161	12.0587		280.964	0.0182714	1	2.51435	0.803158	0.213555	0.0677233	0.113478	0.0481525		280.976	-0.0542463	1	0.312782	2.09421	NaN	0.460687	NaN	2.23631		280.966	0.0685084	1	0.875286	2.18692	0.0130897	0.866925	0.898011	0.909558
281.474	0.0554557	-1	0.522335	0.13917	0.140514	1.20343	3.42678	7.33837		281.477	0.120612	-1	0.0276383	0.164501	0.78699	1.25726	9.30777	12.1837		281.464	-0.00731661	1	2.34173	0.794781	0.207353	0.0599046	0.115925	0.0386382		281.476	-0.0726417	1	0.27164	1.97829	NaN	0.445681	NaN	2.26428		281.466	0.0610445	1	0.849662	2.17996	0.0173145	0.842955	0.863726	0.901276
281.974	0.0319505	-1	0.531338	0.113235	0.125696	1.16636	3.35663	7.19574		281.977	0.110016	-1	0.0612268	0.180812	0.816741	1.33055	9.41141	12.2042		281.964	-0.0318044	1	2.16631	0.791416	0.210091	0.0540783	0.114815	0.0332773		281.976	-0.0886581	1	0.230542	1.8857	NaN	0.43312	NaN	2.28739		281.966	0.0529509	1	0.808467	2.16659	0.0179938	0.8081	0.839331	0.852941
282.474	0.00733467	-1	0.536999	0.100449	0.116759	1.13708	3.3154	7.04985		282.477	0.0939616	-1	0.120133	0.218521	0.903457	1.40497	9.39677	12.1294		282.464	-0.0535944	1	1.98995	0.792733	0.217245	0.0501918	0.11172	0.0317189		282.476	-0.102426	1	0.191775	1.81277	NaN	0.422828	NaN	2.30692		282.466	0.0447894	1	0.776851	2.18471	0.0199353	0.786826	0.795929	0.817757
282.974	-0.0170681	-1	0.542461	0.0984361	0.112183	1.117	3.30975	6.91046		282.977	0.0737286	-1	0.195544	0.276201	1.02534	1.47315	9.28811	11.9686		282.964	-0.0739698	1	1.81454	0.798405	0.224288	0.0481924	0.108212	0.0336119		282.976	-0.111728	-1	0.157626	1.75583	NaN	0.414633	NaN	2.3241		282.966	0.0348869	1	0.748527	2.20804	0.0231776	0.770558	0.770754	0.773723
283.474	-0.0402461	-1	0.55087	0.104821	0.110448	1.10751	3.34638	6.78738		283.477	0.0503329	-1	0.278644	0.352427	1.1606	1.52772	9.10968	11.731		283.464	-0.0916732	1	1.64194	0.808104	0.226694	0.0480274	0.105865	0.0386052		283.476	-0.116291	-1	0.130384	1.71121	NaN	0.40836	NaN	2.34021		283.466	0.0244473	1	0.726021	2.23808	0.0291018	0.763286	0.78874	0.708139
283.974	-0.061086	-1	0.56537	0.11723	0.110032	1.11001	3.43198	6.69037		283.977	0.0248491	-1	0.360622	0.445773	1.28743	1.5613	8.88573	11.4259		283.964	-0.105782	1	1.47404	0.821502	0.219939	0.0496444	0.106252	0.0463477		283.976	-0.115965	-1	0.112335	1.67525	NaN	0.403834	NaN	2.3565		283.966	0.0148658	1	0.748862	2.36675	0.0348369	0.749632	0.807154	0.679088
284.474	-0.0790584	-1	0.589103	0.133288	0.109414	1.12588	3.57323	6.62923		284.477	-0.00231009	-1	0.432662	0.554811	1.38405	1.56652	8.6405	11.0626		284.464	-0.116402	1	1.31271	0.838272	0.199496	0.0529905	0.110944	0.0564882		284.476	-0.110715	-1	0.105766	1.64429	NaN	0.400883	NaN	2.37422		284.466	0.00402497	1	0.792832	2.5477	0.0409321	0.731948	0.829597	0.662068
284.974	-0.0942899	-1	0.625216	0.15062	0.107075	1.15653	3.77681	6.61373		284.977	-0.0278705	-1	0.485952	0.678116	1.42865	1.53601	8.39827	10.6502		284.964	-0.122209	1	1.15983	0.858086	0.160839	0.0580132	0.121516	0.0686758		284.976	-0.0999093	-1	0.112964	1.61465	NaN	0.399332	NaN	2.39464		284.966	-0.00680352	1	0.856339	2.82711	0.0509089	0.702175	0.8861	0.616649
285.474	-0.1063	-1	0.556019	0.182464	0.10485	1.12821	3.81775	6.56976		285.477	-0.0510012	-1	0.723669	0.679695	1.50248	1.58167	8.30361	9.91242		285.464	-0.122933	1	1.06209	0.920348	0.135577	0.0455284	0.129066	0.0605344		285.476	-0.0836015	-1	0.145628	1.51281	NaN	0.422314	NaN	2.37555		285.466	-0.0173023	1	0.960059	3.11038	0.0559541	0.699539	0.911085	0.57404
285.974	-0.114767	-1	0.479418	0.181376	0.122959	1.1269	4.05237	6.50605		285.977	-0.0707652	-1	0.393369	0.759957	1.23649	1.3878	8.10883	9.62561		285.964	-0.11867	1	0.982012	0.883713	0.0893389	0.0411094	0.131641	0.0593608		285.976	-0.0619451	-1	0.155244	1.5336	NaN	0.408569	NaN	2.43036		285.966	-0.0285321	1	1.10441	3.39757	0.0560162	0.724323	0.904224	0.534269
286.474	-0.118643	-1	0.44048	0.178279	0.146308	1.12624	4.2592	6.42277		286.477	-0.0884068	-1	0.178269	0.795525	1.072	1.25128	8.02162	9.39722		286.464	-0.10713	1	0.926837	0.839325	0.0621402	0.0351206	0.130669	0.056491		286.476	-0.0383662	-1	0.165226	1.55087	NaN	0.400771	NaN	2.47412		286.466	-0.0384098	1	1.21759	3.56601	0.0591615	0.754368	0.903583	0.483769
286.974	-0.116816	-1	0.430821	0.175077	0.17304	1.12567	4.43868	6.32641		286.977	-0.10322	-1	0.0562101	0.796634	0.98713	1.16259	8.01903	9.21594		286.964	-0.0897715	1	0.89537	0.791332	0.0504686	0.0279336	0.127278	0.053054		286.976	-0.0138916	-1	0.176441	1.56482	NaN	0.398018	NaN	2.5084		286.966	-0.0474505	1	1.31504	3.70879	0.0610169	0.785246	0.89187	0.445452
287.474	-0.109083	-1	0.442056	0.17367	0.201298	1.1246	4.5912	6.22345		287.477	-0.115275	-1	0.00503647	0.773518	0.959997	1.11219	8.07812	9.07047		287.464	-0.0688106	1	0.886412	0.743884	0.0508121	0.0199203	0.122598	0.0501791		287.476	0.0103889	-1	0.189756	1.57565	NaN	0.399407	NaN	2.5348		287.466	-0.0560009	1	1.38157	3.82769	0.0581269	0.816349	0.847356	0.444754
287.974	-0.0962188	-1	0.4658	0.175961	0.229223	1.12249	4.7172	6.12036		287.977	-0.121894	-1	0.00259039	0.736412	0.968727	1.09056	8.17595	8.9495		287.964	-0.0447554	1	0.898767	0.701129	0.0596588	0.0114524	0.117758	0.0489953		287.976	0.0340426	-1	0.206036	1.58356	NaN	0.404035	NaN	2.55491		287.966	-0.0631227	1	1.38714	3.90555	0.0590109	0.830973	0.837214	0.438348
288.474	-0.0787171	-1	0.493668	0.183853	0.25496	1.11875	4.81709	6.02363		288.477	-0.122959	-1	0.0267146	0.695549	0.991442	1.08816	8.28957	8.84173		288.464	-0.0188978	1	0.931238	0.667215	0.0734967	0.00290162	0.113886	0.0506318		288.476	0.0560042	-1	0.226148	1.58873	NaN	0.411001	NaN	2.57033		288.466	-0.0697964	1	1.35976	3.96249	0.0619306	0.837185	0.846109	0.429447
288.974	-0.0574383	-1	0.517277	0.199247	0.276651	1.11283	4.89128	5.93974		288.977	-0.118472	-1	0.0552519	0.661165	1.00626	1.09548	8.39604	8.73585		288.964	0.00754071	1	0.982627	0.646291	0.088814	-0.00536018	0.112113	0.0562177		288.976	0.0751934	-1	0.250959	1.59137	NaN	0.419402	NaN	2.58266		288.966	-0.0760898	1	1.34454	4.07798	0.0639253	0.86632	0.866269	0.445099
289.474	-0.0329599	-1	0.528242	0.224044	0.292438	1.10415	4.9402	5.87517		289.477	-0.109241	-1	0.0660449	0.643494	0.991315	1.10297	8.47242	8.62055		289.464	0.0329162	1	1.05174	0.642507	0.102099	-0.0129613	0.113566	0.0668822		289.476	0.0909648	-1	0.281335	1.59167	NaN	0.428334	NaN	2.59347		289.466	-0.0803927	1	1.32597	4.18441	0.0667997	0.916315	0.890423	0.450814
289.974	-0.00731758	-1	0.518176	0.260148	0.300465	1.09215	4.96427	5.8364		289.977	-0.0941234	-1	0.0369364	0.65277	0.924718	1.10111	8.49576	8.48453		289.964	0.0558149	1	1.13737	0.660011	0.109839	-0.0195299	0.119376	0.0837544		289.976	0.103462	-1	0.318143	1.58984	NaN	0.436896	NaN	2.60436		289.966	-0.0838289	1	1.30273	4.27829	0.0708941	0.995237	0.920117	0.442751
290.474	0.017435	-1	0.43769	0.215679	0.308108	1.03957	4.74848	5.93369		290.477	-0.0737304	-1	0.0720876	0.605311	0.920042	1.17057	8.20443	8.55025		290.464	0.0757674	1	1.17676	0.690173	0.124975	-0.00100642	0.104774	0.075131		290.476	0.11224	-1	0.307168	1.58047	NaN	0.447069	NaN	2.58628		290.466	-0.0869145	1	1.29512	4.3305	0.073346	1.03391	0.933926	0.437746
290.974	0.0403331	-1	0.434246	0.243275	0.439897	1.06148	5.05382	5.72833		290.977	-0.049105	-1	0.0337133	0.702223	1.09857	1.12828	8.09737	8.3787		290.964	0.0925743	1	1.11895	0.680835	0.143497	0.000399728	0.100817	0.0705743		290.976	0.117823	-1	0.366189	1.5769	NaN	0.433681	NaN	2.59046		290.966	-0.0886011	1	1.29111	4.37313	0.07542	1.06333	0.944082	0.433443
291.474	0.0612056	-1	0.443795	0.221816	0.554277	1.067	5.32457	5.62836		291.477	-0.0234933	-1	-0.00202688	0.777093	1.2806	1.12322	7.9254	8.40376		291.464	0.106844	1	1.10938	0.677855	0.156455	-0.000416044	0.101732	0.0657821		291.476	0.117363	-1	0.386745	1.57753	NaN	0.425447	NaN	2.59012		291.466	-0.0892986	1	1.28715	4.41989	0.077831	1.09422	0.952332	0.428563
291.974	0.0793754	-1	0.460867	0.167449	0.651812	1.05805	5.55043	5.61032		291.977	0.00223407	-1	-0.0300338	0.825979	1.44714	1.14993	7.71836	8.57864		291.964	0.117543	1	1.14255	0.681596	0.164974	-0.00258607	0.10611	0.0611697		291.976	0.110735	-1	0.377741	1.5802	NaN	0.421127	NaN	2.58487		291.966	-0.0883182	1	1.2838	4.50997	0.0837771	1.14058	0.940593	0.41762
292.474	0.0948894	-1	0.47999	0.0963221	0.733065	1.03656	5.72107	5.65077		292.477	0.0265093	-1	-0.0452083	0.84494	1.57919	1.20298	7.50608	8.85658		292.464	0.123336	1	1.21292	0.692421	0.170178	-0.00524269	0.112545	0.0571522		292.476	0.0983489	-1	0.348081	1.58275	NaN	0.419481	NaN	2.57435		292.466	-0.0854487	1	1.27678	4.53713	0.0883051	1.1699	0.947063	0.401421
292.974	0.106776	-1	0.495693	0.0245806	0.798602	1.00446	5.82619	5.72626		292.977	0.0498179	-1	-0.0424511	0.830034	1.65775	1.27691	7.3184	9.19079		292.964	0.123236	1	1.31499	0.710692	0.173189	-0.00751825	0.119629	0.0541448		292.976	0.0815085	-1	0.306672	1.58303	NaN	0.419266	NaN	2.55816		292.966	-0.0826126	1	1.26582	4.49634	0.0913017	1.18082	0.973198	0.379546
293.474	0.114488	-1	0.502505	-0.0316283	0.848986	0.963672	5.85548	5.81334		293.477	0.071	-1	-0.0166631	0.77732	1.66385	1.3663	7.18516	9.5345		293.464	0.117319	1	1.44322	0.736772	0.175131	-0.00854508	0.125956	0.0525626		293.476	0.0610333	-1	0.262416	1.57888	NaN	0.419244	NaN	2.53592		293.466	-0.0791257	1	1.23609	4.43735	0.0977735	1.30776	0.968142	0.367451
293.974	0.117771	-1	0.494955	-0.0561578	0.884781	0.916122	5.79861	5.88856		293.977	0.0889356	-1	0.037255	0.682857	1.57847	1.4657	7.13618	9.84095		293.964	0.10591	1	1.59211	0.771023	0.177128	-0.00745551	0.130117	0.052821		293.976	0.0378957	-1	0.22422	1.56815	NaN	0.418172	NaN	2.50726		293.966	-0.0741807	1	1.20165	4.39118	0.103377	1.41691	0.969903	0.361985
294.474	0.116116	-1	0.467572	-0.0328611	0.906553	0.863737	5.64527	5.92846		294.477	0.103631	-1	0.124402	0.542702	1.38263	1.56966	7.20131	10.0634		294.464	0.0901422	1	1.75612	0.813808	0.180304	-0.0033819	0.130705	0.055335		294.476	0.0123036	-1	0.200988	1.54868	NaN	0.414811	NaN	2.4718		294.466	-0.0688553	1	1.16158	4.39328	0.104647	1.41598	1.00755	0.372347
294.974	0.109126	-1	0.414885	0.0544087	0.914865	0.808445	5.38515	5.90961		294.977	0.114464	-1	0.249878	0.352916	1.05733	1.67273	7.41039	10.1549		294.964	0.0689551	1	1.92974	0.86549	0.185782	0.00454343	0.126314	0.0605199		294.976	-0.0126853	-1	0.201624	1.51831	NaN	0.407919	NaN	2.42914		294.966	-0.0622495	1	1.12799	4.44659	0.107311	1.42694	1.02574	0.387401
295.474	0.0965537	-1	0.393225	0.0925849	0.975771	0.737249	5.23332	5.79804		295.477	0.120916	-1	0.295001	0.210039	1.06296	1.75838	7.78737	10.2348		295.464	0.0440308	1	2.04529	0.93477	0.157454	-0.0566985	0.143377	0.0562526		295.476	-0.0359618	-1	0.162346	1.5132	NaN	0.422132	NaN	2.30825		295.466	-0.0547263	1	1.09813	4.53123	0.110779	1.44098	1.03439	0.404671
295.974	0.0778423	-1	0.310967	0.213948	1.0028	0.70661	5.04442	5.77176		295.977	0.123972	-1	0.268513	0.165285	1.16855	1.70966	7.94674	10.3199		295.964	0.0173297	1	1.96732	1.00369	0.204273	0.0786662	0.133323	0.0574662		295.976	-0.0565017	-1	0.205812	1.48504	NaN	0.432321	NaN	2.17771		295.966	-0.0472748	1	1.07005	4.68061	0.114667	1.35319	1.0844	0.409663
296.474	0.055719	-1	0.260035	0.283725	1.0343	0.686059	4.89934	5.72862		296.477	0.120054	-1	0.273878	0.134276	1.2637	1.68694	8.05914	10.3761		296.464	-0.00868998	1	1.87558	1.07594	0.241228	0.178974	0.129629	0.0557018		296.476	-0.0749165	-1	0.225007	1.46482	NaN	0.445404	NaN	2.08687		296.466	-0.038712	1	1.04228	4.75974	0.117693	1.31928	1.09754	0.412454
296.974	0.0317633	-1	0.231983	0.311116	1.06752	0.673912	4.79734	5.67379		296.977	0.109462	-1	0.303329	0.115328	1.34619	1.68448	8.12802	10.4064		296.964	-0.0332059	1	1.77304	1.1463	0.268781	0.248246	0.130449	0.0521878		296.976	-0.0906605	-1	0.231149	1.45237	NaN	0.461277	NaN	2.03083		296.966	-0.0292701	1	1.01495	4.74583	0.119579	1.35673	1.06181	0.412331
297.474	0.00711571	-1	0.218366	0.30532	1.09969	0.668489	4.73768	5.61243		297.477	0.0936651	-1	0.349098	0.106758	1.41384	1.69655	8.15681	10.4139		297.464	-0.0549392	1	1.66267	1.20957	0.287395	0.2905	0.13394	0.0481529		297.476	-0.104103	-1	0.235458	1.44751	NaN	0.479839	NaN	2.00468		297.466	-0.0197393	1	0.992831	4.80821	0.118225	1.35656	1.01984	0.418328
297.974	-0.0171544	-1	0.210737	0.275537	1.12803	0.668106	4.71965	5.54968		297.977	0.0735503	-1	0.403417	0.106883	1.46442	1.71739	8.14895	10.4016		297.964	-0.0751564	1	1.54743	1.26052	0.297533	0.309757	0.138257	0.0448256		297.976	-0.112916	-1	0.249154	1.45007	NaN	0.500988	NaN	2.00351		297.966	-0.00948006	1	0.964909	4.88036	0.116982	1.33883	0.980971	0.430327
298.474	-0.0400126	-1	0.200652	0.230967	1.1498	0.671082	4.74251	5.4907		298.477	0.0501493	-1	0.458519	0.114018	1.49573	1.74126	8.10786	10.3728		298.464	-0.0927309	1	1.43029	1.29395	0.299658	0.310037	0.141556	0.0434345		298.476	-0.116869	-1	0.283456	1.45986	NaN	0.524622	NaN	2.02243		298.466	0.000287761	1	0.911921	4.92887	0.118645	1.28663	0.958196	0.459324
298.974	-0.0603862	-1	0.179663	0.180808	1.16222	0.675735	4.80554	5.44066		298.977	0.0245939	-1	0.506636	0.126481	1.50557	1.76244	8.03698	10.3304		298.964	-0.106826	1	1.3142	1.30462	0.294233	0.295359	0.141992	0.0452082		298.976	-0.115821	-1	0.349583	1.47672	NaN	0.550638	NaN	2.05652		298.966	0.0101272	1	0.857128	5.0137	0.121151	1.21673	0.933718	0.472387
299.474	-0.0772854	-1	0.139326	0.13426	1.16252	0.680382	4.908	5.40469		299.477	-0.00265494	-1	0.54	0.142588	1.49173	1.77518	7.93974	10.2776		299.464	-0.116619	1	1.20215	1.28734	0.281721	0.269743	0.137721	0.0513752		299.476	-0.110016	-1	0.458755	1.50046	NaN	0.578936	NaN	2.10088		299.466	0.0207569	1	0.801183	5.12171	0.124195	1.13552	0.90815	0.47527
299.974	-0.0916526	-1	0.0711937	0.100524	1.14796	0.683341	5.04916	5.38796		299.977	-0.0284853	-1	0.550844	0.160656	1.45199	1.77373	7.81959	10.2175		299.964	-0.122175	1	1.09708	1.23688	0.262583	0.237208	0.126898	0.0631641		299.976	-0.0988882	1	0.62219	1.53092	NaN	0.609412	NaN	2.1506		299.966	0.0306557	1	0.731454	5.06689	0.131825	1.08717	0.924741	0.453971
300.474	-0.103373	-1	0.119681	0.0842245	1.11571	0.685255	5.23081	5.40147		300.477	-0.0518764	-1	0.374332	0.222248	1.34605	2.10794	7.84274	10.0524		300.464	-0.123027	1	1.01029	1.17623	0.251045	0.242166	0.111288	0.0699789		300.476	-0.0824822	1	0.599629	1.43189	NaN	0.642578	NaN	2.11389		300.466	0.0407446	1	0.678224	5.01223	0.138069	1.04156	0.92887	0.427365
300.974	-0.112079	-1	0.130647	0.09012	1.06302	0.682856	5.53176	5.30313		300.977	-0.0721902	-1	0.41037	0.217815	1.31738	1.77564	7.48797	10.0769		300.964	-0.119155	1	0.862693	1.17382	0.225559	0.243023	0.114797	0.0776413		300.976	-0.0611162	1	0.75508	1.37478	NaN	0.674107	NaN	2.12114		300.966	0.0505248	1	0.655398	4.96439	0.141623	0.999602	0.908758	0.392136
301.474	-0.116431	-1	0.162259	0.126484	1.00995	0.677829	5.69849	5.27773		301.477	-0.0901691	-1	0.362937	0.225475	1.27365	1.63347	7.31297	10.0994		301.464	-0.107779	1	0.738971	1.17387	0.209247	0.235486	0.118701	0.0815342		301.476	-0.0377995	1	0.848037	1.31212	NaN	0.700163	NaN	2.11312		301.466	0.059547	1	0.643845	4.87342	0.146968	0.990098	0.88307	0.349431
301.974	-0.11528	-1	0.20823	0.18283	0.957358	0.668456	5.75391	5.31054		301.977	-0.105042	-1	0.271879	0.245134	1.22172	1.64739	7.26624	10.1077		301.964	-0.0904779	1	0.637068	1.17464	0.200045	0.221597	0.122682	0.0827019		301.976	-0.0134391	1	0.892037	1.25233	NaN	0.720317	NaN	2.09214		301.966	0.0683172	1	0.636745	4.77825	0.15217	0.989081	0.855282	0.312893
302.474	-0.107772	-1	0.26227	0.248671	0.906125	0.653023	5.72093	5.38684		302.477	-0.116881	-1	0.177042	0.276695	1.16843	1.78336	7.29624	10.0895		302.464	-0.0685868	1	0.554922	1.17437	0.195887	0.2034	0.126421	0.0821889		302.476	0.0106835	1	0.900617	1.20383	NaN	0.734142	NaN	2.06052		302.466	0.0764701	1	0.633972	4.74214	0.153046	0.975012	0.82596	0.327185
302.974	-0.0951926	-1	0.318092	0.313519	0.85712	0.629813	5.62249	5.4919		302.977	-0.123278	-1	0.11827	0.320064	1.12064	2.00735	7.35148	10.0327		302.964	-0.0440685	1	0.490471	1.17132	0.19471	0.18294	0.129602	0.0810395		302.976	0.0341085	1	0.887313	1.17504	NaN	0.74121	NaN	2.02056		302.966	0.083892	1	0.6312	4.70602	0.153922	0.960942	0.796638	0.341476
303.474	-0.0779837	-1	0.369406	0.366888	0.811212	0.597111	5.48148	5.61099		303.477	-0.124086	1	0.13541	0.375144	1.08518	2.28534	7.38044	9.92483		303.464	-0.0180949	1	0.441654	1.16373	0.194448	0.16226	0.131905	0.0802981		303.476	0.0557799	1	0.86566	1.17438	NaN	0.741095	NaN	1.97457		303.466	0.090515	1	0.620678	4.62673	0.152858	0.948835	0.759793	0.375947
303.974	-0.0568685	-1	0.409924	0.39829	0.769272	0.5532	5.32082	5.72937		303.977	-0.119315	1	0.268308	0.44184	1.0689	2.58328	7.3316	9.75382		303.964	0.0082316	1	0.40641	1.14986	0.193036	0.143404	0.133014	0.0810092		303.976	0.074565	1	0.849197	1.21028	NaN	0.733369	NaN	1.92485		303.966	0.0951476	1	0.599089	4.48575	0.149021	0.93953	0.712202	0.439239
304.474	-0.0326291	-1	0.433357	0.397238	0.732172	0.496365	5.16345	5.83234		304.477	-0.109816	1	0.556807	0.520056	1.07867	2.86714	7.15346	9.50738		304.464	0.0335809	1	0.382676	1.12795	0.18841	0.128416	0.132609	0.0842171		304.476	0.0903583	1	0.85146	1.29115	NaN	0.717604	NaN	1.87372		304.466	0.0987728	1	0.578062	4.33085	0.142695	0.896107	0.70513	0.491642
304.974	-0.007192	-1	0.433417	0.353246	0.700782	0.424891	5.03226	5.90515		304.977	-0.0945329	1	1.04076	0.609698	1.12132	3.10288	6.79449	9.17326		304.964	0.0561856	1	0.36839	1.09626	0.178505	0.119339	0.130374	0.0909662		304.976	0.102883	1	0.885984	1.42541	NaN	0.693374	NaN	1.82349		304.966	0.101837	1	0.560163	4.17478	0.136301	0.853301	0.704438	0.53179
305.474	0.0174966	-1	0.505946	0.164076	0.713415	0.357399	5.06394	5.98207		305.477	-0.0741224	1	1.11294	0.91782	1.18341	2.9364	6.28586	8.76194		305.464	0.0760245	1	0.392476	1.09368	0.177587	0.132007	0.132378	0.0942254		305.476	0.111695	1	0.884834	1.42218	NaN	0.653072	NaN	1.65694		305.466	0.103608	1	0.555732	4.02895	0.13237	0.851284	0.687358	0.528847
305.974	0.0396119	-1	0.41489	0.167756	0.663353	0.287498	5.00621	5.9603		305.977	-0.0496831	1	2.14131	0.903153	1.22945	3.2467	5.95255	8.74144		305.964	0.0922885	1	0.35133	1.08641	0.161689	0.1262	0.12303	0.0826808		305.976	0.117443	1	1.19305	1.84553	NaN	0.641535	NaN	1.75401		305.966	0.104276	1	0.563245	3.91729	0.130621	0.838728	0.671332	0.501059
306.474	0.0597375	-1	0.375511	0.158527	0.626104	0.242406	4.96933	5.91616		306.477	-0.0238909	1	2.9034	0.972241	1.25401	3.47442	5.7155	8.59799		306.464	0.106333	1	0.336671	1.07731	0.157125	0.117791	0.116547	0.075326		306.476	0.117274	1	1.4	2.19599	NaN	0.620888	NaN	1.78935		306.466	0.104327	1	0.579572	3.83083	0.130481	0.818396	0.656081	0.454938
306.974	0.0774999	-1	0.375668	0.140439	0.599858	0.218518	4.94682	5.85255		306.977	0.00217324	1	3.42962	1.11102	1.25734	3.63628	5.5534	8.36387		306.964	0.117102	1	0.345138	1.06649	0.16115	0.107481	0.112683	0.0716513		306.976	0.110801	1	1.5217	2.48164	NaN	0.593651	NaN	1.77507		306.966	0.103088	1	0.602934	3.76502	0.135458	0.825086	0.641924	0.408194
307.474	0.0927946	-1	0.403223	0.117543	0.582809	0.212232	4.93221	5.77239		307.477	0.0267693	1	3.75042	1.30544	1.23971	3.74902	5.44495	8.07137		307.464	0.123349	1	0.373368	1.05408	0.171021	0.0959712	0.11119	0.0711467		307.476	0.0988396	1	1.57417	2.71052	NaN	0.562346	NaN	1.72329		307.466	0.101651	1	0.621803	3.7273	0.13817	0.825575	0.626718	0.384925
307.974	0.1047	-1	0.446036	0.0938905	0.573149	0.219946	4.91906	5.67861		307.977	0.0502484	1	3.89621	1.54144	1.20136	3.82938	5.36883	7.75278		307.964	0.123428	1	0.417997	1.0402	0.183993	0.0839651	0.111822	0.0733027		307.976	0.0822064	1	1.57344	2.89073	NaN	0.529494	NaN	1.64613		307.966	0.0996197	1	0.63248	3.73731	0.136666	0.813823	0.60963	0.402492
308.474	0.112603	-1	0.491969	0.073532	0.569069	0.238056	4.90088	5.57412		308.477	0.0714336	1	3.89743	1.80495	1.14257	3.89409	5.30375	7.44038		308.464	0.117477	1	0.475663	1.02496	0.197323	0.0721641	0.11433	0.0776092		308.476	0.0617259	1	1.53554	3.03031	NaN	0.497615	NaN	1.55569		308.466	0.096344	1	0.639517	3.77461	0.134303	0.816168	0.601919	0.428257
308.974	0.116107	-1	0.528882	0.0605184	0.568762	0.26296	4.87122	5.46184		308.977	0.0892471	1	3.78451	2.08192	1.0636	3.95988	5.22838	7.16647		308.964	0.105773	1	0.543003	1.00848	0.208266	0.0612703	0.118468	0.0835565		308.976	0.0383947	1	1.4765	3.13734	NaN	0.469231	NaN	1.4641		308.966	0.0922447	1	0.643897	3.82018	0.131345	0.82144	0.597226	0.464806
309.474	0.11492	-1	0.544635	0.0589006	0.57042	0.291054	4.82361	5.34468		309.477	0.103841	1	3.58787	2.35828	0.96469	4.04348	5.12142	6.96334		309.464	0.0893446	1	0.616654	0.990895	0.214079	0.0519857	0.123988	0.0906348		309.476	0.0125868	1	1.41233	3.21988	NaN	0.446864	NaN	1.38347		309.466	0.0865896	1	0.639899	3.86419	0.126588	0.818484	0.592964	0.54676
309.974	0.108421	-1	0.52709	0.0727293	0.572236	0.318737	4.75159	5.22556		309.977	0.114409	1	3.33794	2.61999	0.846117	4.16164	4.96157	6.86327		309.964	0.0678924	1	0.693252	0.97231	0.212017	0.0450124	0.130644	0.0983343		309.976	-0.0125472	1	1.35907	3.28601	NaN	0.433033	NaN	1.32591		309.966	0.0800922	1	0.650742	3.88435	0.13254	0.786988	0.595548	0.609523
310.474	0.0960305	-1	0.521436	0.0657301	0.600835	0.282815	4.79298	5.09989		310.477	0.120756	1	3.12463	2.76371	0.849372	4.1238	4.83288	6.57598		310.464	0.0429461	1	0.617662	0.969131	0.213854	0.0164595	0.128246	0.0828017		310.476	-0.0356328	1	1.24501	3.36511	NaN	0.419009	NaN	1.3219		310.466	0.0742087	1	0.674257	3.88413	0.147637	0.731122	0.603979	0.655898
310.974	0.0778851	-1	0.499007	0.0773954	0.573376	0.406458	4.73105	5.0071		310.977	0.123665	1	3.02454	3.06755	0.721395	4.35044	4.54268	6.25555		310.964	0.0164509	1	0.894756	0.926527	0.203664	0.0298577	0.140149	0.0865278		310.976	-0.0560852	1	1.05113	3.22183	NaN	0.403387	NaN	1.30939		310.966	0.0675141	1	0.686727	3.92241	0.172844	0.647792	0.607162	0.684551
311.474	0.0559684	-1	0.500904	0.0839596	0.602689	0.48085	4.66038	4.94167		311.477	0.119855	1	2.902	3.25095	0.660098	4.4793	4.36524	5.95259		311.464	-0.00906013	1	1.11625	0.913876	0.19895	0.0371234	0.14504	0.0911046		311.476	-0.0744063	1	0.854873	3.03489	NaN	0.381208	NaN	1.34772		311.466	0.059965	1	0.688842	4.0038	0.204411	0.562212	0.602544	0.703593
311.974	0.0318071	-1	0.521345	0.0864326	0.671871	0.515655	4.59423	4.89639		311.977	0.109602	1	2.75613	3.3211	0.651596	4.51924	4.27918	5.68584		311.964	-0.0331998	1	1.28352	0.924424	0.198596	0.0394386	0.144865	0.095916		311.976	-0.0900947	1	0.665281	2.82341	NaN	0.354494	NaN	1.42397		311.966	0.0517788	1	0.667593	4.18405	0.249622	0.476865	0.579678	0.702533
312.474	0.00693878	-1	0.55455	0.0858247	0.764019	0.520538	4.54586	4.86406		312.477	0.0943734	1	2.58605	3.28517	0.682004	4.47914	4.2631	5.47406		312.464	-0.055043	1	1.39795	0.951415	0.201487	0.0379854	0.141566	0.100345		312.476	-0.103481	1	0.491388	2.60654	NaN	0.325268	NaN	1.52524		312.466	0.0430678	1	0.648973	4.35482	0.306466	0.423233	0.573411	0.674719
312.974	-0.0175257	-1	0.594739	0.0831458	0.862226	0.505162	4.52855	4.83749		312.977	0.0746424	1	2.39085	3.15035	0.737439	4.36787	4.2956	5.336		312.964	-0.0752057	1	1.46091	0.988093	0.206505	0.033946	0.137087	0.103777		312.976	-0.112328	-1	0.342233	2.40341	NaN	0.295552	NaN	1.63859		312.966	0.034205	1	0.631263	4.51473	0.37006	0.387123	0.575292	0.636858
313.474	-0.0405266	-1	0.636131	0.0794062	0.949591	0.479192	4.55556	4.80946		313.477	0.0514565	1	2.16965	2.92381	0.804016	4.19431	4.35528	5.29039		313.464	-0.0926886	1	1.47378	1.0277	0.212535	0.0285024	0.133372	0.105594		313.476	-0.116384	-1	0.226853	2.23316	NaN	0.267369	NaN	1.75111		313.466	0.0248362	1	0.609828	4.59728	0.449842	0.384604	0.582512	0.627417
313.974	-0.0609274	-1	0.672945	0.0756158	1.00921	0.452292	4.64015	4.77279		313.977	0.0258969	1	1.92156	2.61273	0.867851	3.96734	4.42074	5.356		313.964	-0.106675	1	1.43794	1.06349	0.218461	0.0228367	0.132365	0.10518		313.976	-0.115531	-1	0.154284	2.11494	NaN	0.242741	NaN	1.84988		313.966	0.0143843	1	0.6019	4.62454	0.525008	0.37798	0.584356	0.623197
314.474	-0.0782808	-1	0.699402	0.0727848	1.02418	0.434127	4.79559	4.72026		314.477	-0.00114067	1	1.64568	2.22429	0.915059	3.69581	4.47059	5.55156		314.464	-0.116616	1	1.35477	1.0887	0.223167	0.0181312	0.136008	0.101919		314.476	-0.110024	-1	0.133566	2.06786	NaN	0.223691	NaN	1.92199		314.466	0.00355578	1	0.609277	4.58915	0.594944	0.366706	0.580108	0.624892
314.974	-0.0928769	-1	0.70972	0.0719233	0.977588	0.43436	5.03514	4.64469		314.977	-0.0266541	1	1.34113	1.76568	0.931757	3.38862	4.48342	5.89583		314.964	-0.122195	1	1.22563	1.09658	0.225536	0.0155677	0.146247	0.0951942		314.976	-0.0989968	-1	0.173734	2.11108	NaN	0.212241	NaN	1.95451		314.966	-0.00750866	1	0.596654	4.60349	0.67198	0.333229	0.55445	0.626629
315.474	-0.104562	-1	0.716528	0.0497783	0.97021	0.441542	5.10888	4.60324		315.477	-0.0495366	1	1.07623	1.50683	0.890785	3.21124	4.90298	5.85727		315.464	-0.122779	1	1.06638	1.06303	0.229355	0.00982165	0.155008	0.0686273		315.476	-0.0825541	-1	0.0573863	2.04935	NaN	0.197435	NaN	2.04466		315.466	-0.018405	1	0.589821	4.66679	0.750373	0.295826	0.530054	0.625671
315.974	-0.113271	-1	0.657184	0.0524316	0.886173	0.471738	5.01129	4.54678		315.977	-0.0693651	1	0.886344	1.281	0.865322	3.10182	4.91494	6.20256		315.964	-0.118429	1	0.954128	1.02494	0.221907	0.00925712	0.161624	0.068154		315.976	-0.0613068	-1	0.131737	2.0406	NaN	0.169072	NaN	2.08853		315.966	-0.0288446	1	0.608538	4.84802	0.82947	0.257141	0.518876	0.616975
[truncated: 806 more rows]

## Sheet: Fig 2HI_const temp
animal #1									animal #2									animal #3 (shown in H)									animal #4									animal #5										animal #6
[truncated: 1,438 more rows]
[truncated: 4 more columns]

[truncated: 1 more sheets: Fig 2-S1]
