# Supplementary material for: Corollary discharge promotes a sustained motor state in a neural circuit for navigation
Source: eLife. 2021 Apr 21;10:e68848. doi: 10.7554/eLife.68848 (PMC8139836; doi:10.7554/eLife.68848)
Supplement: Figure 3—source data 1. [file elife-68848-fig3-data1.xlsx]

## Sheet: Fig 3A
Time relative to onset of a forward run (s)
-20	-19.5	-19	-18.5	-18	-17.5	-17	-16.5	-16	-15.5	-15	-14.5	-14	-13.5	-13	-12.5	-12	-11.5	-11	-10.5	-10	-9.5	-9	-8.5	-8	-7.5	-7	-6.5	-6	-5.5	-5	-4.5	-4	-3.5	-3	-2.5	-2	-1.5	-1	-0.5	0	0.5	1	1.5	2	2.5	3	3.5	4	4.5
Calcium activity in AIY (dR/R0)
0.341194	0.4203	0.461572	0.483251	0.50493	0.518792	0.520977	0.505545	0.454116	0.426923	0.472904	0.533491	0.670311	0.807563	0.949624	1.0915	1.15818	1.22485	1.14156	1.04529	0.91611	0.780845	0.65216	0.525414	0.437728	0.368577	0.32709	0.30391	0.284113	0.26752	0.254641	0.246682	0.23737	0.225451	0.224855	0.25622	0.300787	0.404132	0.513883	0.675777	0.8361	0.950698	1.06529	1.09341	1.11747	1.07995	1.03426	0.973093	0.908311	0.852681
0.235729	0.232208	0.242855	0.255391	0.268788	0.279592	0.288642	0.293165	0.308413	0.331879	0.361847	0.394184	0.433773	0.474345	0.516142	0.541284	0.561193	0.601909	0.628534	0.625802	0.61901	0.609704	0.58798	0.571512	0.580415	0.587043	0.591364	0.58603	0.576395	0.547562	0.533824	0.545187	0.550077	0.551759	0.565811	0.580216	0.594208	0.621715	0.660387	0.727911	0.802113	0.884158	0.96548	1.04583	1.08773	1.11459	1.13743	1.15732	1.17051	1.18415
0.237414	0.231608	0.225363	0.212476	0.196662	0.206001	0.221132	0.250305	0.309277	0.390431	0.527586	0.668113	0.780815	0.851533	0.87142	0.815157	0.732323	0.63553	0.550173	0.487885	0.426459	0.365552	0.33588	0.310932	0.293169	0.278946	0.268214	0.261974	0.256485	0.246977	0.23857	0.231941	0.216553	0.196961	0.186991	0.18037	0.182313	0.189758	0.201618	0.224047	0.25104	0.294304	0.350234	0.422689	0.500042	0.579303	0.661933	0.753396	0.864251	0.974274
0.0131691	0.0126979	0.0150051	0.0149089	0.0131351	0.0140368	0.0150877	0.0151534	0.0139766	0.0113873	0.0083098	0.00516528	0.00353056	0.00304402	0.00471739	0.00866415	0.0138891	0.0173758	0.0251844	0.0482057	0.0981022	0.172886	0.238071	0.297046	0.322108	0.324523	0.292726	0.263292	0.234914	0.222061	0.211679	0.207092	0.206365	0.208544	0.232774	0.26444	0.317397	0.376754	0.443952	0.52255	0.603827	0.650534	0.694983	0.734815	0.780658	0.830159	0.882658	0.935072	0.986092	1.00304
0.24379	0.261267	0.275191	0.281193	0.270031	0.264111	0.261559	0.251982	0.244319	0.247724	0.244455	0.23418	0.220163	0.205363	0.193911	0.18324	0.173916	0.172447	0.175024	0.171839	0.16899	0.16804	0.165184	0.160698	0.167037	0.175631	0.184737	0.19659	0.212262	0.225698	0.238219	0.249112	0.259207	0.267418	0.267307	0.261421	0.261934	0.26252	0.259502	0.262761	0.273115	0.336442	0.419733	0.561948	0.71074	0.871831	0.99417	1.09486	1.09384	1.07324
0.246349	0.222135	0.211417	0.202831	0.184021	0.162422	0.14924	0.139469	0.125494	0.109127	0.0973666	0.0891504	0.0900336	0.100518	0.136127	0.207684	0.312114	0.480696	0.632225	0.733403	0.819255	0.834809	0.850363	0.862431	0.746949	0.631466	0.507843	0.383816	0.267098	0.151408	0.0798874	0.0191066	-0.0107963	-0.0293017	-0.0314572	-0.0250465	0.0107145	0.0677291	0.147576	0.249696	0.367453	0.506263	0.631422	0.731674	0.818135	0.868779	0.914029	0.937651	0.958936	0.96427
0.277973	0.339343	0.403635	0.454267	0.458536	0.458981	0.434189	0.409148	0.377659	0.34617	0.314975	0.288129	0.261283	0.237974	0.214754	0.198822	0.183873	0.169118	0.154445	0.147538	0.145408	0.145959	0.149014	0.154569	0.163852	0.174042	0.186235	0.197693	0.206676	0.216467	0.231344	0.245996	0.256442	0.266889	0.279288	0.3036	0.327643	0.347379	0.367115	0.393938	0.420932	0.485831	0.555225	0.666292	0.78711	0.898476	1.00621	1.05259	1.06422	1.03096
0.385318	0.341838	0.298177	0.25285	0.207561	0.181574	0.155586	0.140352	0.126085	0.119315	0.114065	0.115035	0.118147	0.122353	0.127171	0.132729	0.138898	0.139428	0.133208	0.12638	0.118512	0.108186	0.0916467	0.0768465	0.0692272	0.0617941	0.0560557	0.0503173	0.0504417	0.0505943	0.0454293	0.0397423	0.0405305	0.0427151	0.0402086	0.0360608	0.0332198	0.031069	0.027055	0.0216388	0.0194215	0.0206335	0.0259609	0.0380543	0.0513398	0.067622	0.0863516	0.114908	0.143182	0.169238
0.0969789	0.137414	0.17573	0.214326	0.264626	0.314927	0.330416	0.343974	0.343591	0.341187	0.32936	0.315159	0.301707	0.288544	0.292376	0.3054	0.3156	0.323726	0.32247	0.311479	0.290582	0.255824	0.227135	0.21022	0.211136	0.262122	0.309901	0.344025	0.373045	0.362558	0.351029	0.313417	0.275804	0.261011	0.247011	0.31889	0.401146	0.501333	0.605462	0.690428	0.768871	0.818328	0.853248	0.875908	0.890159	0.916674	0.95461	0.971513	0.961973	0.936841
0.754475	0.606782	0.512088	0.417808	0.376147	0.334486	0.31227	0.291438	0.293979	0.300408	0.313384	0.328196	0.35486	0.38638	0.400686	0.405021	0.414103	0.426903	0.433248	0.432804	0.438255	0.452078	0.462582	0.466665	0.473644	0.488824	0.502824	0.511685	0.521166	0.535618	0.549372	0.543554	0.537736	0.54418	0.551132	0.525518	0.495812	0.5096	0.533195	0.614321	0.716489	0.857297	1.01835	1.14361	1.24313	1.28439	1.26822	1.22543	1.14703	1.06943
0.140068	0.129226	0.116561	0.10312	0.084935	0.0672524	0.0615107	0.055769	0.0604559	0.0657288	0.0813755	0.0986218	0.125871	0.155908	0.225773	0.313067	0.430845	0.568311	0.696009	0.814685	0.905706	0.958	0.981986	0.945762	0.897642	0.809146	0.719096	0.618447	0.51869	0.443226	0.367762	0.336563	0.308533	0.280503	0.245813	0.206041	0.170037	0.138362	0.110817	0.0900455	0.0733597	0.0664285	0.061344	0.0633427	0.0657372	0.0709529	0.0762757	0.0851581	0.0940405	0.101914
0.483407	0.465167	0.462246	0.459394	0.452423	0.447967	0.445907	0.433281	0.418843	0.411258	0.401284	0.387592	0.373995	0.360442	0.36352	0.365177	0.361949	0.365392	0.374007	0.360982	0.346134	0.341586	0.330994	0.312787	0.305392	0.302104	0.306257	0.313877	0.328816	0.340275	0.349551	0.349024	0.34892	0.354479	0.356518	0.354947	0.352207	0.349372	0.349102	0.358872	0.385542	0.416089	0.448583	0.490121	0.524889	0.538382	0.550265	0.560801	0.560087	0.558432
0.724953	0.721757	0.755243	0.801968	0.850362	0.899707	0.93157	0.94906	0.943124	0.909755	0.872034	0.827414	0.786076	0.752555	0.721656	0.701615	0.679968	0.645611	0.611735	0.600952	0.590168	0.583886	0.577869	0.575356	0.573358	0.571359	0.581209	0.598199	0.623766	0.656712	0.713174	0.797044	0.857537	0.879199	0.89621	0.902553	0.901248	0.87338	0.852369	0.872311	0.890461	0.884563	0.878666	0.899824	0.921168	0.933635	0.945084	0.96856	0.994583	1.0132
0.0342502	0.0299628	0.0262911	0.0226465	0.0193164	0.0168188	0.0165996	0.0181558	0.0192829	0.0203918	0.0218587	0.0226307	0.0224684	0.0279645	0.0357225	0.0445473	0.054102	0.0654352	0.0714573	0.0736204	0.0739718	0.0735569	0.0704855	0.0650936	0.0567918	0.0503464	0.044607	0.0401266	0.0371024	0.0373479	0.0391632	0.0420415	0.045817	0.0512788	0.0642624	0.0725458	0.0753288	0.0997063	0.135513	0.280088	0.439244	0.628647	0.791841	0.938518	0.980923	1.00217	0.981652	0.94912	0.903459	0.814151
0.531315	0.543367	0.581911	0.62834	0.678336	0.775388	0.87172	0.963808	1.02812	1.07126	1.06354	1.04311	0.998038	0.958557	0.92601	0.86971	0.80448	0.722335	0.642165	0.566084	0.507416	0.459477	0.426492	0.398433	0.383881	0.367764	0.350066	0.337079	0.325196	0.311766	0.305181	0.309911	0.318968	0.330158	0.32659	0.321053	0.311441	0.305026	0.301235	0.33917	0.391351	0.484628	0.601209	0.748916	0.873642	0.988727	1.05145	1.09887	1.11182	1.11481
0.99059	0.860307	0.739056	0.619105	0.501156	0.427077	0.373464	0.339136	0.318968	0.337772	0.346488	0.346829	0.381939	0.421941	0.447613	0.487032	0.546164	0.584801	0.614613	0.615677	0.60191	0.550091	0.477647	0.389227	0.309014	0.235133	0.191412	0.149757	0.110861	0.0898279	0.0757981	0.0437613	0.0215081	0.0229265	0.035525	0.0561998	0.0504484	0.0494894	0.0957269	0.155009	0.230555	0.343684	0.469932	0.570896	0.660731	0.725748	0.769421	0.798728	0.839607	0.887076
0.0418159	0.0370956	0.0287517	0.0204514	0.0126765	0.0121093	0.0176658	0.0273045	0.0383661	0.0538045	0.0655879	0.0720047	0.0695506	0.063172	0.0537352	0.044396	0.035478	0.0297354	0.0265103	0.0264828	0.0275007	0.0315093	0.0374046	0.0458814	0.0526417	0.0587023	0.0624933	0.0655761	0.0669054	0.0642215	0.0585702	0.0578707	0.0569603	0.0504553	0.0469147	0.0471569	0.0448496	0.0418488	0.0552411	0.0746014	0.107635	0.145317	0.186204	0.238275	0.290348	0.334913	0.391672	0.462951	0.555994	0.656974
0.773424	0.74164	0.720599	0.698846	0.676111	0.645564	0.600328	0.557112	0.519372	0.483955	0.45835	0.432298	0.402809	0.374032	0.361276	0.34852	0.328966	0.309211	0.324174	0.343375	0.348094	0.349607	0.366407	0.388446	0.387896	0.376161	0.353396	0.323166	0.297102	0.274843	0.28181	0.324412	0.389432	0.491246	0.591285	0.687305	0.773961	0.829996	0.879676	0.894918	0.904281	0.84952	0.79453	0.711084	0.627638	0.601702	0.580095	0.558487	0.596368	0.650331
0.335953	0.305017	0.284721	0.26802	0.267577	0.266889	0.263932	0.260974	0.258969	0.256979	0.262011	0.267934	0.266405	0.263044	0.264677	0.268384	0.26599	0.259866	0.261507	0.270361	0.276581	0.279313	0.276734	0.26405	0.251308	0.238401	0.223704	0.200523	0.178562	0.168902	0.159221	0.144646	0.130072	0.121847	0.114189	0.10244	0.0898668	0.073442	0.0555956	0.0344576	0.011439	-0.00478595	-0.0155372	-0.0234599	-0.028193	-0.0329261	-0.02403	-0.0132082	0.00157511	0.0174013
0.0884283	0.056473	0.0324143	0.026917	0.0246663	0.0242863	0.0218537	0.0168171	0.00995733	0.00248879	-0.0010148	-0.0026432	-4.2516e-06	0.00365035	0.00800077	0.0221636	0.0442303	0.0985075	0.155506	0.215725	0.251535	0.277233	0.25202	0.220216	0.174555	0.134987	0.0993048	0.0755126	0.0551957	0.0441696	0.0399867	0.0433662	0.0449989	0.0457282	0.0397837	0.0337147	0.0274039	0.0217852	0.016577	0.0251109	0.0399623	0.0745377	0.130886	0.209701	0.325671	0.450086	0.547087	0.622896	0.660475	0.632986
0.0421314	0.0501169	0.0550203	0.0592976	0.0625814	0.0664291	0.0705485	0.0699806	0.0684378	0.0645254	0.0618511	0.0602348	0.0606147	0.0617811	0.0657802	0.0682283	0.0683858	0.0649324	0.0598709	0.0539962	0.0478924	0.0412089	0.042835	0.0510876	0.0593532	0.0681408	0.0803251	0.0874322	0.0875518	0.0832819	0.0772103	0.0647114	0.0528831	0.0427809	0.0351339	0.029313	0.0286034	0.0288114	0.0295678	0.0839683	0.207215	0.419621	0.664776	0.849013	0.981839	0.996078	0.923999	0.792082	0.678888	0.572425
NaN	NaN	NaN	NaN	NaN	NaN	NaN	NaN	NaN	NaN	NaN	NaN	NaN	NaN	NaN	0.402403	0.39384	0.382493	0.369178	0.350346	0.331798	0.318273	0.311054	0.311087	0.313537	0.317161	0.328256	0.344927	0.372223	0.402303	0.433968	0.467084	0.497374	0.517457	0.529668	0.534505	0.536235	0.536591	0.531315	0.543367	0.581911	0.62834	0.678336	0.775388	0.87172	0.963808	1.02812	1.07126	1.06354	1.04311
0.135247	0.122266	0.106438	0.0829226	0.0602123	0.0392508	0.0248958	0.0148827	0.00943488	0.00525578	0.00433288	0.00318995	0.0017968	0.00246553	0.00382916	0.00583377	0.00750924	0.00852358	0.0134037	0.0206477	0.0250609	0.0290525	0.0324844	0.035012	0.0365796	0.0362919	0.0356763	0.0383722	0.0411458	0.0440638	0.0476725	0.0516738	0.0521992	0.0539054	0.0609723	0.0669745	0.0719211	0.0739806	0.0771488	0.102337	0.132756	0.172214	0.229834	0.297029	0.402658	0.50048	0.564588	0.604883	0.623131	0.622833
0.605084	0.6091	0.694529	0.78581	0.88649	0.941114	0.973248	0.940664	0.90107	0.848405	0.793083	0.735465	0.672932	0.608766	0.539972	0.477537	0.424608	0.378671	0.33589	0.307701	0.276055	0.233893	0.201521	0.177044	0.153626	0.131339	0.1153	0.100548	0.0875898	0.0781074	0.0700716	0.0682631	0.0684159	0.0734602	0.0739552	0.0710267	0.0724841	0.074081	0.0723001	0.0743051	0.0812258	0.0867505	0.0917664	0.0989843	0.108763	0.12453	0.136184	0.144951	0.151127	0.158771
0.400617	0.490172	0.613595	0.741231	0.869232	0.973824	1.06072	1.11258	1.1226	1.10789	1.06479	1.01371	0.942292	0.86944	0.795196	0.719021	0.643514	0.579079	0.521103	0.473363	0.443028	0.420886	0.430572	0.453519	0.510617	0.579403	0.657408	0.749975	0.833918	0.852143	0.862404	0.862452	0.812826	0.745734	0.710844	0.674978	0.63701	0.623358	0.625235	0.656981	0.693273	0.735086	0.785723	0.845569	0.883506	0.915021	0.942521	0.952591	0.932782	0.901986
0.136676	0.149068	0.134395	0.119723	0.119606	0.120779	0.120257	0.106584	0.0937395	0.11433	0.134921	0.182638	0.23239	0.280299	0.327832	0.376126	0.424691	0.474331	0.524547	0.559074	0.581631	0.581629	0.557558	0.513119	0.437794	0.369628	0.317147	0.270142	0.243367	0.216592	0.192408	0.179201	0.166313	0.156462	0.146611	0.139265	0.131936	0.127046	0.122436	0.124058	0.127207	0.135645	0.146254	0.211141	0.30865	0.427711	0.567102	0.709411	0.855743	0.95914
0.234639	0.226832	0.224919	0.224174	0.224057	0.224063	0.224159	0.237586	0.264965	0.295152	0.329378	0.358403	0.377065	0.390601	0.389564	0.396613	0.440104	0.487513	0.567412	0.645697	0.671777	0.697856	0.635432	0.568916	0.482568	0.393465	0.338547	0.2919	0.285527	0.294111	0.309325	0.32799	0.349693	0.373548	0.400304	0.429972	0.475241	0.541583	0.626387	0.745629	0.851665	0.922566	0.984518	1.01085	1.02986	0.997604	0.964973	0.925511	0.88605	0.829894
0.0659032	0.0504351	0.0405672	0.0306262	0.0206225	0.0162832	0.0134427	0.0129716	0.0132088	0.0144985	0.0190985	0.0251826	0.0261469	0.0267888	0.0268523	0.0261937	0.024956	0.0222637	0.019987	0.0222544	0.0210825	0.0151494	0.0142425	0.0154129	0.013332	0.0124562	0.0146562	0.0137541	0.0105313	0.0101999	0.0104239	0.0111384	0.0138006	0.018977	0.0222092	0.0247243	0.028906	0.0336648	0.0397638	0.0583724	0.0857044	0.142446	0.205977	0.283009	0.353651	0.416595	0.453638	0.481297	0.497032	0.507808
0.0232608	0.017389	0.0123712	0.0097178	0.00585688	-0.000525431	0.0139489	0.041647	0.0977572	0.156932	0.215728	0.257367	0.280151	0.28222	0.278697	0.289279	0.299539	0.309176	0.314904	0.318327	0.29598	0.26898	0.232969	0.19477	0.154325	0.121192	0.0908839	0.0710156	0.054005	0.0421178	0.0367632	0.034985	0.0306907	0.0253608	0.0170303	0.0105988	0.00598667	0.00845958	0.0142159	0.0357047	0.0577352	0.0806677	0.111136	0.145429	0.171577	0.196602	0.219387	0.24045	0.259974	0.272336
0.0797542	0.0918421	0.106146	0.121465	0.138818	0.159611	0.191336	0.230755	0.315542	0.398729	0.457379	0.516029	0.525236	0.533279	0.541321	0.478681	0.406475	0.344327	0.285046	0.240732	0.203244	0.17986	0.166263	0.154643	0.144995	0.135219	0.125263	0.119563	0.123984	0.127139	0.124895	0.124159	0.136676	0.149068	0.134395	0.119723	0.119606	0.120779	0.120257	0.106584	0.0937395	0.11433	0.134921	0.182638	0.23239	0.280299	0.327832	0.376126	0.424691	0.474331
0.256992	0.245886	0.23625	0.240421	0.249698	0.246408	0.236541	0.22801	0.220436	0.208969	0.193517	0.189524	0.201472	0.214467	0.229445	0.241161	0.243853	0.245668	0.243589	0.242161	0.245906	0.25083	0.286128	0.321425	0.332895	0.34331	0.350653	0.35759	0.345039	0.327706	0.322072	0.320735	0.327052	0.337611	0.35332	0.3729	0.418473	0.493241	0.590873	0.724384	0.846439	0.943788	1.02546	1.05608	1.07812	1.05318	1.02716	0.988075	0.948987	0.875744
0.492344	0.508562	0.523882	0.509894	0.492541	0.51688	0.550088	0.572703	0.591752	0.602275	0.608461	0.614647	0.598762	0.570802	0.569784	0.589593	0.651228	0.758501	0.872466	0.996387	1.09314	1.13321	1.13819	1.02945	0.913443	0.759832	0.61109	0.515724	0.420774	0.378818	0.336861	0.314488	0.293507	0.296067	0.302541	0.315609	0.330526	0.35738	0.389123	0.403531	0.407897	0.417043	0.429934	0.436324	0.435877	0.441366	0.455288	0.465866	0.469978	0.477007
0.0341755	0.0281312	0.0246758	0.0209619	0.0170453	0.0158539	0.0180053	0.0381633	0.0644747	0.0991074	0.16043	0.232505	0.320187	0.401655	0.467877	0.508291	0.529843	0.507714	0.476741	0.434351	0.390597	0.34512	0.29849	0.251575	0.212131	0.175111	0.143572	0.11814	0.0968667	0.0783287	0.0604523	0.0440241	0.0314023	0.0232608	0.017389	0.0123712	0.0097178	0.00585688	-0.000525431	0.0139489	0.041647	0.0977572	0.156932	0.215728	0.257367	0.280151	0.28222	0.278697	0.289279	0.299539
0.0933878	0.0791834	0.0690537	0.0603634	0.0540849	0.0559677	0.0620191	0.0838477	0.112907	0.162435	0.212706	0.263645	0.303914	0.340371	0.364744	0.381276	0.385591	0.376314	0.360612	0.319932	0.279205	0.240819	0.206657	0.176044	0.148972	0.123198	0.101696	0.0806583	0.0602945	0.048809	0.0411987	0.0341755	0.0281312	0.0246758	0.0209619	0.0170453	0.0158539	0.0180053	0.0381633	0.0644747	0.0991074	0.16043	0.232505	0.320187	0.401655	0.467877	0.508291	0.529843	0.507714	0.476741
0.676716	0.743627	0.802963	0.857245	0.894334	0.914667	0.936774	0.961249	0.978867	0.98408	0.978445	0.944638	0.908604	0.862429	0.813253	0.739245	0.665605	0.61522	0.564835	0.51445	0.426092	0.334683	0.270841	0.211735	0.169359	0.132104	0.118585	0.116389	0.118129	0.122457	0.127728	0.133852	0.144532	0.16089	0.192652	0.253174	0.338421	0.488854	0.633906	0.754544	0.871319	0.953548	1.03329	1.02199	1.01069	1.00074	0.990847	0.945536	0.89533	0.829872
0.641226	0.574349	0.522954	0.478004	0.456192	0.438727	0.427275	0.409945	0.390223	0.366773	0.349611	0.347211	0.341769	0.334229	0.33664	0.339315	0.337215	0.333757	0.328772	0.3187	0.306565	0.286288	0.267574	0.25176	0.240282	0.231212	0.221114	0.213886	0.216555	0.220164	0.224633	0.234085	0.242927	0.237414	0.231608	0.225363	0.212476	0.196662	0.206001	0.221132	0.250305	0.309277	0.390431	0.527586	0.668113	0.780815	0.851533	0.87142	0.815157	0.732323
0.153184	0.173006	0.189248	0.204193	0.211016	0.21358	0.215509	0.216981	0.220792	0.22685	0.235127	0.246445	0.255741	0.260682	0.263133	0.257044	0.249143	0.230587	0.212949	0.207265	0.201581	0.197988	0.194413	0.19778	0.201804	0.227714	0.258151	0.32123	0.395706	0.434564	0.454975	0.475385	0.488436	0.490493	0.475963	0.427544	0.401943	0.445232	0.502275	0.631089	0.760309	0.894058	1.02764	1.09041	1.15318	1.07476	0.984128	0.862505	0.735155	0.614
0.283384	0.361439	0.442521	0.502847	0.534172	0.502925	0.454294	0.394307	0.321609	0.254185	0.217479	0.190412	0.174242	0.154618	0.133824	0.111665	0.0915209	0.0753995	0.0654992	0.0593801	0.0599618	0.0582756	0.0447444	0.0317036	0.0191804	0.00962533	0.00195471	0.00952559	0.018358	0.0295238	0.0333641	0.0330674	0.0342509	0.0339253	0.0276799	0.0281848	0.0353443	0.0501073	0.0695101	0.119314	0.178565	0.254037	0.331877	0.410958	0.502051	0.587918	0.654203	0.680476	0.669916	0.59487
0.2919	0.285527	0.294111	0.309325	0.32799	0.349693	0.373548	0.400304	0.429972	0.475241	0.541583	0.626387	0.745629	0.851665	0.922566	0.984518	1.01085	1.02986	0.997604	0.964973	0.925511	0.88605	0.829894	0.773376	0.695535	0.615399	0.563897	0.518244	0.528611	0.557217	0.60694	0.666951	0.720169	0.768854	0.80212	0.820355	0.840183	0.862135	0.877936	0.882611	0.877557	0.847236	0.814918	0.773504	0.729399	0.663021	0.596975	0.551785	0.506595	0.461405
0.16773	0.167396	0.169921	0.172446	0.168691	0.164747	0.158823	0.15261	0.146397	0.135373	0.124044	0.119906	0.116954	0.113796	0.110577	0.109048	0.108294	0.108634	0.109748	0.131529	0.17536	0.226592	0.289025	0.352835	0.419684	0.472328	0.476767	0.47723	0.451452	0.425416	0.392675	0.359933	0.327498	0.299585	0.271671	0.247435	0.223292	0.206727	0.191184	0.175842	0.160585	0.153404	0.151189	0.151763	0.154939	0.160714	0.170367	0.180961	0.193639	0.205554
0.141279	0.145043	0.147209	0.146849	0.150386	0.162855	0.186697	0.250903	0.31817	0.406738	0.495254	0.582556	0.669857	0.712465	0.75219	0.755696	0.752598	0.719832	0.677676	0.618989	0.552131	0.480066	0.404121	0.351047	0.32187	0.292694	0.267106	0.246834	0.231236	0.226484	0.220833	0.211894	0.202662	0.191443	0.180449	0.174534	0.168619	0.181918	0.196475	0.236306	0.281146	0.340455	0.405503	0.46849	0.530267	0.582295	0.626144	0.641157	0.622101	0.596708
0.711107	0.757245	0.806096	0.845785	0.883933	0.889991	0.886355	0.87666	0.864291	0.844971	0.821345	0.809812	0.808506	0.808544	0.810112	0.824988	0.860541	0.887998	0.898173	0.901826	0.88564	0.86452	0.819144	0.772683	0.715669	0.658095	0.571623	0.485152	0.399448	0.313792	0.257348	0.205324	0.195793	0.197221	0.251914	0.327259	0.474378	0.661382	0.841244	1.01573	1.13418	1.19579	1.18749	1.08281	0.971145	0.846429	0.725471	0.614991	0.513477	0.450637
0.233758	0.243112	0.252827	0.266518	0.284902	0.299235	0.307141	0.318523	0.337484	0.355363	0.36955	0.383274	0.394417	0.405232	0.41206	0.418888	0.430549	0.442239	0.457596	0.473289	0.472893	0.469519	0.470285	0.472303	0.475053	0.478127	0.478876	0.47821	0.469507	0.454198	0.436224	0.415333	0.394887	0.375099	0.36003	0.354579	0.348904	0.342574	0.342069	0.367918	0.390976	0.390592	0.38986	0.377306	0.364752	0.333378	0.301029	0.281596	0.263978	0.25257
0.473545	0.441733	0.411429	0.383568	0.372374	0.359757	0.345054	0.335052	0.327079	0.316906	0.310113	0.311871	0.304298	0.289901	0.309198	0.339524	0.400617	0.490172	0.613595	0.741231	0.869232	0.973824	1.06072	1.11258	1.1226	1.10789	1.06479	1.01371	0.942292	0.86944	0.795196	0.719021	0.643514	0.579079	0.521103	0.473363	0.443028	0.420886	0.430572	0.453519	0.510617	0.579403	0.657408	0.749975	0.833918	0.852143	0.862404	0.862452	0.812826	0.745734
0.110353	0.103433	0.0966689	0.0937262	0.0914611	0.101044	0.114258	0.121675	0.126245	0.126888	0.124631	0.127319	0.13514	0.146004	0.161677	0.178707	0.19886	0.214406	0.213272	0.211939	0.209234	0.206319	0.197206	0.188092	0.176109	0.16392	0.142638	0.119581	0.100435	0.0827171	0.069932	0.0598642	0.0548631	0.0538431	0.058703	0.0700255	0.0837911	0.101685	0.118697	0.1331	0.144859	0.142077	0.138892	0.129782	0.120672	0.10509	0.0893245	0.0857682	0.0837518	0.0744816
0.125681	0.122759	0.119844	0.118565	0.117285	0.117443	0.11773	0.116429	0.114772	0.111973	0.10874	0.109427	0.112336	0.112925	0.111648	0.11128	0.111938	0.109886	0.103528	0.100313	0.104735	0.109428	0.11528	0.120927	0.124889	0.128566	0.119459	0.110353	0.103433	0.0966689	0.0937262	0.0914611	0.101044	0.114258	0.121675	0.126245	0.126888	0.124631	0.127319	0.13514	0.146004	0.161677	0.178707	0.19886	0.214406	0.213272	0.211939	0.209234	0.206319	0.197206
0.246834	0.231236	0.226484	0.220833	0.211894	0.202662	0.191443	0.180449	0.174534	0.168619	0.181918	0.196475	0.236306	0.281146	0.340455	0.405503	0.46849	0.530267	0.582295	0.626144	0.641157	0.622101	0.596708	0.560617	0.515955	0.448376	0.385318	0.341838	0.298177	0.25285	0.207561	0.181574	0.155586	0.140352	0.126085	0.119315	0.114065	0.115035	0.118147	0.122353	0.127171	0.132729	0.138898	0.139428	0.133208	0.12638	0.118512	0.108186	0.0916467	0.0768465
0.291555	0.271369	0.251782	0.238968	0.227587	0.216207	0.209834	0.204149	0.197516	0.190639	0.184881	0.179634	0.176879	0.175891	0.175284	0.175064	0.17493	0.174921	0.173919	0.170797	0.168262	0.16773	0.167396	0.169921	0.172446	0.168691	0.164747	0.158823	0.15261	0.146397	0.135373	0.124044	0.119906	0.116954	0.113796	0.110577	0.109048	0.108294	0.108634	0.109748	0.131529	0.17536	0.226592	0.289025	0.352835	0.419684	0.472328	0.476767	0.47723	0.451452
0.0606272	0.0572497	0.0502304	0.0468038	0.04672	0.0462604	0.0452927	0.0445974	0.0444765	0.0441003	0.0428586	0.0413846	0.0383721	0.0353885	0.0332507	0.031113	0.0349123	0.0390853	0.0464029	0.0543232	0.0663008	0.0796658	0.0929229	0.106125	0.118799	0.131084	0.139778	0.144748	0.148857	0.151711	0.150375	0.140068	0.129226	0.116561	0.10312	0.084935	0.0672524	0.0615107	0.055769	0.0604559	0.0657288	0.0813755	0.0986218	0.125871	0.155908	0.225773	0.313067	0.430845	0.568311	0.696009
0.057071	0.0523033	0.0513308	0.055964	0.0667583	0.0798815	0.0969401	0.113159	0.126889	0.1381	0.135448	0.132412	0.123727	0.115042	0.100187	0.0851568	0.0817664	0.0798441	0.0710064	0.0601932	0.0584791	0.0607846	0.0573983	0.0503608	0.0469253	0.0468413	0.0463805	0.0454103	0.0447132	0.044592	0.0442148	0.0429699	0.041492	0.0384717	0.0354803	0.033337	0.0311937	0.035003	0.0391867	0.0465234	0.0544642	0.0664729	0.0798726	0.0931642	0.1064	0.119108	0.131425	0.140141	0.145123	0.149244
0.846439	0.943788	1.02546	1.05608	1.07812	1.05318	1.02716	0.988075	0.948987	0.875744	0.802106	0.688556	0.571165	0.459417	0.348781	0.281373	0.227947	0.190418	0.160399	0.14805	0.1472	0.161746	0.190054	0.22478	0.267413	0.305795	0.337124	0.370871	0.410667	0.459913	0.545623	0.625331	0.666114	0.706898	0.747681	0.771864	0.793903	0.757423	0.707127	0.693824	0.693831	0.714422	0.745653	0.782624	0.823697	0.83721	0.823053	0.774928	0.68047	0.576634
0.238754	0.253116	0.275158	0.305693	0.361759	0.428659	0.547426	0.656259	0.674893	0.69211	0.658615	0.625121	0.521487	0.414254	0.34842	0.2885	0.257965	0.234639	0.226832	0.224919	0.224174	0.224057	0.224063	0.224159	0.237586	0.264965	0.295152	0.329378	0.358403	0.377065	0.390601	0.389564	0.396613	0.440104	0.487513	0.567412	0.645697	0.671777	0.697856	0.635432	0.568916	0.482568	0.393465	0.338547	0.2919	0.285527	0.294111	0.309325	0.32799	0.349693
NaN	NaN	NaN	NaN	NaN	NaN	NaN	NaN	NaN	NaN	NaN	NaN	NaN	NaN	NaN	NaN	NaN	NaN	NaN	NaN	NaN	0.131125	0.0884283	0.056473	0.0324143	0.026917	0.0246663	0.0242863	0.0218537	0.0168171	0.00995733	0.00248879	-0.0010148	-0.0026432	-4.2516e-06	0.00365035	0.00800077	0.0221636	0.0442303	0.0985075	0.155506	0.215725	0.251535	0.277233	0.25202	0.220216	0.174555	0.134987	0.0993048	0.0755126
0.418781	0.320831	0.236595	0.167924	0.115994	0.0757794	0.0525654	0.0375696	0.0392595	0.0415857	0.0458639	0.0563197	0.0969789	0.137414	0.17573	0.214326	0.264626	0.314927	0.330416	0.343974	0.343591	0.341187	0.32936	0.315159	0.301707	0.288544	0.292376	0.3054	0.3156	0.323726	0.32247	0.311479	0.290582	0.255824	0.227135	0.21022	0.211136	0.262122	0.309901	0.344025	0.373045	0.362558	0.351029	0.313417	0.275804	0.261011	0.247011	0.31889	0.401146	0.501333
0.0817883	0.080548	0.0726702	0.0615969	0.0495701	0.0369907	0.0286872	0.0281942	0.0265737	0.0243243	0.0159361	0.00713188	-0.00151025	-0.00647134	-0.00784472	-0.00777118	-0.00685995	-0.000808982	0.00384025	0.00611193	0.00781957	0.00923542	0.0103349	0.0114503	0.0126749	0.0163054	0.0221253	0.0255002	0.028602	0.0343537	0.0392896	0.0429386	0.0409914	0.0363642	0.0281849	0.0200482	0.0124266	0.0118706	0.0173175	0.0267662	0.0376097	0.0527437	0.0642948	0.0705851	0.0681794	0.0619265	0.0526757	0.0435207	0.0347785	0.0291491
0.295863	0.311203	0.321767	0.32826	0.323729	0.300259	0.261422	0.221962	0.184222	0.158972	0.14245	0.138153	0.129964	0.120145	0.116138	0.109867	0.0976996	0.0956694	0.101312	0.0981958	0.0945459	0.0963204	0.0955973	0.0916122	0.0930797	0.0966157	0.0968975	0.0978352	0.100317	0.104465	0.109787	0.123784	0.137186	0.141113	0.140777	0.135247	0.122266	0.106438	0.0829226	0.0602123	0.0392508	0.0248958	0.0148827	0.00943488	0.00525578	0.00433288	0.00318995	0.0017968	0.00246553	0.00382916
0.0183444	0.0197998	0.0204143	0.0191911	0.0170153	0.0175463	0.0181478	0.0185419	0.0188925	0.0192055	0.021005	0.0228036	0.0224519	0.0220117	0.0214474	0.0185927	0.0148076	0.0131691	0.0126979	0.0150051	0.0149089	0.0131351	0.0140368	0.0150877	0.0151534	0.0139766	0.0113873	0.0083098	0.00516528	0.00353056	0.00304402	0.00471739	0.00866415	0.0138891	0.0173758	0.0251844	0.0482057	0.0981022	0.172886	0.238071	0.297046	0.322108	0.324523	0.292726	0.263292	0.234914	0.222061	0.211679	0.207092	0.206365
NaN	NaN	NaN	NaN	NaN	NaN	NaN	NaN	NaN	NaN	NaN	NaN	NaN	NaN	NaN	NaN	0.211969	0.299398	0.38511	0.423209	0.461309	0.476504	0.490859	0.477752	0.461493	0.484298	0.515413	0.536601	0.554449	0.56431	0.570106	0.575902	0.561018	0.534821	0.533867	0.552427	0.610177	0.710687	0.817469	0.933578	1.02423	1.06177	1.06644	0.964556	0.855863	0.711934	0.572569	0.483214	0.39425	0.354938
0.021005	0.0228036	0.0224519	0.0220117	0.0214474	0.0185927	0.0148076	0.0131691	0.0126979	0.0150051	0.0149089	0.0131351	0.0140368	0.0150877	0.0151534	0.0139766	0.0113873	0.0083098	0.00516528	0.00353056	0.00304402	0.00471739	0.00866415	0.0138891	0.0173758	0.0251844	0.0482057	0.0981022	0.172886	0.238071	0.297046	0.322108	0.324523	0.292726	0.263292	0.234914	0.222061	0.211679	0.207092	0.206365	0.208544	0.232774	0.26444	0.317397	0.376754	0.443952	0.52255	0.603827	0.650534	0.694983
0.767371	0.722503	0.634434	0.537623	0.424603	0.324896	0.259627	0.1994	0.15877	0.122649	0.116023	0.109436	0.103473	0.0975094	0.111462	0.125644	0.142006	0.158578	0.177952	0.197859	0.221154	0.245471	0.250513	0.247135	0.244288	0.241764	0.234469	0.223234	0.218804	0.221938	0.228062	0.238754	0.253116	0.275158	0.305693	0.361759	0.428659	0.547426	0.656259	0.674893	0.69211	0.658615	0.625121	0.521487	0.414254	0.34842	0.2885	0.257965	0.234639	0.226832
0.566011	0.668811	0.785822	0.890632	0.969631	1.01057	1.02709	1.03034	1.02717	1.00246	0.976866	0.950289	0.88702	0.812448	0.74116	0.673764	0.613991	0.556114	0.49937	0.473312	0.448367	0.416498	0.398984	0.396367	0.371576	0.341034	0.318064	0.291033	0.256631	0.224163	0.192769	0.167535	0.144371	0.126948	0.116443	0.112642	0.101694	0.0889979	0.0772221	0.065858	0.0551879	0.0495109	0.0464005	0.0463018	0.0453837	0.0412989	0.0384253	0.0366479	0.0357008	0.0351716
Time relative to onset of a reversal (s)
-20	-19.5	-19	-18.5	-18	-17.5	-17	-16.5	-16	-15.5	-15	-14.5	-14	-13.5	-13	-12.5	-12	-11.5	-11	-10.5	-10	-9.5	-9	-8.5	-8	-7.5	-7	-6.5	-6	-5.5	-5	-4.5	-4	-3.5	-3	-2.5	-2	-1.5	-1	-0.5	0	0.5	1	1.5	2	2.5	3	3.5	4	4.5
Calcium activity in AIY (dR/R0)
0.282352	0.25834	0.23499	0.212488	0.191478	0.172093	0.156954	0.143005	0.134048	0.125681	0.122759	0.119844	0.118565	0.117285	0.117443	0.11773	0.116429	0.114772	0.111973	0.10874	0.109427	0.112336	0.112925	0.111648	0.11128	0.111938	0.109886	0.103528	0.100313	0.104735	0.109428	0.11528	0.120927	0.124889	0.128566	0.119459	0.110353	0.103433	0.0966689	0.0937262	0.0914611	0.101044	0.114258	0.121675	0.126245	0.126888	0.124631	0.127319	0.13514	0.146004
0.668962	0.597683	0.53403	0.4862	0.444113	0.416825	0.392642	0.370965	0.352076	0.334451	0.321502	0.308053	0.293948	0.286524	0.281982	0.296183	0.3262	0.391168	0.493882	0.621285	0.811793	0.996704	1.12728	1.20717	1.23295	1.18305	1.1106	1.02754	0.950675	0.884694	0.805338	0.718961	0.622621	0.527551	0.438148	0.36487	0.305615	0.278233	0.258791	0.248901	0.242694	0.241699	0.237905	0.232952	NaN	NaN	NaN	NaN	NaN	NaN
0.517457	0.529668	0.534505	0.536235	0.536591	0.531315	0.543367	0.581911	0.62834	0.678336	0.775388	0.87172	0.963808	1.02812	1.07126	1.06354	1.04311	0.998038	0.958557	0.92601	0.86971	0.80448	0.722335	0.642165	0.566084	0.507416	0.459477	0.426492	0.398433	0.383881	0.367764	0.350066	0.337079	0.325196	0.311766	0.305181	0.309911	0.318968	0.330158	0.32659	0.321053	0.311441	0.305026	0.301235	0.33917	0.391351	0.484628	0.601209	0.748916	0.873642
0.242568	0.295579	0.340947	0.398729	0.471292	0.566011	0.668811	0.785822	0.890632	0.969631	1.01057	1.02709	1.03034	1.02717	1.00246	0.976866	0.950289	0.88702	0.812448	0.74116	0.673764	0.613991	0.556114	0.49937	0.473312	0.448367	0.416498	0.398984	0.396367	0.371576	0.341034	0.318064	0.291033	0.256631	0.224163	0.192769	0.167535	0.144371	0.126948	0.116443	0.112642	0.101694	0.0889979	0.0772221	0.065858	0.0551879	0.0495109	0.0464005	0.0463018	0.0453837
0.435709	0.406601	0.376751	0.342916	0.305325	0.275216	0.248461	0.235729	0.232208	0.242855	0.255391	0.268788	0.279592	0.288642	0.293165	0.308413	0.331879	0.361847	0.394184	0.433773	0.474345	0.516142	0.541284	0.561193	0.601909	0.628534	0.625802	0.61901	0.609704	0.58798	0.571512	0.580415	0.587043	0.591364	0.58603	0.576395	0.547562	0.533824	0.545187	0.550077	0.551759	0.565811	0.580216	0.594208	0.621715	0.660387	0.727911	0.802113	0.884158	0.96548
0.112958	0.109763	0.108246	0.107496	0.107834	0.10894	0.13056	0.174069	0.224923	0.286897	0.350237	0.416594	0.46885	0.473257	0.473716	0.448128	0.422284	0.389783	0.357283	0.325087	0.297379	0.269671	0.245614	0.221648	0.205205	0.189776	0.174548	0.159403	0.152274	0.150076	0.150645	0.153798	0.159531	0.169113	0.179629	0.192214	0.20404	0.213311	0.223416	0.238771	0.253893	0.264675	0.275457	0.288255	0.313347	0.338162	0.358531	0.3789	0.406585	0.434446
0.132069	0.123407	0.114744	0.0999275	0.0849363	0.0815547	0.0796373	0.0708225	0.0600373	0.0583277	0.0606272	0.0572497	0.0502304	0.0468038	0.04672	0.0462604	0.0452927	0.0445974	0.0444765	0.0441003	0.0428586	0.0413846	0.0383721	0.0353885	0.0332507	0.031113	0.0349123	0.0390853	0.0464029	0.0543232	0.0663008	0.0796658	0.0929229	0.106125	0.118799	0.131084	0.139778	0.144748	0.148857	0.151711	0.150375	0.140068	0.129226	0.116561	0.10312	0.084935	0.0672524	0.0615107	0.055769	0.0604559
0.931625	0.81834	0.72457	0.636769	0.561528	0.50691	0.483266	0.501284	0.537781	0.642338	0.74253	0.828886	0.927407	1.03504	1.09298	1.14033	1.17266	1.17305	1.13456	1.08518	1.03227	0.984754	0.933326	0.873954	0.810907	0.745638	0.693298	0.647101	0.619658	0.612637	0.625863	0.624501	0.618099	0.598436	0.561613	0.496938	0.443989	0.396704	0.361173	0.329909	0.309638	0.291674	0.275571	0.261539	0.248446	0.238827	0.228837	0.218359	0.212844	0.20947
0.184881	0.179634	0.176879	0.175891	0.175284	0.175064	0.17493	0.174921	0.173919	0.170797	0.168262	0.16773	0.167396	0.169921	0.172446	0.168691	0.164747	0.158823	0.15261	0.146397	0.135373	0.124044	0.119906	0.116954	0.113796	0.110577	0.109048	0.108294	0.108634	0.109748	0.131529	0.17536	0.226592	0.289025	0.352835	0.419684	0.472328	0.476767	0.47723	0.451452	0.425416	0.392675	0.359933	0.327498	0.299585	0.271671	0.247435	0.223292	0.206727	0.191184
0.274448	0.268098	0.259857	0.240502	0.222106	0.216178	0.210249	0.206502	0.202773	0.206285	0.210482	0.237506	0.269252	0.335043	0.412722	0.453251	0.474539	0.495827	0.509439	0.511585	0.496431	0.44593	0.419227	0.464378	0.523873	0.658227	0.793004	0.932504	1.07183	1.1373	1.20277	1.12098	1.02645	0.899594	0.766768	0.640403	0.515942	0.429837	0.361932	0.321194	0.298431	0.278991	0.262698	0.25005	0.242234	0.233091	0.221386	0.220801	0.251601	0.295365
0.437794	0.369628	0.317147	0.270142	0.243367	0.216592	0.192408	0.179201	0.166313	0.156462	0.146611	0.139265	0.131936	0.127046	0.122436	0.124058	0.127207	0.135645	0.146254	0.211141	0.30865	0.427711	0.567102	0.709411	0.855743	0.95914	0.977076	0.985965	0.967476	0.948988	0.92987	0.909118	0.891809	0.888762	0.882965	0.852358	0.821744	0.754249	0.686754	0.605959	0.523945	0.450041	0.377752	0.311176	0.246505	0.197787	0.157164	0.12652	0.103246	0.0844109
0.86618	0.864366	0.859388	0.842523	0.822222	0.778862	0.725219	0.661928	0.59229	0.516495	0.434732	0.371189	0.335953	0.305017	0.284721	0.26802	0.267577	0.266889	0.263932	0.260974	0.258969	0.256979	0.262011	0.267934	0.266405	0.263044	0.264677	0.268384	0.26599	0.259866	0.261507	0.270361	0.276581	0.279313	0.276734	0.26405	0.251308	0.238401	0.223704	0.200523	0.178562	0.168902	0.159221	0.144646	0.130072	0.121847	0.114189	0.10244	0.0898668	0.073442
-0.0155372	-0.0234599	-0.028193	-0.0329261	-0.02403	-0.0132082	0.00157511	0.0174013	0.032986	0.0484708	0.0568089	0.0607965	0.0680583	0.0782261	0.0900824	0.104112	0.119138	0.136158	0.156553	0.18767	0.226333	0.309496	0.391089	0.448616	0.506142	0.515173	0.523061	0.53095	0.469509	0.398687	0.33773	0.279584	0.23612	0.199349	0.176414	0.163077	0.15168	0.142217	0.132628	0.122863	0.117272	0.121608	0.124703	0.122502	0.12178	0.134057	0.146212	0.13182	0.117429	0.117315
0.240732	0.203244	0.17986	0.166263	0.154643	0.144995	0.135219	0.125263	0.119563	0.123984	0.127139	0.124895	0.124159	0.136676	0.149068	0.134395	0.119723	0.119606	0.120779	0.120257	0.106584	0.0937395	0.11433	0.134921	0.182638	0.23239	0.280299	0.327832	0.376126	0.424691	0.474331	0.524547	0.559074	0.581631	0.581629	0.557558	0.513119	0.437794	0.369628	0.317147	0.270142	0.243367	0.216592	0.192408	0.179201	0.166313	0.156462	0.146611	0.139265	0.131936
0.376314	0.360612	0.319932	0.279205	0.240819	0.206657	0.176044	0.148972	0.123198	0.101696	0.0806583	0.0602945	0.048809	0.0411987	0.0341755	0.0281312	0.0246758	0.0209619	0.0170453	0.0158539	0.0180053	0.0381633	0.0644747	0.0991074	0.16043	0.232505	0.320187	0.401655	0.467877	0.508291	0.529843	0.507714	0.476741	0.434351	0.390597	0.34512	0.29849	0.251575	0.212131	0.175111	0.143572	0.11814	0.0968667	0.0783287	0.0604523	0.0440241	0.0314023	0.0232608	0.017389	0.0123712
NaN	NaN	NaN	NaN	NaN	NaN	NaN	NaN	NaN	NaN	NaN	NaN	NaN	0.131125	0.0884283	0.056473	0.0324143	0.026917	0.0246663	0.0242863	0.0218537	0.0168171	0.00995733	0.00248879	-0.0010148	-0.0026432	-4.2516e-06	0.00365035	0.00800077	0.0221636	0.0442303	0.0985075	0.155506	0.215725	0.251535	0.277233	0.25202	0.220216	0.174555	0.134987	0.0993048	0.0755126	0.0551957	0.0441696	0.0399867	0.0433662	0.0449989	0.0457282	0.0397837	0.0337147
0.196475	0.236306	0.281146	0.340455	0.405503	0.46849	0.530267	0.582295	0.626144	0.641157	0.622101	0.596708	0.560617	0.515955	0.448376	0.385318	0.341838	0.298177	0.25285	0.207561	0.181574	0.155586	0.140352	0.126085	0.119315	0.114065	0.115035	0.118147	0.122353	0.127171	0.132729	0.138898	0.139428	0.133208	0.12638	0.118512	0.108186	0.0916467	0.0768465	0.0692272	0.0617941	0.0560557	0.0503173	0.0504417	0.0505943	0.0454293	0.0397423	0.0405305	0.0427151	0.0402086
0.712465	0.75219	0.755696	0.752598	0.719832	0.677676	0.618989	0.552131	0.480066	0.404121	0.351047	0.32187	0.292694	0.267106	0.246834	0.231236	0.226484	0.220833	0.211894	0.202662	0.191443	0.180449	0.174534	0.168619	0.181918	0.196475	0.236306	0.281146	0.340455	0.405503	0.46849	0.530267	0.582295	0.626144	0.641157	0.622101	0.596708	0.560617	0.515955	0.448376	0.385318	0.341838	0.298177	0.25285	0.207561	0.181574	0.155586	0.140352	0.126085	0.119315
0.507714	0.476741	0.434351	0.390597	0.34512	0.29849	0.251575	0.212131	0.175111	0.143572	0.11814	0.0968667	0.0783287	0.0604523	0.0440241	0.0314023	0.0232608	0.017389	0.0123712	0.0097178	0.00585688	-0.000525431	0.0139489	0.041647	0.0977572	0.156932	0.215728	0.257367	0.280151	0.28222	0.278697	0.289279	0.299539	0.309176	0.314904	0.318327	0.29598	0.26898	0.232969	0.19477	0.154325	0.121192	0.0908839	0.0710156	0.054005	0.0421178	0.0367632	0.034985	0.0306907	0.0253608
NaN	NaN	NaN	NaN	NaN	NaN	NaN	NaN	NaN	NaN	NaN	NaN	0.211969	0.299398	0.38511	0.423209	0.461309	0.476504	0.490859	0.477752	0.461493	0.484298	0.515413	0.536601	0.554449	0.56431	0.570106	0.575902	0.561018	0.534821	0.533867	0.552427	0.610177	0.710687	0.817469	0.933578	1.02423	1.06177	1.06644	0.964556	0.855863	0.711934	0.572569	0.483214	0.39425	0.354938	0.315626	0.294663	0.275005	0.277403
0.10874	0.109427	0.112336	0.112925	0.111648	0.11128	0.111938	0.109886	0.103528	0.100313	0.104735	0.109428	0.11528	0.120927	0.124889	0.128566	0.119459	0.110353	0.103433	0.0966689	0.0937262	0.0914611	0.101044	0.114258	0.121675	0.126245	0.126888	0.124631	0.127319	0.13514	0.146004	0.161677	0.178707	0.19886	0.214406	0.213272	0.211939	0.209234	0.206319	0.197206	0.188092	0.176109	0.16392	0.142638	0.119581	0.100435	0.0827171	0.069932	0.0598642	0.0548631
0.337215	0.333757	0.328772	0.3187	0.306565	0.286288	0.267574	0.25176	0.240282	0.231212	0.221114	0.213886	0.216555	0.220164	0.224633	0.234085	0.242927	0.237414	0.231608	0.225363	0.212476	0.196662	0.206001	0.221132	0.250305	0.309277	0.390431	0.527586	0.668113	0.780815	0.851533	0.87142	0.815157	0.732323	0.63553	0.550173	0.487885	0.426459	0.365552	0.33588	0.310932	0.293169	0.278946	0.268214	0.261974	0.256485	0.246977	0.23857	0.231941	0.216553
0.699726	0.65479	0.607776	0.549623	0.490525	0.421094	0.351955	0.311772	0.271588	0.246349	0.222135	0.211417	0.202831	0.184021	0.162422	0.14924	0.139469	0.125494	0.109127	0.0973666	0.0891504	0.0900336	0.100518	0.136127	0.207684	0.312114	0.480696	0.632225	0.733403	0.819255	0.834809	0.850363	0.862431	0.746949	0.631466	0.507843	0.383816	0.267098	0.151408	0.0798874	0.0191066	-0.0107963	-0.0293017	-0.0314572	-0.0250465	0.0107145	0.0677291	0.147576	0.249696	0.367453
0.0218213	0.0166045	0.0251525	0.0400285	0.0746612	0.131103	0.210049	0.326211	0.450832	0.547993	0.623928	0.661569	0.634034	0.570595	0.478987	0.390011	0.317442	0.256895	0.20793	0.176081	0.149299	0.130199	0.113814	0.101976	0.105526	0.116936	0.158093	0.212884	0.306269	0.401053	0.497098	0.573025	0.641764	0.687717	0.718889	0.727024	0.709533	0.679928	0.603225	0.526437	0.454059	0.389648	0.331928	0.280884	0.232287	0.191746	0.15208	0.113684	0.0920284	0.0776793
0.046314	0.0502013	0.0507117	0.0523693	0.0592347	0.0650659	0.0698716	0.0718724	0.0749503	0.0994205	0.128973	0.167307	0.223284	0.288565	0.391184	0.486218	0.548499	0.587645	0.605374	0.605084	0.6091	0.694529	0.78581	0.88649	0.941114	0.973248	0.940664	0.90107	0.848405	0.793083	0.735465	0.672932	0.608766	0.539972	0.477537	0.424608	0.378671	0.33589	0.307701	0.276055	0.233893	0.201521	0.177044	0.153626	0.131339	0.1153	0.100548	0.0875898	0.0781074	0.0700716
0.659621	0.588177	0.516603	0.447736	0.37916	0.324499	0.272925	0.234367	0.200658	0.178376	0.16268	0.149169	0.137579	0.128868	0.123817	0.122602	0.12832	0.133052	0.135126	0.137514	0.141279	0.145043	0.147209	0.146849	0.150386	0.162855	0.186697	0.250903	0.31817	0.406738	0.495254	0.582556	0.669857	0.712465	0.75219	0.755696	0.752598	0.719832	0.677676	0.618989	0.552131	0.480066	0.404121	0.351047	0.32187	0.292694	0.267106	0.246834	0.231236	0.226484
0.0413846	0.0383721	0.0353885	0.0332507	0.031113	0.0349123	0.0390853	0.0464029	0.0543232	0.0663008	0.0796658	0.0929229	0.106125	0.118799	0.131084	0.139778	0.144748	0.148857	0.151711	0.150375	0.140068	0.129226	0.116561	0.10312	0.084935	0.0672524	0.0615107	0.055769	0.0604559	0.0657288	0.0813755	0.0986218	0.125871	0.155908	0.225773	0.313067	0.430845	0.568311	0.696009	0.814685	0.905706	0.958	0.981986	0.945762	0.897642	0.809146	0.719096	0.618447	0.51869	0.443226
0.124631	0.127319	0.13514	0.146004	0.161677	0.178707	0.19886	0.214406	0.213272	0.211939	0.209234	0.206319	0.197206	0.188092	0.176109	0.16392	0.142638	0.119581	0.100435	0.0827171	0.069932	0.0598642	0.0548631	0.0538431	0.058703	0.0700255	0.0837911	0.101685	0.118697	0.1331	0.144859	0.142077	0.138892	0.129782	0.120672	0.10509	0.0893245	0.0857682	0.0837518	0.0744816	0.0631392	0.0613412	0.0637595	0.0602075	0.0528256	0.0492219	0.0491338	0.0486504	0.0476328	0.0469015
0.391307	0.417138	0.440847	0.465921	0.491776	0.512712	0.529838	0.542776	0.551349	0.557128	0.558952	0.565883	0.582654	0.595633	0.598019	0.604607	0.629163	0.651998	0.661871	0.67258	0.702757	0.732934	0.740261	0.746863	0.738929	0.729289	0.724953	0.721757	0.755243	0.801968	0.850362	0.899707	0.93157	0.94906	0.943124	0.909755	0.872034	0.827414	0.786076	0.752555	0.721656	0.701615	0.679968	0.645611	0.611735	0.600952	0.590168	0.583886	0.577869	0.575356
0.0781074	0.0700716	0.0682631	0.0684159	0.0734602	0.0739552	0.0710267	0.0724841	0.074081	0.0723001	0.0743051	0.0812258	0.0867505	0.0917664	0.0989843	0.108763	0.12453	0.136184	0.144951	0.151127	0.158771	0.175775	0.215698	0.283384	0.361439	0.442521	0.502847	0.534172	0.502925	0.454294	0.394307	0.321609	0.254185	0.217479	0.190412	0.174242	0.154618	0.133824	0.111665	0.0915209	0.0753995	0.0654992	0.0593801	0.0599618	0.0582756	0.0447444	0.0317036	0.0191804	0.00962533	0.00195471
0.988336	1.02829	1.01497	0.977522	0.886987	0.790582	0.674373	0.57076	0.545431	0.525837	0.590122	0.654407	0.766225	0.879635	0.950126	1.01566	1.04625	1.06935	1.04266	0.997526	0.952109	0.906539	0.861522	0.816909	0.783338	0.761113	0.738137	0.714124	0.68186	0.634081	0.588434	0.548573	0.511164	0.48412	0.456603	0.425456	0.395061	0.381588	0.368115	0.347462	0.326596	0.3424	0.362681	0.367665	0.369263	0.387008	0.410285	0.409705	0.39731	0.373265
0.243853	0.245668	0.243589	0.242161	0.245906	0.25083	0.286128	0.321425	0.332895	0.34331	0.350653	0.35759	0.345039	0.327706	0.322072	0.320735	0.327052	0.337611	0.35332	0.3729	0.418473	0.493241	0.590873	0.724384	0.846439	0.943788	1.02546	1.05608	1.07812	1.05318	1.02716	0.988075	0.948987	0.875744	0.802106	0.688556	0.571165	0.459417	0.348781	0.281373	0.227947	0.190418	0.160399	0.14805	0.1472	0.161746	0.190054	0.22478	0.267413	0.305795
0.731983	0.775183	0.830731	0.911402	0.97399	1.00436	0.980777	0.927841	0.850516	0.789442	0.790472	0.820964	0.879522	0.936415	0.989329	1.00552	0.988646	0.917032	0.824977	0.722613	0.594305	0.476847	0.397576	0.336026	0.290237	0.254312	0.220865	0.189737	0.158942	0.128661	0.109643	0.0958789	0.0870658	0.0818882	0.0867157	0.0889534	0.0890408	0.0980547	0.108324	0.114915	0.125035	0.140216	0.150135	0.157789	0.158062	0.154527	0.141224	0.122626	0.0999256	0.0793327
0.0281942	0.0265737	0.0243243	0.0159361	0.00713188	-0.00151025	-0.00647134	-0.00784472	-0.00777118	-0.00685995	-0.000808982	0.00384025	0.00611193	0.00781957	0.00923542	0.0103349	0.0114503	0.0126749	0.0163054	0.0221253	0.0255002	0.028602	0.0343537	0.0392896	0.0429386	0.0409914	0.0363642	0.0281849	0.0200482	0.0124266	0.0118706	0.0173175	0.0267662	0.0376097	0.0527437	0.0642948	0.0705851	0.0681794	0.0619265	0.0526757	0.0435207	0.0347785	0.0291491	0.0259877	0.0259607	0.0269585	0.0308881	0.0366672	0.0449769	0.0516039
0.424603	0.324896	0.259627	0.1994	0.15877	0.122649	0.116023	0.109436	0.103473	0.0975094	0.111462	0.125644	0.142006	0.158578	0.177952	0.197859	0.221154	0.245471	0.250513	0.247135	0.244288	0.241764	0.234469	0.223234	0.218804	0.221938	0.228062	0.238754	0.253116	0.275158	0.305693	0.361759	0.428659	0.547426	0.656259	0.674893	0.69211	0.658615	0.625121	0.521487	0.414254	0.34842	0.2885	0.257965	0.234639	0.226832	0.224919	0.224174	0.224057	0.224063
0.221962	0.184222	0.158972	0.14245	0.138153	0.129964	0.120145	0.116138	0.109867	0.0976996	0.0956694	0.101312	0.0981958	0.0945459	0.0963204	0.0955973	0.0916122	0.0930797	0.0966157	0.0968975	0.0978352	0.100317	0.104465	0.109787	0.123784	0.137186	0.141113	0.140777	0.135247	0.122266	0.106438	0.0829226	0.0602123	0.0392508	0.0248958	0.0148827	0.00943488	0.00525578	0.00433288	0.00318995	0.0017968	0.00246553	0.00382916	0.00583377	0.00750924	0.00852358	0.0134037	0.0206477	0.0250609	0.0290525
0.510617	0.579403	0.657408	0.749975	0.833918	0.852143	0.862404	0.862452	0.812826	0.745734	0.710844	0.674978	0.63701	0.623358	0.625235	0.656981	0.693273	0.735086	0.785723	0.845569	0.883506	0.915021	0.942521	0.952591	0.932782	0.901986	0.865566	0.818399	0.767274	0.705677	0.641226	0.574349	0.522954	0.478004	0.456192	0.438727	0.427275	0.409945	0.390223	0.366773	0.349611	0.347211	0.341769	0.334229	0.33664	0.339315	0.337215	0.333757	0.328772	0.3187
0.41206	0.418888	0.430549	0.442239	0.457596	0.473289	0.472893	0.469519	0.470285	0.472303	0.475053	0.478127	0.478876	0.47821	0.469507	0.454198	0.436224	0.415333	0.394887	0.375099	0.36003	0.354579	0.348904	0.342574	0.342069	0.367918	0.390976	0.390592	0.38986	0.377306	0.364752	0.333378	0.301029	0.281596	0.263978	0.25257	0.242672	0.246956	0.256485	0.253106	0.242971	0.234208	0.226428	0.214649	0.198777	0.194675	0.206948	0.220297	0.235681	0.247716
0.208956	0.197593	0.185617	0.174073	0.16708	0.160105	0.157228	0.154351	0.15585	0.157718	0.157221	0.156275	0.15372	0.150584	0.147426	0.144256	0.141085	0.137826	0.134531	0.130791	0.126784	0.128648	0.135802	0.147611	0.165397	0.186963	0.215558	0.24608	0.281926	0.314306	0.331253	0.346629	0.345186	0.34365	0.317602	0.291555	0.271369	0.251782	0.238968	0.227587	0.216207	0.209834	0.204149	0.197516	0.190639	0.184881	0.179634	0.176879	0.175891	0.175284
0.688556	0.571165	0.459417	0.348781	0.281373	0.227947	0.190418	0.160399	0.14805	0.1472	0.161746	0.190054	0.22478	0.267413	0.305795	0.337124	0.370871	0.410667	0.459913	0.545623	0.625331	0.666114	0.706898	0.747681	0.771864	0.793903	0.757423	0.707127	0.693824	0.693831	0.714422	0.745653	0.782624	0.823697	0.83721	0.823053	0.774928	0.68047	0.576634	0.455412	0.348471	0.278466	0.213869	0.17029	0.131548	0.124441	0.117377	0.110981	0.104585	0.11955
0.969631	1.01057	1.02709	1.03034	1.02717	1.00246	0.976866	0.950289	0.88702	0.812448	0.74116	0.673764	0.613991	0.556114	0.49937	0.473312	0.448367	0.416498	0.398984	0.396367	0.371576	0.341034	0.318064	0.291033	0.256631	0.224163	0.192769	0.167535	0.144371	0.126948	0.116443	0.112642	0.101694	0.0889979	0.0772221	0.065858	0.0551879	0.0495109	0.0464005	0.0463018	0.0453837	0.0412989	0.0384253	0.0366479	0.0357008	0.0351716	0.0366581	0.0387241	0.041699	0.0443646
0.516677	0.525502	0.518431	0.500004	0.478841	0.452381	0.436237	0.432441	0.430176	0.428871	0.437889	0.456193	0.492991	0.523449	0.550141	0.579908	0.608216	0.630161	0.653471	0.678111	0.691398	0.68417	0.503539	0.382187	0.355332	0.320041	0.280755	0.383696	0.446365	0.385515	0.3324	0.28542	0.252258	0.225306	0.220908	0.22164	0.228989	0.24379	0.261267	0.275191	0.281193	0.270031	0.264111	0.261559	0.251982	0.244319	0.247724	0.244455	0.23418	0.220163
0.0286034	0.0288114	0.0295678	0.0839683	0.207215	0.419621	0.664776	0.849013	0.981839	0.996078	0.923999	0.792082	0.678888	0.572425	0.486662	0.41131	0.348424	0.314849	0.291892	0.284059	0.284007	0.300523	0.300566	0.289976	0.266419	0.238708	0.199264	0.167762	0.145137	0.124698	0.105081	0.0880509	0.0721934	0.0586452	0.048593	0.04064	0.0388123	0.0383334	0.0408927	0.0402726	0.0363338	0.0307974	0.0247842	0.0184947	0.0143431	0.0140966	0.0132864	0.0121617	0.00796779	0.00356582
1.11182	1.11481	1.11117	1.09658	1.07169	1.00753	0.94929	0.897469	0.86081	0.831633	0.845497	0.865041	0.894751	0.924049	0.953127	0.960413	0.956812	0.922378	0.880901	0.833192	0.78486	0.738866	0.711592	0.671608	0.61331	0.553887	0.493988	0.427853	0.372251	0.342654	0.316602	0.293099	0.278753	0.26716	0.262719	0.258669	0.255076	0.246053	0.235037	0.219548	0.205097	0.192663	0.183712	0.17678	0.17567	0.174586	0.171937	0.170243	0.16946	0.164662
0.0921405	0.0797488	0.0665435	0.0545393	0.0449322	0.0390324	0.0353859	0.0357326	0.0347277	0.0266642	0.0188928	0.01143	0.00573595	0.00116486	0.00567651	0.0109399	0.0175939	0.0198824	0.0197056	0.0204109	0.0202168	0.0164951	0.0167959	0.0210624	0.0298601	0.0414226	0.0711018	0.106411	0.151386	0.197773	0.244899	0.299183	0.350353	0.389854	0.40551	0.399218	0.354496	0.299695	0.235607	0.179682	0.136788	0.112659	0.0976341	0.0774676	0.0592852	0.0476857	0.0360003	0.0242412	0.0191405	0.0158015
0.296778	0.269705	0.233597	0.195295	0.154741	0.121518	0.0911288	0.0712069	0.0541505	0.0422312	0.0368622	0.0350793	0.0307734	0.0254291	0.0170762	0.0106273	0.0060028	0.00848237	0.0142542	0.0358009	0.0578907	0.080885	0.111436	0.145821	0.172039	0.197132	0.219978	0.241098	0.260674	0.273069	0.282059	0.275685	0.260588	0.231978	0.201428	0.169967	0.143303	0.118908	0.100624	0.0850184	0.071648	0.0619386	0.0532184	0.0463506	0.0399578	0.0342502	0.0299628	0.0262911	0.0226465	0.0193164
0.0141974	0.0153641	0.0132897	0.0124168	0.0146098	0.0137105	0.0104979	0.0101676	0.0103909	0.0111031	0.0137569	0.0189169	0.0221388	0.024646	0.0288145	0.0335582	0.0396379	0.0581875	0.0854329	0.141995	0.205325	0.282113	0.352531	0.415276	0.452201	0.479772	0.495458	0.506199	0.506345	0.490239	0.46358	0.41259	0.357829	0.299043	0.246001	0.199418	0.162888	0.129916	0.104315	0.0816776	0.0649155	0.0515744	0.0403	0.0317846	0.0246943	0.0222418	0.0188405	0.0144432	0.0120023	0.0101988
0.711084	0.627638	0.601702	0.580095	0.558487	0.596368	0.650331	0.724275	0.806645	0.863904	0.906378	0.925621	0.925139	0.916845	0.899644	0.886077	0.87812	0.868929	0.857125	0.847106	0.842596	0.840061	0.847238	0.854975	0.867942	0.880599	0.877129	0.873658	0.816967	0.757286	0.69514	0.632642	0.560893	0.486714	0.429697	0.379406	0.334647	0.293022	0.263757	0.243971	0.220337	0.192566	0.169517	0.153444	0.137914	0.123516	0.111764	0.108224	0.103027	0.0893767
0.605525	0.601239	0.595225	0.609947	0.6274	0.672866	0.725195	0.796943	0.875822	0.922784	0.952499	0.960144	0.951341	0.944413	0.939444	0.926096	0.900542	0.867214	0.817578	0.761854	0.686312	0.61013	0.530598	0.452749	0.398638	0.344528	0.371902	0.400923	0.473534	0.550742	0.605375	0.655259	0.65555	0.639152	0.599663	0.549014	0.501313	0.455578	0.394969	0.319603	0.24355	0.166579	0.093593	0.0279549	-0.0210893	-0.0264734	-0.0302384	-0.0276775	-0.0252299	-0.0235875
0.997882	0.937853	0.86851	0.877811	0.904827	0.900767	0.917268	0.967547	0.983273	0.982087	0.996191	0.994425	0.945267	0.9091	0.883541	0.850753	0.81811	0.794872	0.769053	0.739808	0.748786	0.772106	0.774568	0.775124	0.771412	0.746101	0.706494	0.688036	0.676326	0.683041	0.673849	0.647478	0.621187	0.595789	0.582526	0.586036	0.61938	0.65375	0.688666	0.69665	0.705543	0.722234	0.732459	0.736996	0.739098	0.73731	0.71032	0.678234	0.638845	0.611019
[truncated: 131 more columns]

## Sheet: Fig 3B
Time relative to onset of a forward run (s)
-20	-19.5	-19	-18.5	-18	-17.5	-17	-16.5	-16	-15.5	-15	-14.5	-14	-13.5	-13	-12.5	-12	-11.5	-11	-10.5	-10	-9.5	-9	-8.5	-8	-7.5	-7	-6.5	-6	-5.5	-5	-4.5	-4	-3.5	-3	-2.5	-2	-1.5	-1	-0.5	0	0.5	1	1.5	2	2.5	3	3.5	4	4.5
Calcium activity in AIY (dR/R0)
0.630487	0.796473	0.90496	0.957359	0.980321	0.984483	0.929712	0.858184	0.771557	0.653166	0.531105	0.418238	0.317023	0.226299	0.162132	0.1095	0.0861212	0.0692464	0.0582233	0.0526721	0.0490552	0.0496197	0.0517018	0.0551504	0.0618624	0.0742131	0.0866042	0.0990081	0.111333	0.123237	0.134477	0.150712	0.168314	0.1715	0.174807	0.178306	0.180224	0.183074	0.217216	0.283241	0.39981	0.484289	0.554418	0.592592	0.581357	0.491791	0.428797	0.376826	0.325395	0.274582
0.341194	0.4203	0.461572	0.483251	0.50493	0.518792	0.520977	0.505545	0.454116	0.426923	0.472904	0.533491	0.670311	0.807563	0.949624	1.0915	1.15818	1.22485	1.14156	1.04529	0.91611	0.780845	0.65216	0.525414	0.437728	0.368577	0.32709	0.30391	0.284113	0.26752	0.254641	0.246682	0.23737	0.225451	0.224855	0.25622	0.300787	0.404132	0.513883	0.675777	0.8361	0.950698	1.06529	1.09341	1.11747	1.07995	1.03426	0.973093	0.908311	0.852681
0.0352451	0.0260353	0.0181803	0.0123591	0.0110556	0.0116863	0.0151148	0.0206016	0.0291732	0.0388404	0.0484913	0.0512055	0.0559778	0.0638346	0.0718643	0.0807524	0.10853	0.135069	0.159586	0.181462	0.200605	0.193002	0.182468	0.167149	0.157927	0.151315	0.159488	0.17751	0.235035	0.297484	0.364194	0.394217	0.399762	0.371546	0.336568	0.289468	0.282034	0.303276	0.332855	0.3697	0.428979	0.489482	0.551027	0.663431	0.780511	0.88334	0.945686	0.973573	0.973507	0.973371
0.389384	0.353237	0.321266	0.291484	0.270343	0.249202	0.257807	0.270006	0.286736	0.306863	0.330365	0.364147	0.397929	0.413016	0.426477	0.424468	0.412476	0.392749	0.35511	0.31747	0.303783	0.290207	0.300582	0.322562	0.339142	0.346261	0.353625	0.365196	0.376767	0.389683	0.403073	0.41811	0.435304	0.455955	0.503632	0.551309	0.620952	0.696197	0.790968	0.905963	1.00987	1.05851	1.10716	1.12748	1.1433	1.15116	1.15251	1.16388	1.20654	1.2492
0.543102	0.494453	0.440644	0.373415	0.312816	0.26014	0.214589	0.17419	0.154981	0.134964	0.114057	0.0992387	0.0873125	0.0850555	0.0861375	0.0908983	0.0906547	0.0805212	0.0713402	0.0626586	0.0543281	0.0518636	0.0609882	0.0654943	0.0673571	0.0679194	0.0683852	0.0687634	0.0693104	0.0699626	0.0709748	0.0755442	0.0885264	0.101964	0.115711	0.142575	0.184284	0.262554	0.372505	0.50219	0.652143	0.824388	0.942319	1.0315	1.0312	1.01384	0.979164	0.933119	0.8877	0.859454
0.0731202	0.0748671	0.0813733	0.0850726	0.0835956	0.0834221	0.0838649	0.0825175	0.0811135	0.0796051	0.0742003	0.0671592	0.0632682	0.0634212	0.0710382	0.0791787	0.0874455	0.0924594	0.0936202	0.0876819	0.0798327	0.0711409	0.0699845	0.0707156	0.0749244	0.0844967	0.0964028	0.103643	0.115712	0.137497	0.164305	0.193565	0.222824	0.256458	0.283599	0.284639	0.265584	0.228852	0.262771	0.328164	0.471908	0.635697	0.815754	0.924468	1.00242	0.998218	0.976687	0.941078	0.913769	0.901933
0.246349	0.222135	0.211417	0.202831	0.184021	0.162422	0.14924	0.139469	0.125494	0.109127	0.0973666	0.0891504	0.0900336	0.100518	0.136127	0.207684	0.312114	0.480696	0.632225	0.733403	0.819255	0.834809	0.850363	0.862431	0.746949	0.631466	0.507843	0.383816	0.267098	0.151408	0.0798874	0.0191066	-0.0107963	-0.0293017	-0.0314572	-0.0250465	0.0107145	0.0677291	0.147576	0.249696	0.367453	0.506263	0.631422	0.731674	0.818135	0.868779	0.914029	0.937651	0.958936	0.96427
0.0969789	0.137414	0.17573	0.214326	0.264626	0.314927	0.330416	0.343974	0.343591	0.341187	0.32936	0.315159	0.301707	0.288544	0.292376	0.3054	0.3156	0.323726	0.32247	0.311479	0.290582	0.255824	0.227135	0.21022	0.211136	0.262122	0.309901	0.344025	0.373045	0.362558	0.351029	0.313417	0.275804	0.261011	0.247011	0.31889	0.401146	0.501333	0.605462	0.690428	0.768871	0.818328	0.853248	0.875908	0.890159	0.916674	0.95461	0.971513	0.961973	0.936841
0.03355	0.0334093	0.0313042	0.0282071	0.0175695	0.00990538	0.00755049	0.00523567	0.00308339	0.00449145	0.0036228	-0.000973115	0.00125822	0.00691222	0.024467	0.0494178	0.0864976	0.111129	0.129992	0.134482	0.133571	0.124532	0.118185	0.112215	0.0996129	0.0870104	0.0754874	0.0645488	0.0553617	0.0529051	0.0561912	0.0601532	0.064916	0.0722023	0.0825973	0.0954388	0.128716	0.178911	0.275561	0.385871	0.506089	0.604368	0.684498	0.718335	0.749469	0.778642	0.862381	0.936558	0.969889	0.999027
0.754475	0.606782	0.512088	0.417808	0.376147	0.334486	0.31227	0.291438	0.293979	0.300408	0.313384	0.328196	0.35486	0.38638	0.400686	0.405021	0.414103	0.426903	0.433248	0.432804	0.438255	0.452078	0.462582	0.466665	0.473644	0.488824	0.502824	0.511685	0.521166	0.535618	0.549372	0.543554	0.537736	0.54418	0.551132	0.525518	0.495812	0.5096	0.533195	0.614321	0.716489	0.857297	1.01835	1.14361	1.24313	1.28439	1.26822	1.22543	1.14703	1.06943
0.32629	0.321574	0.322917	0.329558	0.354787	0.380017	0.429638	0.482102	0.546028	0.618006	0.684993	0.739106	0.793219	0.808305	0.822489	0.802897	0.766774	0.718753	0.649705	0.580996	0.518561	0.456127	0.39852	0.342686	0.299634	0.275172	0.251122	0.230901	0.210681	0.201799	0.195925	0.192183	0.190707	0.190208	0.19475	0.199291	0.211573	0.225278	0.262208	0.319212	0.378325	0.444476	0.510626	0.57977	0.649238	0.705134	0.751291	0.798735	0.84995	0.901165
0.724953	0.721757	0.755243	0.801968	0.850362	0.899707	0.93157	0.94906	0.943124	0.909755	0.872034	0.827414	0.786076	0.752555	0.721656	0.701615	0.679968	0.645611	0.611735	0.600952	0.590168	0.583886	0.577869	0.575356	0.573358	0.571359	0.581209	0.598199	0.623766	0.656712	0.713174	0.797044	0.857537	0.879199	0.89621	0.902553	0.901248	0.87338	0.852369	0.872311	0.890461	0.884563	0.878666	0.899824	0.921168	0.933635	0.945084	0.96856	0.994583	1.0132
0.458868	0.354062	0.288304	0.224801	0.174457	0.130773	0.118024	0.11003	0.10901	0.109187	0.109185	0.100809	0.0905075	0.0773859	0.0645563	0.0531717	0.0561563	0.0593329	0.0627687	0.0635492	0.0631545	0.0599035	0.0589678	0.0614252	0.0669456	0.073496	0.0782172	0.0829385	0.0830303	0.0833659	0.0859359	0.0867038	0.0861985	0.0882671	0.0890285	0.0851455	0.0841252	0.0851304	0.0903614	0.0982107	0.113047	0.137098	0.167658	0.220449	0.296845	0.433537	0.575089	0.7198	0.870737	0.987054
0.773424	0.74164	0.720599	0.698846	0.676111	0.645564	0.600328	0.557112	0.519372	0.483955	0.45835	0.432298	0.402809	0.374032	0.361276	0.34852	0.328966	0.309211	0.324174	0.343375	0.348094	0.349607	0.366407	0.388446	0.387896	0.376161	0.353396	0.323166	0.297102	0.274843	0.28181	0.324412	0.389432	0.491246	0.591285	0.687305	0.773961	0.829996	0.879676	0.894918	0.904281	0.84952	0.79453	0.711084	0.627638	0.601702	0.580095	0.558487	0.596368	0.650331
0.0428869	0.0424818	0.0372427	0.0350184	0.0385942	0.0424205	0.0463294	0.0487258	0.0490411	0.0456918	0.0462369	0.0483497	0.0467662	0.0464991	0.048548	0.0504614	0.0525573	0.065217	0.0752363	0.0806102	0.0801768	0.0770181	0.0656033	0.0579771	0.0576205	0.0585535	0.0688204	0.0765169	0.0809711	0.0913845	0.103774	0.118454	0.140531	0.171214	0.201201	0.231265	0.263694	0.31014	0.374238	0.428964	0.48308	0.551412	0.609279	0.654979	0.733605	0.819845	0.894953	0.954952	0.995941	1.02721
0.170719	0.151567	0.136981	0.12269	0.120941	0.119191	0.118306	0.117764	0.120366	0.12782	0.135363	0.14409	0.152818	0.157802	0.161621	0.168415	0.178717	0.189432	0.202478	0.215523	0.221332	0.225636	0.22794	0.228328	0.230488	0.239556	0.248625	0.271183	0.295371	0.328714	0.368475	0.41736	0.492512	0.567664	0.667233	0.768311	0.849701	0.919812	0.970136	0.980175	0.989464	0.967691	0.945917	0.931072	0.919189	0.909723	0.903984	0.896879	0.86445	0.832022
0.028245	0.0327888	0.0375154	0.040851	0.0404783	0.039231	0.0374354	0.0292945	0.0222284	0.0187911	0.0182612	0.0195545	0.0270994	0.034656	0.0414613	0.0434907	0.0425304	0.0382399	0.0342634	0.0314161	0.0313478	0.0328768	0.035788	0.0377528	0.0373004	0.0369431	0.0428364	0.0490609	0.0558866	0.0642078	0.0730681	0.0743004	0.0749291	0.0743603	0.0740012	0.0737858	0.0763553	0.08218	0.093914	0.104928	0.115703	0.131285	0.144681	0.154109	0.170158	0.189285	0.20179	0.214528	0.227689	0.250198
0.0656408	0.0790717	0.117647	0.172342	0.261215	0.338063	0.408425	0.45063	0.473235	0.424441	0.364505	0.28737	0.227618	0.179996	0.146874	0.121581	0.114559	0.107646	0.100802	0.100404	0.099243	0.0938673	0.0902164	0.087764	0.0837417	0.0792195	0.0736636	0.070498	0.0691357	0.0682847	0.0674968	0.0675075	0.0676662	0.0644268	0.0629641	0.0642783	0.0738467	0.0884074	0.128774	0.208091	0.348279	0.557975	0.786968	0.930958	1.015	1.00535	0.908283	0.78272	0.71059	0.64945
0.0707884	0.0804819	0.0889775	0.0961437	0.10529	0.116333	0.125835	0.135024	0.143652	0.149557	0.155363	0.161072	0.167911	0.174028	0.175684	0.167717	0.149756	0.128219	0.107416	0.0936949	0.0869752	0.0875137	0.0889641	0.0939148	0.114914	0.135668	0.156183	0.177566	0.196601	0.203533	0.210165	0.21651	0.221152	0.222026	0.220604	0.217839	0.222062	0.235239	0.269339	0.378404	0.531232	0.741087	0.921114	1.0215	1.01552	0.941954	0.786856	0.638643	0.525036	0.433995
0.85198	0.764158	0.667725	0.566312	0.482385	0.406005	0.344995	0.277937	0.207425	0.152418	0.104151	0.0696347	0.0466734	0.0303085	0.0230371	0.0172228	0.0140872	0.0101788	0.00586578	0.00338629	0.00122021	-0.000218127	-0.00160544	-0.00271796	-0.00256136	-0.00111825	-0.00265473	-0.0041934	-0.00152904	0.000840052	0.00288515	0.00753229	0.0122304	0.0140594	0.0205374	0.0321126	0.0552061	0.0852405	0.140451	0.203876	0.2763	0.337258	0.400892	0.499735	0.573376	0.619405	0.66394	0.704579	0.689563	0.636977
0.995941	1.02721	1.03123	1.01432	0.983638	0.930438	0.874355	0.814003	0.757315	0.703245	0.668151	0.633609	0.596164	0.568994	0.548663	0.511106	0.469014	0.417272	0.372399	0.332439	0.309505	0.294614	0.299093	0.290591	0.272819	0.251226	0.223486	0.199844	0.178367	0.175116	0.169027	0.157966	0.136289	0.109787	0.0871801	0.0677097	0.0537339	0.0452494	0.0393034	0.0330318	0.031227	0.0372471	0.0479172	0.0612615	0.0902548	0.126065	0.173807	0.236998	0.306699	0.377131
0.0319404	0.0279708	0.0214174	0.0170952	0.017669	0.020202	0.0238426	0.0235074	0.0243899	0.0280609	0.0310462	0.0336763	0.0488463	0.064435	0.0803384	0.0964081	0.112572	0.125172	0.13578	0.142076	0.16076	0.186448	0.215688	0.238423	0.247119	0.252696	0.229823	0.200306	0.16229	0.133854	0.109554	0.0957767	0.0830891	0.0716846	0.0684979	0.0688556	0.0802518	0.101944	0.13789	0.179527	0.225089	0.289924	0.378668	0.497914	0.642783	0.791494	0.890511	0.950086	0.955058	0.942867
0.0450391	0.0510129	0.062844	0.0746751	0.0909461	0.113755	0.163592	0.210187	0.253686	0.257269	0.248218	0.21171	0.176715	0.143158	0.143787	0.151127	0.161898	0.182495	0.212493	0.280125	0.365791	0.501541	0.636476	0.770639	0.825906	0.84787	0.775762	0.703655	0.553085	0.406498	0.280756	0.194878	0.134144	0.0979815	0.067374	0.047964	0.0475427	0.0601433	0.139691	0.236856	0.368136	0.497486	0.625514	0.729892	0.8289	0.918113	0.964909	0.984995	0.969254	0.950745
0.0152636	0.0235647	0.0313957	0.0389819	0.0454014	0.0518209	0.0629011	0.0747807	0.08313	0.0885603	0.0948232	0.104311	0.113799	0.122266	0.130617	0.138815	0.146907	0.158785	0.18038	0.201976	0.213598	0.224943	0.241521	0.260713	0.283458	0.312557	0.342484	0.393374	0.444264	0.493515	0.542118	0.582634	0.611232	0.635504	0.620223	0.604943	0.577404	0.546685	0.508045	0.460623	0.415792	0.384135	0.352477	0.337943	0.32629	0.321574	0.322917	0.329558	0.354787	0.380017
0	0	0	0	0	0	0	0	0	0	0	0	0	0	0	0	0	0	0	0	0	0	0	NaN	0.0622871	0.0546881	0.0490466	0.0465346	0.0473972	0.0491771	0.0483446	0.0455894	0.0404322	0.035275	0.0322904	0.0316008	0.0360694	0.0458121	0.0584602	0.0641187	0.0679435	0.0678319	0.0711197	0.0762799	0.0878285	0.0994744	0.114392	0.131275	0.137745	0.152207
0.333005	0.272528	0.216524	0.165296	0.1274	0.0975734	0.0734864	0.0615531	0.0513692	0.0426052	0.0365838	0.0325129	0.0298335	0.0325831	0.0501195	0.0707425	0.093386	0.115611	0.132352	0.135359	0.139222	0.1436	0.144223	0.140156	0.132484	0.122851	0.104881	0.0889378	0.0755235	0.073278	0.0743307	0.0770414	0.0807336	0.0855559	0.0855654	0.0920514	0.143701	0.244715	0.39819	0.593542	0.786485	0.922278	0.998948	1.0164	0.976164	0.925345	0.854046	0.768206	0.702791	0.642375
0.319561	0.31463	0.311927	0.311352	0.304604	0.3133	0.401739	0.515602	0.653875	0.729222	0.773811	0.734889	0.668017	0.574482	0.519799	0.470625	0.416136	0.363329	0.312001	0.254186	0.198171	0.154494	0.112696	0.0725521	0.0570187	0.0450978	0.0378294	0.0332722	0.0314013	0.0298839	0.0289756	0.0313827	0.0357203	0.0580531	0.0757986	0.0802213	0.0780562	0.0717145	0.0752028	0.0811145	0.0916946	0.110778	0.135252	0.155528	0.18872	0.25368	0.349505	0.463303	0.560041	0.656295
0.234639	0.226832	0.224919	0.224174	0.224057	0.224063	0.224159	0.237586	0.264965	0.295152	0.329378	0.358403	0.377065	0.390601	0.389564	0.396613	0.440104	0.487513	0.567412	0.645697	0.671777	0.697856	0.635432	0.568916	0.482568	0.393465	0.338547	0.2919	0.285527	0.294111	0.309325	0.32799	0.349693	0.373548	0.400304	0.429972	0.475241	0.541583	0.626387	0.745629	0.851665	0.922566	0.984518	1.01085	1.02986	0.997604	0.964973	0.925511	0.88605	0.829894
0.0238551	0.0197899	0.0143757	0.00847344	0.00180432	-0.00424284	-0.00255224	-0.000861648	0.00356848	0.00882339	0.010328	0.00736937	0.00490705	0.00520498	0.00550291	0.00883193	0.0127187	0.0227532	0.0380586	0.0539758	0.0721921	0.0904084	0.103865	0.116817	0.128669	0.139793	0.152257	0.167874	0.183492	0.198588	0.21368	0.232585	0.253287	0.280257	0.317649	0.35504	0.414666	0.481639	0.563055	0.663663	0.758337	0.810061	0.861785	0.887412	0.907116	0.891331	0.841036	0.788936	0.729488	0.67004
0.0825825	0.0552176	0.0355516	0.0196493	0.0173022	0.0159434	0.0157571	0.0146678	0.0137439	0.0159974	0.0220158	0.0324966	0.0441291	0.0554057	0.061831	0.0628184	0.0573653	0.0538034	0.0508977	0.0490956	0.053264	0.0645035	0.074645	0.084508	0.0952155	0.106402	0.105949	0.10502	0.103636	0.0995418	0.094039	0.0932083	0.091885	0.0895765	0.0906173	0.0936279	0.117089	0.18085	0.323542	0.500953	0.69641	0.85863	0.976678	1.00833	0.968579	0.894981	0.788994	0.684912	0.584677	0.522733
0.779756	0.835501	0.808475	0.73291	0.645368	0.540243	0.440429	0.346059	0.265701	0.195158	0.15797	0.120781	0.0838205	0.04697	0.037422	0.0300858	0.0272534	0.0216909	0.0146905	0.0082127	0.00361876	0.0031233	0.00671455	0.0124583	0.0202504	0.0267566	0.0300643	0.0328294	0.035283	0.0343472	0.034437	0.0369471	0.0398342	0.0429379	0.0479997	0.0531112	0.0657404	0.0823326	0.155403	0.248586	0.384833	0.537527	0.698869	0.790995	0.848091	0.836227	0.771007	0.68012	0.574855	0.481268
0.256992	0.245886	0.23625	0.240421	0.249698	0.246408	0.236541	0.22801	0.220436	0.208969	0.193517	0.189524	0.201472	0.214467	0.229445	0.241161	0.243853	0.245668	0.243589	0.242161	0.245906	0.25083	0.286128	0.321425	0.332895	0.34331	0.350653	0.35759	0.345039	0.327706	0.322072	0.320735	0.327052	0.337611	0.35332	0.3729	0.418473	0.493241	0.590873	0.724384	0.846439	0.943788	1.02546	1.05608	1.07812	1.05318	1.02716	0.988075	0.948987	0.875744
0.492344	0.508562	0.523882	0.509894	0.492541	0.51688	0.550088	0.572703	0.591752	0.602275	0.608461	0.614647	0.598762	0.570802	0.569784	0.589593	0.651228	0.758501	0.872466	0.996387	1.09314	1.13321	1.13819	1.02945	0.913443	0.759832	0.61109	0.515724	0.420774	0.378818	0.336861	0.314488	0.293507	0.296067	0.302541	0.315609	0.330526	0.35738	0.389123	0.403531	0.407897	0.417043	0.429934	0.436324	0.435877	0.441366	0.455288	0.465866	0.469978	0.477007
0.0286994	0.0312805	0.0333423	0.0300131	0.0273412	0.025487	0.0228607	0.0210701	0.0265799	0.0337574	0.0430115	0.0519063	0.0597862	0.0599005	0.0590691	0.0569624	0.0519165	0.0467213	0.0479239	0.0483725	0.0478831	0.0568744	0.0684928	0.0778096	0.0861954	0.0934249	0.103236	0.114576	0.13287	0.157379	0.19029	0.220995	0.248416	0.247833	0.240106	0.22272	0.200854	0.179736	0.176474	0.224697	0.336871	0.430312	0.51803	0.618204	0.780956	0.88733	0.938708	0.961222	0.965304	0.9116
0.0304061	0.0256086	0.0183775	0.0111918	0.00827382	0.00614541	0.00488828	0.0108248	0.0180069	0.0231143	0.0275028	0.0311589	0.0329208	0.0332061	0.0283133	0.0269592	0.0289295	0.0281972	0.0279817	0.0317594	0.0355372	0.0375163	0.0391925	0.0406926	0.0421794	0.0436546	0.0478505	0.0537018	0.0647664	0.0769353	0.0900603	0.0942519	0.0968879	0.0983304	0.0949824	0.0874908	0.123531	0.19249	0.358605	0.552877	0.771503	0.904318	0.996095	0.978789	0.961483	0.878221	0.793283	0.711512	0.621723	0.527296
0.676716	0.743627	0.802963	0.857245	0.894334	0.914667	0.936774	0.961249	0.978867	0.98408	0.978445	0.944638	0.908604	0.862429	0.813253	0.739245	0.665605	0.61522	0.564835	0.51445	0.426092	0.334683	0.270841	0.211735	0.169359	0.132104	0.118585	0.116389	0.118129	0.122457	0.127728	0.133852	0.144532	0.16089	0.192652	0.253174	0.338421	0.488854	0.633906	0.754544	0.871319	0.953548	1.03329	1.02199	1.01069	1.00074	0.990847	0.945536	0.89533	0.829872
0.0229029	0.0175365	0.0134799	0.0096778	0.00797634	0.00828031	0.00668771	-0.00240658	-0.0115009	-0.0136203	-0.0149248	-0.0128503	-0.00827811	-0.00189806	0.0102258	0.0223496	0.0306635	0.0387055	0.0464374	0.0539867	0.0598841	0.0622872	0.064734	0.0704459	0.0761577	0.0889357	0.105027	0.124172	0.148363	0.173632	0.213538	0.253444	0.288182	0.321274	0.347286	0.364739	0.378767	0.372467	0.366167	0.338961	0.307054	0.27855	0.253338	0.229854	0.213183	0.196512	0.203297	0.212917	0.22611	0.241981
0.153184	0.173006	0.189248	0.204193	0.211016	0.21358	0.215509	0.216981	0.220792	0.22685	0.235127	0.246445	0.255741	0.260682	0.263133	0.257044	0.249143	0.230587	0.212949	0.207265	0.201581	0.197988	0.194413	0.19778	0.201804	0.227714	0.258151	0.32123	0.395706	0.434564	0.454975	0.475385	0.488436	0.490493	0.475963	0.427544	0.401943	0.445232	0.502275	0.631089	0.760309	0.894058	1.02764	1.09041	1.15318	1.07476	0.984128	0.862505	0.735155	0.614
0.560041	0.656295	0.756832	0.854899	0.901279	0.913566	0.877278	0.799646	0.705393	0.572494	0.450514	0.344079	0.256453	0.178915	0.139634	0.105812	0.0791501	0.064492	0.0535012	0.0397811	0.0343132	0.0396692	0.0450391	0.0510129	0.062844	0.0746751	0.0909461	0.113755	0.163592	0.210187	0.253686	0.257269	0.248218	0.21171	0.176715	0.143158	0.143787	0.151127	0.161898	0.182495	0.212493	0.280125	0.365791	0.501541	0.636476	0.770639	0.825906	0.84787	0.775762	0.703655
0.197636	0.145705	0.1102	0.0826715	0.0704413	0.0607522	0.055926	0.0496401	0.0426142	0.0360431	0.0296085	0.0234696	0.0202544	0.0186566	0.0150842	0.0144264	0.0205296	0.0249053	0.028239	0.0341187	0.0377684	0.036081	0.0387549	0.0438439	0.0554097	0.0662213	0.0750572	0.0805571	0.0842111	0.0818449	0.0804169	0.0816572	0.081146	0.0796665	0.0750448	0.0716071	0.0711489	0.0751931	0.0817261	0.101596	0.128891	0.172039	0.229973	0.296073	0.357904	0.40471	0.42034	0.422652	0.383785	0.332358
0.206522	0.238772	0.259328	0.277384	0.296859	0.316996	0.337825	0.352913	0.36682	0.367629	0.361371	0.355336	0.351458	0.351961	0.354501	0.357712	0.327282	0.291637	0.246281	0.200825	0.155486	0.126606	0.0998562	0.0770671	0.0542972	0.0318191	0.0186273	0.0094082	0.00757349	0.00929517	0.0127006	0.0188574	0.0250141	0.0299459	0.0349515	0.0418034	0.0534051	0.0699465	0.0902788	0.114754	0.15567	0.217963	0.300943	0.374108	0.439933	0.472169	0.476771	0.450236	0.435751	0.424279
0.2919	0.285527	0.294111	0.309325	0.32799	0.349693	0.373548	0.400304	0.429972	0.475241	0.541583	0.626387	0.745629	0.851665	0.922566	0.984518	1.01085	1.02986	0.997604	0.964973	0.925511	0.88605	0.829894	0.773376	0.695535	0.615399	0.563897	0.518244	0.528611	0.557217	0.60694	0.666951	0.720169	0.768854	0.80212	0.820355	0.840183	0.862135	0.877936	0.882611	0.877557	0.847236	0.814918	0.773504	0.729399	0.663021	0.596975	0.551785	0.506595	0.461405
0.711107	0.757245	0.806096	0.845785	0.883933	0.889991	0.886355	0.87666	0.864291	0.844971	0.821345	0.809812	0.808506	0.808544	0.810112	0.824988	0.860541	0.887998	0.898173	0.901826	0.88564	0.86452	0.819144	0.772683	0.715669	0.658095	0.571623	0.485152	0.399448	0.313792	0.257348	0.205324	0.195793	0.197221	0.251914	0.327259	0.474378	0.661382	0.841244	1.01573	1.13418	1.19579	1.18749	1.08281	0.971145	0.846429	0.725471	0.614991	0.513477	0.450637
0.233758	0.243112	0.252827	0.266518	0.284902	0.299235	0.307141	0.318523	0.337484	0.355363	0.36955	0.383274	0.394417	0.405232	0.41206	0.418888	0.430549	0.442239	0.457596	0.473289	0.472893	0.469519	0.470285	0.472303	0.475053	0.478127	0.478876	0.47821	0.469507	0.454198	0.436224	0.415333	0.394887	0.375099	0.36003	0.354579	0.348904	0.342574	0.342069	0.367918	0.390976	0.390592	0.38986	0.377306	0.364752	0.333378	0.301029	0.281596	0.263978	0.25257
0.280853	0.266477	0.254512	0.247459	0.238851	0.224913	0.204456	0.179271	0.136193	0.0933859	0.0558079	0.0352451	0.0260353	0.0181803	0.0123591	0.0110556	0.0116863	0.0151148	0.0206016	0.0291732	0.0388404	0.0484913	0.0512055	0.0559778	0.0638346	0.0718643	0.0807524	0.10853	0.135069	0.159586	0.181462	0.200605	0.193002	0.182468	0.167149	0.157927	0.151315	0.159488	0.17751	0.235035	0.297484	0.364194	0.394217	0.399762	0.371546	0.336568	0.289468	0.282034	0.303276	0.332855
0.478694	0.483359	0.456458	0.441773	0.430142	0.419581	0.392942	0.349583	0.291653	0.229997	0.166552	0.119123	0.0883382	0.0698112	0.0548212	0.0467237	0.0403183	0.0359777	0.0331096	0.0306452	0.0282693	0.0266692	0.0259425	0.0280881	0.0322132	0.0437228	0.0565635	0.0707884	0.0804819	0.0889775	0.0961437	0.10529	0.116333	0.125835	0.135024	0.143652	0.149557	0.155363	0.161072	0.167911	0.174028	0.175684	0.167717	0.149756	0.128219	0.107416	0.0936949	0.0869752	0.0875137	0.0889641
0.846439	0.943788	1.02546	1.05608	1.07812	1.05318	1.02716	0.988075	0.948987	0.875744	0.802106	0.688556	0.571165	0.459417	0.348781	0.281373	0.227947	0.190418	0.160399	0.14805	0.1472	0.161746	0.190054	0.22478	0.267413	0.305795	0.337124	0.370871	0.410667	0.459913	0.545623	0.625331	0.666114	0.706898	0.747681	0.771864	0.793903	0.757423	0.707127	0.693824	0.693831	0.714422	0.745653	0.782624	0.823697	0.83721	0.823053	0.774928	0.68047	0.576634
0.238754	0.253116	0.275158	0.305693	0.361759	0.428659	0.547426	0.656259	0.674893	0.69211	0.658615	0.625121	0.521487	0.414254	0.34842	0.2885	0.257965	0.234639	0.226832	0.224919	0.224174	0.224057	0.224063	0.224159	0.237586	0.264965	0.295152	0.329378	0.358403	0.377065	0.390601	0.389564	0.396613	0.440104	0.487513	0.567412	0.645697	0.671777	0.697856	0.635432	0.568916	0.482568	0.393465	0.338547	0.2919	0.285527	0.294111	0.309325	0.32799	0.349693
0.24359	0.222616	0.195715	0.164792	0.122971	0.0920479	0.0688547	0.0562893	0.0445831	0.0352673	0.0275968	0.0268536	0.0271684	0.0286994	0.0312805	0.0333423	0.0300131	0.0273412	0.025487	0.0228607	0.0210701	0.0265799	0.0337574	0.0430115	0.0519063	0.0597862	0.0599005	0.0590691	0.0569624	0.0519165	0.0467213	0.0479239	0.0483725	0.0478831	0.0568744	0.0684928	0.0778096	0.0861954	0.0934249	0.103236	0.114576	0.13287	0.157379	0.19029	0.220995	0.248416	0.247833	0.240106	0.22272	0.200854
0.153821	0.158934	0.161111	0.155315	0.149134	0.142707	0.144251	0.146228	0.148207	0.149442	0.150236	0.150629	0.149442	0.144395	0.138291	0.131564	0.121872	0.115897	0.118457	0.123752	0.130528	0.127236	0.12191	0.11276	0.103525	0.0942421	0.0923726	0.0899768	0.0858685	0.0798648	0.0728352	0.062053	0.052134	0.0440601	0.0360552	0.0280877	0.0338991	0.0573262	0.1164	0.203438	0.3056	0.393189	0.448679	0.439026	0.395608	0.335484	0.275267	0.225331	0.196351	0.175312
0.418781	0.320831	0.236595	0.167924	0.115994	0.0757794	0.0525654	0.0375696	0.0392595	0.0415857	0.0458639	0.0563197	0.0969789	0.137414	0.17573	0.214326	0.264626	0.314927	0.330416	0.343974	0.343591	0.341187	0.32936	0.315159	0.301707	0.288544	0.292376	0.3054	0.3156	0.323726	0.32247	0.311479	0.290582	0.255824	0.227135	0.21022	0.211136	0.262122	0.309901	0.344025	0.373045	0.362558	0.351029	0.313417	0.275804	0.261011	0.247011	0.31889	0.401146	0.501333
0.0403183	0.0359777	0.0331096	0.0306452	0.0282693	0.0266692	0.0259425	0.0280881	0.0322132	0.0437228	0.0565635	0.0707884	0.0804819	0.0889775	0.0961437	0.10529	0.116333	0.125835	0.135024	0.143652	0.149557	0.155363	0.161072	0.167911	0.174028	0.175684	0.167717	0.149756	0.128219	0.107416	0.0936949	0.0869752	0.0875137	0.0889641	0.0939148	0.114914	0.135668	0.156183	0.177566	0.196601	0.203533	0.210165	0.21651	0.221152	0.222026	0.220604	0.217839	0.222062	0.235239	0.269339
0	0	0	0	0	0	0	0	0	0	0	0	0	0	0	NaN	0.211969	0.299398	0.38511	0.423209	0.461309	0.476504	0.490859	0.477752	0.461493	0.484298	0.515413	0.536601	0.554449	0.56431	0.570106	0.575902	0.561018	0.534821	0.533867	0.552427	0.610177	0.710687	0.817469	0.933578	1.02423	1.06177	1.06644	0.964556	0.855863	0.711934	0.572569	0.483214	0.39425	0.354938
0.131564	0.121872	0.115897	0.118457	0.123752	0.130528	0.127236	0.12191	0.11276	0.103525	0.0942421	0.0923726	0.0899768	0.0858685	0.0798648	0.0728352	0.062053	0.052134	0.0440601	0.0360552	0.0280877	0.0338991	0.0573262	0.1164	0.203438	0.3056	0.393189	0.448679	0.439026	0.395608	0.335484	0.275267	0.225331	0.196351	0.175312	0.158332	0.155902	0.160548	0.179614	0.199029	0.21837	0.211606	0.197241	0.168725	0.143678	0.120421	0.104913	0.0893584	0.0737159	0.0620817
0.0573262	0.1164	0.203438	0.3056	0.393189	0.448679	0.439026	0.395608	0.335484	0.275267	0.225331	0.196351	0.175312	0.158332	0.155902	0.160548	0.179614	0.199029	0.21837	0.211606	0.197241	0.168725	0.143678	0.120421	0.104913	0.0893584	0.0737159	0.0620817	0.0523075	0.0483694	0.047924	0.0545828	0.0656408	0.0790717	0.117647	0.172342	0.261215	0.338063	0.408425	0.45063	0.473235	0.424441	0.364505	0.28737	0.227618	0.179996	0.146874	0.121581	0.114559	0.107646
0.0752028	0.0811145	0.0916946	0.110778	0.135252	0.155528	0.18872	0.25368	0.349505	0.463303	0.560041	0.656295	0.756832	0.854899	0.901279	0.913566	0.877278	0.799646	0.705393	0.572494	0.450514	0.344079	0.256453	0.178915	0.139634	0.105812	0.0791501	0.064492	0.0535012	0.0397811	0.0343132	0.0396692	0.0450391	0.0510129	0.062844	0.0746751	0.0909461	0.113755	0.163592	0.210187	0.253686	0.257269	0.248218	0.21171	0.176715	0.143158	0.143787	0.151127	0.161898	0.182495
0.0813039	0.0798215	0.0751908	0.0717464	0.0712873	0.0753394	0.0818851	0.101794	0.129142	0.172373	0.23042	0.29665	0.3586	0.405498	0.421158	0.423474	0.384532	0.333005	0.272528	0.216524	0.165296	0.1274	0.0975734	0.0734864	0.0615531	0.0513692	0.0426052	0.0365838	0.0325129	0.0298335	0.0325831	0.0501195	0.0707425	0.093386	0.115611	0.132352	0.135359	0.139222	0.1436	0.144223	0.140156	0.132484	0.122851	0.104881	0.0889378	0.0755235	0.073278	0.0743307	0.0770414	0.0807336
0.570332	0.60263	0.666878	0.71354	0.74839	0.740189	0.71559	0.652067	0.578702	0.498723	0.417485	0.334982	0.249073	0.17668	0.113358	0.0789111	0.051923	0.0409172	0.0358273	0.035046	0.0444667	0.0591637	0.0864023	0.101041	0.107232	0.0950576	0.0793088	0.0573597	0.0354105	0.0197239	0.0078984	0.0110246	0.0196599	0.040901	0.0569989	0.0699257	0.0889556	0.104154	0.108751	0.115677	0.124039	0.11684	0.107649	0.0953431	0.0805097	0.0642261	0.0480718	0.0353576	0.0306957	0.0308119
0.767371	0.722503	0.634434	0.537623	0.424603	0.324896	0.259627	0.1994	0.15877	0.122649	0.116023	0.109436	0.103473	0.0975094	0.111462	0.125644	0.142006	0.158578	0.177952	0.197859	0.221154	0.245471	0.250513	0.247135	0.244288	0.241764	0.234469	0.223234	0.218804	0.221938	0.228062	0.238754	0.253116	0.275158	0.305693	0.361759	0.428659	0.547426	0.656259	0.674893	0.69211	0.658615	0.625121	0.521487	0.414254	0.34842	0.2885	0.257965	0.234639	0.226832
Time relative to onset of a reversal (s)
-20	-19.5	-19	-18.5	-18	-17.5	-17	-16.5	-16	-15.5	-15	-14.5	-14	-13.5	-13	-12.5	-12	-11.5	-11	-10.5	-10	-9.5	-9	-8.5	-8	-7.5	-7	-6.5	-6	-5.5	-5	-4.5	-4	-3.5	-3	-2.5	-2	-1.5	-1	-0.5	0	0.5	1	1.5	2	2.5	3	3.5	4	4.5
Calcium activity in AIY (dR/R0)
0.0445831	0.0352673	0.0275968	0.0268536	0.0271684	0.0286994	0.0312805	0.0333423	0.0300131	0.0273412	0.025487	0.0228607	0.0210701	0.0265799	0.0337574	0.0430115	0.0519063	0.0597862	0.0599005	0.0590691	0.0569624	0.0519165	0.0467213	0.0479239	0.0483725	0.0478831	0.0568744	0.0684928	0.0778096	0.0861954	0.0934249	0.103236	0.114576	0.13287	0.157379	0.19029	0.220995	0.248416	0.247833	0.240106	0.22272	0.200854	0.179736	0.176474	0.224697	0.336871	0.430312	0.51803	0.618204	0.780956
0.155528	0.18872	0.25368	0.349505	0.463303	0.560041	0.656295	0.756832	0.854899	0.901279	0.913566	0.877278	0.799646	0.705393	0.572494	0.450514	0.344079	0.256453	0.178915	0.139634	0.105812	0.0791501	0.064492	0.0535012	0.0397811	0.0343132	0.0396692	0.0450391	0.0510129	0.062844	0.0746751	0.0909461	0.113755	0.163592	0.210187	0.253686	0.257269	0.248218	0.21171	0.176715	0.143158	0.143787	0.151127	0.161898	0.182495	0.212493	0.280125	0.365791	0.501541	0.636476
0.148207	0.149442	0.150236	0.150629	0.149442	0.144395	0.138291	0.131564	0.121872	0.115897	0.118457	0.123752	0.130528	0.127236	0.12191	0.11276	0.103525	0.0942421	0.0923726	0.0899768	0.0858685	0.0798648	0.0728352	0.062053	0.052134	0.0440601	0.0360552	0.0280877	0.0338991	0.0573262	0.1164	0.203438	0.3056	0.393189	0.448679	0.439026	0.395608	0.335484	0.275267	0.225331	0.196351	0.175312	0.158332	0.155902	0.160548	0.179614	0.199029	0.21837	0.211606	0.197241
0.166552	0.119123	0.0883382	0.0698112	0.0548212	0.0467237	0.0403183	0.0359777	0.0331096	0.0306452	0.0282693	0.0266692	0.0259425	0.0280881	0.0322132	0.0437228	0.0565635	0.0707884	0.0804819	0.0889775	0.0961437	0.10529	0.116333	0.125835	0.135024	0.143652	0.149557	0.155363	0.161072	0.167911	0.174028	0.175684	0.167717	0.149756	0.128219	0.107416	0.0936949	0.0869752	0.0875137	0.0889641	0.0939148	0.114914	0.135668	0.156183	0.177566	0.196601	0.203533	0.210165	0.21651	0.221152
0.428964	0.48308	0.551412	0.609279	0.654979	0.733605	0.819845	0.894953	0.954952	0.995941	1.02721	1.03123	1.01432	0.983638	0.930438	0.874355	0.814003	0.757315	0.703245	0.668151	0.633609	0.596164	0.568994	0.548663	0.511106	0.469014	0.417272	0.372399	0.332439	0.309505	0.294614	0.299093	0.290591	0.272819	0.251226	0.223486	0.199844	0.178367	0.175116	0.169027	0.157966	0.136289	0.109787	0.0871801	0.0677097	0.0537339	0.0452494	0.0393034	0.0330318	0.031227
0.139634	0.105812	0.0791501	0.064492	0.0535012	0.0397811	0.0343132	0.0396692	0.0450391	0.0510129	0.062844	0.0746751	0.0909461	0.113755	0.163592	0.210187	0.253686	0.257269	0.248218	0.21171	0.176715	0.143158	0.143787	0.151127	0.161898	0.182495	0.212493	0.280125	0.365791	0.501541	0.636476	0.770639	0.825906	0.84787	0.775762	0.703655	0.553085	0.406498	0.280756	0.194878	0.134144	0.0979815	0.067374	0.047964	0.0475427	0.0601433	0.139691	0.236856	0.368136	0.497486
0.274448	0.268098	0.259857	0.240502	0.222106	0.216178	0.210249	0.206502	0.202773	0.206285	0.210482	0.237506	0.269252	0.335043	0.412722	0.453251	0.474539	0.495827	0.509439	0.511585	0.496431	0.44593	0.419227	0.464378	0.523873	0.658227	0.793004	0.932504	1.07183	1.1373	1.20277	1.12098	1.02645	0.899594	0.766768	0.640403	0.515942	0.429837	0.361932	0.321194	0.298431	0.278991	0.262698	0.25005	0.242234	0.233091	0.221386	0.220801	0.251601	0.295365
0.273684	0.255774	0.220675	0.177764	0.14116	0.109634	0.0870043	0.0732665	0.0636389	0.0534842	0.0505619	0.0603094	0.0775862	0.0991929	0.146138	0.204121	0.281423	0.383741	0.496598	0.61064	0.725599	0.829675	0.922063	0.97888	1.02057	1.05056	1.00017	0.932758	0.840105	0.727286	0.597549	0.509215	0.425105	0.332035	0.259227	0.203417	0.179345	0.160621	0.139563	0.126135	0.119637	0.103947	0.0868069	0.0792402	0.076551	0.0831825	0.0890751	0.0935597	0.101922	0.112245
0.0378294	0.0332722	0.0314013	0.0298839	0.0289756	0.0313827	0.0357203	0.0580531	0.0757986	0.0802213	0.0780562	0.0717145	0.0752028	0.0811145	0.0916946	0.110778	0.135252	0.155528	0.18872	0.25368	0.349505	0.463303	0.560041	0.656295	0.756832	0.854899	0.901279	0.913566	0.877278	0.799646	0.705393	0.572494	0.450514	0.344079	0.256453	0.178915	0.139634	0.105812	0.0791501	0.064492	0.0535012	0.0397811	0.0343132	0.0396692	0.0450391	0.0510129	0.062844	0.0746751	0.0909461	0.113755
0.542118	0.582634	0.611232	0.635504	0.620223	0.604943	0.577404	0.546685	0.508045	0.460623	0.415792	0.384135	0.352477	0.337943	0.32629	0.321574	0.322917	0.329558	0.354787	0.380017	0.429638	0.482102	0.546028	0.618006	0.684993	0.739106	0.793219	0.808305	0.822489	0.802897	0.766774	0.718753	0.649705	0.580996	0.518561	0.456127	0.39852	0.342686	0.299634	0.275172	0.251122	0.230901	0.210681	0.201799	0.195925	0.192183	0.190707	0.190208	0.19475	0.199291
0.194878	0.134144	0.0979815	0.067374	0.047964	0.0475427	0.0601433	0.139691	0.236856	0.368136	0.497486	0.625514	0.729892	0.8289	0.918113	0.964909	0.984995	0.969254	0.950745	0.931673	0.917259	0.933045	0.92407	0.884829	0.808488	0.722443	0.636036	0.555427	0.48126	0.435235	0.39367	0.341112	0.300623	0.272517	0.223818	0.171978	0.12474	0.0854598	0.0537151	0.0350515	0.0195788	0.00687652	-0.0023401	-0.00823707	-0.0129921	-0.0150049	-0.0094232	0.000928942	0.0144462	0.0261443
NaN	NaN	NaN	NaN	NaN	NaN	NaN	NaN	NaN	NaN	NaN	NaN	0.211969	0.299398	0.38511	0.423209	0.461309	0.476504	0.490859	0.477752	0.461493	0.484298	0.515413	0.536601	0.554449	0.56431	0.570106	0.575902	0.561018	0.534821	0.533867	0.552427	0.610177	0.710687	0.817469	0.933578	1.02423	1.06177	1.06644	0.964556	0.855863	0.711934	0.572569	0.483214	0.39425	0.354938	0.315626	0.294663	0.275005	0.277403
0.130528	0.127236	0.12191	0.11276	0.103525	0.0942421	0.0923726	0.0899768	0.0858685	0.0798648	0.0728352	0.062053	0.052134	0.0440601	0.0360552	0.0280877	0.0338991	0.0573262	0.1164	0.203438	0.3056	0.393189	0.448679	0.439026	0.395608	0.335484	0.275267	0.225331	0.196351	0.175312	0.158332	0.155902	0.160548	0.179614	0.199029	0.21837	0.211606	0.197241	0.168725	0.143678	0.120421	0.104913	0.0893584	0.0737159	0.0620817	0.0523075	0.0483694	0.047924	0.0545828	0.0656408
0.699726	0.65479	0.607776	0.549623	0.490525	0.421094	0.351955	0.311772	0.271588	0.246349	0.222135	0.211417	0.202831	0.184021	0.162422	0.14924	0.139469	0.125494	0.109127	0.0973666	0.0891504	0.0900336	0.100518	0.136127	0.207684	0.312114	0.480696	0.632225	0.733403	0.819255	0.834809	0.850363	0.862431	0.746949	0.631466	0.507843	0.383816	0.267098	0.151408	0.0798874	0.0191066	-0.0107963	-0.0293017	-0.0314572	-0.0250465	0.0107145	0.0677291	0.147576	0.249696	0.367453
0.0186566	0.0150842	0.0144264	0.0205296	0.0249053	0.028239	0.0341187	0.0377684	0.036081	0.0387549	0.0438439	0.0554097	0.0662213	0.0750572	0.0805571	0.0842111	0.0818449	0.0804169	0.0816572	0.081146	0.0796665	0.0750448	0.0716071	0.0711489	0.0751931	0.0817261	0.101596	0.128891	0.172039	0.229973	0.296073	0.357904	0.40471	0.42034	0.422652	0.383785	0.332358	0.271999	0.216104	0.164975	0.127152	0.0973839	0.0733437	0.0614336	0.0512694	0.0425224	0.0365127	0.0324497	0.0297756	0.0325198
0.775768	0.766325	0.756784	0.744472	0.729234	0.706872	0.679729	0.634894	0.585388	0.530598	0.478249	0.424757	0.361489	0.299728	0.239672	0.199602	0.17143	0.184212	0.206522	0.238772	0.259328	0.277384	0.296859	0.316996	0.337825	0.352913	0.36682	0.367629	0.361371	0.355336	0.351458	0.351961	0.354501	0.357712	0.327282	0.291637	0.246281	0.200825	0.155486	0.126606	0.0998562	0.0770671	0.0542972	0.0318191	0.0186273	0.0094082	0.00757349	0.00929517	0.0127006	0.0188574
0.391307	0.417138	0.440847	0.465921	0.491776	0.512712	0.529838	0.542776	0.551349	0.557128	0.558952	0.565883	0.582654	0.595633	0.598019	0.604607	0.629163	0.651998	0.661871	0.67258	0.702757	0.732934	0.740261	0.746863	0.738929	0.729289	0.724953	0.721757	0.755243	0.801968	0.850362	0.899707	0.93157	0.94906	0.943124	0.909755	0.872034	0.827414	0.786076	0.752555	0.721656	0.701615	0.679968	0.645611	0.611735	0.600952	0.590168	0.583886	0.577869	0.575356
0.0488761	0.0493336	0.0488345	0.0580044	0.0698537	0.0793556	0.087908	0.0952811	0.105287	0.116853	0.13551	0.160506	0.194071	0.225386	0.253352	0.252757	0.244876	0.227146	0.204845	0.183307	0.17998	0.229161	0.343564	0.438862	0.528323	0.630487	0.796473	0.90496	0.957359	0.980321	0.984483	0.929712	0.858184	0.771557	0.653166	0.531105	0.418238	0.317023	0.226299	0.162132	0.1095	0.0861212	0.0692464	0.0582233	0.0526721	0.0490552	0.0496197	0.0517018	0.0551504	0.0618624
0.214164	0.21501	0.213633	0.210956	0.215046	0.227806	0.260829	0.366448	0.514447	0.71767	0.892009	0.98922	0.983436	0.912191	0.761993	0.618464	0.508446	0.420282	0.346018	0.293417	0.251945	0.237405	0.229588	0.226045	0.224103	0.22369	0.218842	0.22509	0.288628	0.370434	0.469775	0.523908	0.555943	0.52798	0.479935	0.412736	0.373449	0.33812	0.298972	0.261033	0.224156	0.182619	0.142376	0.110996	0.0809663	0.0521249	0.040965	0.0324005	0.0271784	0.0239044
0.988336	1.02829	1.01497	0.977522	0.886987	0.790582	0.674373	0.57076	0.545431	0.525837	0.590122	0.654407	0.766225	0.879635	0.950126	1.01566	1.04625	1.06935	1.04266	0.997526	0.952109	0.906539	0.861522	0.816909	0.783338	0.761113	0.738137	0.714124	0.68186	0.634081	0.588434	0.548573	0.511164	0.48412	0.456603	0.425456	0.395061	0.381588	0.368115	0.347462	0.326596	0.3424	0.362681	0.367665	0.369263	0.387008	0.410285	0.409705	0.39731	0.373265
0.0408989	0.049069	0.0570461	0.0632777	0.065817	0.0684025	0.074438	0.0804736	0.0939757	0.110979	0.131208	0.15677	0.183472	0.225639	0.267807	0.304513	0.339481	0.366966	0.385409	0.400232	0.393575	0.386918	0.35817	0.324455	0.294335	0.267695	0.242879	0.225264	0.207648	0.214818	0.224983	0.238923	0.255694	0.275277	0.303426	0.331575	0.344146	0.355363	0.353689	0.343696	0.327259	0.295895	0.264532	0.253128	0.241815	0.25046	0.268775	0.28259	0.288523	0.294658
0.0768929	0.0765215	0.0762989	0.0789559	0.084979	0.0971126	0.108502	0.119643	0.135757	0.149608	0.159358	0.175954	0.195732	0.208663	0.221835	0.235443	0.25872	0.334542	0.415746	0.502892	0.576915	0.635663	0.618403	0.591912	0.554392	0.504732	0.449804	0.381178	0.319319	0.265548	0.21905	0.177811	0.158203	0.13777	0.116428	0.101302	0.0891277	0.0868237	0.0879282	0.092788	0.0925393	0.0821952	0.0728233	0.0639612	0.0554576	0.0529418	0.0622561	0.0668558	0.0687574	0.0693314
0.243853	0.245668	0.243589	0.242161	0.245906	0.25083	0.286128	0.321425	0.332895	0.34331	0.350653	0.35759	0.345039	0.327706	0.322072	0.320735	0.327052	0.337611	0.35332	0.3729	0.418473	0.493241	0.590873	0.724384	0.846439	0.943788	1.02546	1.05608	1.07812	1.05318	1.02716	0.988075	0.948987	0.875744	0.802106	0.688556	0.571165	0.459417	0.348781	0.281373	0.227947	0.190418	0.160399	0.14805	0.1472	0.161746	0.190054	0.22478	0.267413	0.305795
0.424603	0.324896	0.259627	0.1994	0.15877	0.122649	0.116023	0.109436	0.103473	0.0975094	0.111462	0.125644	0.142006	0.158578	0.177952	0.197859	0.221154	0.245471	0.250513	0.247135	0.244288	0.241764	0.234469	0.223234	0.218804	0.221938	0.228062	0.238754	0.253116	0.275158	0.305693	0.361759	0.428659	0.547426	0.656259	0.674893	0.69211	0.658615	0.625121	0.521487	0.414254	0.34842	0.2885	0.257965	0.234639	0.226832	0.224919	0.224174	0.224057	0.224063
0.448679	0.439026	0.395608	0.335484	0.275267	0.225331	0.196351	0.175312	0.158332	0.155902	0.160548	0.179614	0.199029	0.21837	0.211606	0.197241	0.168725	0.143678	0.120421	0.104913	0.0893584	0.0737159	0.0620817	0.0523075	0.0483694	0.047924	0.0545828	0.0656408	0.0790717	0.117647	0.172342	0.261215	0.338063	0.408425	0.45063	0.473235	0.424441	0.364505	0.28737	0.227618	0.179996	0.146874	0.121581	0.114559	0.107646	0.100802	0.100404	0.099243	0.0938673	0.0902164
NaN	NaN	NaN	NaN	NaN	NaN	NaN	NaN	NaN	NaN	NaN	NaN	NaN	NaN	NaN	NaN	NaN	NaN	0.0606222	0.0597783	0.0673483	0.0878274	0.155742	0.239083	0.322424	0.475507	0.636261	0.779756	0.835501	0.808475	0.73291	0.645368	0.540243	0.440429	0.346059	0.265701	0.195158	0.15797	0.120781	0.0838205	0.04697	0.037422	0.0300858	0.0272534	0.0216909	0.0146905	0.0082127	0.00361876	0.0031233	0.00671455
0.0281972	0.0279817	0.0317594	0.0355372	0.0375163	0.0391925	0.0406926	0.0421794	0.0436546	0.0478505	0.0537018	0.0647664	0.0769353	0.0900603	0.0942519	0.0968879	0.0983304	0.0949824	0.0874908	0.123531	0.19249	0.358605	0.552877	0.771503	0.904318	0.996095	0.978789	0.961483	0.878221	0.793283	0.711512	0.621723	0.527296	0.449152	0.378034	0.321227	0.258788	0.193135	0.141917	0.0969757	0.0648372	0.0434579	0.0282204	0.02145	0.0160362	0.0131167	0.00947754	0.00546166	0.00315299	0.00113615
0.449723	0.442846	0.456703	0.480762	0.524743	0.559675	0.590305	0.641186	0.69239	0.744129	0.797849	0.857265	0.909753	0.957581	0.94861	0.93257	0.906999	0.86696	0.817196	0.789378	0.772189	0.778824	0.787709	0.798107	0.768971	0.728278	0.664358	0.60689	0.553407	0.570332	0.60263	0.666878	0.71354	0.74839	0.740189	0.71559	0.652067	0.578702	0.498723	0.417485	0.334982	0.249073	0.17668	0.113358	0.0789111	0.051923	0.0409172	0.0358273	0.035046	0.0444667
0.109554	0.0957767	0.0830891	0.0716846	0.0684979	0.0688556	0.0802518	0.101944	0.13789	0.179527	0.225089	0.289924	0.378668	0.497914	0.642783	0.791494	0.890511	0.950086	0.955058	0.942867	0.88167	0.816589	0.748912	0.669831	0.58867	0.503663	0.430623	0.365586	0.329135	0.298838	0.280853	0.266477	0.254512	0.247459	0.238851	0.224913	0.204456	0.179271	0.136193	0.0933859	0.0558079	0.0352451	0.0260353	0.0181803	0.0123591	0.0110556	0.0116863	0.0151148	0.0206016	0.0291732
0.354501	0.357712	0.327282	0.291637	0.246281	0.200825	0.155486	0.126606	0.0998562	0.0770671	0.0542972	0.0318191	0.0186273	0.0094082	0.00757349	0.00929517	0.0127006	0.0188574	0.0250141	0.0299459	0.0349515	0.0418034	0.0534051	0.0699465	0.0902788	0.114754	0.15567	0.217963	0.300943	0.374108	0.439933	0.472169	0.476771	0.450236	0.435751	0.424279	0.413862	0.387586	0.344818	0.287678	0.226862	0.164281	0.117499	0.0871341	0.0688596	0.054074	0.0460869	0.0397688	0.0354873	0.0326583
0.41206	0.418888	0.430549	0.442239	0.457596	0.473289	0.472893	0.469519	0.470285	0.472303	0.475053	0.478127	0.478876	0.47821	0.469507	0.454198	0.436224	0.415333	0.394887	0.375099	0.36003	0.354579	0.348904	0.342574	0.342069	0.367918	0.390976	0.390592	0.38986	0.377306	0.364752	0.333378	0.301029	0.281596	0.263978	0.25257	0.242672	0.246956	0.256485	0.253106	0.242971	0.234208	0.226428	0.214649	0.198777	0.194675	0.206948	0.220297	0.235681	0.247716
0.0889378	0.0755235	0.073278	0.0743307	0.0770414	0.0807336	0.0855559	0.0855654	0.0920514	0.143701	0.244715	0.39819	0.593542	0.786485	0.922278	0.998948	1.0164	0.976164	0.925345	0.854046	0.768206	0.702791	0.642375	0.591369	0.535597	0.476713	0.423216	0.374328	0.337017	0.298993	0.260503	0.234089	0.212664	0.203119	0.189605	0.17328	0.152341	0.12827	0.0957184	0.0716482	0.0535951	0.0438144	0.0347026	0.0274513	0.0214808	0.0209023	0.0211473	0.0223391	0.0243481	0.025953
0.688556	0.571165	0.459417	0.348781	0.281373	0.227947	0.190418	0.160399	0.14805	0.1472	0.161746	0.190054	0.22478	0.267413	0.305795	0.337124	0.370871	0.410667	0.459913	0.545623	0.625331	0.666114	0.706898	0.747681	0.771864	0.793903	0.757423	0.707127	0.693824	0.693831	0.714422	0.745653	0.782624	0.823697	0.83721	0.823053	0.774928	0.68047	0.576634	0.455412	0.348471	0.278466	0.213869	0.17029	0.131548	0.124441	0.117377	0.110981	0.104585	0.11955
0.0486136	0.0477907	0.045067	0.0399689	0.0348708	0.0319204	0.0312387	0.0356561	0.0452872	0.0577904	0.063384	0.067165	0.0670547	0.0703047	0.0754059	0.0868221	0.0983346	0.113081	0.129771	0.136166	0.150463	0.186063	0.309382	0.489971	0.664249	0.828837	0.967567	1.01978	1.01067	0.969552	0.917796	0.84373	0.771046	0.699263	0.633343	0.567363	0.499902	0.415784	0.320819	0.261235	0.203694	0.158077	0.118495	0.106942	0.0996987	0.0987751	0.0989349	0.0989335	0.0913436	0.0820096
0.512359	0.471945	0.426175	0.40284	0.384007	0.373552	0.380543	0.397228	0.415499	0.432279	0.445875	0.466101	0.489678	0.504869	0.513312	0.508815	0.485925	0.454893	0.440663	0.430628	0.427958	0.43794	0.452641	0.453474	0.458819	0.472073	0.482867	0.492879	0.518174	0.536244	0.541615	0.545955	0.549206	0.525136	0.494543	0.452512	0.392357	0.324603	0.258728	0.197636	0.145705	0.1102	0.0826715	0.0704413	0.0607522	0.055926	0.0496401	0.0426142	0.0360431	0.0296085
0.00762166	0.0123755	0.0142262	0.0207811	0.0324936	0.0558611	0.0862518	0.142117	0.206295	0.279578	0.34126	0.405648	0.505665	0.580179	0.626754	0.671818	0.712938	0.697744	0.644535	0.588885	0.529176	0.459303	0.393818	0.33106	0.279905	0.235817	0.208793	0.196258	0.192718	0.200889	0.207283	0.207678	0.199133	0.185046	0.168179	0.151797	0.136851	0.120852	0.104254	0.0825246	0.0551789	0.0355267	0.0196356	0.0172901	0.0159323	0.0157461	0.0146575	0.0137343	0.0159862	0.0220003
0.0082127	0.00361876	0.0031233	0.00671455	0.0124583	0.0202504	0.0267566	0.0300643	0.0328294	0.035283	0.0343472	0.034437	0.0369471	0.0398342	0.0429379	0.0479997	0.0531112	0.0657404	0.0823326	0.155403	0.248586	0.384833	0.537527	0.698869	0.790995	0.848091	0.836227	0.771007	0.68012	0.574855	0.481268	0.410953	0.369273	0.341355	0.325831	0.304063	0.266671	0.216884	0.15935	0.125178	0.0920969	0.0662005	0.0442646	0.0367061	0.0304061	0.0256086	0.0183775	0.0111918	0.00827382	0.00614541
NaN	NaN	NaN	NaN	NaN	NaN	NaN	NaN	NaN	NaN	0.383772	0.455613	0.527453	0.617197	0.71249	0.802917	0.887344	0.96233	0.979417	0.996505	0.961569	0.916114	0.865769	0.809629	0.757584	0.732505	0.707426	0.686714	0.666939	0.640269	0.606686	0.568675	0.512221	0.455766	0.397306	0.338518	0.282725	0.229371	0.176018	0.131988	0.0884358	0.0600287	0.040547	0.0264589	0.023686	0.0209451	0.0202983	0.0196514	0.0163025	0.0118425
0.740189	0.71559	0.652067	0.578702	0.498723	0.417485	0.334982	0.249073	0.17668	0.113358	0.0789111	0.051923	0.0409172	0.0358273	0.035046	0.0444667	0.0591637	0.0864023	0.101041	0.107232	0.0950576	0.0793088	0.0573597	0.0354105	0.0197239	0.0078984	0.0110246	0.0196599	0.040901	0.0569989	0.0699257	0.0889556	0.104154	0.108751	0.115677	0.124039	0.11684	0.107649	0.0953431	0.0805097	0.0642261	0.0480718	0.0353576	0.0306957	0.0308119	0.0336274	0.03355	0.0334093	0.0313042	0.0282071
0.421557	0.385846	0.350429	0.317911	0.307144	0.296377	0.288298	0.280844	0.282764	0.294157	0.307344	0.32803	0.348716	0.367388	0.385718	0.406154	0.428347	0.447558	0.457368	0.467179	0.487533	0.50862	0.526435	0.542269	0.552547	0.548831	0.545115	0.518971	0.492194	0.451955	0.404487	0.363915	0.336484	0.308739	0.273055	0.237371	0.214648	0.197322	0.17662	0.150814	0.126626	0.118441	0.110255	0.0919465	0.0708127	0.0534601	0.0402701	0.0282693	0.0229029	0.0175365
0.053264	0.0645035	0.074645	0.084508	0.0952155	0.106402	0.105949	0.10502	0.103636	0.0995418	0.094039	0.0932083	0.091885	0.0895765	0.0906173	0.0936279	0.117089	0.18085	0.323542	0.500953	0.69641	0.85863	0.976678	1.00833	0.968579	0.894981	0.788994	0.684912	0.584677	0.522733	0.47926	0.452976	0.428301	0.406774	0.384658	0.362192	0.335987	0.300917	0.249992	0.197574	0.144701	0.101886	0.0675639	0.0484447	0.0388078	0.0333755	0.0335859	0.0327783	0.0299805	0.0270519
0.980175	0.989464	0.967691	0.945917	0.931072	0.919189	0.909723	0.903984	0.896879	0.86445	0.832022	0.778865	0.718634	0.655678	0.589238	0.524264	0.469343	0.414422	0.372544	0.33367	0.3056	0.288299	0.276844	0.289247	0.301649	0.342396	0.386753	0.42922	0.470309	0.510009	0.545472	0.580934	0.568655	0.553468	0.517566	0.469098	0.41427	0.345687	0.277105	0.223498	0.169919	0.134178	0.106369	0.0817927	0.0627166	0.0438643	0.0287994	0.0137346	0.00365183	-0.00471481
0.089837	0.103208	0.116079	0.127856	0.13891	0.151294	0.166813	0.182333	0.197332	0.212329	0.231115	0.251686	0.278486	0.315641	0.352796	0.412045	0.478595	0.559497	0.659469	0.753544	0.804941	0.856338	0.881804	0.901383	0.885697	0.83572	0.783949	0.724877	0.665806	0.600252	0.533872	0.485765	0.450737	0.41318	0.368232	0.323283	0.275451	0.227445	0.176025	0.122641	0.0797927	0.0590652	0.0384698	0.0257993	0.0131287	0.00867944	0.00794804	0.0082473	0.0102098	0.0135496
0.87905	0.924198	0.950441	0.967118	0.980098	0.98478	0.979618	0.964341	0.91343	0.855442	0.797702	0.775517	0.789838	0.818818	0.872379	0.916167	0.953171	0.918765	0.875135	0.816054	0.76614	0.721843	0.722619	0.721442	0.716696	0.681821	0.632143	0.566999	0.511623	0.474106	0.473002	0.488032	0.50642	0.517255	0.514294	0.49161	0.460229	0.408986	0.342976	0.275949	0.215723	0.18092	0.157366	0.14287	0.140619	0.135367	0.112605	0.0897724	0.0668825	0.0466537
0.0676662	0.0644268	0.0629641	0.0642783	0.0738467	0.0884074	0.128774	0.208091	0.348279	0.557975	0.786968	0.930958	1.015	1.00535	0.908283	0.78272	0.71059	0.64945	0.605483	0.562122	0.520025	0.497055	0.474086	0.467185	0.464355	0.468975	0.461935	0.446807	0.395892	0.340336	0.278887	0.221883	0.167959	0.137235	0.111338	0.0938074	0.0827202	0.0760999	0.0672583	0.0589195	0.0523812	0.0511814	0.0533831	0.0570027	0.0621056	0.0709179	0.0792212	0.0808225	0.0820489	0.0827377
0.711084	0.627638	0.601702	0.580095	0.558487	0.596368	0.650331	0.724275	0.806645	0.863904	0.906378	0.925621	0.925139	0.916845	0.899644	0.886077	0.87812	0.868929	0.857125	0.847106	0.842596	0.840061	0.847238	0.854975	0.867942	0.880599	0.877129	0.873658	0.816967	0.757286	0.69514	0.632642	0.560893	0.486714	0.429697	0.379406	0.334647	0.293022	0.263757	0.243971	0.220337	0.192566	0.169517	0.153444	0.137914	0.123516	0.111764	0.108224	0.103027	0.0893767
0.372353	0.433993	0.527883	0.633863	0.7672	0.833813	0.843633	0.795917	0.729767	0.626112	0.548299	0.49248	0.425504	0.365989	0.3382	0.317405	0.302096	0.304954	0.307883	0.303954	0.296116	0.28521	0.275252	0.267301	0.273216	0.286273	0.312462	0.34668	0.396431	0.435592	0.469784	0.495723	0.509063	0.496075	0.464935	0.424479	0.365026	0.303879	0.23994	0.18093	0.124685	0.0895901	0.0630998	0.0545955	0.0485233	0.0438146	0.0399213	0.03684	0.038025	0.0406884
0.605525	0.601239	0.595225	0.609947	0.6274	0.672866	0.725195	0.796943	0.875822	0.922784	0.952499	0.960144	0.951341	0.944413	0.939444	0.926096	0.900542	0.867214	0.817578	0.761854	0.686312	0.61013	0.530598	0.452749	0.398638	0.344528	0.371902	0.400923	0.473534	0.550742	0.605375	0.655259	0.65555	0.639152	0.599663	0.549014	0.501313	0.455578	0.394969	0.319603	0.24355	0.166579	0.093593	0.0279549	-0.0210893	-0.0264734	-0.0302384	-0.0276775	-0.0252299	-0.0235875
1.02847	0.981613	0.930621	0.877489	0.813354	0.745689	0.671358	0.61899	0.577615	0.573792	0.585054	0.626379	0.666562	0.706121	0.741626	0.778307	0.817527	0.857063	0.897564	0.932189	0.96267	0.957982	0.948981	0.937632	0.940175	0.953343	0.940635	0.916379	0.864006	0.797066	0.718974	0.675925	0.649652	0.665286	0.673477	0.675978	0.641407	0.589859	0.498061	0.40495	0.310836	0.259824	0.221271	0.207228	0.194514	0.182734	0.155267	0.128745	0.110011	0.103441
[truncated: 131 more columns]

## Sheet: Fig 3C
Time relative to onset of a forward run (s)
-20	-19.5	-19	-18.5	-18	-17.5	-17	-16.5	-16	-15.5	-15	-14.5	-14	-13.5	-13	-12.5	-12	-11.5	-11	-10.5	-10	-9.5	-9	-8.5	-8	-7.5	-7	-6.5	-6	-5.5	-5	-4.5	-4	-3.5	-3	-2.5	-2	-1.5	-1	-0.5	0	0.5	1	1.5	2	2.5	3	3.5	4	4.5
Calcium activity in AIY (dR/R0)
3.01292	2.86517	2.68898	2.50509	2.22447	1.94924	1.71757	1.50331	1.38632	1.27531	1.19113	1.11131	1.0472	0.973265	0.870705	0.762304	0.639601	0.516318	0.390953	0.276033	0.191197	0.117834	0.0723533	0.0337053	0.00908018	-0.000273633	0.0173616	0.0409102	0.0737304	0.116754	0.173341	0.218947	0.252116	0.272594	0.280814	0.299111	0.326027	0.352007	0.377301	0.431194	0.502872	0.544246	0.56935	0.601558	0.636978	0.649221	0.652731	0.728013	0.825206	1.2845
0.160175	0.208257	0.251245	0.293788	0.349714	0.406165	0.413081	0.414566	0.382625	0.348702	0.339334	0.332566	0.405754	0.483569	0.632028	0.790017	1.03419	1.29152	1.62875	1.93834	2.12821	2.26798	2.22914	2.13281	1.87185	1.59947	1.29877	1.02688	0.813799	0.61998	0.460568	0.323816	0.222082	0.140212	0.0842154	0.0544882	0.0522367	0.0580476	0.0712257	0.104267	0.15328	0.209948	0.271843	0.365758	0.479443	0.557932	0.617494	0.662458	0.700933	0.728201
NaN	NaN	NaN	NaN	NaN	NaN	NaN	NaN	NaN	NaN	NaN	NaN	NaN	NaN	NaN	NaN	NaN	NaN	NaN	NaN	NaN	NaN	NaN	NaN	NaN	NaN	NaN	NaN	NaN	NaN	NaN	NaN	NaN	NaN	NaN	NaN	NaN	NaN	NaN	NaN	1.5697	1.42275	1.2795	1.1758	1.0721	0.988727	0.905733	0.92099	0.953406	0.944485
0.348911	0.379957	0.444129	0.504565	0.55309	0.603128	0.657163	0.713007	0.77287	0.887182	1.10514	1.29596	1.44221	1.63303	1.88794	2.03878	2.06036	2.05195	2.01132	1.87166	1.5872	1.30891	1.0385	0.80756	0.620473	0.458892	0.322217	0.226125	0.164601	0.121888	0.093309	0.0795645	0.075653	0.106566	0.157467	0.230135	0.313854	0.413682	0.520578	0.597265	0.654094	0.685034	0.70171	0.702573	0.695547	0.70145	0.712996	0.721014	0.727694	0.833007
0.286219	0.211395	0.138816	0.0966925	0.0587158	0.0697505	0.0852947	0.331253	0.589874	0.791454	0.983398	1.09652	1.18864	1.03098	0.821906	0.671311	0.531921	0.451739	0.380779	0.350087	0.324025	0.306279	0.289387	0.288608	0.288809	0.291228	0.293729	0.301522	0.308905	0.307981	0.307455	0.311969	0.31597	0.315783	0.315548	0.31369	0.34329	0.93608	1.53402	2.18482	2.83653	3.49523	4.11406	3.98246	3.8401	3.58392	3.32242	3.01366	2.71416	2.47686
0.462173	0.428801	0.388628	0.365662	0.347686	0.365654	0.391772	0.458562	0.532253	0.585546	0.636401	0.662246	0.686285	0.704418	0.722335	0.742891	0.763472	0.773874	0.783442	0.755579	0.726243	0.696329	0.666472	0.638423	0.611016	0.595772	0.580517	0.565102	0.549686	0.538862	0.529208	0.60168	0.680131	0.868974	1.08132	1.53236	1.99275	2.51848	3.02247	3.41483	3.73461	3.75837	3.72088	3.48684	3.24998	3.0057	2.8284	2.80553	2.84453	3.00288
0.139666	0.150027	0.160731	0.172537	0.180253	0.176399	0.176238	0.18508	0.19097	0.190825	0.1988	0.220831	0.23621	0.241526	0.250333	0.268736	0.283995	0.292046	0.30518	0.3281	0.342381	0.342596	0.342148	0.34074	0.327794	0.300296	0.283948	0.279865	0.274144	0.26685	0.262803	0.261435	0.257166	0.24977	0.256796	0.286952	0.585431	1.25479	2.00391	2.85066	3.6237	4.31274	4.74468	4.71335	4.63036	4.41522	4.21973	4.06613	3.94034	3.86832
0.0987793	0.0853527	0.075614	0.0815507	0.0866722	0.0850626	0.0841342	0.0871967	0.0903589	0.0939637	0.0976542	0.102198	0.106661	0.110584	0.113968	0.109679	0.106281	0.113807	0.121333	0.135293	0.149376	0.191105	0.235397	0.289655	0.344433	0.412776	0.481035	0.529366	0.578327	0.638664	0.69779	0.745378	0.791702	0.829499	0.862344	0.870473	0.899722	1.00903	1.23298	1.83066	2.43889	3.07593	3.68234	4.21868	4.54334	4.44789	4.31632	4.11878	3.87689	3.56259
0.500451	0.499991	0.518486	0.577436	0.66424	0.732146	0.789052	0.788248	0.759023	0.765794	0.787574	0.858007	0.945829	1.02038	1.09095	1.05699	0.996121	0.889265	0.772958	0.682187	0.595331	0.570797	0.552953	0.535289	0.517639	0.531285	0.546357	0.537464	0.527753	0.494625	0.460131	0.405813	0.355403	0.34317	0.339601	0.392707	0.45661	0.575347	0.700495	0.850899	0.991799	1.10234	1.29782	1.71809	2.06593	2.24961	2.4476	2.69936	2.82264	2.5342
0.793324	0.782046	0.773778	0.760944	0.746921	0.757583	0.77421	0.78337	0.791141	0.859071	0.936601	1.20207	1.49741	1.99432	2.55651	3.15803	3.77009	4.00882	4.16721	4.07693	3.94698	3.63766	3.27798	2.90392	2.52666	2.16708	1.81056	1.55512	1.31231	1.18335	1.06337	0.991877	0.922469	0.93117	0.942229	1.00729	1.09183	1.41789	1.74394	2.20783	2.67593	3.11973	3.56102	3.71002	3.84238	3.65543	3.46665	3.28074	3.09516	2.98796
0.926309	0.901046	0.881624	0.803232	0.708439	0.601639	0.492416	0.37734	0.261378	0.187792	0.118683	0.0797553	0.0425353	0.0241779	0.00647575	0.00655541	0.0072132	0.0193217	0.0307837	0.0354964	0.0417625	0.058608	0.0756836	0.10023	0.126516	0.175889	0.225585	0.296252	0.366472	0.429639	0.491043	0.533997	0.568115	0.542105	0.515938	0.489017	0.464612	0.449258	0.442186	0.458888	0.479931	0.511872	0.561086	0.645924	0.757717	0.917632	1.07847	1.24075	1.35647	1.40905
0.0461957	0.0593356	0.0612933	0.0665052	0.0759366	0.0940819	0.1295	0.17694	0.24443	0.51102	1.06088	1.50368	1.81701	2.02864	2.13389	1.94035	1.46195	1.09145	0.812679	0.599996	0.458829	0.353151	0.282029	0.225504	0.181347	0.149625	0.126894	0.114779	0.10933	0.12452	0.150818	0.159605	0.160087	0.152828	0.142529	0.148601	0.159959	0.190138	0.225268	0.384977	0.572076	1.026	1.52362	2.10483	2.69731	3.16818	3.62835	3.6011	3.5498	3.26109
3.40971	3.25636	3.01232	2.77221	2.53356	2.33381	2.14575	2.00995	1.88931	1.71644	1.52169	1.25789	0.969922	0.707742	0.452895	0.315471	0.204409	0.155806	0.117984	0.112091	0.11004	0.124939	0.141142	0.147047	0.152669	0.182252	0.211686	0.237898	0.263758	0.285922	0.304407	0.294779	0.281754	0.249772	0.220092	0.230885	0.241678	0.351588	0.462132	0.542459	0.620557	0.663371	0.697791	0.64887	0.605462	0.598578	0.602984	0.660658	0.830467	1.41419
0.635489	0.695683	0.75388	0.796193	0.824834	0.834336	0.829699	0.785773	0.716915	0.637483	0.552141	0.47495	0.401823	0.340609	0.284374	0.248569	0.219836	0.191192	0.162592	0.157441	0.162211	0.174309	0.188978	0.218578	0.252529	0.321823	0.400319	0.55744	0.732081	0.892397	1.05026	1.1061	1.14925	1.03522	0.907802	0.790429	0.673545	0.66526	0.658366	0.781701	0.911206	1.27577	1.63783	1.96311	2.27141	2.42651	2.54209	2.38322	2.21079	1.96787
0.900609	0.842495	0.784221	0.718286	0.652237	0.584346	0.513321	0.412931	0.316465	0.246247	0.183742	0.159333	0.137706	0.12703	0.117628	0.112495	0.107989	0.10746	0.104561	0.0905979	0.0766506	0.0627608	0.0490128	0.0356946	0.0241484	0.01707	0.011508	0.011219	0.00932931	0.00292598	0.00243997	0.0157988	0.0236119	0.0203388	0.0256315	0.0461957	0.0593356	0.0612933	0.0665052	0.0759366	0.0940819	0.1295	0.17694	0.24443	0.51102	1.06088	1.50368	1.81701	2.02864	2.13389
0.150809	0.173173	0.200031	0.219718	0.229487	0.245127	0.267745	0.2724	0.258221	0.24703	0.238524	0.214073	0.177028	0.158234	0.151818	0.14366	0.134472	0.13853	0.14964	0.177013	0.211761	0.252186	0.294905	0.31908	0.336679	0.321536	0.296921	0.277788	0.259962	0.299994	0.350594	0.473997	0.607176	0.746702	0.886771	0.90569	0.915424	0.849602	0.783701	1.15022	1.52569	2.14682	2.76619	3.36214	3.9092	4.04872	4.13428	3.8913	3.62365	3.23798
3.66222	3.98793	3.90347	3.75345	3.48626	3.19545	2.86841	2.56893	2.30574	2.09506	1.98694	1.86659	1.72631	1.54803	1.31679	1.07451	0.819474	0.59368	0.411375	0.268058	0.177023	0.109141	0.0682376	0.0552211	0.0703973	0.0869099	0.104582	0.143028	0.197059	0.232854	0.256842	0.316806	0.396893	0.45662	0.506823	0.585313	0.675063	0.708324	0.722877	0.782047	0.853133	1.30564	1.84006	2.37752	2.91549	3.37215	3.81926	3.64807	3.43097	3.29407
NaN	NaN	NaN	NaN	NaN	NaN	NaN	NaN	NaN	NaN	NaN	NaN	NaN	NaN	NaN	NaN	NaN	NaN	NaN	NaN	NaN	NaN	NaN	NaN	NaN	NaN	NaN	NaN	NaN	NaN	NaN	NaN	NaN	NaN	NaN	NaN	0.804045	0.68581	0.570823	0.476665	0.391856	0.353715	0.327254	0.348911	0.379957	0.444129	0.504565	0.55309	0.603128	0.657163
0.201636	0.280411	0.362931	0.431979	0.497822	0.563936	0.630099	0.753266	0.884094	1.17479	1.49934	1.70955	1.90176	1.87299	1.81951	1.584	1.33583	1.09988	0.866891	0.717953	0.573917	0.507971	0.459833	0.578202	0.710885	0.942147	1.17055	1.38443	1.56051	1.59322	1.57749	1.40721	1.22296	1.00143	0.791673	0.607381	0.466384	0.40306	0.373504	0.395514	0.457555	0.573128	0.731202	0.93727	1.13282	1.31825	1.45428	1.54847	1.5824	1.57046
1.57046	1.58727	1.62251	1.65717	1.69152	1.67771	1.64319	1.53958	1.41162	1.29571	1.18314	1.14266	1.11725	1.03388	0.942231	0.809566	0.672697	0.495849	0.316567	0.224096	0.133486	0.0936018	0.0553301	0.0590034	0.0610814	0.0466659	0.0352279	0.0451778	0.0545972	0.0612707	0.0738239	0.110836	0.143995	0.16454	0.194798	0.250784	0.312214	0.385668	0.506651	0.713811	0.957848	1.26063	1.61514	2.03841	2.33195	2.47765	2.52788	2.48674	2.31771	2.04854
0.336579	0.367502	0.388717	0.407059	0.417037	0.434705	0.47088	0.505629	0.537473	0.552446	0.538233	0.530415	0.531989	0.61235	0.800924	1.12187	1.60725	2.12142	2.66593	3.13947	3.54774	3.76814	3.83538	3.67573	3.36022	2.91076	2.3795	1.82821	1.26618	0.912466	0.653067	0.487688	0.357471	0.284049	0.228999	0.210694	0.202031	0.203021	0.207654	0.238122	0.276309	0.312687	0.348156	0.4115	0.486578	0.693919	0.975721	1.32468	1.70556	2.18244
0.145243	0.104545	0.0653364	0.0357231	0.00787895	0.01051	0.0142469	0.0290453	0.0449204	0.0684822	0.0937057	0.145312	0.196918	0.276623	0.35746	0.424875	0.490956	0.524564	0.555921	0.560732	0.568732	0.601176	0.640741	0.716032	0.784907	0.828127	0.856819	0.83995	0.807474	0.734798	0.657834	0.571805	0.489204	0.417489	0.355411	0.317949	0.306249	0.349398	0.436159	0.600068	0.768852	0.944902	1.09984	1.22851	1.32288	1.3809	1.42481	1.45607	1.53814	1.65871
0.463453	0.438863	0.424514	0.407354	0.382259	0.36299	0.357611	0.340758	0.300106	0.267438	0.248297	0.230535	0.215027	0.201831	0.192004	0.184753	0.18359	0.189083	0.208172	0.227068	0.245633	0.258925	0.264411	0.264992	0.259307	0.257391	0.25958	0.267967	0.281965	0.301541	0.325627	0.382119	0.461083	0.565268	0.684351	0.792427	0.894939	1.20644	1.61429	2.16711	2.77405	3.34853	3.91242	4.09017	4.16765	3.99375	3.76888	3.50441	3.23388	2.99565
1.51197	1.37285	1.24949	1.19675	1.15035	1.1324	1.11661	1.08204	1.0468	1.04526	1.04955	1.22486	1.41416	1.83383	2.25363	2.67482	3.06549	3.2493	3.40367	3.40953	3.41602	3.42525	3.42839	3.41015	3.3432	3.131	2.87658	2.51917	2.16822	1.83066	1.52875	1.29274	1.10169	0.978651	0.88194	0.821259	0.801042	0.828357	0.875195	0.944767	1.04116	1.16463	1.44661	1.87985	2.37242	2.91365	3.3708	3.76178	3.85881	3.75286
0.0089382	0.00427232	0.00217311	-0.007521	-0.0278181	-0.0383577	-0.037222	-0.0328462	-0.0251667	-0.0143605	-0.000810131	0.00629448	0.00866951	0.0180746	0.0319627	0.034243	0.0301848	0.0313466	0.0348693	0.0426632	0.0521128	0.0749304	0.102005	0.124138	0.144091	0.151459	0.15418	0.170404	0.190701	0.193973	0.193249	0.19233	0.191376	0.171112	0.144127	0.140726	0.14437	0.156425	0.170484	0.202535	0.237766	0.278435	0.319825	0.42633	0.53915	1.42832	2.35908	3.07696	3.78835	4.29498
1.22851	1.32288	1.3809	1.42481	1.45607	1.53814	1.65871	1.73488	1.76792	1.77063	1.74825	1.62223	1.42326	1.22957	1.03902	0.8594	0.685247	0.534812	0.39423	0.288454	0.194522	0.160725	0.142509	0.130367	0.119399	0.160175	0.208257	0.251245	0.293788	0.349714	0.406165	0.413081	0.414566	0.382625	0.348702	0.339334	0.332566	0.405754	0.483569	0.632028	0.790017	1.03419	1.29152	1.62875	1.93834	2.12821	2.26798	2.22914	2.13281	1.87185
0.154005	0.155918	0.160086	0.166474	0.195007	0.223667	0.253199	0.282821	0.312889	0.334717	0.323673	0.311931	0.298121	0.279348	0.248552	0.224605	0.214919	0.204743	0.193698	0.198441	0.228058	0.26122	0.299156	0.334071	0.365524	0.381058	0.379749	0.393035	0.419272	0.511476	0.65306	0.781911	0.902478	0.949026	0.954517	0.872863	0.753382	0.661083	0.578583	0.628649	0.71641	0.892336	1.08648	1.19859	1.28609	1.36545	1.44282	1.41347	1.3639	1.36754
NaN	NaN	NaN	NaN	NaN	NaN	NaN	NaN	NaN	NaN	NaN	NaN	NaN	NaN	1.59237	2.25676	2.92114	3.32326	3.70866	3.65321	3.56957	3.20081	2.83206	2.44939	2.06402	1.77988	1.51197	1.37285	1.24949	1.19675	1.15035	1.1324	1.11661	1.08204	1.0468	1.04526	1.04955	1.22486	1.41416	1.83383	2.25363	2.67482	3.06549	3.2493	3.40367	3.40953	3.41602	3.42525	3.42839	3.41015
0.65306	0.781911	0.902478	0.949026	0.954517	0.872863	0.753382	0.661083	0.578583	0.628649	0.71641	0.892336	1.08648	1.19859	1.28609	1.36545	1.44282	1.41347	1.3639	1.36754	1.37921	1.24735	1.10143	0.935596	0.768517	0.591432	0.416406	0.327972	0.24384	0.214844	0.187454	0.17249	0.158137	0.155877	0.153185	0.146027	0.138628	0.129562	0.136374	0.2207	0.334945	0.554132	0.796078	1.10216	1.4325	1.81856	2.12882	2.285	2.35918	2.29326
1.14648	1.03687	0.943234	0.909586	0.902963	0.899688	0.897671	0.903075	0.91081	0.874453	0.827145	0.80336	0.784156	0.753073	0.719872	0.705364	0.696225	0.697757	0.701786	0.739074	0.782327	0.811136	0.838116	0.836676	0.832963	0.814343	0.793324	0.782046	0.773778	0.760944	0.746921	0.757583	0.77421	0.78337	0.791141	0.859071	0.936601	1.20207	1.49741	1.99432	2.55651	3.15803	3.77009	4.00882	4.16721	4.07693	3.94698	3.63766	3.27798	2.90392
2.35908	3.07696	3.78835	4.29498	4.80161	4.222	3.57411	2.956	2.33942	1.80899	1.28838	0.998768	0.71865	0.552683	0.399606	0.345736	0.297003	0.276361	0.260272	0.26329	0.264317	0.258826	0.257026	0.279016	0.303021	0.336579	0.367502	0.388717	0.407059	0.417037	0.434705	0.47088	0.505629	0.537473	0.552446	0.538233	0.530415	0.531989	0.61235	0.800924	1.12187	1.60725	2.12142	2.66593	3.13947	3.54774	3.76814	3.83538	3.67573	3.36022
NaN	NaN	NaN	NaN	NaN	NaN	NaN	NaN	NaN	NaN	NaN	NaN	NaN	NaN	NaN	NaN	NaN	NaN	NaN	NaN	NaN	NaN	NaN	NaN	NaN	NaN	NaN	NaN	NaN	NaN	NaN	NaN	NaN	NaN	NaN	NaN	NaN	NaN	1.59237	2.25676	2.92114	3.32326	3.70866	3.65321	3.56957	3.20081	2.83206	2.44939	2.06402	1.77988
1.07455	1.09629	1.11219	1.09393	1.0733	1.02449	0.983495	1.00455	1.02773	1.06265	1.11524	1.24554	1.40257	1.65359	1.92411	2.35608	2.73848	2.83417	2.87238	2.66084	2.40633	2.00165	1.62304	1.38752	1.17061	1.03153	0.900609	0.842495	0.784221	0.718286	0.652237	0.584346	0.513321	0.412931	0.316465	0.246247	0.183742	0.159333	0.137706	0.12703	0.117628	0.112495	0.107989	0.10746	0.104561	0.0905979	0.0766506	0.0627608	0.0490128	0.0356946
0.106498	0.0649053	0.0396765	0.0178787	-0.00163508	-0.00463338	0.00181677	0.00601497	0.00913478	0.0220063	0.0389391	0.0470568	0.0520763	0.066161	0.082746	0.135391	0.201636	0.280411	0.362931	0.431979	0.497822	0.563936	0.630099	0.753266	0.884094	1.17479	1.49934	1.70955	1.90176	1.87299	1.81951	1.584	1.33583	1.09988	0.866891	0.717953	0.573917	0.507971	0.459833	0.578202	0.710885	0.942147	1.17055	1.38443	1.56051	1.59322	1.57749	1.40721	1.22296	1.00143
1.32859	1.26736	1.16959	1.03319	0.875463	0.709342	0.539449	0.442906	0.374317	0.363876	0.370677	0.394934	0.423189	0.418528	0.408207	0.353545	0.293673	0.219923	0.145243	0.104545	0.0653364	0.0357231	0.00787895	0.01051	0.0142469	0.0290453	0.0449204	0.0684822	0.0937057	0.145312	0.196918	0.276623	0.35746	0.424875	0.490956	0.524564	0.555921	0.560732	0.568732	0.601176	0.640741	0.716032	0.784907	0.828127	0.856819	0.83995	0.807474	0.734798	0.657834	0.571805
0.359954	0.275445	0.241789	0.20985	0.197616	0.185467	0.174508	0.163656	0.15312	0.142601	0.147325	0.152238	0.154005	0.155918	0.160086	0.166474	0.195007	0.223667	0.253199	0.282821	0.312889	0.334717	0.323673	0.311931	0.298121	0.279348	0.248552	0.224605	0.214919	0.204743	0.193698	0.198441	0.228058	0.26122	0.299156	0.334071	0.365524	0.381058	0.379749	0.393035	0.419272	0.511476	0.65306	0.781911	0.902478	0.949026	0.954517	0.872863	0.753382	0.661083
1.52362	2.10483	2.69731	3.16818	3.62835	3.6011	3.5498	3.26109	2.96783	2.65479	2.34367	2.08468	1.84278	1.84322	1.83133	1.71403	1.609	1.58097	1.53828	1.42725	1.35035	1.40795	1.45473	1.46728	1.44446	1.25833	1.07292	0.893193	0.709511	0.503473	0.319984	0.239051	0.164766	0.11433	0.0769573	0.0777558	0.0756918	0.0662261	0.0589491	0.0563804	0.0522429	0.0452616	0.0429798	0.0480114	0.0542283	0.0631923	0.0695008	0.0705871	0.0812399	0.10778
1.18299	1.07025	0.959228	0.870797	0.8348	0.798272	0.760679	0.735375	0.731817	0.704942	0.643772	0.563012	0.457996	0.353814	0.250553	0.168619	0.106498	0.0649053	0.0396765	0.0178787	-0.00163508	-0.00463338	0.00181677	0.00601497	0.00913478	0.0220063	0.0389391	0.0470568	0.0520763	0.066161	0.082746	0.135391	0.201636	0.280411	0.362931	0.431979	0.497822	0.563936	0.630099	0.753266	0.884094	1.17479	1.49934	1.70955	1.90176	1.87299	1.81951	1.584	1.33583	1.09988
0.853133	1.30564	1.84006	2.37752	2.91549	3.37215	3.81926	3.64807	3.43097	3.29407	3.15967	3.01292	2.86517	2.68898	2.50509	2.22447	1.94924	1.71757	1.50331	1.38632	1.27531	1.19113	1.11131	1.0472	0.973265	0.870705	0.762304	0.639601	0.516318	0.390953	0.276033	0.191197	0.117834	0.0723533	0.0337053	0.00908018	-0.000273633	0.0173616	0.0409102	0.0737304	0.116754	0.173341	0.218947	0.252116	0.272594	0.280814	0.299111	0.326027	0.352007	0.377301
0.15418	0.170404	0.190701	0.193973	0.193249	0.19233	0.191376	0.171112	0.144127	0.140726	0.14437	0.156425	0.170484	0.202535	0.237766	0.278435	0.319825	0.42633	0.53915	1.42832	2.35908	3.07696	3.78835	4.29498	4.80161	4.222	3.57411	2.956	2.33942	1.80899	1.28838	0.998768	0.71865	0.552683	0.399606	0.345736	0.297003	0.276361	0.260272	0.26329	0.264317	0.258826	0.257026	0.279016	0.303021	0.336579	0.367502	0.388717	0.407059	0.417037
0.497572	0.509733	0.511814	0.505185	0.481609	0.46186	0.448453	0.448166	0.466764	0.492126	0.525828	0.573233	0.635489	0.695683	0.75388	0.796193	0.824834	0.834336	0.829699	0.785773	0.716915	0.637483	0.552141	0.47495	0.401823	0.340609	0.284374	0.248569	0.219836	0.191192	0.162592	0.157441	0.162211	0.174309	0.188978	0.218578	0.252529	0.321823	0.400319	0.55744	0.732081	0.892397	1.05026	1.1061	1.14925	1.03522	0.907802	0.790429	0.673545	0.66526
1.92411	2.35608	2.73848	2.83417	2.87238	2.66084	2.40633	2.00165	1.62304	1.38752	1.17061	1.03153	0.900609	0.842495	0.784221	0.718286	0.652237	0.584346	0.513321	0.412931	0.316465	0.246247	0.183742	0.159333	0.137706	0.12703	0.117628	0.112495	0.107989	0.10746	0.104561	0.0905979	0.0766506	0.0627608	0.0490128	0.0356946	0.0241484	0.01707	0.011508	0.011219	0.00932931	0.00292598	0.00243997	0.0157988	0.0236119	0.0203388	0.0256315	0.0461957	0.0593356	0.0612933
0.0887746	0.0779524	0.0639542	0.0512789	0.04617	0.0385752	0.0203629	0.00760136	0.0129704	0.0143972	0.00524154	0.00196308	0.0116866	0.0180152	0.0178607	0.0209988	0.0296606	0.0423089	0.0612054	0.0823523	0.106497	0.13188	0.158629	0.182284	0.203097	0.213021	0.213709	0.213288	0.21206	0.204139	0.192157	0.197817	0.213116	0.261157	0.324698	0.45069	0.602169	0.759296	0.918302	1.32001	1.78767	2.05813	2.28768	2.35629	2.40036	2.01446	1.58297	1.22569	0.873182	0.654497
0.663371	0.697791	0.64887	0.605462	0.598578	0.602984	0.660658	0.830467	1.41419	1.99705	2.57735	3.14085	3.66222	3.98793	3.90347	3.75345	3.48626	3.19545	2.86841	2.56893	2.30574	2.09506	1.98694	1.86659	1.72631	1.54803	1.31679	1.07451	0.819474	0.59368	0.411375	0.268058	0.177023	0.109141	0.0682376	0.0552211	0.0703973	0.0869099	0.104582	0.143028	0.197059	0.232854	0.256842	0.316806	0.396893	0.45662	0.506823	0.585313	0.675063	0.708324
Time relative to onset of a reversal (s)
-20	-19.5	-19	-18.5	-18	-17.5	-17	-16.5	-16	-15.5	-15	-14.5	-14	-13.5	-13	-12.5	-12	-11.5	-11	-10.5	-10	-9.5	-9	-8.5	-8	-7.5	-7	-6.5	-6	-5.5	-5	-4.5	-4	-3.5	-3	-2.5	-2	-1.5	-1	-0.5	0	0.5	1	1.5	2	2.5	3	3.5	4	4.5
Calcium activity in AIY (dR/R0)
0.507351	0.539417	0.602031	0.694507	0.865538	1.03539	1.20075	1.35954	1.49754	1.58729	1.54762	1.51433	1.5114	1.49519	1.42824	1.36337	1.30487	1.22045	1.07051	0.930034	0.809584	0.729181	0.720239	0.7327	0.777881	0.821199	0.862074	0.863028	0.818384	0.794791	0.792669	0.795433	0.802578	0.813586	0.827715	0.804057	0.753808	0.760131	0.801906	0.848568	0.897933	0.948865	1.00052	1.0226	1.03308	1.08547	1.15122	1.17928	1.19768	1.15727
0.523032	0.591046	0.658591	0.69589	0.731827	0.745453	0.755387	0.731876	0.709988	0.72773	0.745472	0.763214	0.783314	0.804289	0.829463	0.855927	0.867547	0.875567	0.885082	0.894866	0.931517	0.971332	0.975369	0.976901	0.941845	0.905272	0.82396	0.745004	0.714544	0.688362	0.706211	0.722806	0.731452	0.736082	0.721941	0.700623	0.652868	0.605878	0.561281	0.514957	0.464318	0.421165	0.40463	0.389786	0.384989	0.381594	0.384429	0.383921	0.359627	0.337925
1.23633	1.31756	1.39154	1.45505	1.52155	1.59372	1.66643	1.74002	1.77666	1.7609	1.7351	1.69637	1.655	1.61071	1.57527	1.5485	1.50562	1.43828	1.39331	1.37717	1.38339	1.41468	1.43487	1.44417	1.47169	1.51445	1.49145	1.4194	1.32938	1.228	1.10099	0.959339	0.871836	0.810731	0.807318	0.827444	0.853164	0.88071	1.05086	1.26118	1.53234	1.81703	1.98514	2.13357	2.1095	2.06534	1.88394	1.69167	1.55261	1.41614
0.381746	0.403987	0.428854	0.457209	0.4757	0.48287	0.479053	0.464204	0.454904	0.450535	0.472155	0.514488	0.563887	0.618134	0.65	0.66879	0.661027	0.639403	0.628296	0.621807	0.608867	0.593377	0.571868	0.548402	0.517967	0.485619	0.478622	0.477188	0.506323	0.540846	0.581356	0.622652	0.648412	0.672753	0.674511	0.674924	0.662402	0.649449	0.656402	0.663925	0.686954	0.713564	0.793494	0.870407	0.919202	0.971587	1.04814	1.11324	1.12044	1.12251
0.301522	0.308905	0.307981	0.307455	0.311969	0.31597	0.315783	0.315548	0.31369	0.34329	0.93608	1.53402	2.18482	2.83653	3.49523	4.11406	3.98246	3.8401	3.58392	3.32242	3.01366	2.71416	2.47686	2.24567	2.04776	1.85492	1.68522	1.52841	1.426	1.32821	1.24946	1.17379	1.10948	1.04467	0.97836	0.930688	0.933071	0.935575	0.938382	0.949906	0.981325	1.01031	1.03444	1.05861	1.08286	1.09476	1.08868	1.06092	1.00569	0.954261
0.365662	0.347686	0.365654	0.391772	0.458562	0.532253	0.585546	0.636401	0.662246	0.686285	0.704418	0.722335	0.742891	0.763472	0.773874	0.783442	0.755579	0.726243	0.696329	0.666472	0.638423	0.611016	0.595772	0.580517	0.565102	0.549686	0.538862	0.529208	0.60168	0.680131	0.868974	1.08132	1.53236	1.99275	2.51848	3.02247	3.41483	3.73461	3.75837	3.72088	3.48684	3.24998	3.0057	2.8284	2.80553	2.84453	3.00288	3.17464	3.36819	3.50726
-0.0256767	-0.0301983	-0.0279529	-0.0246484	-0.0162541	-0.00729656	0.00303436	0.0135036	0.0190853	0.0243435	0.0254631	0.0263626	0.0169638	0.00958708	0.0443694	0.0791518	0.112176	0.145063	0.171928	0.198518	0.181822	0.164371	0.148627	0.133267	0.125839	0.118679	0.114713	0.112613	0.125334	0.136661	0.138619	0.140318	0.140536	0.140455	0.138847	0.139666	0.150027	0.160731	0.172537	0.180253	0.176399	0.176238	0.18508	0.19097	0.190825	0.1988	0.220831	0.23621	0.241526	0.250333
4.09017	4.16765	3.99375	3.76888	3.50441	3.23388	2.99565	2.76121	2.54108	2.32198	2.17259	2.02428	1.81894	1.61328	1.40046	1.18922	0.996266	0.806111	0.63698	0.481058	0.396809	0.315335	0.260842	0.210167	0.188215	0.166294	0.144538	0.124201	0.11095	0.0974484	0.0812828	0.0653067	0.0574252	0.0499947	0.058028	0.0667495	0.0851887	0.102221	0.107118	0.110762	0.105406	0.0987793	0.0853527	0.075614	0.0815507	0.0866722	0.0850626	0.0841342	0.0871967	0.0903589
0.367199	0.41059	0.454196	0.455094	0.45445	0.361598	0.269869	0.210466	0.151709	0.103496	0.0597402	0.0628634	0.0645573	0.0562808	0.0498554	0.0539565	0.0538359	0.0348244	0.018524	0.0118949	0.00661515	0.0054486	0.00926122	0.0259375	0.0351089	0.0277882	0.0251475	0.0311722	0.0391336	0.0503247	0.0677713	0.0943456	0.116044	0.131546	0.173046	0.242915	0.318957	0.400874	0.472064	0.534479	0.554344	0.544218	0.525037	0.500451	0.499991	0.518486	0.577436	0.66424	0.732146	0.789052
0.944767	1.04116	1.16463	1.44661	1.87985	2.37242	2.91365	3.3708	3.76178	3.85881	3.75286	3.50847	3.18111	2.85994	2.54208	2.25026	1.97092	1.7108	1.45893	1.28748	1.14648	1.03687	0.943234	0.909586	0.902963	0.899688	0.897671	0.903075	0.91081	0.874453	0.827145	0.80336	0.784156	0.753073	0.719872	0.705364	0.696225	0.697757	0.701786	0.739074	0.782327	0.811136	0.838116	0.836676	0.832963	0.814343	0.793324	0.782046	0.773778	0.760944
1.41162	1.29571	1.18314	1.14266	1.11725	1.03388	0.942231	0.809566	0.672697	0.495849	0.316567	0.224096	0.133486	0.0936018	0.0553301	0.0590034	0.0610814	0.0466659	0.0352279	0.0451778	0.0545972	0.0612707	0.0738239	0.110836	0.143995	0.16454	0.194798	0.250784	0.312214	0.385668	0.506651	0.713811	0.957848	1.26063	1.61514	2.03841	2.33195	2.47765	2.52788	2.48674	2.31771	2.04854	1.79973	1.56431	1.36896	1.19613	1.09085	1.01872	0.96809	0.926309
1.06265	1.11524	1.24554	1.40257	1.65359	1.92411	2.35608	2.73848	2.83417	2.87238	2.66084	2.40633	2.00165	1.62304	1.38752	1.17061	1.03153	0.900609	0.842495	0.784221	0.718286	0.652237	0.584346	0.513321	0.412931	0.316465	0.246247	0.183742	0.159333	0.137706	0.12703	0.117628	0.112495	0.107989	0.10746	0.104561	0.0905979	0.0766506	0.0627608	0.0490128	0.0356946	0.0241484	0.01707	0.011508	0.011219	0.00932931	0.00292598	0.00243997	0.0157988	0.0236119
0.388717	0.407059	0.417037	0.434705	0.47088	0.505629	0.537473	0.552446	0.538233	0.530415	0.531989	0.61235	0.800924	1.12187	1.60725	2.12142	2.66593	3.13947	3.54774	3.76814	3.83538	3.67573	3.36022	2.91076	2.3795	1.82821	1.26618	0.912466	0.653067	0.487688	0.357471	0.284049	0.228999	0.210694	0.202031	0.203021	0.207654	0.238122	0.276309	0.312687	0.348156	0.4115	0.486578	0.693919	0.975721	1.32468	1.70556	2.18244	2.69741	3.00842
0.160138	0.119145	0.0830694	0.0488744	0.0153248	-0.0113762	-0.0361015	-0.0317596	-0.0208499	-0.0125143	-0.00462694	0.0168097	0.0400652	0.0583211	0.0761035	0.0906547	0.105033	0.130508	0.15612	0.17209	0.188223	0.209474	0.230286	0.243834	0.257406	0.27123	0.285999	0.307918	0.330531	0.357068	0.38213	0.400727	0.413665	0.406548	0.398543	0.38799	0.382458	0.38908	0.403791	0.445813	0.481045	0.497572	0.509733	0.511814	0.505185	0.481609	0.46186	0.448453	0.448166	0.466764
0.520219	0.517455	0.48365	0.443094	0.455195	0.476191	0.496276	0.516248	0.609108	0.708054	0.832077	0.95712	1.10368	1.2495	1.37528	1.50105	1.45465	1.40271	1.2825	1.16261	1.04938	0.945338	0.943078	0.943597	0.965144	0.983024	0.980646	0.987228	1.032	1.07455	1.09629	1.11219	1.09393	1.0733	1.02449	0.983495	1.00455	1.02773	1.06265	1.11524	1.24554	1.40257	1.65359	1.92411	2.35608	2.73848	2.83417	2.87238	2.66084	2.40633
0.384977	0.572076	1.026	1.52362	2.10483	2.69731	3.16818	3.62835	3.6011	3.5498	3.26109	2.96783	2.65479	2.34367	2.08468	1.84278	1.84322	1.83133	1.71403	1.609	1.58097	1.53828	1.42725	1.35035	1.40795	1.45473	1.46728	1.44446	1.25833	1.07292	0.893193	0.709511	0.503473	0.319984	0.239051	0.164766	0.11433	0.0769573	0.0777558	0.0756918	0.0662261	0.0589491	0.0563804	0.0522429	0.0452616	0.0429798	0.0480114	0.0542283	0.0631923	0.0695008
3.35	3.40971	3.25636	3.01232	2.77221	2.53356	2.33381	2.14575	2.00995	1.88931	1.71644	1.52169	1.25789	0.969922	0.707742	0.452895	0.315471	0.204409	0.155806	0.117984	0.112091	0.11004	0.124939	0.141142	0.147047	0.152669	0.182252	0.211686	0.237898	0.263758	0.285922	0.304407	0.294779	0.281754	0.249772	0.220092	0.230885	0.241678	0.351588	0.462132	0.542459	0.620557	0.663371	0.697791	0.64887	0.605462	0.598578	0.602984	0.660658	0.830467
NaN	NaN	NaN	NaN	NaN	NaN	NaN	NaN	NaN	NaN	NaN	NaN	NaN	NaN	NaN	NaN	NaN	NaN	NaN	NaN	NaN	NaN	NaN	NaN	NaN	NaN	NaN	NaN	NaN	NaN	NaN	NaN	NaN	NaN	NaN	NaN	NaN	NaN	NaN	NaN	NaN	NaN	NaN	NaN	NaN	NaN	NaN	NaN	NaN	NaN
0.732081	0.892397	1.05026	1.1061	1.14925	1.03522	0.907802	0.790429	0.673545	0.66526	0.658366	0.781701	0.911206	1.27577	1.63783	1.96311	2.27141	2.42651	2.54209	2.38322	2.21079	1.96787	1.72769	1.49853	1.29637	1.18299	1.07025	0.959228	0.870797	0.8348	0.798272	0.760679	0.735375	0.731817	0.704942	0.643772	0.563012	0.457996	0.353814	0.250553	0.168619	0.106498	0.0649053	0.0396765	0.0178787	-0.00163508	-0.00463338	0.00181677	0.00601497	0.00913478
0.00913478	0.0220063	0.0389391	0.0470568	0.0520763	0.066161	0.082746	0.135391	0.201636	0.280411	0.362931	0.431979	0.497822	0.563936	0.630099	0.753266	0.884094	1.17479	1.49934	1.70955	1.90176	1.87299	1.81951	1.584	1.33583	1.09988	0.866891	0.717953	0.573917	0.507971	0.459833	0.578202	0.710885	0.942147	1.17055	1.38443	1.56051	1.59322	1.57749	1.40721	1.22296	1.00143	0.791673	0.607381	0.466384	0.40306	0.373504	0.395514	0.457555	0.573128
0.0180746	0.0319627	0.034243	0.0301848	0.0313466	0.0348693	0.0426632	0.0521128	0.0749304	0.102005	0.124138	0.144091	0.151459	0.15418	0.170404	0.190701	0.193973	0.193249	0.19233	0.191376	0.171112	0.144127	0.140726	0.14437	0.156425	0.170484	0.202535	0.237766	0.278435	0.319825	0.42633	0.53915	1.42832	2.35908	3.07696	3.78835	4.29498	4.80161	4.222	3.57411	2.956	2.33942	1.80899	1.28838	0.998768	0.71865	0.552683	0.399606	0.345736	0.297003
0.118683	0.0797553	0.0425353	0.0241779	0.00647575	0.00655541	0.0072132	0.0193217	0.0307837	0.0354964	0.0417625	0.058608	0.0756836	0.10023	0.126516	0.175889	0.225585	0.296252	0.366472	0.429639	0.491043	0.533997	0.568115	0.542105	0.515938	0.489017	0.464612	0.449258	0.442186	0.458888	0.479931	0.511872	0.561086	0.645924	0.757717	0.917632	1.07847	1.24075	1.35647	1.40905	1.4228	1.39254	1.36727	1.34689	1.33448	1.32859	1.26736	1.16959	1.03319	0.875463
1.34491	1.31576	1.23125	1.13485	1.04263	0.951962	0.915138	0.8954	0.941747	1.00476	1.06476	1.12415	1.18163	1.23882	1.23417	1.22264	1.18044	1.13558	1.09489	1.05438	1.09703	1.1495	1.23909	1.33148	1.38618	1.43933	1.39134	1.34323	1.27243	1.20054	1.10223	1.00393	0.862582	0.719588	0.580229	0.440916	0.342978	0.248868	0.220642	0.198224	0.210369	0.225067	0.243211	0.261334	0.260675	0.259865	0.254649	0.249966	0.252048	0.253379
NaN	NaN	NaN	NaN	NaN	NaN	NaN	NaN	NaN	NaN	NaN	NaN	NaN	NaN	NaN	NaN	NaN	NaN	NaN	NaN	NaN	NaN	NaN	NaN	NaN	NaN	NaN	NaN	NaN	NaN	NaN	NaN	NaN	NaN	NaN	NaN	NaN	NaN	NaN	NaN	NaN	NaN	NaN	NaN	NaN	NaN	NaN	NaN	NaN	NaN
1.65839	1.78193	1.91671	2.01313	2.02569	1.99549	1.8867	1.73687	1.52279	1.32497	1.14926	0.99171	0.872088	0.784564	0.755661	0.770143	0.853418	1.00159	1.24165	1.52285	1.85404	2.12199	2.32293	2.45977	2.53773	2.5569	2.52968	2.50662	2.48637	2.43377	2.36074	2.30968	2.2705	2.2259	2.1775	2.173	2.19537	2.20445	2.20629	2.21357	2.22345	2.18235	2.10289	2.05674	2.04548	2.02242	1.98882	1.9348	1.85623	1.68641
1.4228	1.39254	1.36727	1.34689	1.33448	1.32859	1.26736	1.16959	1.03319	0.875463	0.709342	0.539449	0.442906	0.374317	0.363876	0.370677	0.394934	0.423189	0.418528	0.408207	0.353545	0.293673	0.219923	0.145243	0.104545	0.0653364	0.0357231	0.00787895	0.01051	0.0142469	0.0290453	0.0449204	0.0684822	0.0937057	0.145312	0.196918	0.276623	0.35746	0.424875	0.490956	0.524564	0.555921	0.560732	0.568732	0.601176	0.640741	0.716032	0.784907	0.828127	0.856819
0.366714	0.277696	0.190028	0.14334	0.0991961	0.0887746	0.0779524	0.0639542	0.0512789	0.04617	0.0385752	0.0203629	0.00760136	0.0129704	0.0143972	0.00524154	0.00196308	0.0116866	0.0180152	0.0178607	0.0209988	0.0296606	0.0423089	0.0612054	0.0823523	0.106497	0.13188	0.158629	0.182284	0.203097	0.213021	0.213709	0.213288	0.21206	0.204139	0.192157	0.197817	0.213116	0.261157	0.324698	0.45069	0.602169	0.759296	0.918302	1.32001	1.78767	2.05813	2.28768	2.35629	2.40036
NaN	NaN	NaN	NaN	NaN	NaN	NaN	NaN	NaN	NaN	NaN	NaN	NaN	NaN	NaN	NaN	NaN	NaN	NaN	NaN	NaN	NaN	NaN	NaN	NaN	NaN	NaN	NaN	NaN	NaN	NaN	NaN	NaN	NaN	NaN	NaN	NaN	NaN	NaN	NaN	NaN	NaN	NaN	NaN	NaN	NaN	NaN	NaN	NaN	NaN
0.213021	0.213709	0.213288	0.21206	0.204139	0.192157	0.197817	0.213116	0.261157	0.324698	0.45069	0.602169	0.759296	0.918302	1.32001	1.78767	2.05813	2.28768	2.35629	2.40036	2.01446	1.58297	1.22569	0.873182	0.654497	0.454433	0.359954	0.275445	0.241789	0.20985	0.197616	0.185467	0.174508	0.163656	0.15312	0.142601	0.147325	0.152238	0.154005	0.155918	0.160086	0.166474	0.195007	0.223667	0.253199	0.282821	0.312889	0.334717	0.323673	0.311931
2.25676	2.92114	3.32326	3.70866	3.65321	3.56957	3.20081	2.83206	2.44939	2.06402	1.77988	1.51197	1.37285	1.24949	1.19675	1.15035	1.1324	1.11661	1.08204	1.0468	1.04526	1.04955	1.22486	1.41416	1.83383	2.25363	2.67482	3.06549	3.2493	3.40367	3.40953	3.41602	3.42525	3.42839	3.41015	3.3432	3.131	2.87658	2.51917	2.16822	1.83066	1.52875	1.29274	1.10169	0.978651	0.88194	0.821259	0.801042	0.828357	0.875195
2.18235	2.10289	2.05674	2.04548	2.02242	1.98882	1.9348	1.85623	1.68641	1.42604	1.17044	0.919034	0.696661	0.507062	0.351086	0.24905	0.170722	0.124615	0.0931598	0.0796439	0.0624127	0.0393108	0.024123	0.020146	0.0151601	0.0089382	0.00427232	0.00217311	-0.007521	-0.0278181	-0.0383577	-0.037222	-0.0328462	-0.0251667	-0.0143605	-0.000810131	0.00629448	0.00866951	0.0180746	0.0319627	0.034243	0.0301848	0.0313466	0.0348693	0.0426632	0.0521128	0.0749304	0.102005	0.124138	0.144091
0	0	0	0	0	0	0	0	0	0	0	0	0	0	0	0	0	0	0	0	0	0	0	0	0	0	0	0	0	0	0	0	0	0	0	0	0	0	0	0	0	0	0	0	0	0	0	0	0	0
1.30487	1.22045	1.07051	0.930034	0.809584	0.729181	0.720239	0.7327	0.777881	0.821199	0.862074	0.863028	0.818384	0.794791	0.792669	0.795433	0.802578	0.813586	0.827715	0.804057	0.753808	0.760131	0.801906	0.848568	0.897933	0.948865	1.00052	1.0226	1.03308	1.08547	1.15122	1.17928	1.19768	1.15727	1.10441	0.975726	0.833872	0.750602	0.674716	0.629264	0.590498	0.558498	0.528832	0.520219	0.517455	0.48365	0.443094	0.455195	0.476191	0.496276
0.492126	0.525828	0.573233	0.635489	0.695683	0.75388	0.796193	0.824834	0.834336	0.829699	0.785773	0.716915	0.637483	0.552141	0.47495	0.401823	0.340609	0.284374	0.248569	0.219836	0.191192	0.162592	0.157441	0.162211	0.174309	0.188978	0.218578	0.252529	0.321823	0.400319	0.55744	0.732081	0.892397	1.05026	1.1061	1.14925	1.03522	0.907802	0.790429	0.673545	0.66526	0.658366	0.781701	0.911206	1.27577	1.63783	1.96311	2.27141	2.42651	2.54209
0.957848	1.26063	1.61514	2.03841	2.33195	2.47765	2.52788	2.48674	2.31771	2.04854	1.79973	1.56431	1.36896	1.19613	1.09085	1.01872	0.96809	0.926309	0.901046	0.881624	0.803232	0.708439	0.601639	0.492416	0.37734	0.261378	0.187792	0.118683	0.0797553	0.0425353	0.0241779	0.00647575	0.00655541	0.0072132	0.0193217	0.0307837	0.0354964	0.0417625	0.058608	0.0756836	0.10023	0.126516	0.175889	0.225585	0.296252	0.366472	0.429639	0.491043	0.533997	0.568115
0.438364	0.415599	0.393827	0.384374	0.377453	0.391234	0.405617	0.423335	0.440454	0.455022	0.472446	0.499196	0.517285	0.494818	0.470105	0.420709	0.366714	0.277696	0.190028	0.14334	0.0991961	0.0887746	0.0779524	0.0639542	0.0512789	0.04617	0.0385752	0.0203629	0.00760136	0.0129704	0.0143972	0.00524154	0.00196308	0.0116866	0.0180152	0.0178607	0.0209988	0.0296606	0.0423089	0.0612054	0.0823523	0.106497	0.13188	0.158629	0.182284	0.203097	0.213021	0.213709	0.213288	0.21206
0.718286	0.652237	0.584346	0.513321	0.412931	0.316465	0.246247	0.183742	0.159333	0.137706	0.12703	0.117628	0.112495	0.107989	0.10746	0.104561	0.0905979	0.0766506	0.0627608	0.0490128	0.0356946	0.0241484	0.01707	0.011508	0.011219	0.00932931	0.00292598	0.00243997	0.0157988	0.0236119	0.0203388	0.0256315	0.0461957	0.0593356	0.0612933	0.0665052	0.0759366	0.0940819	0.1295	0.17694	0.24443	0.51102	1.06088	1.50368	1.81701	2.02864	2.13389	1.94035	1.46195	1.09145
0.413665	0.406548	0.398543	0.38799	0.382458	0.38908	0.403791	0.445813	0.481045	0.497572	0.509733	0.511814	0.505185	0.481609	0.46186	0.448453	0.448166	0.466764	0.492126	0.525828	0.573233	0.635489	0.695683	0.75388	0.796193	0.824834	0.834336	0.829699	0.785773	0.716915	0.637483	0.552141	0.47495	0.401823	0.340609	0.284374	0.248569	0.219836	0.191192	0.162592	0.157441	0.162211	0.174309	0.188978	0.218578	0.252529	0.321823	0.400319	0.55744	0.732081
0.117984	0.112091	0.11004	0.124939	0.141142	0.147047	0.152669	0.182252	0.211686	0.237898	0.263758	0.285922	0.304407	0.294779	0.281754	0.249772	0.220092	0.230885	0.241678	0.351588	0.462132	0.542459	0.620557	0.663371	0.697791	0.64887	0.605462	0.598578	0.602984	0.660658	0.830467	1.41419	1.99705	2.57735	3.14085	3.66222	3.98793	3.90347	3.75345	3.48626	3.19545	2.86841	2.56893	2.30574	2.09506	1.98694	1.86659	1.72631	1.54803	1.31679
0.853418	1.00159	1.24165	1.52285	1.85404	2.12199	2.32293	2.45977	2.53773	2.5569	2.52968	2.50662	2.48637	2.43377	2.36074	2.30968	2.2705	2.2259	2.1775	2.173	2.19537	2.20445	2.20629	2.21357	2.22345	2.18235	2.10289	2.05674	2.04548	2.02242	1.98882	1.9348	1.85623	1.68641	1.42604	1.17044	0.919034	0.696661	0.507062	0.351086	0.24905	0.170722	0.124615	0.0931598	0.0796439	0.0624127	0.0393108	0.024123	0.020146	0.0151601
2.4476	2.69936	2.82264	2.5342	2.26013	2.02381	1.7846	1.53916	1.32315	1.16455	1.03705	0.963095	0.887377	0.808957	0.758006	0.743025	0.734056	0.731893	0.726785	0.718812	0.674164	0.598318	0.532358	0.473586	0.426058	0.38557	0.368998	0.371776	0.371455	0.368876	0.349278	0.318559	0.288504	0.258826	0.213305	0.160138	0.119145	0.0830694	0.0488744	0.0153248	-0.0113762	-0.0361015	-0.0317596	-0.0208499	-0.0125143	-0.00462694	0.0168097	0.0400652	0.0583211	0.0761035
0.862074	0.863028	0.818384	0.794791	0.792669	0.795433	0.802578	0.813586	0.827715	0.804057	0.753808	0.760131	0.801906	0.848568	0.897933	0.948865	1.00052	1.0226	1.03308	1.08547	1.15122	1.17928	1.19768	1.15727	1.10441	0.975726	0.833872	0.750602	0.674716	0.629264	0.590498	0.558498	0.528832	0.520219	0.517455	0.48365	0.443094	0.455195	0.476191	0.496276	0.516248	0.609108	0.708054	0.832077	0.95712	1.10368	1.2495	1.37528	1.50105	1.45465
0.337925	0.329477	0.319746	0.304988	0.295898	0.305871	0.31147	0.305432	0.299353	0.293184	0.285336	0.274465	0.274456	0.290798	0.327465	0.389697	0.466972	0.560767	0.632719	0.683433	0.709453	0.715506	0.698	0.664136	0.645009	0.634514	0.599041	0.551398	0.516192	0.485908	0.455394	0.424758	0.41485	0.414074	0.410141	0.405065	0.420411	0.441396	0.430909	0.413503	0.410489	0.409788	0.367618	0.320301	0.315636	0.314392	0.297029	0.279303	0.307547	0.336497
2.12142	2.66593	3.13947	3.54774	3.76814	3.83538	3.67573	3.36022	2.91076	2.3795	1.82821	1.26618	0.912466	0.653067	0.487688	0.357471	0.284049	0.228999	0.210694	0.202031	0.203021	0.207654	0.238122	0.276309	0.312687	0.348156	0.4115	0.486578	0.693919	0.975721	1.32468	1.70556	2.18244	2.69741	3.00842	3.25192	3.35	3.40971	3.25636	3.01232	2.77221	2.53356	2.33381	2.14575	2.00995	1.88931	1.71644	1.52169	1.25789	0.969922
[truncated: 131 more columns]

## Sheet: Fig 3D
Time relative to onset of a forward run (s)
-40	-39.5	-39	-38.5	-38	-37.5	-37	-36.5	-36	-35.5	-35	-34.5	-34	-33.5	-33	-32.5	-32	-31.5	-31	-30.5	-30	-29.5	-29	-28.5	-28	-27.5	-27	-26.5	-26	-25.5	-25	-24.5	-24	-23.5	-23	-22.5	-22	-21.5	-21	-20.5	-20	-19.5	-19	-18.5	-18	-17.5	-17	-16.5	-16	-15.5
Calcium activity in AIY (dR/R0)
0.183192	0.165301	0.155281	0.151271	0.151413	0.153848	0.156716	0.158158	0.156315	0.149327	0.280687	0.0960189	0.0606933	0.135462	0.281077	0.458289	0.627851	0.750514	0.78703	0.698151	0.574918	0.497107	0.433674	0.382441	0.34123	0.307865	0.280168	0.255963	0.233071	0.209316	0.192121	0.168967	0.149442	0.133506	0.12112	0.112245	0.106843	0.104874	0.106299	0.111079	0.113328	0.132815	0.143335	0.146694	0.144694	0.13914	0.131836	0.124586	0.119194	0.117463
0.122975	0.1135	0.112061	0.112156	0.115261	0.120335	0.142319	0.174406	0.191135	0.199444	0.225491	0.225627	0.247944	0.270278	0.310323	0.380684	0.454365	0.480016	0.480245	0.480474	0.441341	0.380852	0.339428	0.298158	0.26806	0.268212	0.268363	0.273409	0.292651	0.322632	0.338742	0.33892	0.339097	0.306617	0.268772	0.238603	0.21929	0.219237	0.219371	0.219505	0.228478	0.23808	0.264383	0.320803	0.386926	0.452785	0.497108	0.508014	0.508253	0.508493
0.30598	0.271556	0.241896	0.216948	0.19666	0.180979	0.169853	0.163229	0.153081	0.153245	0.152091	0.149723	0.146246	0.141763	0.136378	0.130195	0.123317	0.115849	0.109302	0.115135	0.117023	0.116466	0.114962	0.114011	0.115112	0.119764	0.129467	0.14572	0.319724	0.638423	0.811864	0.868382	0.83631	0.743982	0.61973	0.491889	0.388792	0.338772	0.322167	0.300032	0.27783	0.256544	0.237157	0.220652	0.208013	0.200222	0.198263	0.203119	0.214408	0.204828
0.309762	0.31564	0.323021	0.326452	0.327189	0.328765	0.336584	0.346151	0.361372	0.551222	0.8171	0.817509	0.817918	0.808276	0.663074	0.567266	0.499582	0.473625	0.454039	0.441196	0.427677	0.386482	0.35764	0.356459	0.351347	0.345988	0.32761	0.309458	0.305104	0.308625	0.300931	0.301117	0.308161	0.316243	0.321234	0.325196	0.325392	0.328447	0.331504	0.333347	0.335191	0.360798	0.513513	0.745755	0.858688	0.864181	0.86461	0.86504	0.844692	0.826956
0.226628	0.226764	0.220582	0.204082	0.202546	0.198346	0.198472	0.198598	0.193325	0.19345	0.188971	0.173279	0.158442	0.158554	0.158666	0.182302	0.217989	0.261059	0.29854	0.309277	0.356579	0.397216	0.47574	0.661695	0.867163	1.02804	1.08208	1.08253	1.08298	1.02365	0.886924	0.698947	0.454818	0.254841	0.129416	0.0576201	0.0576951	0.0577701	0.0945743	0.115562	0.131507	0.135252	0.163162	0.174483	0.174601	0.179178	0.168618	0.164271	0.164385	0.166799
0.21803	0.160018	0.111417	0.0990383	0.0991366	0.099235	0.147492	0.246459	0.302529	0.307935	0.309548	0.315021	0.320142	0.328595	0.442444	0.648269	0.69608	0.696437	0.696794	0.576283	0.477897	0.428435	0.390919	0.368051	0.350296	0.324941	0.309721	0.309014	0.308007	0.308196	0.309762	0.31564	0.323021	0.326452	0.327189	0.328765	0.336584	0.346151	0.361372	0.551222	0.8171	0.817509	0.817918	0.808276	0.663074	0.567266	0.499582	0.473625	0.454039	0.441196
0.092215	0.106848	0.0986394	0.0907099	0.091673	0.0926361	0.101752	0.111863	0.141866	0.178466	0.213251	0.244371	0.271459	0.281491	0.289768	0.265535	0.241301	0.220092	0.199176	0.190916	0.186406	0.18598	0.187938	0.190705	0.194309	0.197049	0.198195	0.198681	0.196707	0.194743	0.192907	0.19107	0.192943	0.195088	0.194844	0.192131	0.191011	0.192838	0.19396	0.192415	0.190991	0.191123	0.191256	0.191141	0.191008	0.191659	0.192517	0.194496	0.197074	0.199884
0.0809761	0.0787198	0.0783449	0.0805328	0.085965	0.0761359	0.0963166	0.109711	0.117716	0.121729	0.123146	0.123365	0.123782	0.125794	0.130797	0.102998	0.190112	0.228091	0.232622	0.219392	0.20409	0.202401	0.230014	0.302616	0.435893	0.767085	0.785576	0.759137	0.69889	0.615959	0.521468	0.42654	0.342298	0.279865	0.250364	0.229858	0.200163	0.173504	0.152219	0.138642	0.135109	0.143956	0.167518	0.208131	0.268131	0.30449	0.267431	0.23677	0.211374	0.190111
0.179919	0.193024	0.203671	0.208683	0.214123	0.220839	0.227843	0.238104	0.244768	0.24981	0.258891	0.265714	0.271338	0.274346	0.279908	0.280085	0.285654	0.285833	0.286012	0.291591	0.297317	0.303687	0.313336	0.313527	0.313718	0.308781	0.300418	0.285133	0.256069	0.242464	0.242624	0.242785	0.242945	0.255329	0.255495	0.275406	0.287819	0.295231	0.295415	0.298106	0.298291	0.316551	0.340495	0.390376	0.434626	0.44615	0.552138	0.631753	0.634312	0.634643
0.759137	0.69889	0.615959	0.521468	0.42654	0.342298	0.279865	0.250364	0.229858	0.200163	0.173504	0.152219	0.138642	0.135109	0.143956	0.167518	0.208131	0.268131	0.30449	0.267431	0.23677	0.211374	0.190111	0.171847	0.15545	0.139787	0.123725	0.10613	0.146252	0.0453106	0.111925	0.292016	0.531508	0.776321	0.972378	1.0656	1.00191	0.727235	0.679827	0.59829	0.522278	0.452372	0.389156	0.333213	0.285126	0.245477	0.214849	0.193826	0.132017	0.165834
0.136344	0.141828	0.150631	0.163579	0.173936	0.171102	0.167578	0.16368	0.159721	0.156016	0.152878	0.150621	0.149561	0.15001	0.151448	0.156754	0.158432	0.157774	0.156069	0.154606	0.154676	0.157568	0.164572	0.176977	0.186996	0.214937	0.232576	0.241774	0.244393	0.242293	0.237337	0.231384	0.226297	0.223936	0.223786	0.232157	0.235404	0.234349	0.229813	0.222617	0.213582	0.20353	0.193281	0.183656	0.173801	0.172873	0.169984	0.165535	0.159926	0.153559
0.104382	0.0939867	0.0904067	0.0882967	0.0901855	0.094344	0.113828	0.133311	0.154879	0.17647	0.200622	0.225304	0.235657	0.239536	0.244323	0.249855	0.247723	0.234526	0.218165	0.192263	0.166495	0.141813	0.11713	0.103643	0.0905114	0.088529	0.0888463	0.0865974	0.0830799	0.099486	0.133603	0.167146	0.199789	0.229693	0.251356	0.268997	0.253829	0.23866	0.215268	0.191615	0.171577	0.15228	0.133148	0.11409	0.0987709	0.0865211	0.0772458	0.0722543	0.0687795	0.0694093
0.124605	0.12747	0.129316	0.128793	0.122498	0.109548	0.0987864	0.0904245	0.0846745	0.0817484	0.081858	0.0852154	0.0920326	0.102521	0.0971249	0.111108	0.123993	0.135759	0.146386	0.155854	0.164141	0.171226	0.17709	0.181711	0.173219	0.190706	0.205062	0.216166	0.223897	0.228135	0.22876	0.225651	0.218687	0.207748	0.214593	0.203376	0.198463	0.198336	0.201477	0.206366	0.211487	0.21532	0.216348	0.213052	0.0978173	0.268688	0.405389	0.50799	0.576561	0.611172
0.0478178	0.0536712	0.0625215	0.0762569	0.0955993	0.113298	0.127268	0.138305	0.134514	0.130501	0.118168	0.105836	0.0929234	0.079936	0.0764812	0.076279	0.0739009	0.0701092	0.0654885	0.0599195	0.0552636	0.0524936	0.0491232	0.0431286	0.0373555	0.0361367	0.0349179	0.0310255	0.0268563	0.0254451	0.0248745	0.0264959	0.0294271	0.0307015	0.030228	0.0297546	0.0304454	0.0314907	0.030643	0.0285668	0.0274442	0.0275199	0.0290419	0.0338378	0.0389376	0.0455575	0.0522563	0.0618189	0.0713815	0.0820749
0.200054	0.227361	0.230864	0.234368	0.233967	0.233038	0.231342	0.229378	0.237056	0.251689	0.268067	0.286658	0.302332	0.310533	0.317365	0.315835	0.314295	0.303937	0.293579	0.284179	0.274933	0.263661	0.251605	0.249331	0.254107	0.259934	0.267204	0.274434	0.279814	0.285194	0.308426	0.334064	0.359729	0.385404	0.411889	0.438912	0.463431	0.485028	0.508838	0.537321	0.563614	0.580025	0.595579	0.591184	0.586788	0.58985	0.593726	0.652237	0.729784	0.853169
0.339097	0.306617	0.268772	0.238603	0.21929	0.219237	0.219371	0.219505	0.228478	0.23808	0.264383	0.320803	0.386926	0.452785	0.497108	0.508014	0.508253	0.508493	0.503297	0.495535	0.491393	0.484184	0.436615	0.350021	0.290473	0.249233	0.214416	0.205773	0.204334	0.204463	0.204591	0.216081	0.27009	0.332115	0.350074	0.35497	0.35987	0.360055	0.36024	0.384473	0.443802	0.630557	0.860366	0.860733	0.861101	0.833267	0.675841	0.600819	0.51829	0.406763
0.0564803	0.0565548	0.0691798	0.203777	0.458409	0.568462	0.568723	0.568985	0.529025	0.480877	0.481107	0.481336	0.498314	0.730073	0.919058	0.919447	0.919837	0.785089	0.560837	0.376179	0.246084	0.246228	0.246371	0.280634	0.377275	0.406325	0.407849	0.423779	0.423987	0.424196	0.374454	0.20418	0.189599	0.189722	0.189845	0.28014	0.39012	0.565065	0.679211	0.680072	0.680374	0.680676	0.553981	0.433913	0.3557	0.30503	0.284033	0.274236	0.2462	0.198642
NaN	NaN	NaN	NaN	NaN	NaN	NaN	NaN	NaN	NaN	NaN	NaN	NaN	NaN	NaN	NaN	NaN	NaN	NaN	NaN	NaN	NaN	NaN	NaN	NaN	NaN	NaN	NaN	NaN	NaN	NaN	NaN	NaN	NaN	NaN	NaN	NaN	NaN	NaN	NaN	NaN	NaN	NaN	NaN	NaN	NaN	NaN	NaN	NaN	NaN
0.199122	0.196968	0.191764	0.172024	0.152348	0.13453	0.116711	0.105382	0.0948264	0.0988103	0.107558	0.1236	0.144239	0.164373	0.182106	0.19918	0.197106	0.195032	0.177105	0.157294	0.144003	0.133082	0.127289	0.125006	0.126617	0.132919	0.14193	0.156861	0.171648	0.185747	0.199406	0.200412	0.201418	0.189389	0.175815	0.165211	0.155579	0.148478	0.146433	0.144603	0.143664	0.143216	0.151386	0.159557	0.16763	0.175695	0.182431	0.188779	0.183922	0.172592
0.184479	0.175202	0.168957	0.162272	0.156248	0.155061	0.157726	0.163256	0.170665	0.178966	0.187174	0.194302	0.199365	0.189472	0.198832	0.20387	0.206014	0.206687	0.207315	0.209324	0.214138	0.223184	0.237886	0.268059	0.247241	0.230682	0.218117	0.20928	0.203908	0.201734	0.202493	0.205921	0.211751	0.217723	0.228995	0.232378	0.229879	0.223511	0.215282	0.207202	0.201282	0.199532	0.203961	0.155759	0.217701	0.219477	0.186142	0.14275	0.114354	0.12601
0.473625	0.454039	0.441196	0.427677	0.386482	0.35764	0.356459	0.351347	0.345988	0.32761	0.309458	0.305104	0.308625	0.300931	0.301117	0.308161	0.316243	0.321234	0.325196	0.325392	0.328447	0.331504	0.333347	0.335191	0.360798	0.513513	0.745755	0.858688	0.864181	0.86461	0.86504	0.844692	0.826956	0.827369	0.827416	0.809281	0.783168	0.733689	0.667126	0.589958	0.47849	0.39792	0.383718	0.383939	0.384161	0.396556	0.40478	0.407595	0.407827	0.408059
Time relative to onset of a reversal (s)
-40	-39.5	-39	-38.5	-38	-37.5	-37	-36.5	-36	-35.5	-35	-34.5	-34	-33.5	-33	-32.5	-32	-31.5	-31	-30.5	-30	-29.5	-29	-28.5	-28	-27.5	-27	-26.5	-26	-25.5	-25	-24.5	-24	-23.5	-23	-22.5	-22	-21.5	-21	-20.5	-20	-19.5	-19	-18.5	-18	-17.5	-17	-16.5	-16	-15.5
0.320142	0.328595	0.442444	0.648269	0.69608	0.696437	0.696794	0.576283	0.477897	0.428435	0.390919	0.368051	0.350296	0.324941	0.309721	0.309014	0.308007	0.308196	0.309762	0.31564	0.323021	0.326452	0.327189	0.328765	0.336584	0.346151	0.361372	0.551222	0.8171	0.817509	0.817918	0.808276	0.663074	0.567266	0.499582	0.473625	0.454039	0.441196	0.427677	0.386482	0.35764	0.356459	0.351347	0.345988	0.32761	0.309458	0.305104	0.308625	0.300931	0.301117
0.191135	0.199444	0.225491	0.225627	0.247944	0.270278	0.310323	0.380684	0.454365	0.480016	0.480245	0.480474	0.441341	0.380852	0.339428	0.298158	0.26806	0.268212	0.268363	0.273409	0.292651	0.322632	0.338742	0.33892	0.339097	0.306617	0.268772	0.238603	0.21929	0.219237	0.219371	0.219505	0.228478	0.23808	0.264383	0.320803	0.386926	0.452785	0.497108	0.508014	0.508253	0.508493	0.503297	0.495535	0.491393	0.484184	0.436615	0.350021	0.290473	0.249233
0.340209	0.30896	0.290275	0.28277	0.282927	0.283084	0.306017	0.361561	0.444934	0.488924	0.489156	0.489388	0.449095	0.363531	0.279126	0.243294	0.243437	0.242296	0.241153	0.240867	0.24058	0.229945	0.208337	0.194251	0.186406	0.155622	0.122975	0.1135	0.112061	0.112156	0.115261	0.120335	0.142319	0.174406	0.191135	0.199444	0.225491	0.225627	0.247944	0.270278	0.310323	0.380684	0.454365	0.480016	0.480245	0.480474	0.441341	0.380852	0.339428	0.298158
0.427503	0.500995	0.61768	0.661524	0.661819	0.662114	0.578808	0.476021	0.418307	0.382792	0.358751	0.347362	0.339048	0.329905	0.324389	0.321681	0.303054	0.265196	0.236305	0.222159	0.217828	0.19741	0.14308	0.109208	0.106274	0.0842028	0.0583281	0.0564057	0.0564803	0.0565548	0.0691798	0.203777	0.458409	0.568462	0.568723	0.568985	0.529025	0.480877	0.481107	0.481336	0.498314	0.730073	0.919058	0.919447	0.919837	0.785089	0.560837	0.376179	0.246084	0.246228
0.179588	0.1929	0.196754	0.205706	0.255362	0.271019	0.273614	0.296547	0.296709	0.287739	0.265094	0.266828	0.266979	0.255032	0.255179	0.255326	0.255473	0.252086	0.252232	0.252378	0.259816	0.293982	0.35274	0.380532	0.381448	0.381641	0.381834	0.382027	0.389172	0.405811	0.425722	0.425932	0.426141	0.397914	0.309072	0.255301	0.255448	0.255595	0.256832	0.270284	0.294873	0.322026	0.336753	0.340279	0.340457	0.337284	0.322446	0.291411	0.264219	0.256562
NaN	NaN	NaN	NaN	NaN	NaN	NaN	NaN	NaN	NaN	NaN	NaN	NaN	NaN	NaN	NaN	NaN	NaN	NaN	NaN	NaN	NaN	NaN	NaN	NaN	NaN	NaN	NaN	NaN	NaN	NaN	NaN	NaN	NaN	NaN	NaN	NaN	NaN	NaN	NaN	NaN	NaN	NaN	NaN	NaN	NaN	NaN	NaN	NaN	NaN
0.158442	0.158554	0.158666	0.182302	0.217989	0.261059	0.29854	0.309277	0.356579	0.397216	0.47574	0.661695	0.867163	1.02804	1.08208	1.08253	1.08298	1.02365	0.886924	0.698947	0.454818	0.254841	0.129416	0.0576201	0.0576951	0.0577701	0.0945743	0.115562	0.131507	0.135252	0.163162	0.174483	0.174601	0.179178	0.168618	0.164271	0.164385	0.166799	0.16908	0.170888	0.17744	0.217674	0.302405	0.358921	0.382238	0.41073	0.426004	0.432937	0.448977	0.460137
0.522278	0.452372	0.389156	0.333213	0.285126	0.245477	0.214849	0.193826	0.132017	0.165834	0.158434	0.127609	0.0911511	0.0668519	0.0725038	0.125899	0.244829	0.447087	1.03351	0.934082	0.837277	0.744141	0.65572	0.573061	0.49721	0.429213	0.370118	0.320971	0.273364	0.236991	0.205144	0.177612	0.154184	0.134647	0.118789	0.1064	0.0972659	0.0911765	0.000625617	0.0792034	0.130542	0.16632	0.198216	0.237909	0.297077	0.387399	0.520553	0.708218	1.2577	1.09884
0.298106	0.298291	0.316551	0.340495	0.390376	0.434626	0.44615	0.552138	0.631753	0.634312	0.634643	0.622012	0.622336	0.621076	0.6214	0.614151	0.594988	0.503398	0.410139	0.377062	0.334124	0.309374	0.309564	0.296724	0.262946	0.263116	0.263285	0.316022	0.454329	0.519168	0.52758	0.543843	0.57894	0.710826	0.824281	0.833133	0.83355	0.833966	0.750091	0.554483	0.405153	0.345056	0.322856	0.315458	0.323247	0.323442	0.281017	0.238554	0.238713	0.259441
0.0638734	0.0610909	0.0619459	0.064288	0.0642832	0.0625051	0.0580673	0.0501037	0.0412161	0.0300641	0.0204893	0.019851	0.0194993	0.0475063	0.0755134	0.101516	0.12722	0.15008	0.17189	0.20916	0.257164	0.34063	0.467436	0.572588	0.629585	0.686583	0.737712	0.741361	0.745009	0.664543	0.581493	0.511535	0.44425	0.385458	0.330473	0.277317	0.225654	0.179679	0.141876	0.109266	0.0906538	0.0740002	0.0703836	0.0667671	0.0681397	0.0695606	0.0595349	0.0471747	0.0320546	0.0157003
0.156315	0.149327	0.280687	0.0960189	0.0606933	0.135462	0.281077	0.458289	0.627851	0.750514	0.78703	0.698151	0.574918	0.497107	0.433674	0.382441	0.34123	0.307865	0.280168	0.255963	0.233071	0.209316	0.192121	0.168967	0.149442	0.133506	0.12112	0.112245	0.106843	0.104874	0.106299	0.111079	0.113328	0.132815	0.143335	0.146694	0.144694	0.13914	0.131836	0.124586	0.119194	0.117463	0.116969	0.116213	0.11459	0.112413	0.110001	0.107668	0.105731	0.104506
NaN	NaN	NaN	NaN	NaN	NaN	NaN	NaN	NaN	NaN	NaN	NaN	NaN	NaN	NaN	NaN	NaN	NaN	NaN	NaN	NaN	NaN	NaN	-0.0138167	-0.0137677	0.00568373	0.00568025	0.00579587	0.00585197	0.0059081	0.00858776	0.0138938	0.0165783	0.0241593	0.0322236	0.0457295	0.0674318	0.109833	0.213739	0.31455	0.351522	0.367748	0.377698	0.377889	0.379459	0.388405	0.398976	0.407095	0.421041	0.439981
0.110973	0.113925	0.11763	0.11942	0.119966	0.123098	0.129184	0.135422	0.141973	0.148417	0.15432	0.160043	0.159291	0.158539	0.155423	0.152007	0.160902	0.173961	0.182434	0.187943	0.192132	0.194814	0.196809	0.184909	0.173009	0.162631	0.152409	0.145535	0.139677	0.134585	0.129949	0.130913	0.137764	0.144111	0.149513	0.154312	0.156812	0.158617	0.15088	0.143144	0.141406	0.140138	0.143726	0.148622	0.160944	0.1773	0.194537	0.215133	0.234589	0.238329
0.288578	0.288737	0.288896	0.271386	0.229247	0.204115	0.197554	0.197294	0.186027	0.186149	0.186271	0.193352	0.216489	0.228875	0.246816	0.257673	0.260532	0.272757	0.278402	0.278558	0.278713	0.266387	0.258451	0.237111	0.195038	0.142766	0.0760718	0.0680516	0.0681304	0.0682092	0.111762	0.135289	0.13799	0.138094	0.138198	0.127512	0.120589	0.108262	0.108356	0.1091	0.12007	0.169614	0.208572	0.224283	0.227288	0.235124	0.235263	0.235403	0.227836	0.184328
0.116552	0.116658	0.116763	0.101979	0.0939528	0.0940489	0.094145	0.11526	0.15118	0.201586	0.237235	0.237393	0.247472	0.252393	0.257726	0.252722	0.240771	0.240931	0.228964	0.223939	0.224092	0.224244	0.224397	0.25336	0.374558	0.512943	0.55916	0.559458	0.559755	0.564502	0.569254	0.559896	0.550529	0.540332	0.503441	0.462057	0.404776	0.370938	0.371154	0.37137	0.383484	0.383706	0.383928	0.384011	0.301764	0.148313	0.0665124	0.0604569	0.0605385	0.0606201
0.281491	0.289768	0.265535	0.241301	0.220092	0.199176	0.190916	0.186406	0.18598	0.187938	0.190705	0.194309	0.197049	0.198195	0.198681	0.196707	0.194743	0.192907	0.19107	0.192943	0.195088	0.194844	0.192131	0.191011	0.192838	0.19396	0.192415	0.190991	0.191123	0.191256	0.191141	0.191008	0.191659	0.192517	0.194496	0.197074	0.199884	0.202917	0.204691	0.204148	0.203786	0.204096	0.204134	0.200679	0.197224	0.1949	0.193178	0.19169	0.190423	0.190305
NaN	NaN	NaN	NaN	NaN	NaN	NaN	NaN	NaN	NaN	NaN	NaN	NaN	NaN	NaN	NaN	NaN	NaN	NaN	NaN	NaN	NaN	NaN	NaN	NaN	NaN	NaN	NaN	NaN	NaN	NaN	NaN	NaN	NaN	NaN	NaN	NaN	NaN	NaN	NaN	NaN	NaN	NaN	NaN	NaN	NaN	NaN	NaN	NaN	NaN
NaN	NaN	NaN	NaN	NaN	NaN	NaN	NaN	NaN	NaN	NaN	NaN	NaN	NaN	NaN	NaN	NaN	NaN	NaN	NaN	NaN	NaN	NaN	NaN	NaN	NaN	NaN	NaN	NaN	NaN	NaN	NaN	NaN	NaN	NaN	NaN	NaN	NaN	NaN	NaN	NaN	NaN	NaN	NaN	NaN	NaN	NaN	NaN	NaN	NaN
0.355284	0.301513	0.259031	0.225946	0.200366	0.180402	0.164161	0.149752	0.135285	0.121871	0.126735	0.129558	0.13127	0.132801	0.135081	0.139039	0.145605	0.155709	0.17028	0.189801	0.20515	0.211696	0.211566	0.206889	0.199792	0.192403	0.186852	0.185265	0.189771	0.0572172	0.4408	0.668294	0.769079	0.772536	0.708043	0.604982	0.49273	0.400668	0.358177	0.328862	0.300543	0.272988	0.246564	0.221641	0.198587	0.177771	0.159562	0.144328	0.132438	0.1154
0.177108	0.189076	0.199833	0.208169	0.212876	0.163739	0.46167	0.637075	0.712796	0.711674	0.65655	0.570265	0.475661	0.395579	0.352859	0.315945	0.276199	0.244288	0.219605	0.201537	0.189477	0.182814	0.180938	0.183241	0.18911	0.203087	0.214859	0.225609	0.234695	0.241477	0.245316	0.245569	0.241598	0.232762	0.218421	0.205283	0.192319	0.176679	0.15975	0.142915	0.127558	0.115066	0.106821	0.104208	0.108613	0.111237	0.104493	0.101887	0.102514	0.105473
0.153559	0.146834	0.140154	0.133919	0.12853	0.122631	0.131968	0.135911	0.135677	0.132486	0.127554	0.1221	0.117342	0.114499	0.114787	0.131873	0.12767	0.126059	0.127044	0.130629	0.136817	0.145612	0.157017	0.171036	0.187673	0.21408	0.207731	0.198144	0.196105	0.212401	0.257818	0.343141	0.479157	0.676652	0.946412	0.909437	0.70682	0.577224	0.509943	0.494268	0.519494	0.574914	0.64982	0.733507	0.815268	0.796611	0.684821	0.59278	0.517745	0.456968
0.212902	0.172181	0.14582	0.146857	0.18833	0.28328	0.764216	0.687183	0.666092	0.687244	0.73694	0.801481	0.867168	0.920302	0.947184	0.934115	0.759719	0.723272	0.666512	0.6026	0.544699	0.505968	0.499571	0.538668	0.636421	0.80599	1.00613	0.898912	0.79796	0.704207	0.618585	0.542029	0.475471	0.419845	0.376085	0.345123	0.318603	0.282196	0.252789	0.237635	0.243987	0.2791	0.350227	0.464622	0.62954	0.852233	0.752561	0.668049	0.590014	0.518675
0.677688	0.696628	0.692004	0.684832	0.660231	0.630198	0.621148	0.624817	0.621824	0.611683	0.603366	0.598551	0.590743	0.569532	0.54832	0.530371	0.516878	0.500343	0.476089	0.450415	0.416212	0.382001	0.34294	0.303878	0.269382	0.235612	0.230117	0.235476	0.241143	0.247029	0.254052	0.262505	0.265196	0.254633	0.248107	0.265809	0.283508	0.299893	0.316278	0.330661	0.34393	0.358656	0.374819	0.390548	0.405514	0.42096	0.438075	0.452292	0.434488	0.416685
[truncated: 271 more columns]

## Sheet: Fig 3-S2
animal #1 (shown in A)								animal #2								animal #3								animal #3
Time (s)	AIY activity (dR/R0)	AVA	RME	SMDD	SMDV	RIM		Time (s)	AIY activity (dR/R0)	AVA	RME	SMDD	SMDV	RIM		Time (s)	AIY activity (dR/R0)	AVA	RME	SMDD	SMDV	RIM		Time (s)	AIY activity (dR/R0)	AVA	RME	SMDD	SMDV	RIM
0.007	4.04939	0.151698	1.68643	-0.0199701	0.947042	0.278193		0.4759	0.182524	2.27136	0.50701	0.719877	0.749214	4.3672		0.5	-0.165536	-0.124069	0.403255	-0.0407536	0.160003	-0.322981		0.5	-0.093288	-0.139818	0.329417	-0.261156	-0.027694	-0.348546
0.507	3.46142	0.117164	1.59886	-0.0200202	0.887619	0.26802		0.9759	0.173611	2.21587	0.432267	0.695666	0.911987	4.2388		1	-0.165174	-0.123683	0.402215	-0.0405882	0.159329	-0.322008		1	-0.0929575	-0.139382	0.328628	-0.261562	-0.0276774	-0.347671
1.007	3.00598	0.0921399	1.51983	-0.0165122	0.830654	0.258013		1.4759	0.164698	2.16039	0.357525	0.671455	1.07476	4.11039		1.5	1.53904	3.97654	0.691585	2.86008	1.68523	5.69516		1.5	0.0383757	5.07177	2.44313	2.06914	0.335558	5.22692
1.507	2.66058	0.074928	1.44872	-0.010799	0.776534	0.248435		1.9759	0.155751	2.10474	0.316428	0.642918	1.32375	3.99249		2	1.55055	4.00127	0.694568	2.85488	1.64305	5.73242		2	0.0383522	5.25083	2.36388	2.06374	0.333758	5.36068
2.007	2.40273	0.0638296	1.38493	-0.00423384	0.725646	0.239549		2.4759	0.146801	2.04907	0.279971	0.613783	1.58463	3.87603		2.5	1.56207	4.02601	0.697545	2.86141	1.60092	5.71441		2.5	0.0391328	5.43007	2.28472	2.05836	0.335603	5.49478
2.507	2.20992	0.0571464	1.32785	0.00183038	0.678378	0.231617		2.9759	0.13948	1.98657	0.24075	0.589315	1.94091	3.75785		3	1.5736	4.05077	0.696286	2.85621	1.55883	5.75178		3	0.0395116	5.60949	2.20565	2.05298	0.335626	5.62923
3.007	2.05965	0.0531798	1.27686	0.00604058	0.635117	0.224903		3.4759	0.132677	1.92189	0.200651	0.56633	2.32748	3.63911		3.5	1.58514	4.07556	0.695028	2.85101	1.5168	5.78923		3.5	0.0398906	5.78909	2.12668	2.0476	0.335649	5.76404
3.507	1.92944	0.0502317	1.23135	0.00704373	0.596249	0.219669		3.9759	0.1371	1.8684	0.169847	0.547784	2.64435	3.53018		4	1.62978	4.05523	0.693772	2.85167	1.50538	5.79899		4	0.0579832	5.93949	2.03529	2.04469	0.344289	5.77654
4.007	1.79677	0.0466037	1.19071	0.00348679	0.562163	0.216177		4.4759	0.147854	1.82122	0.144285	0.531742	2.92191	3.42678		4.5	1.71802	4.05746	0.692516	2.84647	1.48971	5.83659		4.5	0.0938089	6.23705	1.85452	2.04055	0.361546	5.78906
4.507	1.63916	0.0405973	1.15433	-0.00598328	0.533246	0.214691		4.9759	0.159174	1.77363	0.11819	0.516889	3.18188	3.32301		5	1.82039	4.05969	0.691261	2.82073	1.48116	5.88451		5	0.111934	6.4309	1.75636	2.00564	0.384108	5.79817
5.007	1.42501	0.0457198	1.12127	-0.0296156	0.509742	0.207799		5.4759	0.175606	1.7224	0.087274	0.512786	3.28281	3.21596		5.5	1.94555	3.99614	0.688251	2.77632	1.47688	5.9171		5.5	0.16312	6.61338	1.66379	1.82583	0.421751	5.81073
5.507	1.34144	0.0293371	1.11452	-0.0181347	0.471562	0.220751		5.9759	0.192038	1.67117	0.056358	0.508683	3.38374	3.1089		6	1.9918	3.88742	0.676471	2.72036	1.47544	5.95539		6	0.217569	6.84505	1.49175	1.63337	0.471162	5.82524
6.007	1.24914	0.0144951	1.11447	-0.0106767	0.446001	0.226865		6.4759	0.217239	1.63312	0.196251	0.507189	3.23483	3.01604		6.5	1.99309	3.78769	0.665058	2.65537	1.474	5.9813		6.5	0.308759	6.94331	1.424	1.50012	0.537147	5.83633
6.507	1.15407	0.00172299	1.1186	-0.00624588	0.430132	0.227856		6.9759	0.242809	1.59562	0.343336	0.505805	3.0754	2.92377		7	1.99439	3.74085	0.663824	2.61447	1.47398	6.0121		7	0.455289	7.01682	1.42256	1.41179	0.605124	5.88525
7.007	1.06223	-0.0084497	1.12441	-0.0038468	0.421027	0.225438		7.4759	0.266433	1.54903	0.522752	0.501382	2.83524	2.84035		7.5	1.91837	3.70243	0.66259	2.59433	1.47644	6.02218		7.5	0.741575	7.23851	1.42112	1.40596	0.647745	5.9774
7.507	0.979569	-0.0154936	1.1294	-0.00248386	0.415756	0.221326		7.9759	0.289569	1.50016	0.710272	0.496197	2.57484	2.75915		8	1.81681	3.63508	0.661707	2.52592	1.48667	6.03227		8	1.44313	7.47918	1.57612	1.40014	0.720201	5.98676
8.007	0.912083	-0.0188793	1.13106	-0.00116147	0.411394	0.217234		8.4759	0.306551	1.45213	0.893021	0.493735	2.34015	2.67485		8.5	1.76022	3.62346	0.662224	2.4086	1.50256	5.9968		8.5	2.12379	7.48348	1.83244	1.39787	0.819012	5.99614
8.507	0.865743	-0.0180774	1.12688	0.00111592	0.405011	0.214878		8.9759	0.320354	1.40453	1.07331	0.49268	2.11873	2.58895		9	1.76141	3.58938	0.670774	2.31748	1.51559	5.9535		9	2.37342	7.48778	1.95242	1.37912	0.858159	5.98001
9.007	0.846525	-0.0125586	1.11435	0.0053439	0.393679	0.215972		9.4759	0.324708	1.36341	1.16831	0.492557	1.92742	2.5292		9.5	1.75168	3.58537	0.679311	2.27627	1.52826	5.91108		9.5	2.48298	7.48279	1.95067	1.36134	0.858191	5.89921
9.507	0.860406	-0.00179331	1.09098	0.012518	0.374471	0.22223		9.9759	0.320325	1.32827	1.18446	0.493294	1.76396	2.49363		10	1.75287	3.58739	0.678066	2.27306	1.55608	5.8905		10	2.55016	7.29995	1.95047	1.33229	0.858222	5.85297
10.007	0.863474	0.0115695	1.04854	0.0382127	0.357734	0.22852		10.4759	0.31885	1.30761	1.18355	0.494551	1.62334	2.48239		10.5	1.77503	3.58941	0.676822	2.27362	1.5994	5.89367		10.5	2.55145	7.20314	1.95376	1.26696	0.848806	5.84211
10.507	0.852537	0.0131822	1.04326	0.0298152	0.352701	0.223074		10.9759	0.322124	1.3106	1.15475	0.496655	1.52006	2.51093		11	1.80497	3.59144	0.671747	2.28217	1.64972	5.90358		11	2.56205	7.17643	1.9555	1.21774	0.844528	5.8513
11.007	0.854929	0.0136253	1.03019	0.0243197	0.343896	0.219214		11.4759	0.325399	1.31358	1.12595	0.498759	1.41677	2.53947		11.5	1.86734	3.5838	0.666678	2.26572	1.73346	5.89184		11.5	2.62245	7.08285	1.95026	1.19954	0.844559	5.86049
11.507	0.86431	0.0131733	1.01124	0.021045	0.332149	0.216698		11.9759	0.350436	1.33954	1.092	0.500361	1.31454	2.6022		12	1.93387	3.50968	0.665443	2.26628	1.78857	5.88783		12	2.69382	6.93414	1.95199	1.17335	0.844591	5.91613
12.007	0.874338	0.0121007	0.9883	0.0193096	0.318289	0.215282		12.4759	0.391257	1.38216	1.05431	0.501599	1.21306	2.68974		12.5	1.98173	3.36739	0.660385	2.24394	1.84784	5.88974		12.5	2.74864	6.78019	1.95024	1.15248	0.85407	5.95762
12.507	0.87867	0.010682	0.963285	0.0184323	0.303146	0.214724		12.9759	0.427713	1.43619	1.02352	0.50923	1.1153	2.78517		13	2.01958	3.28832	0.650123	2.13711	1.94398	5.89615		13	2.8428	6.58669	1.95004	1.12906	0.871839	5.96921
13.007	0.870967	0.00919151	0.938097	0.0177315	0.287547	0.214782		13.4759	0.458606	1.50478	1.00151	0.525005	1.02228	2.89064		13.5	2.02271	3.29021	0.646123	2.01216	1.97918	5.90605		13.5	2.97068	6.43389	1.94984	1.10526	0.903367	5.97856
13.507	0.844885	0.00790387	0.91464	0.016526	0.272322	0.215212		13.9759	0.480641	1.57236	0.9784	0.544075	0.937857	2.98914		14	2.02402	3.2921	0.644903	1.92564	1.99959	5.89972		14	3.05648	6.38867	1.96547	1.1041	0.947827	5.98568
14.007	0.794085	0.00709352	0.894818	0.0141344	0.258301	0.215773		14.4759	0.481985	1.63761	0.952699	0.570839	0.873515	3.07137		14.5	2.02533	3.30272	0.639871	1.89713	2.03542	5.86739		14.5	3.0965	6.33746	1.98109	1.10254	0.972063	5.9814
14.507	0.712223	0.00703494	0.880535	0.00987534	0.246312	0.21622		14.9759	0.474144	1.70012	0.92831	0.5954	0.810397	3.15215		15	2.01657	3.40822	0.633807	1.89763	2.0698	5.84692		15	3.10327	6.3382	1.97932	1.09962	0.998124	5.91887
15.007	0.63574	-0.00610679	0.884623	0.00936133	0.25397	0.210924		15.4759	0.409788	1.74575	0.911995	0.606413	0.754811	3.22404		15.5	1.96155	3.57625	0.615294	1.89813	2.10519	5.84911		15.5	3.10476	6.29817	1.99183	1.10023	1.02419	5.83738
15.507	0.604954	-0.0148834	0.879701	0.0210089	0.267785	0.209434		15.9759	0.345432	1.79138	0.895681	0.617425	0.699224	3.29594		16	1.96283	3.63773	0.588163	1.87065	2.11986	5.85895		16	3.10626	6.29379	1.99005	1.10029	1.02422	5.84656
16.007	0.572335	-0.0193576	0.894773	0.0293136	0.273068	0.207302		16.4759	0.29117	1.83013	0.886523	0.6	0.678828	3.34195		16.5	1.94395	3.6547	0.569019	1.81096	2.13767	5.86881		16.5	3.05697	6.28621	1.98828	1.10035	1.02425	5.85575
16.507	0.53919	-0.0200116	0.925689	0.0353553	0.272161	0.204371		16.9759	0.236908	1.86888	0.877365	0.582575	0.658431	3.38796		17	1.94522	3.65676	0.559224	1.72411	2.14915	5.87867		17	3.01049	6.27055	1.95455	1.09623	1.0087	5.9232
17.007	0.50683	-0.0173276	0.968302	0.0402138	0.267406	0.200486		17.4759	0.183139	1.90863	0.875286	0.561637	0.655614	3.43109		17.5	1.97265	3.64387	0.546337	1.6067	2.14732	5.89396		17.5	2.85421	6.0165	1.70615	1.09508	0.993154	6.04434
17.507	0.47656	-0.0117879	1.01846	0.0449693	0.261146	0.19549		17.9759	0.129449	1.94854	0.87436	0.540128	0.655658	3.47374		18	1.97393	3.59008	0.523816	1.52947	2.14549	5.90928		18	2.43101	5.62316	1.26462	1.09689	0.993188	6.0538
18.007	0.449691	-0.00387471	1.07202	0.0507015	0.255721	0.189227		18.4759	0.0925207	1.99178	0.870033	0.541485	0.642053	3.51916		18.5	1.97522	3.5512	0.505806	1.49327	2.13737	5.92463		18.5	2.15234	5.62651	1.02384	1.09574	0.993222	6.06326
18.507	0.42753	0.00592967	1.12483	0.0584905	0.253475	0.181541		18.9759	0.062104	2.03633	0.864385	0.551725	0.623146	3.56564		19	1.91174	3.54893	0.504345	1.41662	2.12646	5.97111		19	1.81242	5.62987	1.02264	1.09742	1.042	5.91542
19.007	0.411386	0.017143	1.17274	0.0694162	0.25675	0.172277		19.4759	0.0388324	2.06977	0.861417	0.585915	0.588021	3.60818		19.5	1.79812	3.54666	0.499102	1.32415	2.11557	6.04426		19.5	1.47225	5.65135	1.01645	1.10933	1.16307	5.74618
19.507	0.402567	0.0292831	1.2116	0.0845584	0.267887	0.161277		19.9759	0.0207348	2.09517	0.860389	0.637446	0.541153	3.64788		20	1.74922	3.50963	0.497991	1.27125	2.11376	6.09102		20	1.34281	6.01018	1.01027	1.13401	1.27652	5.69751
20.007	0.394936	0.043715	1.24046	0.106493	0.283507	0.159229		20.4759	0.00926031	2.11748	0.860952	0.718421	0.488691	3.6818		20.5	1.75041	3.44325	0.500315	1.23224	2.07951	6.10582		20.5	1.10938	6.52649	0.993357	1.23048	1.33476	5.59433
20.507	0.340582	0.0330989	1.26506	0.178591	0.26728	0.151375		20.9759	0.00693197	2.1355	0.86371	0.840057	0.428505	3.70777		21	1.7516	3.40078	0.502635	1.19216	2.03555	6.12422		21	1.11015	6.97005	0.964202	1.38048	1.35635	5.59501
21.007	0.31034	0.0277883	1.28643	0.244209	0.254967	0.146368		21.4759	0.0079521	2.15586	0.861889	0.972727	0.373465	3.73239		21.5	1.7666	3.37381	0.501521	1.16239	2.00453	6.14855		21.5	1.11092	7.0991	0.921295	1.44836	1.3806	5.57001
21.507	0.300964	0.0268206	1.30455	0.304121	0.245804	0.143658		21.9759	0.0175741	2.18218	0.848303	1.13374	0.331644	3.75353		22	1.82491	3.35731	0.500407	1.14949	1.98329	6.14471		22	1.12393	7.1032	0.872696	1.44701	1.50633	5.57882
22.007	0.309207	0.0292331	1.31944	0.3591	0.239028	0.142693		22.4759	0.024878	2.20752	0.834048	1.2925	0.29316	3.776		22.5	1.88096	3.3469	0.499295	1.13952	1.97425	6.15497		22.5	1.38626	7.1073	0.871585	1.49076	1.87201	5.60017
22.507	0.331822	0.0340631	1.3311	0.409923	0.233873	0.142922		22.9759	0.0179661	2.22687	0.81569	1.43741	0.275139	3.80652		23	1.89373	3.3382	0.498183	1.12534	1.96522	6.1794		23	1.95125	6.92329	0.870475	1.53446	2.26954	5.60903
23.007	0.365562	0.040348	1.33953	0.457363	0.229577	0.143794		23.4759	0.0110543	2.24621	0.797333	1.58232	0.257119	3.83704		23.5	1.89498	3.32917	0.497756	1.10082	1.95759	6.17005		23.5	2.73553	6.65966	0.87395	1.53307	2.40308	5.61977
23.507	0.40718	0.0471251	1.34475	0.502194	0.225375	0.144757		23.9759	0.0214676	2.26333	0.77716	1.71499	0.238338	3.8605		24	1.8847	3.30629	0.497329	1.08979	1.93954	6.16659		24	3.165	6.47095	0.959512	1.5779	2.40314	5.62678
24.007	0.453429	0.0534317	1.34674	0.545191	0.220503	0.14526		24.4759	0.0392919	2.27951	0.756211	1.84241	0.219232	3.88094		24.5	1.70318	3.29144	0.496219	1.07158	1.9184	6.17689		24.5	3.33978	6.24732	1.07741	1.6899	2.4032	5.63568
24.507	0.501063	0.0583051	1.34553	0.587128	0.214197	0.144753		24.9759	0.0690226	2.29131	0.741845	1.96211	0.20434	3.89577		25	1.25001	3.29333	0.49784	1.07194	1.89658	6.18507		25	4.21699	5.67736	1.23063	1.83376	2.32896	5.62503
25.007	0.558669	0.0690367	1.34271	0.635521	0.205227	0.144985		25.4759	0.108093	2.29967	0.732642	2.07573	0.192754	3.90618		25.5	0.870356	3.29522	0.49707	1.08158	1.88137	6.15945		25.5	5.83012	4.70517	1.58034	1.85147	2.13797	5.58781
25.507	0.558296	0.0648438	1.33787	0.695465	0.187899	0.135927		25.9759	0.164554	2.31093	0.726446	2.18824	0.179746	3.92038		26	0.773656	3.29873	0.504818	1.10052	1.87069	6.08731		26	6.63074	4.17141	2.27931	1.8499	1.89789	5.47584
26.007	0.577006	0.0621337	1.33696	0.746207	0.175295	0.12912		26.4759	0.24501	2.3262	0.724399	2.29921	0.164776	3.93981		26.5	0.774424	3.30773	0.50949	1.11651	1.84478	6.02134		26.5	6.63352	4.01531	2.93368	1.84833	1.71468	5.24564
26.507	0.610025	0.0610063	1.33921	0.790106	0.166305	0.123878		26.9759	0.308701	2.3366	0.722901	2.40342	0.152647	3.96036		27	0.775192	3.36537	0.50837	1.16312	1.83171	6.00452		27	6.6363	4.01785	3.13642	1.70909	1.56049	4.95365
27.007	0.652578	0.0615615	1.34383	0.829523	0.15982	0.119511		27.4759	0.329368	2.33451	0.722815	2.49033	0.147807	3.98375		27.5	1.15216	3.46947	0.507252	1.22369	1.82556	6.01458		27.5	6.07516	4.02039	3.13396	1.59683	1.39651	4.83568
27.507	0.69989	0.063899	1.35004	0.866817	0.15473	0.115333		27.9759	0.343914	2.3321	0.72266	2.56773	0.142373	4.00624		28	1.92526	3.5645	0.506135	1.26273	1.82565	6.05229		28	5.11047	4.11779	3.13151	1.52364	1.2914	4.84351
28.007	0.747187	0.0681188	1.35704	0.904348	0.149926	0.110656		28.4759	0.320983	2.32765	0.722083	2.58693	0.1333	4.02312		28.5	2.36326	3.60767	0.505018	1.29122	1.82401	6.06329		28.5	4.23155	4.50345	2.91448	1.46612	1.21034	4.85135
28.507	0.789694	0.0743206	1.36407	0.944477	0.144299	0.104793		28.9759	0.298052	2.3232	0.721505	2.60613	0.124227	4.04001		29	2.40549	3.60971	0.499154	1.33431	1.82064	6.10136		29	3.35978	4.81586	2.47832	1.44851	1.11932	5.04423
29.007	0.822636	0.0826042	1.37033	0.989564	0.13674	0.0970561		29.4759	0.247509	2.32293	0.717173	2.58783	0.116875	4.04155		29.5	2.41809	3.61174	0.50177	1.37339	1.81279	6.11157		29.5	2.68711	5.01829	2.15647	1.4164	1.06346	5.24568
29.507	0.841239	0.0930695	1.37504	1.04197	0.126138	0.0867575		29.9759	0.196414	2.32274	0.712766	2.56877	0.109557	4.04278		30	2.46084	3.60795	0.500657	1.40804	1.80356	6.12179		30	2.29704	5.10971	1.98589	1.34334	1.04874	5.36106
30.007	0.647058	0.101422	1.38071	1.07924	0.133434	0.0753602		30.4759	0.157694	2.32137	0.713307	2.55458	0.103847	4.03743		30.5	2.50085	3.57522	0.51545	1.52031	1.80159	6.10742		30.5	2.08605	5.2079	1.82385	1.275	1.04711	5.43853
30.507	1.82441	0.117887	1.37484	1.12792	0.126806	0.0705255		30.9759	0.12132	2.31978	0.714787	2.5413	0.0984419	4.03084		31	2.56688	3.51352	0.568772	1.80369	1.79996	6.05432		31	1.95989	5.26498	1.68472	1.23094	1.04151	5.46999
31.007	2.51758	0.132199	1.3707	1.17404	0.119015	0.0651705		31.4759	0.147276	2.31094	0.722865	2.54516	0.0957076	4.01183		31.5	3.45623	3.4441	0.711901	2.26399	1.79179	5.98028		31.5	1.90922	5.38191	1.67518	1.19304	1.04154	5.47867
31.507	2.81681	0.144434	1.36829	1.21708	0.110762	0.059497		31.9759	0.199867	2.299	0.733761	2.55635	0.0941147	3.9875		32	5.06407	3.36618	0.867985	2.67876	1.78363	5.88998		32	1.91028	5.60738	1.6736	1.15558	1.04158	5.48737
32.007	2.81238	0.154671	1.36762	1.25649	0.102749	0.0537066		32.4759	0.256859	2.2869	0.743569	2.56478	0.0934685	3.96989		32.5	5.43756	3.30398	0.873349	2.77101	1.68916	5.75752		32.5	1.91134	5.72698	1.67201	1.13807	1.05621	5.35629
32.507	2.59454	0.162985	1.3687	1.29176	0.0956774	0.0480011		32.9759	0.317592	2.27466	0.752451	2.57085	0.0936266	3.95799		33	5.44034	3.30155	0.87196	2.77166	1.48654	5.61271		33	2.06618	5.78227	1.82682	1.1369	1.27952	5.13445
33.007	2.25356	0.169453	1.37153	1.32235	0.0902488	0.0425822		33.4759	0.387735	2.2652	0.76737	2.56505	0.0934008	3.95703		33.5	5.44313	3.29143	0.870572	2.77231	1.34908	5.59109		33.5	2.4412	5.7857	2.04298	1.12962	1.90543	5.03497
33.507	1.87971	0.174153	1.37611	1.34774	0.0871648	0.0376516		33.9759	0.471948	2.25991	0.791316	2.5415	0.0926011	3.97243		34	4.50174	3.29332	0.796128	2.64404	1.29519	5.60056		34	3.00413	5.78914	2.43547	1.12236	2.50002	4.95435
34.007	1.56324	0.177161	1.38247	1.36739	0.0871269	0.033411		34.4759	0.536369	2.25549	0.818771	2.52142	0.0921304	3.99344		34.5	3.73318	3.31179	0.719438	2.5026	1.2791	5.61005		34.5	3.30114	5.75101	2.93648	1.11854	2.62084	4.82329
34.507	1.39442	0.178555	1.3906	1.38077	0.0908366	0.0300622		34.9759	0.544634	2.25353	0.856184	2.51122	0.0925929	4.03037		35	3.3468	3.31673	0.657653	2.38059	1.27778	5.70938		35	3.30271	5.36428	3.00386	1.10878	2.6209	4.67313
35.007	1.24855	0.185288	1.37882	1.49273	0.0737298	0.0263412		35.4759	0.552899	2.25158	0.893596	2.50102	0.0930554	4.06731		35.5	3.05374	3.31863	0.609731	2.25727	1.27645	5.80241		35.5	3.30428	4.90781	3.00149	1.08446	2.62096	4.62861
35.507	1.09148	0.187706	1.36311	1.72004	0.0685904	0.0247601		35.9759	0.551954	2.23768	0.942247	2.5124	0.0945863	4.09998		36	2.87509	3.3085	0.578663	2.13624	1.30595	5.9071		36	3.03222	4.8349	2.99912	1.06335	2.5117	4.63617
36.007	0.965373	0.192288	1.35337	1.85366	0.0624542	0.0233106		36.4759	0.549763	2.22215	0.992418	2.5267	0.0962618	4.13206		36.5	2.7364	3.30215	0.551329	2.02957	1.34192	6.04325		36.5	2.45451	4.83786	2.71422	1.05945	2.37157	4.64373
36.507	0.867828	0.197983	1.34836	1.91452	0.0561295	0.022091		36.9759	0.545762	2.21029	1.01507	2.55734	0.0961603	4.14121		37	2.53833	3.28885	0.519343	1.93749	1.36553	6.05337		37	1.88462	4.84082	2.49019	1.05594	2.21386	4.68899
37.007	0.79643	0.20374	1.34687	1.92354	0.0504244	0.0211996		37.4759	0.541128	2.19971	1.02808	2.5937	0.0954371	4.14234		37.5	2.41944	3.27521	0.508504	1.89264	1.39151	6.06351		37.5	1.64268	4.95627	2.34383	1.03144	2.09446	4.78903
37.507	0.748771	0.208506	1.34765	1.90168	0.0461474	0.0207349		37.9759	0.559242	2.19664	1.02212	2.63434	0.0978844	4.14277		38	2.41392	3.23004	0.505043	1.86346	1.44752	6.04499		38	1.64365	5.01187	2.25547	0.989294	2.01836	4.95336
38.007	0.72244	0.211229	1.34947	1.86986	0.0441068	0.0207951		38.4759	0.593761	2.19897	1.00247	2.67807	0.102618	4.14269		38.5	2.40606	3.16733	0.498911	1.80629	1.5144	5.86679		38.5	1.63594	5.01492	2.13419	0.963543	1.95769	5.13403
38.507	0.715028	0.21086	1.3511	1.84902	0.0451107	0.0214787		38.9759	0.632399	2.20389	0.976673	2.72493	0.106629	4.14381		39	2.40753	3.11294	0.496463	1.73997	1.56413	5.77318		39	1.62823	5.01796	1.93992	0.952581	1.88291	5.29218
39.007	0.724125	0.206344	1.35131	1.86009	0.0499677	0.022884		39.4759	0.676257	2.21208	0.943073	2.77578	0.109721	4.14646		39.5	2.41976	3.07558	0.495353	1.70757	1.63938	5.76896		39.5	1.6263	5.01253	1.74849	0.943341	1.78225	5.38644
39.507	0.747322	0.196632	1.34885	1.92401	0.0594858	0.0251094		39.9759	0.713233	2.21913	0.908975	2.82735	0.112556	4.14759		40	2.46568	3.0653	0.494244	1.70316	1.76091	5.77026		40	1.62436	4.97159	1.59663	0.934112	1.69304	5.42246
40.007	0.802553	0.19025	1.3788	1.94099	0.0515907	0.0198631		40.4759	0.73258	2.22328	0.873606	2.88079	0.114728	4.14486		40.5	2.52333	3.06709	0.49447	1.68241	1.87548	5.77999		40.5	1.55255	4.94717	1.53031	0.930681	1.64231	5.44346
40.507	0.849075	0.191905	1.37226	1.96089	0.0619696	0.0215965		40.9759	0.748699	2.2264	0.837464	2.92777	0.116554	4.14085		41	2.55014	3.06889	0.504024	1.67459	1.94293	5.78973		41	1.40666	4.95018	1.50187	0.92962	1.59108	5.46253
41.007	0.891555	0.192657	1.37783	1.97212	0.0706968	0.0239322		41.4759	0.745088	2.2232	0.7966	2.93533	0.116266	4.12899		41.5	2.55589	3.07068	0.513564	1.67505	1.96402	5.79548		41.5	1.31155	4.95319	1.45364	0.933817	1.53172	5.47454
41.507	0.927461	0.193062	1.39114	1.9772	0.0776827	0.0264816		41.9759	0.741457	2.22001	0.755744	2.94286	0.115982	4.11712		42	2.56821	3.0812	0.516434	1.67552	1.96672	5.79409		42	1.25859	4.97563	1.395	0.953903	1.51119	5.48384
42.007	0.954264	0.193673	1.4078	1.97867	0.0828379	0.0288562		42.4759	0.717021	2.22538	0.722082	2.92106	0.120738	4.10502		42.5	2.62929	3.09173	0.523288	1.68404	1.98233	5.72859		42.5	1.05074	5.08474	1.33979	1.00731	1.51041	5.53914
42.507	0.969432	0.195047	1.42343	1.97905	0.0860726	0.0306674		42.9759	0.692585	2.23075	0.688421	2.89927	0.125493	4.09293		43	2.70402	3.11667	0.526145	1.68451	1.98977	5.60004		43	0.830305	5.3429	1.23985	1.09386	1.51045	5.64549
43.007	0.970435	0.197739	1.43365	1.98087	0.0872973	0.0315267		43.4759	0.670409	2.24468	0.659786	2.83894	0.152014	4.10286		43.5	2.82292	3.24853	0.542608	1.85297	1.98803	5.55308		43.5	0.766336	5.59476	1.10496	1.18188	1.51514	5.7098
43.507	0.954743	0.202305	1.43407	1.98666	0.0864224	0.0310456		43.9759	0.648598	2.25999	0.631961	2.77239	0.182048	4.11633		44	4.30597	3.41448	0.652587	2.32567	1.98629	5.51293		44	0.756617	5.76075	1.00266	1.22957	1.51999	5.72902
44.007	0.919824	0.209298	1.42033	1.99895	0.0833582	0.0288355		44.4759	0.622005	2.26508	0.612721	2.69149	0.20927	4.1371		44.5	6.38293	3.44889	0.824387	2.71271	1.91334	5.46748		44.5	0.757257	5.85188	0.938123	1.24668	1.52402	5.74828
44.507	0.863149	0.219276	1.38803	2.02026	0.0780152	0.0245078		44.9759	0.593563	2.26623	0.596799	2.60503	0.235403	4.16069		45	6.38612	3.45085	0.893916	2.72163	1.74558	5.45068		45	0.778223	5.88008	0.898242	1.26718	1.52406	5.76115
45.007	0.811231	0.226954	1.31136	2.08057	0.07517	0.0294743		45.4759	0.5882	2.26641	0.581853	2.51341	0.276297	4.17151		45.5	6.38932	3.45281	0.892512	2.72227	1.60816	5.45995		45.5	0.812482	5.88357	0.871806	1.29237	1.52543	5.78997
45.507	0.76	0.23464	1.35018	2.06854	0.0707949	0.0227349		45.9759	0.599467	2.26589	0.567611	2.41805	0.327827	4.17314		46	6.314	3.41363	0.891108	2.72292	1.56195	5.46923		46	0.960917	5.90852	0.844657	1.32734	1.52547	5.86711
46.007	0.698197	0.239463	1.37157	2.06898	0.0678503	0.0195206		46.4759	0.613212	2.26467	0.558628	2.33461	0.367832	4.17271		46.5	5.17972	3.37025	0.843769	2.62257	1.56046	5.50789		46.5	1.17756	5.9335	0.827576	1.38644	1.52734	5.97727
46.507	0.631296	0.241953	1.37908	2.08012	0.0660511	0.0187681		46.9759	0.630363	2.26249	0.556871	2.26752	0.392001	4.16948		47	4.4313	3.33034	0.766447	2.54686	1.55593	5.60118		47	1.29051	5.96332	0.826492	1.44653	1.53651	6.07282
47.007	0.564767	0.242644	1.37625	2.10018	0.0651124	0.0194138		47.4759	0.647421	2.2603	0.555366	2.20097	0.41613	4.16593		47.5	3.90258	3.31844	0.700789	2.42156	1.55445	5.65869		47.5	1.34662	5.96685	0.825409	1.47104	1.54519	6.08231
47.507	0.504082	0.242067	1.36663	2.12741	0.0647493	0.0203944		47.9759	0.660112	2.25793	0.565602	2.15968	0.438354	4.14793		48	3.69981	3.30544	0.65666	2.30325	1.56681	5.73383		48	1.52248	5.97038	0.824326	1.46968	1.57228	6.09182
48.007	0.454713	0.240753	1.35376	2.16004	0.064677	0.0206465		48.4759	0.672804	2.25556	0.575838	2.1184	0.460578	4.12992		48.5	3.54681	3.25064	0.638298	2.24148	1.57848	5.86302		48.5	1.5234	5.85356	0.835853	1.46832	1.71871	6.02946
48.507	0.422131	0.239236	1.34117	2.19628	0.0646104	0.0191067		48.9759	0.72761	2.2482	0.582303	2.08143	0.456787	4.11159		49	3.44648	3.15782	0.620949	2.16352	1.59857	5.92135		49	1.67408	5.47802	0.957082	1.45289	2.13219	5.72135
49.007	0.411808	0.238045	1.33242	2.23439	0.0642647	0.0147116		49.4759	0.788093	2.24017	0.58826	2.04505	0.449489	4.09322		49.5	3.34088	3.06931	0.597704	2.01849	1.621	5.93129		49.5	1.82487	5.06318	1.31784	1.38419	2.51398	5.36321
49.507	0.429216	0.237715	1.33104	2.27258	0.063355	0.0063977		49.9759	0.84864	2.23161	0.595086	2.00646	0.444583	4.07087		50	3.01908	3.00049	0.590601	1.87938	1.63329	5.94125		50	2.09526	4.95012	1.99471	1.27312	2.51752	5.04685
50.007	0.439585	0.237279	1.33422	2.31719	0.0525971	0.00135079		50.4759	0.90921	2.22287	0.602215	1.96711	0.440513	4.04713		50.5	2.79377	2.95194	0.583837	1.81196	1.65466	5.91581		50.5	2.57032	4.95313	2.72368	1.17791	2.51758	4.73707
50.507	0.412932	0.240468	1.33213	2.29532	0.0520508	0.00150071		50.9759	0.971691	2.21149	0.61101	1.92841	0.443696	4.02898		51	2.78455	2.92873	0.575112	1.78795	1.69283	5.91018		51	3.0678	4.95615	2.94112	1.09777	2.51764	4.67023
51.007	0.402633	0.244241	1.32852	2.28923	0.0527938	0.000474379		51.4759	1.03544	2.19835	0.62091	1.89014	0.451688	4.01454		51.5	2.74461	2.90517	0.561479	1.72795	1.7804	5.90269		51.5	3.24099	5.09596	2.93878	1.01472	2.39587	4.67784
51.507	0.405114	0.248226	1.32448	2.29487	0.0545121	-0.0013428		51.9759	1.09328	2.1819	0.639154	1.85732	0.462647	3.99992		52	2.70275	2.88852	0.549176	1.61404	1.91359	5.88736		52	3.24254	5.09905	2.93645	0.967754	2.23144	4.68546
52.007	0.416805	0.252054	1.32114	2.30821	0.0568916	-0.00356539		52.4759	1.14423	2.16157	0.667139	1.83084	0.47707	3.98507		52.5	2.55919	2.88649	0.548027	1.50519	2.01067	5.89726		52.5	3.24409	5.10214	2.72814	0.957324	1.99296	4.84089
52.507	0.434133	0.255352	1.31959	2.3252	0.0596181	-0.00580799		52.9759	1.2004	2.14471	0.701057	1.8014	0.4938	3.97074		53	2.41739	2.8696	0.54688	1.40207	2.08178	5.90717		53	2.97986	5.05382	2.52156	0.940416	1.87433	4.97488
53.007	0.453526	0.25775	1.32096	2.34182	0.0623775	-0.00768516		53.4759	1.2676	2.13516	0.747502	1.76569	0.515397	3.95749		53.5	2.38337	2.84388	0.562413	1.26225	2.22026	5.92055		53.5	2.57145	4.93836	2.38563	0.926898	1.83852	5.07372
53.507	0.471414	0.258878	1.32634	2.35402	0.0648556	-0.00881149		53.9759	1.32963	2.12882	0.789773	1.73034	0.535508	3.94524		54	2.41088	2.82772	0.559948	1.17972	2.39984	5.94204		54	2.29176	4.94137	2.26056	0.923376	1.77284	5.19004
54.007	0.484223	0.258365	1.33685	2.35776	0.0667382	-0.00880155		54.4759	1.36834	2.137	0.813206	1.69666	0.548905	3.93751		54.5	2.35078	2.82411	0.5761	1.16049	2.51283	5.95201		54.5	2.01312	4.94438	2.13011	0.914028	1.73603	5.3134
54.507	0.488382	0.25584	1.35361	2.34902	0.0677113	-0.00726994		54.9759	1.40504	2.14552	0.837654	1.66275	0.562155	3.93064		55	2.35223	2.81951	0.574932	1.09838	2.58583	5.962		55	1.8099	4.95115	2.07231	0.912976	1.73608	5.37288
55.007	0.535722	0.260689	1.40237	2.33684	0.0833568	0.00813461		55.4759	1.39467	2.16202	0.885702	1.62364	0.57197	3.94361		55.5	2.40725	2.80233	0.565285	1.09874	2.6651	5.94558		55.5	1.81092	5.01476	2.06203	0.911925	1.73612	5.38144
55.507	0.472714	0.254759	1.34328	2.31403	0.0786513	-0.00125393		55.9759	1.3843	2.17852	0.933749	1.58454	0.581785	3.95659		56	2.47039	2.804	0.546854	1.09911	2.7232	5.91887		56	1.81195	5.27649	2.06021	0.915014	1.76107	5.39
56.007	0.438979	0.249183	1.31447	2.29155	0.0766465	-0.00574267		56.4759	1.39152	2.18379	0.976292	1.55798	0.588608	3.95627		56.5	2.50937	2.80568	0.534636	1.17755	2.74344	5.86209		56.5	1.84602	5.66778	2.05839	0.931802	1.96183	5.36549
56.507	0.427243	0.244555	1.30896	2.26988	0.0766548	-0.00639999		56.9759	1.40066	2.18782	1.01823	1.53278	0.595106	3.95449		57	2.54033	2.84858	0.531221	1.21313	2.77469	5.79977		57	1.97593	5.84127	2.11973	0.930741	2.36646	5.26973
57.007	0.43023	0.241469	1.31974	2.24949	0.077989	-0.00429422		57.4759	1.5387	2.19657	1.07749	1.49959	0.607257	3.94112		57.5	2.54186	2.8967	0.530086	1.21351	2.80589	5.78739		57.5	2.17836	5.84474	2.36923	0.92968	2.62716	5.04492
57.507	0.440666	0.240518	1.33981	2.23087	0.0799615	-0.000493741		57.9759	1.72164	2.20696	1.14278	1.4636	0.621378	3.9237		58	2.56572	2.92099	0.528951	1.23183	2.80368	5.78734		58	2.28714	5.8482	2.7776	0.907582	2.62723	4.71032
58.007	0.451276	0.242296	1.36217	2.21448	0.0818848	0.0039331		58.4759	2.01272	2.21409	1.18421	1.43137	0.635769	3.8947		58.5	2.58961	2.92747	0.527818	1.25014	2.82983	5.76599		58.5	2.28833	5.59478	2.89557	0.863321	2.62729	4.48286
58.507	0.454785	0.247395	1.37981	2.20079	0.0830717	0.00791794		58.9759	2.38165	2.21887	1.20848	1.40183	0.650355	3.85738		59	2.604	2.95754	0.559126	1.29153	2.8276	5.74761		59	2.28953	5.17263	2.89326	0.847472	2.59647	4.4826
59.007	0.443919	0.25641	1.38573	2.1903	0.0828346	0.0103924		59.4759	2.73634	2.2196	1.23364	1.37315	0.664202	3.81416		59.5	2.61841	2.98764	0.617942	1.33357	2.82538	5.75168		59.5	2.07023	5.01897	2.89095	0.846457	2.4403	4.48996
59.507	0.411402	0.269934	1.37294	2.18347	0.080486	0.0102882		59.9759	3.02688	2.20211	1.26286	1.3483	0.674717	3.7444		60	2.81844	2.9894	0.661121	1.35063	2.77519	5.69163		60	1.81471	5.02202	2.6062	0.845442	2.2808	4.49733
60.007	0.364086	0.274739	1.34146	2.15331	0.0709415	-0.00120845		60.4759	3.30614	2.18329	1.2924	1.32382	0.685956	3.67285		60.5	4.0114	3.0233	0.701646	1.65247	2.66315	5.46724		60.5	1.61101	5.02507	2.32472	0.849191	2.15931	4.61797
60.507	0.325113	0.287507	1.33369	2.15477	0.0820188	0.00339707		60.9759	3.30561	2.13168	1.32998	1.30861	0.715095	3.55672		61	5.8256	3.04359	0.814563	2.23967	2.5722	5.14374		61	1.48061	5.0884	2.10422	0.868757	2.03584	4.75183
61.007	0.288333	0.290877	1.32585	2.14635	0.0906547	0.0078685		61.4759	3.30508	2.08006	1.36757	1.29341	0.744234	3.4406		61.5	6.7078	3.04538	1.02072	2.6717	2.41486	4.94502		61.5	1.48026	5.1302	1.91869	0.90013	1.91302	4.90633
61.507	0.25444	0.287309	1.31745	2.12886	0.0974038	0.0122841		61.9759	2.98022	2.02329	1.41711	1.26295	0.817417	3.32562		62	6.75071	3.04716	1.29568	2.94956	2.23045	4.81373		62	1.48116	5.13976	1.77863	0.912707	1.81626	5.02621
62.007	0.224133	0.279261	1.308	2.10314	0.102821	0.0167223		62.4759	2.62004	1.96595	1.46797	1.23083	0.895395	3.21076		62.5	6.75406	2.89916	1.63059	3.26129	2.10736	4.50465		62.5	1.48207	5.14287	1.71095	0.915766	1.75986	5.07081
62.507	0.198107	0.269192	1.29702	2.07001	0.10746	0.0212613		62.9759	2.27736	1.90913	1.50659	1.20002	1.07079	3.10551		63	6.75742	2.65782	1.96791	3.55816	1.97379	4.14375		63	1.54265	5.14598	1.70935	0.916254	1.71424	5.08474
63.007	0.177059	0.259561	1.28401	2.03029	0.111876	0.0259794		63.4759	1.94015	1.85247	1.54137	1.16964	1.27671	3.00327		63.5	6.59847	2.49273	2.20578	3.73645	1.76972	3.89352		63.5	1.60748	5.14909	1.70774	0.929056	1.63707	5.13915
63.507	0.161685	0.252826	1.26849	1.98482	0.116624	0.0309549		63.9759	1.6678	1.79753	1.57094	1.13917	1.46197	2.90866		64	6.45992	2.36163	2.29132	3.84849	1.55362	3.62546		64	1.78507	5.15221	1.71414	0.941587	1.56289	5.14739
64.007	0.152683	0.251446	1.24996	1.93442	0.122259	0.0362661		64.4759	1.43836	1.74372	1.59704	1.10866	1.63355	2.8191		64.5	6.46315	2.2154	2.28888	4.03073	1.38052	3.36614		64.5	2.16601	5.14997	1.76421	0.945518	1.46529	5.15564
64.507	0.150748	0.257879	1.22795	1.87991	0.129334	0.0419914		64.9759	1.25894	1.69038	1.62755	1.08305	1.75889	2.7235		65	6.46351	2.07638	2.28644	4.15591	1.27085	3.14656		65	2.61246	5.13834	1.88404	0.961996	1.33249	5.12698
65.007	0.208547	0.295667	1.20519	1.82856	0.141622	0.0730075		65.4759	1.13788	1.63758	1.66317	1.06317	1.83029	2.62085		65.5	6.32184	1.95772	2.24705	4.1568	1.17224	2.93398		65.5	3.05713	5.11084	2.33376	0.97359	1.25481	4.92017
65.507	0.208466	0.297437	1.16734	1.74897	0.169098	0.0774601		65.9759	1.03905	1.58795	1.69847	1.04268	1.84369	2.52056		66	6.11786	1.86491	2.12328	4.15769	1.05555	2.87632		66	3.35639	5.0927	3.63514	0.972506	1.21283	4.65572
66.007	0.20505	0.372593	1.12051	1.67423	0.197513	0.126356		66.4759	0.987068	1.54501	1.73308	1.0209	1.73496	2.42522		66.5	5.73134	1.85314	1.93265	4.02885	0.936678	2.88189		66.5	3.43003	4.9294	4.83369	0.971422	1.13681	4.37745
66.507	0.198594	0.507848	1.06655	1.60406	0.225539	0.214185		66.9759	0.944268	1.5013	1.76717	0.999024	1.63107	2.3327		67	5.21138	1.85439	1.65733	3.72632	0.841731	2.88746		67	3.43165	4.76592	4.83023	0.948998	1.03803	4.29486
67.007	0.189394	0.689912	1.00735	1.53821	0.251848	0.335439		67.4759	0.942757	1.45415	1.79896	0.976711	1.54889	2.25284		67.5	4.60856	1.85565	1.39716	3.44639	0.804672	3.02886		67.5	3.43326	4.66519	4.82677	0.900669	0.948886	4.30197
67.507	0.177746	0.905495	0.944781	1.47641	0.275113	0.484608		67.9759	0.941393	1.40721	1.82999	0.954334	1.47687	2.17284		68	3.73781	1.94997	1.25678	3.30879	0.803623	3.31821		68	3.39818	4.52022	4.39533	0.570915	0.887138	4.30909
68.007	0.163945	1.14131	0.880716	1.4184	0.294007	0.656183		68.4759	0.943406	1.36508	1.84371	0.930479	1.63768	2.08983		68.5	3.10842	2.07205	1.15402	3.22256	0.802574	3.72605		68.5	3.34577	4.52302	3.18571	0.000643143	0.872223	4.52746
68.507	0.148288	1.38406	0.817031	1.36392	0.307201	0.844656		68.9759	0.945418	1.32294	1.85743	0.906625	1.79848	2.00681		69	2.99748	2.13806	1.04407	3.07973	0.818335	4.14928		69	3.31781	4.52582	2.46255	9.34043e-05	0.872255	4.72587
69.007	0.131069	1.62047	0.755601	1.3127	0.313367	1.04452		69.4759	0.943613	1.28147	1.86717	0.878739	2.14036	1.93172		69.5	2.99921	2.16939	0.97644	2.88821	0.854829	4.4318		69.5	3.26913	4.53916	2.14469	-0.000456033	0.864979	4.79263
69.507	0.112586	1.83724	0.698299	1.26448	0.311179	1.25026		69.9759	0.941394	1.24007	1.87647	0.850415	2.50191	1.8575		70	3.00094	2.21348	0.936037	2.67583	0.901485	4.60492		70	2.94796	4.65867	1.98267	0.032749	0.865841	4.88292
70.007	0.0633046	2.01584	0.658301	1.23105	0.330822	1.45482		70.4759	0.931739	1.20091	1.86969	0.831055	2.87007	1.77951		70.5	3.09777	2.27148	0.884211	2.53391	0.940848	4.78288		70.5	2.36329	4.898	1.85949	0.614343	0.866039	5.05313
70.507	0.0623719	2.12464	0.609425	1.17724	0.322033	1.64466		70.9759	0.919765	1.16245	1.8579	0.814492	3.24029	1.70035		71	3.16201	2.33513	0.821626	2.44446	0.976219	4.94898		71	1.96123	5.2872	1.70613	0.973529	0.866071	5.23066
71.007	0.0559965	2.20025	0.566517	1.13233	0.315162	1.81501		71.4759	0.905935	1.12336	1.84786	0.802806	3.44193	1.62701		71.5	3.184	2.36525	0.774418	2.33247	1.05558	5.1119		71.5	1.68278	5.63722	1.46092	1.12606	0.865936	5.34238
71.507	0.0458897	2.24829	0.528666	1.09404	0.309563	1.96327		71.9759	0.890977	1.08388	1.83889	0.794087	3.54102	1.55722		72	3.18581	2.37379	0.748918	2.18892	1.15259	5.26531		72	1.4477	5.86661	1.17453	1.20051	0.863643	5.44388
72.007	0.033763	2.2744	0.494956	1.06008	0.304589	2.08687		72.4759	0.908663	1.04887	1.84017	0.785225	3.52069	1.48525		72.5	3.18763	2.396	0.722501	2.07298	1.22323	5.36803		72.5	1.38935	5.99362	1.02401	1.22572	0.863674	5.55485
72.507	0.0213278	2.28419	0.464476	1.02819	0.299594	2.18321		72.9759	0.961431	1.01864	1.85248	0.776212	3.37203	1.41095		73	3.11435	2.43672	0.683412	2.00314	1.28492	5.43081		73	1.37963	6.1086	0.965525	1.25091	0.863872	5.6577
73.007	0.0102954	2.28328	0.436311	0.996058	0.29393	2.2497		73.4759	1.03182	0.992748	1.85004	0.764567	3.19322	1.34357		73.5	2.98468	2.49452	0.640253	1.94915	1.32228	5.46373		73.5	1.3805	6.24622	0.888392	1.26972	0.878687	5.74185
73.507	0.00237741	2.27731	0.409549	0.961418	0.28695	2.28376		73.9759	1.13926	0.97596	1.81659	0.747388	2.95104	1.29073		74	2.9864	2.55596	0.622221	1.94966	1.37729	5.47302		74	1.38137	6.47164	0.853448	1.32934	0.925397	5.82555
74.007	-0.000714934	2.27189	0.383277	0.921982	0.278008	2.2828		74.4759	1.25479	0.957398	1.76842	0.729634	2.71145	1.23825		74.5	2.98813	2.64046	0.621019	1.95017	1.51378	5.48232		74.5	1.45895	6.64655	0.852348	1.32806	0.989716	5.83472
74.507	0.00272983	2.27266	0.35658	0.875467	0.266457	2.24423		74.9759	1.40667	0.930858	1.65401	0.70929	2.48352	1.18737		75	3.02602	2.74737	0.619817	2.02775	1.5385	5.43868		75	1.82361	6.65043	0.85125	1.32679	1.03394	5.84389
75.007	-0.0376808	2.31241	0.320255	0.828812	0.28449	2.23953		75.4759	1.55406	0.904209	1.53847	0.689205	2.2569	1.13668		75.5	3.85019	2.85392	0.791779	2.34803	1.53703	5.26746		75.5	2.24239	6.6543	1.00604	1.2384	1.06537	5.81709
75.507	0.0385152	2.26737	0.301192	0.809368	0.258768	2.14704		75.9759	1.59874	0.875089	1.39691	0.675029	2.05995	1.09029		76	5.08286	2.93866	1.15961	2.74487	1.53555	5.06009		76	2.36364	6.59992	1.37925	0.970432	1.0875	5.72711
76.007	0.0868575	2.23905	0.28064	0.790015	0.240377	2.05721		76.4759	1.64342	0.845968	1.25536	0.660853	1.86301	1.04391		76.5	5.89706	2.9404	1.41974	3.02692	1.36483	4.91711		76.5	2.3967	6.49939	1.60099	0.830489	1.11727	5.7082
76.507	0.114032	2.22382	0.259206	0.770839	0.227697	1.97109		76.9759	1.63251	0.819312	1.16483	0.65261	1.69204	0.99944		77	6.21109	2.94214	1.55693	3.24225	1.23807	4.68815		77	2.42978	6.41187	1.59944	0.829483	1.15452	5.70555
77.007	0.126725	2.21805	0.237497	0.751923	0.219105	1.88977		77.4759	1.61559	0.792922	1.07982	0.645008	1.52388	0.955179		77.5	6.50365	2.9054	1.70369	3.47077	1.16204	4.2691		77.5	2.43103	6.37492	1.5979	0.828478	1.16203	5.68204
77.507	0.131621	2.2181	0.216121	0.733354	0.21298	1.81432		77.9759	1.55756	0.773851	1.02415	0.637252	1.37818	0.915527		78	6.74812	2.75853	1.81303	3.66304	1.05902	3.89014		78	2.43228	6.37865	1.59636	0.904112	1.25959	5.65846
78.007	0.135407	2.22032	0.195686	0.715216	0.207701	1.74581		78.4759	1.48671	0.757062	0.977623	0.629446	1.23947	0.877312		78.5	6.75148	2.55962	1.85412	3.68835	0.956445	3.61929		78.5	2.5959	6.31538	1.61343	1.07115	1.63642	5.53984
78.507	0.144769	2.22109	0.176798	0.697594	0.201645	1.68533		78.9759	1.46536	0.736158	0.928156	0.622499	1.12599	0.845161		79	6.60968	2.35344	1.8731	3.68915	0.833142	3.38313		79	2.99648	6.21558	1.77714	1.11655	2.1618	5.23325
79.007	0.166392	2.21676	0.160066	0.680573	0.193192	1.63394		79.4759	1.47401	0.712762	0.876907	0.616071	1.02779	0.816686		79.5	6.61298	2.21347	1.91283	3.68996	0.747098	3.21432		79.5	4.25742	6.01573	2.3042	1.11539	2.50361	4.91057
79.507	0.206962	2.2037	0.146096	0.664239	0.18072	1.59272		79.9759	1.46695	0.689856	0.823046	0.607447	0.945485	0.785627		80	6.39449	2.09208	1.91067	3.54968	0.712241	3.05821		80	5.80906	5.65539	3.21543	1.11423	2.71301	4.56805
80.007	0.254505	2.20675	0.139555	0.649914	0.160798	1.10962		80.4759	1.44303	0.667479	0.766384	0.596464	0.880239	0.751797		80.5	6.2727	1.99688	1.90851	3.36504	0.649456	2.97761		80.5	5.81154	5.46186	4.40228	0.978842	2.94901	4.21064
80.507	0.259797	2.20271	0.118313	0.628813	0.160434	2.12307		80.9759	1.42341	0.646579	0.716624	0.585009	0.833425	0.718446		81	5.91816	1.96637	1.87118	3.17431	0.571142	2.98333		81	5.81402	5.40135	5.78543	0.793143	3.18484	3.83561
81.007	0.259128	2.20315	0.104577	0.61126	0.158272	2.84912		81.4759	1.41205	0.628515	0.680122	0.572649	0.822014	0.686017		81.5	4.88885	1.96768	1.71876	2.97103	0.541319	2.98905		81.5	5.62609	5.26745	7.01821	0.654561	3.35838	3.31867
81.507	0.255126	2.20677	0.096617	0.596846	0.154816	3.33216		81.9759	1.39363	0.612351	0.644498	0.559707	0.819811	0.655229		82	3.87029	1.96899	1.55026	2.8103	0.540422	3.04056		82	4.56317	5.10614	7.72309	0.555979	3.47177	2.82937
82.007	0.250418	2.21229	0.092699	0.585158	0.150571	3.61659		82.4759	1.34359	0.604693	0.612808	0.544162	0.85883	0.631787		82.5	3.48125	2.00251	1.40488	2.71495	0.539527	3.1616		82.5	4.05664	4.78555	8.01072	0.45072	3.58351	2.55367
82.507	0.247632	2.21845	0.0910911	0.575785	0.146042	3.74679		82.9759	1.29355	0.597034	0.581118	0.528618	0.897849	0.608345		83	3.43852	2.08422	1.27537	2.62926	0.557115	3.30356		83	3.49941	4.2943	8.09722	0.384001	3.62762	2.3928
83.007	0.249395	2.22395	0.0900607	0.568317	0.141732	3.76715		83.4759	1.2512	0.587464	0.547746	0.511084	0.993973	0.585032		83.5	3.40353	2.14598	1.16137	2.54397	0.622645	3.43536		83.5	2.7464	4.00983	8.09182	0.38324	3.6277	2.26689
83.507	0.258335	2.22751	0.0878754	0.562341	0.138147	3.72206		83.9759	1.21937	0.575282	0.512077	0.490834	1.16812	0.561895		84	3.36851	2.17498	1.07255	2.44314	0.73409	3.6254		84	2.31162	4.01237	8.08643	0.38248	3.62778	2.22174
84.007	0.277077	2.22786	0.0828029	0.557447	0.13579	3.6559		84.4759	1.18036	0.561118	0.479435	0.472086	1.38865	0.538424		84.5	3.34803	2.21329	1.00698	2.33323	0.849613	3.83714		84.5	2.13395	4.01491	7.79746	0.406166	3.47963	2.22606
84.507	0.308251	2.22372	0.0731106	0.553223	0.135167	3.61307		84.9759	1.12315	0.541924	0.454477	0.457151	1.72696	0.514103		85	3.32755	2.24042	0.975839	2.24999	0.991529	4.00735		85	1.86433	4.071	7.0425	0.513269	3.17494	2.23039
85.007	0.364892	2.19759	0.0572756	0.520653	0.139022	3.58709		85.4759	1.06258	0.523444	0.432706	0.442638	2.08731	0.489645		85.5	3.3518	2.26677	0.974375	2.25055	1.2112	4.13002		85.5	1.60606	4.21242	6.05737	0.646802	2.86194	2.26096
85.507	0.353559	2.21045	0.0553367	0.519507	0.147854	3.587		85.9759	0.981889	0.509255	0.430065	0.430651	2.57998	0.464363		86	3.35368	2.29315	0.972911	2.25111	1.3676	4.13739		86	1.51897	4.44249	5.11208	0.778185	2.57036	2.43983
86.007	0.355784	2.2243	0.0530422	0.523277	0.155031	3.58053		86.4759	0.901182	0.495068	0.427439	0.41866	3.07243	0.439085		86.5	4.13425	2.29461	1.10693	2.32044	1.36623	4.14477		86.5	1.50834	4.65521	4.4189	0.851508	2.32547	2.73463
86.507	0.368723	2.23794	0.0504824	0.530204	0.16105	3.56871		86.9759	0.809032	0.482321	0.434003	0.403367	3.43277	0.416987		87	5.8017	2.29606	1.40257	2.60904	1.36485	4.07501		87	1.50925	4.70032	4.0146	0.864243	2.20687	2.91785
87.007	0.389534	2.2502	0.0477478	0.538527	0.166409	3.55259		87.4759	0.716882	0.469573	0.440567	0.388074	3.79311	0.394888		87.5	6.34128	2.25438	1.63154	2.91414	1.27283	3.89246		87.5	1.51017	4.77791	3.76871	0.869591	2.16056	3.06593
87.507	0.415374	2.25989	0.0449288	0.546486	0.171606	3.5332		87.9759	0.6355	0.459778	0.447141	0.371854	4.00409	0.381538		88	6.34446	2.19063	1.74208	3.11128	1.08098	3.70531		88	1.53505	4.97695	3.49551	0.874308	2.13319	3.31421
88.007	0.443399	2.26583	0.0421157	0.552321	0.177138	3.51158		88.4759	0.555834	0.450452	0.453716	0.355486	4.19128	0.369581		88.5	6.34764	2.09444	1.82358	3.20841	0.969905	3.4001		88.5	1.71837	5.57663	3.19044	0.881266	2.1266	3.51267
88.507	0.470766	2.26685	0.039399	0.554271	0.183503	3.48877		88.9759	0.542871	0.435192	0.463138	0.340362	4.2322	0.354115		89	5.70466	1.97771	1.91458	3.2579	0.900494	3.09835		89	2.04531	6.39839	2.99107	0.897447	2.10155	3.66488
89.007	0.494633	2.26176	0.0368691	0.550576	0.191198	3.46582		89.4759	0.555514	0.417654	0.473652	0.325716	4.21696	0.337302		89.5	5.32819	1.87293	2.03737	3.28625	0.864632	2.90743		89.5	2.22595	6.74529	2.82479	0.908997	2.079	3.87879
89.507	0.512157	2.24938	0.0346163	0.539477	0.200721	3.44375		89.9759	0.568882	0.402647	0.481334	0.313135	4.19896	0.320632		90	5.09501	1.72597	2.19003	3.28699	0.783461	2.7162		90	2.22712	6.80625	2.58986	0.907948	2.07723	4.1555
90.007	0.544662	2.23766	0.0163991	0.520722	0.214302	3.42189		90.4759	0.582768	0.389454	0.486986	0.302035	4.17899	0.304064		90.5	4.65784	1.58695	2.18767	3.28773	0.601771	2.52903		90.5	2.2283	6.88216	2.3298	0.9069	2.02808	4.46523
90.507	0.551825	2.24314	0.0202912	0.53016	0.220599	3.41797		90.9759	0.599336	0.377829	0.494943	0.290867	4.13821	0.287126		91	4.20514	1.47845	2.18531	3.2645	0.490005	2.41473		91	2.02745	6.95768	1.9907	0.760474	1.92076	4.69781
91.007	0.542569	2.24334	0.0215536	0.53035	0.222834	3.40481		91.4759	0.619277	0.368175	0.505798	0.279612	4.07127	0.269724		91.5	3.74716	1.41279	2.17645	3.12013	0.489139	2.41449		91.5	1.67755	7.02364	1.7447	0.614208	1.74829	4.83996
91.507	0.523354	2.23918	0.020782	0.523817	0.222258	3.38509		91.9759	0.625626	0.358309	0.513923	0.269245	4.00417	0.254921		92	3.20608	1.41385	2.01501	2.89926	0.488273	2.4194		92	1.59912	7.10161	1.74307	0.613321	1.5655	4.97572
92.007	0.500642	2.23161	0.0185721	0.51309	0.22012	3.36147		92.4759	0.600707	0.347954	0.51577	0.260919	3.93671	0.246097		92.5	2.77517	1.41491	1.8859	2.70273	0.501518	2.42431		92.5	1.60006	7.21363	1.74144	0.612435	1.49823	5.14377
92.507	0.480894	2.22156	0.0155196	0.500696	0.217672	3.33664		92.9759	0.585311	0.337321	0.519232	0.252729	3.86662	0.23672		93	2.648	1.47871	1.74866	2.50914	0.52853	2.5813		93	1.60101	7.25018	1.78731	0.623596	1.49827	5.26481
93.007	0.47057	2.20997	0.0122203	0.489162	0.216162	3.31325		93.4759	0.627073	0.325017	0.532395	0.245357	3.78082	0.224025		93.5	2.64958	1.61286	1.60607	2.3451	0.54558	2.87707		93.5	1.90019	7.25436	1.89992	0.783944	1.49831	5.27322
93.507	0.476131	2.19775	0.00926996	0.481014	0.216841	3.294		93.9759	0.668826	0.312705	0.545554	0.238006	3.69494	0.211335		94	2.65116	1.69701	1.48217	2.24475	0.575094	3.18222		94	2.33026	7.25854	2.33813	1.00528	1.49835	5.28164
94.007	0.504038	2.18586	0.00726429	0.478781	0.220959	3.28155		94.4759	0.70748	0.29798	0.557279	0.237303	3.58592	0.200046		94.5	2.96609	1.71773	1.43755	2.1943	0.610013	3.31088		94.5	2.60799	7.25583	3.57228	1.15978	1.4984	5.22813
94.507	0.560753	2.17522	0.00679902	0.484989	0.229765	3.27857		94.9759	0.746135	0.283254	0.569004	0.2366	3.47691	0.188757		95	4.55238	1.71893	1.43574	2.06708	1.01327	3.31707		95	2.68588	7.12833	5.12575	1.25736	1.49511	5.01003
95.007	0.597256	2.13719	0.00751354	0.484934	0.242661	3.29419		95.4759	0.780065	0.275111	0.585753	0.235721	3.30319	0.176463		95.5	6.94199	1.72013	1.43393	1.82803	1.72636	3.32328		95.5	2.68722	6.80978	6.17685	1.27247	1.46241	4.75214
95.507	0.60724	2.19074	0.00615172	0.481728	0.265443	3.27605		95.9759	0.811369	0.270626	0.605294	0.234743	3.09351	0.163611		96	7.81107	1.66289	1.48096	1.62566	1.9573	3.25006		96	2.68856	6.44389	6.62585	1.29202	1.38532	4.48409
96.007	0.626981	2.21806	0.00674735	0.471572	0.286587	3.25602		96.4759	0.846107	0.264229	0.62031	0.232446	2.86483	0.154877		96.5	7.81489	1.53649	1.57516	1.46086	1.95558	3.08978		96.5	2.57837	6.03429	6.90755	1.31179	1.26966	4.20952
96.507	0.651801	2.22406	0.00850587	0.456879	0.305695	3.23487		96.9759	0.884238	0.255943	0.630853	0.228847	2.61737	0.150213		97	7.8187	1.41559	1.6263	1.31612	1.95386	2.89926		97	2.31816	5.56844	7.1441	1.32165	1.1382	3.91997
97.007	0.677027	2.21367	0.0106327	0.440062	0.32237	3.21338		97.4759	0.921344	0.248306	0.638152	0.224805	2.36979	0.146883		97.5	7.10866	1.31714	1.62436	1.21764	1.81026	2.65927		97.5	2.12673	5.2159	7.28449	1.36622	1.00856	3.55382
97.507	0.697981	2.19179	0.0123334	0.423532	0.336215	3.19232		97.9759	0.956653	0.241809	0.639756	0.219986	2.122	0.145892		98	5.87319	1.19832	1.62241	1.10786	1.68276	2.41989		98	2.04164	4.97661	7.41072	1.41433	0.89023	3.22314
98.007	0.70999	2.16337	0.0128133	0.409702	0.346834	3.17244		98.4759	0.99309	0.234851	0.640114	0.214679	1.88345	0.145236		98.5	4.42358	1.12124	1.5452	0.975976	1.51082	2.34507		98.5	1.96296	4.77033	7.55322	1.44559	0.793172	2.97093
98.507	0.708376	2.1333	0.0112778	0.400984	0.353829	3.15452		98.9759	1.03347	0.226289	0.636125	0.207666	1.67712	0.14575		99	3.4709	1.12126	1.42683	0.891669	1.38204	2.34987		99	1.86136	4.45059	7.69311	1.50186	0.688297	2.76555
99.007	0.688464	2.10652	0.00693255	0.399791	0.356802	3.13933		99.4759	1.06701	0.218031	0.633437	0.200755	1.47339	0.146215		99.5	2.9242	1.12219	1.27442	0.874674	1.3393	2.35469		99.5	1.66904	3.96426	7.97282	1.60074	0.581257	2.56828
99.507	0.64558	2.08793	-0.00101716	0.408534	0.355358	3.12763		99.9759	1.02501	0.213131	0.645129	0.19496	1.29839	0.146139		100	2.32381	1.12313	1.12071	0.852691	1.33794	2.4064		100	1.47054	3.65882	8.35057	1.69088	0.520766	2.35153
100.007	0.639425	2.08433	0.00289972	0.406071	0.368672	3.10322		100.476	0.983004	0.208232	0.65682	0.189166	1.12338	0.146063		100.5	1.95851	1.15598	1.04929	0.814022	1.33658	2.44691		100.5	1.39888	3.56234	8.50925	1.75444	0.490366	2.18242
100.507	0.615172	2.11101	-0.00514077	0.402707	0.352461	3.09562		100.976	0.945723	0.201527	0.698596	0.186514	0.992937	0.144399		101	1.73542	1.22528	1.00326	0.796137	1.41207	2.50972		101	1.39586	3.50443	8.50361	1.85991	0.456141	2.04374
101.007	0.595267	2.1258	-0.00529006	0.399522	0.347592	3.09174		101.476	0.908726	0.194714	0.742184	0.18405	0.865179	0.142639		101.5	1.7366	1.32682	0.942078	0.777163	1.57633	2.65313		101.5	1.36432	3.37834	8.49798	1.97264	0.410608	1.87642
101.507	0.579216	2.13094	0.000983345	0.396547	0.352173	3.09003		101.976	0.874395	0.187394	0.794539	0.184289	0.769906	0.138219		102	1.73779	1.40476	0.899549	0.759699	1.72961	2.90398		102	1.34529	3.10259	8.4095	2.0459	0.364576	1.69155
102.007	0.566527	2.12867	0.0122109	0.393814	0.364312	3.08894		102.476	0.840803	0.179933	0.849327	0.185277	0.683648	0.13306		102.5	1.79477	1.44792	0.86134	0.745697	1.8767	3.16908		102.5	1.34615	2.84001	8.25852	2.16221	0.317544	1.61493
102.507	0.556711	2.12123	0.0269241	0.391353	0.382117	3.08692		102.976	0.81016	0.17228	0.882797	0.1865	0.617341	0.128958		103	2.50881	1.449	0.85996	0.723669	2.12467	3.26036		103	1.347	2.62891	8.19045	2.30174	0.271009	1.61844
103.007	0.549273	2.11086	0.0436545	0.389196	0.403697	3.0824		103.476	0.781154	0.164518	0.904422	0.187854	0.562123	0.125443		103.5	3.01392	1.45008	0.858581	0.713775	2.78048	3.26648		103.5	1.36301	2.45196	8.18499	2.37002	0.230126	1.62196
103.507	0.543724	2.09979	0.0609335	0.387374	0.427161	3.07385		103.976	0.771819	0.158628	0.909327	0.18714	0.517841	0.123568		104	3.36521	1.44552	0.87359	0.654	3.53362	3.27261		104	1.53015	2.33035	8.13857	2.43222	0.182425	1.76045
104.007	0.53957	2.09028	0.0772925	0.385919	0.450615	3.0597		104.476	0.781919	0.154587	0.897712	0.184383	0.484367	0.123313		104.5	3.3671	1.39152	0.95074	0.540847	3.64863	3.18108		104.5	1.80008	2.21258	8.0922	2.54402	0.13389	1.95433
104.507	0.536321	2.08455	0.0912632	0.384861	0.47217	3.03842		104.976	0.844413	0.148745	0.879148	0.182065	0.454046	0.12391		105	3.36899	1.32514	0.949293	0.484059	3.64593	3.02434		105	1.94843	2.13188	8.07328	2.6742	0.104476	1.9583
105.007	0.500988	1.896	0.0930147	0.379878	0.620121	3.02921		105.476	0.99869	0.139751	0.848411	0.180516	0.429247	0.125998		105.5	3.35355	1.32616	0.947848	0.472164	3.64322	2.95707		105.5	1.94951	2.08438	8.01937	2.82568	0.0883651	1.96227
105.507	0.512664	2.02152	0.0879447	0.368896	0.51249	2.98954		105.976	1.19562	0.131665	0.820031	0.180479	0.40574	0.129279		106	2.78785	1.32719	0.919173	0.457878	3.27683	2.96275		106	1.95058	2.02169	7.92361	3.00967	0.0634397	1.83919
106.007	0.51783	2.06744	0.102452	0.358253	0.492024	2.95772		106.476	1.54083	0.126737	0.79984	0.185693	0.386724	0.1367		106.5	2.46247	1.34022	0.815559	0.45813	3.06137	2.96844		106.5	1.83236	1.931	7.84838	3.17389	0.046662	1.35174
106.507	0.519757	2.05034	0.130883	0.348222	0.53911	2.93225		106.976	1.88604	0.121809	0.779649	0.190908	0.367707	0.144122		107	2.34203	1.46447	0.761342	0.458381	3.05901	3.06768		107	1.54784	1.83904	7.77808	3.27677	0.0363693	0.875801
107.007	0.521714	1.98677	0.167587	0.339073	0.634134	2.91165		107.476	2.11879	0.124332	0.763083	0.195759	0.343219	0.158225		107.5	2.29984	1.56237	0.743131	0.464278	3.05665	3.23341		107.5	1.37816	1.73207	7.51525	3.35472	0.0265752	0.618661
107.507	0.526972	1.89332	0.20691	0.331076	0.757482	2.89441		107.976	2.32045	0.128914	0.74752	0.200509	0.317218	0.174175		108	2.2457	1.6132	0.732486	0.46453	3.18059	3.3341		108	1.33386	1.57578	6.90576	3.41158	0.0265927	0.501234
108.007	0.538801	1.78656	0.243201	0.324503	0.88954	2.87905		108.476	2.3564	0.160169	0.732354	0.202931	0.293227	0.204639		108.5	2.19201	1.61435	0.731202	0.464782	3.46367	3.34033		108.5	1.3321	1.49097	6.41235	3.42845	0.0262776	0.44817
108.507	0.560474	1.68305	0.270807	0.319623	1.01069	2.86405		108.976	2.30052	0.206206	0.717408	0.204062	0.270349	0.243148		109	2.08117	1.61551	0.729918	0.438532	3.67721	3.34657		109	1.25603	1.49223	6.2471	3.44396	0.026295	0.435782
109.007	0.595259	1.59937	0.284076	0.316708	1.10133	2.84793		109.476	2.09677	0.260476	0.704863	0.205779	0.255647	0.293413		109.5	2.01345	1.60393	0.746395	0.361648	3.82856	3.27999		109.5	1.25685	1.4935	6.11723	3.4481	0.0268114	0.437709
109.507	0.646427	1.55209	0.277355	0.316028	1.14183	2.82919		109.976	1.74717	0.322866	0.694685	0.208075	0.24901	0.355276		110	2.01475	1.52275	0.810368	0.317986	3.83612	3.12619		110	1.25767	1.49476	6.00992	3.44566	0.0271615	0.439639
110.007	0.687356	1.53775	0.26725	0.343996	1.16839	2.8181		110.476	1.44673	0.385742	0.684213	0.209711	0.247158	0.422612		110.5	2.01606	1.45135	0.898891	0.285394	3.83331	2.99936		110.5	1.30548	1.58933	5.9589	3.46819	0.077906	0.500407
110.507	0.676156	1.53411	0.298086	0.338377	1.16889	2.81493		110.976	1.23243	0.449468	0.673225	0.21019	0.253684	0.499533		111	2.93561	1.3785	0.935625	0.223009	3.8305	2.84605		111	1.4617	1.58385	5.80428	3.46573	0.136802	0.994898
111.007	0.662233	1.5355	0.305399	0.334297	1.17982	2.81036		111.476	1.04885	0.509517	0.66331	0.209134	0.265756	0.578338		111.5	4.56857	1.2912	0.939892	0.184736	3.65736	2.65091		111.5	1.54533	1.60436	5.65845	3.49541	0.178069	1.89034
111.507	0.646828	1.54011	0.294476	0.331537	1.19673	2.80506		111.976	0.972248	0.556768	0.657125	0.202738	0.297124	0.663696		112	4.96677	1.19733	0.938454	0.176459	3.45432	2.4623		112	1.66647	1.60568	5.7398	3.5242	0.211188	2.35345
112.007	0.631183	1.54611	0.270603	0.329881	1.21513	2.79967		112.476	0.902423	0.604601	0.651167	0.195979	0.328159	0.749528		112.5	4.96936	1.07808	0.937017	0.157305	3.17193	2.2805		112.5	1.73977	1.52217	5.7358	3.54238	0.211209	2.35795
112.507	0.61654	1.5517	0.239064	0.329111	1.23054	2.79487		112.976	0.906927	0.658819	0.647689	0.185238	0.355542	0.840538		113	4.97194	0.964992	0.934383	0.118783	2.89957	2.14083		113	1.75907	1.5197	5.73181	3.55264	0.21123	2.36246
113.007	0.604139	1.55505	0.205146	0.329012	1.23851	2.79129		113.476	0.911431	0.713037	0.644212	0.174497	0.382925	0.931548		113.5	3.85839	0.874569	0.919484	0.0789425	2.61282	2.02513		113.5	1.84162	1.52098	5.88163	3.57296	0.188795	2.3633
113.507	0.595222	1.55436	0.174134	0.329365	1.23454	2.78961		113.976	0.905761	0.773978	0.648934	0.167722	0.399446	1.0351		114	2.04865	0.779651	0.88846	0.0484455	2.25541	1.86548		114	1.87973	1.52225	5.96333	3.59727	0.15089	2.12161
114.007	0.59103	1.5478	0.151314	0.329953	1.21418	2.79047		114.476	0.899483	0.83532	0.654147	0.161183	0.415317	1.13941		114.5	0.682898	0.698017	0.820732	0.0318673	1.94123	1.68368		114.5	1.88078	1.52353	5.9592	3.6167	0.130949	1.54306
114.507	0.592804	1.53356	0.141972	0.330561	1.17294	2.79453		114.976	0.869378	0.890969	0.664306	0.158373	0.435195	1.24241		115	0.199453	0.627359	0.734295	0.0231201	1.6749	1.53627		115	1.88183	1.52481	5.95507	3.65538	0.111506	0.923868
115.007	0.598488	1.52561	0.132014	0.319034	1.12899	2.78297		115.476	0.833442	0.945223	0.675676	0.156475	0.456054	1.34508		115.5	0.0471672	0.556522	0.662304	0.0185066	1.43105	1.4504		115.5	1.7986	1.52609	5.8797	3.69014	0.0965538	0.520853
115.507	0.619455	1.48304	0.128654	0.317071	1.11149	2.77219		115.976	0.787932	0.993079	0.698238	0.150768	0.52842	1.44416		116	0.00765413	0.492024	0.605027	0.0136737	1.23273	1.38911		116	1.74502	1.52196	5.77258	3.68757	0.0782741	0.315294
116.007	0.626089	1.45834	0.123126	0.312844	1.08721	2.76578		116.476	0.737568	1.03769	0.726475	0.143129	0.626897	1.5414		116.5	-0.0338925	0.422927	0.565707	0.00426534	1.09328	1.3373		116.5	1.60094	1.50794	5.55816	3.68499	0.0604928	0.17582
116.507	0.623489	1.44747	0.116318	0.307876	1.0585	2.76283		116.976	0.722757	1.07963	0.739302	0.136503	0.780077	1.63777		117	-0.0334742	0.356682	0.547579	-0.000789587	0.999489	1.26127		117	1.31687	1.42424	5.21679	3.62351	0.0605109	0.140327
117.007	0.61675	1.44638	0.109119	0.30369	1.02772	2.76245		117.476	0.740295	1.11914	0.73811	0.1308	0.983029	1.73336		117.5	-0.0330557	0.305879	0.546432	-0.000617334	0.950665	1.13017		117.5	0.963934	1.32067	5.01593	3.51361	0.0605289	0.141858
117.507	0.61097	1.45102	0.102418	0.301812	0.997239	2.76371		117.976	0.756753	1.15398	0.745968	0.127014	1.1597	1.8318		118	0.037926	0.268908	0.545285	-0.000880873	0.905634	1.02671		118	0.513625	1.26223	4.96284	3.37073	0.0826729	0.14339
118.007	0.611246	1.45735	0.0971055	0.303765	0.969402	2.7657		118.476	0.771479	1.18133	0.768369	0.126309	1.29413	1.93483		118.5	0.167546	0.23972	0.548892	-0.000708636	0.83234	0.966559		118.5	0.459474	1.23344	4.95658	3.21363	0.104319	0.246539
118.507	0.622674	1.46133	0.0940696	0.311072	0.94657	2.76752		118.976	0.786204	1.20868	0.79077	0.125604	1.42857	2.03786		119	0.294274	0.221943	0.584545	0.000117588	0.758509	0.900947		119	0.460006	1.23457	4.88857	3.12937	0.147093	0.442954
119.007	0.650351	1.45892	0.0941998	0.325258	0.931101	2.76826		119.476	0.827582	1.23627	0.820375	0.125403	1.46409	2.15373		119.5	0.642595	0.208821	0.641794	0.00574057	0.69968	0.826228		119.5	0.460538	1.2357	4.84962	3.05725	0.241444	0.667698
119.507	0.699374	1.44606	0.0983851	0.347847	0.925353	2.767		119.976	0.87056	1.26387	0.850411	0.125232	1.49368	2.27038		120	1.23636	0.184941	0.686807	0.0172531	0.645889	0.74543		120	0.754599	1.23683	4.84615	2.95652	0.342785	0.796999
120.007	0.738967	1.39576	0.108265	0.359847	0.887265	2.77975		120.476	0.89937	1.29005	0.90819	0.126013	1.40854	2.38659		120.5	2.09394	0.135329	0.719611	0.0237533	0.574156	0.676132		120.5	0.913451	1.23797	4.84269	2.81204	0.424831	0.799411
120.507	0.849383	1.39032	0.140465	0.44231	0.904323	2.73843		120.976	0.924712	1.31587	0.972759	0.127027	1.29534	2.5027		121	2.54585	0.100171	0.749998	0.0276381	0.489165	0.618662		121	0.931686	1.24808	5.12439	2.624	0.50272	0.801827
121.007	0.919088	1.3844	0.15644	0.507654	0.90911	2.72424		121.476	0.966184	1.33892	1.0228	0.126565	1.17036	2.60899		121.5	2.54739	0.09972	0.764668	0.033706	0.407373	0.569991		121.5	0.93239	1.26199	5.63397	2.43894	0.578781	0.713254
121.507	0.955437	1.37804	0.15951	0.557521	0.90451	2.72951		121.976	1.01582	1.36055	1.0655	0.125356	1.03943	2.71032		122	2.54892	0.0992689	0.771042	0.0406487	0.367819	0.508548		122	0.933094	1.26692	6.15075	2.3366	0.622733	0.476782
122.007	0.965786	1.37128	0.152999	0.593553	0.893411	2.7466		122.476	1.06036	1.37519	1.1019	0.129786	0.922796	2.80672		122.5	1.85564	0.0940173	0.784786	0.0543595	0.353707	0.440182		122.5	0.860941	1.28085	6.66455	2.33477	0.687152	0.262433
122.507	0.957489	1.36417	0.140229	0.617393	0.878698	2.76785		122.976	1.10028	1.38349	1.1326	0.13934	0.819142	2.89865		123	0.611392	0.0887608	0.794084	0.0656739	0.335277	0.381747		123	0.814201	1.29858	6.96385	2.33293	0.84109	0.154498
123.007	0.937902	1.35676	0.124521	0.630683	0.863256	2.7856		123.476	1.11532	1.39198	1.15788	0.149519	0.722842	2.98886		123.5	-0.000363583	0.089241	0.794228	0.0680408	0.323983	0.314123		123.5	0.730971	1.32557	6.95912	2.42118	1.00884	0.11889
123.507	0.914378	1.34909	0.109198	0.635065	0.849973	2.79221		123.976	1.09045	1.40078	1.17445	0.1607	0.63834	3.07631		124	6.92539e-05	0.0884319	0.792898	0.0682249	0.297862	0.268315		124	0.731602	1.35212	6.9544	2.7728	1.0796	0.0950825
124.007	0.894274	1.3412	0.0975813	0.63218	0.841734	2.78001		124.476	1.05644	1.41066	1.19233	0.173466	0.56124	3.16771		124.5	0.000502278	0.0889119	0.791569	0.0684091	0.25663	0.231983		124.5	0.736629	1.35663	6.85886	3.17778	1.09943	0.0806658
124.507	0.884944	1.33315	0.0929943	0.623673	0.841426	2.74137		124.976	0.994084	1.42385	1.21428	0.191145	0.507103	3.27134		125	0.00798433	0.0881016	0.774062	0.0655352	0.228108	0.205449		125	0.810692	1.35782	6.56123	3.29611	1.21428	0.0662084
125.007	0.884351	1.32281	0.0847224	0.61049	0.833273	2.74351		125.476	0.932001	1.437	1.23509	0.209127	0.454022	3.37845		125.5	0.0104356	0.0722656	0.770689	0.0578538	0.204247	0.182805		125.5	1.14521	1.40199	5.98572	3.29375	1.43996	0.0498139
125.507	0.917431	1.28183	0.100199	0.595517	0.820246	2.75353		125.976	0.872265	1.44977	1.24612	0.229733	0.410067	3.51567		126	0.104603	0.0564155	0.769376	0.0580361	0.164991	0.156688		126	1.40824	1.47399	5.07733	3.29139	1.60874	0.0288162
126.007	0.930265	1.25897	0.105323	0.5832	0.805958	2.76798		126.476	0.812529	1.46253	1.25715	0.250339	0.366112	3.6529		126.5	0.585026	0.0413736	0.768064	0.0582185	0.133487	0.148401		126.5	1.51432	1.50305	4.50946	3.19949	1.66403	0.0113729
126.507	0.926096	1.25085	0.102608	0.573185	0.792122	2.78335		126.976	0.824714	1.47703	1.28187	0.264533	0.334811	3.78097		127	1.37302	0.0198538	0.802534	0.0614612	0.121737	0.130124		127	1.53462	1.50432	4.50619	3.09023	1.74013	0.0127304
127.007	0.90817	1.25406	0.0945658	0.565121	0.78045	2.79609		127.476	0.842831	1.49168	1.30772	0.278197	0.304553	3.9083		127.5	2.21114	0.00783933	0.841934	0.0743244	0.106306	0.103525		127.5	1.58752	1.50559	4.50292	3.02341	1.74017	0.0140898
127.507	0.879733	1.26521	0.0837085	0.558654	0.772653	2.80267		127.976	0.86105	1.50741	1.31986	0.27985	0.287269	4.01949		128	3.01163	0.00228423	0.876297	0.0810695	0.0801209	0.0836996		128	1.58846	1.50686	4.86212	2.89261	1.74022	0.040842
128.007	0.844029	1.2809	0.0725484	0.553434	0.770443	2.79955		128.476	0.879297	1.52342	1.32822	0.278193	0.273558	4.12625		128.5	3.26992	1.93706e-05	0.912363	0.0838803	0.0656533	0.0718196		128.5	1.58941	1.4555	5.32207	2.71943	1.65373	0.0821928
128.507	0.804304	1.29774	0.0635978	0.549108	0.77553	2.78321		128.976	0.875949	1.54454	1.3288	0.270124	0.267308	4.22933		129	3.27177	-0.00224768	0.938432	0.0849421	0.0641115	0.0650568		129	1.53831	1.41219	5.31832	2.58106	1.36553	0.0836454
129.007	0.763802	1.31234	0.0593689	0.545323	0.789627	2.7501		129.476	0.859599	1.56871	1.32469	0.258195	0.265548	4.33019		129.5	3.27361	-0.00180764	0.95891	0.088192	0.0634928	0.0622864		129.5	1.24455	1.41341	5.31457	2.47648	1.19798	0.0850999
129.507	0.725769	1.32128	0.0623741	0.541728	0.814445	2.69669		129.976	0.827462	1.58816	1.30017	0.246207	0.268367	4.41842		130	2.89975	-0.00136741	0.962129	0.0938499	0.0628744	0.0597929		130	0.709624	1.41463	5.13137	2.40517	1.11197	0.0821418
130.007	0.686823	1.2834	0.0636453	0.525518	0.823249	2.64292		130.476	0.778428	1.60254	1.25381	0.234155	0.276086	4.49313		130.5	2.33484	-0.000101695	0.960675	0.0964458	0.0622564	0.0575776		130.5	0.200352	1.49222	4.65464	2.28138	1.02414	0.0330471
130.507	0.683157	1.33652	0.0517605	0.505628	0.816217	2.63803		130.976	0.731084	1.61684	1.20592	0.222618	0.287274	4.56405		131	1.82967	0.00116494	0.959221	0.101013	0.0533591	0.0493067		131	0.0214879	1.5386	4.26186	2.1719	0.948109	0.000754472
131.007	0.67174	1.35617	0.0445734	0.484887	0.813793	2.61926		131.476	0.695634	1.63053	1.14731	0.214713	0.322873	4.6082		131.5	1.51747	0.0066806	0.942036	0.105581	0.0352775	0.0294751		131.5	0.000654389	1.53989	4.06112	2.09504	0.86509	-0.0036836
131.507	0.654156	1.35054	0.0409453	0.464176	0.814851	2.58989		131.976	0.660185	1.64422	1.08869	0.206808	0.358472	4.65236		132	1.05912	0.0172773	0.919636	0.105772	0.0251803	0.0107395		132	-0.00605206	1.54117	3.97919	2.00148	0.82551	-0.00717054
132.007	0.631991	1.32785	0.0397375	0.444375	0.818263	2.5532		132.476	0.653476	1.66593	1.0205	0.198033	0.430772	4.64841		132.5	0.691087	0.0280012	0.890577	0.105962	0.0212169	0.000334665		132.5	-0.00568974	1.54246	3.96079	1.90018	0.81855	-0.00583791
132.507	0.606829	1.29629	0.0398113	0.426364	0.822902	2.51248		132.976	0.647223	1.68776	0.952155	0.189245	0.503653	4.64369		133	0.644163	0.0341262	0.858072	0.106153	0.0175637	-0.00459951		133	-0.00532728	1.54375	3.92262	1.85378	0.806597	-0.0045035
133.007	0.580256	1.26408	0.0400279	0.411025	0.827641	2.47099		133.476	0.695987	1.7067	0.900676	0.177859	0.61574	4.64682		133.5	0.319247	0.0391925	0.832004	0.103496	0.016972	-0.00461943		133.5	-0.00319496	1.57926	3.84091	1.85019	0.801634	0.00477637
133.507	0.553857	1.23942	0.0392486	0.399237	0.831351	2.43203		133.976	0.75489	1.72511	0.852307	0.165995	0.735052	4.6514		134	0.0798053	0.04379	0.825131	0.103686	0.0163807	-0.00318924		134	0.192796	1.58057	3.77906	1.82298	0.801498	0.0373603
134.007	0.529217	1.23051	0.0363347	0.391881	0.832905	2.39886		134.476	0.825755	1.73737	0.806483	0.15609	0.859534	4.66359		134.5	0.0802728	0.0442504	0.823778	0.104753	0.0188438	-0.00175699		134.5	0.697531	1.58188	3.77622	1.78643	0.801363	0.102667
134.507	0.50792	1.24557	0.0301474	0.389838	0.831177	2.37478		134.976	0.901634	1.74705	0.761728	0.147007	0.986185	4.67898		135	0.370733	0.0430538	0.822426	0.104943	0.0213038	0.00346397		135	1.17074	1.27731	3.77339	1.75572	0.782084	0.157059
135.007	0.48461	1.37889	0.00836093	0.389356	0.813989	2.40321		135.476	0.954165	1.74983	0.729225	0.137014	1.12089	4.68504		135.5	0.421119	0.0451717	0.852352	0.10886	0.0289464	0.00869788		135.5	1.38067	0.464211	3.83211	1.73441	0.753151	0.180623
135.507	0.521508	1.4673	0.00486921	0.37938	0.801584	2.3824		135.976	0.988692	1.74729	0.706172	0.126318	1.26182	4.6839		136	0.986463	0.043974	0.918987	0.10949	0.0332261	0.0118999		136	1.42896	0.000390928	3.91749	1.73291	0.727379	0.192351
136.007	0.537088	1.51409	0.00397959	0.370431	0.792016	2.35839		136.476	0.988555	1.75098	0.687475	0.118183	1.42154	4.67883		136.5	1.54263	0.042538	0.963544	0.112313	0.0338442	0.0171569		136.5	1.45335	-0.012787	4.04755	1.73141	0.68496	0.194928
136.507	0.536166	1.52737	0.00488794	0.362224	0.784565	2.33269		136.976	0.941444	1.76313	0.67468	0.113519	1.60675	4.66843		137	1.64854	0.0405077	0.975381	0.118208	0.033243	0.0215479		137	1.45424	-0.0122869	4.3257	1.74576	0.637545	0.196532
137.007	0.523553	1.51521	0.0067901	0.35448	0.778513	2.30677		137.476	0.889693	1.77766	0.661737	0.109723	1.80126	4.66337		137.5	1.64968	0.0434578	0.977959	0.1184	0.0326423	0.0250694		137.5	1.45514	-0.0117866	4.63822	1.77063	0.585634	0.198138
137.507	0.504064	1.48572	0.00888194	0.346916	0.773141	2.28212		137.976	0.826269	1.79815	0.648424	0.108107	2.01918	4.67176		138	1.42883	0.0352543	0.976493	0.118593	0.0265668	0.0291864		138	1.42718	-0.00190865	4.86132	1.82372	0.513411	0.19602
138.007	0.482512	1.44698	0.0103593	0.33925	0.767729	2.26024		138.476	0.772587	1.81895	0.634779	0.107035	2.22505	4.68049		138.5	1.42988	0.0272808	0.975027	0.11725	0.0171542	0.0324306		138.5	1.34414	0.396496	4.9765	1.92967	0.460997	0.185647
138.507	0.463711	1.40708	0.0104181	0.3312	0.761559	2.24261		138.976	0.787356	1.84196	0.618805	0.10978	2.34631	4.69165		139	1.35194	0.0277339	0.939278	0.10998	0.0101827	0.0342086		139	1.22994	1.24226	5.04857	2.04011	0.461022	0.1603
139.007	0.452474	1.37411	0.00825412	0.322485	0.753911	2.23071		139.476	0.802124	1.86497	0.60283	0.112526	2.46757	4.70282		139.5	1.31981	0.0281871	0.867017	0.110171	0.00807713	0.0356946		139.5	1.00279	1.76139	5.04498	2.13544	0.461047	0.135868
139.507	0.453614	1.35615	0.00306326	0.312823	0.744068	2.22603		139.976	0.817426	1.87956	0.594206	0.111064	2.42557	4.69872		140	1.27746	0.0266195	0.829097	0.110362	0.00658061	0.0371827		140	0.591438	1.89626	5.0414	2.20189	0.479884	0.129704
140.007	0.521133	1.36991	0.0222765	0.311273	0.734164	2.19973		140.476	0.832736	1.89403	0.585696	0.109536	2.38102	4.69437		140.5	1.19731	0.0195788	0.824291	0.111432	0.00387234	0.038673		140.5	0.342987	2.03176	5.02119	2.28488	0.530355	0.13122
140.507	0.504522	1.29576	-0.0115691	0.284202	0.768573	2.27338		140.976	0.865363	1.91832	0.583973	0.111288	2.2281	4.67832		141	1.12935	0.0195525	0.814608	0.112502	0.00328865	0.0401654		141	0.302995	2.09527	4.77403	2.35153	0.56035	0.132738
141.007	0.498157	1.24819	-0.0148663	0.264821	0.817843	2.31853		141.476	0.901167	1.94442	0.583495	0.113642	2.05529	4.66012		141.5	1.13027	0.0254784	0.799772	0.112694	0.00149357	0.0416599		141.5	0.286559	2.21773	4.41423	2.35428	0.572364	0.13802
141.507	0.50205	1.22123	0.00723215	0.2517	0.877462	2.3392		141.976	0.921821	1.96442	0.586498	0.119858	1.87373	4.65306		142	1.13119	0.0259306	0.789832	0.115303	0.000911256	0.0431566		142	0.287028	2.71452	4.04657	2.3535	0.588041	0.181371
142.007	0.516217	1.20887	0.0495735	0.243412	0.942917	2.3394		142.476	0.936118	1.98187	0.590961	0.127696	1.68848	4.65066		142.5	1.42348	0.0311492	0.788505	0.113078	2.67036e-05	0.0482269		142.5	0.287497	3.11688	3.85117	2.35165	0.622367	0.353255
142.507	0.540671	1.20513	0.107005	0.238527	1.0097	2.32312		142.976	0.966349	1.99689	0.594173	0.146338	1.51844	4.64844		143	2.09548	0.0378026	0.787179	0.11327	-0.000857159	0.0533097		143	0.573538	3.15667	3.77569	2.34981	0.663854	0.535337
143.007	0.575427	1.20401	0.174374	0.235619	1.07329	2.2944		143.476	1.0089	2.01002	0.596417	0.173333	1.36014	4.64635		143.5	2.42477	0.0431499	0.803598	0.113462	-0.0014381	0.0578079		143.5	0.89544	3.25694	3.64298	2.2326	0.748799	0.617601
143.507	0.620497	1.19953	0.246527	0.233258	1.12918	2.25722		143.976	1.02339	2.0195	0.599752	0.206873	1.21219	4.64117		144	2.42625	0.0465927	0.839725	0.116512	-0.00201871	0.0623169		144	1.32502	3.6926	3.49618	2.21767	0.836912	0.671387
144.007	0.675897	1.18569	0.318312	0.230017	1.17286	2.21562		144.476	0.999875	2.02401	0.604566	0.249283	1.07826	4.6318		144.5	2.42774	0.0515901	0.867795	0.118464	-0.00259898	0.0656392		144.5	1.72415	4.3141	3.33532	2.1138	0.836943	0.696578
144.507	0.74164	1.15651	0.384577	0.224467	1.19981	2.17358		144.976	0.965871	2.03162	0.607065	0.303682	0.953423	4.6245		145	2.3155	0.0573082	0.882116	0.118217	-0.00317891	0.068969		145	1.72514	4.71006	3.1085	1.73299	0.836974	0.773188
145.007	0.845998	1.12793	0.415516	0.229694	1.18459	2.12441		145.476	0.905533	2.04696	0.603747	0.388184	0.851436	4.62241		145.5	2.0166	0.0584913	0.897556	0.120169	-0.000140194	0.0759085		145.5	1.72613	5.04972	2.72527	1.967	0.746421	1.16053
145.507	0.820906	1.07682	0.54118	0.202152	1.28024	2.10066		145.976	0.841848	2.06135	0.601139	0.474694	0.752509	4.62166		146	1.6349	0.0646952	0.907555	0.120362	0.00982571	0.0867739		146	1.46772	5.30391	2.41914	1.96537	0.623226	1.64288
146.007	0.783021	1.03021	0.660388	0.183311	1.35478	2.06878		146.476	0.758322	2.07007	0.602736	0.573098	0.671714	4.62887		146.5	1.07693	0.0716217	0.906141	0.120556	0.0179726	0.0910449		146.5	1.20912	5.39102	2.15794	1.54206	0.623254	2.15582
146.507	0.774965	0.986905	0.772376	0.171377	1.41361	2.0302		146.976	0.674923	2.07877	0.60436	0.671479	0.590992	4.63598		147	1.07167	0.0720943	0.904727	0.117447	0.0173808	0.095326		147	1.14156	5.44278	1.85415	1.11921	0.623282	2.92606
147.007	0.839363	0.94572	0.87638	0.164558	1.46214	1.98636		147.476	0.620389	2.08165	0.612033	0.764612	0.52664	4.62239		147.5	1.07257	0.0725672	0.897625	0.115879	0.0167892	0.0984095		147.5	1.09317	5.52907	1.63745	0.848888	0.63047	3.81343
147.507	1.01884	0.905466	0.971635	0.161064	1.50578	1.93872		147.976	0.565855	2.08452	0.619705	0.857744	0.462289	4.6088		148	1.07347	0.0632221	0.884847	0.119374	0.0137928	0.0999877		148	1.16235	6.09808	1.45034	0.721844	0.680956	4.80187
148.007	1.35602	0.864954	1.05738	0.159102	1.54992	1.88872		148.476	0.521154	2.08846	0.638821	0.923148	0.412665	4.58404		148.5	1.50033	0.0489575	0.854189	0.119787	0.00719382	0.101568		148.5	1.16314	7.21688	1.32274	0.677198	0.742935	5.90693
148.507	1.89352	0.822995	1.13284	0.15688	1.59998	1.8378		148.976	0.477991	2.09257	0.659726	0.984216	0.365344	4.55753		149	1.56259	0.0436679	0.817331	0.124826	0.00480639	0.103151		149	1.2212	8.22108	1.2361	0.612747	0.81291	6.96485
149.007	2.67398	0.778401	1.19727	0.152606	1.66136	1.78739		149.476	0.458076	2.09436	0.672552	1.04852	0.326755	4.53376		149.5	1.70153	0.0441282	0.803502	0.134051	0.00422216	0.104736		149.5	1.35137	8.91783	1.1522	0.554903	0.888883	7.76976
149.507	3.74001	0.729982	1.24989	0.144489	1.73945	1.73896		149.976	0.44697	2.09528	0.682317	1.11404	0.291475	4.51103		150	2.12408	0.0445887	0.802165	0.14989	0.00363826	0.108452		150	1.37507	9.3775	1.08418	0.516954	0.923889	8.44679
150.007	3.59389	0.727369	1.30712	0.133816	1.77597	1.67951		150.476	0.446993	2.08991	0.684746	1.17737	0.260352	4.49268		150.5	2.79046	0.057649	0.800829	0.166395	0.00545292	0.110045		150.5	1.37593	9.61652	0.994883	0.426697	0.941908	9.02972
150.507	2.79319	0.686822	1.34841	0.137061	1.81911	1.62974		150.976	0.454916	2.08009	0.681966	1.23914	0.23218	4.47745		151	3.56092	0.0845263	0.817325	0.181364	0.0153544	0.10798		151	1.3768	9.77442	0.884343	0.312068	0.968589	9.52565
151.007	2.28106	0.650088	1.36222	0.138419	1.8418	1.5834		151.476	0.467031	2.07033	0.671946	1.29889	0.203585	4.46618		151.5	4.17647	0.0972551	0.849633	0.189503	0.0228486	0.112626		151.5	1.41801	9.85934	0.805441	0.27571	0.978282	10.0695
151.507	2.01518	0.617068	1.3554	0.13832	1.84985	1.53955		151.976	0.484393	2.06066	0.652858	1.3561	0.17446	4.45986		152	4.17871	0.101344	0.864653	0.189708	0.0222539	0.111472		152	1.47584	10.077	0.756809	0.265581	1.02062	10.2382
152.007	1.95324	0.587663	1.33478	0.137195	1.84909	1.49728		152.476	0.493756	2.05542	0.633932	1.40823	0.150025	4.45772		152.5	4.18095	0.105436	0.867224	0.189913	0.0315292	0.113069		152.5	1.54583	10.3725	0.732164	0.264886	1.11243	10.2533
152.507	2.05292	0.561775	1.30722	0.135475	1.84533	1.45567		152.976	0.484906	2.06027	0.615374	1.4488	0.13627	4.46509		153	4.1832	0.105923	0.874305	0.191442	0.0413911	0.114668		153	1.53016	10.4867	0.731136	0.264191	1.17609	10.2684
153.007	2.27193	0.539305	1.27956	0.133589	1.84439	1.4138		153.476	0.476629	2.06523	0.597369	1.48633	0.123398	4.47312		153.5	3.40618	0.109659	0.905625	0.191647	0.0482539	0.12057		153.5	1.53108	10.4925	0.730109	0.369824	1.19545	9.96936
153.507	2.56794	0.520153	1.25865	0.131968	1.85208	1.37075		153.976	0.471247	2.07076	0.582171	1.50848	0.115004	4.48447		154	1.93408	0.118815	0.931826	0.190308	0.0545113	0.12864		154	1.48934	10.4983	0.738573	0.604025	1.20065	9.63895
154.007	2.89866	0.50422	1.25134	0.131042	1.87422	1.3256		154.476	0.465866	2.07628	0.566973	1.53063	0.106611	4.49582		154.5	0.540761	0.130869	0.930394	0.186321	0.0538982	0.134267		154.5	1.37793	10.3591	0.747025	0.770992	1.20068	9.40767
154.507	3.22176	0.491408	1.26447	0.131242	1.91664	1.27743		154.976	0.462315	2.07964	0.554255	1.54704	0.0984138	4.49795		155	0.0551783	0.137512	0.928963	0.17262	0.0532854	0.137748		155	1.36756	10.0997	0.745989	0.828838	1.20072	9.22973
155.007	3.14803	0.46733	1.28894	0.120895	2.00807	1.24652		155.476	0.46195	2.07925	0.545851	1.55343	0.0905573	4.48403		155.5	0.0556351	0.138014	0.886766	0.162889	0.0493945	0.139382		155.5	1.3392	9.88604	0.744953	0.891605	1.18543	9.07781
155.507	2.70626	0.463194	1.29412	0.119744	1.99997	1.2073		155.976	0.468713	2.07914	0.54092	1.55692	0.0822306	4.46603		156	0.0560922	0.138515	0.823561	0.16309	0.0455078	0.141019		156	1.34005	9.61975	0.673404	0.969369	1.15599	8.96147
156.007	2.34253	0.452016	1.29819	0.11722	2.00055	1.17239		156.476	0.499977	2.08	0.547927	1.55041	0.0722873	4.43401		156.5	0.0565495	0.139018	0.801155	0.16329	0.0407323	0.142969		156.5	1.34091	9.2743	0.474697	1.00465	1.12921	8.80565
156.507	2.04601	0.435413	1.29908	0.114295	2.00615	1.14042		156.976	0.528795	2.08079	0.555339	1.54527	0.0626585	4.40281		157	0.594828	0.125882	0.799819	0.163491	0.0338792	0.144301		157	1.3053	9.00889	0.346656	1.00355	1.12641	8.7111
157.007	1.80583	0.415002	1.29474	0.111943	2.01313	1.11003		157.476	0.531362	2.08097	0.567116	1.55471	0.0564067	4.38029		157.5	1.70063	0.0959526	0.798485	0.168109	0.0311967	0.145323		157.5	1.30614	9.01396	0.345857	1.00986	1.12645	8.65594
157.507	1.61115	0.392399	1.28309	0.111138	2.01783	1.07988		157.976	0.533928	2.08115	0.578893	1.56416	0.0501548	4.35776		158	2.38204	0.0775922	0.811997	0.182671	0.0231677	0.146347		158	1.27591	9.01904	0.342453	1.02749	1.09716	8.53979
158.007	1.45112	0.369222	1.26208	0.112853	2.01662	1.04859		158.476	0.511874	2.07759	0.589988	1.57767	0.0476598	4.33498		158.5	2.77171	0.0760131	0.860755	0.19989	0.0216818	0.147682		158.5	1.16995	9.47851	0.334496	1.06497	1.07771	8.17924
158.507	1.31488	0.347088	1.22964	0.118062	2.00584	1.01482		158.976	0.488399	2.07382	0.601044	1.59141	0.0453819	4.31219		159	3.04868	0.0764877	0.913356	0.216894	0.0210878	0.149331		159	1.06978	10.6417	0.301501	1.16929	1.08074	7.53722
159.007	1.19159	0.327613	1.18371	0.127738	1.98184	0.977204		159.476	0.468734	2.07224	0.59971	1.59061	0.0479525	4.29708		159.5	3.05044	0.0769624	0.951065	0.236114	0.0204941	0.150983		159.5	1.07053	11.5229	0.24156	1.35904	1.08078	7.12799
159.507	1.0704	0.312415	1.12224	0.142856	1.94098	0.934381		159.976	0.44999	2.07118	0.59538	1.58629	0.051696	4.28383		160	3.05219	0.0885699	1.02055	0.246276	0.0703028	0.157957		160	1.07129	11.7938	0.209307	1.50439	1.04633	7.06006
160.007	0.95814	0.324918	1.07182	0.178904	1.89502	0.885304		160.476	0.451463	2.07612	0.586894	1.56708	0.0556415	4.26443		160.5	2.95478	0.111446	1.14715	0.249366	0.139906	0.164635		160.5	1.23087	11.8002	0.20859	1.55225	1.04636	7.07088
160.507	0.782677	0.307503	1.04512	0.169481	1.83364	0.821278		160.976	0.463102	2.08408	0.576319	1.5404	0.0596886	4.24194		161	2.70353	0.125864	1.28415	0.25135	0.181295	0.168505		161	1.47183	11.8067	0.207873	1.55085	1.0494	7.08172
161.007	0.689991	0.29601	1.01996	0.167231	1.78839	0.772323		161.476	0.467988	2.08663	0.56962	1.51946	0.0625291	4.21948		161.5	2.45362	0.132904	1.36187	0.251566	0.190079	0.172385		161.5	1.76263	11.2959	0.2344	1.54945	1.10858	7.46162
161.507	0.662194	0.289019	0.996368	0.170917	1.75624	0.735734		161.976	0.466774	2.0843	0.566422	1.50371	0.0642798	4.19705		162	2.21493	0.14007	1.3888	0.251782	0.189683	0.174384		162	2.0157	9.94784	0.303357	1.48934	1.26539	8.27065
162.007	0.6814	0.285107	0.974357	0.179304	1.73416	0.708805		162.476	0.457553	2.08135	0.5612	1.48792	0.0639606	4.16538		162.5	1.53759	0.153549	1.38703	0.234517	0.188991	0.178278		162.5	2.08819	8.86589	0.364782	1.34978	1.41655	8.71178
162.507	0.729723	0.282853	0.953951	0.191156	1.71911	0.688833		162.976	0.434439	2.07731	0.552468	1.47203	0.0600497	4.11769		163	0.531849	0.169467	1.39555	0.213483	0.182391	0.185337		163	2.40756	8.62033	0.415125	1.15	1.43558	8.72482
163.007	0.789276	0.280836	0.935171	0.205237	1.70805	0.673112		163.476	0.407792	2.07318	0.547254	1.45404	0.0573534	4.06997		163.5	0.0655751	0.178722	1.39377	0.201296	0.181408	0.193995		163.5	2.68194	8.6252	0.618776	0.92171	1.57725	8.73787
163.507	0.842171	0.277635	0.918038	0.220312	1.69794	0.658937		163.976	0.367492	2.06869	0.555633	1.42793	0.0593502	4.02211		164	0.0660364	0.182763	1.38173	0.201503	0.170982	0.201092		164	3.21212	8.62168	0.998098	0.78499	2.0395	8.5945
164.007	0.870524	0.271827	0.902574	0.235143	1.68576	0.643605		164.476	0.328985	2.06391	0.563964	1.40091	0.0612388	3.97532		164.5	0.066498	0.183285	1.36831	0.20171	0.149361	0.20472		164.5	4.46766	8.61816	1.43773	0.741186	2.59274	8.27618
164.507	0.856446	0.261992	0.888798	0.248496	1.66846	0.62441		164.976	0.316005	2.05501	0.571599	1.361	0.0615859	3.94375		165	0.0706084	0.183807	1.34493	0.199924	0.127175	0.206451		165	5.85495	8.54519	1.99828	0.733574	2.95255	7.9901
165.007	0.754042	0.266318	0.824962	0.249162	1.61881	0.620658		165.476	0.303025	2.0461	0.579233	1.3211	0.0619329	3.91219		165.5	0.504403	0.16232	1.32297	0.200131	0.112674	0.208185		165.5	6.94118	8.3065	2.64305	0.692713	3.25388	7.70766
165.507	0.760305	0.238041	0.862778	0.266224	1.60018	0.584526		165.976	0.290573	2.04085	0.593606	1.29052	0.0619669	3.90374		166	1.37574	0.125244	1.31682	0.199895	0.103783	0.21597		166	7.30605	8.14548	3.32255	0.641121	3.53407	7.23863
166.007	0.748904	0.222035	0.872752	0.269824	1.56326	0.569889		166.476	0.278164	2.03589	0.608519	1.26069	0.0619757	3.89714		166.5	1.85119	0.109432	1.28965	0.208965	0.084898	0.223776		166.5	7.30908	8.05508	4.04186	0.622807	3.65995	6.69994
166.507	0.720599	0.218451	0.860102	0.263356	1.51304	0.574622		166.976	0.263298	2.02401	0.62755	1.23141	0.0596921	3.89343		167	2.0477	0.101277	1.24042	0.209174	0.0622113	0.225853		167	7.31211	7.90367	4.90017	0.621915	3.77784	6.33807
167.007	0.676151	0.22744	0.830045	0.250212	1.45451	0.596598		167.476	0.245377	2.00352	0.651705	1.20281	0.0545563	3.89332		167.5	2.36975	0.0912866	1.20423	0.210712	0.0454288	0.231772		167.5	6.91149	7.84723	5.77452	0.632353	3.77793	6.00195
167.507	0.616322	0.249156	0.787797	0.233787	1.39266	0.633694		167.976	0.224864	1.9836	0.670524	1.17543	0.0519243	3.89226		168	2.56143	0.0898181	1.2026	0.214025	0.0351276	0.237064		168	5.98837	7.60682	5.7705	0.64884	3.77801	5.65003
168.007	0.541872	0.283749	0.738576	0.217474	1.33249	0.683785		168.476	0.198466	1.96494	0.67723	1.15081	0.0549763	3.88903		168.5	2.56297	0.0902988	1.20097	0.214234	0.0345258	0.238842		168.5	4.71918	7.05445	5.76648	0.681882	3.77809	5.5749
168.507	0.453563	0.331372	0.687599	0.204666	1.279	0.744745		168.976	0.17273	1.94579	0.683866	1.12648	0.0574849	3.88246		169	2.56451	0.0907796	1.22055	0.214443	0.0301101	0.240622		169	3.07086	6.58835	5.63903	0.725284	3.58802	5.58372
169.007	0.352155	0.392175	0.640081	0.198756	1.23717	0.81445		169.476	0.150324	1.92415	0.690148	1.10363	0.0572559	3.85904		169.5	2.54042	0.0918708	1.21781	0.214209	0.0295112	0.231148		169.5	1.72065	6.3298	4.48046	0.744775	3.28979	5.59256
169.507	0.238411	0.466312	0.601241	0.203139	1.21199	0.890774		169.976	0.128324	1.90317	0.695828	1.08152	0.0572222	3.83557		170	2.29277	0.0923523	1.22497	0.208872	0.0309639	0.220678		170	0.873797	6.14352	3.46101	0.759907	2.96706	5.78539
170.007	0.184093	0.516214	0.56479	0.206369	1.19954	0.964909		170.476	0.121563	1.90678	0.678969	1.08748	0.0645047	3.81039		170.5	1.62959	0.110177	1.22332	0.194214	0.0344649	0.216626		170.5	0.389042	6.04476	2.79445	0.761221	2.81663	6.0842
170.507	0.160213	0.630867	0.537774	0.204953	1.16205	1.0335		170.976	0.114802	1.9104	0.66211	1.09344	0.0717871	3.7852		171	0.772508	0.142801	1.20738	0.193976	0.0347415	0.208361		171	0.389548	5.95236	2.30635	0.762533	2.69737	6.38231
171.007	0.141136	0.73003	0.50906	0.20069	1.12921	1.10376		171.476	0.111396	1.92325	0.644234	1.12166	0.0727397	3.77298		171.5	0.757551	0.158096	1.20575	0.194182	0.0350175	0.207186		171.5	0.390055	5.87628	2.05568	0.761565	2.42994	6.55291
171.507	0.126282	0.815482	0.479371	0.194538	1.09968	1.1752		171.976	0.108422	1.93729	0.626227	1.15274	0.0728762	3.76244		172	0.758312	0.160074	1.20411	0.194387	0.0379242	0.20892		172	0.638551	5.87976	1.9219	0.760597	2.10766	6.64297
172.007	0.11507	0.889005	0.449431	0.187458	1.07213	1.24734		172.476	0.109863	1.94502	0.608876	1.19848	0.0754458	3.75284		172.5	0.759073	0.163033	1.21125	0.243887	0.0408271	0.210657		172.5	0.780258	5.97936	1.77195	0.758605	1.96371	6.79585
172.507	0.106923	0.952378	0.419965	0.180412	1.04521	1.31968		172.976	0.112807	1.95061	0.591749	1.24922	0.0788437	3.74356		173	1.20596	0.164525	1.22468	0.356697	0.0431423	0.214996		173	0.887917	6.00033	1.63913	0.752635	1.9601	7.13308
173.007	0.101258	1.00738	0.391697	0.174359	1.01758	1.39173		173.476	0.126616	1.95356	0.576896	1.30665	0.0795756	3.72862		173.5	1.81601	0.165039	1.24657	0.522632	0.0428276	0.224875		173.5	0.913203	6.27058	1.53077	0.711543	1.96015	7.5495
173.507	0.097497	1.05579	0.36535	0.17026	0.9879	1.46301		173.976	0.147495	1.9548	0.563523	1.36842	0.0785726	3.70999		174	2.56527	0.165553	1.27362	0.691068	0.050097	0.238038		174	1.10165	6.58548	1.37684	0.694697	1.9602	7.86962
174.007	0.0950596	1.0994	0.341648	0.169075	0.95483	1.53302		174.476	0.179898	1.95961	0.557111	1.43196	0.0781048	3.69189		174.5	2.88424	0.166067	1.3236	0.818678	0.0541508	0.246668		174.5	1.17808	6.98827	1.18062	0.693766	1.95925	8.13911
174.507	0.093366	1.13997	0.321316	0.171764	0.917027	1.60127		174.976	0.225529	1.96851	0.55869	1.49755	0.0782513	3.67437		175	2.98634	0.164742	1.39835	0.914775	0.0649007	0.259895		175	1.17888	7.34504	1.01463	0.692835	1.93896	8.31965
175.007	0.0900271	1.18127	0.294499	0.185177	0.882752	1.66377		175.476	0.267282	1.97574	0.561884	1.56014	0.0780456	3.66067		175.5	2.98806	0.166482	1.48718	0.985788	0.0834997	0.269558		175.5	1.20978	7.48788	0.922207	0.766428	1.91968	8.42692
175.507	0.0967194	1.21807	0.287434	0.183046	0.837828	1.74855		175.976	0.30024	1.97915	0.568741	1.61592	0.0770408	3.65561		176	2.98979	0.166996	1.63888	1.04037	0.0962565	0.271383		176	1.13848	7.54741	0.827978	0.947524	1.86222	8.43958
176.007	0.0988249	1.25479	0.275446	0.183653	0.802445	1.8187		176.476	0.326276	1.98011	0.578374	1.66759	0.0761529	3.6495		176.5	2.29292	0.188138	1.83805	1.06741	0.104054	0.273209		176.5	1.10913	7.57674	0.689574	1.18065	1.77425	8.45073
176.507	0.0978324	1.29056	0.259998	0.186535	0.774427	1.87755		176.976	0.317333	1.96875	0.602043	1.69843	0.0758551	3.63816		177	1.45852	0.236567	1.94351	1.1098	0.106318	0.27241		177	1.1099	7.58108	0.604509	1.27809	1.72029	8.52394
177.007	0.0952306	1.32451	0.24255	0.191228	0.751602	1.92844		177.476	0.307866	1.95707	0.626016	1.7289	0.0755648	3.62558		177.5	0.899484	0.274102	1.965	1.18401	0.121072	0.265682		177.5	1.1262	7.58543	0.603557	1.27684	1.69683	8.54741
177.507	0.0925084	1.35577	0.224564	0.19727	0.731793	1.97471		177.976	0.278772	1.93383	0.661353	1.74518	0.0755607	3.56684		178	0.668896	0.29163	1.97695	1.23177	0.143938	0.26025		178	1.1416	7.58627	0.602606	1.27559	1.67788	8.56022
178.007	0.0911545	1.38348	0.207501	0.204199	0.712827	2.01971		178.476	0.249678	1.9106	0.696691	1.76146	0.0755566	3.50809		178.5	0.669619	0.335371	1.99321	1.28021	0.152558	0.25744		178.5	1.15381	7.47238	0.60674	1.05897	1.60157	8.62858
178.507	0.0926577	1.40676	0.192823	0.211551	0.69253	2.06678		178.976	0.219216	1.88286	0.735479	1.79219	0.073511	3.42885		179	0.670342	0.379151	1.991	1.3625	0.153048	0.255942		179	1.19805	7.30699	0.669638	0.640664	1.48042	8.75161
179.007	0.0985067	1.42475	0.18199	0.218865	0.668728	2.11926		179.476	0.188578	1.85454	0.774714	1.82479	0.0712006	3.34694		179.5	0.856856	0.388253	1.98878	1.43903	0.152378	0.256422		179.5	1.4697	7.31119	0.730555	0.416836	1.41661	8.97074
179.507	0.11019	1.43657	0.176464	0.225677	0.639245	2.18049		179.976	0.180428	1.80989	0.807492	1.84575	0.0642117	3.25614		180	0.910465	0.388866	1.9684	1.49444	0.151708	0.25425		180	2.04179	7.3154	0.729528	0.380165	1.41165	9.07851
180.007	0.127542	1.44333	0.170703	0.237031	0.59576	2.25436		180.476	0.179951	1.75968	0.838066	1.86273	0.0556264	3.16231		180.5	0.911292	0.385289	1.87382	1.52314	0.140326	0.252401		180.5	2.42338	7.32062	0.728502	0.370157	1.40669	9.09203
180.507	0.131771	1.45322	0.15291	0.233977	0.564887	2.28782		180.976	0.17434	1.70465	0.865215	1.87859	0.0493494	3.07024		181	0.912119	0.384051	1.80401	1.54251	0.121146	0.251541		181	2.58081	7.56192	0.696102	0.369404	1.3989	9.10558
181.007	0.149992	1.45793	0.137822	0.245153	0.540369	2.32274		181.476	0.165395	1.6465	0.890137	1.8937	0.044572	2.97932		181.5	0.796627	0.371342	1.80193	1.57502	0.112109	0.251675		181.5	2.77318	7.96227	0.634919	0.368652	1.38993	8.95188
181.507	0.17779	1.45897	0.125218	0.268817	0.520677	2.35837		181.976	0.154495	1.58909	0.91417	1.89484	0.0409272	2.87992		182	0.733929	0.368986	1.79985	1.59618	0.103371	0.253473		182	2.87631	8.12695	0.590267	0.438176	1.38381	8.66557
182.007	0.210748	1.45786	0.114879	0.303225	0.504278	2.39399		182.476	0.141357	1.53252	0.937184	1.87998	0.0385785	2.77083		182.5	0.73468	0.36095	1.80696	1.61156	0.0943531	0.255274		182.5	2.92312	8.13157	0.589324	0.565591	1.336	8.28456
182.507	0.24445	1.45612	0.106583	0.346633	0.489643	2.42884		182.976	0.130373	1.48181	0.964797	1.87426	0.039037	2.66388		183	0.735431	0.352906	1.82404	1.65725	0.0899643	0.263765		183	3.03143	8.1362	0.588381	0.693878	1.22733	8.0242
183.007	0.274481	1.45525	0.10011	0.397299	0.475242	2.46219		183.476	0.123838	1.44321	1.00191	1.88742	0.0452945	2.56133		183.5	0.900373	0.341396	1.87724	1.75065	0.0875996	0.278973		183.5	3.10677	7.91825	0.596918	0.791217	1.09815	7.95966
183.507	0.296424	1.45679	0.0952404	0.453479	0.459544	2.49329		183.976	0.115887	1.40485	1.03763	1.89801	0.0506835	2.46061		184	1.18097	0.341987	1.95892	1.83227	0.0869672	0.286175		184	3.12709	7.59326	0.969542	0.833946	0.973135	7.91866
184.007	0.305864	1.46224	0.0917531	0.513429	0.441018	2.52141		184.476	0.101745	1.36758	1.06724	1.89732	0.0522771	2.36791		184.5	1.57472	0.342579	1.95673	1.87802	0.0863352	0.288695		184.5	3.13915	7.41615	1.46796	0.835522	0.864956	7.88687
184.507	0.298384	1.47313	0.0894279	0.575407	0.418134	2.5458		184.976	0.0881257	1.33003	1.09683	1.89667	0.05377	2.27612		185	1.8532	0.344161	1.95454	1.94452	0.0868555	0.290546		185	3.24632	7.26886	1.51066	0.834513	0.804461	7.78913
185.007	0.331548	1.48613	0.0779963	0.642768	0.353881	2.58212		185.476	0.0852504	1.28681	1.12596	1.89671	0.0531962	2.20313		185.5	1.85444	0.450938	1.951	2.06726	0.115869	0.291054		185.5	3.24786	7.06061	1.50917	0.833505	0.760639	7.62985
185.507	0.322492	1.49806	0.0776787	0.691204	0.381245	2.63284		185.976	0.0823751	1.24359	1.1551	1.89674	0.0526223	2.13015		186	1.93317	0.65884	1.89857	2.17709	0.189146	0.292909		186	3.23884	6.98064	1.50768	0.828013	0.730821	7.5705
186.007	0.325521	1.51656	0.0713215	0.721482	0.396541	2.67239		186.476	0.0731925	1.20885	1.18042	1.88193	0.0536636	2.05588		186.5	1.97161	0.852681	1.86393	2.25596	0.256588	0.294766		186.5	3.16635	6.94579	1.32578	0.813897	0.6965	7.58201
186.507	0.338951	1.5379	0.0617569	0.736844	0.401552	2.70259		186.976	0.0633569	1.17498	1.20535	1.86558	0.0548721	1.98147		187	2.01327	0.971347	1.839	2.31186	0.279705	0.310493		187	2.86977	6.87173	1.26493	0.795764	0.683356	7.59353
187.007	0.361095	1.55835	0.0518171	0.740538	0.398057	2.72531		187.476	0.0600277	1.14435	1.22651	1.85824	0.0560072	1.93299		187.5	1.97419	1.0528	1.82912	2.31243	0.286426	0.34455		187.5	2.87118	6.83653	1.26359	0.794777	0.683385	7.60484
187.507	0.390268	1.57418	0.0443347	0.735807	0.387838	2.74239		187.976	0.0586815	1.1147	1.24653	1.85365	0.0571199	1.89241		188	1.88083	1.12155	1.7303	2.32394	0.300602	0.377346		188	2.87259	6.83216	1.26225	0.793791	0.658066	7.58522
188.007	0.424784	1.58167	0.0421417	0.725897	0.372674	2.75567		188.476	0.0625068	1.09437	1.25763	1.85155	0.058276	1.87678		188.5	1.88208	1.2163	1.49055	2.32451	0.325085	0.455067		188.5	2.88643	6.65468	1.36142	0.838652	0.640918	7.51141
188.507	0.462956	1.57709	0.0480707	0.714052	0.354348	2.76701		188.976	0.0694216	1.0796	1.26341	1.85092	0.059458	1.87608		189	1.7886	1.40783	1.28485	2.32509	0.342087	0.626547		189	3.38264	6.48537	1.78976	0.939342	0.640279	7.4284
189.007	0.503099	1.55669	0.0649538	0.703517	0.334639	2.77825		189.476	0.0724282	1.0717	1.26769	1.84776	0.0589097	1.89622		189.5	1.74934	1.59481	1.28316	2.33526	0.610886	0.772289		189.5	4.17048	6.48916	2.78483	1.0187	0.626632	7.23572
189.507	0.543528	1.51677	0.0956235	0.697537	0.315328	2.79125		189.976	0.0713113	1.07104	1.27039	1.84191	0.0565357	1.93838		190	1.75053	1.67175	1.28147	2.48082	1.11329	0.775517		190	4.46651	6.28842	4.01324	1.06961	0.617321	6.87342
190.007	0.537237	1.4463	0.166493	0.670559	0.266783	2.79432		190.476	0.0701943	1.07039	1.2731	1.83606	0.0541618	1.98053		190.5	1.75172	1.67293	1.29152	2.76472	1.33726	0.778069		190.5	4.4685	6.03296	4.87074	1.06847	0.581993	6.48055
190.507	0.569779	1.48526	0.170938	0.694612	0.298249	2.80332		190.976	0.071824	1.09023	1.27684	1.82469	0.0538627	2.03725		191	1.75291	1.67411	1.51307	2.98436	1.3359	0.780623		191	4.47049	5.82722	5.28753	1.06734	0.54066	6.08797
191.007	0.601643	1.5082	0.17342	0.712587	0.309564	2.81813		191.476	0.0742899	1.11632	1.2809	1.81164	0.0541952	2.09839		191.5	1.97917	1.67081	1.77213	3.10172	1.33454	0.618739		191.5	3.90802	5.5083	5.43341	1.06498	0.506497	5.78872
191.507	0.635991	1.5187	0.174583	0.725708	0.305417	2.83638		191.976	0.0722902	1.14745	1.28528	1.79102	0.054469	2.16881		192	2.92593	1.61485	2.00152	3.20034	1.31862	0.460159		192	3.21402	5.2424	5.51092	1.05014	0.452652	5.58454
192.007	0.675986	1.52035	0.175074	0.735196	0.290496	2.85573		192.476	0.0673921	1.18186	1.28988	1.76549	0.0547046	2.24523		192.5	4.00695	1.51676	2.23136	3.31486	1.28615	0.462257		192.5	2.82434	4.87713	5.61554	1.04901	0.356944	5.30512
192.507	0.72479	1.51673	0.175538	0.742273	0.26949	2.87381		192.976	0.0647439	1.21193	1.29006	1.73662	0.0582832	2.31516		193	4.36798	1.43104	2.40395	3.46856	1.01206	0.464358		193	2.58455	4.38946	5.71659	1.04789	0.244053	4.8788
193.007	0.785563	1.51141	0.176622	0.748163	0.247087	2.88829		193.476	0.0649225	1.23653	1.28467	1.70356	0.0660615	2.37691		193.5	4.37031	1.36518	2.47264	3.61404	0.538678	0.471975		193.5	2.42223	3.97252	5.89089	1.08457	0.17369	4.4033
193.507	0.861469	1.50798	0.178971	0.754087	0.227977	2.89681		193.976	0.0685129	1.2582	1.28122	1.66441	0.0907152	2.43856		194	4.37263	1.28817	2.47697	3.6542	0.276452	0.492723		194	2.34534	3.59205	6.22164	1.13533	0.144688	4.12318
194.007	0.955668	1.51002	0.183231	0.761267	0.216847	2.89702		194.476	0.0798271	1.27324	1.28214	1.61148	0.15357	2.49997		194.5	4.40971	1.24801	2.47439	3.65501	0.208777	0.494868		194.5	2.2892	3.37796	6.47559	1.18837	0.128528	3.9005
194.507	1.07132	1.52111	0.190048	0.770925	0.218386	2.88655		194.976	0.0918581	1.28892	1.28341	1.55726	0.209213	2.56116		195	4.44683	1.23241	2.47182	3.65581	0.18274	0.497016		195	2.22747	3.38018	6.47115	1.25944	0.103361	3.64841
195.007	1.1321	1.55446	0.213938	0.815596	0.243377	2.8489		195.476	0.107475	1.30783	1.28644	1.49665	0.228783	2.62126		195.5	4.37373	1.20742	2.46712	3.60513	0.182052	0.462086		195.5	2.19023	3.38239	6.46672	1.32733	0.0611798	3.65465
195.507	1.20354	1.5354	0.202174	0.829794	0.224913	2.87421		195.976	0.123278	1.32677	1.28959	1.43644	0.248226	2.68139		196	4.30056	1.19153	2.46455	3.5334	0.181365	0.443017		196	2.17194	3.5524	6.18771	1.32605	0.0283377	3.6609
196.007	1.24065	1.51888	0.197339	0.844607	0.204378	2.88594		196.476	0.145837	1.34712	1.29714	1.39042	0.263064	2.74215		196.5	4.2209	1.16988	2.46198	3.46903	0.185508	0.440225		196.5	2.04617	3.99352	5.42708	1.32478	0.0138431	3.78531
196.507	1.25123	1.50579	0.198058	0.859894	0.183048	2.88677		196.976	0.168397	1.36748	1.30468	1.34441	0.277903	2.80291		197	3.93272	1.14658	2.48215	3.41606	0.188511	0.433245		197	1.79056	4.30592	4.72488	1.31907	0.00501957	4.17033
197.007	1.24307	1.49703	0.202958	0.875515	0.162199	2.8794		197.476	0.193624	1.386	1.29955	1.30577	0.240718	2.8587		197.5	3.60944	1.14753	2.46636	3.3933	0.194064	0.415089		197.5	1.59549	4.43758	4.23513	1.26033	-0.00213621	4.57086
197.507	1.22396	1.49351	0.210663	0.891329	0.143106	2.86651		197.976	0.219191	1.40428	1.2928	1.26807	0.196892	2.91385		198	3.16198	1.14848	2.46379	3.38846	0.204433	0.405952		198	1.49998	4.50114	3.7879	1.23441	-0.00211923	5.02199
198.007	1.2017	1.49613	0.2198	0.907195	0.127045	2.85077		198.476	0.241012	1.42477	1.29717	1.24279	0.182746	2.94828		198.5	2.89765	1.16345	2.45041	3.36076	0.212237	0.407973		198.5	1.47074	4.57449	3.425	1.21405	-0.00443768	5.3207
198.507	1.18408	1.50579	0.228992	0.922974	0.115293	2.83486		198.976	0.261426	1.44608	1.30572	1.22219	0.179745	2.97492		199	2.89933	1.19734	2.39303	3.30393	0.211532	0.409996		199	1.33288	4.75481	3.14629	1.17359	-0.00442073	5.50126
199.007	1.1789	1.52338	0.236866	0.938524	0.109125	2.82148		199.476	0.276011	1.47204	1.30748	1.19379	0.177127	3.00479		199.5	2.90102	1.19868	2.34758	3.20628	0.210828	0.412022		199.5	0.966056	4.95656	2.87007	1.1724	0.000434058	5.76624
199.507	1.19396	1.54983	0.242046	0.953705	0.109818	2.81331		199.976	0.286491	1.50128	1.30447	1.15992	0.174779	3.03695		200	2.99566	1.19965	2.27746	3.14335	0.210124	0.412295		200	0.737355	5.15826	2.61959	1.17121	0.0281441	6.15026
200.007	1.19273	1.5473	0.24162	0.957461	0.0957736	2.86791		200.476	0.287772	1.52695	1.30293	1.12871	0.174998	3.07131		200.5	2.99739	1.20062	2.21901	3.06088	0.270514	0.405887		200.5	0.717547	5.44802	2.30933	1.22056	0.0800451	6.72152
200.507	1.14005	1.49564	0.219178	0.94824	0.0821512	2.8095		200.976	0.27766	1.54821	1.30319	1.10079	0.178393	3.10842		201	2.99912	1.16947	2.21663	3.00978	0.389912	0.399457		201	0.568524	5.93516	1.92083	1.2961	0.124774	7.43315
201.007	1.10471	1.46331	0.205133	0.941014	0.0730771	2.76737		201.476	0.269029	1.56696	1.29927	1.07772	0.18242	3.14555		201.5	2.99978	1.13855	2.21424	3.01048	0.453233	0.399		201.5	0.393822	6.56228	1.58538	1.29484	0.165834	7.95439
201.507	1.08166	1.44694	0.197749	0.935314	0.0675934	2.73906		201.976	0.264078	1.57948	1.28495	1.06671	0.188018	3.1827		202	2.35728	1.12769	2.273	3.01117	0.455212	0.40101		202	0.380843	7.0515	1.32234	1.29358	0.208898	8.21228
202.007	1.06586	1.44316	0.19529	0.930669	0.0647423	2.72209		202.476	0.259126	1.59199	1.27063	1.05569	0.193616	3.21985		202.5	1.15857	1.12398	2.4321	3.05538	0.454366	0.403023		202.5	0.381346	7.22139	1.10934	1.25213	0.245623	8.41606
202.507	1.05225	1.4486	0.19602	0.92661	0.0635658	2.714		202.976	0.260086	1.58511	1.25722	1.04448	0.191714	3.23458		203	0.519574	1.12027	2.51235	3.08233	0.455776	0.414246		203	0.38185	7.29592	1.01794	1.18277	0.303706	8.58652
203.007	1.0358	1.45989	0.198204	0.922668	0.0631061	2.71233		203.476	0.261798	1.57576	1.24393	1.03325	0.188858	3.24646		203.5	0.47227	1.11165	2.56316	3.08304	0.45493	0.430107		203.5	0.467092	7.37052	1.00749	1.10381	0.375972	8.68214
203.507	1.01145	1.47365	0.200105	0.918372	0.0624052	2.7146		203.976	0.26876	1.5738	1.24997	1.01707	0.187077	3.23915		204	0.472907	1.11044	2.6861	3.08374	0.454084	0.432162		204	1.37587	7.40432	0.962197	1.0357	0.454914	8.77145
204.007	0.974165	1.48651	0.199989	0.913254	0.0605052	2.71836		204.476	0.277503	1.57434	1.26257	0.999209	0.18566	3.22533		204.5	0.473545	1.0755	2.83343	3.02361	0.473508	0.43422		204.5	3.0951	7.495	0.961033	0.736174	0.518509	8.78456
204.507	0.918893	1.49511	0.19612	0.906842	0.0564483	2.72113		204.976	0.281724	1.56387	1.2778	0.975752	0.186043	3.19804		205	1.00893	1.02618	2.98733	2.85881	0.619523	0.422035		205	3.83817	7.56724	0.959869	0.573909	0.59729	8.7977
205.007	0.926304	1.57343	0.17122	0.911986	0.0937965	2.71057		205.476	0.283013	1.54627	1.29475	0.948663	0.187592	3.162		205.5	1.54153	1.00075	3.16241	2.70092	0.745121	0.401253		205.5	3.83993	7.58265	1.03813	0.573045	0.705106	8.75091
205.507	0.832089	1.54062	0.1766	0.873268	0.0749868	2.72896		205.976	0.290402	1.52545	1.31269	0.922694	0.192156	3.12021		206	1.54803	0.990542	3.29392	2.60227	0.744106	0.395766		206	3.8417	7.60812	1.16674	0.572181	0.752023	8.5882
206.007	0.779629	1.52045	0.176107	0.838715	0.0653192	2.73248		206.476	0.304759	1.50096	1.33177	0.898003	0.200162	3.07183		206.5	1.9857	0.978687	3.36399	2.57167	0.74562	0.397772		206.5	3.57189	7.61248	1.22511	0.692457	0.760396	8.52495
206.507	0.760464	1.51012	0.171998	0.808794	0.0624709	2.72528		206.976	0.319475	1.46938	1.34449	0.874787	0.208225	3.01458		207	2.32861	0.977668	3.39305	2.5588	0.744605	0.39978		207	3.24681	7.5957	1.26773	0.697663	0.771773	8.27722
207.007	0.766134	1.50682	0.166531	0.78397	0.0641194	2.71154		207.476	0.334931	1.42322	1.34412	0.854606	0.216401	2.93905		207.5	2.33005	0.967184	3.43508	2.54593	0.74359	0.411118		207.5	3.24836	7.5789	1.26638	0.696731	0.786153	7.96925
207.507	0.788176	1.50775	0.161963	0.764712	0.0679422	2.69543		207.976	0.350131	1.37748	1.34461	0.834908	0.224597	2.86072		208	2.33149	0.931695	3.53062	2.4872	0.767811	0.435775		208	3.24991	7.42321	1.30248	0.695798	1.24942	7.74799
208.007	0.818132	1.5101	0.160552	0.751486	0.0716166	2.68112		208.476	0.364058	1.33378	1.34935	0.817615	0.232886	2.76837		208.5	2.23767	0.886955	3.58782	2.34819	0.766783	0.456185		208.5	3.36454	7.21262	1.79496	0.694648	2.0351	7.36643
208.507	0.84754	1.51107	0.164555	0.744758	0.07282	2.67276		208.976	0.377558	1.29017	1.3543	0.800431	0.241117	2.67602		209	2.23908	0.887787	3.58442	2.25658	0.760995	0.466923		209	4.92934	6.82405	2.67249	0.653484	2.41229	6.89083
209.007	0.86794	1.50786	0.17623	0.744995	0.0692298	2.67453		209.476	0.375784	1.25015	1.36664	0.787163	0.247289	2.58385		209.5	2.24048	0.888619	3.58102	2.24522	0.782642	0.469752		209.5	6.20534	6.51109	3.23188	0.604825	2.41635	6.6477
209.507	0.870872	1.49766	0.197833	0.752665	0.0585235	2.69059		209.976	0.374011	1.21013	1.37898	0.773896	0.253461	2.49167		210	2.24188	0.937128	3.56569	2.23003	0.786361	0.475115		210	6.20797	6.5149	3.39931	0.589637	2.41641	6.65797
210.007	0.760348	1.44385	0.245079	0.733893	0.0534975	2.70463		210.476	0.36666	1.17051	1.3821	0.758886	0.255376	2.41264		210.5	2.24329	1.08613	3.37678	2.23059	0.828376	0.499667		210.5	6.21059	6.5187	3.3967	0.581997	2.41647	6.66825
210.507	0.826739	1.46743	0.246797	0.731264	0.0518551	2.68654		210.976	0.358601	1.13093	1.38406	0.743656	0.25675	2.33528		211	2.24469	1.27198	3.00819	2.23115	0.846871	0.646025		211	5.3008	6.864	3.39409	0.581128	2.23762	6.67854
211.007	0.858383	1.46754	0.249672	0.721123	0.0531142	2.6684		211.476	0.379584	1.09033	1.38823	0.728149	0.258835	2.25608		211.5	2.25206	1.50521	2.73122	2.24701	0.845798	0.892583		211.5	3.78668	7.43033	3.1974	0.580259	2.00837	6.921
211.507	0.861954	1.45066	0.253265	0.70519	0.056632	2.65017		211.976	0.410393	1.04938	1.39316	0.712549	0.261159	2.17626		212	2.34848	1.7778	2.72845	2.39995	0.844724	1.01776		212	2.53991	7.77436	2.79689	0.579391	1.85087	7.3265
212.007	0.844127	1.42326	0.257136	0.685186	0.061766	2.63177		212.476	0.430382	1.01428	1.39638	0.696097	0.271	2.09351		212.5	2.439	1.99373	2.72568	2.56803	0.79261	1.02065		212.5	1.66152	7.89782	2.52141	0.58484	1.72041	7.60494
212.507	0.811579	1.39183	0.260847	0.662831	0.0678736	2.61315		212.976	0.443378	0.982961	1.3985	0.679094	0.285699	2.00887		213	2.46059	2.05565	2.75106	2.76724	0.73275	1.02356		213	1.66249	8.0009	2.29721	0.590174	1.6577	7.73711
213.007	0.770985	1.36284	0.263958	0.639845	0.0743122	2.59424		213.476	0.45326	0.955849	1.4047	0.663045	0.308265	1.92939		213.5	2.4947	2.057	2.98174	3.00233	0.676023	0.990702		213.5	1.66346	8.18871	2.08852	0.604531	1.65775	7.81271
213.507	0.729019	1.34276	0.266031	0.617949	0.0804392	2.57499		213.976	0.459588	0.933533	1.41557	0.648083	0.339808	1.8558		214	2.49622	2.05835	3.26441	3.12217	0.650547	0.914259		214	1.8948	8.27023	1.98277	0.620067	1.65779	7.87263
214.007	0.692359	1.33809	0.266626	0.598863	0.085612	2.55534		214.476	0.464294	0.911008	1.426	0.632892	0.372478	1.78282		214.5	2.49773	1.99685	3.59791	3.21007	0.6443	0.866138		214.5	2.5473	8.30844	1.92831	0.620699	1.67436	7.88454
214.507	0.667679	1.35529	0.265305	0.584307	0.0891879	2.53523		214.976	0.43622	0.884228	1.42747	0.613065	0.427863	1.72233		215	2.36535	1.94508	3.78549	3.34644	0.628326	0.832535		215	2.74344	8.33889	1.86905	0.630886	1.70712	7.89647
215.007	0.641264	1.39468	0.268135	0.583607	0.0785842	2.49854		215.476	0.408147	0.857448	1.42895	0.593238	0.483248	1.66183		215.5	2.18276	1.92084	3.78194	3.60184	0.610147	0.784517		215.5	2.75373	8.34362	1.80468	0.641822	1.72336	7.86688
215.507	0.617457	1.38635	0.253647	0.56649	0.0890346	2.50115		215.976	0.383665	0.826035	1.43741	0.57816	0.537804	1.60377		216	2.14655	1.885	3.7784	3.89069	0.568654	0.749223		216	2.86129	8.34835	1.76411	0.641463	1.7234	7.8372
216.007	0.612767	1.38186	0.242675	0.564104	0.0941323	2.49605		216.476	0.359549	0.794151	1.44658	0.563566	0.592275	1.54596		216.5	2.14791	1.8747	3.7294	4.02454	0.492228	0.709406		216.5	2.86269	8.3195	1.7257	0.640561	1.72345	7.72779
216.507	0.623298	1.38097	0.234494	0.572862	0.0950929	2.48535		216.976	0.343332	0.764097	1.46087	0.553162	0.634655	1.4903		217	2.14927	1.87431	3.5678	4.02857	0.429486	0.683478		217	2.8641	8.25859	1.56983	0.639118	1.63603	7.49663
217.007	0.64515	1.38342	0.228382	0.589179	0.0931318	2.4712		217.476	0.329513	0.7346	1.47671	0.544029	0.673367	1.43529		217.5	2.15718	1.86731	3.36003	4.02943	0.386505	0.685897		217.5	2.52825	7.86924	1.30671	0.620346	1.40472	7.50803
217.507	0.674428	1.38899	0.223612	0.609468	0.0894645	2.45572		217.976	0.317501	0.710205	1.48964	0.536536	0.690246	1.38272		218	2.18856	1.86857	3.14539	4.0303	0.347731	0.688319		218	1.37859	7.87373	1.09789	0.584815	1.21146	7.51945
218.007	0.707234	1.39741	0.219462	0.630142	0.0853065	2.44104		218.476	0.306563	0.688845	1.50085	0.530018	0.694137	1.33162		218.5	2.29149	1.86984	2.90725	3.9583	0.327836	0.747017		218.5	1.28014	7.85396	1.09664	0.583944	1.13003	7.47467
218.507	0.73967	1.40845	0.215207	0.647615	0.0818731	2.42929		218.976	0.308839	0.668787	1.50147	0.518695	0.696801	1.28316		219	2.37102	1.89137	2.72038	3.81227	0.327064	0.999407		219	1.28097	8.12937	1.0954	0.583074	1.07131	7.51699
219.007	0.76784	1.42186	0.210122	0.6583	0.08038	2.42261		219.476	0.325	0.650097	1.49096	0.50232	0.698176	1.23748		219.5	2.37248	1.9976	2.51615	3.66596	0.326292	1.44038		219.5	1.2818	8.13399	1.09416	0.631486	1.04463	7.52842
219.507	0.787845	1.4374	0.203483	0.658612	0.0820425	2.42311		219.976	0.339974	0.630705	1.47786	0.486006	0.705308	1.19376		220	2.37394	2.24196	2.16122	3.54172	0.334645	1.93951		220	1.89146	7.97036	1.38036	0.767444	1.0445	7.53987
220.007	0.74875	1.43384	0.191292	0.603616	0.0847453	2.42963		220.476	0.352718	0.609997	1.4599	0.469806	0.723235	1.15369		220.5	2.33329	2.54934	1.75345	3.40254	0.37753	2.44081		220.5	2.63403	7.97491	2.21749	0.836752	1.04437	7.2817
220.507	0.785738	1.43874	0.196481	0.614492	0.0711335	2.4113		220.976	0.36404	0.588993	1.44344	0.453737	0.745577	1.11208		221	2.10767	2.84613	1.46491	3.20732	0.420089	3.01402		221	3.81523	7.68471	3.29178	0.852575	1.00567	6.98778
221.007	0.80565	1.43149	0.197468	0.626744	0.0627603	2.39232		221.476	0.369936	0.56686	1.43269	0.43817	0.784748	1.0646		221.5	1.73134	3.23708	1.36061	2.97883	0.446588	3.87266		221.5	4.58593	7.41855	3.98905	0.862233	0.923735	6.79266
221.507	0.81412	1.41529	0.195134	0.638891	0.0585695	2.37256		221.976	0.374194	0.545343	1.4222	0.423309	0.82146	1.01746		222	1.35796	3.72564	1.2697	2.80492	0.483539	4.97682		222	4.59174	7.09556	4.3456	0.86121	0.867338	6.60511
222.007	0.81678	1.39334	0.190359	0.649451	0.0575046	2.3519		222.476	0.355943	0.532301	1.41529	0.418154	0.824362	0.975122		222.5	1.1771	4.21424	1.12191	2.69014	0.52596	6.12385		222.5	4.59378	6.65622	4.49659	0.860188	0.822794	6.35604
222.507	0.819262	1.36884	0.184027	0.656943	0.0585094	2.33022		222.976	0.337691	0.519258	1.40838	0.412998	0.827265	0.932787		223	1.17804	4.61296	1.00994	2.5943	0.555933	7.32366		223	4.59582	5.9845	4.59463	0.829236	0.750533	5.94839
223.007	0.8272	1.34498	0.177017	0.659886	0.0605276	2.3074		223.476	0.333593	0.50691	1.40404	0.409118	0.791064	0.89616		223.5	1.15596	4.87407	0.902971	2.50046	0.56742	8.60127		223.5	3.74039	5.39652	4.7254	0.804452	0.683445	5.36253
223.507	0.846225	1.32496	0.170213	0.656799	0.0625028	2.28331		223.976	0.3306	0.494616	1.39991	0.405337	0.751811	0.859979		224	1.13385	5.09432	0.780665	2.43122	0.56871	9.73999		224	2.92971	5.22348	4.82319	0.802062	0.64524	4.79188
224.007	0.881971	1.31196	0.164494	0.6462	0.0633788	2.25784		224.476	0.339065	0.479188	1.37152	0.405886	0.69287	0.825288		224.5	1.12545	5.30579	0.643819	2.32421	0.570273	10.552		224.5	2.40163	5.22663	4.99038	0.801072	0.589501	4.51944
224.507	0.940071	1.3092	0.160743	0.626608	0.0620993	2.23086		224.976	0.350616	0.462916	1.33659	0.407601	0.628625	0.790998		225	1.11703	5.40891	0.517066	2.13441	0.571285	11.1691		225	2.05951	5.13341	5.2846	0.800083	0.501537	4.32204
225.007	1.05931	1.32639	0.17149	0.63553	0.0732366	2.22878		225.476	0.379685	0.445519	1.29692	0.411076	0.576892	0.759807		225.5	1.11795	5.42391	0.454361	2.00808	0.575866	11.6655		225.5	1.91774	5.0401	5.42156	0.826794	0.432437	3.97283
225.507	0.977041	1.31039	0.157011	0.683072	0.0592516	2.19564		225.976	0.41827	0.427511	1.25468	0.415505	0.531956	0.7303		226	1.11887	5.43495	0.414538	1.9645	0.587305	12.1301		226	1.8516	4.86704	5.41775	0.915926	0.367175	3.68326
226.007	0.911603	1.29875	0.14963	0.713543	0.0513819	2.17116		226.476	0.458935	0.410795	1.2063	0.420501	0.487639	0.699951		226.5	1.15827	5.446	0.361363	1.91321	0.593243	12.5081		226.5	1.66231	4.53206	5.41394	1.0352	0.284211	3.68955
226.507	0.861948	1.29038	0.147947	0.73032	0.0476475	2.15447		226.976	0.507522	0.398998	1.13455	0.427648	0.44568	0.6664		227	1.2384	5.44885	0.306496	1.84674	0.592316	12.6371		227	1.3412	4.53487	5.15808	1.10151	0.213267	3.69585
227.007	0.827029	1.28423	0.150558	0.736785	0.0460683	2.1447		227.476	0.553422	0.387519	1.0628	0.434164	0.404871	0.633557		227.5	1.32135	5.45169	0.258026	1.7902	0.595502	12.6567		227.5	1.33969	4.53767	4.59782	1.10035	0.184901	3.78642
227.507	0.805797	1.2792	0.156062	0.736316	0.0446642	2.14097		227.976	0.562245	0.380424	0.991153	0.431964	0.379941	0.610472		228	1.40547	5.4192	0.221494	1.71577	0.605258	12.6763		228	1.34054	4.55417	4.02444	1.0992	0.180245	4.12338
228.007	0.797206	1.27423	0.163056	0.732294	0.0414552	2.14242		228.476	0.571067	0.373329	0.919503	0.429765	0.355011	0.587387		228.5	1.50784	5.34761	0.189052	1.58358	0.61637	12.5756		228.5	1.34139	4.73276	3.69496	1.07225	0.180265	4.46699
228.507	0.800207	1.26824	0.170138	0.728098	0.034461	2.14816		228.976	0.553355	0.362231	0.851276	0.427603	0.341265	0.564762		229	1.59102	5.26052	0.156657	1.47286	0.637867	12.3608		229	1.48787	4.87197	3.37815	1.01047	0.180285	4.84181
229.007	0.813752	1.26015	0.175905	0.727108	0.0217017	2.15732		229.476	0.53359	0.350823	0.783312	0.425445	0.328385	0.542172		229.5	1.63017	5.2059	0.139425	1.42369	0.668089	12.228		229.5	1.48877	5.13004	2.83253	0.968537	0.181808	5.39483
229.507	0.836793	1.24889	0.178955	0.732703	0.00119712	2.16902		229.976	0.491335	0.339629	0.723079	0.427331	0.315264	0.518641		230	1.67266	5.15458	0.131532	1.36703	0.687343	12.1926		230	1.48968	5.25719	2.36172	0.945768	0.196023	6.06404
230.007	0.860392	1.21464	0.193262	0.772607	-0.0135066	2.19903		230.476	0.443037	0.328492	0.664923	0.430303	0.302079	0.494857		230.5	1.72512	5.03445	0.119876	1.27978	0.708213	12.1311		230.5	1.43693	5.26907	2.12484	0.944699	0.217419	6.84662
230.507	0.904939	1.23491	0.186044	0.76823	-0.0180475	2.19542		230.976	0.414363	0.318112	0.620864	0.432689	0.287654	0.472383		231	1.77984	4.96175	0.105724	1.19951	0.748986	12.0398		231	0.977995	5.4976	1.92917	0.943631	0.258021	7.62349
231.007	0.918304	1.24224	0.193051	0.770917	-0.0219668	2.18879		231.476	0.396359	0.308143	0.584469	0.434757	0.272555	0.450621		231.5	1.85999	4.96438	0.0910898	1.14913	0.796258	12.0128		231.5	0.568147	5.99916	1.70357	0.982453	0.294784	7.9841
231.507	0.908432	1.2399	0.209779	0.779329	-0.0250878	2.17994		231.976	0.379538	0.299299	0.550573	0.430305	0.28036	0.432929		232	1.91205	4.95631	0.0779825	1.12389	0.846475	11.9234		232	0.53259	6.39146	1.51911	1.09766	0.313678	8.1733
232.007	0.883264	1.23118	0.231725	0.792126	-0.0272337	2.16968		232.476	0.363956	0.291634	0.519295	0.419018	0.312176	0.419504		232.5	1.95144	4.91056	0.0608814	1.0762	0.933147	11.8337		232.5	0.533149	6.67012	1.29433	1.20699	0.344096	8.49617
232.507	0.850744	1.21938	0.254384	0.807967	-0.0282275	2.15879		232.976	0.348246	0.283622	0.488046	0.406045	0.366743	0.411213		233	2.02237	4.87548	0.0412988	0.984508	1.03116	11.8328		233	0.533708	7.01551	1.07487	1.21143	0.372344	8.67465
233.007	0.818816	1.20778	0.273252	0.825514	-0.0278927	2.14807		233.476	0.332297	0.27496	0.456851	0.389919	0.463863	0.412524		233.5	2.07567	4.87807	0.0290071	0.916822	1.0757	11.8134		233.5	0.628969	7.19862	0.950962	1.21021	0.418463	8.68763
233.507	0.795421	1.19967	0.283826	0.843426	-0.0260522	2.13832		233.976	0.31672	0.267709	0.426656	0.373478	0.578929	0.418563		234	2.11961	4.88067	0.0217379	0.900596	1.08891	11.8132		234	1.24321	7.20462	0.840292	1.209	0.492811	8.7425
234.007	0.788504	1.19835	0.281601	0.860364	-0.0225293	2.13033		234.476	0.302744	0.266537	0.400771	0.355682	0.771304	0.444971		234.5	2.1431	4.88326	0.0177297	0.89684	1.10184	11.8316		234.5	1.81503	7.31351	0.783286	1.08053	0.564989	8.75557
234.507	0.806007	1.2071	0.262073	0.874988	-0.0171473	2.1249		234.976	0.288404	0.266158	0.375192	0.337701	0.966329	0.472712		235	2.18655	4.88585	0.0122276	0.893083	1.13431	11.8501		235	1.9909	7.47449	0.782229	0.882831	0.638172	8.75875
235.007	0.615526	1.23093	0.258968	0.860976	-0.010199	2.10199		235.476	0.266889	0.281436	0.355649	0.31607	1.21369	0.526795		235.5	2.18793	4.88845	0.0114771	0.89341	1.22241	11.8398		235.5	2.13306	7.57167	0.781171	0.811286	0.703007	8.70485
235.507	0.860307	1.21239	0.245455	0.874612	-0.00124598	2.14705		235.976	0.245375	0.296714	0.336106	0.294439	1.46105	0.580878		236	2.23144	4.89079	0.0107272	0.879438	1.36224	11.7321		236	2.18855	7.61505	0.801193	0.810291	0.771017	8.70283
236.007	0.867326	1.20672	0.232648	0.877521	0.00407906	2.17665		236.476	0.234054	0.340388	0.322452	0.277242	1.71399	0.655825		236.5	2.23284	4.86996	0.011723	0.849571	1.52226	11.5738		236.5	2.60989	7.61941	0.86273	0.809296	0.856234	8.63489
236.507	0.735592	1.21022	0.222721	0.871747	0.00838143	2.1928		236.976	0.22376	0.386925	0.309392	0.260492	1.9675	0.732876		237	2.23424	4.86374	0.0294086	0.829911	1.63925	11.5192		237	2.61121	7.62378	0.990023	0.860674	1.12068	8.44398
237.007	0.564114	1.21923	0.217847	0.859336	0.0142664	2.19752		237.476	0.237579	0.447787	0.301699	0.251123	2.11314	0.810909		237.5	2.27782	4.80465	0.0410927	0.744619	1.65858	11.52		237.5	2.718	7.59038	1.2529	0.859652	1.71755	8.16548
237.507	0.451902	1.23006	0.220199	0.842332	0.0243393	2.19284		237.976	0.258657	0.512963	0.295623	0.243977	2.2263	0.889237		238	2.32254	4.77299	0.0567391	0.576174	1.65703	11.5274		238	4.71559	7.30897	1.74351	0.85863	2.34299	7.83389
238.007	0.497964	1.23903	0.231949	0.822779	0.0412054	2.18076		238.476	0.286449	0.582363	0.290272	0.240306	2.27568	0.975883		238.5	2.37231	4.771	0.0882707	0.458098	1.65549	11.5454		238.5	6.74854	7.06507	2.48426	0.857609	2.71088	7.51141
238.507	0.801309	1.24247	0.255271	0.802724	0.06747	2.16331		238.976	0.323967	0.657883	0.28597	0.241669	2.2327	1.07457		239	2.44768	4.74863	0.0961576	0.404959	1.60932	11.5634		239	6.75136	6.88538	3.42796	0.799677	2.953	7.14228
239.007	1.46095	1.2367	0.292338	0.78421	0.105738	2.14251		239.476	0.374403	0.726583	0.280903	0.241795	2.16185	1.17333		239.5	2.44917	4.72625	0.0953449	0.37907	1.56726	11.5815		239.5	6.75419	6.59705	4.14554	0.652366	3.1592	6.63543
239.507	2.57589	1.21803	0.345322	0.769282	0.158616	2.12036		239.976	0.460017	0.776712	0.273749	0.238552	2.01512	1.27224		240	2.45067	4.68294	0.0945328	0.379308	1.53578	11.5996		240	6.21432	6.34228	4.64392	0.472354	3.29125	6.05604
240.007	5.5069	1.23291	0.412069	0.786026	0.269704	2.08249		240.476	0.539723	0.824349	0.266674	0.234703	1.87031	1.36872		240.5	2.4121	4.54644	0.0825685	0.379546	1.53431	11.5648		240.5	4.85468	6.03097	5.14288	0.359389	3.42881	5.44307
240.507	4.76591	1.19807	0.475958	0.754364	0.300326	2.06729		240.976	0.579326	0.855076	0.260125	0.226747	1.73842	1.44874		241	2.34677	4.40605	0.0728502	0.387059	1.53283	11.4897		241	4.23525	5.71027	5.51227	0.278213	3.59293	4.90574
241.007	4.10222	1.16773	0.50753	0.725783	0.319045	2.05681		241.476	0.61893	0.885803	0.253577	0.218791	1.60654	1.52875		241.5	2.22737	4.22563	0.0480499	0.440734	1.5737	11.4463		241.5	3.61823	5.42929	5.95054	0.219596	3.70477	4.5422
241.507	3.51218	1.14635	0.515579	0.699886	0.329398	2.0496		241.976	0.62155	0.914557	0.248624	0.210123	1.53028	1.58997		242	2.00033	4.01239	0.0185872	0.521037	1.67947	11.4432		242	3.33117	4.94258	6.24975	0.195835	3.76717	4.27929
242.007	2.99216	1.13843	0.5089	0.67628	0.33492	2.04416		242.476	0.623743	0.943287	0.243689	0.201446	1.45466	1.65097		242.5	1.89405	3.8924	0.000287441	0.559059	1.72047	11.4591		242.5	3.19144	4.26882	6.44253	0.166832	3.83859	4.1104
242.507	2.53852	1.14842	0.496288	0.65457	0.339147	2.03902		242.976	0.557504	0.975199	0.244874	0.191584	1.41194	1.70558		243	1.8953	3.86735	-0.00786188	0.559327	1.71969	11.475		243	3.08275	3.97197	6.6981	0.105106	3.88695	3.91843
243.007	2.14761	1.18082	0.48654	0.63436	0.345614	2.03271		243.476	0.479056	1.00768	0.247151	0.181511	1.3751	1.75904		243.5	1.89656	3.86949	-0.00859745	0.559596	1.71811	11.4858		243.5	3.06267	3.97449	6.83713	0.044185	3.88704	3.59399
243.507	1.81579	1.2401	0.488449	0.615256	0.357858	2.02373		243.976	0.405425	1.03254	0.246908	0.172013	1.35885	1.82184		244	1.89781	3.87164	-0.00933248	0.559865	1.71169	11.4966		244	2.97735	3.97701	6.85718	0.0215188	3.88712	3.2572
244.007	1.53943	1.33073	0.51081	0.596864	0.379413	2.01063		244.476	0.333774	1.05427	0.245629	0.162752	1.35107	1.88847		244.5	1.99455	3.91707	-0.0029221	0.555581	1.68727	11.5006		244.5	2.83009	4.05184	6.85252	0.0209576	3.82522	3.0051
244.507	1.31488	1.45719	0.56242	0.578788	0.413815	1.99192		244.976	0.281882	1.07439	0.245477	0.154459	1.34725	1.95408		245	1.99584	3.94285	0.000277732	0.557899	1.67362	11.3887		245	2.72207	4.29236	6.84786	0.0203967	3.66757	2.78967
245.007	1.66699	1.52204	0.648204	0.565202	0.4774	1.9712		245.476	0.246249	1.09319	0.246252	0.146963	1.34668	2.01887		245.5	2.15138	3.95207	0.000520161	0.558167	1.67207	11.1801		245.5	2.60965	4.32882	6.80416	0.0248775	3.49205	2.5543
245.507	0.904563	1.48629	0.723303	0.542195	0.502786	1.9325		245.976	0.221725	1.11429	0.248974	0.138463	1.35713	2.09088		246	2.24835	3.95843	0.0037116	0.565724	1.67052	11.087		246	2.43039	4.33152	6.73939	0.0342868	3.39237	2.3513
246.007	0.848984	1.45613	0.815599	0.523736	0.544705	1.88443		246.476	0.213279	1.1387	0.254515	0.128512	1.38351	2.17338		246.5	2.30625	3.96062	0.00198487	0.579888	1.71883	11.1016		246.5	2.12273	4.33422	6.64449	0.0510294	3.29504	2.22646
246.507	1.2937	1.42915	0.918471	0.508753	0.599608	1.83		246.976	0.208302	1.16241	0.260541	0.119119	1.41229	2.25641		247	2.30769	3.96699	-0.00145809	0.594741	1.78343	11.1053		247	1.65385	4.13661	6.50897	0.0653416	3.04363	2.07815
247.007	2.03216	1.40294	1.0253	0.496179	0.66395	1.77225		247.476	0.212757	1.18421	0.267883	0.111246	1.44759	2.34094		247.5	2.32871	3.96918	-0.00219842	0.609599	1.85894	11.1042		247.5	1.39904	3.85284	6.31855	0.0739786	2.70801	1.89341
247.507	2.85781	1.37507	1.12947	0.484944	0.734184	1.71419		247.976	0.222568	1.20536	0.274809	0.104221	1.49345	2.42502		248	2.33015	3.97137	0.000738292	0.617853	1.94827	11.103		248	1.29844	3.54888	5.98318	0.0751691	2.46829	1.7374
248.007	3.56411	1.34314	1.22437	0.473978	0.806763	1.65886		248.476	0.268532	1.22208	0.278914	0.102922	1.61059	2.50615		248.5	2.47279	3.97356	0.0144464	0.632264	2.01904	11.0631		248.5	1.24299	3.47535	5.81055	0.0745785	2.38212	1.55986
248.507	3.94451	1.30474	1.30337	0.462212	0.878141	1.60928		248.976	0.314495	1.23881	0.283019	0.101624	1.72773	2.58728		249	2.65984	3.99788	0.052852	0.671073	2.13545	10.9439		249	1.19856	3.47762	5.80651	0.0690707	2.38218	1.38819
249.007	3.79246	1.25744	1.35985	0.448577	0.94477	1.56847		249.476	0.365376	1.24805	0.285543	0.0973019	1.8554	2.66571		249.5	3.04949	4.01619	0.118346	0.864491	2.15553	10.6033		249.5	1.19936	3.47989	5.80247	0.0684833	2.38224	1.29116
249.507	2.9014	1.19883	1.3872	0.432004	1.0031	1.53947		249.976	0.416312	1.25721	0.288048	0.0929459	1.98318	2.7441		250	3.39516	4.0184	0.262674	1.21533	2.1537	10.1454		250	1.20017	3.73317	5.86121	0.0627753	2.38647	1.20684
250.007	2.68062	1.16761	1.41262	0.399404	1.01565	1.47281		250.476	0.47329	1.27413	0.29275	0.0878617	2.1628	2.8077		250.5	3.48519	4.02061	0.526441	1.56128	2.15186	9.94348		250.5	1.24626	4.18584	5.85714	0.0570732	2.45104	1.07429
250.507	2.43446	1.12788	1.4339	0.381987	1.06158	1.43564		250.976	0.531518	1.29265	0.297906	0.0826268	2.35313	2.86823		251	4.31313	3.90181	0.760536	1.8843	2.07455	9.7755		251	1.53483	4.18847	5.85308	0.0509594	2.64562	0.958111
251.007	2.14383	1.09147	1.45958	0.37108	1.10026	1.39711		251.476	0.555941	1.314	0.300264	0.0767232	2.53521	2.93938		251.5	4.93506	3.67389	0.852617	2.29643	2.00639	9.42101		251.5	1.84772	4.39043	5.84901	0.0448521	3.00966	0.88416
251.507	1.8554	1.05567	1.48716	0.365059	1.13266	1.3577		251.976	0.565092	1.33662	0.301356	0.0705174	2.71357	3.01533		252	4.95505	3.51506	0.898755	2.75068	1.89942	9.05815		252	2.11743	4.39316	5.84407	0.044278	3.41216	0.776992
252.007	1.61579	1.01778	1.51418	0.362306	1.15975	1.31787		252.476	0.576384	1.35702	0.300415	0.0680884	2.85144	3.08177		252.5	4.95763	3.44957	1.08604	3.0072	1.82825	8.5934		252.5	2.2942	3.9223	5.83914	0.0425579	3.64353	0.656201
252.507	1.47166	0.975086	1.53812	0.361197	1.18251	1.2781		252.976	0.589435	1.3756	0.297804	0.068762	2.95605	3.14039		253	4.85896	3.36444	1.39833	3.0814	1.75875	8.05127		253	2.29541	3.8432	5.83508	0.0419851	3.70127	0.588211
253.007	1.46965	0.924878	1.55652	0.360112	1.20192	1.23886		253.476	0.584406	1.38917	0.295927	0.0699259	2.99599	3.20241		253.5	4.86149	3.23141	1.51154	3.09695	1.63243	7.69012		253.5	2.29661	3.32185	5.83103	0.0414126	3.70135	0.539818
253.507	1.65639	0.864447	1.56689	0.357429	1.21895	1.20064		253.976	0.553272	1.39551	0.29511	0.0717977	2.94256	3.26935		254	4.85165	3.16124	1.50968	3.09765	1.43741	7.56364		254	1.98044	3.68315	5.85197	0.0521823	3.70143	0.495574
254.007	2.07854	0.791086	1.56673	0.351527	1.23458	1.16389		254.476	0.514675	1.40134	0.29663	0.0739071	2.85208	3.33038		254.5	4.85418	3.16057	1.50782	3.09836	1.25989	7.57594		254.5	1.52439	3.68553	5.8479	0.0834269	3.6736	0.470509
254.507	2.78274	0.702085	1.55357	0.340785	1.24979	1.12911		254.976	0.45357	1.40566	0.305195	0.0767334	2.64982	3.37362		255	4.79755	3.16241	1.34708	2.95971	1.18637	7.58827		255	1.25412	4.17894	5.84384	0.149144	3.5505	0.450473
255.007	4.76276	0.605735	1.52212	0.365224	1.25423	1.12033		255.476	0.39278	1.41052	0.313903	0.079694	2.4447	3.41605		255.5	4.64786	3.16425	1.11313	2.70083	1.16573	7.69653		255.5	1.21094	4.20838	5.7777	0.250629	3.407	0.41533
255.507	4.10122	0.590322	1.49662	0.331574	1.25168	1.0764		255.976	0.334551	1.41989	0.323777	0.0837536	2.21616	3.45187		256	3.93238	3.16608	0.958247	2.48894	1.15705	8.00506		256	1.21174	4.18419	5.55305	0.401421	3.34439	0.354254
256.007	3.52956	0.575494	1.4829	0.307764	1.25292	1.03721		256.476	0.276323	1.42925	0.333652	0.0878131	1.98762	3.48769		256.5	3.20388	3.18241	0.865309	2.30509	1.15182	8.43255		256.5	1.21255	4.18682	5.24985	0.586187	3.29616	0.316187
256.507	3.03972	0.560781	1.47788	0.29261	1.25776	1.00196		256.976	0.244505	1.438	0.339035	0.0920095	1.792	3.51195		257	2.94549	3.24265	0.750982	2.10334	1.14792	8.90217		257	1.30243	3.82272	4.87954	0.705827	3.13477	0.317954
257.007	2.62363	0.545714	1.47847	0.284932	1.266	0.969848		257.476	0.213526	1.44672	0.344275	0.0962103	1.59743	3.53584		257.5	2.61007	3.39591	0.6477	1.96486	1.14111	9.25802		257.5	1.32846	3.24631	4.48652	0.785636	2.8689	0.319723
257.507	2.27325	0.529824	1.48158	0.283545	1.27746	0.940064		257.976	0.208849	1.45085	0.344263	0.0976088	1.44207	3.55423		258	2.41673	3.58136	0.584174	1.89882	1.12055	9.48714		258	1.38889	3.0364	4.1035	0.884936	2.65401	0.32393
258.007	1.98051	0.512643	1.48412	0.287269	1.29193	0.911812		258.476	0.209598	1.45403	0.343168	0.0984292	1.29479	3.57149		258.5	2.41821	3.6693	0.547527	1.84969	1.06089	9.61932		258.5	1.72417	3.02894	3.88946	0.934739	2.54224	0.354697
258.507	1.73735	0.493702	1.48302	0.294921	1.30924	0.884288		258.976	0.204293	1.45778	0.342114	0.100794	1.17002	3.58004		259	2.31792	3.70451	0.490919	1.79047	0.99205	9.69862		259	1.82988	2.78202	3.77794	0.939988	2.45036	0.379847
259.007	1.53572	0.472531	1.47518	0.305319	1.32918	0.856692		259.476	0.195995	1.46182	0.34108	0.103922	1.05635	3.58429		259.5	2.05405	3.79218	0.422347	1.73764	0.990892	9.81311		259.5	1.8474	2.52532	3.7751	0.945231	2.40244	0.384688
259.507	1.36757	0.448661	1.45751	0.31728	1.35156	0.828222		259.976	0.234698	1.46931	0.33941	0.109492	0.951739	3.59409		260	2.05538	3.8506	0.378675	1.69829	0.989734	9.97045		260	2.00224	2.52711	3.77227	0.968661	2.31357	0.408037
260.007	2.33912	0.408257	1.38631	0.328333	1.35891	0.799215		260.476	0.315184	1.47987	0.337173	0.117234	0.855165	3.6088		260.5	2.0567	3.85274	0.34012	1.63971	1.02419	10.1366		260.5	2.00333	2.2096	3.78616	1.01211	2.12957	0.42845
260.507	1.1407	0.412691	1.38104	0.303978	1.36928	0.783369		260.976	0.394316	1.4914	0.334673	0.127734	0.764952	3.62304		261	2.46867	3.85488	0.308834	1.58797	1.1651	10.2308		261	1.94277	1.35851	4.00034	1.05406	2.01562	0.430367
261.007	0.621095	0.409664	1.36215	0.287666	1.38011	0.765734		261.476	0.471323	1.50448	0.33176	0.142564	0.684722	3.63654		261.5	3.54907	3.81917	0.296812	1.57147	1.30532	10.2997		261.5	1.78987	0.497023	4.1676	1.09834	1.98089	0.449767
261.507	0.635973	0.400959	1.33454	0.277887	1.39099	0.746793		261.976	0.54187	1.51377	0.3299	0.159255	0.608154	3.64979		262	4.05558	3.78714	0.295851	1.56275	1.39509	10.3587		262	1.80158	0.168454	4.26183	1.16443	1.86793	0.470585
262.007	1.041	0.388363	1.30308	0.273131	1.40149	0.727025		262.476	0.592976	1.5117	0.331207	0.181548	0.542608	3.66231		262.5	4.12129	3.77918	0.29489	1.5222	1.44475	10.375		262.5	1.8026	0.169046	4.34473	1.28746	1.67823	0.475023
262.507	1.69184	0.373659	1.27267	0.271891	1.4112	0.706912		262.976	0.634593	1.50963	0.333309	0.207802	0.478452	3.67138		263	4.24833	3.72537	0.29393	1.45918	1.59429	10.3481		263	1.72193	0.169638	4.44679	1.41623	1.57997	0.483036
263.007	2.44416	0.358632	1.24818	0.272656	1.4197	0.686935		263.476	0.598809	1.50767	0.341896	0.266372	0.425637	3.65237		263.5	4.5225	3.56492	0.371296	1.36933	2.07932	10.2157		263.5	1.72293	0.171596	4.55419	1.50418	1.52368	0.490244
263.507	3.15362	0.345067	1.2345	0.273918	1.42657	0.667576		263.976	0.563025	1.50571	0.350483	0.324941	0.372822	3.63335		264	5.55275	3.37436	0.566547	1.20199	2.7666	9.77782		264	1.72392	0.175468	4.70253	1.62702	1.39716	0.492244
264.007	3.6759	0.334748	1.23651	0.274167	1.43139	0.649315		264.476	0.50784	1.50328	0.359043	0.420069	0.329356	3.62602		264.5	6.43902	3.2513	0.754332	1.01901	3.29633	9.25717		264.5	1.72491	0.198201	4.83634	1.86267	1.2275	0.489291
264.507	3.86665	0.32946	1.25909	0.271894	1.43375	0.632633		264.976	0.452042	1.50084	0.367601	0.516351	0.286185	3.61906		265	6.50817	3.11512	0.871573	0.922392	3.61631	8.78662		265	1.70204	0.831847	4.83287	2.11152	1.04228	0.476402
265.007	3.29145	0.295036	1.32054	0.285972	1.50046	0.601385		265.476	0.404768	1.49474	0.379616	0.62776	0.25212	3.60427		265.5	6.51143	2.96062	0.995804	0.892459	3.95769	8.40155		265.5	1.70303	1.85518	4.82941	2.25468	0.920097	0.451052
265.507	2.83413	0.318604	1.32365	0.268444	1.47881	0.609036		265.976	0.359245	1.48789	0.392341	0.742275	0.219925	3.58788		266	6.51468	2.80705	1.15899	0.855865	4.44177	7.94535		266	1.70401	2.26612	4.79988	2.33536	0.869134	0.426738
266.007	2.43716	0.326425	1.32256	0.268937	1.47851	0.606701		266.476	0.31411	1.47609	0.405391	0.834611	0.194492	3.56479		266.5	5.85947	2.62517	1.27662	0.806644	4.78725	7.4228		266.5	1.75424	2.26778	4.7303	2.42969	0.804959	0.416196
266.507	2.09965	0.321734	1.31665	0.285197	1.494	0.596404		266.976	0.26915	1.46206	0.418587	0.916964	0.172103	3.5387		267	4.33145	2.47836	1.34856	0.741577	4.93493	6.8949		267	1.98492	2.26943	4.71517	2.62896	0.726403	0.403129
267.007	1.82073	0.30777	1.30527	0.314969	1.51969	0.580173		267.476	0.233011	1.44746	0.432058	0.984456	0.151734	3.49845		267.5	3.16493	2.35896	1.40897	0.652627	5.12797	6.42982		267.5	2.38164	2.17185	4.70777	2.89219	0.679614	0.393077
267.507	1.59949	0.287769	1.28779	0.355998	1.55004	0.560033		267.976	0.204113	1.43238	0.445755	1.03975	0.133024	3.44659		268	2.69547	2.2155	1.45667	0.597608	5.32862	6.1759		268	2.5693	2.17345	4.70439	3.06362	0.650882	0.394947
268.007	1.43506	0.264968	1.26359	0.406029	1.57945	0.538011		268.476	0.182231	1.42046	0.454347	1.08747	0.114688	3.4045		268.5	2.52205	2.03409	1.53569	0.5568	5.42895	5.91184		268.5	2.57548	2.17506	4.70015	3.13103	0.627166	0.396819
268.507	1.32654	0.242605	1.23201	0.462808	1.60237	0.516132		268.976	0.170456	1.41307	0.455584	1.12427	0.0968901	3.37649		269	2.46426	1.87384	1.58299	0.491187	5.50017	5.44757		269	2.57678	2.23762	4.69676	3.30849	0.58472	0.431857
269.007	1.27305	0.223917	1.19244	0.52408	1.61323	0.496422		269.476	0.162258	1.40537	0.454595	1.15443	0.0801767	3.35364		269.5	2.5251	1.76023	1.60268	0.44277	5.56843	5.0038		269.5	2.57809	2.68125	4.69339	3.65853	0.529899	0.557679
269.507	1.2737	0.21214	1.14423	0.58759	1.60646	0.480908		269.976	0.163744	1.39682	0.447583	1.16657	0.066399	3.34474		270	2.52663	1.65451	1.67476	0.416151	5.56461	4.72743		270	2.57939	2.96483	4.67803	3.89367	0.484608	0.8772
270.007	0.869471	0.205	1.00694	0.624034	1.43744	0.465113		270.476	0.164451	1.38909	0.439968	1.17636	0.0533536	3.33744		270.5	2.19521	1.55898	1.7676	0.390672	5.5608	4.43091		270.5	2.62763	3.27701	4.55839	3.93901	0.422425	1.29243
270.507	2.22899	0.191606	1.02541	0.67175	1.6051	0.450956		270.976	0.159937	1.38683	0.428307	1.17041	0.0452178	3.34082		271	1.86351	1.45908	1.83164	0.363576	5.53535	4.05217		271	2.73997	3.34383	4.4557	3.95039	0.360407	1.35322
271.007	3.0463	0.186631	1.02732	0.704961	1.70454	0.438608		271.476	0.155422	1.38457	0.416646	1.16446	0.0370821	3.34419		271.5	1.86475	1.36885	1.897	0.32797	5.4615	3.75467		271.5	2.87441	3.34603	4.35085	3.96553	0.334175	1.35638
271.507	3.42075	0.18743	1.01578	0.725186	1.7477	0.427778		271.976	0.155785	1.38799	0.408323	1.137	0.0330441	3.34787		272	2.02667	1.29723	1.95682	0.297636	5.40439	3.54091		272	2.87582	3.34823	4.19378	3.97556	0.310617	1.35955
272.007	3.45168	0.191356	0.993863	0.733949	1.74653	0.418174		272.476	0.156199	1.39146	0.400035	1.10932	0.0290501	3.35155		272.5	2.02798	1.23491	1.97283	0.288437	5.30494	3.3075		272.5	2.87724	2.75252	4.11138	3.97904	0.275854	1.02824
272.507	3.23844	0.195765	0.964664	0.732769	1.713	0.409506		272.976	0.150684	1.3972	0.395937	1.08003	0.0253273	3.34986		273	2.755	1.16998	1.99566	0.288659	5.12528	3.00891		273	2.68665	2.36462	4.08135	3.98731	0.250623	0.772089
273.007	2.88038	0.198011	0.931271	0.723168	1.65904	0.401482		273.476	0.14412	1.40333	0.39258	1.05047	0.0216525	3.34722		273.5	3.35324	1.10848	2.0548	0.288881	4.91673	2.76798		273.5	2.0868	2.30233	4.07834	4.05087	0.224387	0.722286
273.507	2.47684	0.195448	0.896774	0.706666	1.59661	0.393812		273.976	0.146137	1.41152	0.393245	1.0132	0.0201985	3.34436		274	3.38663	1.07703	2.09026	0.292552	4.71413	2.62968		274	1.72375	2.25185	4.07533	4.14307	0.196645	0.717819
274.007	2.12716	0.18543	0.86426	0.684785	1.53766	0.386204		274.476	0.151662	1.42054	0.395554	0.972787	0.0196524	3.34142		274.5	3.38853	1.02065	2.13722	0.284726	4.52707	2.4362		274.5	1.72474	1.7372	4.1194	4.19396	0.159536	0.711923
274.507	1.93069	0.165313	0.83682	0.659046	1.49415	0.378367		274.976	0.151651	1.42992	0.396812	0.935056	0.0242579	3.33247		275	3.39043	0.905034	2.22249	0.284947	4.43152	2.22125		275	1.72574	0.754641	4.17645	4.22314	0.126273	0.712805
275.007	1.7952	0.149747	0.826149	0.623403	1.41971	0.371495		275.476	0.147456	1.43959	0.397274	0.899354	0.0327561	3.31899		275.5	3.39233	0.813293	2.27187	0.284478	4.40426	2.09114		275.5	1.73409	0.276573	4.17338	4.27545	0.110235	0.715104
275.507	1.63554	0.142821	0.804909	0.617529	1.43922	0.36337		275.976	0.136987	1.4485	0.396991	0.864462	0.044412	3.30475		276	3.22553	0.788894	2.28144	0.272504	4.37314	1.96239		276	1.82491	0.27722	4.17031	4.37889	0.105237	0.717406
276.007	1.49567	0.135615	0.784824	0.609799	1.43245	0.355831		276.476	0.1182	1.45641	0.395718	0.830645	0.0602539	3.28952		276.5	3.19234	0.779491	2.30344	0.255462	4.25066	1.77205		276.5	1.99093	0.277867	4.10273	4.42364	0.101074	0.718574
276.507	1.37588	0.128508	0.766539	0.60129	1.4049	0.348895		276.976	0.0972332	1.46155	0.395729	0.796343	0.0747592	3.2701		277	3.19416	0.760152	2.3031	0.238415	4.11176	1.59123		277	2.17427	0.382865	3.74368	4.42067	0.0908896	0.72088
277.007	1.27646	0.121876	0.750701	0.593079	1.36206	0.342582		277.476	0.0709246	1.45989	0.398887	0.760855	0.0859887	3.24046		277.5	3.19598	0.745225	2.30065	0.238628	4.07801	1.48224		277.5	2.2737	0.473293	3.27314	4.41769	0.0691636	0.72319
277.507	1.1977	0.116098	0.737955	0.586243	1.30942	0.33691		277.976	0.0483364	1.45667	0.401435	0.725491	0.0963835	3.2081		278	3.33172	0.715111	2.27383	0.238842	4.04947	1.3703		278	2.29751	0.474039	3.10142	4.32492	0.0534585	0.738065
278.007	1.13988	0.11155	0.728946	0.581861	1.25249	0.331896		278.476	0.0468308	1.44462	0.400521	0.690834	0.102048	3.16041		278.5	3.3336	0.662268	2.2461	0.239055	3.73605	1.29498		278.5	2.29871	0.474786	3.09898	4.16064	0.0387565	0.802146
278.507	1.10331	0.10861	0.724321	0.581008	1.19675	0.32756		278.976	0.0460009	1.43242	0.399603	0.656334	0.1077	3.11258		279	3.82506	0.613678	2.19828	0.261382	3.25054	1.19961		279	2.27729	0.496057	3.09655	4.05536	0.0150212	0.865824
279.007	1.08826	0.107655	0.724725	0.584762	1.14771	0.323919		279.476	0.112073	1.40469	0.398159	0.637371	0.112239	3.0513		279.5	4.62025	0.578894	2.1779	0.39292	2.9106	1.06163		279.5	2.1771	0.604761	3.34082	4.037	0.0150385	0.881514
279.507	1.09503	0.109062	0.730804	0.594201	1.11087	0.320991		279.976	0.178144	1.37697	0.396715	0.618407	0.116778	2.99002		280	4.69466	0.569502	2.17554	0.622435	2.65743	0.992148		280	1.96756	0.518118	3.70653	3.96466	0.0150558	0.88404
280.007	1.05455	0.116605	0.752355	0.619368	1.08432	0.318773		280.476	0.239488	1.3322	0.399172	0.607706	0.124685	2.91521		280.5	4.69713	0.570194	2.16455	0.748088	2.54398	0.964931		280.5	1.78396	0.518887	3.89495	3.88725	0.0239391	0.886568
280.507	1.10641	0.109959	0.744621	0.615608	1.06716	0.315418		280.976	0.300126	1.28488	0.402213	0.598239	0.133095	2.83837		281	4.6996	0.570886	2.13863	0.777433	2.5226	0.947376		281	1.73226	0.901516	3.89205	3.81022	0.0418561	0.853989
281.007	1.15598	0.102365	0.747805	0.6171	1.0488	0.311911		281.476	0.354055	1.24049	0.412913	0.58715	0.146025	2.7508		281.5	4.16299	0.592322	2.12021	0.859584	2.50125	0.897383		281.5	1.73326	1.28453	3.88915	3.67522	0.0657961	0.836305
281.507	1.20243	0.0940789	0.75848	0.621994	1.02931	0.308326		281.976	0.405507	1.19718	0.426444	0.575463	0.160625	2.65927		282	3.76608	0.609194	2.0841	0.924238	2.40994	0.829472		282	1.73426	1.28569	3.86966	3.54199	0.162007	0.83877
282.007	1.24493	0.0853597	0.77322	0.628436	1.00877	0.304734		282.476	0.493431	1.1588	0.438785	0.563689	0.182414	2.57266		282.5	3.56618	0.625811	1.96748	0.974846	2.17528	0.784496		282.5	1.76139	1.26319	3.75636	3.38087	0.322127	0.841238
282.507	1.28267	0.0764641	0.788597	0.634574	0.987235	0.301209		282.976	0.606679	1.12383	0.450301	0.551853	0.209194	2.48947		283	3.45789	0.649186	1.86359	1.02501	1.92752	0.78706		283	1.70813	1.28801	3.66088	3.18172	0.409981	0.909101
283.007	1.31483	0.0676497	0.801186	0.638557	0.964782	0.297821		283.476	0.803583	1.08868	0.461501	0.540324	0.240019	2.4055		283.5	3.07922	0.65666	1.73218	1.0392	1.65874	0.789628		283.5	1.75748	1.3095	3.47095	3.01996	0.410005	0.962947
283.507	1.34056	0.0591737	0.807558	0.638531	0.941477	0.294645		283.976	1.10273	1.05331	0.472313	0.529168	0.275788	2.32059		284	2.70022	0.686278	1.57936	1.18354	1.47317	0.828838		284	1.75849	1.43695	3.17692	2.89775	0.424752	0.966452
284.007	1.35906	0.0512934	0.804288	0.632645	0.917387	0.291751		284.476	1.3508	1.02037	0.477912	0.51847	0.30765	2.24428		284.5	2.66135	0.852321	1.44023	1.33346	1.39067	0.935725		284.5	1.67899	1.54417	2.91182	2.78079	0.439499	0.969091
284.507	1.36949	0.0442663	0.787949	0.619046	0.89258	0.289212		284.976	1.48526	0.992863	0.47192	0.50879	0.330824	2.18711		285	2.62998	1.14821	1.29875	1.52614	1.28494	1.03216		285	1.41562	1.84181	2.77477	2.6339	0.439523	0.970862
285.007	1.35368	0.0384438	0.776422	0.628736	0.845472	0.279982		285.476	1.61972	0.965352	0.465927	0.49911	0.353999	2.12994		285.5	2.63155	1.3734	1.21636	1.76529	1.21521	1.09028		285.5	1.20051	2.14644	2.77253	2.39681	0.443898	0.91787
285.507	1.39495	0.0362746	0.772155	0.622465	0.854266	0.288618		285.976	1.74034	0.937367	0.458693	0.488688	0.376345	2.06944		286	2.6256	1.52455	1.17812	1.87475	1.16245	1.2254		286	1.20131	2.15474	2.77029	2.1438	0.487089	0.863858
286.007	1.42074	0.0356719	0.766224	0.619636	0.850807	0.293404		286.476	1.74895	0.905554	0.441412	0.472268	0.391988	1.98204		286.5	2.62717	1.70695	1.16007	1.96509	1.12178	1.55983		286.5	1.20211	2.15634	2.836	1.9754	0.577299	0.864023
286.507	1.43375	0.0363856	0.760007	0.620551	0.837791	0.295325		286.976	1.75756	0.873742	0.424132	0.455847	0.40763	1.89463		287	2.62874	1.94649	1.11683	2.00648	1.10699	1.97814		287	1.35334	2.15794	3.09585	1.90965	0.637895	0.866525
287.007	1.43666	0.0381656	0.754877	0.625513	0.817912	0.295365		287.476	1.56773	0.851615	0.400754	0.439335	0.414192	1.82393		287.5	2.5399	2.25611	1.06001	2.007	1.07126	2.38907		287.5	1.50467	2.10247	3.52435	1.90103	0.724764	0.86903
287.507	1.43218	0.0407617	0.752211	0.634823	0.793865	0.294507		287.976	1.3718	0.829787	0.377188	0.422821	0.420474	1.75375		288	2.43881	2.51005	0.973716	2.00752	1.02637	2.90965		288	1.50559	1.91035	4.00062	1.85283	0.908517	0.849252
288.007	1.42299	0.0439238	0.753384	0.648784	0.768344	0.293735		288.476	1.20677	0.803165	0.364555	0.409265	0.452015	1.69426		288.5	2.32951	2.7443	0.861696	2.00804	0.987661	3.63269		288.5	1.5065	1.65783	4.3522	1.85126	1.08742	0.908408
288.507	1.41179	0.0474017	0.759773	0.667697	0.744044	0.294033		288.976	1.04804	0.775564	0.354154	0.396313	0.488714	1.63695		289	2.2323	3.11745	0.76045	1.96695	0.931898	4.5024		289	1.28343	1.54178	4.53553	1.84969	1.15272	0.910969
289.007	1.40126	0.0509451	0.772752	0.691865	0.723659	0.296386		289.476	0.909337	0.749168	0.349421	0.383202	0.598633	1.57627		289.5	2.23369	3.49853	0.674103	1.93602	0.869825	5.38685		289.5	0.96056	1.54307	4.53225	1.86514	1.16966	0.893513
289.507	1.3941	0.0543041	0.793698	0.721589	0.709885	0.301776		289.976	0.779622	0.723312	0.347229	0.370019	0.741388	1.51408		290	2.20722	3.73271	0.573374	1.91086	0.817763	6.29975		290	0.8616	1.54436	4.52897	1.93378	1.20182	0.839152
290.007	1.3691	0.0473951	0.820258	0.752417	0.712945	0.297872		290.476	0.654221	0.700457	0.348805	0.35329	0.97945	1.45374		290.5	2.18071	3.9588	0.452083	1.89587	0.784865	7.36502		290.5	0.862278	1.59812	4.46474	1.96145	1.22629	0.78848
290.507	1.3036	0.0495941	0.821234	0.781684	0.678698	0.293402		290.976	0.532342	0.680051	0.353455	0.333665	1.2953	1.39491		291	2.18209	4.28466	0.377421	1.88156	0.742331	8.49125		291	0.862957	1.65362	4.25013	1.95983	1.33159	0.729687
291.007	1.23593	0.0494378	0.825073	0.80291	0.656614	0.290898		291.476	0.423882	0.661635	0.360893	0.315663	1.6539	1.3362		291.5	2.18347	4.55985	0.359396	1.86309	0.699337	9.46135		291.5	0.945052	1.69541	4.03965	1.94971	1.57043	0.724016
291.507	1.16842	0.0476542	0.830711	0.816741	0.643034	0.289881		291.976	0.3347	0.646079	0.372337	0.299992	2.0739	1.27765		292	2.22034	4.69335	0.338182	1.83605	0.670378	10.2783		292	1.27353	1.73865	3.79665	1.94809	1.71054	0.72633
292.007	1.10341	0.0449711	0.837082	0.823826	0.634302	0.289871		292.476	0.25777	0.628951	0.383633	0.285364	2.47563	1.22096		292.5	2.22173	4.747	0.292449	1.79835	0.648822	11.0285		292.5	1.52077	1.74313	3.57087	1.88563	1.71059	0.728647
292.507	1.04324	0.0421163	0.84312	0.824809	0.626761	0.290387		292.976	0.213862	0.607585	0.394531	0.273547	2.82808	1.16931		293	2.76643	4.78573	0.224314	1.76064	0.639228	11.7959		293	1.52169	1.78194	3.47882	1.82802	1.71064	0.730967
293.007	0.990246	0.0398176	0.847759	0.820337	0.616754	0.29095		293.476	0.174574	0.586441	0.404621	0.262368	3.15976	1.11821		293.5	3.72231	4.8087	0.163611	1.72107	0.636244	12.4608		293.5	1.52261	1.90184	3.40877	1.80514	1.70918	0.739838
293.507	0.946765	0.0388028	0.849936	0.811058	0.600624	0.29108		293.976	0.166043	0.566777	0.409332	0.255449	3.35315	1.07076		294	3.72435	4.81126	0.140541	1.67454	0.633009	12.825		294	1.52353	1.98441	3.33882	1.8036	1.6796	0.7982
294.007	0.915134	0.0397999	0.848583	0.797617	0.574715	0.290297		294.476	0.157511	0.547113	0.414042	0.248529	3.54654	1.0233		294.5	3.7264	4.81382	0.139696	1.64466	0.617101	13.0913		294.5	1.30504	2.28288	3.32766	1.80206	1.61287	0.942657
294.507	0.89769	0.0435365	0.842637	0.780661	0.53537	0.288121		294.976	0.160749	0.532168	0.417761	0.241649	3.62716	0.98318		295	3.53595	4.80862	0.138851	1.58212	0.58626	13.3347		295	0.97839	2.94078	3.16343	1.80052	1.50898	1.20702
295.007	0.532056	0.0425318	0.849645	0.785763	0.497104	0.294671		295.476	0.164101	0.517269	0.42147	0.23477	3.70669	0.943128		295.5	2.40168	4.79086	0.138006	1.46974	0.560266	13.4481		295.5	0.932808	3.70764	2.85832	1.79899	1.39789	1.63786
295.507	1.4342	0.0319038	0.840267	0.776222	0.496435	0.288551		295.976	0.140449	0.50218	0.44337	0.224783	3.75964	0.913275		296	1.90632	4.77118	0.137619	1.42035	0.54721	13.4689		296	0.918072	4.42223	2.5555	1.76347	1.30085	2.25411
296.007	2.13402	0.0275066	0.855513	0.787472	0.486567	0.28845		296.476	0.11129	0.487052	0.46898	0.214163	3.80718	0.885502		296.5	1.90757	4.76403	0.137232	1.41104	0.545551	13.4897		296.5	0.918771	4.87329	2.14002	1.62868	1.19394	3.06853
296.507	2.63941	0.0281265	0.88947	0.816482	0.469562	0.292955		296.976	0.0756203	0.472353	0.497361	0.206495	3.82495	0.858151		297	1.90883	4.74759	0.136389	1.39268	0.544652	13.3922		297	0.965825	5.14121	1.67616	1.47678	1.11397	4.03323
297.007	2.95828	0.0325498	0.936223	0.860223	0.44748	0.300655		297.476	0.0370387	0.457845	0.526981	0.200146	3.82941	0.830989		297.5	2.01883	4.7112	0.135546	1.37988	0.543754	13.2053		297.5	0.966542	5.43455	1.37348	1.39417	1.06429	5.16716
297.507	3.0985	0.0395627	0.98986	0.915664	0.422381	0.310135		297.976	-0.00112846	0.44391	0.558227	0.193634	3.82199	0.803709		298	2.16108	4.69376	0.134704	1.37611	0.544372	13.2257		298	0.967259	5.82941	1.22174	1.28936	1.02148	6.21256
298.007	3.06796	0.0479516	1.04447	0.979774	0.396325	0.319984		298.476	-0.0372839	0.432752	0.597363	0.186327	3.75698	0.775853		298.5	2.21043	4.69162	0.133408	1.37281	0.547259	13.2461		298.5	0.967976	6.23203	1.1358	1.1147	0.976823	7.22275
298.507	2.87457	0.0565025	1.09413	1.04952	0.371375	0.328789		298.976	-0.0723285	0.421661	0.636252	0.178905	3.69078	0.74788		299	2.31133	4.68661	0.117797	1.3658	0.554683	13.3044		299	0.796482	6.67948	0.984939	0.939933	0.961457	8.36099
299.007	2.52622	0.064002	1.13293	1.12188	0.349589	0.335136		299.476	-0.0721783	0.412689	0.667304	0.167845	3.58713	0.716171		299.5	2.42637	4.6664	0.102663	1.35786	0.563106	13.4132		299.5	0.616874	7.53658	0.770655	0.821777	0.96149	9.41637
299.507	2.03078	0.0692361	1.15496	1.19382	0.333029	0.337613		299.976	-0.0720281	0.403717	0.698356	0.156784	3.48348	0.684461		300	2.53975	4.63235	0.086643	1.33552	0.581847	13.4339		300	0.559519	8.58776	0.657336	0.587417	0.961523	10.6036
300.007	1.66858	0.0531452	1.18961	1.29174	0.321109	0.336725		300.476	-0.0682868	0.389239	0.732914	0.147082	3.34277	0.6593		300.5	2.65968	4.58963	0.070646	1.31968	0.638081	13.4547		300.5	0.496624	9.14735	0.638752	0.205999	0.97612	11.7915
300.507	1.404	0.0765393	1.20652	1.35202	0.302593	0.341547		300.976	-0.0641035	0.374085	0.767902	0.137548	3.1975	0.634944		301	2.69762	4.51975	0.0698522	1.32008	0.719917	13.3713		301	0.482173	9.35499	0.622664	0.00336043	0.994735	12.8251
301.007	1.19151	0.0924821	1.2175	1.40835	0.285177	0.344312		301.476	-0.0638812	0.362364	0.802183	0.131544	3.03727	0.606705		301.5	2.69922	4.4243	0.0647575	1.32048	0.759406	13.2684		301.5	0.462711	9.64398	0.575555	-0.0100296	0.999959	13.6716
301.507	1.02363	0.102407	1.22476	1.46189	0.268654	0.345436		301.976	-0.0649722	0.351783	0.83623	0.126711	2.87208	0.57718		302	2.76244	4.32699	0.0537876	1.4242	0.764164	13.2032		302	0.463244	10.0962	0.493364	-0.0105735	0.999993	14.0076
302.007	0.892886	0.107748	1.23047	1.51379	0.252818	0.345335		302.476	-0.0314278	0.344032	0.864224	0.125069	2.6702	0.561154		302.5	2.83922	4.22602	0.0401207	1.63362	0.780219	13.0446		302.5	0.463777	10.3654	0.404411	-0.0111171	1.00003	14.0278
302.507	0.791803	0.109938	1.23684	1.56522	0.237464	0.344423		302.976	0.026086	0.33824	0.888028	0.125636	2.44291	0.55447		303	2.8544	4.14335	0.0248922	1.65846	0.805042	12.8118		303	0.774194	10.3712	0.403578	0.0145666	0.990853	14.0479
303.007	0.712908	0.110412	1.24604	1.61734	0.222386	0.343117		303.476	0.0787477	0.335615	0.909626	0.126391	2.21064	0.557947		303.5	2.87075	4.10566	0.0175862	1.65938	0.830338	12.6649		303.5	1.42037	10.3769	0.402745	0.160247	0.935306	13.8731
303.507	0.648727	0.110602	1.26027	1.67131	0.207377	0.341831		303.976	0.125503	0.336844	0.928536	0.127374	1.97229	0.573793		304	2.87243	4.10791	0.0168317	1.65984	0.854349	12.5856		304	1.75892	10.1173	0.440802	0.381309	0.813626	13.4281
304.007	0.591787	0.111942	1.28172	1.72828	0.192232	0.340981		304.476	0.17191	0.34177	0.947416	0.126502	1.73735	0.601042		304.5	2.88881	4.11016	0.0160778	1.6603	0.866553	12.5137		304.5	1.75993	9.77257	0.521236	0.469338	0.72392	12.9739
304.507	0.534614	0.115865	1.31257	1.78943	0.176745	0.340983		304.976	0.217545	0.354887	0.966233	0.121518	1.50996	0.653555		305	2.8905	4.12163	0.0198291	1.66076	0.865468	12.4752		305	1.78149	9.73019	0.520334	0.468531	0.68561	12.7796
305.007	0.481607	0.111094	1.32975	1.85311	0.157903	0.337956		305.476	0.252065	0.37212	0.983325	0.116936	1.29221	0.708218		305.5	2.89218	4.19831	0.1208	1.69353	0.864383	12.3938		305.5	1.79053	9.73562	0.519432	0.467724	0.670905	12.6205
305.507	0.500829	0.105291	1.3289	1.88299	0.148047	0.339124		305.976	0.232701	0.409313	0.992059	0.1143	1.1212	0.773308		306	2.90859	4.28291	0.3181	2.1948	0.846538	12.1255		306	1.79154	9.74106	0.316078	0.399011	0.664571	12.3654
306.007	0.511985	0.104607	1.33554	1.9202	0.14184	0.339915		306.476	0.213995	0.44706	0.999662	0.111659	0.951632	0.838868		306.5	3.50298	4.28524	0.417126	2.80043	0.804709	11.7998		306.5	1.79256	10.6169	0.0758296	0.398243	0.636806	12.2811
306.507	0.518752	0.107784	1.3473	1.96299	0.138196	0.340365		306.976	0.216267	0.502485	0.971238	0.108853	0.828041	0.919408		307	5.79011	4.28757	0.435388	3.32393	0.751184	11.5638		307	1.79358	11.4679	0.0244336	0.397474	0.636834	12.2989
307.007	0.524801	0.113564	1.36182	2.0096	0.136031	0.340509		307.476	0.218539	0.557909	0.942813	0.106047	0.70445	0.999948		307.5	8.4395	4.2323	0.474939	3.9267	0.666254	11.1511		307.5	1.7946	11.5077	0.0101894	0.484614	0.636862	12.3167
307.507	0.533809	0.120688	1.37671	2.05826	0.134258	0.340383		307.976	0.240043	0.609283	0.888901	0.106874	0.607919	1.08394		308	8.54034	4.05481	0.506134	4.29608	0.571937	10.6042		308	1.70467	11.514	5.01924e-05	0.697367	0.648443	12.4736
308.007	0.54945	0.127897	1.38961	2.10722	0.131792	0.340021		308.476	0.263896	0.660163	0.831878	0.108144	0.514692	1.16836		308.5	8.54447	3.76682	0.586128	4.51666	0.533107	10.0231		308.5	1.41413	11.5203	-0.0100773	0.799043	0.723485	12.6308
308.507	0.575397	0.133932	1.39815	2.15472	0.12755	0.339461		308.976	0.334678	0.704956	0.776774	0.106586	0.44498	1.24594		309	8.5486	3.38805	0.758694	4.80156	0.532216	9.35864		309	1.20836	11.4595	-0.0106646	0.832043	0.909379	12.649
309.007	0.615326	0.137537	1.39995	2.199	0.120444	0.338735		309.476	0.421021	0.747731	0.722306	0.104091	0.383065	1.32126		309.5	6.69736	3.15032	0.888048	4.94619	0.530079	8.69083		309.5	1.20916	11.4658	-0.0406364	0.831037	1.3282	12.6674
309.507	0.67291	0.13745	1.39264	2.23829	0.109391	0.337882		309.976	0.503082	0.788833	0.669385	0.102331	0.326084	1.39564		310	5.25168	2.99718	0.941868	5.07154	0.49881	7.79432		310	1.22406	11.4838	-0.0412056	0.830031	1.8542	12.5389
310.007	0.75005	0.132632	1.39304	2.24882	0.102411	0.337474		310.476	0.576498	0.826557	0.619586	0.102058	0.279068	1.46813		310.5	4.53134	2.84142	0.990246	5.30265	0.423278	6.92414		310.5	1.22487	11.2986	-0.0417744	0.760378	2.09991	12.3536
310.507	0.810708	0.15233	1.40647	2.3036	0.106111	0.339285		310.976	0.640402	0.863821	0.571566	0.103062	0.233996	1.53928		311	4.08836	2.75215	1.05663	5.42997	0.345097	6.65741		311	1.53737	11.1805	-0.000245057	0.64213	2.09996	12.1975
311.007	0.836575	0.167781	1.41023	2.34664	0.108377	0.339906		311.476	0.664068	0.899138	0.531072	0.109472	0.197145	1.60476		311.5	3.93139	2.65312	1.06648	5.43108	0.290125	6.66841		311.5	2.35585	10.8049	0.328687	0.586429	2.10001	12.0431
311.507	0.836062	0.179301	1.40654	2.3798	0.109309	0.339651		311.976	0.683595	0.934018	0.490897	0.116072	0.160834	1.66985		312	3.93353	2.53048	1.06495	5.43219	0.243166	6.67943		312	3.02375	10.1782	0.633085	0.557344	1.93997	11.8611
312.007	0.817577	0.187207	1.39759	2.40495	0.109005	0.338838		312.476	0.626425	0.960803	0.456656	0.126184	0.134524	1.72768		312.5	3.93566	2.53204	1.06342	5.42281	0.197751	6.73653		312.5	3.04438	9.93309	0.784754	0.536583	1.68564	11.7331
312.507	0.789532	0.191819	1.3856	2.42396	0.107566	0.337781		312.976	0.569255	0.987587	0.422414	0.136297	0.108213	1.78551		313	3.9378	2.53359	0.884058	5.24609	0.16951	6.86079		313	3.18755	9.93863	0.890994	0.513602	1.68569	11.5545
313.007	0.760335	0.193452	1.37279	2.43869	0.105089	0.336797		313.476	0.51922	1.01155	0.399837	0.162249	0.0882778	1.84227		313.5	3.93994	2.54374	0.638682	4.80754	0.15643	7.34917		313.5	3.19211	9.88529	0.905849	0.477877	1.68573	11.149
313.507	0.738397	0.192424	1.36137	2.451	0.101675	0.3362		313.976	0.469879	1.03525	0.378394	0.18974	0.0689623	1.89892		314	3.29333	2.72106	0.500567	4.35438	0.140887	8.11946		314	3.19364	9.79511	0.949102	0.45242	1.70889	10.893
314.007	0.732127	0.189052	1.35353	2.46277	0.097423	0.336308		314.476	0.450392	1.05117	0.361642	0.223002	0.0587156	1.95093		314.5	2.87695	2.89035	0.434165	4.13121	0.12214	8.89731		314.5	3.19516	9.76378	1.13051	0.396712	2.10468	10.8324
314.507	0.749934	0.183655	1.35151	2.47585	0.092432	0.337436		314.976	0.439752	1.06478	0.34628	0.257973	0.0511563	2.00157		315	2.87862	2.96656	0.364531	4.04837	0.108614	9.53964		315	3.31487	9.64726	1.41119	0.319073	2.74668	10.7052
315.007	0.22611	0.184401	1.30261	2.43635	0.0664978	0.323649		315.476	0.438747	1.07462	0.338916	0.302481	0.0426059	2.04584		315.5	2.8803	3.19399	0.301208	3.8498	0.0973302	10.1143		315.5	4.16619	9.38961	1.61156	0.265443	3.34567	10.4484
315.507	1.74194	0.190251	1.35428	2.47566	0.0765668	0.335566		315.976	0.443367	1.08224	0.336221	0.352555	0.0334769	2.08638		316	3.11306	3.59212	0.274983	3.42485	0.0900156	10.793		316	5.11365	8.92868	1.84976	0.220134	3.63515	10.2039
316.007	2.64095	0.200078	1.38909	2.4949	0.0822358	0.343766		316.476	0.449895	1.09245	0.336562	0.396556	0.0265585	2.12862		316.5	3.23786	3.7871	0.265403	3.0497	0.0893818	11.3118		316.5	5.46775	8.48976	2.32891	0.183423	3.85498	9.96066
316.507	3.03923	0.212178	1.40969	2.49817	0.0847139	0.348762		316.976	0.458396	1.10533	0.340045	0.43427	0.0219283	2.17261		317	3.36277	3.78921	0.227736	2.85949	0.0887484	11.5997
317.007	3.05289	0.224844	1.41874	2.48959	0.0852097	0.351063		317.476	0.46486	1.12102	0.34587	0.470111	0.0178999	2.21804
317.507	2.79803	0.236371	1.41889	2.47326	0.0849323	0.351182		317.976	0.467563	1.14187	0.356017	0.502493	0.0149821	2.26614
318.007	2.39075	0.245055	1.41279	2.4533	0.0850906	0.34963		318.476	0.46871	1.16144	0.364292	0.531376	0.0138241	2.31567
318.507	1.94716	0.249191	1.40309	2.4338	0.0868933	0.346917		318.976	0.464054	1.17624	0.365576	0.547202	0.0192304	2.37058
319.007	1.58335	0.247072	1.39245	2.41889	0.0915495	0.343555		319.476	0.459421	1.19085	0.366347	0.561832	0.0236989	2.4241
319.507	1.41543	0.236994	1.38351	2.41266	0.100268	0.340054		319.976	0.455088	1.2029	0.360477	0.561009	0.0160428	2.45979
320.007	1.29959	0.209516	1.36016	2.42593	0.119448	0.33883		320.476	0.450755	1.21494	0.354607	0.560186	0.00838673	2.49547
320.507	1.18768	0.221808	1.37348	2.38202	0.109931	0.346008		320.976	0.455174	1.22163	0.354717	0.54141	0.0110996	2.53209
321.007	1.07879	0.226759	1.38453	2.34657	0.101713	0.350807		321.476	0.460235	1.22792	0.355266	0.521316	0.0145737	2.56877
321.507	0.974366	0.22668	1.39443	2.31879	0.0948449	0.353733		321.976	0.459659	1.24004	0.369905	0.497816	0.025613	2.59952
322.007	0.875875	0.223877	1.40431	2.29791	0.0893768	0.35529		322.476	0.453258	1.25819	0.399104	0.470798	0.0444697	2.62415
322.507	0.784772	0.220662	1.4153	2.28315	0.0853591	0.355983		322.976	0.450616	1.27721	0.435431	0.444052	0.0693503	2.65469
323.007	0.702512	0.219343	1.42851	2.27374	0.0828423	0.356316		323.476	0.454926	1.29785	0.484935	0.417812	0.105369	2.69619
323.507	0.630553	0.222229	1.44508	2.2689	0.0818767	0.356796		323.976	0.457572	1.31677	0.532081	0.392584	0.139538	2.73405
324.007	0.570351	0.231629	1.46612	2.26785	0.0825127	0.357926		324.476	0.453928	1.32917	0.570312	0.371181	0.166715	2.75817
324.507	0.523364	0.249852	1.49278	2.26981	0.0848008	0.360212		324.976	0.450569	1.34095	0.607054	0.349911	0.192903	2.78247
325.007	0.456033	0.276129	1.50356	2.31687	0.0880395	0.394024		325.476	0.450881	1.3447	0.624548	0.330368	0.206309	2.809
325.507	0.429525	0.248136	1.51114	2.26504	0.0876162	0.357572		325.976	0.451193	1.34845	0.642042	0.310825	0.219715	2.83553
326.007	0.403613	0.230316	1.51691	2.22453	0.0881245	0.330027		326.476	0.450922	1.35283	0.649009	0.300307	0.225751	2.85641
326.507	0.378625	0.220512	1.52143	2.19314	0.0897169	0.310317		326.976	0.450608	1.35725	0.655205	0.290451	0.231247	2.87688
327.007	0.354889	0.21657	1.52527	2.16862	0.0925453	0.297372		327.476	0.452145	1.36341	0.662614	0.290093	0.230819	2.90314
327.507	0.332733	0.216334	1.52901	2.14875	0.0967622	0.290121		327.976	0.454169	1.37004	0.67034	0.29223	0.228836	2.93092
328.007	0.312486	0.217648	1.53323	2.1313	0.10252	0.287494		328.476	0.458838	1.3769	0.676334	0.290878	0.222901	2.95923
328.507	0.294475	0.218357	1.5385	2.11404	0.10997	0.288419		328.976	0.464919	1.38389	0.681401	0.287661	0.214855	2.98783
329.007	0.279029	0.216305	1.54539	2.09475	0.119265	0.291826		329.476	0.471549	1.38953	0.686353	0.283351	0.209152	3.0111
329.507	0.266476	0.209337	1.55448	2.07118	0.130557	0.296645		329.976	0.478703	1.39388	0.691196	0.277998	0.205683	3.02931
330.007	0.25584	0.183916	1.55072	2.02977	0.155472	0.292442		330.476	0.482887	1.40215	0.69851	0.271006	0.204202	3.04104
330.507	0.249446	0.190792	1.55615	2.02018	0.163408	0.291277		330.976	0.481607	1.41762	0.710374	0.260995	0.206379	3.04085
331.007	0.243836	0.190573	1.56241	2.00997	0.167634	0.29071		331.476	0.480753	1.43246	0.722345	0.251695	0.210198	3.04415
331.507	0.238171	0.185724	1.5686	1.99882	0.169251	0.290568		331.976	0.481484	1.44498	0.73472	0.245036	0.22012	3.06044
332.007	0.231612	0.178709	1.57387	1.98643	0.169358	0.290677		332.476	0.481574	1.45668	0.746574	0.238348	0.230499	3.0761
332.507	0.22332	0.171992	1.57733	1.97246	0.169056	0.290864		332.976	0.473424	1.45791	0.751733	0.231279	0.246761	3.08364
333.007	0.212455	0.168038	1.57812	1.95662	0.169445	0.290955		333.476	0.465274	1.45914	0.756891	0.22421	0.263024	3.09118
333.507	0.19818	0.16931	1.57536	1.93857	0.171626	0.290778		333.976	0.459789	1.46111	0.758015	0.216876	0.290374	3.10202
334.007	0.179654	0.178274	1.56817	1.918	0.176698	0.29016		334.476	0.455728	1.46348	0.756987	0.2094	0.323641	3.11464
334.507	0.156039	0.197394	1.55569	1.89459	0.185762	0.288926		334.976	0.452217	1.46452	0.760124	0.201666	0.35824	3.11985
335.007	0.0983815	0.224118	1.53004	1.91582	0.166439	0.269277		335.476	0.449229	1.46428	0.767228	0.193685	0.394106	3.11801
335.507	0.126178	0.238417	1.5233	1.862	0.194786	0.289084		335.976	0.448951	1.46442	0.775753	0.185116	0.436121	3.10912
336.007	0.137207	0.234196	1.50693	1.82093	0.214629	0.291976		336.476	0.453245	1.46521	0.786676	0.175554	0.488507	3.08833
336.507	0.134209	0.222722	1.48147	1.789	0.228754	0.286039		336.976	0.465148	1.46201	0.797138	0.165657	0.541318	3.06414
337.007	0.119925	0.215261	1.44743	1.76255	0.239946	0.279363		337.476	0.505296	1.44402	0.805892	0.15451	0.595705	3.02735
337.507	0.0970986	0.223081	1.40534	1.73794	0.250989	0.280036		337.976	0.54421	1.42594	0.814222	0.143453	0.65015	2.98779
338.007	0.0684696	0.25745	1.35572	1.71152	0.26467	0.296146		338.476	0.567311	1.40671	0.817126	0.133529	0.705329	2.91271
338.507	0.03678	0.329633	1.2991	1.67966	0.283775	0.335781		338.976	0.590413	1.38748	0.82003	0.123606	0.760509	2.83763
339.007	0.00477114	0.450898	1.23599	1.63871	0.311087	0.407031		339.476	0.627596	1.36263	0.821152	0.118153	0.7815	2.76989
339.507	-0.0248154	0.632513	1.16692	1.58503	0.349393	0.517983		339.976	0.6658	1.33738	0.822145	0.113025	0.800012	2.70269
340.007	-0.0465649	0.867899	1.08117	1.50624	0.419443	0.663645		340.476	0.665944	1.3019	0.834865	0.115472	0.787298	2.62425
340.507	-0.0374501	1.07087	1.00108	1.45523	0.378808	0.858804		340.976	0.656093	1.26375	0.850666	0.119907	0.766382	2.54287
341.007	-0.0306639	1.25805	0.929292	1.4064	0.35368	1.07512		341.476	0.667787	1.22331	0.859007	0.127135	0.721981	2.46306
341.507	-0.025282	1.42747	0.864368	1.35915	0.339558	1.30419		341.976	0.690959	1.18165	0.863373	0.135849	0.665067	2.3841
342.007	-0.0203802	1.57716	0.804894	1.31288	0.331939	1.53765		342.476	0.708062	1.1416	0.869799	0.142843	0.605599	2.30347
342.507	-0.0150342	1.70516	0.749449	1.26701	0.326321	1.7671		342.976	0.71891	1.10321	0.878351	0.148063	0.543496	2.22114
343.007	-0.00831994	1.80949	0.696613	1.22092	0.318202	1.98416		343.476	0.736839	1.06825	0.882291	0.154202	0.484055	2.14214
343.507	0.000686898	1.88818	0.644965	1.17403	0.30308	2.18044		343.976	0.767784	1.0396	0.877756	0.162027	0.429504	2.06925
344.007	0.0129105	1.93928	0.593086	1.12572	0.276453	2.34756		344.476	0.804965	1.01109	0.875571	0.170818	0.378744	1.99643
344.507	0.0292751	1.9608	0.539555	1.07542	0.233819	2.47713		344.976	0.865269	0.983149	0.882097	0.183191	0.342044	1.92385
345.007	0.0457883	2.03666	0.508376	1.03009	0.201503	2.54405		345.476	0.92539	0.955184	0.888001	0.195643	0.30574	1.85217
345.507	0.0423635	2.09502	0.475866	1.00408	0.212537	2.63682		345.976	0.982207	0.926858	0.882645	0.209527	0.276582	1.79691
346.007	0.042441	2.11828	0.444176	0.978474	0.218086	2.71119		346.476	1.03903	0.898533	0.87729	0.223411	0.247425	1.74164
346.507	0.0453869	2.11553	0.413684	0.952916	0.218986	2.76886		346.976	1.06314	0.877383	0.883828	0.224889	0.235755	1.72298
347.007	0.0505673	2.09582	0.384763	0.92706	0.216075	2.81154		347.476	1.08414	0.856919	0.891502	0.225182	0.225755	1.70783
347.507	0.0573483	2.06825	0.357788	0.900557	0.210188	2.84094		347.976	1.05186	0.855092	0.903241	0.216935	0.260073	1.73231
348.007	0.0650959	2.04188	0.333136	0.873061	0.202164	2.85877		348.476	1.00392	0.858743	0.916176	0.206179	0.307421	1.76844
348.507	0.0731763	2.02578	0.31118	0.844223	0.192837	2.86673		348.976	0.940825	0.875057	0.935685	0.193808	0.405367	1.82125
349.007	0.0809555	2.02904	0.292295	0.813694	0.183045	2.86654		349.476	0.868913	0.89873	0.959016	0.1805	0.532724	1.88375
349.507	0.0877997	2.06072	0.276858	0.781127	0.173625	2.85989		349.976	0.805923	0.926865	0.975246	0.166942	0.712028	1.94432
350.007	0.0810193	2.1339	0.259505	0.772109	0.173249	2.85069		350.476	0.752123	0.959595	0.984162	0.153125	0.94484	2.00291
350.507	0.081312	2.16427	0.242035	0.753426	0.186552	2.84848		350.976	0.715608	0.987531	0.985108	0.139165	1.17768	2.05478
351.007	0.0864217	2.16475	0.226822	0.732928	0.190021	2.84848		351.476	0.710802	1.00667	0.971434	0.124939	1.41056	2.09433
351.507	0.0952384	2.1435	0.213465	0.711316	0.186128	2.8496		351.976	0.706306	1.02551	0.953715	0.111838	1.64151	2.1316
352.007	0.106652	2.10865	0.201561	0.689287	0.177346	2.85076		352.476	0.702957	1.0432	0.921012	0.102903	1.86531	2.16044
352.507	0.119552	2.06834	0.19071	0.66754	0.166148	2.85087		352.976	0.700222	1.06121	0.887515	0.094203	2.0812	2.1893
353.007	0.132828	2.03072	0.18051	0.646775	0.155009	2.84886		353.476	0.705311	1.08322	0.843914	0.0885013	2.19628	2.21856
353.507	0.145371	2.00394	0.17056	0.627691	0.1464	2.84364		353.976	0.710401	1.10524	0.800313	0.0827995	2.31136	2.24781
354.007	0.156069	1.99613	0.160457	0.610986	0.142796	2.83413		354.476	0.674419	1.11815	0.760394	0.0774452	2.39711	2.28312
354.507	0.163814	2.01545	0.149801	0.597361	0.146669	2.81924		354.976	0.63547	1.1304	0.720742	0.072116	2.48073	2.31887
355.007	0.179893	2.09286	0.136105	0.59958	0.139629	2.81525		355.476	0.621701	1.14005	0.679669	0.0686735	2.51885	2.34478
355.507	0.170455	1.97612	0.12502	0.583927	0.173313	2.77448		355.976	0.614505	1.14902	0.638226	0.0657235	2.54508	2.36813
356.007	0.168693	1.91025	0.116071	0.571716	0.195534	2.75126		356.476	0.617113	1.15542	0.605493	0.0648039	2.54002	2.3855
356.507	0.172727	1.88398	0.109069	0.562352	0.208248	2.74148		356.976	0.624932	1.16045	0.577389	0.0649633	2.51833	2.39971
357.007	0.180675	1.88599	0.103824	0.55524	0.213408	2.741		357.476	0.631796	1.1656	0.548914	0.0652135	2.4938	2.41398
357.507	0.190655	1.90501	0.100147	0.549785	0.212967	2.74569		357.976	0.610499	1.17408	0.509505	0.0681388	2.38559	2.43013
358.007	0.200786	1.92973	0.0978491	0.545392	0.208881	2.75143		358.476	0.589203	1.18256	0.470096	0.0710642	2.27739	2.44628
358.507	0.209187	1.94888	0.0967403	0.541465	0.203102	2.75409		358.976	0.561242	1.19001	0.442373	0.0721956	2.1106	2.46435
359.007	0.213975	1.95115	0.0966315	0.537411	0.197585	2.74955		359.476	0.532482	1.19733	0.41605	0.0731121	1.93679	2.48265
359.507	0.21327	1.92525	0.0973332	0.532633	0.194284	2.73367		359.976	0.48631	1.20502	0.394079	0.0750826	1.7503	2.50054
360.007	0.185253	1.94176	0.102312	0.520758	0.188945	2.6883		360.476	0.434427	1.21283	0.373536	0.0773989	1.55966	2.5183
360.507	0.230427	1.90667	0.0934832	0.506668	0.205227	2.67229		360.976	0.425024	1.21901	0.355891	0.0803172	1.38832	2.53223
361.007	0.261799	1.87206	0.0865009	0.492865	0.221585	2.65896		361.476	0.444777	1.22406	0.340234	0.0836488	1.23024	2.54354
361.507	0.283862	1.84028	0.0812062	0.479814	0.237674	2.64722		361.976	0.458919	1.22567	0.324223	0.0839452	1.10196	2.55171
362.007	0.301107	1.81364	0.0774402	0.467975	0.253151	2.63599		362.476	0.466285	1.22312	0.307783	0.0805764	1.00966	2.5561
362.507	0.318028	1.79447	0.075044	0.457811	0.267671	2.62417		362.976	0.46975	1.22004	0.29207	0.0765814	0.94399	2.5527
363.007	0.339116	1.78511	0.0738586	0.449785	0.28089	2.61067		363.476	0.464668	1.21583	0.277951	0.0712146	0.936647	2.53224
363.507	0.368864	1.78788	0.0737252	0.444358	0.292464	2.59441		363.976	0.452393	1.21377	0.26506	0.0656072	0.951986	2.51348
364.007	0.411763	1.8051	0.0744848	0.441992	0.302049	2.57429		364.476	0.405824	1.22198	0.258026	0.0588526	1.07545	2.50284
364.507	0.472306	1.83912	0.0759785	0.44315	0.309302	2.54922		364.976	0.359406	1.23007	0.251043	0.052119	1.20441	2.49231
365.007	0.585	1.88899	0.0806593	0.440632	0.320851	2.53493		365.476	0.317371	1.23459	0.245569	0.0459952	1.49245	2.48506
365.507	0.640626	1.85714	0.0758251	0.424699	0.321663	2.51564		365.976	0.275335	1.2391	0.240095	0.0398714	1.7805	2.47782
366.007	0.655521	1.83381	0.0725623	0.413182	0.323583	2.49398		366.476	0.248607	1.23885	0.236751	0.0354556	2.14809	2.47809
366.507	0.639711	1.81738	0.0706709	0.405359	0.326513	2.47196		366.976	0.223706	1.23804	0.233661	0.0312436	2.52517	2.47927
367.007	0.603223	1.80619	0.0699509	0.400506	0.330356	2.4516		367.476	0.233104	1.24209	0.233807	0.0293664	2.83907	2.48086
367.507	0.556085	1.79861	0.0702025	0.397901	0.335012	2.43494		367.976	0.253742	1.24773	0.235012	0.0282543	3.13226	2.48259
368.007	0.508323	1.79301	0.0712258	0.39682	0.340383	2.42398		368.476	0.291586	1.26016	0.240458	0.0258599	3.3125	2.48444
368.507	0.469963	1.78772	0.072821	0.396539	0.346372	2.42076		368.976	0.340274	1.27686	0.248578	0.0226575	3.42153	2.48637
369.007	0.451034	1.78113	0.074788	0.396337	0.352879	2.42729		369.476	0.387774	1.29352	0.256761	0.0190595	3.51325	2.48938
369.507	0.461561	1.77158	0.0769269	0.395489	0.359807	2.44559		369.976	0.429607	1.30994	0.265243	0.0135757	3.52242	2.49756
370.007	0.532532	1.7106	0.0792247	0.378794	0.340259	2.46054		370.476	0.469888	1.32605	0.273431	0.00822315	3.53068	2.50525
370.507	0.50154	1.73902	0.100316	0.391945	0.381191	2.44897		370.976	0.464996	1.33295	0.273091	0.00669374	3.51216	2.49862
371.007	0.491203	1.75293	0.11241	0.397883	0.413392	2.43925		371.476	0.460103	1.33986	0.272751	0.00516433	3.49364	2.49199
371.507	0.49706	1.75649	0.117385	0.398024	0.437657	2.43131		371.976	0.41781	1.34631	0.263809	0.0084641	3.43087	2.48115
372.007	0.514649	1.75387	0.11712	0.393784	0.45478	2.42505		372.476	0.371073	1.35271	0.253844	0.0123377	3.36283	2.46981
372.507	0.539509	1.74924	0.113494	0.386579	0.465557	2.42038		372.976	0.339718	1.36856	0.246687	0.0134556	3.30413	2.46531
373.007	0.56718	1.74676	0.108386	0.377825	0.470783	2.41722		373.476	0.313954	1.38786	0.240549	0.0135719	3.24882	2.46331
373.507	0.5932	1.75059	0.103674	0.368939	0.471252	2.41549		373.976	0.30029	1.40542	0.234794	0.0106869	3.21291	2.4686
374.007	0.613108	1.76489	0.101238	0.361337	0.467759	2.41509		374.476	0.294902	1.42178	0.229299	0.00574866	3.19025	2.47887
374.507	0.622443	1.79384	0.102955	0.356435	0.4611	2.41593		374.976	0.298702	1.43495	0.225482	0.00170502	3.17479	2.48543
375.007	0.638511	1.85225	0.0941463	0.355092	0.482958	2.42592		375.476	0.313571	1.44427	0.223687	-0.00126103	3.16799	2.48753
375.507	0.562021	1.82561	0.0907608	0.358554	0.472432	2.39052		375.976	0.334828	1.4527	0.22186	-0.00364739	3.14238	2.48598
376.007	0.513496	1.81605	0.088192	0.358088	0.462983	2.36553		376.476	0.370053	1.4592	0.219964	-0.00476609	3.07564	2.47646
376.507	0.487605	1.81879	0.0860006	0.354632	0.454648	2.34893		376.976	0.404937	1.4667	0.219474	-0.00575301	2.99468	2.46815
377.007	0.479015	1.82909	0.0837474	0.349126	0.447461	2.33873		377.476	0.438198	1.47894	0.225667	-0.00611342	2.84615	2.46561
377.507	0.482394	1.84216	0.0809932	0.342506	0.441458	2.33293		377.976	0.470421	1.49087	0.231812	-0.00641452	2.69562	2.46331
378.007	0.49241	1.85324	0.0772986	0.335712	0.436675	2.32953		378.476	0.472794	1.49364	0.236566	-0.00500986	2.48731	2.46815
378.507	0.503732	1.85757	0.0722244	0.329681	0.433147	2.32652		378.976	0.475167	1.49642	0.241319	-0.00360519	2.27899	2.47299
379.007	0.511026	1.85037	0.0653313	0.325353	0.430909	2.32191		379.476	0.44679	1.49431	0.238661	-0.00126564	2.04655	2.47534
379.507	0.508961	1.82689	0.0561801	0.323664	0.429997	2.31369		379.976	0.414766	1.49163	0.235124	0.00118476	1.81124	2.4774
380.007	0.484084	1.80993	0.0509317	0.327285	0.437515	2.30795		380.476	0.389752	1.48366	0.233547	0.0011111	1.60144	2.46028
380.507	0.43291	1.76804	0.0446913	0.313348	0.420837	2.26882		380.976	0.367029	1.47395	0.232612	0.000212164	1.39997	2.4369
381.007	0.390382	1.74814	0.0397697	0.305263	0.410558	2.24184		381.476	0.350276	1.46607	0.235186	-3.45383e-05	1.20654	2.41063
381.507	0.357337	1.74375	0.036007	0.301499	0.405691	2.22533		381.976	0.345452	1.46187	0.244773	0.00102166	1.02915	2.37859
382.007	0.334615	1.7484	0.0332435	0.300528	0.40525	2.21761		382.476	0.341134	1.45664	0.257095	0.00194127	0.862984	2.34694
382.507	0.323051	1.75559	0.0313194	0.30082	0.40825	2.217		382.976	0.33892	1.44716	0.280778	0.00229337	0.743443	2.31696
383.007	0.323485	1.75885	0.030075	0.300846	0.413705	2.22181		383.476	0.337862	1.43708	0.304053	0.0028042	0.625455	2.28713
383.507	0.336752	1.7517	0.0293504	0.299077	0.420629	2.23037		383.976	0.357137	1.4165	0.320155	0.00610644	0.534773	2.25993
384.007	0.363692	1.72766	0.0289858	0.293984	0.428036	2.24099		384.476	0.376411	1.39593	0.336257	0.00940868	0.444091	2.23273
384.507	0.405141	1.68024	0.0288215	0.284037	0.434939	2.252		384.976	0.395458	1.37018	0.350524	0.00688302	0.377882	2.20364
385.007	0.383816	1.58857	0.0401702	0.25553	0.407513	2.23542		385.476	0.414483	1.34394	0.364617	0.00380621	0.313987	2.17436
385.507	0.439073	1.57707	0.0587225	0.257251	0.446298	2.19496		385.976	0.430374	1.3249	0.375032	0.00353411	0.259806	2.15334
386.007	0.489991	1.57352	0.0693095	0.261346	0.475066	2.16485		386.476	0.44535	1.30797	0.384373	0.00408095	0.208462	2.13473
386.507	0.53649	1.57546	0.0735054	0.266879	0.495681	2.14364		386.976	0.433893	1.29896	0.389636	0.00597411	0.168095	2.12464
387.007	0.578486	1.58047	0.0728846	0.27291	0.510007	2.12988		387.476	0.407163	1.29453	0.392541	0.00864513	0.134072	2.11949
387.507	0.615899	1.58612	0.0690212	0.278501	0.519907	2.12212		387.976	0.38057	1.29368	0.387667	0.0115117	0.103138	2.12128
388.007	0.648647	1.58995	0.0634897	0.282715	0.527246	2.11892		388.476	0.354116	1.29651	0.374829	0.0145784	0.0753673	2.13019
388.507	0.676648	1.58955	0.0578642	0.284613	0.533887	2.11881		388.976	0.332546	1.29664	0.35884	0.0182519	0.0516434	2.13313
389.007	0.69982	1.58248	0.0537192	0.283258	0.541694	2.12037		389.476	0.319881	1.29186	0.337103	0.023032	0.0352985	2.1252
389.507	0.718082	1.56629	0.0526288	0.27771	0.552531	2.12213		389.976	0.311878	1.28932	0.316189	0.0286509	0.0217504	2.11731
390.007	0.684521	1.56632	0.0397915	0.273973	0.573264	2.14196		390.476	0.32096	1.29496	0.298295	0.0373436	0.01845	2.10957
390.507	0.753626	1.56591	0.0551903	0.27711	0.582324	2.12778		390.976	0.329708	1.30116	0.281003	0.0461659	0.0172159	2.10156
391.007	0.810357	1.56689	0.065425	0.283468	0.590903	2.11772		391.476	0.334296	1.31421	0.271221	0.056606	0.0417624	2.09027
391.507	0.854238	1.56951	0.0712818	0.291988	0.597717	2.11098		391.976	0.338883	1.32725	0.26144	0.0670462	0.066309	2.07897
392.007	0.884791	1.57399	0.073547	0.301613	0.60148	2.10676		392.476	0.344792	1.3371	0.254268	0.0694885	0.083735	2.07471
392.507	0.90154	1.58058	0.073007	0.311284	0.600907	2.10425		392.976	0.350793	1.34673	0.247279	0.0713694	0.100661	2.07095
393.007	0.904009	1.5895	0.070448	0.319942	0.594714	2.10266		393.476	0.361188	1.35298	0.242648	0.0714411	0.118041	2.06118
393.507	0.891723	1.60099	0.0666563	0.326529	0.581616	2.10118		393.976	0.376856	1.35517	0.240848	0.0693405	0.135966	2.04423
394.007	0.864204	1.61528	0.0624183	0.329988	0.560328	2.09901		394.476	0.399797	1.35597	0.239506	0.067734	0.14584	2.02886
394.507	0.820975	1.63261	0.0585202	0.329258	0.529564	2.09534		394.976	0.438612	1.35373	0.239164	0.0672061	0.138143	2.01696
395.007	0.848023	1.64441	0.0600167	0.322267	0.476931	2.05361		395.476	0.474773	1.35254	0.240441	0.0666931	0.131946	2.00609
395.507	0.803697	1.61806	0.0644564	0.319482	0.480726	2.06411		395.976	0.498392	1.35634	0.249373	0.06625	0.132842	2.00007
396.007	0.784283	1.59291	0.0662929	0.322102	0.484142	2.06476		396.476	0.521513	1.35968	0.258629	0.0659553	0.133609	1.99409
396.507	0.78378	1.57058	0.0660231	0.328172	0.486791	2.05839		396.976	0.530761	1.35017	0.276918	0.0698023	0.13077	1.98959
397.007	0.79619	1.55267	0.064144	0.335739	0.488283	2.04785		397.476	0.540008	1.34066	0.295208	0.0736492	0.12793	1.98509
397.507	0.815513	1.54082	0.0611525	0.342851	0.488229	2.03596		397.976	0.542667	1.3195	0.312452	0.0724944	0.131235	1.95226
398.007	0.835748	1.53664	0.0575458	0.347555	0.486241	2.02557		398.476	0.544549	1.29696	0.329574	0.0707504	0.135265	1.9161
398.507	0.850896	1.54174	0.0538206	0.347896	0.48193	2.0195		398.976	0.546098	1.26598	0.346311	0.0672405	0.140325	1.86188
399.007	0.854958	1.55774	0.050474	0.341924	0.474907	2.0206		399.476	0.547539	1.23225	0.362923	0.0631565	0.14572	1.80177
399.507	0.841933	1.58627	0.048003	0.327683	0.464783	2.0317		399.976	0.554898	1.2	0.376582	0.059051	0.152554	1.73677
400.007	0.386552	1.62542	0.0494937	0.334697	0.482791	2.03087		400.476	0.565967	1.16867	0.38839	0.054932	0.16029	1.66869
400.507	1.06179	1.57813	0.0529324	0.335022	0.489545	2.02382		400.976	0.582277	1.13225	0.401853	0.0529749	0.166305	1.60471
401.007	1.60201	1.54761	0.0682466	0.337888	0.493299	2.01757		401.476	0.604389	1.0902	0.417147	0.0534109	0.170416	1.54525
401.507	2.00746	1.53046	0.0917783	0.34235	0.49492	2.01226		401.976	0.634494	1.04871	0.4319	0.0565034	0.172691	1.48444
402.007	2.27844	1.52327	0.11987	0.347461	0.495275	2.00805		402.476	0.68048	1.00832	0.445578	0.0648738	0.171317	1.42094
402.507	2.41522	1.52262	0.148863	0.352274	0.495234	2.00507		402.976	0.720668	0.969037	0.459018	0.0723481	0.171404	1.359
403.007	2.41806	1.5251	0.1751	0.355845	0.495663	2.00347		403.476	0.736895	0.93427	0.471473	0.0761185	0.177524	1.30358
403.507	2.28725	1.52729	0.194924	0.357226	0.497432	2.0034		403.976	0.751231	0.900222	0.484283	0.0800309	0.184223	1.24879
404.007	2.02306	1.52578	0.204675	0.355472	0.501407	2.00501		404.476	0.733066	0.878532	0.503205	0.0863807	0.200869	1.20502
404.507	1.62577	1.51715	0.200697	0.349636	0.508456	2.00842		404.976	0.714902	0.856841	0.522126	0.0927305	0.217514	1.16126
405.007	1.02194	1.44913	0.185947	0.31601	0.545135	2.06572		405.476	0.683108	0.832148	0.538576	0.0971176	0.241479	1.11667
405.507	1.14931	1.49776	0.177854	0.331261	0.540589	2.01254		405.976	0.644135	0.805873	0.553723	0.100471	0.2693	1.07166
406.007	1.12731	1.52412	0.167806	0.340401	0.539232	1.97849		406.476	0.624124	0.779654	0.568557	0.10138	0.304474	1.02351
406.507	1.00748	1.53291	0.15868	0.347753	0.539416	1.95959		406.976	0.621985	0.753488	0.583095	0.0999854	0.346578	0.97241
407.007	0.84134	1.52884	0.15335	0.357641	0.53949	1.95184		407.476	0.619879	0.72945	0.593483	0.096053	0.392606	0.924578
407.507	0.680422	1.51662	0.154691	0.374388	0.537805	1.95128		407.976	0.617831	0.708959	0.596953	0.0878906	0.445175	0.882194
408.007	0.576248	1.50094	0.165578	0.402318	0.532712	1.95389		408.476	0.619366	0.688272	0.601444	0.079998	0.496796	0.842738
408.507	0.580345	1.48652	0.188887	0.445754	0.522561	1.95571		408.976	0.632569	0.666947	0.609257	0.072983	0.545331	0.812814
409.007	0.74424	1.47806	0.227493	0.509018	0.505702	1.95273		409.476	0.646792	0.645464	0.616414	0.0661873	0.594217	0.783065
409.507	1.11946	1.48027	0.28427	0.596436	0.480486	1.94098		409.976	0.67074	0.622462	0.617326	0.0614808	0.646444	0.754986
410.007	3.02001	1.53231	0.337066	0.693266	0.454491	1.9088		410.476	0.694688	0.59946	0.618238	0.0567742	0.698671	0.726908
410.507	2.71559	1.50723	0.429223	0.848824	0.440932	1.8859		410.976	0.845302	0.578841	0.628006	0.0562055	0.757896	0.691754
411.007	2.63225	1.47553	0.504306	0.999529	0.425088	1.85593		411.476	1.00188	0.558333	0.638191	0.0558317	0.817451	0.656267
411.507	2.71584	1.43981	0.565017	1.14408	0.408081	1.82035		411.976	1.22387	0.542351	0.654174	0.0520572	0.894308	0.623885
412.007	2.91222	1.4027	0.614064	1.28119	0.391034	1.78064		412.476	1.46069	0.527394	0.67147	0.0475118	0.975087	0.592206
412.507	3.16727	1.3668	0.654151	1.40955	0.375069	1.73828		412.976	1.70617	0.510607	0.686767	0.0441165	1.04368	0.564961
413.007	3.42685	1.33472	0.687984	1.52787	0.361309	1.69474		413.476	1.95582	0.492939	0.701103	0.0412745	1.10641	0.539849
413.507	3.63683	1.30909	0.718267	1.63485	0.350877	1.65148		413.976	2.14019	0.475225	0.713148	0.0392428	1.1388	0.51613
414.007	3.74306	1.2925	0.747707	1.7292	0.344895	1.61		414.476	2.26785	0.457473	0.723204	0.0379148	1.14484	0.493623
414.507	3.69141	1.28757	0.779008	1.80961	0.344486	1.57175		414.976	2.34917	0.441099	0.73073	0.039159	1.12515	0.470661
415.007	3.00224	1.34066	0.790872	1.86844	0.357283	1.53196		415.476	2.35955	0.426835	0.734385	0.0443395	1.06609	0.447005
415.507	2.85821	1.18883	0.838431	1.98038	0.333986	1.49944		415.976	2.36412	0.413636	0.740241	0.0496667	0.9963	0.424845
416.007	2.6339	1.07431	0.875261	2.04992	0.317951	1.46387		416.476	2.3498	0.403903	0.753256	0.0554711	0.891659	0.407551
416.507	2.38134	0.991591	0.903678	2.08688	0.307523	1.42613		416.976	2.33418	0.393745	0.764625	0.0613201	0.78842	0.390054
417.007	2.15253	0.935157	0.926003	2.10111	0.301049	1.38713		417.476	2.30618	0.379533	0.760314	0.0675946	0.698527	0.370627
417.507	1.99947	0.899503	0.944555	2.10244	0.296874	1.34775		417.976	2.27817	0.365322	0.756003	0.0738691	0.608633	0.3512
418.007	1.97419	0.879123	0.961651	2.1007	0.293345	1.3089		418.476	2.22266	0.350883	0.752656	0.0829497	0.541608	0.333744
418.507	2.1287	0.868509	0.97961	2.10573	0.288807	1.27147		418.976	2.16586	0.336433	0.749354	0.0921614	0.475651	0.316381
419.007	2.51499	0.862153	1.00075	2.12737	0.281605	1.23636		419.476	2.02894	0.324765	0.744242	0.103903	0.430856	0.296518
419.507	3.18509	0.854546	1.0274	2.17545	0.270086	1.20445		419.976	1.87388	0.313727	0.738721	0.116218	0.390852	0.276089
420.007	3.976	0.819959	1.03171	2.17312	0.27183	1.16151		420.476	1.7056	0.301385	0.732884	0.122225	0.356461	0.260723
420.507	3.5523	0.786662	1.02371	2.19032	0.259247	1.12636		420.976	1.53097	0.288417	0.726896	0.125202	0.324766	0.247789
421.007	3.15336	0.755809	1.02408	2.21412	0.251955	1.09345		421.476	1.36249	0.276712	0.707245	0.132875	0.303241	0.234232
421.507	2.78287	0.727195	1.03059	2.24202	0.248737	1.06229		421.976	1.19933	0.266102	0.675748	0.144619	0.290534	0.220134
422.007	2.44451	0.700616	1.04095	2.2715	0.248377	1.03237		422.476	1.05155	0.256631	0.641525	0.17041	0.280613	0.207339
422.507	2.14198	0.67587	1.05291	2.30007	0.249659	1.00319		422.976	0.927257	0.248897	0.603138	0.217661	0.274947	0.196535
423.007	1.87895	0.652752	1.06422	2.32522	0.251363	0.974228		423.476	0.805654	0.241396	0.563173	0.27444	0.269434	0.185621
423.507	1.65913	0.63106	1.0726	2.34444	0.252275	0.944997		423.976	0.691887	0.234573	0.518608	0.358994	0.264367	0.174384
424.007	1.4862	0.610589	1.07579	2.35522	0.251177	0.914986		424.476	0.581927	0.227453	0.474659	0.445404	0.259014	0.163386
424.507	1.36385	0.591136	1.07154	2.35507	0.246852	0.883692		424.976	0.501088	0.218062	0.435426	0.546002	0.251468	0.154212
425.007	1.25905	0.594603	1.08802	2.38991	0.235719	0.86118		425.476	0.42025	0.20867	0.396193	0.6466	0.243922	0.145038
425.507	1.11518	0.586931	1.0828	2.35841	0.23491	0.835503		425.976	0.360005	0.199487	0.352334	0.723431	0.237839	0.134229
426.007	0.998965	0.565546	1.0721	2.32427	0.233086	0.806541		426.476	0.300276	0.19031	0.30836	0.799668	0.231792	0.123378
426.507	0.939078	0.536072	1.05842	2.28941	0.230469	0.77584		426.976	0.259267	0.184821	0.272234	0.857831	0.230718	0.116054
427.007	0.964181	0.504133	1.04424	2.25578	0.22728	0.744947		427.476	0.222485	0.180165	0.237881	0.911912	0.230766	0.109525
427.507	1.10294	0.475355	1.03204	2.2253	0.22374	0.715408		427.976	0.196274	0.17406	0.213114	0.941446	0.211538	0.103869
428.007	1.38402	0.455362	1.0243	2.19991	0.220069	0.68877		428.476	0.175135	0.16726	0.192946	0.959203	0.183061	0.0986314
428.507	1.83608	0.449779	1.02351	2.18154	0.216489	0.66658		428.976	0.153996	0.160461	0.172778	0.976961	0.154585	0.0933936
429.007	2.4878	0.464232	1.03216	2.17211	0.21322	0.650383		429.476	0.147138	0.153795	0.15631	0.987134	0.121979	0.0853911
429.507	3.36783	0.504344	1.05271	2.17357	0.210484	0.641726		429.976	0.140635	0.147134	0.139934	0.99712	0.0892713	0.0773201
430.007	2.97395	0.466983	1.08661	2.11675	0.212655	0.620498		430.476	0.155615	0.139381	0.127318	0.998921	0.0536878	0.0706287
430.507	2.63998	0.456687	1.07559	2.0763	0.226413	0.609684		430.976	0.17481	0.131414	0.115441	0.999115	0.0175403	0.0642079
431.007	2.3316	0.448791	1.07578	2.04368	0.22906	0.598198		431.476	0.196112	0.125994	0.102486	0.984811	0.00324304	0.0593323
431.507	2.04969	0.442946	1.08346	2.01778	0.224275	0.586169		431.976	0.218334	0.121686	0.0890595	0.964174	-0.00151038	0.0551317
432.007	1.79509	0.438801	1.09491	1.9975	0.215737	0.573727		432.476	0.242886	0.115854	0.0755494	0.939805	-0.00670875	0.0518741
432.507	1.56865	0.436008	1.1064	1.98171	0.207125	0.561		432.976	0.269299	0.108805	0.0619723	0.912456	-0.0122624	0.0493695
433.007	1.37125	0.434214	1.11422	1.96933	0.202116	0.548118		433.476	0.284976	0.103241	0.0496286	0.881391	-0.0168521	0.0469075
433.507	1.20373	0.433072	1.11463	1.95923	0.20439	0.535211		433.976	0.285569	0.0997635	0.0390179	0.845107	-0.0200874	0.0445051
434.007	1.06695	0.43223	1.10393	1.9503	0.217626	0.522406		434.476	0.296428	0.0964415	0.0302646	0.811078	-0.0216086	0.0419852
434.507	0.961763	0.431339	1.07838	1.94144	0.245501	0.509833		434.976	0.334217	0.0935282	0.0263838	0.782966	-0.0186331	0.039157
435.007	0.525393	0.41279	1.05175	1.90216	0.301439	0.491811		435.476	0.37899	0.0903704	0.0228918	0.754494	-0.0151537	0.0360938
435.507	0.757656	0.402804	1.02298	1.95971	0.388895	0.476613		435.976	0.476881	0.0853515	0.0223567	0.723277	-0.00784081	0.0312432
436.007	0.791672	0.400364	0.998133	1.97232	0.465094	0.462166		436.476	0.574772	0.0803326	0.0218216	0.69206	-0.000527937	0.0263927
436.507	0.710129	0.402974	0.976864	1.95009	0.530058	0.448285		436.976	0.663994	0.0781713	0.0224363	0.668402	0.00845052	0.0223901
437.007	0.59572	0.40814	0.958841	1.90312	0.583806	0.434786		437.476	0.753006	0.0760797	0.023079	0.644928	0.0174696	0.0184081
437.507	0.531134	0.413366	0.94373	1.84149	0.62636	0.421484		437.976	0.818592	0.0737526	0.027252	0.630827	0.0295272	0.0160142
438.007	0.599062	0.416159	0.931196	1.7753	0.657742	0.408195		438.476	0.878902	0.0713725	0.03222	0.618836	0.042269	0.0139779
438.507	0.882194	0.414023	0.920904	1.71466	0.677971	0.394734		438.976	0.893453	0.0677694	0.0360166	0.602913	0.05225	0.0136889
439.007	1.46322	0.404463	0.912519	1.66965	0.68707	0.380915		439.476	0.886092	0.0635807	0.0392523	0.585106	0.0609091	0.0142366
439.507	2.42483	0.384985	0.905706	1.65037	0.685059	0.366556		439.976	0.875092	0.0600022	0.043457	0.569326	0.0710867	0.0126951
440.007	3.94142	0.360975	0.88692	1.6528	0.677024	0.346569		440.476	0.860941	0.0569519	0.0485005	0.5553	0.0825789	0.00934487
440.507	3.42317	0.355885	0.853554	1.5706	0.679387	0.334544		440.976	0.843631	0.0537284	0.0532787	0.541204	0.0950723	0.00617878
441.007	2.96382	0.346646	0.818842	1.49435	0.67555	0.316555		441.476	0.796641	0.0488766	0.0555628	0.526447	0.116972	0.00474228
441.507	2.5595	0.336014	0.783274	1.4233	0.665967	0.296346		441.976	0.74965	0.0440248	0.0578469	0.511689	0.138871	0.00330578
442.007	2.20631	0.326745	0.747344	1.35669	0.651091	0.27766		442.476	0.69175	0.0421675	0.0620288	0.502816	0.166753	0.00203493
442.507	1.90037	0.321597	0.711544	1.29376	0.631374	0.264239		442.976	0.633351	0.0404473	0.0662976	0.494211	0.194909	0.000771669
443.007	1.63779	0.323326	0.676366	1.23375	0.60727	0.259828		443.476	0.584246	0.0363638	0.0746624	0.478648	0.24231	0.00175694
443.507	1.41469	0.334687	0.642303	1.1759	0.57923	0.268168		443.976	0.537232	0.0317487	0.0839483	0.46152	0.294041	0.00324788
444.007	1.22719	0.358438	0.609846	1.11946	0.547708	0.293003		444.476	0.497736	0.0300358	0.0975162	0.445868	0.337901	0.0042488
444.507	1.07139	0.397335	0.579487	1.06367	0.513157	0.338076		444.976	0.461835	0.0297114	0.113133	0.430923	0.377996	0.00501528
445.007	0.888471	0.456506	0.535578	1.03846	0.51894	0.388734		445.476	0.445539	0.0279095	0.123001	0.415833	0.424474	0.00550202
445.507	0.738735	0.60713	0.50017	1.0153	0.436786	0.501022		445.976	0.446185	0.0248306	0.127901	0.400618	0.476469	0.00574699
446.007	0.636411	0.747658	0.466679	0.989588	0.383384	0.608703		446.476	0.460438	0.0229465	0.130068	0.386066	0.535827	0.00491357
446.507	0.571832	0.87811	0.435034	0.961865	0.352691	0.711909		446.976	0.495427	0.0228835	0.128071	0.372522	0.606405	0.00243671
447.007	0.535331	0.998508	0.405162	0.932653	0.338664	0.810771		447.476	0.534124	0.022958	0.125748	0.359375	0.688573	-7.03925e-05
447.507	0.51724	1.10887	0.376993	0.90248	0.335259	0.90542		447.976	0.583572	0.0234314	0.12248	0.347381	0.804356	-0.00266522
448.007	0.507892	1.20923	0.350454	0.871873	0.336433	0.995985		448.476	0.631094	0.0239983	0.119989	0.335658	0.920883	-0.00463898
448.507	0.49762	1.29959	0.325475	0.841359	0.336143	1.0826		448.976	0.664021	0.0252734	0.123377	0.325987	1.04305	-0.00190733
449.007	0.476756	1.37998	0.301983	0.811467	0.328345	1.16539		449.476	0.696947	0.0265485	0.126766	0.316316	1.16521	0.000824308
449.507	0.435633	1.45043	0.279907	0.782722	0.306998	1.24449		449.976	0.722382	0.0245742	0.126636	0.309797	1.27986	0.00206835
450.007	0.417712	1.49792	0.259413	0.758916	0.284343	1.31389		450.476	0.747637	0.0225221	0.126422	0.303353	1.39433	0.00327674
450.507	0.374297	1.51454	0.238157	0.720029	0.271569	1.35794		450.976	0.758083	0.0206562	0.122805	0.291313	1.51069	0.0037417
451.007	0.354731	1.53458	0.221265	0.691928	0.262991	1.40448		451.476	0.765204	0.0188322	0.118424	0.278016	1.62748	0.0040397
451.507	0.352911	1.55641	0.207702	0.672324	0.257803	1.45303		451.976	0.757818	0.0182127	0.11365	0.26982	1.71955	0.00264144
452.007	0.362738	1.5784	0.196431	0.658925	0.2552	1.50309		452.476	0.743496	0.0181691	0.108689	0.264062	1.7998	0.000432411
452.507	0.37811	1.59891	0.186419	0.649439	0.254377	1.55417		452.976	0.71714	0.0181179	0.102642	0.258444	1.85693	-0.00124089
453.007	0.392928	1.6163	0.176628	0.641575	0.254527	1.6058		453.476	0.662269	0.018049	0.0940203	0.253155	1.8593	-0.00164491
453.507	0.40109	1.62895	0.166025	0.633042	0.254847	1.65746		453.976	0.615186	0.0179374	0.0868027	0.247912	1.84659	-0.0020113
454.007	0.396495	1.63521	0.153572	0.621549	0.254529	1.70869		454.476	0.609981	0.0175962	0.0871361	0.242906	1.75282	-0.00217538
454.507	0.373044	1.63345	0.138236	0.604804	0.252769	1.75898		454.976	0.60502	0.0172146	0.0876443	0.23782	1.65864	-0.00230552
455.007	0.313942	1.55378	0.127002	0.598825	0.281521	1.82102		455.476	0.617069	0.0140292	0.100285	0.227101	1.53646	-7.92362e-05
455.507	0.327873	1.59347	0.115417	0.561771	0.251102	1.85968		455.976	0.629117	0.0108438	0.112925	0.216382	1.41429	0.00214705
456.007	0.346125	1.62495	0.10354	0.532867	0.232561	1.89812		456.476	0.694645	0.00935854	0.140909	0.208208	1.31893	0.00162046
456.507	0.366398	1.64884	0.091939	0.510808	0.223708	1.93571		456.976	0.767716	0.00811307	0.171058	0.200393	1.22736	0.00070563
457.007	0.38639	1.66578	0.0811806	0.494286	0.222355	1.97181		457.476	0.86987	0.00709349	0.200079	0.199434	1.14043	0.00123865
457.507	0.4038	1.67641	0.0718315	0.481994	0.226311	2.00579		457.976	0.983503	0.00616306	0.228655	0.201181	1.05534	0.00234315
458.007	0.416327	1.68137	0.0644586	0.472627	0.233387	2.03702		458.476	1.13278	0.00587344	0.253751	0.206055	0.968672	0.00273288
458.507	0.42167	1.68128	0.0596289	0.464876	0.241394	2.06486		458.976	1.3082	0.00605398	0.276292	0.213223	0.880848	0.0025982
459.007	0.417527	1.6768	0.0579092	0.457437	0.248143	2.0887		459.476	1.44687	0.0048611	0.301338	0.21761	0.791485	0.00398761
459.507	0.401597	1.66855	0.0598664	0.449002	0.251444	2.10789		459.976	1.53817	0.00189882	0.329613	0.218414	0.700139	0.00734055
460.007	0.370642	1.67143	0.0672125	0.427914	0.252318	2.10315		460.476	1.60123	-0.00104642	0.356396	0.21886	0.616752	0.00866162
460.507	0.380834	1.63632	0.0476407	0.41505	0.30178	2.1641		460.976	1.59743	-0.00395133	0.379647	0.218457	0.552202	0.00517319
461.007	0.389245	1.61452	0.0356521	0.406616	0.334473	2.20614		461.476	1.5771	-0.00603319	0.402728	0.219218	0.490271	0.00230751
461.507	0.396908	1.60287	0.0293712	0.401104	0.353841	2.23386		461.976	1.46816	-0.00370237	0.424894	0.226222	0.442384	0.00278055
462.007	0.404856	1.59824	0.0269227	0.397006	0.363328	2.25188		462.476	1.35931	-0.00138993	0.446884	0.233267	0.394569	0.00326917
462.507	0.414124	1.59748	0.0264313	0.392815	0.36638	2.2648		462.976	1.25673	-0.000193332	0.45821	0.242817	0.351191	0.00470347
463.007	0.425744	1.59743	0.0260215	0.387023	0.36644	2.27722		463.476	1.15414	0.00100327	0.469536	0.252368	0.307813	0.00613778
463.507	0.44075	1.59496	0.0238182	0.378122	0.366954	2.29375		463.976	1.06126	0.00351817	0.473399	0.253551	0.286772	0.0102843
464.007	0.460175	1.5869	0.0179458	0.364604	0.371366	2.31898		464.476	0.969729	0.00621762	0.476217	0.253562	0.268857	0.0148105
464.507	0.485054	1.57012	0.00652915	0.344962	0.38312	2.35753		464.976	0.886483	0.00696309	0.472268	0.247297	0.275456	0.017971
465.007	0.47326	1.54314	-0.000437298	0.320137	0.395453	2.37903		465.476	0.814807	0.00497899	0.458865	0.232264	0.316301	0.0192238
465.507	0.504847	1.55965	0.00404365	0.336985	0.386595	2.41152		465.976	0.746859	0.00325965	0.438243	0.217126	0.378059	0.0195008
466.007	0.52184	1.56026	0.00558388	0.347007	0.382452	2.42639		466.476	0.688626	0.00223	0.39882	0.201715	0.494298	0.0172362
466.507	0.528378	1.55	0.00523549	0.351497	0.38284	2.42793		466.976	0.631083	0.00125352	0.357984	0.186783	0.622612	0.015031
467.007	0.528601	1.5339	0.00405058	0.351749	0.387579	2.42041		467.476	0.577872	0.00061088	0.308279	0.17485	0.826729	0.0131983
467.507	0.526647	1.51697	0.00308125	0.349055	0.396485	2.40812		467.976	0.524661	-3.17568e-05	0.258575	0.162916	1.03085	0.0113656
468.007	0.526655	1.50425	0.0033796	0.344708	0.409378	2.39534		468.476	0.488124	0.000195078	0.215598	0.154719	1.25711	0.00961508
468.507	0.532765	1.50075	0.00599774	0.340003	0.426075	2.38635		468.976	0.451634	0.000424353	0.172641	0.146532	1.48343	0.00786482
469.007	0.549115	1.51151	0.0119878	0.336232	0.446393	2.38543		469.476	0.442651	0.000391202	0.143146	0.139212	1.73289	0.00803352
469.507	0.579845	1.54154	0.0224018	0.334689	0.470151	2.39686		469.976	0.438249	0.000314333	0.115894	0.132037	1.9862	0.00852188
470.007	0.649115	1.56386	0.0300038	0.339707	0.5049	2.39059		470.476	0.440986	-0.000623219	0.0963744	0.125832	2.21046	0.00750433
470.507	0.779643	1.56929	0.0283298	0.328984	0.530004	2.38832		470.976	0.446817	-0.00193387	0.080206	0.120047	2.42213	0.00583398
471.007	0.854655	1.56777	0.0276872	0.319733	0.550461	2.38278		471.476	0.485952	-0.00117879	0.0627584	0.115783	2.5925	0.00360827
471.507	0.884816	1.56062	0.027746	0.312129	0.567368	2.37425		471.976	0.551533	0.00121655	0.0442949	0.112728	2.73007	0.00094158
472.007	0.880792	1.54918	0.0281761	0.30635	0.581822	2.36301		472.476	0.616753	0.00458969	0.0276162	0.108839	2.80516	0.000542703
472.507	0.853246	1.53475	0.0286474	0.302573	0.594921	2.34937		472.976	0.681471	0.00932764	0.0134287	0.103789	2.79302	0.00330921
473.007	0.812845	1.51867	0.0288298	0.300975	0.60776	2.3336		473.476	0.748398	0.0122792	0.000998829	0.0998404	2.74698	0.0058585
473.507	0.770254	1.50224	0.0283933	0.301734	0.621437	2.31598		473.976	0.821079	0.0105775	-0.00685278	0.0987593	2.61263	0.00784199
474.007	0.736136	1.4868	0.0270076	0.305026	0.637049	2.29681		474.476	0.886526	0.0087383	-0.0137316	0.0982796	2.46892	0.00976065
474.507	0.721158	1.47367	0.0243428	0.311029	0.655693	2.27638		474.976	0.906629	0.00603709	-0.0145137	0.101569	2.26662	0.0112729
475.007	0.785496	1.45548	0.0262063	0.337656	0.657732	2.25211		475.476	0.926732	0.00333588	-0.0152957	0.104858	2.06433	0.0127852
475.507	0.752311	1.44986	0.029648	0.326136	0.635393	2.25325		475.976	0.913748	0.00348734	-0.0128994	0.111006	1.87428	0.0121895
476.007	0.737538	1.45279	0.0306576	0.318455	0.625751	2.24884		476.476	0.900678	0.00364624	-0.0104947	0.117162	1.68425	0.0115883
476.507	0.735936	1.46163	0.0297513	0.31399	0.625324	2.23858		476.976	0.906496	0.00580731	-0.00896952	0.121124	1.48796	0.0120919
477.007	0.742266	1.47374	0.0274453	0.312117	0.630628	2.22213		477.476	0.929932	0.00983588	-0.00826459	0.123041	1.28581	0.0136261
477.507	0.751288	1.48651	0.024256	0.31221	0.63818	2.1992		477.976	0.951123	0.0123607	-0.00572464	0.123079	1.09924	0.0153861
478.007	0.757762	1.4973	0.0206994	0.313646	0.644497	2.16945		478.476	0.968617	0.0124089	-0.0001626	0.120024	0.938345	0.0175179
478.507	0.756447	1.50348	0.0172919	0.3158	0.646096	2.13258		478.976	0.98111	0.0120526	0.00585516	0.116399	0.792812	0.0188406
479.007	0.742103	1.50241	0.0145498	0.318048	0.639492	2.08826		479.476	0.977572	0.0103996	0.0133336	0.110951	0.696531	0.0175698
479.507	0.709491	1.49147	0.0129892	0.319766	0.621204	2.03618		479.976	0.966445	0.00901287	0.0209666	0.105611	0.605808	0.0164805
480.007	0.338611	1.47814	0.0300314	0.316128	0.604856	1.97965		480.476	0.885307	0.0100821	0.0300254	0.101269	0.566354	0.017065
480.507	0.621822	1.51772	0.0147897	0.327315	0.577931	1.93349		480.976	0.804169	0.0111514	0.0390842	0.096927	0.5269	0.0176494
481.007	0.748363	1.53305	0.00527455	0.33409	0.557991	1.91334		481.476	0.685427	0.0178101	0.0487746	0.0905501	0.526718	0.0197166
481.507	0.764493	1.529	0.000347146	0.337351	0.5443	1.91255		481.976	0.565019	0.0247163	0.0584929	0.0840832	0.528274	0.0218494
482.007	0.716474	1.51043	-0.00113132	0.337997	0.536123	1.92449
482.507	0.650563	1.48221	-0.000299667	0.336927	0.532725	1.94254
483.007	0.613023	1.44919	0.00170331	0.335042	0.533372	1.96006
483.507	0.650113	1.41624	0.00373879	0.33324	0.537327	1.97041
484.007	0.808092	1.38823	0.00466796	0.33242	0.543856	1.96696
484.507	1.13322	1.37	0.00335201	0.333481	0.552223	1.94308
485.007	2.10561	1.3505	0.00740406	0.337636	0.526132	1.91731
485.507	2.28796	1.37652	0.000384295	0.342575	0.549872	1.91942
486.007	2.28061	1.39051	-0.00142444	0.344868	0.554935	1.91411
486.507	2.1312	1.39475	0.000516251	0.345078	0.545561	1.90491
487.007	1.88735	1.39157	0.00474477	0.343767	0.525991	1.89535
487.507	1.59669	1.38325	0.00979952	0.341499	0.500464	1.88898
488.007	1.30688	1.3721	0.0142189	0.338836	0.473222	1.88932
488.507	1.06553	1.36043	0.0165413	0.336342	0.448505	1.89993
489.007	0.920284	1.35054	0.0153051	0.334579	0.430554	1.92433
489.507	0.918776	1.34473	0.00904873	0.33411	0.423608	1.96606
490.007	0.753282	1.3733	0.0125452	0.342619	0.398452	1.95563
490.507	0.738734	1.32578	0.00468587	0.347473	0.40628	1.93012
491.007	0.697351	1.30207	0.00254964	0.34997	0.412308	1.91215
491.507	0.634585	1.29613	0.00467815	0.350986	0.416397	1.89956
492.007	0.555889	1.30196	0.00961301	0.3514	0.418407	1.89021
492.507	0.466715	1.31353	0.0158959	0.352088	0.418199	1.88195
493.007	0.372516	1.32483	0.0220683	0.353928	0.415634	1.87263
493.507	0.278743	1.32983	0.026672	0.357796	0.410573	1.86011
494.007	0.19085	1.32252	0.0282486	0.364571	0.402876	1.84222
494.507	0.114289	1.29687	0.0253396	0.37513	0.392404	1.81684
495.007	0.346935	1.26543	-0.0105204	0.369861	0.360468	1.7835
495.507	0.110188	1.21629	0.0106049	0.390612	0.368089	1.75663
496.007	-0.0199804	1.19002	0.0220435	0.406116	0.37147	1.73282
496.507	-0.0598455	1.17994	0.0260914	0.416895	0.371893	1.71267
497.007	-0.0256829	1.17939	0.0250446	0.423472	0.370643	1.69681
497.507	0.0662319	1.1817	0.021199	0.426369	0.369002	1.68583
498.007	0.199623	1.18018	0.0168505	0.426109	0.368252	1.68036
498.507	0.358215	1.16817	0.0142953	0.423215	0.369678	1.68101
499.007	0.525733	1.13899	0.0158291	0.41821	0.374561	1.68839
499.507	0.6859	1.08598	0.0237479	0.411616	0.384185	1.70312
500.007	0.723934	1.02871	-0.00741829	0.381895	0.372425	1.74888
500.507	0.653233	0.981742	0.0654448	0.374362	0.458986	1.71049
501.007	0.613634	0.947356	0.11543	0.367112	0.526772	1.68615
501.507	0.597789	0.924613	0.145626	0.360523	0.57752	1.67324
502.007	0.598351	0.912573	0.15912	0.354973	0.612969	1.66913
502.507	0.607973	0.910297	0.159001	0.35084	0.634859	1.67121
503.007	0.619306	0.916844	0.148357	0.348503	0.644927	1.67685
503.507	0.625005	0.931274	0.130276	0.348338	0.644913	1.68342
504.007	0.617721	0.952647	0.107847	0.350725	0.636555	1.68832
504.507	0.590107	0.980024	0.0841574	0.356041	0.621592	1.6889
505.007	1.10921	1.0095	0.0898795	0.376963	0.591894	1.71554
505.507	0.379445	1.00884	0.0612717	0.378051	0.585132	1.70682
506.007	0.239846	1.01623	0.0475592	0.386931	0.576855	1.68808
506.507	0.535315	1.02918	0.0460672	0.402733	0.568092	1.66248
507.007	1.11075	1.04518	0.054121	0.424592	0.559872	1.63316
507.507	1.81106	1.06176	0.0690458	0.45164	0.553224	1.60327
508.007	2.48113	1.0764	0.0881669	0.483011	0.549175	1.57596
508.507	2.96586	1.08661	0.10881	0.517837	0.548755	1.55438
509.007	3.11017	1.0899	0.128299	0.555252	0.552991	1.54167
509.507	2.75894	1.08377	0.14396	0.594388	0.562913	1.54099
510.007	2.27195	1.08981	0.120249	0.612951	0.556877	1.55466
510.507	1.96446	1.08025	0.0969951	0.632515	0.548007	1.58494
511.007	1.71378	1.08512	0.0807193	0.64514	0.548556	1.62038
511.507	1.51132	1.10046	0.0701606	0.651948	0.554986	1.65742
512.007	1.34846	1.1223	0.0640578	0.654061	0.563758	1.69247
512.507	1.21661	1.14666	0.06115	0.652601	0.571336	1.72195
513.007	1.10716	1.16956	0.0601762	0.648689	0.57418	1.74228
513.507	1.01151	1.18704	0.0598755	0.643448	0.568753	1.74987
514.007	0.921045	1.19512	0.0589868	0.637999	0.551516	1.74114
514.507	0.827169	1.18984	0.0562491	0.633463	0.518932	1.71252
515.007	0.759218	1.16684	0.0588828	0.62226	0.498795	1.68573
515.507	0.66772	1.17963	0.0575589	0.626111	0.493682	1.66084
516.007	0.59056	1.18685	0.0582344	0.626151	0.491107	1.63627
516.507	0.527584	1.18944	0.0603306	0.622718	0.490113	1.61211
517.007	0.478638	1.18835	0.0632686	0.616149	0.489744	1.58843
517.507	0.443567	1.18454	0.0664695	0.606783	0.489045	1.5653
518.007	0.422218	1.17893	0.0693544	0.594958	0.487059	1.5428
518.507	0.414437	1.1725	0.0713445	0.581012	0.482829	1.521
519.007	0.420069	1.16617	0.0718607	0.565284	0.475401	1.49999
519.507	0.43896	1.1609	0.0703244	0.54811	0.463818	1.47983
520.007	0.447846	1.16585	0.0591156	0.515132	0.458187	1.48705
520.507	0.524854	1.12735	0.0606268	0.522127	0.45312	1.45313
521.007	0.566429	1.08739	0.0607967	0.524469	0.444539	1.42842
521.507	0.579701	1.04799	0.0596437	0.52298	0.433611	1.41091
522.007	0.571799	1.01113	0.0571864	0.518482	0.421499	1.39857
522.507	0.549852	0.978812	0.0534432	0.5118	0.409368	1.38939
523.007	0.520988	0.953048	0.0484326	0.503755	0.398382	1.38136
523.507	0.492336	0.935832	0.0421731	0.495172	0.389706	1.37246
524.007	0.471026	0.929166	0.0346832	0.486872	0.384503	1.36068
524.507	0.464187	0.93505	0.0259813	0.47968	0.383938	1.34399
525.007	0.462234	0.996869	0.0209813	0.458879	0.38145	1.32859
525.507	0.459249	1.05753	0.0233038	0.480708	0.374697	1.32154
526.007	0.452832	1.09967	0.0234958	0.492174	0.372015	1.31105
526.507	0.444232	1.12585	0.022072	0.495342	0.371698	1.29836
527.007	0.434698	1.13863	0.0195469	0.492279	0.37204	1.28471
527.507	0.42548	1.14054	0.0164351	0.485052	0.371333	1.27135
528.007	0.417826	1.13414	0.0132513	0.475727	0.367872	1.25953
528.507	0.412986	1.12198	0.0105101	0.46637	0.35995	1.25049
529.007	0.41221	1.10662	0.00872593	0.459048	0.34586	1.24548
529.507	0.416747	1.0906	0.00841354	0.455828	0.323895	1.24574
530.007	0.428322	1.09546	0.00803099	0.460538	0.337467	1.22476
530.507	0.394715	1.11652	0.0114886	0.469138	0.327743	1.23187
531.007	0.37374	1.11702	0.0135459	0.469415	0.316908	1.23493
531.507	0.362495	1.10224	0.0144765	0.463925	0.305971	1.2346
532.007	0.358077	1.07743	0.014554	0.455222	0.295944	1.23152
532.507	0.357581	1.04786	0.0140521	0.445858	0.287837	1.22632
533.007	0.358107	1.01881	0.0132445	0.438389	0.282663	1.21966
533.507	0.356749	0.995515	0.0124047	0.435367	0.281431	1.21216
534.007	0.350606	0.983257	0.0118063	0.439347	0.285153	1.20448
534.507	0.336774	0.987296	0.0117231	0.452883	0.29484	1.19726
535.007	0.376832	0.98903	0.0134561	0.469005	0.278732	1.19853
535.507	0.395363	0.958919	0.0172046	0.452223	0.288887	1.18324
536.007	0.409772	0.941496	0.0179216	0.44105	0.291082	1.17191
536.507	0.420398	0.933464	0.0165603	0.434637	0.286892	1.16369
537.007	0.42758	0.931525	0.0140741	0.432133	0.277892	1.15773
537.507	0.431656	0.932382	0.0114164	0.432686	0.265657	1.15316
538.007	0.432966	0.932739	0.00954055	0.435448	0.251762	1.14913
538.507	0.431847	0.929297	0.00939987	0.439565	0.237783	1.14476
539.007	0.428638	0.91876	0.0119477	0.444189	0.225293	1.13921
539.507	0.423679	0.897829	0.0181375	0.448468	0.215868	1.13162
540.007	0.381849	0.886425	0.0381298	0.462158	0.176782	1.14724
540.507	0.376153	0.860967	0.0245517	0.452446	0.193434	1.11645
541.007	0.364428	0.845404	0.0136691	0.44789	0.200744	1.09927
541.507	0.349365	0.838854	0.00555637	0.447535	0.200907	1.09391
542.007	0.333658	0.84044	0.000287915	0.450426	0.196116	1.09855
542.507	0.319999	0.84928	-0.00206188	0.455608	0.188566	1.11139
543.007	0.311083	0.864496	-0.00141863	0.462126	0.180449	1.13063
543.507	0.309602	0.885207	0.00229205	0.469025	0.173961	1.15445
544.007	0.318248	0.910535	0.00914455	0.47535	0.171296	1.18106
544.507	0.339714	0.939598	0.0192133	0.480146	0.174646	1.20864
545.007	0.300872	0.953494	0.00686969	0.484953	0.158929	1.2314
545.507	0.380621	0.975929	0.0322102	0.485046	0.192091	1.21936
546.007	0.433554	1.00148	0.0483738	0.484367	0.219969	1.21634
546.507	0.465189	1.02861	0.0569475	0.48355	0.242635	1.22018
547.007	0.481046	1.05575	0.0595179	0.483227	0.260165	1.22869
547.507	0.486647	1.08137	0.0576718	0.484031	0.272632	1.2397
548.007	0.487511	1.10391	0.052996	0.486595	0.28011	1.25104
548.507	0.489158	1.12182	0.0470774	0.491552	0.282674	1.26051
549.007	0.497108	1.13356	0.0415027	0.499534	0.280399	1.26596
549.507	0.516882	1.13758	0.0378588	0.511175	0.273357	1.26519
550.007	0.407026	1.13211	0.0193171	0.536169	0.297509	1.27914
550.507	0.751281	1.17336	0.0153157	0.538186	0.300921	1.29488
551.007	0.901364	1.20998	0.0130715	0.548768	0.295367	1.30721
551.507	0.91927	1.24314	0.0124667	0.566608	0.283998	1.31671
552.007	0.86699	1.27404	0.0133836	0.590394	0.269962	1.32398
552.507	0.806517	1.30383	0.0157044	0.618818	0.256408	1.32962
553.007	0.799844	1.33372	0.0193112	0.650571	0.246485	1.33423
553.507	0.908964	1.36488	0.0240863	0.684342	0.243341	1.33838
554.007	1.19587	1.3985	0.0299118	0.718823	0.250125	1.34269
554.507	1.72255	1.43575	0.03667	0.752705	0.269987	1.34775
555.007	3.03135	1.42915	0.0331803	0.76804	0.280632	1.32809
555.507	3.10442	1.45296	0.027341	0.7632	0.282626	1.33308
556.007	2.99994	1.4731	0.0239189	0.76	0.281932	1.33674
556.507	2.76186	1.48941	0.0224795	0.757654	0.279119	1.33897
557.007	2.43413	1.5017	0.0225887	0.755371	0.274759	1.33968
557.507	2.06073	1.50979	0.0238122	0.752364	0.269422	1.33878
558.007	1.68559	1.51351	0.0257156	0.747845	0.26368	1.33615
558.507	1.35268	1.51268	0.0278647	0.741024	0.258102	1.33171
559.007	1.10596	1.50713	0.0298252	0.731114	0.25326	1.32536
559.507	0.989384	1.49668	0.0311629	0.717325	0.249724	1.317
560.007	0.908347	1.45042	0.0467291	0.677434	0.248544	1.28325
560.507	0.790997	1.47461	0.0413387	0.690857	0.233013	1.28415
561.007	0.68565	1.4888	0.0367381	0.693887	0.224184	1.27783
561.507	0.601535	1.49336	0.033146	0.688733	0.219934	1.26666
562.007	0.547883	1.48866	0.030781	0.677603	0.218138	1.25302
562.507	0.533922	1.47505	0.029862	0.662706	0.216671	1.23929
563.007	0.568882	1.45291	0.0306075	0.646249	0.213409	1.22784
563.507	0.661995	1.42259	0.0332363	0.630442	0.206227	1.22104
564.007	0.822488	1.38446	0.037967	0.617493	0.193001	1.22126
564.507	1.05959	1.33888	0.0450184	0.60961	0.171607	1.23088
565.007	1.20328	1.30755	0.0709607	0.591969	0.15921	1.27847
565.507	1.05683	1.2996	0.0749925	0.599429	0.161206	1.25108
566.007	0.935661	1.29877	0.0758979	0.598231	0.164573	1.2346
566.507	0.835303	1.30293	0.0747197	0.590871	0.169202	1.22714
567.007	0.751275	1.30996	0.0725007	0.579842	0.17498	1.22679
567.507	0.679101	1.31774	0.0702835	0.567638	0.181799	1.23165
568.007	0.614303	1.32414	0.0691109	0.556753	0.189547	1.23981
568.507	0.552406	1.32704	0.0700256	0.549681	0.198113	1.24937
569.007	0.488932	1.3243	0.0740704	0.548916	0.207388	1.25842
569.507	0.419403	1.31382	0.0822878	0.556953	0.217261	1.26507
570.007	0.577956	1.30875	0.0888947	0.563382	0.237621	1.27023
570.507	0.179057	1.29429	0.088664	0.558399	0.293471	1.26877
571.007	0.442301	1.27778	0.107661	0.548225	0.356029	1.26188
571.507	1.15398	1.25972	0.139871	0.53471	0.421304	1.24986
572.007	2.1004	1.24059	0.179283	0.519702	0.485306	1.23305
572.507	3.06785	1.22088	0.219882	0.505046	0.544044	1.21175
573.007	3.84262	1.20108	0.255655	0.492592	0.593526	1.18629
573.507	4.21102	1.18167	0.280589	0.484187	0.629763	1.15698
574.007	3.95934	1.16315	0.28867	0.481679	0.648764	1.12414
574.507	2.87387	1.146	0.273886	0.486915	0.646537	1.08809
575.007	2.68652	1.11921	0.259188	0.486606	0.630948	1.06103
575.507	2.36431	1.10207	0.234361	0.488893	0.603842	1.04093
576.007	2.06392	1.08629	0.212215	0.488976	0.576147	1.02809
576.507	1.78767	1.07186	0.192432	0.487227	0.54835	1.02028
577.007	1.53786	1.05876	0.174695	0.48402	0.52094	1.01529
577.507	1.31678	1.04697	0.158688	0.479728	0.494406	1.01089
578.007	1.12675	1.03648	0.144093	0.474723	0.469237	1.00486
578.507	0.970068	1.02727	0.130593	0.469378	0.445921	0.994976
579.007	0.849035	1.01933	0.117872	0.464068	0.424947	0.979026
579.507	0.765956	1.01264	0.105611	0.459164	0.406804	0.954785
580.007	0.5217	1.01971	0.092536	0.451678	0.38305	0.947237
580.507	0.655339	1.02762	0.100019	0.453413	0.372733	0.955424
581.007	0.626096	1.01196	0.0950161	0.450642	0.361372	0.954883
581.507	0.504283	0.979233	0.0831093	0.445842	0.348403	0.948165
582.007	0.360209	0.935962	0.0698797	0.44149	0.333264	0.937818
582.507	0.264184	0.88865	0.0609086	0.440061	0.31539	0.926392
583.007	0.286519	0.843806	0.0617773	0.444034	0.294216	0.916436
583.507	0.497524	0.807941	0.0780673	0.455883	0.269179	0.910499
584.007	0.96751	0.787563	0.11536	0.478087	0.239716	0.911129
584.507	1.76679	0.789181	0.179236	0.513122	0.205261	0.920878
585.007	4.0842	0.767843	0.278259	0.534922	0.206791	0.932714
585.507	3.69128	0.78366	0.355446	0.601161	0.192886	0.919992
586.007	3.30873	0.790108	0.397973	0.646739	0.182282	0.908757
586.507	2.94068	0.789414	0.412108	0.675058	0.174218	0.89923
587.007	2.59126	0.783808	0.404121	0.689523	0.167932	0.891631
587.507	2.26461	0.775518	0.380279	0.693535	0.16266	0.886181
588.007	1.96486	0.766774	0.346852	0.690499	0.157642	0.883101
588.507	1.69615	0.759803	0.310107	0.683816	0.152116	0.88261
589.007	1.46262	0.756834	0.276312	0.67689	0.145319	0.88493
589.507	1.2684	0.760096	0.251737	0.673124	0.136489	0.89028
590.007	1.08027	0.756934	0.24007	0.688177	0.117701	0.885582
590.507	0.936534	0.7718	0.214796	0.673555	0.126379	0.896766
591.007	0.810683	0.791106	0.195708	0.666339	0.125449	0.904945
591.507	0.701884	0.81355	0.181354	0.664556	0.11686	0.91178
592.007	0.6093	0.837831	0.170284	0.666236	0.102565	0.918933
592.507	0.532094	0.862646	0.161046	0.669404	0.0845137	0.928065
593.007	0.469428	0.886693	0.152189	0.672088	0.0646579	0.940836
593.507	0.420467	0.90867	0.142262	0.672317	0.0449486	0.958908
594.007	0.384373	0.927276	0.129814	0.668117	0.0273368	0.983942
594.507	0.360309	0.941208	0.113394	0.657515	0.0137736	1.0176
595.007	0.0024723	0.957954	0.0767389	0.63538	-0.0292666	1.09206
595.507	0.312994	0.91203	0.0960666	0.606951	0.0377247	1.08439
596.007	0.515873	0.874149	0.128854	0.587525	0.0990088	1.07014
596.507	0.65726	0.843095	0.172228	0.575021	0.155271	1.0509
597.007	0.783307	0.817655	0.223315	0.567357	0.207195	1.02824
597.507	0.940164	0.796617	0.279245	0.562451	0.255468	1.00372
598.007	1.17398	0.778765	0.337142	0.558223	0.300773	0.97894
598.507	1.53091	0.762888	0.394136	0.55259	0.343797	0.955461
599.007	2.05711	0.747772	0.447354	0.543472	0.385223	0.934863
599.507	2.79872	0.732202	0.493922	0.528786	0.425737	0.918722
600.007	4.97015	0.660649	0.558439	0.519277	0.468975	0.878761
600.507	4.34236	0.68885	0.600173	0.50651	0.490354	0.876439
601.007	3.77197	0.701774	0.64207	0.494697	0.516566	0.863992
601.507	3.26099	0.70271	0.681564	0.484298	0.545128	0.843077
602.007	2.81139	0.694947	0.716087	0.475774	0.573557	0.815354
602.507	2.42518	0.681774	0.743073	0.469584	0.599371	0.78248
603.007	2.10435	0.66648	0.759952	0.466188	0.620088	0.746114
603.507	1.85089	0.652354	0.76416	0.466048	0.633226	0.707915
604.007	1.66679	0.642685	0.753127	0.469622	0.636302	0.669539
604.507	1.55405	0.640761	0.724288	0.477372	0.626834	0.632647
605.007	1.53856	0.713024	0.685346	0.495364	0.638365	0.602227
605.507	1.36424	0.641978	0.649536	0.477822	0.594851	0.583228
606.007	1.20916	0.595701	0.613196	0.460456	0.560632	0.569698
606.507	1.07313	0.570493	0.57743	0.443945	0.533959	0.561397
607.007	0.955918	0.562655	0.543342	0.428966	0.513081	0.558083
607.507	0.85733	0.568485	0.512039	0.416199	0.496251	0.559516
608.007	0.777156	0.584284	0.484623	0.406322	0.481717	0.565456
608.507	0.715189	0.606351	0.462202	0.400013	0.46773	0.575663
609.007	0.67122	0.630987	0.445878	0.397952	0.45254	0.589895
609.507	0.645043	0.654491	0.436758	0.400816	0.434399	0.607913
610.007	0.60494	0.71009	0.422947	0.422573	0.420619	0.599948
610.507	0.605588	0.728919	0.394446	0.407303	0.390491	0.653601
611.007	0.601029	0.743491	0.366123	0.390949	0.35977	0.709656
611.507	0.591673	0.755241	0.339079	0.374678	0.32954	0.766803
612.007	0.577932	0.765607	0.314415	0.359654	0.300884	0.823728
612.507	0.560215	0.776025	0.293231	0.347045	0.274886	0.879119
613.007	0.538934	0.787933	0.276628	0.338014	0.252628	0.931665
613.507	0.514499	0.802766	0.265707	0.333729	0.235196	0.980053
614.007	0.487321	0.821962	0.261568	0.335355	0.22367	1.02297
614.507	0.457811	0.846958	0.265314	0.344058	0.219136	1.05911
615.007	0.431937	0.836776	0.278534	0.343079	0.204143	1.10617
615.507	0.454988	0.900593	0.284331	0.359115	0.217084	1.14771
616.007	0.46245	0.940102	0.282072	0.372778	0.217454	1.18027
616.507	0.460247	0.961205	0.274038	0.384717	0.209302	1.20606
617.007	0.454303	0.969804	0.26251	0.39558	0.196673	1.22726
617.507	0.450544	0.9718	0.249769	0.406017	0.183615	1.24606
618.007	0.454895	0.973094	0.238096	0.416677	0.174175	1.26465
618.507	0.47328	0.97959	0.229771	0.428208	0.172401	1.28522
619.007	0.511624	0.997189	0.227076	0.441259	0.182338	1.30996
619.507	0.575851	1.03179	0.23229	0.45648	0.208034	1.34107
620.007	1.26348	1.04402	0.21006	0.432605	0.211815	1.36371
620.507	2.5229	1.05309	0.202336	0.506494	0.188449	1.37139
621.007	3.20831	1.05962	0.194648	0.560404	0.171594	1.38145
621.507	3.43165	1.06404	0.187385	0.598883	0.160091	1.39308
622.007	3.30491	1.06678	0.180941	0.626481	0.152783	1.40544
622.507	2.94005	1.06825	0.175706	0.64775	0.14851	1.4177
623.007	2.44904	1.06889	0.172074	0.667237	0.146116	1.42903
623.507	1.94384	1.06913	0.170435	0.689494	0.144442	1.4386
624.007	1.53642	1.06939	0.171182	0.719071	0.142331	1.44557
624.507	1.33875	1.07009	0.174706	0.760516	0.138623	1.44912
625.007	1.27313	1.04559	0.209719	0.791602	0.108866	1.42878
625.507	1.18566	1.10166	0.180185	0.827391	0.118644	1.44559
626.007	1.09792	1.14103	0.158601	0.850814	0.121009	1.45877
626.507	1.0138	1.16728	0.143759	0.865595	0.118207	1.46904
627.007	0.93719	1.18403	0.134448	0.875459	0.112486	1.47712
627.507	0.871967	1.19487	0.129459	0.884131	0.106095	1.48377
628.007	0.82202	1.20339	0.127583	0.895336	0.10128	1.48969
628.507	0.791233	1.2132	0.12761	0.912799	0.10029	1.49563
629.007	0.783492	1.22791	0.128329	0.940245	0.105372	1.50231
629.507	0.802682	1.2511	0.128533	0.981397	0.118774	1.51046
630.007	0.847294	1.26278	0.116256	1.04684	0.122538	1.50778
630.507	0.809436	1.26209	0.126392	1.0502	0.133797	1.50906
631.007	0.795076	1.25123	0.130651	1.05305	0.13977	1.50685
631.507	0.79881	1.2336	0.130566	1.05584	0.14156	1.50247
632.007	0.815233	1.2126	0.127669	1.05899	0.140267	1.49726
632.507	0.838939	1.19164	0.123492	1.06295	0.136993	1.49252
633.007	0.864522	1.17413	0.11957	1.06814	0.13284	1.48959
633.507	0.886578	1.16348	0.117433	1.075	0.128909	1.48979
634.007	0.899702	1.16309	0.118616	1.08397	0.126302	1.49443
634.507	0.898488	1.17637	0.124651	1.09548	0.12612	1.50485
635.007	0.899049	1.20081	0.105459	1.07084	0.122957	1.51699
635.507	2.43917	1.18699	0.141392	1.13204	0.117483	1.50178
636.007	3.32676	1.17116	0.163119	1.17681	0.111192	1.49143
636.507	3.68527	1.1549	0.174204	1.20809	0.1065	1.48448
637.007	3.63815	1.13978	0.178209	1.22883	0.105823	1.47948
637.507	3.30886	1.12735	0.178698	1.24198	0.111576	1.47498
638.007	2.82086	1.11918	0.179234	1.2505	0.126175	1.46953
638.507	2.29762	1.11684	0.183378	1.25731	0.152035	1.46168
639.007	1.86258	1.1219	0.194695	1.26539	0.191572	1.44997
639.507	1.6392	1.13593	0.216747	1.27767	0.247202	1.43295
640.007	1.15124	1.16362	0.235812	1.31068	0.284571	1.42227
640.507	1.26286	1.15786	0.244624	1.30096	0.363343	1.40008
641.007	1.18401	1.14307	0.249748	1.2773	0.446261	1.37643
641.507	1.00343	1.12134	0.253267	1.2434	0.530925	1.35128
642.007	0.809837	1.09479	0.257267	1.20296	0.614935	1.32459
642.507	0.691949	1.06553	0.263833	1.1597	0.695892	1.2963
643.007	0.738492	1.03564	0.27505	1.1173	0.771393	1.26636
643.507	1.03819	1.00725	0.293004	1.07946	0.83904	1.23474
644.007	1.67976	0.982453	0.319779	1.0499	0.896431	1.20138
644.507	2.75192	0.963354	0.357461	1.03232	0.941167	1.16623
645.007	3.97326	0.959747	0.383729	1.02667	0.975683	1.13618
645.507	3.47555	0.918671	0.42163	0.999997	1.03809	1.1097
646.007	3.01886	0.879922	0.44742	0.972092	1.08924	1.08234
646.507	2.60593	0.842941	0.465813	0.943694	1.12944	1.05427
647.007	2.23951	0.807169	0.481522	0.915544	1.15902	1.02564
647.507	1.92233	0.772047	0.49926	0.88838	1.17829	0.996601
648.007	1.65715	0.737015	0.523742	0.862942	1.18756	0.967317
648.507	1.4467	0.701516	0.55968	0.839969	1.18716	0.937939
649.007	1.29374	0.664991	0.611788	0.820201	1.1774	0.908622
649.507	1.20099	0.626879	0.68478	0.804378	1.15861	0.879523
650.007	1.17121	0.586622	0.783369	0.793239	1.13108	0.850795
