# Supplementary material for: Corollary discharge promotes a sustained motor state in a neural circuit for navigation
Source: eLife. 2021 Apr 21;10:e68848. doi: 10.7554/eLife.68848 (PMC8139836; doi:10.7554/eLife.68848)
Supplement: Figure 4—source data 1. [file elife-68848-fig4-data1.xlsx]

## Sheet: Fig 4-RIM ablation
Time relative to onset of a forward run (s)
-20	-19.5	-19	-18.5	-18	-17.5	-17	-16.5	-16	-15.5	-15	-14.5	-14	-13.5	-13	-12.5	-12	-11.5	-11	-10.5	-10	-9.5	-9	-8.5	-8	-7.5	-7	-6.5	-6	-5.5	-5	-4.5	-4	-3.5	-3	-2.5	-2	-1.5	-1	-0.5	0	0.5	1	1.5	2	2.5	3	3.5	4	4.5
Calcium activity in AIY (dR/R0)
0.120576	0.105133	0.0773083	0.0531288	0.0378992	0.0321866	0.031781	0.0475958	0.0580639	0.0566518	0.0591631	0.0637048	0.0814459	0.105683	0.142418	0.168079	0.188037	0.184089	0.177712	0.167061	0.151847	0.13452	0.122685	0.109942	0.0954533	0.0830575	0.0814702	0.0899152	0.108297	0.156339	0.214201	0.289668	0.337718	0.358612	0.345572	0.3188	0.259023	0.212127	0.177977	0.183403	0.202911	0.252365	0.28764	0.309961	0.303308	0.28634	0.24385	0.225811	0.230089	0.23911
0.176585	0.198594	0.234849	0.282481	0.297681	0.303899	0.292126	0.2797	0.26671	0.325085	0.403629	0.515693	0.586453	0.621486	0.606382	0.571603	0.491129	0.445395	0.429685	0.426211	0.421213	0.404444	0.369304	0.316974	0.275256	0.235315	0.200045	0.168206	0.159618	0.15145	0.143871	0.135293	0.126716	0.121154	0.113878	0.10439	0.0894327	0.0727055	0.054494	0.049386	0.0598724	0.0713467	0.0830137	0.0943052	0.0952617	0.0839286	0.0788091	0.0762244	0.079611	0.0829977
0.0607675	0.0636688	0.0666234	0.0715197	0.0955794	0.119639	0.136935	0.154038	0.165588	0.176175	0.170403	0.158636	0.169781	0.195438	0.222444	0.273933	0.325421	0.333409	0.338232	0.298365	0.248164	0.200008	0.15276	0.13101	0.128309	0.124474	0.119266	0.110761	0.0956328	0.0836488	0.0848461	0.0878563	0.114025	0.140193	0.162592	0.184802	0.179828	0.168593	0.154408	0.126085	0.0983622	0.0813917	0.0644212	0.0701208	0.0774692	0.122336	0.175843	0.212599	0.241933	0.266287
0.0991066	0.093728	0.0813748	0.0776687	0.0784462	0.0969898	0.127934	0.173986	0.26229	0.360081	0.446456	0.504234	0.529894	0.516291	0.493196	0.468183	0.44593	0.426536	0.38487	0.336648	0.278649	0.236444	0.210599	0.226224	0.257158	0.321434	0.378754	0.42942	0.434732	0.422699	0.370888	0.314625	0.254437	0.203636	0.157309	0.12252	0.0980884	0.0820831	0.0803832	0.0807946	0.0896213	0.107158	0.11726	0.127161	0.143367	0.147609	0.140428	0.13053	0.117483	0.0914972
0.458323	0.579314	0.694101	0.803753	0.888088	0.935537	0.942991	0.851087	0.756687	0.649834	0.544685	0.47393	0.403176	0.360265	0.320203	0.293027	0.26933	0.261642	0.262673	0.261872	0.259426	0.254433	0.245738	0.259031	0.326788	0.389382	0.426291	0.462744	0.483111	0.503478	0.447963	0.384705	0.340528	0.301504	0.282366	0.273137	0.262989	0.25195	0.253841	0.276145	0.324268	0.442983	0.556092	0.630942	0.705792	0.730911	0.755405	0.728583	0.693956	0.666201
0.0671275	0.0658912	0.0636418	0.0606554	0.0572696	0.0507649	0.0460019	0.0452218	0.0462692	0.0483954	0.0507857	0.0520812	0.0509071	0.0491817	0.0471305	0.0445544	0.043715	0.0468044	0.0504424	0.0543774	0.0581368	0.0612125	0.0627634	0.0609972	0.057437	0.0559923	0.0545711	0.0522316	0.0501153	0.0496555	0.0480247	0.0453513	0.0416815	0.0380244	0.035301	0.0322136	0.0287459	0.0271497	0.0259938	0.0248317	0.0247662	0.0258457	0.0265653	0.0271218	0.0271516	0.0260286	0.0236023	0.0217997	0.0201569	0.0184696
0.158555	0.183184	0.206673	0.229899	0.236837	0.236506	0.242061	0.252401	0.263118	0.274373	0.289803	0.315394	0.340986	0.36412	0.386344	0.381953	0.360574	0.326697	0.279892	0.23446	0.191348	0.15818	0.157968	0.161576	0.195466	0.229356	0.252982	0.276522	0.280483	0.281565	0.264418	0.241265	0.224221	0.211051	0.224869	0.266533	0.302002	0.316358	0.339428	0.376743	0.402031	0.393021	0.386871	0.398356	0.409879	0.423312	0.436744	0.447144	0.45713	0.456339
0.33618	0.305574	0.272604	0.248587	0.234561	0.22535	0.224976	0.227173	0.237847	0.246715	0.241338	0.23596	0.225157	0.214202	0.201187	0.187758	0.174613	0.183773	0.192933	0.188931	0.183352	0.202079	0.227952	0.25334	0.278471	0.315286	0.362337	0.423692	0.505378	0.578986	0.631083	0.682416	0.728767	0.775118	0.782111	0.788012	0.796759	0.805996	0.793547	0.773208	0.752419	0.729478	0.706351	0.677817	0.649283	0.66693	0.688956	0.674777	0.65116	0.622168
0.347995	0.373509	0.386804	0.400098	0.36868	0.307327	0.262715	0.237803	0.214425	0.194033	0.175187	0.161842	0.150003	0.151813	0.153623	0.151245	0.148779	0.14839	0.148339	0.139657	0.127936	0.214352	0.361019	0.491026	0.604333	0.701721	0.773094	0.798283	0.691886	0.588443	0.506735	0.425027	0.387641	0.350272	0.323021	0.29715	0.318013	0.355313	0.371749	0.375387	0.381026	0.388836	0.371924	0.311023	0.25478	0.213288	0.173843	0.149431	0.125018	0.115321
NaN	NaN	NaN	NaN	NaN	NaN	NaN	NaN	NaN	NaN	NaN	NaN	NaN	NaN	NaN	NaN	NaN	NaN	NaN	NaN	NaN	NaN	NaN	NaN	NaN	NaN	NaN	NaN	0.822601	0.832049	0.851039	0.879411	0.916769	0.983253	0.957285	0.870878	0.715168	0.569306	0.44021	0.316023	0.205803	0.158477	0.124721	0.101642	0.092311	0.086273	0.0851913	0.0895655	0.0958693	0.100875
0.0318644	0.0210223	0.026088	0.0311537	0.0471788	0.0635708	0.0749045	0.085186	0.0908208	0.0945409	0.0980787	0.100922	0.104217	0.112181	0.120145	0.122722	0.125122	0.111859	0.0957889	0.0986244	0.109257	0.113703	0.113817	0.122031	0.140217	0.146174	0.127101	0.109062	0.0961377	0.0832862	0.0791894	0.0750927	0.0979552	0.124197	0.172461	0.227376	0.288523	0.353048	0.393025	0.411093	0.41915	0.412718	0.394503	0.347216	0.301372	0.265314	0.229206	0.187223	0.145241	0.121806
0.0121359	0.00706042	0.00556478	0.00413557	0.00330017	0.00246477	0.00928257	0.0162534	0.0176707	0.0180334	0.0199432	0.0224528	0.0241231	0.0252353	0.034808	0.0535243	0.0722405	0.0997979	0.128331	0.172233	0.220459	0.250079	0.269278	0.275865	0.26988	0.259394	0.241585	0.23823	0.280444	0.318311	0.317479	0.316647	0.311605	0.30648	0.261646	0.2104	0.195039	0.192207	0.204396	0.226556	0.248343	0.265911	0.28348	0.283342	0.282489	0.26243	0.238746	0.213301	0.187175	0.175766
-0.0111845	-0.00265304	0.00335832	0.00605618	-0.00354998	-0.0177734	-0.0393872	-0.0449763	-0.0395031	-0.0213496	-0.00504904	0.00745627	0.0144919	0.0201349	0.0293347	0.0440118	0.0641837	0.0683322	0.0714058	0.0775695	0.0781764	0.0758376	0.0743147	0.0727918	0.0706392	0.0658192	0.061478	0.0575113	0.0636958	0.0650967	0.0558862	0.0482802	0.0418701	0.0415631	0.0402542	0.0378182	0.0515131	0.0628061	0.0587152	0.0677493	0.0846183	0.0840447	0.0845498	0.0876821	0.0867301	0.0842079	0.0817178	0.0792278	0.0796392	0.0870991
0.0607655	0.0620322	0.0693148	0.0817141	0.097798	0.107267	0.101672	0.0960774	0.0986926	0.103423	0.111018	0.119201	0.127767	0.122121	0.11268	0.0971759	0.106077	0.120648	0.124937	0.129194	0.133424	0.130028	0.123164	0.109362	0.102469	0.0985587	0.0730178	0.0511663	0.0345933	0.0396938	0.0520297	0.0719715	0.101091	0.137044	0.138182	0.132573	0.117574	0.0962153	0.0754187	0.0808916	0.0879425	0.0966176	0.105049	0.111153	0.109879	0.128171	0.159802	0.194702	0.217082	0.218474
0.0847184	0.119188	0.159682	0.201514	0.254478	0.312724	0.354333	0.382784	0.388969	0.36663	0.333548	0.275183	0.215816	0.151841	0.0899025	0.0606705	0.0314386	0.0180167	0.00599592	0.000959138	-0.00231414	-0.00558742	-0.010901	-0.016496	-0.0204723	-0.0238148	-0.0173757	-0.00438292	0.00900803	0.0228324	0.0414461	0.0686187	0.098615	0.137602	0.183263	0.278997	0.37473	0.440997	0.507223	0.530669	0.545907	0.529883	0.501642	0.471491	0.440062	0.408742	0.37916	0.349578	0.318197	0.286659
0.303506	0.341802	0.35068	0.356639	0.356665	0.353014	0.335546	0.318078	0.301518	0.37482	0.448122	0.458464	0.461025	0.442319	0.417269	0.34982	0.257491	0.184894	0.132818	0.0936457	0.0764272	0.0631101	0.0628246	0.0634709	0.0716252	0.0797796	0.0802671	0.0806802	0.0731481	0.0642184	0.0610805	0.0600826	0.062001	0.078097	0.095303	0.133338	0.171373	0.26718	0.368646	0.421045	0.460464	0.484433	0.50082	0.483224	0.437891	0.414065	0.418657	0.43156	0.46289	0.491457
0.579304	0.556524	0.521383	0.443614	0.369384	0.325314	0.281243	0.255833	0.230708	0.221169	0.214494	0.209263	0.204581	0.199791	0.194454	0.188849	0.172894	0.156938	0.147682	0.139127	0.130805	0.122547	0.116725	0.112127	0.106905	0.101163	0.0949441	0.088083	0.080838	0.0727174	0.0643872	0.0551338	0.0461588	0.0430387	0.0399186	0.041185	0.042804	0.04714	0.0521317	0.0584286	0.0653236	0.0734817	0.0827808	0.122653	0.207291	0.277568	0.311957	0.343022	0.357365	0.367284
0.269747	0.266834	0.270241	0.273672	0.306246	0.342931	0.377165	0.406107	0.427768	0.415438	0.402052	0.371129	0.340207	0.335472	0.33251	0.387907	0.458206	0.510004	0.552137	0.576085	0.583006	0.563387	0.499872	0.439781	0.389599	0.338768	0.283046	0.227323	0.20044	0.173643	0.143092	0.108741	0.0839849	0.0750846	0.068564	0.0689227	0.0693014	0.0698315	0.0703615	0.0793822	0.0884268	0.105714	0.124375	0.136796	0.146995	0.15116	0.151259	0.148508	0.142374	0.135823
0.0514851	0.0487054	0.0474828	0.0464653	0.0462718	0.046201	0.0460042	0.0456367	0.0451146	0.046752	0.0798135	0.250005	0.423091	0.598794	0.73944	0.834536	0.774045	0.699765	0.613971	0.534689	0.459707	0.397463	0.343921	0.297649	0.262948	0.233111	0.215119	0.197127	0.179959	0.166355	0.160118	0.155649	0.152154	0.147406	0.140047	0.127307	0.114659	0.102074	0.0926553	0.0847154	0.0798407	0.0770832	0.0754024	0.0759912	0.0767488	0.0778559	0.0787822	0.0796017	0.0775078	0.075102
0.15491	0.152947	0.143416	0.131096	0.11806	0.104568	0.0950863	0.0897649	0.0907187	0.103306	0.1188	0.143991	0.169876	0.201337	0.232798	0.263184	0.292259	0.318168	0.337675	0.349792	0.334274	0.319324	0.310057	0.300791	0.284585	0.268172	0.248688	0.228581	0.204773	0.179461	0.154962	0.131026	0.111938	0.0987531	0.0898726	0.0896767	0.0904135	0.0951009	0.0997884	0.117636	0.142526	0.162224	0.176966	0.19806	0.229024	0.25769	0.280191	0.299406	0.296933	0.29446
0.199728	0.181772	0.189907	0.196395	0.200084	0.205257	0.215376	0.225494	0.220883	0.19681	0.184452	0.198096	0.222296	0.305938	0.389282	0.444878	0.500474	0.540172	0.577511	0.581962	0.57551	0.567993	0.559854	0.552296	0.545296	0.522784	0.476109	0.433041	0.399671	0.365807	0.329164	0.292521	0.254838	0.216435	0.194935	0.192402	0.186754	0.174813	0.161018	0.140295	0.12448	0.173069	0.221659	0.283048	0.345096	0.432605	0.52527	0.544668	0.534342	0.521621
0.423801	0.377238	0.331483	0.309543	0.302225	0.344829	0.379192	0.401734	0.424276	0.435469	0.439328	0.408794	0.391306	0.395066	0.418182	0.446729	0.473307	0.4581	0.406721	0.369285	0.330034	0.284312	0.268617	0.264563	0.237568	0.217329	0.205223	0.198904	0.197514	0.210672	0.213072	0.20792	0.202769	0.200627	0.192177	0.15216	0.120723	0.096323	0.0871098	0.086324	0.101268	0.115117	0.127173	0.120297	0.115497	0.113182	0.117117	0.119208	0.111788	0.11768
0.0468361	0.0455387	0.0434944	0.0383785	0.0398992	0.0466683	0.0533798	0.0614989	0.0727506	0.0796033	0.0853836	0.100806	0.107687	0.104129	0.165681	0.239838	0.344354	0.483102	0.568813	0.605578	0.516619	0.400926	0.269247	0.198764	0.145671	0.122459	0.108558	0.0980151	0.0877905	0.078628	0.0704951	0.0604972	0.0527193	0.0515613	0.0583162	0.0697407	0.0719328	0.0743271	0.077067	0.0646008	0.0484356	0.040324	0.036187	0.0357603	0.0378794	0.0400538	0.0416471	0.0415565	0.0407632	0.0426197
0.15691	0.160778	0.166014	0.156857	0.147758	0.154971	0.142087	0.112879	0.124801	0.130544	0.118546	0.130523	0.14788	0.131829	0.1278	0.137037	0.146274	0.146774	0.156121	0.212409	0.235824	0.232691	0.237714	0.227064	0.176621	0.163415	0.167002	0.161156	0.157279	0.156001	0.143887	0.133952	0.143824	0.180598	0.238118	0.296076	0.380826	0.521262	0.632724	0.732155	0.831586	0.932669	0.955024	0.844658	0.662597	0.461848	0.307641	0.209385	0.168944	0.153157
0.0660042	0.0636004	0.061214	0.0612847	0.0606214	0.0590322	0.0607616	0.0634161	0.0663282	0.0693968	0.0716115	0.0730491	0.0727689	0.0713548	0.069309	0.0669658	0.0643425	0.0610364	0.0602	0.0608632	0.0619633	0.0624206	0.0613556	0.05808	0.053461	0.0489973	0.0458366	0.0456735	0.0461092	0.0468784	0.0484906	0.050136	0.0539682	0.0586534	0.065305	0.0708063	0.0750732	0.0780108	0.0805169	0.0822799	0.0857455	0.0910366	0.0962009	0.101	0.104055	0.104775	0.103184	0.0984925	0.0936967	0.0913485
0.0659985	0.064198	0.06129	0.0605325	0.059775	0.0571117	0.0555447	0.0579118	0.062563	0.0688201	0.0773981	0.0847568	0.0878522	0.086751	0.0826922	0.0751032	0.0674645	0.0604474	0.0537933	0.0473944	0.0410931	0.0356996	0.0327723	0.0309323	0.029795	0.0290517	0.0282518	0.0272366	0.0263199	0.0262229	0.0263739	0.0268313	0.0280931	0.0295785	0.03111	0.0323179	0.0331268	0.03248	0.0313659	0.0300397	0.0293284	0.0294403	0.0309438	0.0328853	0.0344088	0.036343	0.0388261	0.0430848	0.0480672	0.0543443
-0.00898995	-0.0107016	-0.0110878	-0.0113632	-0.00996903	-0.00811213	-0.00567696	-0.000263756	0.0052005	0.0118063	0.0184122	0.0177427	0.0164646	0.0478946	0.087349	0.13976	0.198178	0.304252	0.447347	0.553409	0.604611	0.640108	0.635855	0.615474	0.512395	0.410797	0.342023	0.273248	0.237302	0.204078	0.172143	0.142671	0.115653	0.0971646	0.0793168	0.0670211	0.0547254	0.0490864	0.0435598	0.156447	0.288068	0.411707	0.532592	0.630797	0.714093	0.711576	0.617426	0.520489	0.418679	0.3239
0.511291	0.424019	0.372439	0.333024	0.363888	0.44052	0.535857	0.650992	0.746522	0.808061	0.84059	0.784204	0.727818	0.641844	0.534932	0.449697	0.389343	0.340106	0.311883	0.291859	0.299914	0.317585	0.437192	0.5568	0.635046	0.711837	0.767078	0.817785	0.837368	0.844001	0.852058	0.861121	0.850835	0.818397	0.799707	0.806959	0.814211	0.829555	0.846149	0.860157	0.873075	0.82148	0.724383	0.690064	0.727567	0.767048	0.810611	0.848164	0.862633	0.866078
0.525695	0.465338	0.404982	0.3951	0.389442	0.383783	0.385199	0.389055	0.391432	0.389208	0.384221	0.359668	0.335174	0.325255	0.315336	0.307568	0.300084	0.293888	0.28809	0.279618	0.269665	0.261301	0.254381	0.290875	0.39719	0.506028	0.621892	0.732338	0.804583	0.876828	0.836809	0.782058	0.724971	0.667079	0.622252	0.585292	0.563718	0.558549	0.550938	0.539061	0.526358	0.511102	0.494181	0.46555	0.436953	0.416102	0.395251	0.399902	0.40788	0.414379
0.0910261	0.106899	0.122527	0.138082	0.164594	0.197552	0.220333	0.233318	0.241553	0.242352	0.236783	0.213944	0.193485	0.188975	0.184573	0.191076	0.197579	0.211379	0.226082	0.24358	0.262008	0.285299	0.311703	0.322217	0.31619	0.297283	0.254416	0.209415	0.157263	0.109511	0.106141	0.102772	0.120356	0.138587	0.167558	0.198422	0.199989	0.190732	0.181998	0.173599	0.165334	0.157209	0.158297	0.176464	0.190771	0.192187	0.193602	0.193764	0.191382	0.186042
0.113629	0.108496	0.113962	0.127275	0.138004	0.145371	0.152738	0.173814	0.195543	0.20256	0.206229	0.229513	0.262242	0.290876	0.315945	0.352131	0.403987	0.456018	0.508467	0.55869	0.596785	0.633901	0.644006	0.654111	0.625127	0.592513	0.567648	0.544779	0.525556	0.508092	0.496043	0.506326	0.515767	0.502126	0.488485	0.452555	0.414559	0.372346	0.329048	0.294389	0.263887	0.260954	0.281965	0.297104	0.303978	0.313399	0.328885	0.344172	0.358523	0.372926
0.0990814	0.0880344	0.0731962	0.0519906	0.0492324	0.0533134	0.0633756	0.0747169	0.087155	0.173338	0.26189	0.341391	0.401598	0.445688	0.359943	0.285748	0.227092	0.196146	0.175559	0.171068	0.166577	0.154243	0.135294	0.108258	0.0919367	0.0995895	0.103199	0.105695	0.114113	0.113754	0.103735	0.0944265	0.0905576	0.104688	0.108912	0.106743	0.105412	0.092109	0.0583573	0.0501088	0.0526737	0.0699552	0.0805415	0.0847209	0.0799074	0.0708547	0.0523111	0.0487182	0.0544766	0.0600303
0.118533	0.104666	0.0927755	0.0849669	0.0780366	0.0721859	0.0673437	0.0634095	0.0593576	0.0554874	0.0523868	0.0503213	0.0491877	0.0462416	0.0433711	0.0422683	0.0411655	0.0394963	0.0374277	0.0352069	0.0326184	0.0290505	0.0257536	0.0226327	0.0226465	0.0233739	0.025379	0.0275144	0.0297417	0.0299606	0.0297596	0.0289084	0.0282926	0.0278427	0.0301856	0.0327002	0.0348598	0.0379723	0.0417568	0.0429941	0.0440296	0.0467796	0.050061	0.0496642	0.0493431	0.0491526	0.04732	0.0448864	0.0477793	0.0502226
0.222393	0.200325	0.181048	0.166571	0.146626	0.122452	0.105387	0.0929356	0.0890822	0.0919882	0.0982872	0.110701	0.132388	0.165906	0.190222	0.20842	0.21008	0.199002	0.178737	0.158472	0.1235	0.0921984	0.0767997	0.0684352	0.0642313	0.0698348	0.0731104	0.0733128	0.0750753	0.0746329	0.0610027	0.0499163	0.0410427	0.0441475	0.0503315	0.0609308	0.0740765	0.0876862	0.0912925	0.131266	0.214626	0.284836	0.35188	0.418284	0.480181	0.478228	0.41498	0.327759	0.251207	0.211985
0.096626	0.0966824	0.094281	0.0967678	0.101368	0.106769	0.11217	0.118322	0.123214	0.120637	0.114632	0.1052	0.0929731	0.0807121	0.0714874	0.0652257	0.0619245	0.0629888	0.0649588	0.0672775	0.0696202	0.071987	0.0726555	0.0731914	0.0745897	0.0747121	0.0736585	0.073295	0.0730457	0.072805	0.0725643	0.0728179	0.0736939	0.0759965	0.0757229	0.0740039	0.075989	0.0766732	0.0744462	0.0740385	0.0745664	0.0736228	0.0729257	0.0728128	0.0735318	0.0746765	0.0739572	0.0737002	0.0743381	0.0732752
0.0390695	0.0398769	0.0417959	0.0448114	0.0464326	0.0472761	0.0456754	0.0438405	0.0417746	0.0416445	0.0424783	0.0461196	0.0491394	0.0515464	0.0523656	0.0525497	0.0512186	0.0501175	0.0492433	0.0484653	0.0473748	0.0448172	0.0426421	0.0408438	0.0376977	0.0347099	0.033535	0.0323296	0.0310964	0.0326616	0.0345146	0.0356903	0.0369779	0.0383672	0.038982	0.0392186	0.0383211	0.0370036	0.0353045	0.0352087	0.0360879	0.0401696	0.0439668	0.047484	0.0512686	0.0549756	0.05812	0.0617353	0.0658147	0.0702295
0.0499854	0.0445335	0.0437025	0.0471884	0.0529265	0.0638868	0.0785798	0.0956815	0.100326	0.105725	0.113351	0.121081	0.127566	0.12543	0.124985	0.126129	0.114975	0.106629	0.108539	0.11243	0.116653	0.104212	0.0924483	0.0816529	0.0758111	0.0713895	0.0761367	0.0845201	0.0857606	0.0877545	0.0907268	0.102311	0.116743	0.134527	0.135085	0.123593	0.104324	0.0897764	0.0848033	0.0882964	0.0943017	0.0916509	0.0848233	0.0735746	0.0637904	0.0571491	0.0588455	0.0611876	0.0639063	0.0680664
0.117134	0.106794	0.121023	0.129435	0.134791	0.132053	0.125213	0.113597	0.111166	0.111287	0.114426	0.11696	0.119193	0.158595	0.188227	0.201627	0.199511	0.188158	0.14076	0.111428	0.101543	0.113891	0.129468	0.144388	0.149683	0.14946	0.136776	0.120211	0.0975386	0.0922923	0.0931101	0.0974895	0.0979329	0.0946098	0.0968079	0.102222	0.114046	0.132881	0.154509	0.16146	0.158588	0.143152	0.136544	0.131384	0.124284	0.117796	0.111808	0.0968242	0.0825853	0.0714863
0.062903	0.0651543	0.0669064	0.068537	0.0720177	0.0760496	0.0810665	0.0844709	0.086961	0.0840188	0.0792825	0.0713347	0.0642217	0.0576491	0.0555072	0.0546209	0.0559784	0.0556554	0.0546309	0.0541916	0.0534576	0.0522397	0.0529581	0.0543013	0.0523776	0.0505365	0.0488307	0.0486089	0.0489842	0.0497835	0.0500464	0.0494311	0.0477572	0.0458674	0.0471145	0.04833	0.049498	0.0487157	0.0471305	0.044899	0.0439299	0.0448622	0.0474917	0.0508113	0.0545647	0.056585	0.0559967	0.055654	0.0553734	0.0548098
0.383285	0.381975	0.387571	0.405844	0.421213	0.426997	0.431965	0.430516	0.429067	0.411814	0.394443	0.380846	0.3679	0.361886	0.358401	0.353628	0.341725	0.329802	0.31729	0.304778	0.283608	0.261402	0.253451	0.249686	0.275503	0.317054	0.374015	0.444466	0.514673	0.584533	0.640547	0.663184	0.680165	0.670103	0.659926	0.646376	0.632826	0.633151	0.634792	0.643316	0.653857	0.650491	0.639742	0.608611	0.55965	0.505682	0.444607	0.386128	0.333896	0.288949
0.166406	0.169085	0.171788	0.174491	0.171343	0.164712	0.18317	0.226083	0.260345	0.280881	0.301539	0.32253	0.335963	0.297153	0.258344	0.236635	0.215153	0.203852	0.194116	0.172513	0.146446	0.125933	0.109019	0.0941462	0.081424	0.0704597	0.0625299	0.0546001	0.0498397	0.0458392	0.0414728	0.0369397	0.0428448	0.0567149	0.0793188	0.112719	0.15536	0.220957	0.276552	0.2824	0.288445	0.298432	0.308419	0.295292	0.279807	0.289576	0.306162	0.309105	0.305253	0.310777
0.11735	0.110877	0.106229	0.10541	0.100295	0.093361	0.0902023	0.0911295	0.0972864	0.181353	0.272435	0.324911	0.374628	0.42246	0.447373	0.480323	0.529779	0.565749	0.586706	0.522333	0.45338	0.379654	0.323062	0.267918	0.210157	0.170152	0.140717	0.134709	0.130625	0.12916	0.127033	0.124717	0.119176	0.10535	0.0998256	0.0990814	0.0880344	0.0731962	0.0519906	0.0492324	0.0533134	0.0633756	0.0747169	0.087155	0.173338	0.26189	0.341391	0.401598	0.445688	0.359943
0.0409349	0.0500448	0.0543329	0.0532316	0.0514651	0.0474032	0.0366511	0.0362019	0.0421535	0.0600581	0.0828937	0.113594	0.200788	0.300976	0.363659	0.387312	0.373193	0.306831	0.236174	0.1704	0.138075	0.122836	0.108233	0.0968685	0.0906552	0.0787863	0.0664787	0.0629693	0.0648588	0.0716136	0.066182	0.0596584	0.0532754	0.0454818	0.0372746	0.0371931	0.038135	0.0405904	0.043479	0.0463515	0.0486119	0.052291	0.0570622	0.0540599	0.0528365	0.0562279	0.0575457	0.0580601	0.0613939	0.061619
0.671031	0.572868	0.495158	0.417448	0.365606	0.31527	0.295433	0.282064	0.272426	0.264349	0.248734	0.227766	0.207017	0.186519	0.167814	0.152512	0.141481	0.14516	0.148553	0.149517	0.15048	0.164139	0.177986	0.196599	0.215953	0.338311	0.499739	0.639385	0.764821	0.845576	0.878963	0.912349	0.856375	0.719746	0.597757	0.497222	0.435112	0.479246	0.520621	0.545779	0.570846	0.579242	0.587638	0.511291	0.424019	0.372439	0.333024	0.363888	0.44052	0.535857
0.44631	0.397761	0.354169	0.314826	0.318024	0.329908	0.355116	0.390172	0.427421	0.447691	0.46796	0.490936	0.501723	0.47192	0.44143	0.410433	0.419424	0.436661	0.467094	0.475962	0.470113	0.451167	0.433013	0.419358	0.425718	0.444619	0.419601	0.384743	0.331299	0.272536	0.210715	0.190884	0.17668	0.171181	0.16111	0.148406	0.129613	0.114507	0.107761	0.112067	0.122194	0.130562	0.141958	0.159378	0.169935	0.177044	0.175187	0.170345	0.159583	0.16703
0.113941	0.0986879	0.103307	0.115518	0.125498	0.128553	0.132406	0.143217	0.154027	0.143056	0.131726	0.124834	0.118642	0.114579	0.111251	0.127449	0.155423	0.190136	0.231483	0.265022	0.286023	0.306423	0.325143	0.342621	0.352688	0.362725	0.364852	0.36698	0.375742	0.385374	0.372235	0.351261	0.325793	0.29738	0.265647	0.230366	0.207055	0.204801	0.207733	0.226696	0.250209	0.305747	0.361239	0.406503	0.451767	0.468453	0.481403	0.450021	0.404974	0.367058
0.10364	0.0994863	0.088121	0.0725435	0.0795945	0.0963707	0.128243	0.141249	0.149544	0.160766	0.16241	0.155317	0.15458	0.148878	0.129919	0.113316	0.0981365	0.0871567	0.0837917	0.0905539	0.0928945	0.0935339	0.09129	0.0906516	0.0912593	0.082516	0.0749662	0.0708348	0.0605627	0.0497122	0.0646	0.0789426	0.0925938	0.11549	0.134998	0.13278	0.134966	0.140229	0.117134	0.106794	0.121023	0.129435	0.134791	0.132053	0.125213	0.113597	0.111166	0.111287	0.114426	0.11696
0.047484	0.0512686	0.0549756	0.05812	0.0617353	0.0658147	0.0702295	0.0745134	0.0778162	0.0807062	0.0831902	0.0850066	0.087442	0.0937574	0.101276	0.109979	0.1208	0.134061	0.157422	0.179554	0.200477	0.211612	0.216502	0.201782	0.185255	0.167091	0.150834	0.13534	0.121648	0.109471	0.0985625	0.0886557	0.0800758	0.0761431	0.0716762	0.0667628	0.0629441	0.0591416	0.0549009	0.0514851	0.0487054	0.0474828	0.0464653	0.0462718	0.046201	0.0460042	0.0456367	0.0451146	0.046752	0.0798135
0.519002	0.486685	0.454068	0.42107	0.393791	0.378666	0.358665	0.319182	0.279219	0.233744	0.18827	0.157685	0.127718	0.121511	0.119822	0.121282	0.123966	0.115314	0.0984679	0.0808012	0.0621736	0.0492869	0.0475144	0.0500392	0.0697107	0.0893907	0.109168	0.128946	0.157164	0.185727	0.211446	0.236543	0.25951	0.281567	0.285983	0.276561	0.274907	0.283113	0.283361	0.266726	0.249323	0.228863	0.206501	0.16257	0.118639	0.108842	0.100431	0.0920193	0.0776427	0.0613927
0.0275879	0.0191592	0.0124956	0.00410219	-0.00510167	-0.0107261	-0.0148788	-0.0167471	-0.0123684	-0.006068	-0.000258189	0.00638301	0.0138313	0.0173315	0.0202695	0.0229449	0.0256203	0.0270035	0.0273105	0.022726	0.0208851	0.0260871	0.0292043	0.0313913	0.0345853	0.0336134	0.0263245	0.0264076	0.0289703	0.0324734	0.0358646	0.0391578	0.0314605	0.0305722	0.0470569	0.0607692	0.0729806	0.0823904	0.0830451	0.0727541	0.062463	0.0550819	0.0485557	0.0410213	0.0342974	0.0283579	0.0259872	0.0261521	0.0330631	0.0391857
0.204906	0.199989	0.18875	0.167437	0.156586	0.153776	0.170808	0.183784	0.187045	0.1807	0.171123	0.163995	0.152888	0.137744	0.119642	0.101178	0.0830718	0.0667363	0.0516502	0.0619075	0.0728734	0.0924932	0.13614	0.181443	0.225937	0.227889	0.227051	0.222067	0.229161	0.241541	0.263655	0.275574	0.278815	0.266998	0.255102	0.245562	0.223509	0.197879	0.203113	0.214477	0.233336	0.264964	0.288876	0.272228	0.253579	0.233525	0.22439	0.217404	0.213699	0.215652
0.55505	0.442725	0.338809	0.23875	0.223563	0.208375	0.206214	0.205344	0.190345	0.171581	0.170965	0.180207	0.19015	0.200774	0.206647	0.203683	0.197636	0.181254	0.164282	0.142519	0.120756	0.117248	0.114305	0.128228	0.145606	0.167557	0.191374	0.239125	0.303506	0.341802	0.35068	0.356639	0.356665	0.353014	0.335546	0.318078	0.301518	0.37482	0.448122	0.458464	0.461025	0.442319	0.417269	0.34982	0.257491	0.184894	0.132818	0.0936457	0.0764272	0.0631101
0	NaN	0.899312	0.763942	0.628295	0.49237	0.381836	0.323232	0.378918	0.434603	0.527365	0.670002	0.763138	0.819511	0.777213	0.701241	0.598117	0.519897	0.438681	0.347168	0.290015	0.250681	0.233658	0.222143	0.217424	0.210675	0.206734	0.21434	0.221946	0.229496	0.23698	0.23186	0.219562	0.19066	0.185704	0.196486	0.235087	0.292165	0.379376	0.439903	0.489025	0.518454	0.511221	0.469982	0.423801	0.377238	0.331483	0.309543	0.302225	0.344829
0.205347	0.181205	0.160712	0.14249	0.128979	0.115387	0.101753	0.098723	0.0980141	0.101777	0.1067	0.112227	0.112399	0.110512	0.104608	0.102391	0.102101	0.110011	0.126904	0.159155	0.193817	0.222984	0.238824	0.240065	0.21808	0.190585	0.165597	0.145257	0.130438	0.125221	0.1229	0.123425	0.123187	0.122115	0.119745	0.116839	0.11238	0.106286	0.0983987	0.0927297	0.0875561	0.0845543	0.0826502	0.0843694	0.0862499	0.0884203	0.0880912	0.0868034	0.0887384	0.0899895
0.152954	0.20285	0.229775	0.271261	0.358651	0.469299	0.589609	0.61941	0.602811	0.516669	0.37695	0.234952	0.171682	0.122645	0.0857627	0.0852733	0.0960492	0.125275	0.147544	0.16635	0.180427	0.187397	0.183781	0.165841	0.155894	0.201601	0.250528	0.30199	0.344828	0.363811	0.335505	0.337188	0.34781	0.333203	0.307661	0.270602	0.25082	0.242713	0.262758	0.257332	0.236415	0.19627	0.156125	0.112322	0.0650928	0.0523166	0.0484644	0.0595337	0.073543	0.0896165
0.0735318	0.0746765	0.0739572	0.0737002	0.0743381	0.0732752	0.071341	0.0720756	0.0732553	0.075296	0.0773387	0.0793893	0.0805545	0.0809678	0.080197	0.0799336	0.0823849	0.0838	0.0843359	0.0845177	0.0845976	0.0844648	0.0845713	0.0848978	0.0826706	0.0796221	0.0749466	0.0708045	0.0671149	0.0649631	0.0629449	0.0604067	0.0574942	0.0542381	0.0518427	0.0502955	0.0518424	0.0555932	0.061367	0.0662749	0.0706577	0.0734089	0.0743214	0.0735463	0.0730984	0.0726897	0.072228	0.0730021	0.0748248	0.0842138
0.0753535	0.0843312	0.0895179	0.0870638	0.0773001	0.0635891	0.0595342	0.0603253	0.0680728	0.071046	0.073146	0.0767759	0.0814547	0.0869898	0.0938327	0.0945518	0.0810178	0.0682558	0.0568825	0.0575312	0.0607816	0.0669684	0.0772716	0.0864312	0.089997	0.0988365	0.110705	0.123596	0.164052	0.192744	0.204906	0.199989	0.18875	0.167437	0.156586	0.153776	0.170808	0.183784	0.187045	0.1807	0.171123	0.163995	0.152888	0.137744	0.119642	0.101178	0.0830718	0.0667363	0.0516502	0.0619075
0.368834	0.302372	0.220139	0.136531	0.0961263	0.0665898	0.0578214	0.0588263	0.0669986	0.0807978	0.0986527	0.121669	0.140498	0.150436	0.158717	0.160378	0.162477	0.169605	0.176732	0.182108	0.187374	0.193205	0.19916	0.202034	0.20346	0.198817	0.18858	0.178342	0.167241	0.155804	0.148743	0.144591	0.141338	0.139056	0.136531	0.133532	0.126739	0.106556	0.086702	0.0705886	0.0544753	0.0494153	0.0448063	0.0395093	0.0340619	0.0370096	0.0435416	0.0448619	0.0424239	0.0414546
0.0417754	0.0407626	0.046257	0.0508157	0.0549821	0.0591986	0.0598502	0.0566058	0.0620654	0.0706106	0.0841548	0.0884282	0.0869127	0.0857874	0.0846647	0.080999	0.0695893	0.0707854	0.0797274	0.0776302	0.0766289	0.0774799	0.075546	0.0728364	0.0720336	0.0668434	0.0568467	0.0504343	0.0470483	0.0510083	0.057314	0.0650093	0.064735	0.0633489	0.0601252	0.0597399	0.0607406	0.0649285	0.0691163	0.0700634	0.0668624	0.057214	0.0454104	0.0307	0.0228837	0.0200966	0.0215724	0.0246091	0.0302631	0.0358784
0.0600303	0.0648285	0.0684318	0.0738848	0.0798886	0.0858663	0.0904089	0.0936718	0.0892386	0.0810785	0.0658951	0.0814151	0.110855	0.119287	0.124478	0.125555	0.101245	0.0762126	0.0687926	0.0613725	0.0748	0.097444	0.0979172	0.105773	0.12365	0.10455	0.0803912	0.0723531	0.0617955	0.0493061	0.0663243	0.0842649	0.100078	0.106159	0.107602	0.104271	0.0997611	0.0938652	0.0851478	0.0770754	0.0727212	0.0769536	0.0864597	0.10209	0.108395	0.100654	0.0915644	0.0822837	0.0743668	0.0723325
0.0862499	0.0884203	0.0880912	0.0868034	0.0887384	0.0899895	0.0901123	0.0890289	0.0874315	0.0851849	0.0816877	0.0761293	0.0704303	0.0647082	0.0595129	0.0576637	0.0608842	0.0630217	0.0647175	0.0657427	0.0667679	0.064303	0.0612084	0.057882	0.0551897	0.0530881	0.0509815	0.0493239	0.0497478	0.0506654	0.0520426	0.0556164	0.0596267	0.0636916	0.0672586	0.0703623	0.075078	0.0925502	0.160609	0.264274	0.398516	0.478076	0.530964	0.515484	0.500004	0.39771	0.304704	0.242498	0.196225	0.158984
0.0767482	0.0794505	0.0855339	0.0922707	0.100113	0.112391	0.127676	0.151351	0.17236	0.184854	0.192184	0.196014	0.186844	0.177056	0.167979	0.157552	0.146285	0.138591	0.132683	0.130813	0.129108	0.128444	0.123724	0.114542	0.1082	0.102839	0.0993257	0.0980612	0.09908	0.0959206	0.0916592	0.0865225	0.0818076	0.0775206	0.0776037	0.0783165	0.0779724	0.203257	0.455993	0.669545	0.862888	0.997705	0.9953	0.864388	0.72668	0.57284	0.463102	0.378802	0.32378	0.274167
0.0718072	0.0762395	0.0804814	0.0843094	0.0877036	0.0891192	0.0901449	0.0912694	0.0916655	0.0913566	0.0904426	0.0888637	0.0846218	0.0800566	0.0751788	0.0689034	0.0625365	0.0569508	0.0538482	0.0531464	0.0550943	0.0574372	0.0594419	0.062686	0.0671275	0.0658912	0.0636418	0.0606554	0.0572696	0.0507649	0.0460019	0.0452218	0.0462692	0.0483954	0.0507857	0.0520812	0.0509071	0.0491817	0.0471305	0.0445544	0.043715	0.0468044	0.0504424	0.0543774	0.0581368	0.0612125	0.0627634	0.0609972	0.057437	0.0559923
0.283331	0.276419	0.266427	0.277593	0.299019	0.322844	0.348604	0.374364	0.411432	0.456243	0.477855	0.4737	0.4808	0.508474	0.542944	0.605654	0.66915	0.742504	0.815858	0.845159	0.870304	0.887825	0.90312	0.889876	0.861546	0.812566	0.745566	0.668606	0.57756	0.500717	0.45798	0.415243	0.421695	0.445936	0.462588	0.474478	0.476207	0.46667	0.441594	0.38816	0.333822	0.276177	0.221492	0.195136	0.168781	0.145964	0.123396	0.118436	0.117484	0.113629
0.148002	0.152263	0.15626	0.160156	0.161454	0.16104	0.176125	0.207802	0.237886	0.265172	0.285764	0.283082	0.277531	0.247098	0.216665	0.251538	0.288893	0.362251	0.443341	0.500497	0.546555	0.577597	0.531757	0.487183	0.470513	0.453842	0.461107	0.471532	0.510267	0.557767	0.550752	0.51086	0.465768	0.415128	0.375701	0.355901	0.336311	0.317379	0.302071	0.318066	0.334061	0.357077	0.380357	0.413737	0.448986	0.475135	0.483912	0.489218	0.482486	0.478028
0.266106	0.229612	0.159593	0.114871	0.0789303	0.0583898	0.0482321	0.0447069	0.0502843	0.0526207	0.0497141	0.0467504	0.0439585	0.042366	0.0416064	0.0416212	0.0404795	0.0385893	0.0350666	0.0333093	0.0324373	0.0313769	0.0291401	0.0277383	0.0271087	0.0302791	0.0317827	0.0283875	0.0267087	0.0253617	0.0177345	0.0144319	0.0163095	0.0187511	0.0220251	0.0283323	0.0263136	0.0172878	0.0188747	0.0214992	0.0246119	0.0318971	0.0409349	0.0500448	0.0543329	0.0532316	0.0514651	0.0474032	0.0366511	0.0362019
0.290828	0.312818	0.360368	0.407918	0.459504	0.511865	0.582963	0.661377	0.730866	0.794386	0.860688	0.930013	0.972309	0.962042	0.934062	0.843138	0.749726	0.627386	0.505046	0.403918	0.304159	0.247743	0.200881	0.177263	0.163617	0.159748	0.162983	0.166218	0.184089	0.201967	0.21299	0.223076	0.23035	0.236733	0.265682	0.307336	0.36002	0.422895	0.49893	0.594723	0.672951	0.705928	0.734203	0.733549	0.732895	0.711221	0.689547	0.655306	0.619015	0.58493
0.0315704	0.0365982	0.0504767	0.0634702	0.0839448	0.141994	0.198548	0.253662	0.320048	0.407426	0.463386	0.504672	0.499644	0.479166	0.429945	0.340459	0.234236	0.174043	0.119844	0.0758886	0.0626219	0.0619803	0.0630942	0.0644075	0.0660609	0.06723	0.0684402	0.0742395	0.0831501	0.0969312	0.109083	0.120632	0.135773	0.154374	0.186388	0.219348	0.246208	0.267529	0.283524	0.272543	0.258071	0.249046	0.261787	0.295456	0.348665	0.408086	0.479268	0.545038	0.60601	0.614062
0.265543	0.241348	0.22154	0.203453	0.186198	0.169501	0.160871	0.161771	0.157338	0.141497	0.127763	0.122531	0.117475	0.11525	0.113026	0.123832	0.135491	0.145553	0.155213	0.17075	0.190229	0.199348	0.197197	0.19966	0.210367	0.217354	0.212452	0.208473	0.21289	0.217307	0.207863	0.19812	0.214985	0.236956	0.250305	0.259938	0.267334	0.273105	0.280821	0.290828	0.312818	0.360368	0.407918	0.459504	0.511865	0.582963	0.661377	0.730866	0.794386	0.860688
0.229015	0.236549	0.225683	0.205948	0.1805	0.157085	0.138153	0.134	0.137667	0.16169	0.184988	0.206617	0.209483	0.20333	0.189985	0.179457	0.174581	0.176653	0.182066	0.178911	0.173821	0.164976	0.177007	0.199477	0.248141	0.296398	0.343919	0.359325	0.359038	0.341366	0.32394	0.30696	0.288962	0.270317	0.241384	0.213497	0.187504	0.182949	0.18735	0.180506	0.173029	0.164403	0.147362	0.127134	0.120233	0.111521	0.0995315	0.0997178	0.105453	0.117355
0.0471526	0.048044	0.051969	0.0556927	0.0551726	0.0552443	0.0564495	0.0654049	0.0763932	0.0765749	0.0771356	0.0781063	0.065027	0.052457	0.0517786	0.0499916	0.0473696	0.0446826	0.0366514	0.0275525	0.0167708	0.00647652	-0.00231745	-0.000897809	0.0033072	0.0103675	0.018804	0.0276149	0.0369385	0.0414244	0.0426313	0.0354603	0.0262609	0.0138174	0.00960865	0.0120811	0.0455608	0.0857609	0.132866	0.155979	0.175654	0.195881	0.193118	0.175347	0.146346	0.124757	0.117439	0.146338	0.184124	0.187592
0.0650093	0.064735	0.0633489	0.0601252	0.0597399	0.0607406	0.0649285	0.0691163	0.0700634	0.0668624	0.057214	0.0454104	0.0307	0.0228837	0.0200966	0.0215724	0.0246091	0.0302631	0.0358784	0.0415301	0.0477509	0.0498964	0.0474796	0.048288	0.0486988	0.0454598	0.0508567	0.0623549	0.0590586	0.0560889	0.0551583	0.0484717	0.0400575	0.036197	0.0310927	0.0246999	0.021156	0.0219863	0.035207	0.0442597	0.0508603	0.0578448	0.0621544	0.0621254	0.0682824	0.0764997	0.085389	0.0931087	0.0997853	0.0997163
0.0776427	0.0613927	0.0630033	0.0755143	0.0884744	0.101919	0.122115	0.154251	0.181405	0.192883	0.204542	0.217811	0.231079	0.23307	0.234845	0.228236	0.220272	0.210154	0.199205	0.184328	0.166384	0.151337	0.139956	0.128575	0.117465	0.106386	0.109406	0.116372	0.134204	0.157599	0.184165	0.213887	0.23669	0.247264	0.263122	0.299904	0.336159	0.366488	0.396818	0.459755	0.523986	0.532544	0.529029	0.526624	0.524691	0.496861	0.450418	0.444467	0.485669	0.539164
0.047746	0.0565761	0.0752833	0.0898151	0.101877	0.107247	0.106419	0.0995262	0.0954734	0.0926117	0.0920127	0.0934502	0.0959018	0.0948929	0.0939978	0.0932728	0.0925477	0.0896029	0.0831963	0.0698607	0.0595136	0.0509199	0.0482825	0.0471526	0.048044	0.051969	0.0556927	0.0551726	0.0552443	0.0564495	0.0654049	0.0763932	0.0765749	0.0771356	0.0781063	0.065027	0.052457	0.0517786	0.0499916	0.0473696	0.0446826	0.0366514	0.0275525	0.0167708	0.00647652	-0.00231745	-0.000897809	0.0033072	0.0103675	0.018804
0.0471305	0.044899	0.0439299	0.0448622	0.0474917	0.0508113	0.0545647	0.056585	0.0559967	0.055654	0.0553734	0.0548098	0.0551786	0.0569508	0.0566867	0.0555722	0.0529231	0.0508418	0.0496142	0.0497465	0.0504918	0.0527904	0.053749	0.0526942	0.0526442	0.0528915	0.0516531	0.0524055	0.0561491	0.059315	0.0622777	0.0650116	0.0676167	0.0654814	0.0622521	0.0569037	0.0524029	0.0483397	0.0457988	0.0437718	0.0427436	0.0443545	0.0473069	0.055136	0.0650141	0.0785379	0.0878298	0.0951872	0.096626	0.0966824
0.529029	0.526624	0.524691	0.496861	0.450418	0.444467	0.485669	0.539164	0.616331	0.692302	0.764074	0.832496	0.863416	0.894336	0.865579	0.834478	0.753155	0.660971	0.55505	0.442725	0.338809	0.23875	0.223563	0.208375	0.206214	0.205344	0.190345	0.171581	0.170965	0.180207	0.19015	0.200774	0.206647	0.203683	0.197636	0.181254	0.164282	0.142519	0.120756	0.117248	0.114305	0.128228	0.145606	0.167557	0.191374	0.239125	0.303506	0.341802	0.35068	0.356639
0.126669	0.134079	0.175123	0.216646	0.266894	0.31898	0.353483	0.379145	0.37521	0.34456	0.311345	0.274385	0.244217	0.230988	0.21971	0.219815	0.21981	0.215689	0.211568	0.209982	0.208659	0.194356	0.176097	0.167275	0.164082	0.16374	0.166406	0.169085	0.171788	0.174491	0.171343	0.164712	0.18317	0.226083	0.260345	0.280881	0.301539	0.32253	0.335963	0.297153	0.258344	0.236635	0.215153	0.203852	0.194116	0.172513	0.146446	0.125933	0.109019	0.0941462
0.0430934	0.043152	0.0417496	0.0437644	0.0465394	0.0501674	0.055717	0.0617176	0.0534211	0.0483167	0.0477872	0.0543069	0.0624185	0.0696976	0.0778524	0.086726	0.084378	0.0808479	0.0765551	0.0597338	0.0378273	0.0181031	0.00664105	0.00447363	0.0134786	0.0226374	0.0261675	0.0296976	0.0334112	0.0351532	0.0287883	0.0241089	0.0206886	0.0169936	0.016448	0.02198	0.022548	0.0211416	0.0202573	0.0167305	0.0103386	0.0140242	0.018906	0.0228009	0.0192689	0.0123527	0.0431926	0.0651873	0.0724904	0.0855652
0.0728155	0.0633037	0.0549413	0.04789	0.045996	0.0452705	0.0454869	0.0439333	0.0413384	0.0465442	0.0493969	0.0479632	0.0495177	0.0515317	0.0472764	0.0434413	0.0400524	0.0339252	0.0294209	0.0306912	0.033253	0.0366474	0.0438662	0.0477126	0.0468361	0.0455387	0.0434944	0.0383785	0.0398992	0.0466683	0.0533798	0.0614989	0.0727506	0.0796033	0.0853836	0.100806	0.107687	0.104129	0.165681	0.239838	0.344354	0.483102	0.568813	0.605578	0.516619	0.400926	0.269247	0.198764	0.145671	0.122459
0.283451	0.288492	0.266857	0.237327	0.216408	0.200085	0.192539	0.192719	0.196201	0.204398	0.211934	0.217867	0.2238	0.225459	0.22417	0.221953	0.218614	0.217155	0.219839	0.221314	0.216977	0.212924	0.231784	0.250644	0.256699	0.261204	0.286063	0.317643	0.351555	0.386824	0.415429	0.437686	0.453475	0.458352	0.454194	0.420194	0.389956	0.389613	0.38927	0.395389	0.40169	0.394687	0.38538	0.363349	0.33618	0.305574	0.272604	0.248587	0.234561	0.22535
0.0705886	0.0544753	0.0494153	0.0448063	0.0395093	0.0340619	0.0370096	0.0435416	0.0448619	0.0424239	0.0414546	0.0422039	0.0429533	0.0386969	0.0334942	0.0264276	0.018566	0.0154416	0.0157363	0.0234423	0.0405348	0.0576846	0.0749552	0.0898503	0.0923297	0.0938209	0.0722008	0.0505807	0.0383277	0.0268783	0.0304235	0.037694	0.0657761	0.104513	0.129935	0.144079	0.158211	0.161349	0.164487	0.164173	0.163393	0.172547	0.184809	0.188318	0.186936	0.172948	0.147397	0.118631	0.0850672	0.0579275
0.164462	0.161586	0.161666	0.162485	0.166306	0.153894	0.129976	0.135016	0.138031	0.134088	0.174996	0.233742	0.253578	0.265986	0.268869	0.223834	0.173048	0.142358	0.125022	0.11735	0.110877	0.106229	0.10541	0.100295	0.093361	0.0902023	0.0911295	0.0972864	0.181353	0.272435	0.324911	0.374628	0.42246	0.447373	0.480323	0.529779	0.565749	0.586706	0.522333	0.45338	0.379654	0.323062	0.267918	0.210157	0.170152	0.140717	0.134709	0.130625	0.12916	0.127033
0.112843	0.10639	0.102672	0.0987678	0.0950393	0.0916554	0.0862258	0.0798254	0.074021	0.0691212	0.0659866	0.0648348	0.0645787	0.0619863	0.0597804	0.0582663	0.0576673	0.0575776	0.0603363	0.062903	0.0651543	0.0669064	0.068537	0.0720177	0.0760496	0.0810665	0.0844709	0.086961	0.0840188	0.0792825	0.0713347	0.0642217	0.0576491	0.0555072	0.0546209	0.0559784	0.0556554	0.0546309	0.0541916	0.0534576	0.0522397	0.0529581	0.0543013	0.0523776	0.0505365	0.0488307	0.0486089	0.0489842	0.0497835	0.0500464
0.0666969	0.061686	0.056554	0.05119	0.0477212	0.0452167	0.0427928	0.0413215	0.0416736	0.0410182	0.0398761	0.0379095	0.0360543	0.0344126	0.0328828	0.032024	0.0318994	0.0325595	0.0348233	0.0373918	0.0397266	0.0410036	0.04115	0.0400658	0.0390695	0.0398769	0.0417959	0.0448114	0.0464326	0.0472761	0.0456754	0.0438405	0.0417746	0.0416445	0.0424783	0.0461196	0.0491394	0.0515464	0.0523656	0.0525497	0.0512186	0.0501175	0.0492433	0.0484653	0.0473748	0.0448172	0.0426421	0.0408438	0.0376977	0.0347099
0.0572898	0.0591181	0.0678816	0.0842613	0.0875652	0.0883759	0.0886137	0.0800657	0.0654727	0.0525425	0.0424818	0.0375365	0.0446779	0.0560323	0.0667556	0.0834408	0.105896	0.10652	0.10364	0.0994863	0.088121	0.0725435	0.0795945	0.0963707	0.128243	0.141249	0.149544	0.160766	0.16241	0.155317	0.15458	0.148878	0.129919	0.113316	0.0981365	0.0871567	0.0837917	0.0905539	0.0928945	0.0935339	0.09129	0.0906516	0.0912593	0.082516	0.0749662	0.0708348	0.0605627	0.0497122	0.0646	0.0789426
0.134514	0.11405	0.0952968	0.0794004	0.0687792	0.0610882	0.0607799	0.0620848	0.064841	0.0693088	0.0733628	0.07596	0.0785572	0.0759018	0.0714152	0.0638395	0.0558053	0.0481555	0.050418	0.0551456	0.0630106	0.0599477	0.0560679	0.0591717	0.0596148	0.0581121	0.0708574	0.0841684	0.0976253	0.110764	0.123988	0.138992	0.169582	0.216187	0.263374	0.323481	0.42033	0.447892	0.43462	0.415209	0.367367	0.271652	0.252605	0.256042	0.247966	0.306589	0.425125	0.531016	0.636666	0.745099
0.0779559	0.0953082	0.123539	0.152608	0.182989	0.213682	0.243542	0.272989	0.286084	0.284584	0.276832	0.260025	0.24552	0.236689	0.226122	0.206985	0.188018	0.174784	0.161549	0.137846	0.104799	0.079994	0.0671092	0.0552198	0.0457819	0.0368902	0.0306878	0.0247569	0.0241177	0.0234785	0.0261609	0.0292589	0.0310606	0.0324724	0.0345274	0.0369304	0.0492913	0.0712654	0.101818	0.145857	0.192365	0.24558	0.298796	0.343895	0.385977	0.419155	0.446616	0.451121	0.429657	0.39652
0.305253	0.310777	0.324045	0.337313	0.318731	0.299074	0.266359	0.231292	0.189596	0.145415	0.120603	0.108299	0.0958965	0.0833896	0.0707653	0.0579391	0.0450291	0.0318644	0.0210223	0.026088	0.0311537	0.0471788	0.0635708	0.0749045	0.085186	0.0908208	0.0945409	0.0980787	0.100922	0.104217	0.112181	0.120145	0.122722	0.125122	0.111859	0.0957889	0.0986244	0.109257	0.113703	0.113817	0.122031	0.140217	0.146174	0.127101	0.109062	0.0961377	0.0832862	0.0791894	0.0750927	0.0979552
0.419155	0.446616	0.451121	0.429657	0.39652	0.341628	0.284074	0.217527	0.152546	0.109151	0.0657573	0.0505239	0.037495	0.0260766	0.0150376	0.0143562	0.0183413	0.026556	0.0379692	0.049975	0.0627063	0.0754375	0.0910261	0.106899	0.122527	0.138082	0.164594	0.197552	0.220333	0.233318	0.241553	0.242352	0.236783	0.213944	0.193485	0.188975	0.184573	0.191076	0.197579	0.211379	0.226082	0.24358	0.262008	0.285299	0.311703	0.322217	0.31619	0.297283	0.254416	0.209415
0.0372617	0.0485995	0.0564615	0.0630077	0.0725069	0.0839309	0.0948666	0.0955838	0.0963011	0.0981714	0.100134	0.0902119	0.0774175	0.0687794	0.062049	0.0513001	0.0374649	0.0446422	0.0779627	0.112237	0.14849	0.185647	0.226778	0.264317	0.250537	0.236757	0.224765	0.212877	0.193761	0.173122	0.157145	0.143111	0.13627	0.134944	0.136426	0.141693	0.153318	0.17936	0.205622	0.232841	0.263087	0.336168	0.409249	0.484434	0.559739	0.599317	0.631349	0.630919	0.616957	0.567695
0.451767	0.468453	0.481403	0.450021	0.404974	0.367058	0.333083	0.299108	0.274313	0.253748	0.233088	0.212354	0.196523	0.186822	0.177885	0.170691	0.162097	0.146413	0.130467	0.108948	0.0874282	0.0799989	0.0737187	0.0840622	0.0995181	0.110267	0.118422	0.117412	0.108104	0.0985457	0.0886203	0.0786949	0.0730884	0.068274	0.0632059	0.0580417	0.0520798	0.0455961	0.03864	0.0311403	0.0263922	0.027364	0.0265426	0.0187756	0.0120813	0.0169042	0.0217271	0.0245287	0.0272566	0.0372617
0.235235	0.218082	0.212191	0.229278	0.237683	0.224707	0.211731	0.190671	0.16289	0.157512	0.151707	0.141644	0.133038	0.125184	0.118587	0.122764	0.140245	0.15863	0.170908	0.160006	0.148991	0.137902	0.123862	0.107445	0.0867281	0.0710425	0.0614491	0.101196	0.133304	0.15655	0.179797	0.203952	0.221964	0.1819	0.155293	0.142672	0.136287	0.132794	0.135532	0.116453	0.0843431	0.132399	0.182077	0.234443	0.273622	0.296265	0.249446	0.213531	0.186905	0.161915
0.227228	0.192618	0.152772	0.117283	0.108827	0.100664	0.107932	0.1152	0.181281	0.253985	0.323282	0.391497	0.455366	0.496249	0.533654	0.485346	0.437038	0.368732	0.298659	0.25251	0.213156	0.202998	0.207961	0.199737	0.180217	0.163483	0.150946	0.134353	0.104848	0.0811093	0.124231	0.167353	0.217952	0.268868	0.310103	0.349482	0.396005	0.454233	0.500933	0.514722	0.527446	0.533585	0.539724	0.537743	0.535757	0.531436	0.526794	0.482398	0.42399	0.360326
0.157599	0.184165	0.213887	0.23669	0.247264	0.263122	0.299904	0.336159	0.366488	0.396818	0.459755	0.523986	0.532544	0.529029	0.526624	0.524691	0.496861	0.450418	0.444467	0.485669	0.539164	0.616331	0.692302	0.764074	0.832496	0.863416	0.894336	0.865579	0.834478	0.753155	0.660971	0.55505	0.442725	0.338809	0.23875	0.223563	0.208375	0.206214	0.205344	0.190345	0.171581	0.170965	0.180207	0.19015	0.200774	0.206647	0.203683	0.197636	0.181254	0.164282
0.0124543	0.015567	0.0203577	0.0388699	0.0718592	0.100834	0.122879	0.14719	0.178418	0.209647	0.20741	0.189897	0.168805	0.144979	0.113294	0.0718807	0.0406835	0.030532	0.0225781	0.0230424	0.0234127	0.02279	0.0221672	0.019076	0.0158465	0.0181924	0.0217047	0.022941	0.023234	0.0250076	0.0279117	0.0321023	0.0380176	0.0439329	0.0754837	0.110287	0.199583	0.305415	0.424783	0.55219	0.635269	0.67169	0.669524	0.600916	0.521338	0.404488	0.293379	0.230088	0.166798	0.133626
0.0865225	0.0818076	0.0775206	0.0776037	0.0783165	0.0779724	0.203257	0.455993	0.669545	0.862888	0.997705	0.9953	0.864388	0.72668	0.57284	0.463102	0.378802	0.32378	0.274167	0.23474	0.205347	0.181205	0.160712	0.14249	0.128979	0.115387	0.101753	0.098723	0.0980141	0.101777	0.1067	0.112227	0.112399	0.110512	0.104608	0.102391	0.102101	0.110011	0.126904	0.159155	0.193817	0.222984	0.238824	0.240065	0.21808	0.190585	0.165597	0.145257	0.130438	0.125221
0.297705	0.33935	0.375007	0.410665	0.440798	0.465632	0.466568	0.463518	0.456176	0.457388	0.458931	0.447596	0.4244	0.38737	0.346814	0.306391	0.273267	0.250189	0.238817	0.233572	0.228839	0.218059	0.205003	0.189295	0.163276	0.136019	0.120576	0.105133	0.0773083	0.0531288	0.0378992	0.0321866	0.031781	0.0475958	0.0580639	0.0566518	0.0591631	0.0637048	0.0814459	0.105683	0.142418	0.168079	0.188037	0.184089	0.177712	0.167061	0.151847	0.13452	0.122685	0.109942
0.164403	0.147362	0.127134	0.120233	0.111521	0.0995315	0.0997178	0.105453	0.117355	0.132796	0.154632	0.176585	0.198594	0.234849	0.282481	0.297681	0.303899	0.292126	0.2797	0.26671	0.325085	0.403629	0.515693	0.586453	0.621486	0.606382	0.571603	0.491129	0.445395	0.429685	0.426211	0.421213	0.404444	0.369304	0.316974	0.275256	0.235315	0.200045	0.168206	0.159618	0.15145	0.143871	0.135293	0.126716	0.121154	0.113878	0.10439	0.0894327	0.0727055	0.054494
0.0938652	0.0851478	0.0770754	0.0727212	0.0769536	0.0864597	0.10209	0.108395	0.100654	0.0915644	0.0822837	0.0743668	0.0723325	0.0760691	0.0689036	0.0620706	0.0595091	0.0615774	0.0663196	0.0742445	0.0781931	0.0762465	0.0685268	0.0607655	0.0620322	0.0693148	0.0817141	0.097798	0.107267	0.101672	0.0960774	0.0986926	0.103423	0.111018	0.119201	0.127767	0.122121	0.11268	0.0971759	0.106077	0.120648	0.124937	0.129194	0.133424	0.130028	0.123164	0.109362	0.102469	0.0985587	0.0730178
NaN	NaN	NaN	NaN	NaN	NaN	NaN	NaN	NaN	NaN	NaN	NaN	NaN	NaN	NaN	NaN	NaN	NaN	NaN	NaN	NaN	NaN	NaN	NaN	NaN	NaN	NaN	NaN	0.350717	0.348492	0.33934	0.320415	0.29909	0.279144	0.272587	0.281879	0.308701	0.372406	0.439047	0.469656	0.492822	0.48514	0.477458	0.409208	0.344257	0.301372	0.270444	0.248355	0.23274	0.217386
0.00598766	0.00630759	0.00679068	0.00741671	0.00668559	0.00548831	0.00329812	0.0018076	0.00093011	3.30133e-05	-0.000509856	0.000265034	0.000654933	0.000707515	0.00238683	0.003979	0.0042225	0.00433166	0.0043134	0.00275215	0.000925409	0.000991035	0.00196198	0.00199969	0.00236917	0.00334674	0.0034713	0.00318141	0.00295266	0.00295126	0.00340395	0.00434778	0.00552959	0.00855514	0.0116707	0.0149419	0.0163336	0.0167294	0.0156865	0.014926	0.0148691	0.0142584	0.0133537	0.0127263	0.0121006	0.0108077	0.00954437	0.00864448	0.00745947	0.00606251
0.0596267	0.0636916	0.0672586	0.0703623	0.075078	0.0925502	0.160609	0.264274	0.398516	0.478076	0.530964	0.515484	0.500004	0.39771	0.304704	0.242498	0.196225	0.158984	0.140571	0.124571	0.112843	0.10639	0.102672	0.0987678	0.0950393	0.0916554	0.0862258	0.0798254	0.074021	0.0691212	0.0659866	0.0648348	0.0645787	0.0619863	0.0597804	0.0582663	0.0576673	0.0575776	0.0603363	0.062903	0.0651543	0.0669064	0.068537	0.0720177	0.0760496	0.0810665	0.0844709	0.086961	0.0840188	0.0792825
0.4244	0.38737	0.346814	0.306391	0.273267	0.250189	0.238817	0.233572	0.228839	0.218059	0.205003	0.189295	0.163276	0.136019	0.120576	0.105133	0.0773083	0.0531288	0.0378992	0.0321866	0.031781	0.0475958	0.0580639	0.0566518	0.0591631	0.0637048	0.0814459	0.105683	0.142418	0.168079	0.188037	0.184089	0.177712	0.167061	0.151847	0.13452	0.122685	0.109942	0.0954533	0.0830575	0.0814702	0.0899152	0.108297	0.156339	0.214201	0.289668	0.337718	0.358612	0.345572	0.3188
0.141958	0.159378	0.169935	0.177044	0.175187	0.170345	0.159583	0.16703	0.1834	0.209283	0.229015	0.236549	0.225683	0.205948	0.1805	0.157085	0.138153	0.134	0.137667	0.16169	0.184988	0.206617	0.209483	0.20333	0.189985	0.179457	0.174581	0.176653	0.182066	0.178911	0.173821	0.164976	0.177007	0.199477	0.248141	0.296398	0.343919	0.359325	0.359038	0.341366	0.32394	0.30696	0.288962	0.270317	0.241384	0.213497	0.187504	0.182949	0.18735	0.180506
0.323481	0.42033	0.447892	0.43462	0.415209	0.367367	0.271652	0.252605	0.256042	0.247966	0.306589	0.425125	0.531016	0.636666	0.745099	0.722765	0.627868	0.495997	0.367465	0.243982	0.181568	0.141321	0.12774	0.12564	0.132552	0.146016	0.161157	0.178851	0.16934	0.147644	0.123194	0.101333	0.08264	0.075957	0.0750018	0.0864436	0.0953436	0.102445	0.194728	0.268086	0.303136	0.319155	0.318743	0.253092	0.21659	0.210818	0.192599	0.173587	0.158589	0.140674
0.125019	0.143993	0.156102	0.176382	0.195301	0.20266	0.226676	0.262723	0.242891	0.246956	0.298658	0.293411	0.270595	0.266106	0.229612	0.159593	0.114871	0.0789303	0.0583898	0.0482321	0.0447069	0.0502843	0.0526207	0.0497141	0.0467504	0.0439585	0.042366	0.0416064	0.0416212	0.0404795	0.0385893	0.0350666	0.0333093	0.0324373	0.0313769	0.0291401	0.0277383	0.0271087	0.0302791	0.0317827	0.0283875	0.0267087	0.0253617	0.0177345	0.0144319	0.0163095	0.0187511	0.0220251	0.0283323	0.0263136
0.0757426	0.0665343	0.0651125	0.0800116	0.100367	0.124416	0.147566	0.169991	0.16092	0.14426	0.115997	0.11115	0.118702	0.151103	0.188894	0.233518	0.273137	0.300118	0.284684	0.269251	0.243806	0.21214	0.157695	0.119604	0.10214	0.0884561	0.0767967	0.0704349	0.0687741	0.0706974	0.062297	0.0538202	0.0461269	0.03875	0.0320864	0.0300497	0.0306096	0.0337289	0.0376617	0.0422857	0.0485755	0.0556697	0.0631149	0.0658646	0.0669141	0.0655291	0.0678674	0.0719099	0.0796849	0.105741
0.164204	0.15325	0.152374	0.155438	0.160445	0.166756	0.17121	0.173646	0.198768	0.264398	0.320827	0.347995	0.373509	0.386804	0.400098	0.36868	0.307327	0.262715	0.237803	0.214425	0.194033	0.175187	0.161842	0.150003	0.151813	0.153623	0.151245	0.148779	0.14839	0.148339	0.139657	0.127936	0.214352	0.361019	0.491026	0.604333	0.701721	0.773094	0.798283	0.691886	0.588443	0.506735	0.425027	0.387641	0.350272	0.323021	0.29715	0.318013	0.355313	0.371749
0.125469	0.130523	0.132772	0.112541	0.0833845	0.0774693	0.0788619	0.0891141	0.0905439	0.089339	0.0847477	0.0763265	0.0654361	0.059576	0.0541873	0.0495097	0.045097	0.0415866	0.0430934	0.043152	0.0417496	0.0437644	0.0465394	0.0501674	0.055717	0.0617176	0.0534211	0.0483167	0.0477872	0.0543069	0.0624185	0.0696976	0.0778524	0.086726	0.084378	0.0808479	0.0765551	0.0597338	0.0378273	0.0181031	0.00664105	0.00447363	0.0134786	0.0226374	0.0261675	0.0296976	0.0334112	0.0351532	0.0287883	0.0241089
0.864388	0.72668	0.57284	0.463102	0.378802	0.32378	0.274167	0.23474	0.205347	0.181205	0.160712	0.14249	0.128979	0.115387	0.101753	0.098723	0.0980141	0.101777	0.1067	0.112227	0.112399	0.110512	0.104608	0.102391	0.102101	0.110011	0.126904	0.159155	0.193817	0.222984	0.238824	0.240065	0.21808	0.190585	0.165597	0.145257	0.130438	0.125221	0.1229	0.123425	0.123187	0.122115	0.119745	0.116839	0.11238	0.106286	0.0983987	0.0927297	0.0875561	0.0845543
0.177007	0.199477	0.248141	0.296398	0.343919	0.359325	0.359038	0.341366	0.32394	0.30696	0.288962	0.270317	0.241384	0.213497	0.187504	0.182949	0.18735	0.180506	0.173029	0.164403	0.147362	0.127134	0.120233	0.111521	0.0995315	0.0997178	0.105453	0.117355	0.132796	0.154632	0.176585	0.198594	0.234849	0.282481	0.297681	0.303899	0.292126	0.2797	0.26671	0.325085	0.403629	0.515693	0.586453	0.621486	0.606382	0.571603	0.491129	0.445395	0.429685	0.426211
0.0485557	0.0410213	0.0342974	0.0283579	0.0259872	0.0261521	0.0330631	0.0391857	0.0448169	0.0475985	0.0491117	0.0486243	0.0555758	0.0632425	0.062041	0.0616801	0.062161	0.0585103	0.0553414	0.0556713	0.0550223	0.0537504	0.0514617	0.048528	0.044467	0.0466928	0.0505559	0.0519177	0.0568184	0.0650733	0.0713817	0.0777456	0.0849879	0.0876876	0.0877047	0.0762159	0.0672653	0.0621126	0.0562544	0.051179	0.0510989	0.0482734	0.0432593	0.0502261	0.0558208	0.0573083	0.0601047	0.0626773	0.0559625	0.0491586
0.497222	0.435112	0.479246	0.520621	0.545779	0.570846	0.579242	0.587638	0.511291	0.424019	0.372439	0.333024	0.363888	0.44052	0.535857	0.650992	0.746522	0.808061	0.84059	0.784204	0.727818	0.641844	0.534932	0.449697	0.389343	0.340106	0.311883	0.291859	0.299914	0.317585	0.437192	0.5568	0.635046	0.711837	0.767078	0.817785	0.837368	0.844001	0.852058	0.861121	0.850835	0.818397	0.799707	0.806959	0.814211	0.829555	0.846149	0.860157	0.873075	0.82148
0.0656646	0.0709219	0.0734363	0.072385	0.0558482	0.0425868	0.0554255	0.0769834	0.104641	0.109176	0.108215	0.0986091	0.0697783	0.0375965	0.0338934	0.0199692	-0.00385427	-0.00815665	-0.00999196	-0.0111845	-0.00265304	0.00335832	0.00605618	-0.00354998	-0.0177734	-0.0393872	-0.0449763	-0.0395031	-0.0213496	-0.00504904	0.00745627	0.0144919	0.0201349	0.0293347	0.0440118	0.0641837	0.0683322	0.0714058	0.0775695	0.0781764	0.0758376	0.0743147	0.0727918	0.0706392	0.0658192	0.061478	0.0575113	0.0636958	0.0650967	0.0558862
0.19454	0.199106	0.193051	0.191621	0.220652	0.249509	0.263476	0.277443	0.283451	0.288492	0.266857	0.237327	0.216408	0.200085	0.192539	0.192719	0.196201	0.204398	0.211934	0.217867	0.2238	0.225459	0.22417	0.221953	0.218614	0.217155	0.219839	0.221314	0.216977	0.212924	0.231784	0.250644	0.256699	0.261204	0.286063	0.317643	0.351555	0.386824	0.415429	0.437686	0.453475	0.458352	0.454194	0.420194	0.389956	0.389613	0.38927	0.395389	0.40169	0.394687
0.379925	0.332781	0.352771	0.372761	0.446262	0.523903	0.580389	0.631856	0.637293	0.619894	0.562956	0.4733	0.401375	0.353107	0.307677	0.269987	0.234324	0.212422	0.19059	0.177021	0.163452	0.152031	0.14088	0.161451	0.191563	0.250371	0.324714	0.412483	0.512216	0.569646	0.565846	0.548319	0.489393	0.430466	0.3575	0.270989	0.211408	0.197875	0.203218	0.265494	0.330359	0.416385	0.502411	0.537513	0.572059	0.516719	0.445418	0.361366	0.272573	0.21126
0.123194	0.101333	0.08264	0.075957	0.0750018	0.0864436	0.0953436	0.102445	0.194728	0.268086	0.303136	0.319155	0.318743	0.253092	0.21659	0.210818	0.192599	0.173587	0.158589	0.140674	0.111295	0.0958531	0.0908833	0.0862655	0.0823309	0.0798345	0.0756255	0.0708508	0.067829	0.0663755	0.0666567	0.0652927	0.0640436	0.0640069	0.0661038	0.0694533	0.0758955	0.0822038	0.0882918	0.087772	0.0855507	0.0853926	0.0852345	0.0826565	0.0770234	0.0721631	0.0669448	0.0590644	0.0550429	0.0540804
0.270317	0.241384	0.213497	0.187504	0.182949	0.18735	0.180506	0.173029	0.164403	0.147362	0.127134	0.120233	0.111521	0.0995315	0.0997178	0.105453	0.117355	0.132796	0.154632	0.176585	0.198594	0.234849	0.282481	0.297681	0.303899	0.292126	0.2797	0.26671	0.325085	0.403629	0.515693	0.586453	0.621486	0.606382	0.571603	0.491129	0.445395	0.429685	0.426211	0.421213	0.404444	0.369304	0.316974	0.275256	0.235315	0.200045	0.168206	0.159618	0.15145	0.143871
Time relative to onset of a reversal (s)
-20	-19.5	-19	-18.5	-18	-17.5	-17	-16.5	-16	-15.5	-15	-14.5	-14	-13.5	-13	-12.5	-12	-11.5	-11	-10.5	-10	-9.5	-9	-8.5	-8	-7.5	-7	-6.5	-6	-5.5	-5	-4.5	-4	-3.5	-3	-2.5	-2	-1.5	-1	-0.5	0	0.5	1	1.5	2	2.5	3	3.5	4	4.5
Calcium activity in AIY (dR/R0)
0.182967	0.174959	0.165934	0.156845	0.147889	0.13242	0.111953	0.100695	0.0876492	0.0661698	0.050853	0.0398973	0.0255685	0.0109692	0.0122762	0.0204396	0.0333161	0.0501963	0.0734449	0.0949242	0.115897	0.141655	0.161316	0.171279	0.167746	0.158421	0.134587	0.119425	0.118056	0.122196	0.128895	0.142415	0.151832	0.154726	0.159634	0.165632	0.176848	0.188065	0.205681	0.221282	0.230954	0.234245	0.233727	0.235765	0.24067	0.25187	0.259685	0.265648	0.281504	0.298805
0.391429	0.354635	0.337409	0.34521	0.349381	0.356683	0.394662	0.42359	0.44096	0.439765	0.431857	0.414346	0.401906	0.397093	0.393983	0.391665	0.391555	0.376301	0.338292	0.280323	0.215969	0.173682	0.131395	0.0964651	0.0671515	0.0589165	0.0506262	0.0422806	0.0387914	0.0368457	0.0381424	0.0398179	0.0418728	0.0386545	0.0401342	0.0679537	0.1021	0.142097	0.179812	0.212155	0.221977	0.220317	0.208055	0.209728	0.215784	0.230923	0.24627	0.271808	0.301237	0.337582
0.274962	0.244238	0.194104	0.146376	0.128396	0.110415	0.103887	0.0978947	0.100434	0.104656	0.119038	0.13747	0.161374	0.188996	0.210945	0.226105	0.243306	0.264553	0.284062	0.297239	0.309571	0.313852	0.318134	0.293307	0.267745	0.237786	0.201637	0.167093	0.136392	0.10891	0.096543	0.0846201	0.0802346	0.075849	0.0763628	0.0772126	0.0770895	0.0767464	0.0814973	0.0884774	0.0946435	0.100159	0.120029	0.158498	0.200403	0.249744	0.295773	0.326291	0.356808	0.35539
0.144242	0.140777	0.129328	0.129044	0.134705	0.142337	0.144167	0.133245	0.120948	0.10792	0.113214	0.13092	0.173233	0.191746	0.197612	0.193889	0.181754	0.152937	0.152088	0.16499	0.18982	0.214651	0.243799	0.279073	0.309165	0.339058	0.390166	0.442747	0.497596	0.550056	0.598641	0.59531	0.585075	0.564204	0.520384	0.469861	0.448165	0.425719	0.402117	0.391227	0.38238	0.341205	0.315322	0.311119	0.304389	0.296744	0.298517	0.308516	0.292527	0.273146
0.305847	0.286249	0.272725	0.259201	0.256677	0.254649	0.307332	0.370654	0.409869	0.439569	0.462181	0.480005	0.464132	0.411314	0.365026	0.330489	0.297186	0.267842	0.246491	0.285575	0.32466	0.338165	0.351068	0.352933	0.352961	0.35299	0.298731	0.235443	0.19898	0.17208	0.247705	0.398431	0.541005	0.673918	0.78884	0.868461	0.90924	0.792292	0.675264	0.557275	0.439286	0.36192	0.286343	0.238012	0.194956	0.164938	0.140056	0.122552	0.110014	0.0974748
0.888426	0.823874	0.73874	0.652717	0.572276	0.500152	0.434287	0.388687	0.348373	0.320432	0.296147	0.27484	0.255928	0.236972	0.216736	0.199069	0.183673	0.172869	0.162745	0.151084	0.139312	0.133511	0.130053	0.129959	0.134633	0.140568	0.142346	0.142791	0.141325	0.137864	0.1338	0.132137	0.132759	0.136937	0.143018	0.149996	0.159559	0.169294	0.179274	0.193636	0.209388	0.222274	0.235161	0.242462	0.247135	0.245069	0.23806	0.226694	0.216775	0.207449
0.433286	0.397706	0.322414	0.247122	0.212175	0.18373	0.187231	0.201886	0.217049	0.23451	0.250945	0.24313	0.235315	0.202779	0.168129	0.162299	0.163611	0.181958	0.209019	0.238253	0.26933	0.290785	0.297889	0.305357	0.313753	0.324223	0.345438	0.366738	0.389982	0.413226	0.437934	0.462767	0.469364	0.450966	0.428963	0.398614	0.364687	0.312228	0.260098	0.215522	0.170947	0.146458	0.123673	0.104952	0.0873654	0.0944742	0.114192	0.13229	0.149019	0.164947
0.340156	0.317094	0.311714	0.303526	0.281879	0.260233	0.265608	0.284111	0.322494	0.379614	0.422961	0.445216	0.474465	0.526507	0.57732	0.61866	0.66	0.730791	0.80173	0.848635	0.8921	0.868661	0.821125	0.756718	0.681742	0.595363	0.496383	0.416903	0.372884	0.337718	0.334947	0.331261	0.318878	0.306495	0.321187	0.336568	0.379872	0.428686	0.489564	0.555731	0.606901	0.647003	0.669741	0.671731	0.66457	0.637548	0.613496	0.60343	0.592146	0.560105
0.00421053	0.00012359	-0.00115756	-0.00219803	-0.00275337	-0.0021821	-0.00141691	0.000224577	0.00187383	0.00364209	0.00541035	0.00623003	0.00699022	0.00704023	0.0069354	0.00981217	0.0139583	0.0200404	0.0275166	0.0665226	0.145463	0.213744	0.2595	0.302236	0.33301	0.357629	0.312986	0.268344	0.247915	0.228459	0.222136	0.218664	0.304362	0.427986	0.549482	0.669449	0.766105	0.835573	0.84883	0.753841	0.657565	0.55677	0.464681	0.470564	0.476447	0.478979	0.481377	0.479396	0.476466	0.432704
0.0851913	0.0895655	0.0958693	0.100875	0.110923	0.127104	0.137916	0.146047	0.148279	0.178306	0.227412	0.274024	0.314648	0.344884	0.338839	0.319782	0.301406	0.336799	0.430721	0.510349	0.573596	0.591852	0.54075	0.447883	0.387043	0.340818	0.318355	0.31275	0.307825	0.277777	0.281325	0.315836	0.318604	0.31779	0.31102	0.295397	0.282082	0.273472	0.289897	0.316212	0.351945	0.348057	0.359418	0.426179	0.525666	0.640294	0.697788	0.703417	0.636769	0.520844
0.227376	0.288523	0.353048	0.393025	0.411093	0.41915	0.412718	0.394503	0.347216	0.301372	0.265314	0.229206	0.187223	0.145241	0.121806	0.100696	0.0922166	0.0884367	0.087632	0.0887407	0.0921768	0.0980467	0.103917	0.110054	0.116348	0.120167	0.121599	0.121815	0.12012	0.11934	0.121323	0.123578	0.127672	0.131761	0.135159	0.138558	0.148647	0.15957	0.156936	0.15023	0.152452	0.159499	0.159172	0.152263	0.150717	0.157585	0.164453	0.166176	0.166525	0.16504
0.317479	0.316647	0.311605	0.30648	0.261646	0.2104	0.195039	0.192207	0.204396	0.226556	0.248343	0.265911	0.28348	0.283342	0.282489	0.26243	0.238746	0.213301	0.187175	0.175766	0.174118	0.168018	0.157117	0.151281	0.156136	0.159265	0.154603	0.151648	0.188226	0.224805	0.255888	0.286371	0.328078	0.372919	0.398759	0.384521	0.37404	0.378442	0.380953	0.362125	0.343296	0.37963	0.419385	0.419508	0.411037	0.401702	0.391999	0.351481	0.286926	0.235686
-0.0393872	-0.0449763	-0.0395031	-0.0213496	-0.00504904	0.00745627	0.0144919	0.0201349	0.0293347	0.0440118	0.0641837	0.0683322	0.0714058	0.0775695	0.0781764	0.0758376	0.0743147	0.0727918	0.0706392	0.0658192	0.061478	0.0575113	0.0636958	0.0650967	0.0558862	0.0482802	0.0418701	0.0415631	0.0402542	0.0378182	0.0515131	0.0628061	0.0587152	0.0677493	0.0846183	0.0840447	0.0845498	0.0876821	0.0867301	0.0842079	0.0817178	0.0792278	0.0796392	0.0870991	0.0931657	0.0991407	0.115039	0.128514	0.138827	0.135543
0.0620322	0.0693148	0.0817141	0.097798	0.107267	0.101672	0.0960774	0.0986926	0.103423	0.111018	0.119201	0.127767	0.122121	0.11268	0.0971759	0.106077	0.120648	0.124937	0.129194	0.133424	0.130028	0.123164	0.109362	0.102469	0.0985587	0.0730178	0.0511663	0.0345933	0.0396938	0.0520297	0.0719715	0.101091	0.137044	0.138182	0.132573	0.117574	0.0962153	0.0754187	0.0808916	0.0879425	0.0966176	0.105049	0.111153	0.109879	0.128171	0.159802	0.194702	0.217082	0.218474	0.288917
0.0439749	0.0392384	0.0456174	0.0519963	0.0847184	0.119188	0.159682	0.201514	0.254478	0.312724	0.354333	0.382784	0.388969	0.36663	0.333548	0.275183	0.215816	0.151841	0.0899025	0.0606705	0.0314386	0.0180167	0.00599592	0.000959138	-0.00231414	-0.00558742	-0.010901	-0.016496	-0.0204723	-0.0238148	-0.0173757	-0.00438292	0.00900803	0.0228324	0.0414461	0.0686187	0.098615	0.137602	0.183263	0.278997	0.37473	0.440997	0.507223	0.530669	0.545907	0.529883	0.501642	0.471491	0.440062	0.408742
0.145606	0.167557	0.191374	0.239125	0.303506	0.341802	0.35068	0.356639	0.356665	0.353014	0.335546	0.318078	0.301518	0.37482	0.448122	0.458464	0.461025	0.442319	0.417269	0.34982	0.257491	0.184894	0.132818	0.0936457	0.0764272	0.0631101	0.0628246	0.0634709	0.0716252	0.0797796	0.0802671	0.0806802	0.0731481	0.0642184	0.0610805	0.0600826	0.062001	0.078097	0.095303	0.133338	0.171373	0.26718	0.368646	0.421045	0.460464	0.484433	0.50082	0.483224	0.437891	0.414065
0.269527	0.288099	0.345542	0.428364	0.497787	0.551781	0.579304	0.556524	0.521383	0.443614	0.369384	0.325314	0.281243	0.255833	0.230708	0.221169	0.214494	0.209263	0.204581	0.199791	0.194454	0.188849	0.172894	0.156938	0.147682	0.139127	0.130805	0.122547	0.116725	0.112127	0.106905	0.101163	0.0949441	0.088083	0.080838	0.0727174	0.0643872	0.0551338	0.0461588	0.0430387	0.0399186	0.041185	0.042804	0.04714	0.0521317	0.0584286	0.0653236	0.0734817	0.0827808	0.122653
0.558233	0.497738	0.42874	0.37115	0.334161	0.302249	0.28672	0.27266	0.269747	0.266834	0.270241	0.273672	0.306246	0.342931	0.377165	0.406107	0.427768	0.415438	0.402052	0.371129	0.340207	0.335472	0.33251	0.387907	0.458206	0.510004	0.552137	0.576085	0.583006	0.563387	0.499872	0.439781	0.389599	0.338768	0.283046	0.227323	0.20044	0.173643	0.143092	0.108741	0.0839849	0.0750846	0.068564	0.0689227	0.0693014	0.0698315	0.0703615	0.0793822	0.0884268	0.105714
0.109471	0.0985625	0.0886557	0.0800758	0.0761431	0.0716762	0.0667628	0.0629441	0.0591416	0.0549009	0.0514851	0.0487054	0.0474828	0.0464653	0.0462718	0.046201	0.0460042	0.0456367	0.0451146	0.046752	0.0798135	0.250005	0.423091	0.598794	0.73944	0.834536	0.774045	0.699765	0.613971	0.534689	0.459707	0.397463	0.343921	0.297649	0.262948	0.233111	0.215119	0.197127	0.179959	0.166355	0.160118	0.155649	0.152154	0.147406	0.140047	0.127307	0.114659	0.102074	0.0926553	0.0847154
0.176464	0.190771	0.192187	0.193602	0.193764	0.191382	0.186042	0.169606	0.154642	0.154522	0.154401	0.155396	0.156426	0.15491	0.152947	0.143416	0.131096	0.11806	0.104568	0.0950863	0.0897649	0.0907187	0.103306	0.1188	0.143991	0.169876	0.201337	0.232798	0.263184	0.292259	0.318168	0.337675	0.349792	0.334274	0.319324	0.310057	0.300791	0.284585	0.268172	0.248688	0.228581	0.204773	0.179461	0.154962	0.131026	0.111938	0.0987531	0.0898726	0.0896767	0.0904135
0.195877	0.2117	0.245695	0.289467	0.348396	0.420808	0.494855	0.571463	0.623719	0.610137	0.592418	0.551326	0.510193	0.467742	0.425291	0.3887	0.352684	0.318796	0.285617	0.244884	0.199728	0.181772	0.189907	0.196395	0.200084	0.205257	0.215376	0.225494	0.220883	0.19681	0.184452	0.198096	0.222296	0.305938	0.389282	0.444878	0.500474	0.540172	0.577511	0.581962	0.57551	0.567993	0.559854	0.552296	0.545296	0.522784	0.476109	0.433041	0.399671	0.365807
0.217424	0.210675	0.206734	0.21434	0.221946	0.229496	0.23698	0.23186	0.219562	0.19066	0.185704	0.196486	0.235087	0.292165	0.379376	0.439903	0.489025	0.518454	0.511221	0.469982	0.423801	0.377238	0.331483	0.309543	0.302225	0.344829	0.379192	0.401734	0.424276	0.435469	0.439328	0.408794	0.391306	0.395066	0.418182	0.446729	0.473307	0.4581	0.406721	0.369285	0.330034	0.284312	0.268617	0.264563	0.237568	0.217329	0.205223	0.198904	0.197514	0.210672
0.0633037	0.0549413	0.04789	0.045996	0.0452705	0.0454869	0.0439333	0.0413384	0.0465442	0.0493969	0.0479632	0.0495177	0.0515317	0.0472764	0.0434413	0.0400524	0.0339252	0.0294209	0.0306912	0.033253	0.0366474	0.0438662	0.0477126	0.0468361	0.0455387	0.0434944	0.0383785	0.0398992	0.0466683	0.0533798	0.0614989	0.0727506	0.0796033	0.0853836	0.100806	0.107687	0.104129	0.165681	0.239838	0.344354	0.483102	0.568813	0.605578	0.516619	0.400926	0.269247	0.198764	0.145671	0.122459	0.108558
0.15216	0.120723	0.096323	0.0871098	0.086324	0.101268	0.115117	0.127173	0.120297	0.115497	0.113182	0.117117	0.119208	0.111788	0.11768	0.131703	0.143883	0.173392	0.232374	0.255085	0.263557	0.257504	0.225777	0.171303	0.144741	0.128156	0.128432	0.139363	0.154084	0.15691	0.160778	0.166014	0.156857	0.147758	0.154971	0.142087	0.112879	0.124801	0.130544	0.118546	0.130523	0.14788	0.131829	0.1278	0.137037	0.146274	0.146774	0.156121	0.212409	0.235824
0.0730984	0.0726897	0.072228	0.0730021	0.0748248	0.0842138	0.0980229	0.123733	0.14498	0.162743	0.164108	0.161442	0.150898	0.140354	0.127786	0.112859	0.106414	0.102446	0.101846	0.101854	0.102695	0.10181	0.100106	0.0952736	0.0905249	0.0858905	0.0817297	0.0775618	0.0716517	0.0675728	0.0660042	0.0636004	0.061214	0.0612847	0.0606214	0.0590322	0.0607616	0.0634161	0.0663282	0.0693968	0.0716115	0.0730491	0.0727689	0.0713548	0.069309	0.0669658	0.0643425	0.0610364	0.0602	0.0608632
0.0297596	0.0289084	0.0282926	0.0278427	0.0301856	0.0327002	0.0348598	0.0379723	0.0417568	0.0429941	0.0440296	0.0467796	0.050061	0.0496642	0.0493431	0.0491526	0.04732	0.0448864	0.0477793	0.0502226	0.0518882	0.0537629	0.0556548	0.0561388	0.0570728	0.0587829	0.0620609	0.0657683	0.0649678	0.0648739	0.0659985	0.064198	0.06129	0.0605325	0.059775	0.0571117	0.0555447	0.0579118	0.062563	0.0688201	0.0773981	0.0847568	0.0878522	0.086751	0.0826922	0.0751032	0.0674645	0.0604474	0.0537933	0.0473944
0.426979	0.354583	0.288218	0.243063	0.207799	0.179629	0.156987	0.137597	0.122652	0.109734	0.101495	0.0932551	0.0849109	0.074206	0.063501	0.0555535	0.047838	0.0436739	0.0403842	0.0360256	0.0311699	0.0271811	0.0238664	0.0200477	0.0155941	0.0107925	0.0052603	9.34157e-05	-0.00363563	-0.00727833	-0.00898995	-0.0107016	-0.0110878	-0.0113632	-0.00996903	-0.00811213	-0.00567696	-0.000263756	0.0052005	0.0118063	0.0184122	0.0177427	0.0164646	0.0478946	0.087349	0.13976	0.198178	0.304252	0.447347	0.553409
0.186519	0.167814	0.152512	0.141481	0.14516	0.148553	0.149517	0.15048	0.164139	0.177986	0.196599	0.215953	0.338311	0.499739	0.639385	0.764821	0.845576	0.878963	0.912349	0.856375	0.719746	0.597757	0.497222	0.435112	0.479246	0.520621	0.545779	0.570846	0.579242	0.587638	0.511291	0.424019	0.372439	0.333024	0.363888	0.44052	0.535857	0.650992	0.746522	0.808061	0.84059	0.784204	0.727818	0.641844	0.534932	0.449697	0.389343	0.340106	0.311883	0.291859
NaN	NaN	NaN	NaN	NaN	NaN	NaN	NaN	NaN	NaN	NaN	NaN	NaN	NaN	NaN	NaN	NaN	NaN	NaN	NaN	NaN	NaN	NaN	NaN	NaN	NaN	NaN	NaN	NaN	NaN	NaN	NaN	NaN	NaN	NaN	NaN	NaN	0.525695	0.465338	0.404982	0.3951	0.389442	0.383783	0.385199	0.389055	0.391432	0.389208	0.384221	0.359668	0.335174
0.0241177	0.0234785	0.0261609	0.0292589	0.0310606	0.0324724	0.0345274	0.0369304	0.0492913	0.0712654	0.101818	0.145857	0.192365	0.24558	0.298796	0.343895	0.385977	0.419155	0.446616	0.451121	0.429657	0.39652	0.341628	0.284074	0.217527	0.152546	0.109151	0.0657573	0.0505239	0.037495	0.0260766	0.0150376	0.0143562	0.0183413	0.026556	0.0379692	0.049975	0.0627063	0.0754375	0.0910261	0.106899	0.122527	0.138082	0.164594	0.197552	0.220333	0.233318	0.241553	0.242352	0.236783
0.477855	0.4737	0.4808	0.508474	0.542944	0.605654	0.66915	0.742504	0.815858	0.845159	0.870304	0.887825	0.90312	0.889876	0.861546	0.812566	0.745566	0.668606	0.57756	0.500717	0.45798	0.415243	0.421695	0.445936	0.462588	0.474478	0.476207	0.46667	0.441594	0.38816	0.333822	0.276177	0.221492	0.195136	0.168781	0.145964	0.123396	0.118436	0.117484	0.113629	0.108496	0.113962	0.127275	0.138004	0.145371	0.152738	0.173814	0.195543	0.20256	0.206229
0.268869	0.223834	0.173048	0.142358	0.125022	0.11735	0.110877	0.106229	0.10541	0.100295	0.093361	0.0902023	0.0911295	0.0972864	0.181353	0.272435	0.324911	0.374628	0.42246	0.447373	0.480323	0.529779	0.565749	0.586706	0.522333	0.45338	0.379654	0.323062	0.267918	0.210157	0.170152	0.140717	0.134709	0.130625	0.12916	0.127033	0.124717	0.119176	0.10535	0.0998256	0.0990814	0.0880344	0.0731962	0.0519906	0.0492324	0.0533134	0.0633756	0.0747169	0.087155	0.173338
0.0770832	0.0754024	0.0759912	0.0767488	0.0778559	0.0787822	0.0796017	0.0775078	0.075102	0.0721047	0.0693884	0.0679047	0.0664503	0.0650224	0.0648397	0.0644198	0.0619596	0.059894	0.0581845	0.0606076	0.0667714	0.0848988	0.197101	0.394214	0.562162	0.71338	0.81748	0.816567	0.720948	0.626645	0.535931	0.458282	0.389461	0.327982	0.286243	0.249574	0.222661	0.197365	0.173413	0.153508	0.134777	0.118533	0.104666	0.0927755	0.0849669	0.0780366	0.0721859	0.0673437	0.0634095	0.0593576
0.640294	0.697788	0.703417	0.636769	0.520844	0.401346	0.32966	0.274313	0.23394	0.207753	0.184177	0.163374	0.140892	0.119447	0.123392	0.128688	0.135722	0.152269	0.178775	0.24482	0.312703	0.382275	0.442831	0.477072	0.446621	0.395914	0.335898	0.290098	0.25288	0.226637	0.219079	0.216467	0.216	0.240361	0.284661	0.30644	0.326833	0.341618	0.350839	0.29545	0.251215	0.222393	0.200325	0.181048	0.166571	0.146626	0.122452	0.105387	0.0929356	0.0890822
0.0448622	0.0474917	0.0508113	0.0545647	0.056585	0.0559967	0.055654	0.0553734	0.0548098	0.0551786	0.0569508	0.0566867	0.0555722	0.0529231	0.0508418	0.0496142	0.0497465	0.0504918	0.0527904	0.053749	0.0526942	0.0526442	0.0528915	0.0516531	0.0524055	0.0561491	0.059315	0.0622777	0.0650116	0.0676167	0.0654814	0.0622521	0.0569037	0.0524029	0.0483397	0.0457988	0.0437718	0.0427436	0.0443545	0.0473069	0.055136	0.0650141	0.0785379	0.0878298	0.0951872	0.096626	0.0966824	0.094281	0.0967678	0.101368
0.104055	0.104775	0.103184	0.0984925	0.0936967	0.0913485	0.0916562	0.0945944	0.0986716	0.102415	0.103344	0.104272	0.0985453	0.0930785	0.0888031	0.0859466	0.0838792	0.0840045	0.0830145	0.0796044	0.0737654	0.0666969	0.061686	0.056554	0.05119	0.0477212	0.0452167	0.0427928	0.0413215	0.0416736	0.0410182	0.0398761	0.0379095	0.0360543	0.0344126	0.0328828	0.032024	0.0318994	0.0325595	0.0348233	0.0373918	0.0397266	0.0410036	0.04115	0.0400658	0.0390695	0.0398769	0.0417959	0.0448114	0.0464326
0.113597	0.111166	0.111287	0.114426	0.11696	0.119193	0.158595	0.188227	0.201627	0.199511	0.188158	0.14076	0.111428	0.101543	0.113891	0.129468	0.144388	0.149683	0.14946	0.136776	0.120211	0.0975386	0.0922923	0.0931101	0.0974895	0.0979329	0.0946098	0.0968079	0.102222	0.114046	0.132881	0.154509	0.16146	0.158588	0.143152	0.136544	0.131384	0.124284	0.117796	0.111808	0.0968242	0.0825853	0.0714863	0.0646894	0.0594407	0.0499854	0.0445335	0.0437025	0.0471884	0.0529265
0.0424818	0.0375365	0.0446779	0.0560323	0.0667556	0.0834408	0.105896	0.10652	0.10364	0.0994863	0.088121	0.0725435	0.0795945	0.0963707	0.128243	0.141249	0.149544	0.160766	0.16241	0.155317	0.15458	0.148878	0.129919	0.113316	0.0981365	0.0871567	0.0837917	0.0905539	0.0928945	0.0935339	0.09129	0.0906516	0.0912593	0.082516	0.0749662	0.0708348	0.0605627	0.0497122	0.0646	0.0789426	0.0925938	0.11549	0.134998	0.13278	0.134966	0.140229	0.117134	0.106794	0.121023	0.129435
0.0551897	0.0530881	0.0509815	0.0493239	0.0497478	0.0506654	0.0520426	0.0556164	0.0596267	0.0636916	0.0672586	0.0703623	0.075078	0.0925502	0.160609	0.264274	0.398516	0.478076	0.530964	0.515484	0.500004	0.39771	0.304704	0.242498	0.196225	0.158984	0.140571	0.124571	0.112843	0.10639	0.102672	0.0987678	0.0950393	0.0916554	0.0862258	0.0798254	0.074021	0.0691212	0.0659866	0.0648348	0.0645787	0.0619863	0.0597804	0.0582663	0.0576673	0.0575776	0.0603363	0.062903	0.0651543	0.0669064
0.269175	0.345048	0.447691	0.550333	0.624526	0.695252	0.725139	0.742923	0.730587	0.700696	0.647908	0.573296	0.519692	0.498727	0.477763	0.440398	0.397613	0.371985	0.356348	0.326207	0.282232	0.241857	0.207071	0.176051	0.156199	0.138087	0.131398	0.124709	0.126997	0.12936	0.129889	0.13015	0.135855	0.143551	0.154672	0.167963	0.18422	0.203793	0.223366	0.246666	0.270072	0.29923	0.329383	0.348346	0.363217	0.373364	0.380264	0.383285	0.381975	0.387571
0.0427868	0.0545173	0.0671316	0.0801146	0.0960818	0.125127	0.153185	0.160699	0.168212	0.165061	0.160532	0.140966	0.1168	0.0979908	0.0823811	0.0757098	0.0777647	0.0828976	0.0933714	0.103249	0.111294	0.11926	0.126669	0.134079	0.175123	0.216646	0.266894	0.31898	0.353483	0.379145	0.37521	0.34456	0.311345	0.274385	0.244217	0.230988	0.21971	0.219815	0.21981	0.215689	0.211568	0.209982	0.208659	0.194356	0.176097	0.167275	0.164082	0.16374	0.166406	0.169085
0.143824	0.180598	0.238118	0.296076	0.380826	0.521262	0.632724	0.732155	0.831586	0.932669	0.955024	0.844658	0.662597	0.461848	0.307641	0.209385	0.168944	0.153157	0.141055	0.129877	0.122982	0.118721	0.122095	0.155683	0.232533	0.250811	0.251942	0.240389	0.210151	0.164462	0.161586	0.161666	0.162485	0.166306	0.153894	0.129976	0.135016	0.138031	0.134088	0.174996	0.233742	0.253578	0.265986	0.268869	0.223834	0.173048	0.142358	0.125022	0.11735	0.110877
0.262723	0.242891	0.246956	0.298658	0.293411	0.270595	0.266106	0.229612	0.159593	0.114871	0.0789303	0.0583898	0.0482321	0.0447069	0.0502843	0.0526207	0.0497141	0.0467504	0.0439585	0.042366	0.0416064	0.0416212	0.0404795	0.0385893	0.0350666	0.0333093	0.0324373	0.0313769	0.0291401	0.0277383	0.0271087	0.0302791	0.0317827	0.0283875	0.0267087	0.0253617	0.0177345	0.0144319	0.0163095	0.0187511	0.0220251	0.0283323	0.0263136	0.0172878	0.0188747	0.0214992	0.0246119	0.0318971	0.0409349	0.0500448
0.279618	0.269665	0.261301	0.254381	0.290875	0.39719	0.506028	0.621892	0.732338	0.804583	0.876828	0.836809	0.782058	0.724971	0.667079	0.622252	0.585292	0.563718	0.558549	0.550938	0.539061	0.526358	0.511102	0.494181	0.46555	0.436953	0.416102	0.395251	0.399902	0.40788	0.414379	0.420423	0.43121	0.444613	0.457529	0.459951	0.462372	0.47193	0.482069	0.47995	0.474854	0.560905	0.688909	0.790297	0.871176	0.93863	0.987903	0.988637	0.87866	0.770606
0.564204	0.520384	0.469861	0.448165	0.425719	0.402117	0.391227	0.38238	0.341205	0.315322	0.311119	0.304389	0.296744	0.298517	0.308516	0.292527	0.273146	0.258804	0.24227	0.223662	0.217888	0.210419	0.186774	0.160482	0.131685	0.102537	0.0761598	0.0615504	0.0525287	0.0483832	0.046191	0.0467116	0.0571127	0.0690725	0.0823913	0.09631	0.110315	0.143556	0.183052	0.210202	0.24537	0.293948	0.320764	0.340733	0.39303	0.436365	0.465939	0.492715	0.515385	0.484292
0.526466	0.53716	0.529962	0.510962	0.480522	0.436779	0.395723	0.359821	0.323919	0.291558	0.259962	0.227853	0.195504	0.172349	0.156341	0.146477	0.144369	0.145458	0.153257	0.159622	0.159552	0.159769	0.166393	0.173016	0.193726	0.21595	0.229044	0.239608	0.251384	0.263833	0.271573	0.275021	0.278379	0.277901	0.277424	0.291603	0.30772	0.328795	0.351409	0.395921	0.452591	0.47872	0.474696	0.457053	0.415533	0.369744	0.310685	0.253317	0.210574	0.167831
0.357523	0.260982	0.203922	0.191345	0.168633	0.144489	0.122948	0.103564	0.085619	0.0751245	0.065708	0.057938	0.0588461	0.06259	0.0661537	0.0790464	0.100502	0.106362	0.109998	0.111897	0.0997742	0.08051	0.0638842	0.0487853	0.0358748	0.0331636	0.0339502	0.0374948	0.0423746	0.0483682	0.0487016	0.0491111	0.0505329	0.053641	0.0572898	0.0591181	0.0678816	0.0842613	0.0875652	0.0883759	0.0886137	0.0800657	0.0654727	0.0525425	0.0424818	0.0375365	0.0446779	0.0560323	0.0667556	0.0834408
0.032024	0.0318994	0.0325595	0.0348233	0.0373918	0.0397266	0.0410036	0.04115	0.0400658	0.0390695	0.0398769	0.0417959	0.0448114	0.0464326	0.0472761	0.0456754	0.0438405	0.0417746	0.0416445	0.0424783	0.0461196	0.0491394	0.0515464	0.0523656	0.0525497	0.0512186	0.0501175	0.0492433	0.0484653	0.0473748	0.0448172	0.0426421	0.0408438	0.0376977	0.0347099	0.033535	0.0323296	0.0310964	0.0326616	0.0345146	0.0356903	0.0369779	0.0383672	0.038982	0.0392186	0.0383211	0.0370036	0.0353045	0.0352087	0.0360879
0.267334	0.273105	0.280821	0.290828	0.312818	0.360368	0.407918	0.459504	0.511865	0.582963	0.661377	0.730866	0.794386	0.860688	0.930013	0.972309	0.962042	0.934062	0.843138	0.749726	0.627386	0.505046	0.403918	0.304159	0.247743	0.200881	0.177263	0.163617	0.159748	0.162983	0.166218	0.184089	0.201967	0.21299	0.223076	0.23035	0.236733	0.265682	0.307336	0.36002	0.422895	0.49893	0.594723	0.672951	0.705928	0.734203	0.733549	0.732895	0.711221	0.689547
0.0495515	0.0477989	0.0512704	0.0589068	0.0537713	0.0482163	0.0433555	0.0364796	0.0292174	0.0261857	0.0284178	0.0363522	0.0418069	0.0473969	0.0545422	0.0576722	0.0583392	0.0635218	0.0686851	0.0737539	0.0820974	0.0884623	0.0784001	0.0694477	0.0661034	0.0574582	0.0443912	0.0477353	0.0504496	0.0472201	0.0532928	0.0643665	0.0757883	0.0949608	0.124534	0.130037	0.12934	0.125678	0.109836	0.0842122	0.0844125	0.0848135	0.0810686	0.0757613	0.0698137	0.0680018	0.0661899	0.0670633	0.0727857	0.0738709
0.0775405	0.089155	0.0975833	0.106012	0.116041	0.108945	0.0731157	0.0594364	0.0534176	0.0526898	0.0577299	0.0682807	0.0732793	0.072452	0.057099	0.0515341	0.0516469	0.0618353	0.0707783	0.0780503	0.0823207	0.0818515	0.059423	0.0579057	0.0753535	0.0843312	0.0895179	0.0870638	0.0773001	0.0635891	0.0595342	0.0603253	0.0680728	0.071046	0.073146	0.0767759	0.0814547	0.0869898	0.0938327	0.0945518	0.0810178	0.0682558	0.0568825	0.0575312	0.0607816	0.0669684	0.0772716	0.0864312	0.089997	0.0988365
0.0884744	0.101919	0.122115	0.154251	0.181405	0.192883	0.204542	0.217811	0.231079	0.23307	0.234845	0.228236	0.220272	0.210154	0.199205	0.184328	0.166384	0.151337	0.139956	0.128575	0.117465	0.106386	0.109406	0.116372	0.134204	0.157599	0.184165	0.213887	0.23669	0.247264	0.263122	0.299904	0.336159	0.366488	0.396818	0.459755	0.523986	0.532544	0.529029	0.526624	0.524691	0.496861	0.450418	0.444467	0.485669	0.539164	0.616331	0.692302	0.764074	0.832496
NaN	NaN	NaN	NaN	NaN	NaN	NaN	NaN	NaN	NaN	NaN	NaN	NaN	NaN	NaN	NaN	NaN	NaN	NaN	NaN	NaN	NaN	NaN	NaN	NaN	NaN	NaN	NaN	NaN	NaN	NaN	NaN	NaN	NaN	NaN	NaN	NaN	NaN	NaN	NaN	NaN	NaN	NaN	NaN	NaN	NaN	NaN	NaN	NaN	NaN
0.0871412	0.08007	0.075595	0.0728588	0.0744822	0.0767482	0.0794505	0.0855339	0.0922707	0.100113	0.112391	0.127676	0.151351	0.17236	0.184854	0.192184	0.196014	0.186844	0.177056	0.167979	0.157552	0.146285	0.138591	0.132683	0.130813	0.129108	0.128444	0.123724	0.114542	0.1082	0.102839	0.0993257	0.0980612	0.09908	0.0959206	0.0916592	0.0865225	0.0818076	0.0775206	0.0776037	0.0783165	0.0779724	0.203257	0.455993	0.669545	0.862888	0.997705	0.9953	0.864388	0.72668
0.0516502	0.0619075	0.0728734	0.0924932	0.13614	0.181443	0.225937	0.227889	0.227051	0.222067	0.229161	0.241541	0.263655	0.275574	0.278815	0.266998	0.255102	0.245562	0.223509	0.197879	0.203113	0.214477	0.233336	0.264964	0.288876	0.272228	0.253579	0.233525	0.22439	0.217404	0.213699	0.215652	0.217792	0.206871	0.200931	0.199788	0.179808	0.162573	0.159512	0.137255	0.104145	0.0983788	0.0825172	0.0515875	0.0640088	0.089653	0.12242	0.144346	0.157066	0.150713
0.0569037	0.0524029	0.0483397	0.0457988	0.0437718	0.0427436	0.0443545	0.0473069	0.055136	0.0650141	0.0785379	0.0878298	0.0951872	0.096626	0.0966824	0.094281	0.0967678	0.101368	0.106769	0.11217	0.118322	0.123214	0.120637	0.114632	0.1052	0.0929731	0.0807121	0.0714874	0.0652257	0.0619245	0.0629888	0.0649588	0.0672775	0.0696202	0.071987	0.0726555	0.0731914	0.0745897	0.0747121	0.0736585	0.073295	0.0730457	0.072805	0.0725643	0.0728179	0.0736939	0.0759965	0.0757229	0.0740039	0.075989
0.0343687	0.0381338	0.0401275	0.0445355	0.0515054	0.0571438	0.0626942	0.068646	0.0660859	0.0585128	0.0543391	0.0496784	0.0442761	0.0388739	0.0413043	0.0464713	0.053846	0.0568202	0.0553695	0.0540745	0.0513755	0.0445806	0.0469556	0.0541424	0.0551507	0.0520965	0.0434415	0.0407068	0.0404011	0.0446568	0.0516749	0.0610442	0.0564251	0.0584912	0.0775405	0.089155	0.0975833	0.106012	0.116041	0.108945	0.0731157	0.0594364	0.0534176	0.0526898	0.0577299	0.0682807	0.0732793	0.072452	0.057099	0.0515341
0.0686187	0.098615	0.137602	0.183263	0.278997	0.37473	0.440997	0.507223	0.530669	0.545907	0.529883	0.501642	0.471491	0.440062	0.408742	0.37916	0.349578	0.318197	0.286659	0.263686	0.243141	0.221328	0.198859	0.17562	0.151721	0.125286	0.0950374	0.0687867	0.0528484	0.0371952	0.0230453	0.0102581	0.0305221	0.0507861	0.0644533	0.0775312	0.0884664	0.0987874	0.103876	0.0923605	0.0820824	0.082993	0.0839035	0.0991101	0.114611	0.133763	0.153511	0.181197	0.211677	0.235723
0.0209598	0.0215211	0.0220825	0.0260411	0.0310104	0.0327159	0.0368222	0.0436751	0.0471843	0.0502364	0.0539334	0.051979	0.0463686	0.033202	0.0228263	0.0177795	0.0186133	0.0223404	0.0323911	0.0408404	0.0474517	0.0514073	0.0534029	0.0503166	0.0515743	0.0556093	0.0596443	0.0564424	0.0549927	0.0611559	0.0601389	0.0552069	0.0595659	0.0595209	0.0530222	0.0536067	0.0548276	0.0505899	0.0517087	0.0572996	0.0551333	0.0527613	0.0519301	0.0474374	0.0410688	0.0399912	0.0382983	0.0357084	0.0385094	0.04274
0.170152	0.140717	0.134709	0.130625	0.12916	0.127033	0.124717	0.119176	0.10535	0.0998256	0.0990814	0.0880344	0.0731962	0.0519906	0.0492324	0.0533134	0.0633756	0.0747169	0.087155	0.173338	0.26189	0.341391	0.401598	0.445688	0.359943	0.285748	0.227092	0.196146	0.175559	0.171068	0.166577	0.154243	0.135294	0.108258	0.0919367	0.0995895	0.103199	0.105695	0.114113	0.113754	0.103735	0.0944265	0.0905576	0.104688	0.108912	0.106743	0.105412	0.092109	0.0583573	0.0501088
0.0779724	0.203257	0.455993	0.669545	0.862888	0.997705	0.9953	0.864388	0.72668	0.57284	0.463102	0.378802	0.32378	0.274167	0.23474	0.205347	0.181205	0.160712	0.14249	0.128979	0.115387	0.101753	0.098723	0.0980141	0.101777	0.1067	0.112227	0.112399	0.110512	0.104608	0.102391	0.102101	0.110011	0.126904	0.159155	0.193817	0.222984	0.238824	0.240065	0.21808	0.190585	0.165597	0.145257	0.130438	0.125221	0.1229	0.123425	0.123187	0.122115	0.119745
0.477458	0.409208	0.344257	0.301372	0.270444	0.248355	0.23274	0.217386	0.20104	0.188866	0.179533	0.178352	0.178281	0.17979	0.186281	0.196161	0.206794	0.215296	0.218043	0.217582	0.214937	0.217132	0.21979	0.222782	0.217587	0.20727	0.191045	0.175766	0.163707	0.15617	0.151704	0.149803	0.148079	0.144336	0.139635	0.132881	0.12657	0.120993	0.115045	0.109119	0.108183	0.109951	0.116213	0.125379	0.135542	0.141505	0.14328	0.138086	0.134936	0.132464
0.086751	0.0826922	0.0751032	0.0674645	0.0604474	0.0537933	0.0473944	0.0410931	0.0356996	0.0327723	0.0309323	0.029795	0.0290517	0.0282518	0.0272366	0.0263199	0.0262229	0.0263739	0.0268313	0.0280931	0.0295785	0.03111	0.0323179	0.0331268	0.03248	0.0313659	0.0300397	0.0293284	0.0294403	0.0309438	0.0328853	0.0344088	0.036343	0.0388261	0.0430848	0.0480672	0.0543443	0.0587033	0.0604991	0.0613762	0.0599802	0.0579634	0.0555788	0.0531283	0.0507089	0.0483645	0.0473399	0.0470322	0.0503021	0.0530788
0.29923	0.329383	0.348346	0.363217	0.373364	0.380264	0.383285	0.381975	0.387571	0.405844	0.421213	0.426997	0.431965	0.430516	0.429067	0.411814	0.394443	0.380846	0.3679	0.361886	0.358401	0.353628	0.341725	0.329802	0.31729	0.304778	0.283608	0.261402	0.253451	0.249686	0.275503	0.317054	0.374015	0.444466	0.514673	0.584533	0.640547	0.663184	0.680165	0.670103	0.659926	0.646376	0.632826	0.633151	0.634792	0.643316	0.653857	0.650491	0.639742	0.608611
0.286926	0.235686	0.202682	0.172779	0.150765	0.133238	0.138891	0.144861	0.158069	0.171277	0.191026	0.216295	0.243859	0.274559	0.298034	0.304811	0.314271	0.339919	0.364594	0.346414	0.328234	0.326028	0.325554	0.303626	0.275731	0.280481	0.301868	0.31743	0.328073	0.332146	0.327235	0.315482	0.287943	0.263554	0.253299	0.243446	0.242614	0.241781	0.254171	0.26767	0.256738	0.23821	0.224125	0.212733	0.19271	0.164146	0.147074	0.148533	0.149969	0.151342
0.0473749	0.0445145	0.0428258	0.0427765	0.0474781	0.0557521	0.0580116	0.0595627	0.0602233	0.060884	0.0622164	0.0634149	0.0615733	0.0621201	0.0652093	0.0617555	0.0606384	0.0692258	0.0733603	0.0748887	0.0835782	0.0862395	0.0793901	0.081438	0.0850662	0.0791658	0.0785323	0.0831323	0.0846521	0.0941359	0.12641	0.152644	0.175448	0.198724	0.282112	0.334714	0.340359	0.368348	0.386661	0.331052	0.280175	0.233055	0.178123	0.131234	0.102939	0.096192	0.100174	0.125019	0.143993	0.156102
0.23956	0.234579	0.229376	0.211484	0.193592	0.174593	0.155468	0.140653	0.127214	0.113783	0.100358	0.0935983	0.0935569	0.0980905	0.110821	0.125638	0.147124	0.169592	0.201118	0.232643	0.257324	0.281855	0.265543	0.241348	0.22154	0.203453	0.186198	0.169501	0.160871	0.161771	0.157338	0.141497	0.127763	0.122531	0.117475	0.11525	0.113026	0.123832	0.135491	0.145553	0.155213	0.17075	0.190229	0.199348	0.197197	0.19966	0.210367	0.217354	0.212452	0.208473
0.118934	0.121286	0.12778	0.138614	0.148243	0.155097	0.147466	0.134149	0.114373	0.0835256	0.053283	0.0415724	0.0297963	0.0179517	0.0125337	0.00686078	-0.00792499	-0.0157414	-0.0162575	-0.0140939	-0.0104701	-0.00165216	0.00701271	0.012629	0.0184514	0.0246004	0.0301111	0.0350654	0.0343067	0.0425283	0.064867	0.101617	0.145199	0.208597	0.259428	0.292084	0.297959	0.293805	0.278825	0.256402	0.224066	0.192126	0.160891	0.135683	0.117977	0.110257	0.101324	0.0883085	0.0729381	0.0556311
NaN	NaN	NaN	NaN	NaN	NaN	NaN	NaN	NaN	NaN	NaN	NaN	NaN	NaN	NaN	NaN	NaN	NaN	NaN	NaN	NaN	NaN	NaN	0.151566	0.156071	0.160576	0.197885	0.23896	0.25467	0.263125	0.270318	0.276854	0.28339	0.260707	0.221401	0.201948	0.202539	0.205542	0.212517	0.220437	0.231078	0.23956	0.234579	0.229376	0.211484	0.193592	0.174593	0.155468	0.140653	0.127214
0.210202	0.24537	0.293948	0.320764	0.340733	0.39303	0.436365	0.465939	0.492715	0.515385	0.484292	0.44631	0.397761	0.354169	0.314826	0.318024	0.329908	0.355116	0.390172	0.427421	0.447691	0.46796	0.490936	0.501723	0.47192	0.44143	0.410433	0.419424	0.436661	0.467094	0.475962	0.470113	0.451167	0.433013	0.419358	0.425718	0.444619	0.419601	0.384743	0.331299	0.272536	0.210715	0.190884	0.17668	0.171181	0.16111	0.148406	0.129613	0.114507	0.107761
0.0616801	0.062161	0.0585103	0.0553414	0.0556713	0.0550223	0.0537504	0.0514617	0.048528	0.044467	0.0466928	0.0505559	0.0519177	0.0568184	0.0650733	0.0713817	0.0777456	0.0849879	0.0876876	0.0877047	0.0762159	0.0672653	0.0621126	0.0562544	0.051179	0.0510989	0.0482734	0.0432593	0.0502261	0.0558208	0.0573083	0.0601047	0.0626773	0.0559625	0.0491586	0.042245	0.0388791	0.0361193	0.0322766	0.0351094	0.0434975	0.047746	0.0565761	0.0752833	0.0898151	0.101877	0.107247	0.106419	0.0995262	0.0954734
0.0556093	0.0596443	0.0564424	0.0549927	0.0611559	0.0601389	0.0552069	0.0595659	0.0595209	0.0530222	0.0536067	0.0548276	0.0505899	0.0517087	0.0572996	0.0551333	0.0527613	0.0519301	0.0474374	0.0410688	0.0399912	0.0382983	0.0357084	0.0385094	0.04274	0.0469582	0.0509981	0.0570395	0.0655192	0.0670586	0.0661732	0.0616029	0.0547101	0.0460809	0.0417754	0.0407626	0.046257	0.0508157	0.0549821	0.0591986	0.0598502	0.0566058	0.0620654	0.0706106	0.0841548	0.0884282	0.0869127	0.0857874	0.0846647	0.080999
0.265682	0.307336	0.36002	0.422895	0.49893	0.594723	0.672951	0.705928	0.734203	0.733549	0.732895	0.711221	0.689547	0.655306	0.619015	0.58493	0.551702	0.519002	0.486685	0.454068	0.42107	0.393791	0.378666	0.358665	0.319182	0.279219	0.233744	0.18827	0.157685	0.127718	0.121511	0.119822	0.121282	0.123966	0.115314	0.0984679	0.0808012	0.0621736	0.0492869	0.0475144	0.0500392	0.0697107	0.0893907	0.109168	0.128946	0.157164	0.185727	0.211446	0.236543	0.25951
0.0305722	0.0470569	0.0607692	0.0729806	0.0823904	0.0830451	0.0727541	0.062463	0.0550819	0.0485557	0.0410213	0.0342974	0.0283579	0.0259872	0.0261521	0.0330631	0.0391857	0.0448169	0.0475985	0.0491117	0.0486243	0.0555758	0.0632425	0.062041	0.0616801	0.062161	0.0585103	0.0553414	0.0556713	0.0550223	0.0537504	0.0514617	0.048528	0.044467	0.0466928	0.0505559	0.0519177	0.0568184	0.0650733	0.0713817	0.0777456	0.0849879	0.0876876	0.0877047	0.0762159	0.0672653	0.0621126	0.0562544	0.051179	0.0510989
0.515484	0.500004	0.39771	0.304704	0.242498	0.196225	0.158984	0.140571	0.124571	0.112843	0.10639	0.102672	0.0987678	0.0950393	0.0916554	0.0862258	0.0798254	0.074021	0.0691212	0.0659866	0.0648348	0.0645787	0.0619863	0.0597804	0.0582663	0.0576673	0.0575776	0.0603363	0.062903	0.0651543	0.0669064	0.068537	0.0720177	0.0760496	0.0810665	0.0844709	0.086961	0.0840188	0.0792825	0.0713347	0.0642217	0.0576491	0.0555072	0.0546209	0.0559784	0.0556554	0.0546309	0.0541916	0.0534576	0.0522397
0.0697107	0.0893907	0.109168	0.128946	0.157164	0.185727	0.211446	0.236543	0.25951	0.281567	0.285983	0.276561	0.274907	0.283113	0.283361	0.266726	0.249323	0.228863	0.206501	0.16257	0.118639	0.108842	0.100431	0.0920193	0.0776427	0.0613927	0.0630033	0.0755143	0.0884744	0.101919	0.122115	0.154251	0.181405	0.192883	0.204542	0.217811	0.231079	0.23307	0.234845	0.228236	0.220272	0.210154	0.199205	0.184328	0.166384	0.151337	0.139956	0.128575	0.117465	0.106386
0.199666	0.202061	0.199657	0.196084	0.18352	0.166763	0.161003	0.16443	0.160468	0.146508	0.134412	0.126565	0.117522	0.101428	0.0853768	0.0709517	0.0565266	0.0509913	0.0466111	0.0357825	0.0227492	0.0323418	0.0554984	0.0721439	0.0824071	0.0926703	0.116707	0.140954	0.139956	0.135017	0.130489	0.126102	0.109683	0.0860578	0.0683925	0.0565644	0.0445894	0.0323356	0.022566	0.0213332	0.0204079	0.0227669	0.0251258	0.0286961	0.0323096	0.0427868	0.0545173	0.0671316	0.0801146	0.0960818
0.0668624	0.057214	0.0454104	0.0307	0.0228837	0.0200966	0.0215724	0.0246091	0.0302631	0.0358784	0.0415301	0.0477509	0.0498964	0.0474796	0.048288	0.0486988	0.0454598	0.0508567	0.0623549	0.0590586	0.0560889	0.0551583	0.0484717	0.0400575	0.036197	0.0310927	0.0246999	0.021156	0.0219863	0.035207	0.0442597	0.0508603	0.0578448	0.0621544	0.0621254	0.0682824	0.0764997	0.085389	0.0931087	0.0997853	0.0997163	0.0968741	0.088964	0.0825673	0.0771827	0.0791877	0.0811927	0.0946964	0.11798	0.125469
0.0499163	0.0410427	0.0441475	0.0503315	0.0609308	0.0740765	0.0876862	0.0912925	0.131266	0.214626	0.284836	0.35188	0.418284	0.480181	0.478228	0.41498	0.327759	0.251207	0.211985	0.187678	0.172058	0.163726	0.153243	0.139219	0.128066	0.119227	0.118346	0.119967	0.123743	0.131536	0.140546	0.15188	0.157245	0.159225	0.152446	0.144938	0.136427	0.175195	0.229368	0.294918	0.35057	0.397952	0.377674	0.346431	0.301623	0.266435	0.236743	0.220162	0.204397	0.189611
0.0716252	0.0797796	0.0802671	0.0806802	0.0731481	0.0642184	0.0610805	0.0600826	0.062001	0.078097	0.095303	0.133338	0.171373	0.26718	0.368646	0.421045	0.460464	0.484433	0.50082	0.483224	0.437891	0.414065	0.418657	0.43156	0.46289	0.491457	0.506628	0.520301	0.506074	0.491848	0.461288	0.42952	0.401052	0.379256	0.367595	0.393828	0.417613	0.416996	0.41638	0.426493	0.436928	0.41918	0.395717	0.374393	0.353938	0.330606	0.304931	0.276355	0.243953	0.21978
0.0230453	0.0102581	0.0305221	0.0507861	0.0644533	0.0775312	0.0884664	0.0987874	0.103876	0.0923605	0.0820824	0.082993	0.0839035	0.0991101	0.114611	0.133763	0.153511	0.181197	0.211677	0.235723	0.255476	0.289258	0.338276	0.384813	0.426079	0.457153	0.447358	0.435297	0.368834	0.302372	0.220139	0.136531	0.0961263	0.0665898	0.0578214	0.0588263	0.0669986	0.0807978	0.0986527	0.121669	0.140498	0.150436	0.158717	0.160378	0.162477	0.169605	0.176732	0.182108	0.187374	0.193205
0.225777	0.171303	0.144741	0.128156	0.128432	0.139363	0.154084	0.15691	0.160778	0.166014	0.156857	0.147758	0.154971	0.142087	0.112879	0.124801	0.130544	0.118546	0.130523	0.14788	0.131829	0.1278	0.137037	0.146274	0.146774	0.156121	0.212409	0.235824	0.232691	0.237714	0.227064	0.176621	0.163415	0.167002	0.161156	0.157279	0.156001	0.143887	0.133952	0.143824	0.180598	0.238118	0.296076	0.380826	0.521262	0.632724	0.732155	0.831586	0.932669	0.955024
0.130438	0.125221	0.1229	0.123425	0.123187	0.122115	0.119745	0.116839	0.11238	0.106286	0.0983987	0.0927297	0.0875561	0.0845543	0.0826502	0.0843694	0.0862499	0.0884203	0.0880912	0.0868034	0.0887384	0.0899895	0.0901123	0.0890289	0.0874315	0.0851849	0.0816877	0.0761293	0.0704303	0.0647082	0.0595129	0.0576637	0.0608842	0.0630217	0.0647175	0.0657427	0.0667679	0.064303	0.0612084	0.057882	0.0551897	0.0530881	0.0509815	0.0493239	0.0497478	0.0506654	0.0520426	0.0556164	0.0596267	0.0636916
0.0775618	0.0716517	0.0675728	0.0660042	0.0636004	0.061214	0.0612847	0.0606214	0.0590322	0.0607616	0.0634161	0.0663282	0.0693968	0.0716115	0.0730491	0.0727689	0.0713548	0.069309	0.0669658	0.0643425	0.0610364	0.0602	0.0608632	0.0619633	0.0624206	0.0613556	0.05808	0.053461	0.0489973	0.0458366	0.0456735	0.0461092	0.0468784	0.0484906	0.050136	0.0539682	0.0586534	0.065305	0.0708063	0.0750732	0.0780108	0.0805169	0.0822799	0.0857455	0.0910366	0.0962009	0.101	0.104055	0.104775	0.103184
0.130028	0.123164	0.109362	0.102469	0.0985587	0.0730178	0.0511663	0.0345933	0.0396938	0.0520297	0.0719715	0.101091	0.137044	0.138182	0.132573	0.117574	0.0962153	0.0754187	0.0808916	0.0879425	0.0966176	0.105049	0.111153	0.109879	0.128171	0.159802	0.194702	0.217082	0.218474	0.288917	0.365355	0.349749	0.347474	0.357496	0.357523	0.260982	0.203922	0.191345	0.168633	0.144489	0.122948	0.103564	0.085619	0.0751245	0.065708	0.057938	0.0588461	0.06259	0.0661537	0.0790464
0.0704951	0.0604972	0.0527193	0.0515613	0.0583162	0.0697407	0.0719328	0.0743271	0.077067	0.0646008	0.0484356	0.040324	0.036187	0.0357603	0.0378794	0.0400538	0.0416471	0.0415565	0.0407632	0.0426197	0.0442209	0.0454872	0.0430884	0.0392645	0.033133	0.029154	0.0267816	0.0309689	0.0365359	0.0441435	0.0475853	0.048789	0.0444011	0.0400132	0.0392806	0.0407807	0.0502236	0.0594806	0.0684966	0.0713948	0.0738004	0.0801898	0.0831157	0.0832714	0.0861015	0.082791	0.0665094	0.0625156	0.0643611	0.0755137
0.030532	0.0225781	0.0230424	0.0234127	0.02279	0.0221672	0.019076	0.0158465	0.0181924	0.0217047	0.022941	0.023234	0.0250076	0.0279117	0.0321023	0.0380176	0.0439329	0.0754837	0.110287	0.199583	0.305415	0.424783	0.55219	0.635269	0.67169	0.669524	0.600916	0.521338	0.404488	0.293379	0.230088	0.166798	0.133626	0.101468	0.0810021	0.0629716	0.0518275	0.043529	0.0392767	0.0378641	0.0363611	0.033914	0.031467	0.0311639	0.0309321	0.0363999	0.0430534	0.0497547	0.0564759	0.0711883
0.266894	0.31898	0.353483	0.379145	0.37521	0.34456	0.311345	0.274385	0.244217	0.230988	0.21971	0.219815	0.21981	0.215689	0.211568	0.209982	0.208659	0.194356	0.176097	0.167275	0.164082	0.16374	0.166406	0.169085	0.171788	0.174491	0.171343	0.164712	0.18317	0.226083	0.260345	0.280881	0.301539	0.32253	0.335963	0.297153	0.258344	0.236635	0.215153	0.203852	0.194116	0.172513	0.146446	0.125933	0.109019	0.0941462	0.081424	0.0704597	0.0625299	0.0546001
0.0363999	0.0430534	0.0497547	0.0564759	0.0711883	0.0915092	0.11108	0.129797	0.15058	0.175238	0.196086	0.20403	0.209196	0.191474	0.173751	0.15218	0.130561	0.107954	0.0851957	0.0678519	0.0626607	0.0585627	0.0591798	0.0606036	0.0779559	0.0953082	0.123539	0.152608	0.182989	0.213682	0.243542	0.272989	0.286084	0.284584	0.276832	0.260025	0.24552	0.236689	0.226122	0.206985	0.188018	0.174784	0.161549	0.137846	0.104799	0.079994	0.0671092	0.0552198	0.0457819	0.0368902
0.352688	0.362725	0.364852	0.36698	0.375742	0.385374	0.372235	0.351261	0.325793	0.29738	0.265647	0.230366	0.207055	0.204801	0.207733	0.226696	0.250209	0.305747	0.361239	0.406503	0.451767	0.468453	0.481403	0.450021	0.404974	0.367058	0.333083	0.299108	0.274313	0.253748	0.233088	0.212354	0.196523	0.186822	0.177885	0.170691	0.162097	0.146413	0.130467	0.108948	0.0874282	0.0799989	0.0737187	0.0840622	0.0995181	0.110267	0.118422	0.117412	0.108104	0.0985457
0.229044	0.239608	0.251384	0.263833	0.271573	0.275021	0.278379	0.277901	0.277424	0.291603	0.30772	0.328795	0.351409	0.395921	0.452591	0.47872	0.474696	0.457053	0.415533	0.369744	0.310685	0.253317	0.210574	0.167831	0.148593	0.129755	0.113941	0.0986879	0.103307	0.115518	0.125498	0.128553	0.132406	0.143217	0.154027	0.143056	0.131726	0.124834	0.118642	0.114579	0.111251	0.127449	0.155423	0.190136	0.231483	0.265022	0.286023	0.306423	0.325143	0.342621
0.0775695	0.0781764	0.0758376	0.0743147	0.0727918	0.0706392	0.0658192	0.061478	0.0575113	0.0636958	0.0650967	0.0558862	0.0482802	0.0418701	0.0415631	0.0402542	0.0378182	0.0515131	0.0628061	0.0587152	0.0677493	0.0846183	0.0840447	0.0845498	0.0876821	0.0867301	0.0842079	0.0817178	0.0792278	0.0796392	0.0870991	0.0931657	0.0991407	0.115039	0.128514	0.138827	0.135543	0.132585	0.145174	0.150507	0.150446	0.149922	0.138763	0.107376	0.0916306	0.0834224	0.0912215	0.0971196	0.100592	0.103504
0.105714	0.124375	0.136796	0.146995	0.15116	0.151259	0.148508	0.142374	0.135823	0.128451	0.122889	0.123833	0.124777	0.123496	0.121057	0.134944	0.162863	0.19306	0.226434	0.251561	0.257246	0.262778	0.267601	0.275869	0.372302	0.468736	0.546367	0.622309	0.670924	0.711732	0.672101	0.590587	0.525174	0.474755	0.429167	0.390894	0.36396	0.366447	0.371968	0.396404	0.422127	0.517984	0.613841	0.68254	0.748153	0.774052	0.788619	0.775565	0.748153	0.721203
0.358665	0.319182	0.279219	0.233744	0.18827	0.157685	0.127718	0.121511	0.119822	0.121282	0.123966	0.115314	0.0984679	0.0808012	0.0621736	0.0492869	0.0475144	0.0500392	0.0697107	0.0893907	0.109168	0.128946	0.157164	0.185727	0.211446	0.236543	0.25951	0.281567	0.285983	0.276561	0.274907	0.283113	0.283361	0.266726	0.249323	0.228863	0.206501	0.16257	0.118639	0.108842	0.100431	0.0920193	0.0776427	0.0613927	0.0630033	0.0755143	0.0884744	0.101919	0.122115	0.154251
0.0169042	0.0217271	0.0245287	0.0272566	0.0372617	0.0485995	0.0564615	0.0630077	0.0725069	0.0839309	0.0948666	0.0955838	0.0963011	0.0981714	0.100134	0.0902119	0.0774175	0.0687794	0.062049	0.0513001	0.0374649	0.0446422	0.0779627	0.112237	0.14849	0.185647	0.226778	0.264317	0.250537	0.236757	0.224765	0.212877	0.193761	0.173122	0.157145	0.143111	0.13627	0.134944	0.136426	0.141693	0.153318	0.17936	0.205622	0.232841	0.263087	0.336168	0.409249	0.484434	0.559739	0.599317
0.217582	0.214937	0.217132	0.21979	0.222782	0.217587	0.20727	0.191045	0.175766	0.163707	0.15617	0.151704	0.149803	0.148079	0.144336	0.139635	0.132881	0.12657	0.120993	0.115045	0.109119	0.108183	0.109951	0.116213	0.125379	0.135542	0.141505	0.14328	0.138086	0.134936	0.132464	0.127738	0.12248	0.116338	0.105975	0.0942124	0.0871412	0.08007	0.075595	0.0728588	0.0744822	0.0767482	0.0794505	0.0855339	0.0922707	0.100113	0.112391	0.127676	0.151351	0.17236
0.40643	0.429643	0.437911	0.446182	0.45447	0.447529	0.426563	0.396028	0.361944	0.319903	0.261324	0.188691	0.147278	0.114306	0.0961417	0.0856387	0.0811407	0.0695065	0.0607493	0.0635588	0.074737	0.0919603	0.10557	0.11735	0.124345	0.127198	0.127062	0.140612	0.173003	0.229984	0.293936	0.351035	0.402215	0.445255	0.450487	0.441872	0.426209	0.40088	0.362247	0.327696	0.293864	0.253647	0.219297	0.193017	0.160594	0.129539	0.127798	0.138934	0.167779	0.191288
0.451167	0.433013	0.419358	0.425718	0.444619	0.419601	0.384743	0.331299	0.272536	0.210715	0.190884	0.17668	0.171181	0.16111	0.148406	0.129613	0.114507	0.107761	0.112067	0.122194	0.130562	0.141958	0.159378	0.169935	0.177044	0.175187	0.170345	0.159583	0.16703	0.1834	0.209283	0.229015	0.236549	0.225683	0.205948	0.1805	0.157085	0.138153	0.134	0.137667	0.16169	0.184988	0.206617	0.209483	0.20333	0.189985	0.179457	0.174581	0.176653	0.182066
0.359943	0.285748	0.227092	0.196146	0.175559	0.171068	0.166577	0.154243	0.135294	0.108258	0.0919367	0.0995895	0.103199	0.105695	0.114113	0.113754	0.103735	0.0944265	0.0905576	0.104688	0.108912	0.106743	0.105412	0.092109	0.0583573	0.0501088	0.0526737	0.0699552	0.0805415	0.0847209	0.0799074	0.0708547	0.0523111	0.0487182	0.0544766	0.0600303	0.0648285	0.0684318	0.0738848	0.0798886	0.0858663	0.0904089	0.0936718	0.0892386	0.0810785	0.0658951	0.0814151	0.110855	0.119287	0.124478
NaN	NaN	NaN	NaN	NaN	NaN	NaN	NaN	NaN	NaN	NaN	NaN	NaN	NaN	NaN	NaN	NaN	NaN	NaN	NaN	NaN	NaN	NaN	NaN	NaN	NaN	NaN	NaN	NaN	NaN	NaN	NaN	NaN	NaN	NaN	NaN	NaN	NaN	NaN	NaN	NaN	NaN	NaN	NaN	NaN	NaN	NaN	NaN	NaN	NaN
0.0821129	0.0772982	0.0737605	0.0706736	0.0673642	0.0640975	0.060897	0.0575209	0.0540999	0.0511556	0.0486562	0.0468485	0.044	0.0408234	0.0383279	0.0353113	0.0314862	0.0288078	0.0266266	0.0254494	0.0243801	0.0234783	0.0226769	0.0222479	0.0215736	0.0207002	0.0208818	0.0208032	0.0194374	0.0184307	0.0176927	0.0186382	0.0199376	0.021805	0.0233586	0.0246961	0.0233074	0.0219761	0.0214019	0.0208309	0.0202621	0.0211934	0.0217242	0.0208946	0.0200382	0.0191635	0.0179597	0.0162018	0.0145838	0.0130581
0.14249	0.128979	0.115387	0.101753	0.098723	0.0980141	0.101777	0.1067	0.112227	0.112399	0.110512	0.104608	0.102391	0.102101	0.110011	0.126904	0.159155	0.193817	0.222984	0.238824	0.240065	0.21808	0.190585	0.165597	0.145257	0.130438	0.125221	0.1229	0.123425	0.123187	0.122115	0.119745	0.116839	0.11238	0.106286	0.0983987	0.0927297	0.0875561	0.0845543	0.0826502	0.0843694	0.0862499	0.0884203	0.0880912	0.0868034	0.0887384	0.0899895	0.0901123	0.0890289	0.0874315
0.261324	0.188691	0.147278	0.114306	0.0961417	0.0856387	0.0811407	0.0695065	0.0607493	0.0635588	0.074737	0.0919603	0.10557	0.11735	0.124345	0.127198	0.127062	0.140612	0.173003	0.229984	0.293936	0.351035	0.402215	0.445255	0.450487	0.441872	0.426209	0.40088	0.362247	0.327696	0.293864	0.253647	0.219297	0.193017	0.160594	0.129539	0.127798	0.138934	0.167779	0.191288	0.211264	0.21472	0.202238	0.169573	0.143766	0.121396	0.112475	0.100566	0.0848725	0.0774258
0.24227	0.223662	0.217888	0.210419	0.186774	0.160482	0.131685	0.102537	0.0761598	0.0615504	0.0525287	0.0483832	0.046191	0.0467116	0.0571127	0.0690725	0.0823913	0.09631	0.110315	0.143556	0.183052	0.210202	0.24537	0.293948	0.320764	0.340733	0.39303	0.436365	0.465939	0.492715	0.515385	0.484292	0.44631	0.397761	0.354169	0.314826	0.318024	0.329908	0.355116	0.390172	0.427421	0.447691	0.46796	0.490936	0.501723	0.47192	0.44143	0.410433	0.419424	0.436661
0.048789	0.0444011	0.0400132	0.0392806	0.0407807	0.0502236	0.0594806	0.0684966	0.0713948	0.0738004	0.0801898	0.0831157	0.0832714	0.0861015	0.082791	0.0665094	0.0625156	0.0643611	0.0755137	0.102906	0.148685	0.29216	0.449303	0.596424	0.693746	0.756577	0.664227	0.557654	0.431688	0.338874	0.264076	0.232254	0.204074	0.179471	0.165951	0.155098	0.147681	0.140931	0.134514	0.11405	0.0952968	0.0794004	0.0687792	0.0610882	0.0607799	0.0620848	0.064841	0.0693088	0.0733628	0.07596
0.0675737	0.062599	0.058055	0.0542485	0.0542502	0.0584109	0.0610168	0.0636033	0.0668382	0.0679237	0.0676897	0.0632236	0.0600544	0.0590015	0.058212	0.0585485	0.0664036	0.0710319	0.0725526	0.0779802	0.0804801	0.0744198	0.0711707	0.0690252	0.0611027	0.0538176	0.0473749	0.0445145	0.0428258	0.0427765	0.0474781	0.0557521	0.0580116	0.0595627	0.0602233	0.060884	0.0622164	0.0634149	0.0615733	0.0621201	0.0652093	0.0617555	0.0606384	0.0692258	0.0733603	0.0748887	0.0835782	0.0862395	0.0793901	0.081438
0.0715429	0.109066	0.152954	0.20285	0.229775	0.271261	0.358651	0.469299	0.589609	0.61941	0.602811	0.516669	0.37695	0.234952	0.171682	0.122645	0.0857627	0.0852733	0.0960492	0.125275	0.147544	0.16635	0.180427	0.187397	0.183781	0.165841	0.155894	0.201601	0.250528	0.30199	0.344828	0.363811	0.335505	0.337188	0.34781	0.333203	0.307661	0.270602	0.25082	0.242713	0.262758	0.257332	0.236415	0.19627	0.156125	0.112322	0.0650928	0.0523166	0.0484644	0.0595337
0.541005	0.673918	0.78884	0.868461	0.90924	0.792292	0.675264	0.557275	0.439286	0.36192	0.286343	0.238012	0.194956	0.164938	0.140056	0.122552	0.110014	0.0974748	0.0853507	0.0732361	0.070054	0.0683502	0.0711	0.0755991	0.0838204	0.0945482	0.103396	0.110191	0.114576	0.11464	0.113694	0.109128	0.104371	0.0973539	0.0903372	0.0844955	0.0787048	0.0786092	0.0796129	0.0838318	0.0893122	0.0945641	0.0987634	0.103858	0.123441	0.143023	0.160932	0.178731	0.198098	0.217862
0.0846647	0.080999	0.0695893	0.0707854	0.0797274	0.0776302	0.0766289	0.0774799	0.075546	0.0728364	0.0720336	0.0668434	0.0568467	0.0504343	0.0470483	0.0510083	0.057314	0.0650093	0.064735	0.0633489	0.0601252	0.0597399	0.0607406	0.0649285	0.0691163	0.0700634	0.0668624	0.057214	0.0454104	0.0307	0.0228837	0.0200966	0.0215724	0.0246091	0.0302631	0.0358784	0.0415301	0.0477509	0.0498964	0.0474796	0.048288	0.0486988	0.0454598	0.0508567	0.0623549	0.0590586	0.0560889	0.0551583	0.0484717	0.0400575
0.163707	0.15617	0.151704	0.149803	0.148079	0.144336	0.139635	0.132881	0.12657	0.120993	0.115045	0.109119	0.108183	0.109951	0.116213	0.125379	0.135542	0.141505	0.14328	0.138086	0.134936	0.132464	0.127738	0.12248	0.116338	0.105975	0.0942124	0.0871412	0.08007	0.075595	0.0728588	0.0744822	0.0767482	0.0794505	0.0855339	0.0922707	0.100113	0.112391	0.127676	0.151351	0.17236	0.184854	0.192184	0.196014	0.186844	0.177056	0.167979	0.157552	0.146285	0.138591
0.484292	0.44631	0.397761	0.354169	0.314826	0.318024	0.329908	0.355116	0.390172	0.427421	0.447691	0.46796	0.490936	0.501723	0.47192	0.44143	0.410433	0.419424	0.436661	0.467094	0.475962	0.470113	0.451167	0.433013	0.419358	0.425718	0.444619	0.419601	0.384743	0.331299	0.272536	0.210715	0.190884	0.17668	0.171181	0.16111	0.148406	0.129613	0.114507	0.107761	0.112067	0.122194	0.130562	0.141958	0.159378	0.169935	0.177044	0.175187	0.170345	0.159583
0.0884623	0.0784001	0.0694477	0.0661034	0.0574582	0.0443912	0.0477353	0.0504496	0.0472201	0.0532928	0.0643665	0.0757883	0.0949608	0.124534	0.130037	0.12934	0.125678	0.109836	0.0842122	0.0844125	0.0848135	0.0810686	0.0757613	0.0698137	0.0680018	0.0661899	0.0670633	0.0727857	0.0738709	0.0721126	0.06173	0.0500341	0.0370956	0.0275879	0.0191592	0.0124956	0.00410219	-0.00510167	-0.0107261	-0.0148788	-0.0167471	-0.0123684	-0.006068	-0.000258189	0.00638301	0.0138313	0.0173315	0.0202695	0.0229449	0.0256203
0.804583	0.876828	0.836809	0.782058	0.724971	0.667079	0.622252	0.585292	0.563718	0.558549	0.550938	0.539061	0.526358	0.511102	0.494181	0.46555	0.436953	0.416102	0.395251	0.399902	0.40788	0.414379	0.420423	0.43121	0.444613	0.457529	0.459951	0.462372	0.47193	0.482069	0.47995	0.474854	0.560905	0.688909	0.790297	0.871176	0.93863	0.987903	0.988637	0.87866	0.770606	0.671031	0.572868	0.495158	0.417448	0.365606	0.31527	0.295433	0.282064	0.272426
0.0437025	0.0471884	0.0529265	0.0638868	0.0785798	0.0956815	0.100326	0.105725	0.113351	0.121081	0.127566	0.12543	0.124985	0.126129	0.114975	0.106629	0.108539	0.11243	0.116653	0.104212	0.0924483	0.0816529	0.0758111	0.0713895	0.0761367	0.0845201	0.0857606	0.0877545	0.0907268	0.102311	0.116743	0.134527	0.135085	0.123593	0.104324	0.0897764	0.0848033	0.0882964	0.0943017	0.0916509	0.0848233	0.0735746	0.0637904	0.0571491	0.0588455	0.0611876	0.0639063	0.0680664	0.0776063	0.096895
0.318078	0.301518	0.37482	0.448122	0.458464	0.461025	0.442319	0.417269	0.34982	0.257491	0.184894	0.132818	0.0936457	0.0764272	0.0631101	0.0628246	0.0634709	0.0716252	0.0797796	0.0802671	0.0806802	0.0731481	0.0642184	0.0610805	0.0600826	0.062001	0.078097	0.095303	0.133338	0.171373	0.26718	0.368646	0.421045	0.460464	0.484433	0.50082	0.483224	0.437891	0.414065	0.418657	0.43156	0.46289	0.491457	0.506628	0.520301	0.506074	0.491848	0.461288	0.42952	0.401052
NaN	NaN	NaN	NaN	NaN	NaN	NaN	NaN	NaN	NaN	NaN	NaN	NaN	NaN	NaN	NaN	NaN	NaN	NaN	NaN	NaN	NaN	NaN	NaN	NaN	NaN	NaN	NaN	NaN	NaN	NaN	NaN	NaN	NaN	NaN	0.960317	0.941173	0.922029	0.902526	0.870345	0.838165	0.760046	0.677195	0.626815	0.585191	0.543568	0.468731	0.390522	0.335859	0.287538
0.664227	0.557654	0.431688	0.338874	0.264076	0.232254	0.204074	0.179471	0.165951	0.155098	0.147681	0.140931	0.134514	0.11405	0.0952968	0.0794004	0.0687792	0.0610882	0.0607799	0.0620848	0.064841	0.0693088	0.0733628	0.07596	0.0785572	0.0759018	0.0714152	0.0638395	0.0558053	0.0481555	0.050418	0.0551456	0.0630106	0.0599477	0.0560679	0.0591717	0.0596148	0.0581121	0.0708574	0.0841684	0.0976253	0.110764	0.123988	0.138992	0.169582	0.216187	0.263374	0.323481	0.42033	0.447892
0.390172	0.427421	0.447691	0.46796	0.490936	0.501723	0.47192	0.44143	0.410433	0.419424	0.436661	0.467094	0.475962	0.470113	0.451167	0.433013	0.419358	0.425718	0.444619	0.419601	0.384743	0.331299	0.272536	0.210715	0.190884	0.17668	0.171181	0.16111	0.148406	0.129613	0.114507	0.107761	0.112067	0.122194	0.130562	0.141958	0.159378	0.169935	0.177044	0.175187	0.170345	0.159583	0.16703	0.1834	0.209283	0.229015	0.236549	0.225683	0.205948	0.1805
[truncated: 131 more columns]

## Sheet: Fig 4-AIB abl
Time relative to onset of a forward run (s)
-20	-19.5	-19	-18.5	-18	-17.5	-17	-16.5	-16	-15.5	-15	-14.5	-14	-13.5	-13	-12.5	-12	-11.5	-11	-10.5	-10	-9.5	-9	-8.5	-8	-7.5	-7	-6.5	-6	-5.5	-5	-4.5	-4	-3.5	-3	-2.5	-2	-1.5	-1	-0.5	0	0.5	1	1.5	2	2.5	3	3.5	4	4.5
Calcium activity in AIY (dR/R0)
0.0977181	0.0977124	0.097657	0.0996436	0.105784	0.112137	0.117886	0.120904	0.123959	0.126437	0.129986	0.137861	0.144326	0.148163	0.146699	0.146924	0.148413	0.151834	0.163816	0.179624	0.196662	0.211093	0.221443	0.229622	0.231043	0.236456	0.245691	0.252628	0.265004	0.27873	0.288446	0.297219	0.299759	0.292419	0.288711	0.285341	0.282432	0.295649	0.310875	0.325923	0.353945	0.376558	0.393398	0.398722	0.409516	0.423363	0.436958	0.438595	0.434187	0.420327
0.505619	0.453874	0.416396	0.38923	0.363763	0.338108	0.312218	0.291347	0.273923	0.262514	0.258818	0.258572	0.262168	0.268398	0.276792	0.297484	0.325134	0.360643	0.410006	0.461004	0.512999	0.553036	0.58514	0.601441	0.62029	0.639868	0.654997	0.676882	0.704339	0.679567	0.652137	0.621934	0.569869	0.521492	0.48886	0.470605	0.460451	0.464162	0.474925	0.488488	0.480409	0.470803	0.459692	0.436432	0.419783	0.414655	0.402434	0.389723	0.379762	0.36949
0.231391	0.225548	0.224728	0.234688	0.248621	0.256104	0.255141	0.247563	0.231863	0.218525	0.208292	0.197278	0.189274	0.187871	0.180813	0.172819	0.168252	0.162967	0.157269	0.156057	0.153259	0.148071	0.136726	0.122858	0.10544	0.0931182	0.0814336	0.0669643	0.0573943	0.0505676	0.0463347	0.047892	0.0543014	0.0652201	0.0795692	0.0981283	0.113629	0.128026	0.140958	0.152694	0.163876	0.174353	0.179148	0.180168	0.17564	0.169915	0.162973	0.165231	0.164497	0.158713
0.578473	0.550407	0.519569	0.4896	0.467361	0.452792	0.42606	0.399359	0.37427	0.343308	0.313398	0.29186	0.272183	0.253839	0.240028	0.225026	0.208377	0.20739	0.209697	0.213505	0.222112	0.230312	0.222516	0.212647	0.201311	0.190339	0.17997	0.170305	0.160711	0.150792	0.140193	0.139861	0.143816	0.152339	0.162628	0.172556	0.17276	0.183335	0.202513	0.248022	0.314039	0.427405	0.549144	0.669938	0.770675	0.861752	0.931961	0.970328	0.990459	0.983126
0.0628184	0.0567368	0.0500722	0.0425114	0.0402116	0.0406375	0.0454647	0.0662498	0.0901351	0.109905	0.12407	0.123321	0.114754	0.10376	0.099814	0.0981135	0.0978806	0.0997171	0.101218	0.10185	0.0999156	0.0972189	0.0945452	0.0917952	0.0891701	0.0889759	0.0883018	0.0907688	0.0988528	0.110107	0.121567	0.132684	0.137761	0.138604	0.134892	0.133808	0.132003	0.129752	0.133701	0.138393	0.143572	0.147172	0.169151	0.207435	0.252026	0.321538	0.406727	0.498273	0.569606	0.636955
0.0460534	0.0414492	0.0390735	0.0383039	0.0394228	0.0453634	0.0537066	0.0652508	0.0759732	0.0855275	0.0924893	0.103193	0.116408	0.136104	0.155292	0.174004	0.189489	0.201032	0.20666	0.212685	0.217213	0.213654	0.211793	0.21002	0.202492	0.20275	0.208537	0.212405	0.227898	0.259149	0.282111	0.305485	0.333917	0.347493	0.353995	0.355395	0.358385	0.362636	0.372789	0.388893	0.412135	0.463117	0.529565	0.619796	0.713317	0.800644	0.859447	0.894685	0.907122	0.890853
0.1257	0.137333	0.149954	0.160633	0.179072	0.195065	0.203021	0.208766	0.209177	0.20601	0.200738	0.192413	0.184471	0.176895	0.17057	0.170936	0.173168	0.177219	0.18375	0.191202	0.199016	0.210347	0.218609	0.224161	0.220899	0.215639	0.209885	0.210859	0.218219	0.234142	0.258933	0.277961	0.293118	0.305221	0.304941	0.296701	0.280966	0.269663	0.266727	0.278414	0.30628	0.350115	0.398457	0.449569	0.486652	0.514333	0.531607	0.543289	0.553126	0.562195
0.279644	0.281575	0.276106	0.25746	0.234922	0.217338	0.202237	0.190129	0.187622	0.191844	0.205786	0.223687	0.245713	0.270463	0.29228	0.304725	0.29973	0.287076	0.263427	0.245278	0.230702	0.22336	0.22041	0.220402	0.224697	0.229341	0.234348	0.236052	0.235972	0.233192	0.231038	0.228904	0.226246	0.231876	0.242037	0.254254	0.26971	0.288129	0.321597	0.349848	0.368865	0.388376	0.408068	0.445368	0.501094	0.594068	0.698607	0.797652	0.860722	0.88313
0.246743	0.23604	0.223228	0.212277	0.21165	0.216137	0.223555	0.230766	0.234005	0.232509	0.237143	0.244455	0.255949	0.262268	0.264614	0.256106	0.252662	0.252719	0.260293	0.268029	0.275947	0.280664	0.282813	0.280782	0.268844	0.254206	0.239312	0.227407	0.217076	0.205583	0.196607	0.190167	0.183741	0.18229	0.190857	0.198359	0.207985	0.227335	0.253004	0.282558	0.319092	0.356615	0.395019	0.408285	0.417399	0.422068	0.399807	0.373502	0.352674	0.325636
0.496857	0.436043	0.379656	0.325498	0.283571	0.249208	0.222166	0.196388	0.1799	0.170412	0.168717	0.172688	0.18802	0.188478	0.187282	0.184308	0.173745	0.162799	0.15446	0.14973	0.147687	0.15311	0.159395	0.165914	0.170915	0.175782	0.180477	0.185366	0.187391	0.183735	0.174229	0.161594	0.149661	0.144616	0.147553	0.150552	0.157074	0.170324	0.193326	0.226389	0.272413	0.312115	0.341309	0.35543	0.347405	0.333952	0.315817	0.306253	0.300828	0.306533
0.156149	0.158843	0.160186	0.159134	0.161488	0.164442	0.166231	0.171063	0.177453	0.181668	0.180844	0.175051	0.173148	0.169751	0.163563	0.163245	0.160797	0.148023	0.133857	0.11987	0.112227	0.106734	0.10299	0.105761	0.106347	0.103691	0.112075	0.122267	0.132163	0.137876	0.141746	0.138615	0.141696	0.151608	0.165504	0.182388	0.206127	0.241219	0.282578	0.376809	0.479276	0.591473	0.696257	0.790289	0.859154	0.911251	0.951664	0.961411	0.95848	0.944177
0.211167	0.209568	0.209005	0.217413	0.226231	0.235593	0.248456	0.256557	0.25986	0.25799	0.253359	0.246802	0.241322	0.242841	0.248931	0.247926	0.249145	0.249959	0.24454	0.244539	0.242855	0.232426	0.230037	0.22967	0.229985	0.243363	0.252697	0.257306	0.255782	0.252599	0.25272	0.256077	0.269257	0.278334	0.284594	0.282107	0.284489	0.291121	0.296833	0.314448	0.358719	0.416214	0.484109	0.553124	0.604927	0.642671	0.680205	0.716872	0.731254	0.733351
0.0304194	0.0344678	0.0365147	0.0354747	0.0320642	0.0279784	0.0234222	0.0236072	0.0268624	0.0354357	0.0423218	0.0479732	0.0503131	0.0527338	0.0554271	0.056989	0.058585	0.0648319	0.0678084	0.0680388	0.0716729	0.0735579	0.072251	0.0754348	0.0803381	0.0869012	0.100183	0.116393	0.124334	0.132626	0.14128	0.130794	0.122811	0.121316	0.121757	0.124074	0.13822	0.156588	0.180106	0.207844	0.237571	0.265566	0.299333	0.338719	0.39001	0.454642	0.5359	0.599831	0.646674	0.661646
0.196921	0.211511	0.223686	0.232073	0.2312	0.225905	0.213661	0.211383	0.213792	0.218801	0.218278	0.211357	0.208448	0.204896	0.2008	0.20588	0.209135	0.209206	0.21679	0.227079	0.240741	0.261076	0.284265	0.307098	0.332842	0.362059	0.377751	0.392717	0.408727	0.416382	0.422642	0.432709	0.440854	0.44808	0.474013	0.516483	0.592175	0.700671	0.811727	0.897895	0.959555	0.987114	0.951484	0.900413	0.838433	0.777587	0.717754	0.665985	0.625025	0.600143
0.164635	0.165389	0.167044	0.171471	0.174616	0.178892	0.191231	0.204522	0.21839	0.231382	0.244578	0.257987	0.269773	0.283885	0.302102	0.328926	0.356005	0.378068	0.386263	0.374924	0.338344	0.313532	0.286441	0.258921	0.241291	0.221467	0.20105	0.196036	0.191916	0.188653	0.195001	0.20018	0.20271	0.211961	0.222244	0.229243	0.235086	0.239453	0.238241	0.243644	0.258852	0.291645	0.336758	0.414172	0.483131	0.545169	0.581002	0.596977	0.578473	0.550407
0.200567	0.208759	0.216415	0.223007	0.224754	0.222207	0.216811	0.217642	0.217665	0.216805	0.220319	0.221828	0.219061	0.217328	0.214948	0.210053	0.203307	0.195982	0.191248	0.189138	0.189362	0.184836	0.180615	0.176996	0.175758	0.176939	0.182715	0.188009	0.192753	0.195886	0.198202	0.200668	0.211061	0.220316	0.228504	0.229391	0.226192	0.217641	0.219657	0.225502	0.236221	0.249484	0.260479	0.258813	0.252095	0.242496	0.232398	0.223704	0.216236	0.226466
0.350826	0.346436	0.348207	0.350244	0.32878	0.300559	0.26686	0.222122	0.178843	0.137636	0.108624	0.0826027	0.0610128	0.0477341	0.0373424	0.0272218	0.0174222	0.00814634	0.0011001	-0.00467506	-0.00954144	-0.00651579	-0.00343089	-0.000715324	0.00789326	0.0152404	0.0214638	0.0283308	0.0342756	0.0359605	0.0409081	0.0477057	0.0576724	0.0697549	0.0830604	0.0957373	0.105081	0.114843	0.126882	0.147211	0.16898	0.188696	0.216464	0.246675	0.277593	0.296528	0.308403	0.310325	0.292925	0.276027
0.216629	0.1934	0.165591	0.147748	0.140453	0.137371	0.143533	0.156829	0.158652	0.156887	0.152404	0.149419	0.150983	0.155726	0.167761	0.176932	0.18329	0.186393	0.188876	0.189887	0.188681	0.18728	0.182972	0.173849	0.164323	0.154019	0.138641	0.126815	0.117763	0.110592	0.107963	0.11187	0.12138	0.130907	0.140467	0.142125	0.1423	0.144184	0.147574	0.152632	0.167073	0.176057	0.180005	0.198631	0.216886	0.231963	0.245067	0.253174	0.24688	0.244795
0.232743	0.232865	0.232177	0.227821	0.219612	0.207428	0.194242	0.179858	0.171901	0.16674	0.161807	0.15782	0.154565	0.154592	0.153099	0.149571	0.150027	0.150011	0.147599	0.150497	0.156119	0.165945	0.182352	0.203328	0.231477	0.260796	0.291422	0.302642	0.308961	0.309745	0.296376	0.280547	0.2694	0.259332	0.251565	0.258478	0.269137	0.282869	0.291609	0.29798	0.301147	0.30232	0.299476	0.287095	0.279954	0.276208	0.279827	0.295136	0.318209	0.332066
0.30232	0.299476	0.287095	0.279954	0.276208	0.279827	0.295136	0.318209	0.332066	0.337908	0.333615	0.317552	0.297647	0.273059	0.253912	0.236757	0.220576	0.209859	0.202396	0.195791	0.193871	0.197391	0.203549	0.211778	0.223468	0.237739	0.252772	0.267934	0.273818	0.271553	0.26375	0.252512	0.236664	0.238525	0.239924	0.232572	0.231403	0.232555	0.233872	0.2578	0.295841	0.346073	0.405551	0.473739	0.59717	0.703072	0.776193	0.788528	0.761508	0.663433
0.252512	0.236664	0.238525	0.239924	0.232572	0.231403	0.232555	0.233872	0.2578	0.295841	0.346073	0.405551	0.473739	0.59717	0.703072	0.776193	0.788528	0.761508	0.663433	0.579711	0.505619	0.453874	0.416396	0.38923	0.363763	0.338108	0.312218	0.291347	0.273923	0.262514	0.258818	0.258572	0.262168	0.268398	0.276792	0.297484	0.325134	0.360643	0.410006	0.461004	0.512999	0.553036	0.58514	0.601441	0.62029	0.639868	0.654997	0.676882	0.704339	0.679567
0.0957005	0.103731	0.119269	0.136006	0.154192	0.164711	0.171205	0.17129	0.173333	0.177075	0.185245	0.189857	0.192585	0.197994	0.212207	0.234392	0.256892	0.273496	0.28162	0.271846	0.259074	0.248585	0.24602	0.247074	0.249985	0.25382	0.258384	0.265565	0.272653	0.279644	0.281575	0.276106	0.25746	0.234922	0.217338	0.202237	0.190129	0.187622	0.191844	0.205786	0.223687	0.245713	0.270463	0.29228	0.304725	0.29973	0.287076	0.263427	0.245278	0.230702
0.0561732	0.0563914	0.0742173	0.106692	0.130453	0.153046	0.174302	0.172426	0.168855	0.172102	0.160002	0.152634	0.159466	0.154014	0.14948	0.147981	0.126649	0.113582	0.107235	0.123903	0.147819	0.178567	0.204283	0.213259	0.206759	0.213687	0.241062	0.282353	0.342858	0.373271	0.385524	0.364028	0.337154	0.308139	0.281693	0.269625	0.265214	0.259389	0.256637	0.257923	0.263261	0.289984	0.319537	0.336484	0.368227	0.411291	0.437385	0.454457	0.46017	0.423112
0.177975	0.18717	0.190645	0.190919	0.188673	0.185466	0.181227	0.176978	0.175889	0.180917	0.190336	0.201687	0.215933	0.221681	0.22242	0.213997	0.199746	0.18421	0.170912	0.1605	0.151643	0.145451	0.144383	0.147192	0.155557	0.166675	0.180884	0.18932	0.198875	0.211718	0.22243	0.233008	0.245239	0.263303	0.286556	0.330299	0.368925	0.407553	0.448212	0.523058	0.609483	0.710298	0.822272	0.905999	0.937708	0.933359	0.903595	0.849941	0.779555	0.719433
0.00930375	0.00952022	0.0114662	0.0144445	0.0184014	0.0219234	0.0255417	0.0309002	0.037152	0.0436891	0.0443453	0.0450841	0.0459105	0.0423565	0.044605	0.0518871	0.0582795	0.0635345	0.0684434	0.0755484	0.081565	0.0869749	0.0975677	0.10525	0.109624	0.113939	0.116066	0.114179	0.113225	0.11145	0.106203	0.0984394	0.0893555	0.079341	0.0705847	0.0628184	0.0567368	0.0500722	0.0425114	0.0402116	0.0406375	0.0454647	0.0662498	0.0901351	0.109905	0.12407	0.123321	0.114754	0.10376	0.099814
Time relative to onset of a reversal (s)
-20	-19.5	-19	-18.5	-18	-17.5	-17	-16.5	-16	-15.5	-15	-14.5	-14	-13.5	-13	-12.5	-12	-11.5	-11	-10.5	-10	-9.5	-9	-8.5	-8	-7.5	-7	-6.5	-6	-5.5	-5	-4.5	-4	-3.5	-3	-2.5	-2	-1.5	-1	-0.5	0	0.5	1	1.5	2	2.5	3	3.5	4	4.5
Calcium activity in AIY (dR/R0)
0.373161	0.382347	0.394615	0.417419	0.442003	0.467446	0.479252	0.471388	0.445098	0.419811	0.394515	0.374801	0.368314	0.371102	0.379176	0.394976	0.401909	0.405627	0.405251	0.388199	0.370002	0.352883	0.34087	0.329175	0.317733	0.324086	0.318062	0.301392	0.290327	0.283924	0.282768	0.297884	0.310112	0.319869	0.3187	0.309499	0.299012	0.298496	0.298287	0.298953	0.312006	0.32712	0.343772	0.365123	0.384635	0.402029	0.409963	0.423224	0.436672	0.439199
0.331509	0.299961	0.278495	0.263672	0.260879	0.258725	0.257128	0.253907	0.248756	0.240984	0.233104	0.223335	0.209232	0.201161	0.194624	0.185686	0.183293	0.184396	0.179872	0.180118	0.185723	0.186036	0.18552	0.18442	0.183316	0.18353	0.187955	0.196725	0.206999	0.208685	0.212391	0.218051	0.224021	0.234143	0.250739	0.269949	0.285273	0.288487	0.292007	0.294065	0.287178	0.28245	0.278925	0.264874	0.256679	0.25521	0.266394	0.280045	0.296247	0.305542
0.108979	0.118131	0.126832	0.132227	0.139088	0.146634	0.15144	0.161961	0.177488	0.201394	0.226242	0.252038	0.273871	0.291519	0.292106	0.288642	0.280811	0.263984	0.246708	0.22993	0.225115	0.224981	0.230332	0.238653	0.245618	0.246998	0.254183	0.263581	0.27453	0.285855	0.297543	0.298393	0.297618	0.295229	0.290025	0.28168	0.26924	0.261688	0.250879	0.234909	0.226512	0.217555	0.203956	0.189076	0.173473	0.156672	0.145475	0.138397	0.139333	0.136487
0.286915	0.29203	0.285744	0.275986	0.262557	0.244842	0.226695	0.217331	0.204398	0.189305	0.189109	0.192561	0.200304	0.215987	0.235904	0.262535	0.283133	0.299116	0.30391	0.300386	0.291871	0.281932	0.271115	0.259635	0.246463	0.238694	0.237683	0.239609	0.244775	0.256218	0.268934	0.280482	0.285353	0.291548	0.297339	0.288833	0.284991	0.285462	0.275467	0.264078	0.253698	0.249607	0.250017	0.260487	0.281972	0.309077	0.329862	0.346774	0.358149	0.354575
0.428269	0.420128	0.409701	0.398779	0.387847	0.378504	0.370309	0.360794	0.352913	0.348189	0.340322	0.332401	0.32698	0.315719	0.30103	0.285415	0.272136	0.258815	0.245161	0.239521	0.235747	0.231857	0.231984	0.234192	0.237077	0.239547	0.241648	0.244157	0.246457	0.246891	0.247101	0.247129	0.239893	0.232046	0.223477	0.222517	0.223531	0.226494	0.233646	0.239854	0.23768	0.244636	0.259317	0.278172	0.302329	0.332829	0.354891	0.368856	0.367049	0.353366
0.384605	0.397869	0.400277	0.39725	0.387638	0.365388	0.343423	0.325342	0.311977	0.302222	0.304767	0.323294	0.353179	0.379461	0.404868	0.429189	0.424191	0.408456	0.383551	0.363472	0.346499	0.336296	0.328735	0.323323	0.309918	0.294857	0.278873	0.278771	0.288147	0.321335	0.358849	0.400876	0.41374	0.415142	0.400996	0.384046	0.365826	0.346246	0.329557	0.314708	0.319289	0.332418	0.357735	0.382163	0.403872	0.398661	0.3886	0.374105	0.361387	0.354993
0.215639	0.209885	0.210859	0.218219	0.234142	0.258933	0.277961	0.293118	0.305221	0.304941	0.296701	0.280966	0.269663	0.266727	0.278414	0.30628	0.350115	0.398457	0.449569	0.486652	0.514333	0.531607	0.543289	0.553126	0.562195	0.573757	0.585395	0.597122	0.615433	0.639077	0.67006	0.720705	0.75059	0.763027	0.748708	0.722457	0.683043	0.647195	0.610402	0.56732	0.530923	0.496362	0.466688	0.450785	0.433437	0.424633	0.426108	0.44179	0.457962	0.471776
0.29228	0.304725	0.29973	0.287076	0.263427	0.245278	0.230702	0.22336	0.22041	0.220402	0.224697	0.229341	0.234348	0.236052	0.235972	0.233192	0.231038	0.228904	0.226246	0.231876	0.242037	0.254254	0.26971	0.288129	0.321597	0.349848	0.368865	0.388376	0.408068	0.445368	0.501094	0.594068	0.698607	0.797652	0.860722	0.88313	0.868915	0.841044	0.795309	0.75344	0.731516	0.687628	0.637572	0.583762	0.526664	0.468727	0.425347	0.396763	0.382283	0.386104
0.21555	0.229307	0.242114	0.250566	0.255697	0.257113	0.257476	0.256621	0.252952	0.246743	0.23604	0.223228	0.212277	0.21165	0.216137	0.223555	0.230766	0.234005	0.232509	0.237143	0.244455	0.255949	0.262268	0.264614	0.256106	0.252662	0.252719	0.260293	0.268029	0.275947	0.280664	0.282813	0.280782	0.268844	0.254206	0.239312	0.227407	0.217076	0.205583	0.196607	0.190167	0.183741	0.18229	0.190857	0.198359	0.207985	0.227335	0.253004	0.282558	0.319092
0.905999	0.937708	0.933359	0.903595	0.849941	0.779555	0.719433	0.66372	0.59816	0.548965	0.496857	0.436043	0.379656	0.325498	0.283571	0.249208	0.222166	0.196388	0.1799	0.170412	0.168717	0.172688	0.18802	0.188478	0.187282	0.184308	0.173745	0.162799	0.15446	0.14973	0.147687	0.15311	0.159395	0.165914	0.170915	0.175782	0.180477	0.185366	0.187391	0.183735	0.174229	0.161594	0.149661	0.144616	0.147553	0.150552	0.157074	0.170324	0.193326	0.226389
0.129306	0.118138	0.116812	0.117545	0.129429	0.141643	0.154127	0.166862	0.177353	0.1846	0.189655	0.192138	0.189621	0.186259	0.181919	0.173398	0.163805	0.153482	0.150108	0.148717	0.149872	0.152967	0.156149	0.158843	0.160186	0.159134	0.161488	0.164442	0.166231	0.171063	0.177453	0.181668	0.180844	0.175051	0.173148	0.169751	0.163563	0.163245	0.160797	0.148023	0.133857	0.11987	0.112227	0.106734	0.10299	0.105761	0.106347	0.103691	0.112075	0.122267
0.148741	0.14727	0.147323	0.153302	0.157145	0.159224	0.161932	0.162272	0.161204	0.157613	0.150716	0.145505	0.146911	0.146845	0.145768	0.143354	0.142245	0.143404	0.146823	0.155958	0.162863	0.161222	0.158707	0.155959	0.154832	0.159075	0.166166	0.172524	0.168692	0.167159	0.168116	0.176102	0.188254	0.201917	0.210684	0.211167	0.209568	0.209005	0.217413	0.226231	0.235593	0.248456	0.256557	0.25986	0.25799	0.253359	0.246802	0.241322	0.242841	0.248931
0.369533	0.374062	0.374657	0.368792	0.359858	0.344694	0.3334	0.324982	0.32705	0.315349	0.288147	0.243547	0.195494	0.143861	0.106386	0.0768371	0.0612007	0.046254	0.0322688	0.0230244	0.0175896	0.0152202	0.0168974	0.0198488	0.0234168	0.0248869	0.0247827	0.0205794	0.0187904	0.0192892	0.0190422	0.0201202	0.0232812	0.0219318	0.0192706	0.0158137	0.0149033	0.015571	0.0190292	0.0240841	0.0304194	0.0344678	0.0365147	0.0354747	0.0320642	0.0279784	0.0234222	0.0236072	0.0268624	0.0354357
0.107685	0.108818	0.114511	0.120593	0.126844	0.134059	0.14071	0.142003	0.143434	0.144974	0.147302	0.15012	0.153501	0.156725	0.159538	0.159526	0.162542	0.168017	0.164421	0.162261	0.163465	0.162769	0.162754	0.166234	0.164918	0.160975	0.153922	0.148421	0.14415	0.14621	0.151629	0.161106	0.172912	0.182699	0.187451	0.191611	0.194892	0.195217	0.195387	0.195403	0.195904	0.196921	0.211511	0.223686	0.232073	0.2312	0.225905	0.213661	0.211383	0.213792
0.263579	0.277898	0.303194	0.326709	0.348822	0.371614	0.384897	0.37542	0.353648	0.322983	0.269341	0.226642	0.192661	0.167581	0.147491	0.133238	0.120382	0.113021	0.109596	0.105551	0.101789	0.101072	0.100528	0.100238	0.100208	0.0997781	0.0982518	0.0941136	0.089809	0.0917939	0.0949988	0.0990158	0.0997869	0.10053	0.101242	0.106659	0.115598	0.130045	0.14303	0.154536	0.155696	0.159004	0.164635	0.165389	0.167044	0.171471	0.174616	0.178892	0.191231	0.204522
0.348118	0.340423	0.333017	0.32541	0.315246	0.30256	0.287667	0.276608	0.268003	0.264123	0.26348	0.265671	0.259352	0.251811	0.242857	0.234139	0.225917	0.218783	0.21064	0.201621	0.19152	0.183022	0.184893	0.195535	0.200445	0.205559	0.211084	0.212414	0.219124	0.233598	0.235601	0.229818	0.21647	0.190005	0.172989	0.157691	0.1447	0.149034	0.15437	0.162658	0.17695	0.18947	0.200567	0.208759	0.216415	0.223007	0.224754	0.222207	0.216811	0.217642
0.27548	0.26387	0.251144	0.239187	0.228329	0.223947	0.219319	0.211213	0.213003	0.218069	0.219013	0.22658	0.238226	0.240566	0.247778	0.260227	0.266586	0.271974	0.276369	0.275797	0.272696	0.26571	0.258363	0.251716	0.253112	0.253513	0.253086	0.251225	0.244756	0.231367	0.2217	0.218074	0.227911	0.247033	0.271286	0.303385	0.317082	0.316993	0.310376	0.299273	0.282937	0.280384	0.280033	0.281177	0.278729	0.275632	0.273788	0.278798	0.287821	0.311397
0.523326	0.544861	0.565447	0.581574	0.596091	0.610142	0.622857	0.63563	0.649333	0.6605	0.663099	0.651623	0.645223	0.641246	0.638775	0.644531	0.649637	0.644717	0.634996	0.621725	0.59908	0.579985	0.558363	0.521603	0.499252	0.478463	0.46005	0.459305	0.462198	0.461302	0.451447	0.436556	0.420097	0.407066	0.395941	0.385685	0.356636	0.324063	0.289901	0.256374	0.229738	0.210451	0.202516	0.201846	0.209593	0.215861	0.218037	0.213823	0.204091	0.196613
NaN	NaN	NaN	NaN	NaN	NaN	NaN	NaN	NaN	NaN	NaN	NaN	NaN	NaN	NaN	NaN	NaN	NaN	0.253439	0.256455	0.269705	0.287073	0.30337	0.308671	0.30597	0.288415	0.27453	0.264624	0.255057	0.246749	0.24356	0.238119	0.231675	0.230177	0.229469	0.22952	0.238483	0.249334	0.262395	0.271741	0.278583	0.279566	0.277711	0.274338	0.270083	0.274041	0.283876	0.288343	0.29888	0.316312
0.279566	0.277711	0.274338	0.270083	0.274041	0.283876	0.288343	0.29888	0.316312	0.312306	0.308314	0.309274	0.301737	0.2924	0.287627	0.277095	0.263984	0.255265	0.247983	0.241947	0.241814	0.240072	0.234118	0.232743	0.232865	0.232177	0.227821	0.219612	0.207428	0.194242	0.179858	0.171901	0.16674	0.161807	0.15782	0.154565	0.154592	0.153099	0.149571	0.150027	0.150011	0.147599	0.150497	0.156119	0.165945	0.182352	0.203328	0.231477	0.260796	0.291422
0.171901	0.16674	0.161807	0.15782	0.154565	0.154592	0.153099	0.149571	0.150027	0.150011	0.147599	0.150497	0.156119	0.165945	0.182352	0.203328	0.231477	0.260796	0.291422	0.302642	0.308961	0.309745	0.296376	0.280547	0.2694	0.259332	0.251565	0.258478	0.269137	0.282869	0.291609	0.29798	0.301147	0.30232	0.299476	0.287095	0.279954	0.276208	0.279827	0.295136	0.318209	0.332066	0.337908	0.333615	0.317552	0.297647	0.273059	0.253912	0.236757	0.220576
0.468222	0.460428	0.450338	0.437958	0.438315	0.430564	0.409809	0.400083	0.389396	0.370699	0.35666	0.341885	0.305747	0.280429	0.263573	0.264935	0.274839	0.295342	0.316578	0.336508	0.353614	0.36998	0.387895	0.41249	0.434699	0.453477	0.452516	0.43313	0.398016	0.35002	0.302812	0.25702	0.218584	0.184677	0.159434	0.136538	0.116204	0.104453	0.093526	0.0829798	0.0795155	0.0767455	0.071147	0.0685142	0.0671916	0.0656652	0.0640019	0.0621881	0.0626253	0.0624059
0.3594	0.356818	0.354899	0.353388	0.346738	0.353081	0.377633	0.399843	0.422242	0.447614	0.448612	0.439357	0.432407	0.426133	0.420375	0.40834	0.396896	0.385857	0.365292	0.34994	0.339075	0.321192	0.303448	0.286305	0.270697	0.25527	0.241133	0.233475	0.222087	0.207866	0.18615	0.167649	0.152692	0.124887	0.0958086	0.0667403	0.0340918	0.0145015	0.00746224	0.00231539	-0.00181904	-0.00429082	-0.0198727	-0.0325052	-0.038894	-0.0416546	-0.03813	-0.0192423	-0.00573864	0.00558719
0.413829	0.40829	0.399249	0.390764	0.394916	0.401154	0.40909	0.413194	0.413423	0.40837	0.403909	0.40255	0.409082	0.40832	0.402899	0.38794	0.369419	0.348562	0.343591	0.330239	0.306401	0.272852	0.231979	0.178354	0.145447	0.121204	0.105585	0.0993769	0.0972121	0.0851391	0.0733315	0.0617632	0.0435999	0.0282794	0.0178252	0.0116697	0.00768403	0.00736769	0.0069122	0.00654723	0.00702122	0.00731415	0.00746121	0.00988703	0.0114596	0.0119367	0.0133005	0.0140957	0.0133747	0.015591
0.350387	0.324299	0.30668	0.299473	0.285939	0.269114	0.251332	0.226004	0.197036	0.175246	0.160417	0.150295	0.150438	0.145424	0.137195	0.135321	0.133899	0.133054	0.137942	0.142199	0.143383	0.142172	0.139636	0.134712	0.130786	0.126849	0.120038	0.114645	0.110079	0.10695	0.111343	0.119631	0.120874	0.126039	0.135013	0.136472	0.141943	0.152712	0.155362	0.152364	0.139846	0.117461	0.0898527	0.0578366	0.0440818	0.0313671	0.0196644	0.0127953	0.00749873	0.00465455
[truncated: 131 more columns]

## Sheet: Fig 4-AVB abl
Time relative to onset of a forward run (s)
-20	-19.5	-19	-18.5	-18	-17.5	-17	-16.5	-16	-15.5	-15	-14.5	-14	-13.5	-13	-12.5	-12	-11.5	-11	-10.5	-10	-9.5	-9	-8.5	-8	-7.5	-7	-6.5	-6	-5.5	-5	-4.5	-4	-3.5	-3	-2.5	-2	-1.5	-1	-0.5	0	0.5	1	1.5	2	2.5	3	3.5	4	4.5
Calcium activity in AIY (dR/R0)
0.170273	0.181267	0.187691	0.193297	0.198617	0.205377	0.215341	0.227626	0.241847	0.251663	0.260211	0.265359	0.267628	0.261965	0.255539	0.248349	0.242373	0.236851	0.236321	0.235704	0.233637	0.228358	0.217409	0.206772	0.196344	0.184255	0.171833	0.165143	0.158636	0.151993	0.146878	0.143941	0.143118	0.143466	0.147471	0.151693	0.154404	0.156972	0.159143	0.170288	0.189719	0.299338	0.437258	0.566482	0.686151	0.781301	0.810232	0.778138	0.74413	0.709626
0.0311915	0.0377159	0.0474867	0.0554756	0.0603246	0.0607007	0.0544397	0.0471357	0.0399336	0.034297	0.0303108	0.0333952	0.0369155	0.0370987	0.0327012	0.0251852	0.0120929	0.000746534	-0.00864196	-0.00386372	0.00430248	0.0162098	0.0312984	0.0423405	0.0431395	0.0452782	0.0470707	0.0466315	0.0480253	0.0506687	0.0482235	0.0457604	0.0449752	0.0422366	0.0404307	0.0439006	0.0550783	0.0706738	0.0928719	0.108997	0.120055	0.104631	0.0861911	0.0629712	0.0466188	0.034623	0.0294072	0.0271007	0.025319	0.0222509
0.222242	0.19055	0.159214	0.132755	0.111771	0.0952229	0.0904748	0.0913504	0.0964632	0.105878	0.110781	0.11101	0.100385	0.0888428	0.0767259	0.0716488	0.0696621	0.070913	0.0696314	0.0672847	0.0671265	0.0686436	0.0715482	0.0851086	0.0983806	0.111355	0.118271	0.119041	0.110458	0.0941291	0.0780032	0.0661047	0.0607024	0.0557596	0.0446393	0.0384596	0.0343397	0.0280214	0.0318993	0.0427957	0.0543575	0.068906	0.0862898	0.102564	0.117889	0.132017	0.140549	0.149715	0.161268	0.172915
0.0687049	0.0659209	0.0632916	0.0609663	0.0608341	0.0627523	0.0602744	0.056619	0.0550974	0.054157	0.0546006	0.0561189	0.0584901	0.0596872	0.0599652	0.0523657	0.0457488	0.0410596	0.036281	0.0314516	0.0285924	0.0261441	0.0233411	0.0227074	0.0259607	0.0307633	0.036377	0.0377097	0.0375795	0.03245	0.027777	0.0236931	0.0226078	0.0228224	0.0255853	0.0274835	0.0258911	0.0238512	0.0213121	0.0175941	0.0134484	0.0167381	0.0328433	0.0871745	0.215695	0.414364	0.601807	0.783578	0.897711	0.971
0.105436	0.0954362	0.0934644	0.0972347	0.141168	0.196797	0.267833	0.334777	0.41553	0.538245	0.642036	0.724483	0.756648	0.756158	0.692892	0.610899	0.53907	0.494544	0.453352	0.413866	0.373709	0.333582	0.29467	0.257263	0.223026	0.192528	0.165327	0.144244	0.124658	0.110315	0.0976809	0.0883502	0.0794602	0.0709137	0.0725106	0.0764192	0.0745477	0.0777146	0.0925631	0.0985293	0.10377	0.128684	0.162278	0.209872	0.258488	0.302682	0.325111	0.317033	0.290418	0.252237
0.401123	0.385258	0.36958	0.353965	0.339662	0.324676	0.307042	0.290142	0.274158	0.259907	0.247311	0.238636	0.230502	0.223115	0.215552	0.207902	0.20354	0.200047	0.199519	0.199225	0.199298	0.1979	0.195149	0.192644	0.190208	0.189977	0.190215	0.191932	0.193986	0.196712	0.200537	0.205562	0.209328	0.212574	0.219792	0.247347	0.362239	0.488251	0.629935	0.767309	0.902334	0.926954	0.930776	0.898683	0.86148	0.815524	0.770977	0.727326	0.682162	0.636971
0.0369515	0.0359481	0.0372315	0.0384849	0.0401702	0.0421937	0.0448527	0.0461103	0.0457477	0.0472128	0.0471433	0.0443685	0.0407127	0.036656	0.0320532	0.0328253	0.0348808	0.0355974	0.0334953	0.0291875	0.0195106	0.013501	0.0102604	0.00969459	0.010745	0.0134401	0.0149065	0.0159826	0.0162517	0.0168743	0.019358	0.0205657	0.0211073	0.024692	0.0306024	0.038844	0.047228	0.0589775	0.0785682	0.0897776	0.0983955	0.108979	0.109715	0.103686	0.103509	0.100715	0.0941918	0.0875774	0.0805834	0.0727014
0.120539	0.132011	0.12884	0.13325	0.1453	0.163091	0.177482	0.186349	0.176902	0.159308	0.135131	0.118295	0.106916	0.107816	0.113701	0.127463	0.147807	0.167842	0.179762	0.185659	0.186135	0.161268	0.138956	0.121019	0.120668	0.132153	0.162517	0.195747	0.22883	0.258357	0.278355	0.295602	0.322575	0.349955	0.377691	0.414447	0.447243	0.473131	0.556776	0.653048	0.750264	0.846169	0.918626	0.90134	0.843224	0.764858	0.689296	0.631974	0.587591	0.583003
0.0937824	0.0896818	0.0824572	0.0728253	0.0609154	0.052341	0.0469398	0.0389574	0.0369274	0.0362671	0.0328636	0.0348364	0.0371335	0.0388252	0.037361	0.034617	0.0299705	0.0214933	0.0142756	0.0101213	0.0197362	0.0316317	0.0496871	0.0635119	0.0753012	0.0676417	0.0554454	0.0335101	0.0195177	0.0146544	0.0186501	0.029486	0.0397679	0.0501988	0.0634729	0.0755502	0.0866496	0.0901493	0.0855623	0.075851	0.0641426	0.0572652	0.0533518	0.0516779	0.0515653	0.0515493	0.0502832	0.0466385	0.0432733	0.0435971
0.314708	0.333533	0.351152	0.348938	0.335601	0.314681	0.283062	0.242976	0.206046	0.168616	0.130106	0.105826	0.0865652	0.0732065	0.077583	0.090942	0.113903	0.149426	0.190588	0.229806	0.250781	0.25853	0.250688	0.238935	0.223535	0.213065	0.204928	0.199652	0.18577	0.168854	0.149565	0.133996	0.121278	0.123404	0.137449	0.162538	0.188526	0.210913	0.228266	0.242499	0.246723	0.230478	0.207503	0.178509	0.136432	0.103115	0.0764813	0.0728422	0.0807449	0.103385
0.393821	0.37948	0.342959	0.297201	0.279322	0.261012	0.242037	0.226899	0.211107	0.193954	0.179731	0.166909	0.156613	0.152453	0.149236	0.142477	0.135315	0.127076	0.112423	0.0933057	0.0717466	0.0526832	0.0340877	0.0174174	0.0251802	0.0279254	0.0261126	0.0293127	0.0279964	0.0193371	0.0250058	0.0370482	0.0606133	0.0926684	0.128861	0.169599	0.209411	0.242917	0.265457	0.371756	0.503535	0.642788	0.785341	0.911123	0.943337	0.920043	0.859896	0.771397	0.678808	0.584822
0.0346739	0.0335512	0.033153	0.0321219	0.0307082	0.0293794	0.0281191	0.0271914	0.0255278	0.022719	0.0187276	0.0140882	0.00935623	0.00507119	0.00274348	0.000825616	-0.000339753	-0.00088883	-0.00106687	-0.000992044	-0.000994599	-0.00156514	-0.00228889	-0.00313075	-0.00420058	-0.00454351	-0.00443023	-0.00409689	-0.00336758	-0.00177611	0.000544917	0.00343998	0.00429293	0.00512105	0.00592006	0.0154393	0.0289501	0.0327331	0.0342421	0.0349256	0.0315085	0.0191991	0.0142376	0.0149423	0.0161617	0.0175404	0.0192974	0.0215738	0.0251012	0.029564
0.281572	0.317032	0.342162	0.364693	0.369259	0.369063	0.352053	0.323652	0.278036	0.238514	0.202751	0.176987	0.15324	0.135181	0.118752	0.106524	0.0973325	0.0909484	0.0856189	0.0808871	0.0737594	0.0668233	0.0609282	0.0567261	0.0543611	0.0495652	0.0438186	0.0409487	0.0372671	0.0290139	0.0232422	0.0192971	0.0158458	0.012608	0.0280013	0.0483853	0.0933657	0.149609	0.214719	0.247257	0.279528	0.316208	0.355035	0.394699	0.464475	0.543849	0.614669	0.675654	0.705318	0.718251
0.0504878	0.0326759	0.0155287	0.00536569	-0.00272167	-0.000709088	0.00286188	0.0112722	0.0191725	0.0261333	0.03276	0.0391362	0.0443476	0.0496295	0.0650991	0.0774973	0.084241	0.0881515	0.0899348	0.0862844	0.0801931	0.0683662	0.0566025	0.0482903	0.0407583	0.0345504	0.0394366	0.0520133	0.0742435	0.100373	0.114319	0.125038	0.122723	0.114708	0.0971061	0.0852809	0.077107	0.0662633	0.0543357	0.0470037	0.0401818	0.0348967	0.0347507	0.0403626	0.0451116	0.0495105	0.065255	0.0846263	0.120592	0.159205
0.0658764	0.0624049	0.057537	0.0559824	0.055103	0.0547914	0.0555924	0.0587443	0.0616194	0.0642654	0.073559	0.0847342	0.102909	0.120477	0.134759	0.144963	0.148557	0.146395	0.14078	0.135543	0.13019	0.123275	0.116527	0.1101	0.104221	0.0987898	0.0938606	0.0890887	0.0853366	0.0815397	0.0776128	0.0751442	0.0741993	0.0686393	0.0614188	0.0561081	0.0510556	0.0449821	0.0395507	0.0426235	0.0523132	0.107901	0.198815	0.391966	0.578034	0.756699	0.878751	0.978348	0.941233	0.898505
0.340133	0.286741	0.236454	0.193219	0.164641	0.1525	0.14571	0.149383	0.154153	0.160053	0.151739	0.145006	0.141587	0.139152	0.137023	0.135444	0.129816	0.120655	0.100773	0.0874324	0.0789756	0.0712433	0.0646952	0.0593794	0.053113	0.0475025	0.0439569	0.0452064	0.0473209	0.0453212	0.0414989	0.0365792	0.030524	0.028478	0.0300944	0.0349898	0.0400655	0.0444995	0.0472641	0.04737	0.0408516	0.0377478	0.036461	0.0414368	0.0547593	0.0733751	0.0736832	0.0770271	0.0835868	0.0841117
0.034669	0.0347802	0.0366545	0.0395661	0.0404229	0.0412802	0.0437446	0.0456664	0.0470499	0.044516	0.041124	0.0382576	0.0353042	0.0321326	0.0308187	0.03125	0.034555	0.0368023	0.0369872	0.0380792	0.0401657	0.0402984	0.0396056	0.0383578	0.0372753	0.0402895	0.0410237	0.0400095	0.0396239	0.0392942	0.0369006	0.0352989	0.0355555	0.0354642	0.0350609	0.0321572	0.0284414	0.0272263	0.025973	0.0244534	0.0280142	0.0405368	0.0498494	0.0570416	0.0662456	0.0741322	0.0701498	0.0671454	0.0658764	0.0624049
0.193024	0.136657	0.0874708	0.0493227	0.0257641	0.0139118	0.0139713	0.0242056	0.045498	0.0744083	0.0972087	0.10979	0.114625	0.114107	0.102996	0.0983411	0.0978561	0.103284	0.104702	0.103004	0.0978117	0.0926501	0.0875174	0.0823711	0.0775187	0.0704919	0.0539142	0.0437609	0.0387833	0.0423581	0.0416848	0.0391965	0.0348541	0.0302553	0.0294006	0.0500034	0.0885889	0.139739	0.212717	0.312638	0.440291	0.547381	0.64633	0.728068	0.741708	0.723198	0.663857	0.591053	0.512154	0.443578
0.0769759	0.0902236	0.109595	0.150147	0.188656	0.219127	0.24489	0.259889	0.253104	0.226626	0.201452	0.176729	0.138239	0.102245	0.0829771	0.0669824	0.0562507	0.048502	0.0447957	0.0406975	0.0362708	0.0349264	0.0345335	0.0353268	0.0364944	0.0392057	0.04206	0.0451871	0.0462517	0.045728	0.0408671	0.0348547	0.0251179	0.0178689	0.0182736	0.0209248	0.0271757	0.0358592	0.0469434	0.056247	0.0648734	0.0886583	0.113247	0.135382	0.155789	0.171843	0.177527	0.173	0.195506	0.227316
0.0443867	0.0542167	0.0693607	0.0806938	0.0864599	0.0914856	0.0971832	0.103065	0.1054	0.106275	0.10585	0.104226	0.105651	0.113675	0.117182	0.120908	0.128953	0.134796	0.142916	0.1668	0.184014	0.195602	0.187783	0.160863	0.115842	0.080844	0.0716945	0.075441	0.0893862	0.107662	0.120749	0.130704	0.135366	0.132961	0.127901	0.121803	0.113225	0.103844	0.0973953	0.0906684	0.0836263	0.0821013	0.0806106	0.0785095	0.0811293	0.0856945	0.0912458	0.108078	0.124299	0.139605
0.286681	0.262849	0.240156	0.225097	0.215439	0.20991	0.204399	0.19839	0.174245	0.147975	0.124288	0.102781	0.0845434	0.0750498	0.0692178	0.0656186	0.0651085	0.0703648	0.0793702	0.0885359	0.101013	0.11861	0.14558	0.171593	0.191893	0.20799	0.221679	0.231516	0.243537	0.256437	0.267057	0.27289	0.274812	0.275653	0.271813	0.262283	0.280304	0.310546	0.358363	0.442358	0.527246	0.586686	0.63086	0.661187	0.646971	0.632827	0.618756	0.591698	0.567801	0.54984
0.519319	0.612398	0.707146	0.798939	0.882748	0.945937	0.976176	0.990918	0.930253	0.847709	0.737582	0.63514	0.537766	0.455837	0.378468	0.306631	0.254835	0.205317	0.158812	0.137255	0.121286	0.112077	0.10378	0.0969042	0.0821017	0.0626284	0.0467144	0.0329113	0.0225272	0.0148479	0.00841249	0.00411761	0.00265239	0.00808694	0.0232749	0.0471145	0.0658701	0.0823671	0.0914328	0.0908729	0.0818007	0.0749677	0.0688706	0.063661	0.0574811	0.0486847	0.0445088	0.0435628	0.0452042	0.052495
0.047532	0.0469044	0.0469491	0.0475692	0.0484133	0.0495739	0.0509385	0.0531675	0.0541487	0.0545921	0.0567409	0.059184	0.0604083	0.0606863	0.0586787	0.0558371	0.0522635	0.0481694	0.0452273	0.0446363	0.045626	0.0470227	0.0467522	0.0461629	0.0452522	0.043191	0.0415148	0.0407259	0.0412255	0.0434598	0.0430898	0.0418798	0.0433332	0.0439313	0.0431702	0.0440054	0.0457573	0.0462744	0.0465972	0.0499533	0.0536051	0.0622672	0.0693277	0.0696654	0.0682855	0.0633577	0.0574755	0.0506206	0.0479386	0.0477242
0.0506096	0.0533015	0.0557995	0.0572958	0.0575733	0.0562179	0.0535709	0.0503154	0.04621	0.0428383	0.0444898	0.0451676	0.0441702	0.0454027	0.0480323	0.0440986	0.039238	0.0375789	0.0354207	0.0321493	0.0321333	0.0347917	0.0349359	0.0344468	0.0351357	0.0364823	0.0394642	0.0427638	0.0463649	0.0503496	0.0537833	0.0541367	0.0549571	0.0560375	0.0542075	0.0515628	0.0478495	0.0432091	0.0389992	0.0404533	0.0409096	0.0393235	0.0448616	0.0561259	0.0620017	0.0666259	0.0719776	0.0753207	0.0671371	0.059492
NaN	0.550543	0.682212	0.778602	0.772671	0.73403	0.66055	0.576563	0.501077	0.44716	0.402072	0.363289	0.337225	0.323623	0.317411	0.315245	0.305766	0.290723	0.282869	0.282658	0.290629	0.306958	0.33022	0.362972	0.389508	0.411019	0.424084	0.418038	0.401281	0.367815	0.328346	0.287456	0.254888	0.227265	0.20347	0.185474	0.16255	0.134664	0.147736	0.171776	0.208588	0.24047	0.266653	0.28211	0.29727	0.315589	0.344153	0.359319	0.365944	0.35543
0.171776	0.208588	0.24047	0.266653	0.28211	0.29727	0.315589	0.344153	0.359319	0.365944	0.35543	0.345837	0.336857	0.326494	0.316505	0.30771	0.282628	0.249861	0.209212	0.170679	0.134671	0.109201	0.0933136	0.0846298	0.0878503	0.0955489	0.108091	0.114403	0.115914	0.11083	0.0962199	0.0822362	0.0739281	0.0700073	0.0695872	0.0770663	0.0829357	0.0888963	0.101591	0.182538	0.31536	0.508334	0.686271	0.849195	0.861461	0.834141	0.760788	0.796788	0.850578	0.909779
0.0451116	0.0495105	0.065255	0.0846263	0.120592	0.159205	0.205694	0.248034	0.286087	0.299223	0.296603	0.280946	0.259287	0.230199	0.20658	0.187762	0.167472	0.146719	0.125698	0.104519	0.0830258	0.0655109	0.0512276	0.0444441	0.0398744	0.0386198	0.037443	0.0366614	0.0362597	0.0366218	0.0397291	0.046468	0.0710769	0.0980989	0.127815	0.160623	0.195555	0.207404	0.214433	0.21835	0.227004	0.248317	0.298213	0.358668	0.410148	0.453801	0.480183	0.49189	0.490715	0.486026
0.648603	0.627034	0.576129	0.517188	0.456645	0.408811	0.366594	0.327223	0.301318	0.282896	0.262696	0.248132	0.240826	0.216535	0.191507	0.168636	0.152991	0.148329	0.170777	0.210137	0.255928	0.300656	0.329977	0.344916	0.343503	0.332882	0.30992	0.305081	0.307026	0.318154	0.340223	0.369705	0.413119	0.455337	0.497138	0.545204	0.593913	0.64322	0.71146	0.776213	0.83595	0.86844	0.882778	0.868225	0.833913	0.793372	0.744423	0.692823	0.640322	0.60007
0.0705279	0.0572189	0.0493957	0.041724	0.0341094	0.0332727	0.0313685	0.0244652	0.0197942	0.0181309	0.0145644	0.00986139	0.0149725	0.0234549	0.0340697	0.0447724	0.0555837	0.062978	0.0628375	0.060517	0.0562578	0.0515818	0.0467635	0.0462633	0.0465574	0.0481945	0.0507098	0.0551713	0.0638522	0.0767015	0.0917849	0.107719	0.13322	0.15687	0.169196	0.176143	0.17488	0.163115	0.145065	0.129968	0.116727	0.12844	0.149465	0.232552	0.317466	0.405475	0.497796	0.594576	0.65463	0.70121
0.154741	0.16648	0.158118	0.141814	0.115907	0.0941734	0.0791826	0.085357	0.102766	0.129777	0.141797	0.1479	0.145856	0.137861	0.121153	0.0971317	0.0713146	0.0419574	0.00739959	0.0063841	0.016276	0.0376761	0.0673635	0.0996332	0.132596	0.178789	0.231852	0.309321	0.377917	0.439521	0.486444	0.520986	0.531317	0.5074	0.46921	0.381554	0.319516	0.277972	0.281851	0.293415	0.312094	0.320901	0.327147	0.3304	0.36276	0.406093	0.463129	0.480656	0.475038	0.432234
0.0365152	0.0345477	0.0339705	0.0334269	0.0325557	0.0320149	0.0320424	0.0330736	0.0333185	0.0333085	0.0321005	0.031348	0.0317172	0.0327616	0.0341902	0.0351456	0.035585	0.0347922	0.0325871	0.0300675	0.0278366	0.0267786	0.0287217	0.0318421	0.0360431	0.0416118	0.0476082	0.0493317	0.0508426	0.0516009	0.0515665	0.0492453	0.0467681	0.0441473	0.0414544	0.0388872	0.0398383	0.0404209	0.0401479	0.0415621	0.0442924	0.0462185	0.0478825	0.0600607	0.0702747	0.0754675	0.0799349	0.0837845	0.0772915	0.0687049
0.302867	0.45645	0.611147	0.722772	0.796263	0.783036	0.73438	0.637982	0.532614	0.422316	0.334444	0.25322	0.212016	0.172342	0.138575	0.111103	0.0921351	0.0732997	0.0545311	0.0490441	0.0452839	0.0424154	0.040115	0.0397809	0.038465	0.0360226	0.0366326	0.0386425	0.0379353	0.037077	0.0415316	0.04449	0.0428479	0.0401412	0.0361091	0.0452125	0.0609059	0.0839021	0.107854	0.166736	0.228556	0.292767	0.359313	0.436149	0.506986	0.569026	0.616538	0.655337	0.649748	0.633417
0.0891375	0.112233	0.132369	0.166823	0.217926	0.25974	0.301337	0.344083	0.343383	0.333616	0.31789	0.288451	0.243159	0.199093	0.155831	0.112141	0.0813537	0.0643452	0.0493227	0.0357319	0.0288534	0.022658	0.0174702	0.0146028	0.0130206	0.00898584	0.00587907	0.00859138	0.0108798	0.0121968	0.0180296	0.0251027	0.0313252	0.0367717	0.0367631	0.036915	0.0372015	0.0405491	0.0447944	0.0525749	0.060907	0.0702927	0.0764878	0.08018	0.0872239	0.0959686	0.0950671	0.0929292	0.091	0.108191
0.0314552	0.0228573	0.0185139	0.0149909	0.0147938	0.0154518	0.0176027	0.015441	0.00994966	0.00889612	0.00906149	0.00742729	0.00608671	0.00762221	0.00910737	0.0104529	0.0162741	0.0252698	0.0328034	0.0400421	0.0485562	0.0566363	0.0636274	0.0717516	0.0809011	0.0861482	0.0900612	0.0893034	0.088164	0.0858305	0.0834789	0.0810896	0.0796208	0.0788613	0.0844028	0.0917274	0.108597	0.12505	0.140213	0.149238	0.151183	0.145242	0.135644	0.131977	0.133511	0.167072	0.203117	0.243878	0.281572	0.317032
0.143034	0.120169	0.100427	0.0910367	0.0802417	0.0670758	0.0567656	0.047306	0.0380895	0.0331736	0.0288419	0.0197306	0.0132922	0.00961189	0.0082861	0.00750787	0.00726446	0.00722724	0.00800505	0.0105958	0.0151334	0.0264986	0.0337311	0.0366898	0.0392999	0.0402975	0.0297301	0.0220698	0.0165805	0.0103618	0.0113828	0.01934	0.0266204	0.0335825	0.0375925	0.0453435	0.0631454	0.0776891	0.0911576	0.101481	0.105436	0.0954362	0.0934644	0.0972347	0.141168	0.196797	0.267833	0.334777	0.41553	0.538245
0.0279849	0.0266478	0.0240319	0.0202247	0.0193341	0.0244654	0.0309765	0.0393039	0.0512229	0.0525747	0.0511486	0.0502495	0.0450402	0.0410005	0.0513724	0.0577452	0.0619536	0.0679854	0.0694641	0.0699927	0.0751736	0.0786952	0.0817418	0.0856886	0.0854696	0.082453	0.0779567	0.073475	0.0690148	0.0727678	0.0771378	0.080613	0.0761693	0.0748442	0.0765254	0.0874797	0.0972042	0.105661	0.102269	0.0943221	0.0811717	0.0730693	0.0644966	0.054541	0.0488917	0.0453546	0.044818	0.0435776	0.0416214	0.0368672
0.0592338	0.0525139	0.0572714	0.0731548	0.096066	0.119672	0.130112	0.129226	0.119105	0.106417	0.0907162	0.0818404	0.0744992	0.0640782	0.0531168	0.0418917	0.0307139	0.0230483	0.0182277	0.0210091	0.0264611	0.0345184	0.0419166	0.0469927	0.0487088	0.0507378	0.0533167	0.0570154	0.0637495	0.0692257	0.0679657	0.0642852	0.0590746	0.0478848	0.0410138	0.0399432	0.04694	0.0590681	0.0786196	0.135448	0.219172	0.350687	0.493833	0.628456	0.716595	0.738623	0.719627	0.642386	0.562151	0.48027
0.649748	0.633417	0.576697	0.516098	0.4405	0.375327	0.324232	0.283585	0.248221	0.215791	0.183741	0.15214	0.123181	0.103388	0.0872137	0.0755446	0.0657096	0.0568791	0.0457091	0.0342422	0.0237023	0.0144714	0.0097301	0.00499285	0.000263294	0.00153573	0.00706595	0.00939475	0.0110361	0.0158532	0.020069	0.0226079	0.0246159	0.0260632	0.0284717	0.0312431	0.0279707	0.0239725	0.0254219	0.0268603	0.0282714	0.0420478	0.0678783	0.110154	0.158632	0.210686	0.256571	0.269879	0.269685	0.247954
0.0455003	0.0503372	0.0546678	0.0587149	0.0641117	0.0692357	0.0701917	0.0720537	0.0756481	0.0776961	0.0785283	0.0821472	0.0869468	0.0842241	0.0811062	0.0778646	0.0748384	0.0720964	0.0749996	0.08078	0.0818416	0.0815485	0.0777378	0.0733965	0.0677409	0.0658462	0.067109	0.0675353	0.067857	0.0687492	0.0686523	0.0664895	0.0655643	0.0656105	0.0612781	0.056113	0.0569492	0.0580004	0.0596456	0.0635071	0.0696155	0.0732587	0.0759706	0.0856301	0.097117	0.113096	0.131571	0.154656	0.170273	0.181267
0.0245618	0.0331124	0.0406387	0.0477298	0.083093	0.124579	0.185348	0.24043	0.286373	0.311865	0.323924	0.293082	0.245738	0.202219	0.158611	0.11009	0.0697889	0.0484277	0.0335977	0.024738	0.0201188	0.0169656	0.0146652	0.0124379	0.00951676	0.00783345	0.00798122	0.00901238	0.0112498	0.0106471	0.00857962	0.0071938	0.00628454	0.00597367	0.0052207	0.0048019	0.00515706	0.00384175	0.00112261	0.00664346	0.0147268	0.0278668	0.0485732	0.0851146	0.166647	0.285971	0.432561	0.580007	0.680995	0.7602
0.187192	0.222596	0.260361	0.284169	0.295094	0.276935	0.255134	0.228437	0.209642	0.196031	0.192019	0.231225	0.294747	0.380773	0.472716	0.576134	0.618347	0.64057	0.637689	0.622023	0.597789	0.56481	0.519461	0.463512	0.402424	0.349912	0.307452	0.267613	0.231347	0.200517	0.167796	0.139694	0.12581	0.120407	0.122587	0.14606	0.17835	0.217757	0.265247	0.304641	0.335306	0.344367	0.350733	0.355113	0.379529	0.410344	0.442239	0.460969	0.469405	0.439673
0.0145901	0.0163705	0.0178159	0.0178294	0.0192051	0.0205009	0.0186831	0.0156941	0.0120977	0.00943027	0.00910358	0.0107902	0.0122109	0.013445	0.013679	0.00992363	0.00839203	0.00661644	0.00220311	0.00332435	0.000852841	-0.00206705	-0.00255344	-0.00419729	-0.00295769	0.00246683	0.00574195	0.0103958	0.0127712	0.0103512	0.00752634	0.00607094	0.00642122	0.0118049	0.0153163	0.0185568	0.0218232	0.0276221	0.0363509	0.0444129	0.049114	0.0529044	0.0568993	0.0629843	0.0736218	0.0849291	0.0933044	0.0937824	0.0896818	0.0824572
0.291955	0.326052	0.357609	0.382787	0.4034	0.417304	0.421954	0.418878	0.379485	0.321751	0.260103	0.198925	0.144591	0.100286	0.0734486	0.0562171	0.0500335	0.0464773	0.0441267	0.0431911	0.0423706	0.0336402	0.0248587	0.0163064	0.00953712	0.00499294	0.00396412	0.00586508	0.0128378	0.0213564	0.0282063	0.0338747	0.0359038	0.0373512	0.0381311	0.0404465	0.0438569	0.0436225	0.0426604	0.0450159	0.046231	0.0442851	0.0602428	0.0938244	0.181968	0.302867	0.45645	0.611147	0.722772	0.796263
0.0625859	0.0570519	0.0498342	0.0411838	0.0342394	0.0287373	0.023296	0.0209577	0.0283727	0.0404208	0.0574475	0.0842888	0.119235	0.166637	0.246539	0.340303	0.404854	0.440243	0.411424	0.337668	0.243062	0.182009	0.132292	0.109495	0.0969772	0.0888126	0.0788131	0.0694318	0.0633217	0.0589499	0.0571606	0.0605655	0.0671309	0.068491	0.0686992	0.0684374	0.0674264	0.0625275	0.058287	0.0558995	0.0574936	0.0633635	0.0771102	0.0938897	0.112033	0.128911	0.13115	0.132872	0.130905	0.126762
0.060536	0.0777428	0.0832144	0.0864209	0.0867633	0.0749052	0.0573456	0.045183	0.0345366	0.0305275	0.0293691	0.0371586	0.0458989	0.0557467	0.0599708	0.0613293	0.0516779	0.0404292	0.0282384	0.0191336	0.0197078	0.0216779	0.0251501	0.0339693	0.0463219	0.0501115	0.0520752	0.0548866	0.0544891	0.0459177	0.0375055	0.0292642	0.0240828	0.0203295	0.0269703	0.0346793	0.0434045	0.0503208	0.0543114	0.0533012	0.0489747	0.0474112	0.046448	0.0652665	0.089656	0.133666	0.181543	0.235183	0.260431	0.268439
0.0411471	0.0316198	0.026867	0.0256294	0.0263296	0.0240881	0.0214685	0.0205802	0.0191359	0.0157626	0.0139454	0.0142353	0.0136586	0.0124127	0.0122453	0.0122936	0.0103449	0.00887994	0.008908	0.0122648	0.0194554	0.024946	0.0297215	0.0378381	0.0464157	0.0511683	0.0560454	0.0614738	0.0636801	0.0615117	0.0641207	0.0693708	0.0824465	0.0970167	0.113817	0.124692	0.12327	0.115644	0.102833	0.0899284	0.0769759	0.0902236	0.109595	0.150147	0.188656	0.219127	0.24489	0.259889	0.253104	0.226626
0.110749	0.153445	0.19515	0.234763	0.270431	0.301122	0.295005	0.270204	0.224174	0.175103	0.12952	0.089329	0.070934	0.05688	0.0471458	0.0406029	0.0365528	0.035753	0.0386032	0.0469811	0.0520358	0.0526814	0.0414363	0.0300343	0.0184636	0.012345	0.00854408	0.0174371	0.0259406	0.0267325	0.0256334	0.0211938	0.0137655	0.00419118	0.00404744	0.00792907	0.0100555	0.012236	0.0169088	0.0189587	0.0149357	0.0137079	0.0150453	0.0254982	0.03916	0.0778754	0.120302	0.159236	0.189071	0.197783
0.0240828	0.0203295	0.0269703	0.0346793	0.0434045	0.0503208	0.0543114	0.0533012	0.0489747	0.0474112	0.046448	0.0652665	0.089656	0.133666	0.181543	0.235183	0.260431	0.268439	0.244262	0.208865	0.160005	0.108155	0.0803497	0.0549185	0.0429041	0.0333775	0.0301694	0.0245815	0.0168088	0.0175104	0.0211541	0.0331494	0.045543	0.0577657	0.0624568	0.0625859	0.0570519	0.0498342	0.0411838	0.0342394	0.0287373	0.023296	0.0209577	0.0283727	0.0404208	0.0574475	0.0842888	0.119235	0.166637	0.246539
0.0558995	0.0574936	0.0633635	0.0771102	0.0938897	0.112033	0.128911	0.13115	0.132872	0.130905	0.126762	0.111365	0.0972011	0.084869	0.0675021	0.0438162	0.0264404	0.0119901	0.00294816	-0.00361299	0.0033809	0.00732997	0.0085052	0.0113081	0.0150161	0.015025	0.0173835	0.0247606	0.0280036	0.028282	0.0247337	0.0195667	0.0125868	0.00696879	0.0104909	0.0140041	0.0175071	0.0245618	0.0331124	0.0406387	0.0477298	0.083093	0.124579	0.185348	0.24043	0.286373	0.311865	0.323924	0.293082	0.245738
0.593913	0.64322	0.71146	0.776213	0.83595	0.86844	0.882778	0.868225	0.833913	0.793372	0.744423	0.692823	0.640322	0.60007	0.554192	0.503124	0.445195	0.387205	0.329561	0.277017	0.230337	0.198761	0.169976	0.148124	0.160921	0.187192	0.222596	0.260361	0.284169	0.295094	0.276935	0.255134	0.228437	0.209642	0.196031	0.192019	0.231225	0.294747	0.380773	0.472716	0.576134	0.618347	0.64057	0.637689	0.622023	0.597789	0.56481	0.519461	0.463512	0.402424
0.325393	0.302592	0.281895	0.263481	0.26994	0.276744	0.28391	0.311221	0.34417	0.383701	0.385626	0.379293	0.367814	0.338447	0.307842	0.295215	0.289838	0.290444	0.296548	0.307579	0.3242	0.332238	0.342379	0.36002	0.373711	0.380365	0.363093	0.335919	0.301903	0.256027	0.222978	0.200725	0.217266	0.250548	0.315142	0.425274	0.550974	0.689857	0.797309	0.881059	0.913252	0.907535	0.877908	0.820265	0.749449	0.668811	0.592684	0.526111	0.474583	0.424403
0.0987122	0.109298	0.119496	0.127144	0.125324	0.116689	0.10439	0.0946364	0.0871235	0.0822041	0.0775264	0.0731144	0.0748656	0.0758518	0.0745386	0.0864586	0.101071	0.115751	0.138211	0.164266	0.19845	0.232237	0.265295	0.269032	0.256148	0.214144	0.173573	0.138887	0.135984	0.152865	0.182879	0.246636	0.312676	0.379499	0.415318	0.433381	0.431447	0.448943	0.479673	0.515578	0.552731	0.591163	0.58514	0.57593	0.566063	0.539399	0.510442	0.491785	0.476356	0.459133
0.212711	0.24418	0.270392	0.288424	0.298225	0.283676	0.26582	0.24482	0.259605	0.274704	0.2808	0.285125	0.281895	0.253258	0.235914	0.226224	0.20148	0.182276	0.16925	0.138311	0.116415	0.113473	0.112049	0.111027	0.108499	0.0935803	0.0710967	0.05014	0.034605	0.0237523	0.0167616	0.0216147	0.0541523	0.094168	0.139677	0.196361	0.262069	0.334485	0.422045	0.508721	0.594506	0.637619	0.666488	0.678126	0.666063	0.648603	0.627034	0.576129	0.517188	0.456645
0.146549	0.124903	0.106589	0.0969719	0.0855312	0.0726152	0.0741653	0.073141	0.0688486	0.0655704	0.0580479	0.0432075	0.0336128	0.0267429	0.0228275	0.0321487	0.0493453	0.0685554	0.0858706	0.096229	0.0934928	0.0884959	0.0810333	0.0682589	0.0515238	0.0339519	0.0200387	0.0186114	0.024425	0.0302027	0.0357664	0.0399967	0.0291112	0.0215533	0.0169061	0.00783835	0.0033819	0.00453469	0.0184049	0.0564738	0.116872	0.195296	0.280394	0.358009	0.393821	0.37948	0.342959	0.297201	0.279322	0.261012
0.250478	0.265326	0.259372	0.221092	0.184837	0.151331	0.121776	0.093892	0.0748576	0.0565877	0.0417498	0.0290265	0.0183862	0.0113932	0.00565961	0.00375398	0.00155908	-0.00120488	-0.00493869	-0.00908157	-0.00598492	-0.00244804	0.00110231	0.00473853	0.00859227	0.00986442	0.00837005	0.00745895	0.00923357	0.0141194	0.0135964	0.0119218	0.0131917	0.0175551	0.0290031	0.0452324	0.0661637	0.0891375	0.112233	0.132369	0.166823	0.217926	0.25974	0.301337	0.344083	0.343383	0.333616	0.31789	0.288451	0.243159
0.0688706	0.063661	0.0574811	0.0486847	0.0445088	0.0435628	0.0452042	0.052495	0.078715	0.106943	0.136096	0.175891	0.222207	0.276469	0.333523	0.385131	0.404044	0.39507	0.369323	0.331799	0.298819	0.271379	0.240356	0.211128	0.187514	0.171809	0.157653	0.142166	0.122341	0.0985267	0.0796655	0.0614418	0.0439947	0.0434502	0.0466888	0.0622554	0.0890877	0.122478	0.152511	0.172765	0.186513	0.20289	0.219187	0.235251	0.244741	0.248425	0.237986	0.22562	0.211303	0.218439
0.0485732	0.0851146	0.166647	0.285971	0.432561	0.580007	0.680995	0.7602	0.789377	0.785961	0.761104	0.719307	0.671701	0.5844	0.492225	0.387687	0.295694	0.212903	0.1711	0.132702	0.103894	0.0828871	0.0709195	0.0578441	0.0440433	0.0375263	0.0326258	0.0288805	0.0268373	0.0290984	0.0304171	0.0308082	0.0291937	0.0267126	0.0220731	0.0194543	0.0203809	0.023365	0.0272097	0.0237415	0.0218054	0.0233874	0.0481057	0.0825772	0.149046	0.208763	0.250478	0.265326	0.259372	0.221092
0.343577	0.367396	0.384369	0.381826	0.368392	0.353399	0.347795	0.340238	0.336064	0.357376	0.373546	0.38557	0.39047	0.380406	0.344125	0.299305	0.252377	0.204728	0.164182	0.127607	0.0987938	0.0752267	0.0578057	0.0445794	0.0392744	0.0283139	0.0149343	0.0220823	0.0420176	0.0725317	0.119614	0.138391	0.136371	0.122923	0.117725	0.126257	0.146552	0.196097	0.26482	0.325383	0.360887	0.361257	0.345666	0.315247	0.269413	0.226877	0.184392	0.130239	0.0895093	0.0587339
0.282183	0.257883	0.225643	0.206102	0.194819	0.190588	0.18309	0.169372	0.153102	0.134935	0.119458	0.106681	0.110637	0.114071	0.115807	0.104486	0.0773101	0.0500451	0.0337064	0.0310382	0.031286	0.0339118	0.035305	0.0342113	0.0318413	0.0323773	0.0397159	0.054197	0.0898718	0.111949	0.11946	0.113748	0.0928945	0.0732079	0.0612508	0.0510504	0.0470451	0.061115	0.122507	0.205624	0.296498	0.370946	0.428995	0.43397	0.413499	0.359878	0.311176	0.259956	0.193024	0.136657
0.0239739	0.0231184	0.0300697	0.0489703	0.0769526	0.112435	0.144618	0.173448	0.190338	0.196949	0.188382	0.170263	0.14703	0.118374	0.114414	0.125244	0.150115	0.166996	0.177362	0.172677	0.168508	0.164863	0.165413	0.161419	0.149545	0.128802	0.104315	0.0788036	0.0607637	0.0485317	0.0504727	0.0583131	0.0716957	0.0815979	0.0939531	0.113019	0.0681466	0.00491246	-0.0566627	-0.0321745	0.0393336	0.167375	0.282859	0.389708	0.347503	0.301588	0.266831	0.21614	0.171554	0.146549
NaN	NaN	NaN	NaN	NaN	NaN	NaN	NaN	NaN	NaN	NaN	0.238482	0.297151	0.355684	0.367438	0.368194	0.334693	0.287538	0.22447	0.177252	0.137369	0.120571	0.110079	0.114134	0.123895	0.148134	0.171992	0.195239	0.21903	0.243153	0.238115	0.225978	0.195118	0.161921	0.122822	0.0938233	0.0740673	0.0700483	0.0747835	0.0907187	0.110749	0.153445	0.19515	0.234763	0.270431	0.301122	0.295005	0.270204	0.224174	0.175103
NaN	NaN	NaN	NaN	NaN	NaN	NaN	NaN	NaN	NaN	NaN	NaN	NaN	NaN	NaN	NaN	NaN	NaN	NaN	NaN	NaN	NaN	NaN	NaN	NaN	NaN	NaN	0.238482	0.297151	0.355684	0.367438	0.368194	0.334693	0.287538	0.22447	0.177252	0.137369	0.120571	0.110079	0.114134	0.123895	0.148134	0.171992	0.195239	0.21903	0.243153	0.238115	0.225978	0.195118	0.161921
0.469533	0.436866	0.412234	0.390094	0.37961	0.370202	0.365704	0.360852	0.35552	0.349916	0.344176	0.331698	0.318827	0.309937	0.300983	0.291911	0.282946	0.274051	0.262077	0.250019	0.242921	0.235522	0.227474	0.219481	0.211537	0.199594	0.186565	0.172038	0.157618	0.143464	0.127149	0.108837	0.0945255	0.0813676	0.0660829	0.0529655	0.0463225	0.0400877	0.0342891	0.0311742	0.0291597	0.0234758	0.0176281	0.011792	0.00688341	0.00310849	0.00294566	0.00441781	0.0118609	0.0199265
0.494429	0.42623	0.347697	0.281922	0.226481	0.193162	0.17524	0.165949	0.16582	0.177359	0.196523	0.238646	0.294482	0.379641	0.461662	0.53804	0.587204	0.600144	0.58651	0.552774	0.50599	0.445371	0.376025	0.308221	0.243414	0.188018	0.140719	0.111275	0.0993493	0.100228	0.129285	0.168997	0.214967	0.25092	0.284093	0.31478	0.332226	0.345834	0.354907	0.348357	0.341559	0.339694	0.325894	0.302802	0.257635	0.203808	0.145873	0.102732	0.0690385	0.0435768
0.0100555	0.012236	0.0169088	0.0189587	0.0149357	0.0137079	0.0150453	0.0254982	0.03916	0.0778754	0.120302	0.159236	0.189071	0.197783	0.193453	0.169677	0.142239	0.114282	0.101345	0.0880998	0.074206	0.0618898	0.0504548	0.0452848	0.0409541	0.0398232	0.0415995	0.0484823	0.0522988	0.0544017	0.0590978	0.0635645	0.0607085	0.0570136	0.0495316	0.0407726	0.030261	0.0267892	0.0272551	0.0325608	0.0400065	0.060536	0.0777428	0.0832144	0.0864209	0.0867633	0.0749052	0.0573456	0.045183	0.0345366
0.0504548	0.0452848	0.0409541	0.0398232	0.0415995	0.0484823	0.0522988	0.0544017	0.0590978	0.0635645	0.0607085	0.0570136	0.0495316	0.0407726	0.030261	0.0267892	0.0272551	0.0325608	0.0400065	0.060536	0.0777428	0.0832144	0.0864209	0.0867633	0.0749052	0.0573456	0.045183	0.0345366	0.0305275	0.0293691	0.0371586	0.0458989	0.0557467	0.0599708	0.0613293	0.0516779	0.0404292	0.0282384	0.0191336	0.0197078	0.0216779	0.0251501	0.0339693	0.0463219	0.0501115	0.0520752	0.0548866	0.0544891	0.0459177	0.0375055
0.120571	0.110079	0.114134	0.123895	0.148134	0.171992	0.195239	0.21903	0.243153	0.238115	0.225978	0.195118	0.161921	0.122822	0.0938233	0.0740673	0.0700483	0.0747835	0.0907187	0.110749	0.153445	0.19515	0.234763	0.270431	0.301122	0.295005	0.270204	0.224174	0.175103	0.12952	0.089329	0.070934	0.05688	0.0471458	0.0406029	0.0365528	0.035753	0.0386032	0.0469811	0.0520358	0.0526814	0.0414363	0.0300343	0.0184636	0.012345	0.00854408	0.0174371	0.0259406	0.0267325	0.0256334
0.166607	0.161047	0.15674	0.157838	0.158	0.15708	0.154519	0.150158	0.139414	0.125506	0.110237	0.09662	0.0872188	0.0802724	0.071875	0.0653626	0.0608401	0.0592868	0.0596731	0.0623035	0.0649682	0.0677111	0.0635388	0.0576106	0.0530558	0.049937	0.0483802	0.0469821	0.0466515	0.0476545	0.0430567	0.0395877	0.0382896	0.0365152	0.0345477	0.0339705	0.0334269	0.0325557	0.0320149	0.0320424	0.0330736	0.0333185	0.0333085	0.0321005	0.031348	0.0317172	0.0327616	0.0341902	0.0351456	0.035585
Time relative to onset of a reversal (s)
-20	-19.5	-19	-18.5	-18	-17.5	-17	-16.5	-16	-15.5	-15	-14.5	-14	-13.5	-13	-12.5	-12	-11.5	-11	-10.5	-10	-9.5	-9	-8.5	-8	-7.5	-7	-6.5	-6	-5.5	-5	-4.5	-4	-3.5	-3	-2.5	-2	-1.5	-1	-0.5	0	0.5	1	1.5	2	2.5	3	3.5	4	4.5
Calcium activity in AIY (dR/R0)
0.251838	0.244721	0.236315	0.228613	0.221318	0.208681	0.195181	0.184961	0.175037	0.165992	0.158149	0.151634	0.145302	0.139044	0.135861	0.133151	0.13171	0.13054	0.129699	0.12799	0.125879	0.121542	0.116664	0.110611	0.104702	0.0995739	0.0944314	0.0892611	0.0837648	0.0780284	0.0688536	0.0591582	0.054211	0.0492939	0.044445	0.0415453	0.0403425	0.0389666	0.0375348	0.0360717	0.0347183	0.0337205	0.0327419	0.0317845	0.03275	0.0345255	0.036259	0.0366139	0.0347517	0.0332924
0.101081	0.0940885	0.0822506	0.0666305	0.0567707	0.0496276	0.0457741	0.0418993	0.0376799	0.0327029	0.0318129	0.0318018	0.030668	0.0292942	0.0283132	0.0311915	0.0377159	0.0474867	0.0554756	0.0603246	0.0607007	0.0544397	0.0471357	0.0399336	0.034297	0.0303108	0.0333952	0.0369155	0.0370987	0.0327012	0.0251852	0.0120929	0.000746534	-0.00864196	-0.00386372	0.00430248	0.0162098	0.0312984	0.0423405	0.0431395	0.0452782	0.0470707	0.0466315	0.0480253	0.0506687	0.0482235	0.0457604	0.0449752	0.0422366	0.0404307
0.0700073	0.0695872	0.0770663	0.0829357	0.0888963	0.101591	0.182538	0.31536	0.508334	0.686271	0.849195	0.861461	0.834141	0.760788	0.796788	0.850578	0.909779	0.964086	0.991358	0.867172	0.741932	0.617718	0.52018	0.435683	0.36428	0.334598	0.309498	0.289076	0.271705	0.251436	0.222242	0.19055	0.159214	0.132755	0.111771	0.0952229	0.0904748	0.0913504	0.0964632	0.105878	0.110781	0.11101	0.100385	0.0888428	0.0767259	0.0716488	0.0696621	0.070913	0.0696314	0.0672847
0.0341902	0.0351456	0.035585	0.0347922	0.0325871	0.0300675	0.0278366	0.0267786	0.0287217	0.0318421	0.0360431	0.0416118	0.0476082	0.0493317	0.0508426	0.0516009	0.0515665	0.0492453	0.0467681	0.0441473	0.0414544	0.0388872	0.0398383	0.0404209	0.0401479	0.0415621	0.0442924	0.0462185	0.0478825	0.0600607	0.0702747	0.0754675	0.0799349	0.0837845	0.0772915	0.0687049	0.0659209	0.0632916	0.0609663	0.0608341	0.0627523	0.0602744	0.056619	0.0550974	0.054157	0.0546006	0.0561189	0.0584901	0.0596872	0.0599652
0.0910367	0.0802417	0.0670758	0.0567656	0.047306	0.0380895	0.0331736	0.0288419	0.0197306	0.0132922	0.00961189	0.0082861	0.00750787	0.00726446	0.00722724	0.00800505	0.0105958	0.0151334	0.0264986	0.0337311	0.0366898	0.0392999	0.0402975	0.0297301	0.0220698	0.0165805	0.0103618	0.0113828	0.01934	0.0266204	0.0335825	0.0375925	0.0453435	0.0631454	0.0776891	0.0911576	0.101481	0.105436	0.0954362	0.0934644	0.0972347	0.141168	0.196797	0.267833	0.334777	0.41553	0.538245	0.642036	0.724483	0.756648
0.251904	0.239138	0.22687	0.214874	0.205293	0.196359	0.187097	0.17789	0.168816	0.160279	0.152243	0.141382	0.129691	0.119612	0.111221	0.104523	0.0971103	0.0894546	0.0813325	0.0734775	0.0659206	0.0625944	0.060013	0.0585751	0.0555783	0.0516267	0.0476636	0.0449067	0.0530216	0.085914	0.166861	0.251409	0.338567	0.408415	0.471256	0.460068	0.445169	0.420988	0.401123	0.385258	0.36958	0.353965	0.339662	0.324676	0.307042	0.290142	0.274158	0.259907	0.247311	0.238636
0.0378952	0.049092	0.0681618	0.0842163	0.09653	0.0975181	0.0948683	0.0900638	0.0830955	0.074038	0.0632495	0.0476714	0.0383201	0.0356393	0.038817	0.0439094	0.0515201	0.0549449	0.0568772	0.0586259	0.0695082	0.0843642	0.0945668	0.10789	0.122558	0.117514	0.111168	0.103533	0.0957143	0.0897283	0.0855688	0.0769701	0.0683323	0.0597423	0.0553662	0.0516022	0.0479597	0.0453995	0.0424806	0.0369515	0.0359481	0.0372315	0.0384849	0.0401702	0.0421937	0.0448527	0.0461103	0.0457477	0.0472128	0.0471433
0.381554	0.319516	0.277972	0.281851	0.293415	0.312094	0.320901	0.327147	0.3304	0.36276	0.406093	0.463129	0.480656	0.475038	0.432234	0.365209	0.292109	0.234142	0.195861	0.168663	0.143973	0.11919	0.0938145	0.0669777	0.0416592	0.024461	0.0155238	0.0121733	0.0185657	0.0251348	0.0316207	0.024885	0.017127	0.00752453	-0.00187758	-0.00643217	0.000349205	0.025045	0.0564208	0.0861478	0.108492	0.120539	0.132011	0.12884	0.13325	0.1453	0.163091	0.177482	0.186349	0.176902
0.0205009	0.0186831	0.0156941	0.0120977	0.00943027	0.00910358	0.0107902	0.0122109	0.013445	0.013679	0.00992363	0.00839203	0.00661644	0.00220311	0.00332435	0.000852841	-0.00206705	-0.00255344	-0.00419729	-0.00295769	0.00246683	0.00574195	0.0103958	0.0127712	0.0103512	0.00752634	0.00607094	0.00642122	0.0118049	0.0153163	0.0185568	0.0218232	0.0276221	0.0363509	0.0444129	0.049114	0.0529044	0.0568993	0.0629843	0.0736218	0.0849291	0.0933044	0.0937824	0.0896818	0.0824572	0.0728253	0.0609154	0.052341	0.0469398	0.0389574
NaN	NaN	NaN	NaN	NaN	NaN	NaN	NaN	NaN	NaN	NaN	NaN	NaN	0.501633	0.499362	0.47755	0.447492	0.406517	0.378177	0.367918	0.398631	0.423956	0.445452	0.455219	0.436226	0.386348	0.334677	0.287676	0.250104	0.228373	0.214226	0.212871	0.212465	0.212397	0.211482	0.214582	0.221896	0.249831	0.26686	0.273733	0.286473	0.294795	0.297281	0.314708	0.333533	0.351152	0.348938	0.335601	0.314681	0.283062
0.124903	0.106589	0.0969719	0.0855312	0.0726152	0.0741653	0.073141	0.0688486	0.0655704	0.0580479	0.0432075	0.0336128	0.0267429	0.0228275	0.0321487	0.0493453	0.0685554	0.0858706	0.096229	0.0934928	0.0884959	0.0810333	0.0682589	0.0515238	0.0339519	0.0200387	0.0186114	0.024425	0.0302027	0.0357664	0.0399967	0.0291112	0.0215533	0.0169061	0.00783835	0.0033819	0.00453469	0.0184049	0.0564738	0.116872	0.195296	0.280394	0.358009	0.393821	0.37948	0.342959	0.297201	0.279322	0.261012	0.242037
0.414364	0.601807	0.783578	0.897711	0.971	0.946581	0.912499	0.870486	0.82977	0.788352	0.735516	0.686437	0.644635	0.599692	0.552658	0.506551	0.460776	0.416122	0.376511	0.344065	0.312911	0.282649	0.257811	0.234599	0.216702	0.200102	0.185891	0.171984	0.158275	0.143138	0.129317	0.123773	0.118272	0.112814	0.106886	0.100744	0.0912073	0.0811141	0.0695909	0.0593024	0.0500322	0.0426747	0.0361909	0.0346739	0.0335512	0.033153	0.0321219	0.0307082	0.0293794	0.0281191
0.0147938	0.0154518	0.0176027	0.015441	0.00994966	0.00889612	0.00906149	0.00742729	0.00608671	0.00762221	0.00910737	0.0104529	0.0162741	0.0252698	0.0328034	0.0400421	0.0485562	0.0566363	0.0636274	0.0717516	0.0809011	0.0861482	0.0900612	0.0893034	0.088164	0.0858305	0.0834789	0.0810896	0.0796208	0.0788613	0.0844028	0.0917274	0.108597	0.12505	0.140213	0.149238	0.151183	0.145242	0.135644	0.131977	0.133511	0.167072	0.203117	0.243878	0.281572	0.317032	0.342162	0.364693	0.369259	0.369063
0.0628375	0.060517	0.0562578	0.0515818	0.0467635	0.0462633	0.0465574	0.0481945	0.0507098	0.0551713	0.0638522	0.0767015	0.0917849	0.107719	0.13322	0.15687	0.169196	0.176143	0.17488	0.163115	0.145065	0.129968	0.116727	0.12844	0.149465	0.232552	0.317466	0.405475	0.497796	0.594576	0.65463	0.70121	0.702694	0.691426	0.63539	0.566233	0.478345	0.393267	0.310673	0.248334	0.191996	0.154672	0.119731	0.0930974	0.0691157	0.0504878	0.0326759	0.0155287	0.00536569	-0.00272167
0.0366545	0.0395661	0.0404229	0.0412802	0.0437446	0.0456664	0.0470499	0.044516	0.041124	0.0382576	0.0353042	0.0321326	0.0308187	0.03125	0.034555	0.0368023	0.0369872	0.0380792	0.0401657	0.0402984	0.0396056	0.0383578	0.0372753	0.0402895	0.0410237	0.0400095	0.0396239	0.0392942	0.0369006	0.0352989	0.0355555	0.0354642	0.0350609	0.0321572	0.0284414	0.0272263	0.025973	0.0244534	0.0280142	0.0405368	0.0498494	0.0570416	0.0662456	0.0741322	0.0701498	0.0671454	0.0658764	0.0624049	0.057537	0.0559824
0.096066	0.119672	0.130112	0.129226	0.119105	0.106417	0.0907162	0.0818404	0.0744992	0.0640782	0.0531168	0.0418917	0.0307139	0.0230483	0.0182277	0.0210091	0.0264611	0.0345184	0.0419166	0.0469927	0.0487088	0.0507378	0.0533167	0.0570154	0.0637495	0.0692257	0.0679657	0.0642852	0.0590746	0.0478848	0.0410138	0.0399432	0.04694	0.0590681	0.0786196	0.135448	0.219172	0.350687	0.493833	0.628456	0.716595	0.738623	0.719627	0.642386	0.562151	0.48027	0.406144	0.340133	0.286741	0.236454
0.040542	0.0374228	0.0355772	0.0343124	0.0333712	0.0327147	0.0328176	0.0319203	0.0307613	0.0332532	0.0361144	0.0391908	0.0419846	0.0443125	0.0455734	0.0461605	0.04664	0.0476018	0.0494323	0.0494999	0.0483272	0.0463781	0.0441102	0.0442275	0.0447193	0.0462628	0.0476251	0.0487433	0.0496241	0.0503859	0.0508945	0.0514136	0.0632919	0.0728144	0.0735486	0.0747382	0.0765249	0.06874	0.0562621	0.0534218	0.0513766	0.0480677	0.0454699	0.0444044	0.0421861	0.0389953	0.0367934	0.0349192	0.0347552	0.034669
0.291788	0.282183	0.257883	0.225643	0.206102	0.194819	0.190588	0.18309	0.169372	0.153102	0.134935	0.119458	0.106681	0.110637	0.114071	0.115807	0.104486	0.0773101	0.0500451	0.0337064	0.0310382	0.031286	0.0339118	0.035305	0.0342113	0.0318413	0.0323773	0.0397159	0.054197	0.0898718	0.111949	0.11946	0.113748	0.0928945	0.0732079	0.0612508	0.0510504	0.0470451	0.061115	0.122507	0.205624	0.296498	0.370946	0.428995	0.43397	0.413499	0.359878	0.311176	0.259956	0.193024
0.421079	0.376802	0.328289	0.276008	0.22146	0.165772	0.11152	0.0812546	0.0541615	0.0411471	0.0316198	0.026867	0.0256294	0.0263296	0.0240881	0.0214685	0.0205802	0.0191359	0.0157626	0.0139454	0.0142353	0.0136586	0.0124127	0.0122453	0.0122936	0.0103449	0.00887994	0.008908	0.0122648	0.0194554	0.024946	0.0297215	0.0378381	0.0464157	0.0511683	0.0560454	0.0614738	0.0636801	0.0615117	0.0641207	0.0693708	0.0824465	0.0970167	0.113817	0.124692	0.12327	0.115644	0.102833	0.0899284	0.0769759
0.132017	0.140549	0.149715	0.161268	0.172915	0.181437	0.180695	0.169873	0.151977	0.131101	0.126571	0.137535	0.158001	0.17319	0.180506	0.171198	0.158668	0.144512	0.139228	0.137506	0.139472	0.137965	0.139233	0.160281	0.183569	0.208366	0.235218	0.257208	0.274962	0.285563	0.29482	0.302372	0.290215	0.281635	0.283846	0.274998	0.26177	0.243128	0.211488	0.17193	0.135444	0.104969	0.0798894	0.0653591	0.0564126	0.0532131	0.0516895	0.0478612	0.0408349	0.0405288
0.26994	0.276744	0.28391	0.311221	0.34417	0.383701	0.385626	0.379293	0.367814	0.338447	0.307842	0.295215	0.289838	0.290444	0.296548	0.307579	0.3242	0.332238	0.342379	0.36002	0.373711	0.380365	0.363093	0.335919	0.301903	0.256027	0.222978	0.200725	0.217266	0.250548	0.315142	0.425274	0.550974	0.689857	0.797309	0.881059	0.913252	0.907535	0.877908	0.820265	0.749449	0.668811	0.592684	0.526111	0.474583	0.424403	0.382096	0.356845	0.33419	0.315226
0.334777	0.41553	0.538245	0.642036	0.724483	0.756648	0.756158	0.692892	0.610899	0.53907	0.494544	0.453352	0.413866	0.373709	0.333582	0.29467	0.257263	0.223026	0.192528	0.165327	0.144244	0.124658	0.110315	0.0976809	0.0883502	0.0794602	0.0709137	0.0725106	0.0764192	0.0745477	0.0777146	0.0925631	0.0985293	0.10377	0.128684	0.162278	0.209872	0.258488	0.302682	0.325111	0.317033	0.290418	0.252237	0.222382	0.203906	0.206368	0.215566	0.2505	0.293416	0.356598
0.655478	0.605256	0.557111	0.518347	0.482231	0.449828	0.420767	0.394439	0.369387	0.344704	0.321177	0.297526	0.273524	0.250259	0.228178	0.20747	0.1876	0.174316	0.162354	0.151394	0.142311	0.137147	0.128752	0.117711	0.110831	0.105039	0.0996112	0.0948913	0.0922038	0.0876402	0.0811762	0.0767297	0.0729994	0.0703637	0.0675783	0.0640419	0.0593968	0.0533858	0.048288	0.0435874	0.044429	0.0455331	0.0463884	0.0472947	0.0482734	0.0482266	0.047348	0.0475599	0.0480459	0.0486768
0.0509385	0.0531675	0.0541487	0.0545921	0.0567409	0.059184	0.0604083	0.0606863	0.0586787	0.0558371	0.0522635	0.0481694	0.0452273	0.0446363	0.045626	0.0470227	0.0467522	0.0461629	0.0452522	0.043191	0.0415148	0.0407259	0.0412255	0.0434598	0.0430898	0.0418798	0.0433332	0.0439313	0.0431702	0.0440054	0.0457573	0.0462744	0.0465972	0.0499533	0.0536051	0.0622672	0.0693277	0.0696654	0.0682855	0.0633577	0.0574755	0.0506206	0.0479386	0.0477242	0.0490095	0.0505747	0.0525816	0.0538909	0.0537552	0.0539121
NaN	NaN	NaN	NaN	NaN	NaN	NaN	NaN	NaN	NaN	NaN	NaN	NaN	NaN	NaN	NaN	NaN	NaN	NaN	NaN	NaN	NaN	NaN	NaN	NaN	NaN	NaN	NaN	NaN	NaN	NaN	NaN	NaN	NaN	NaN	NaN	NaN	NaN	NaN	NaN	NaN	NaN	NaN	NaN	NaN	NaN	NaN	NaN	NaN	NaN
NaN	NaN	NaN	NaN	NaN	NaN	NaN	NaN	NaN	NaN	NaN	NaN	NaN	NaN	0.550543	0.682212	0.778602	0.772671	0.73403	0.66055	0.576563	0.501077	0.44716	0.402072	0.363289	0.337225	0.323623	0.317411	0.315245	0.305766	0.290723	0.282869	0.282658	0.290629	0.306958	0.33022	0.362972	0.389508	0.411019	0.424084	0.418038	0.401281	0.367815	0.328346	0.287456	0.254888	0.227265	0.20347	0.185474	0.16255
0.478345	0.393267	0.310673	0.248334	0.191996	0.154672	0.119731	0.0930974	0.0691157	0.0504878	0.0326759	0.0155287	0.00536569	-0.00272167	-0.000709088	0.00286188	0.0112722	0.0191725	0.0261333	0.03276	0.0391362	0.0443476	0.0496295	0.0650991	0.0774973	0.084241	0.0881515	0.0899348	0.0862844	0.0801931	0.0683662	0.0566025	0.0482903	0.0407583	0.0345504	0.0394366	0.0520133	0.0742435	0.100373	0.114319	0.125038	0.122723	0.114708	0.0971061	0.0852809	0.077107	0.0662633	0.0543357	0.0470037	0.0401818
0.294375	0.284898	0.26802	0.247824	0.223122	0.205188	0.192637	0.190647	0.212711	0.24418	0.270392	0.288424	0.298225	0.283676	0.26582	0.24482	0.259605	0.274704	0.2808	0.285125	0.281895	0.253258	0.235914	0.226224	0.20148	0.182276	0.16925	0.138311	0.116415	0.113473	0.112049	0.111027	0.108499	0.0935803	0.0710967	0.05014	0.034605	0.0237523	0.0167616	0.0216147	0.0541523	0.094168	0.139677	0.196361	0.262069	0.334485	0.422045	0.508721	0.594506	0.637619
0.633417	0.576697	0.516098	0.4405	0.375327	0.324232	0.283585	0.248221	0.215791	0.183741	0.15214	0.123181	0.103388	0.0872137	0.0755446	0.0657096	0.0568791	0.0457091	0.0342422	0.0237023	0.0144714	0.0097301	0.00499285	0.000263294	0.00153573	0.00706595	0.00939475	0.0110361	0.0158532	0.020069	0.0226079	0.0246159	0.0260632	0.0284717	0.0312431	0.0279707	0.0239725	0.0254219	0.0268603	0.0282714	0.0420478	0.0678783	0.110154	0.158632	0.210686	0.256571	0.269879	0.269685	0.247954	0.220872
0.299305	0.252377	0.204728	0.164182	0.127607	0.0987938	0.0752267	0.0578057	0.0445794	0.0392744	0.0283139	0.0149343	0.0220823	0.0420176	0.0725317	0.119614	0.138391	0.136371	0.122923	0.117725	0.126257	0.146552	0.196097	0.26482	0.325383	0.360887	0.361257	0.345666	0.315247	0.269413	0.226877	0.184392	0.130239	0.0895093	0.0587339	0.0340672	0.0202287	0.0185356	0.0232903	0.0348331	0.0356636	0.0347921	0.0341087	0.0338393	0.0311075	0.0360418	0.0686627	0.093844	0.118667	0.143451
0.860201	0.822586	0.79052	0.753604	0.714136	0.676074	0.637566	0.596313	0.556435	0.517854	0.474306	0.432402	0.395604	0.361057	0.32767	0.29823	0.271015	0.249107	0.226973	0.205431	0.18888	0.175481	0.166607	0.161047	0.15674	0.157838	0.158	0.15708	0.154519	0.150158	0.139414	0.125506	0.110237	0.09662	0.0872188	0.0802724	0.071875	0.0653626	0.0608401	0.0592868	0.0596731	0.0623035	0.0649682	0.0677111	0.0635388	0.0576106	0.0530558	0.049937	0.0483802	0.0469821
0.056247	0.0648734	0.0886583	0.113247	0.135382	0.155789	0.171843	0.177527	0.173	0.195506	0.227316	0.259468	0.291955	0.326052	0.357609	0.382787	0.4034	0.417304	0.421954	0.418878	0.379485	0.321751	0.260103	0.198925	0.144591	0.100286	0.0734486	0.0562171	0.0500335	0.0464773	0.0441267	0.0431911	0.0423706	0.0336402	0.0248587	0.0163064	0.00953712	0.00499294	0.00396412	0.00586508	0.0128378	0.0213564	0.0282063	0.0338747	0.0359038	0.0373512	0.0381311	0.0404465	0.0438569	0.0436225
0.0326258	0.0288805	0.0268373	0.0290984	0.0304171	0.0308082	0.0291937	0.0267126	0.0220731	0.0194543	0.0203809	0.023365	0.0272097	0.0237415	0.0218054	0.0233874	0.0481057	0.0825772	0.149046	0.208763	0.250478	0.265326	0.259372	0.221092	0.184837	0.151331	0.121776	0.093892	0.0748576	0.0565877	0.0417498	0.0290265	0.0183862	0.0113932	0.00565961	0.00375398	0.00155908	-0.00120488	-0.00493869	-0.00908157	-0.00598492	-0.00244804	0.00110231	0.00473853	0.00859227	0.00986442	0.00837005	0.00745895	0.00923357	0.0141194
0.230199	0.20658	0.187762	0.167472	0.146719	0.125698	0.104519	0.0830258	0.0655109	0.0512276	0.0444441	0.0398744	0.0386198	0.037443	0.0366614	0.0362597	0.0366218	0.0397291	0.046468	0.0710769	0.0980989	0.127815	0.160623	0.195555	0.207404	0.214433	0.21835	0.227004	0.248317	0.298213	0.358668	0.410148	0.453801	0.480183	0.49189	0.490715	0.486026	0.480908	0.479892	0.482336	0.493164	0.486434	0.46298	0.431978	0.398224	0.343819	0.289976	0.250347	0.212253	0.176615
0.176987	0.15324	0.135181	0.118752	0.106524	0.0973325	0.0909484	0.0856189	0.0808871	0.0737594	0.0668233	0.0609282	0.0567261	0.0543611	0.0495652	0.0438186	0.0409487	0.0372671	0.0290139	0.0232422	0.0192971	0.0158458	0.012608	0.0280013	0.0483853	0.0933657	0.149609	0.214719	0.247257	0.279528	0.316208	0.355035	0.394699	0.464475	0.543849	0.614669	0.675654	0.705318	0.718251	0.721188	0.714141	0.718771	0.729221	0.716304	0.695429	0.667759	0.62467	0.576703	0.521239	0.464785
0.242309	0.209972	0.188508	0.176661	0.175601	0.184185	0.192921	0.188593	0.174119	0.154642	0.136936	0.121043	0.113731	0.0898689	0.0659114	0.0468756	0.0458322	0.0499826	0.0584759	0.071361	0.071026	0.0644649	0.0552585	0.0484146	0.0405577	0.0313801	0.025844	0.0226419	0.021756	0.024413	0.0285519	0.0348714	0.0475271	0.0554524	0.0585429	0.0640223	0.064668	0.0589782	0.0600463	0.061586	0.0625601	0.0672549	0.073486	0.0785799	0.0787137	0.0752877	0.0666436	0.0581741	0.0498602	0.0397111
0.120055	0.104631	0.0861911	0.0629712	0.0466188	0.034623	0.0294072	0.0271007	0.025319	0.0222509	0.0352595	0.0563653	0.0827277	0.112357	0.142717	0.158154	0.167009	0.170044	0.163328	0.147488	0.11563	0.0960907	0.0811001	0.0690656	0.0704983	0.0788316	0.0800158	0.0828816	0.0878316	0.0937101	0.0987803	0.102136	0.101362	0.100322	0.102716	0.101654	0.0995098	0.109654	0.118376	0.125792	0.135417	0.140538	0.139934	0.117504	0.0994669	0.0946306	0.090891	0.0905451	0.106143	0.109461
0.0373512	0.0381311	0.0404465	0.0438569	0.0436225	0.0426604	0.0450159	0.046231	0.0442851	0.0602428	0.0938244	0.181968	0.302867	0.45645	0.611147	0.722772	0.796263	0.783036	0.73438	0.637982	0.532614	0.422316	0.334444	0.25322	0.212016	0.172342	0.138575	0.111103	0.0921351	0.0732997	0.0545311	0.0490441	0.0452839	0.0424154	0.040115	0.0397809	0.038465	0.0360226	0.0366326	0.0386425	0.0379353	0.037077	0.0415316	0.04449	0.0428479	0.0401412	0.0361091	0.0452125	0.0609059	0.0839021
0.0537552	0.0539121	0.0543041	0.0526509	0.0506096	0.0533015	0.0557995	0.0572958	0.0575733	0.0562179	0.0535709	0.0503154	0.04621	0.0428383	0.0444898	0.0451676	0.0441702	0.0454027	0.0480323	0.0440986	0.039238	0.0375789	0.0354207	0.0321493	0.0321333	0.0347917	0.0349359	0.0344468	0.0351357	0.0364823	0.0394642	0.0427638	0.0463649	0.0503496	0.0537833	0.0541367	0.0549571	0.0560375	0.0542075	0.0515628	0.0478495	0.0432091	0.0389992	0.0404533	0.0409096	0.0393235	0.0448616	0.0561259	0.0620017	0.0666259
0.340303	0.404854	0.440243	0.411424	0.337668	0.243062	0.182009	0.132292	0.109495	0.0969772	0.0888126	0.0788131	0.0694318	0.0633217	0.0589499	0.0571606	0.0605655	0.0671309	0.068491	0.0686992	0.0684374	0.0674264	0.0625275	0.058287	0.0558995	0.0574936	0.0633635	0.0771102	0.0938897	0.112033	0.128911	0.13115	0.132872	0.130905	0.126762	0.111365	0.0972011	0.084869	0.0675021	0.0438162	0.0264404	0.0119901	0.00294816	-0.00361299	0.0033809	0.00732997	0.0085052	0.0113081	0.0150161	0.015025
0.648603	0.627034	0.576129	0.517188	0.456645	0.408811	0.366594	0.327223	0.301318	0.282896	0.262696	0.248132	0.240826	0.216535	0.191507	0.168636	0.152991	0.148329	0.170777	0.210137	0.255928	0.300656	0.329977	0.344916	0.343503	0.332882	0.30992	0.305081	0.307026	0.318154	0.340223	0.369705	0.413119	0.455337	0.497138	0.545204	0.593913	0.64322	0.71146	0.776213	0.83595	0.86844	0.882778	0.868225	0.833913	0.793372	0.744423	0.692823	0.640322	0.60007
0.0222225	0.0293659	0.0371541	0.0455503	0.0623454	0.0767183	0.0846284	0.0828635	0.0759489	0.0650363	0.0624222	0.0665299	0.0888162	0.107379	0.122178	0.129658	0.131699	0.127042	0.125217	0.12227	0.115853	0.104191	0.0917479	0.0827089	0.0731542	0.0634845	0.0580383	0.0507386	0.0413983	0.0348924	0.0292656	0.0247786	0.0234857	0.0241343	0.0282335	0.0353868	0.0423906	0.042049	0.0386284	0.0333328	0.032818	0.0342643	0.0376607	0.0408	0.0402774	0.0312225	0.0240298	0.0184047	0.0175735	0.0181296
0.0615117	0.0641207	0.0693708	0.0824465	0.0970167	0.113817	0.124692	0.12327	0.115644	0.102833	0.0899284	0.0769759	0.0902236	0.109595	0.150147	0.188656	0.219127	0.24489	0.259889	0.253104	0.226626	0.201452	0.176729	0.138239	0.102245	0.0829771	0.0669824	0.0562507	0.048502	0.0447957	0.0406975	0.0362708	0.0349264	0.0345335	0.0353268	0.0364944	0.0392057	0.04206	0.0451871	0.0462517	0.045728	0.0408671	0.0348547	0.0251179	0.0178689	0.0182736	0.0209248	0.0271757	0.0358592	0.0469434
0.0864209	0.0867633	0.0749052	0.0573456	0.045183	0.0345366	0.0305275	0.0293691	0.0371586	0.0458989	0.0557467	0.0599708	0.0613293	0.0516779	0.0404292	0.0282384	0.0191336	0.0197078	0.0216779	0.0251501	0.0339693	0.0463219	0.0501115	0.0520752	0.0548866	0.0544891	0.0459177	0.0375055	0.0292642	0.0240828	0.0203295	0.0269703	0.0346793	0.0434045	0.0503208	0.0543114	0.0533012	0.0489747	0.0474112	0.046448	0.0652665	0.089656	0.133666	0.181543	0.235183	0.260431	0.268439	0.244262	0.208865	0.160005
0.0471458	0.0406029	0.0365528	0.035753	0.0386032	0.0469811	0.0520358	0.0526814	0.0414363	0.0300343	0.0184636	0.012345	0.00854408	0.0174371	0.0259406	0.0267325	0.0256334	0.0211938	0.0137655	0.00419118	0.00404744	0.00792907	0.0100555	0.012236	0.0169088	0.0189587	0.0149357	0.0137079	0.0150453	0.0254982	0.03916	0.0778754	0.120302	0.159236	0.189071	0.197783	0.193453	0.169677	0.142239	0.114282	0.101345	0.0880998	0.074206	0.0618898	0.0504548	0.0452848	0.0409541	0.0398232	0.0415995	0.0484823
0.166823	0.217926	0.25974	0.301337	0.344083	0.343383	0.333616	0.31789	0.288451	0.243159	0.199093	0.155831	0.112141	0.0813537	0.0643452	0.0493227	0.0357319	0.0288534	0.022658	0.0174702	0.0146028	0.0130206	0.00898584	0.00587907	0.00859138	0.0108798	0.0121968	0.0180296	0.0251027	0.0313252	0.0367717	0.0367631	0.036915	0.0372015	0.0405491	0.0447944	0.0525749	0.060907	0.0702927	0.0764878	0.08018	0.0872239	0.0959686	0.0950671	0.0929292	0.091	0.108191	0.161769	0.234796	0.31771
NaN	NaN	NaN	NaN	NaN	NaN	NaN	NaN	NaN	NaN	NaN	NaN	NaN	NaN	NaN	NaN	NaN	NaN	NaN	NaN	NaN	NaN	NaN	NaN	NaN	NaN	NaN	NaN	NaN	NaN	NaN	NaN	NaN	NaN	NaN	0.238482	0.297151	0.355684	0.367438	0.368194	0.334693	0.287538	0.22447	0.177252	0.137369	0.120571	0.110079	0.114134	0.123895	0.148134
0.03916	0.0778754	0.120302	0.159236	0.189071	0.197783	0.193453	0.169677	0.142239	0.114282	0.101345	0.0880998	0.074206	0.0618898	0.0504548	0.0452848	0.0409541	0.0398232	0.0415995	0.0484823	0.0522988	0.0544017	0.0590978	0.0635645	0.0607085	0.0570136	0.0495316	0.0407726	0.030261	0.0267892	0.0272551	0.0325608	0.0400065	0.060536	0.0777428	0.0832144	0.0864209	0.0867633	0.0749052	0.0573456	0.045183	0.0345366	0.0305275	0.0293691	0.0371586	0.0458989	0.0557467	0.0599708	0.0613293	0.0516779
0.0489747	0.0474112	0.046448	0.0652665	0.089656	0.133666	0.181543	0.235183	0.260431	0.268439	0.244262	0.208865	0.160005	0.108155	0.0803497	0.0549185	0.0429041	0.0333775	0.0301694	0.0245815	0.0168088	0.0175104	0.0211541	0.0331494	0.045543	0.0577657	0.0624568	0.0625859	0.0570519	0.0498342	0.0411838	0.0342394	0.0287373	0.023296	0.0209577	0.0283727	0.0404208	0.0574475	0.0842888	0.119235	0.166637	0.246539	0.340303	0.404854	0.440243	0.411424	0.337668	0.243062	0.182009	0.132292
0.226224	0.20148	0.182276	0.16925	0.138311	0.116415	0.113473	0.112049	0.111027	0.108499	0.0935803	0.0710967	0.05014	0.034605	0.0237523	0.0167616	0.0216147	0.0541523	0.094168	0.139677	0.196361	0.262069	0.334485	0.422045	0.508721	0.594506	0.637619	0.666488	0.678126	0.666063	0.648603	0.627034	0.576129	0.517188	0.456645	0.408811	0.366594	0.327223	0.301318	0.282896	0.262696	0.248132	0.240826	0.216535	0.191507	0.168636	0.152991	0.148329	0.170777	0.210137
0.120638	0.103632	0.0827688	0.0587639	0.0382117	0.0199445	0.00587027	0.00381473	0.00947099	0.0281996	0.0482459	0.0683719	0.0786029	0.0887115	0.0987122	0.109298	0.119496	0.127144	0.125324	0.116689	0.10439	0.0946364	0.0871235	0.0822041	0.0775264	0.0731144	0.0748656	0.0758518	0.0745386	0.0864586	0.101071	0.115751	0.138211	0.164266	0.19845	0.232237	0.265295	0.269032	0.256148	0.214144	0.173573	0.138887	0.135984	0.152865	0.182879	0.246636	0.312676	0.379499	0.415318	0.433381
0.576134	0.618347	0.64057	0.637689	0.622023	0.597789	0.56481	0.519461	0.463512	0.402424	0.349912	0.307452	0.267613	0.231347	0.200517	0.167796	0.139694	0.12581	0.120407	0.122587	0.14606	0.17835	0.217757	0.265247	0.304641	0.335306	0.344367	0.350733	0.355113	0.379529	0.410344	0.442239	0.460969	0.469405	0.439673	0.397146	0.340368	0.290161	0.240411	0.188884	0.163731	0.145815	0.126824	0.118368	0.113082	0.0956822	0.0885865	0.0891314	0.0867785	0.0960001
0.58651	0.552774	0.50599	0.445371	0.376025	0.308221	0.243414	0.188018	0.140719	0.111275	0.0993493	0.100228	0.129285	0.168997	0.214967	0.25092	0.284093	0.31478	0.332226	0.345834	0.354907	0.348357	0.341559	0.339694	0.325894	0.302802	0.257635	0.203808	0.145873	0.102732	0.0690385	0.0435768	0.0284635	0.019533	0.0178626	0.0285675	0.0425395	0.0621743	0.0747235	0.0851004	0.0987559	0.104679	0.105977	0.10979	0.110382	0.106111	0.10369	0.103553	0.107651	0.120789
0.292161	0.267443	0.246133	0.228626	0.215549	0.199408	0.16903	0.148955	0.133364	0.116968	0.106502	0.102083	0.0851698	0.0695148	0.056483	0.0435384	0.0331622	0.0278601	0.0239739	0.0231184	0.0300697	0.0489703	0.0769526	0.112435	0.144618	0.173448	0.190338	0.196949	0.188382	0.170263	0.14703	0.118374	0.114414	0.125244	0.150115	0.166996	0.177362	0.172677	0.168508	0.164863	0.165413	0.161419	0.149545	0.128802	0.104315	0.0788036	0.0607637	0.0485317	0.0504727	0.0583131
0.0169656	0.0146652	0.0124379	0.00951676	0.00783345	0.00798122	0.00901238	0.0112498	0.0106471	0.00857962	0.0071938	0.00628454	0.00597367	0.0052207	0.0048019	0.00515706	0.00384175	0.00112261	0.00664346	0.0147268	0.0278668	0.0485732	0.0851146	0.166647	0.285971	0.432561	0.580007	0.680995	0.7602	0.789377	0.785961	0.761104	0.719307	0.671701	0.5844	0.492225	0.387687	0.295694	0.212903	0.1711	0.132702	0.103894	0.0828871	0.0709195	0.0578441	0.0440433	0.0375263	0.0326258	0.0288805	0.0268373
0.0709137	0.0725106	0.0764192	0.0745477	0.0777146	0.0925631	0.0985293	0.10377	0.128684	0.162278	0.209872	0.258488	0.302682	0.325111	0.317033	0.290418	0.252237	0.222382	0.203906	0.206368	0.215566	0.2505	0.293416	0.356598	0.42982	0.519319	0.612398	0.707146	0.798939	0.882748	0.945937	0.976176	0.990918	0.930253	0.847709	0.737582	0.63514	0.537766	0.455837	0.378468	0.306631	0.254835	0.205317	0.158812	0.137255	0.121286	0.112077	0.10378	0.0969042	0.0821017
0.126762	0.111365	0.0972011	0.084869	0.0675021	0.0438162	0.0264404	0.0119901	0.00294816	-0.00361299	0.0033809	0.00732997	0.0085052	0.0113081	0.0150161	0.015025	0.0173835	0.0247606	0.0280036	0.028282	0.0247337	0.0195667	0.0125868	0.00696879	0.0104909	0.0140041	0.0175071	0.0245618	0.0331124	0.0406387	0.0477298	0.083093	0.124579	0.185348	0.24043	0.286373	0.311865	0.323924	0.293082	0.245738	0.202219	0.158611	0.11009	0.0697889	0.0484277	0.0335977	0.024738	0.0201188	0.0169656	0.0146652
0.0215533	0.0169061	0.00783835	0.0033819	0.00453469	0.0184049	0.0564738	0.116872	0.195296	0.280394	0.358009	0.393821	0.37948	0.342959	0.297201	0.279322	0.261012	0.242037	0.226899	0.211107	0.193954	0.179731	0.166909	0.156613	0.152453	0.149236	0.142477	0.135315	0.127076	0.112423	0.0933057	0.0717466	0.0526832	0.0340877	0.0174174	0.0251802	0.0279254	0.0261126	0.0293127	0.0279964	0.0193371	0.0250058	0.0370482	0.0606133	0.0926684	0.128861	0.169599	0.209411	0.242917	0.265457
0.465421	0.422254	0.399795	0.383543	0.369808	0.380344	0.392846	0.368668	0.346697	0.326113	0.311406	0.306306	0.313518	0.317333	0.313858	0.297833	0.273236	0.24521	0.213303	0.191905	0.176807	0.171791	0.192553	0.226992	0.266659	0.300012	0.326334	0.311553	0.288526	0.257287	0.230813	0.205929	0.182736	0.160341	0.138226	0.116008	0.107206	0.11111	0.118661	0.127886	0.139127	0.127665	0.10609	0.0796267	0.0520526	0.0266476	0.0305017	0.0367244	0.0448492	0.0471087
0.090942	0.113903	0.149426	0.190588	0.229806	0.250781	0.25853	0.250688	0.238935	0.223535	0.213065	0.204928	0.199652	0.18577	0.168854	0.149565	0.133996	0.121278	0.123404	0.137449	0.162538	0.188526	0.210913	0.228266	0.242499	0.246723	0.230478	0.207503	0.178509	0.136432	0.103115	0.0764813	0.0728422	0.0807449	0.103385	0.140554	0.170893	0.186622	0.184268	0.176519	0.16465	0.163172	0.166772	0.186591	0.207695	0.229919	0.272828	0.306528	0.329895	0.336788
NaN	NaN	NaN	NaN	NaN	NaN	NaN	NaN	NaN	NaN	NaN	NaN	NaN	NaN	NaN	NaN	NaN	NaN	NaN	NaN	NaN	NaN	NaN	NaN	NaN	NaN	NaN	NaN	NaN	NaN	NaN	NaN	NaN	NaN	NaN	NaN	NaN	NaN	NaN	NaN	NaN	NaN	NaN	NaN	NaN	NaN	NaN	NaN	NaN	NaN
NaN	NaN	NaN	NaN	NaN	NaN	NaN	NaN	NaN	NaN	NaN	NaN	NaN	NaN	NaN	NaN	NaN	NaN	NaN	NaN	NaN	NaN	NaN	NaN	NaN	NaN	NaN	NaN	NaN	NaN	NaN	NaN	NaN	NaN	NaN	NaN	NaN	NaN	NaN	NaN	NaN	NaN	NaN	NaN	NaN	NaN	NaN	NaN	NaN	NaN
0.060013	0.0585751	0.0555783	0.0516267	0.0476636	0.0449067	0.0530216	0.085914	0.166861	0.251409	0.338567	0.408415	0.471256	0.460068	0.445169	0.420988	0.401123	0.385258	0.36958	0.353965	0.339662	0.324676	0.307042	0.290142	0.274158	0.259907	0.247311	0.238636	0.230502	0.223115	0.215552	0.207902	0.20354	0.200047	0.199519	0.199225	0.199298	0.1979	0.195149	0.192644	0.190208	0.189977	0.190215	0.191932	0.193986	0.196712	0.200537	0.205562	0.209328	0.212574
0.0938145	0.0669777	0.0416592	0.024461	0.0155238	0.0121733	0.0185657	0.0251348	0.0316207	0.024885	0.017127	0.00752453	-0.00187758	-0.00643217	0.000349205	0.025045	0.0564208	0.0861478	0.108492	0.120539	0.132011	0.12884	0.13325	0.1453	0.163091	0.177482	0.186349	0.176902	0.159308	0.135131	0.118295	0.106916	0.107816	0.113701	0.127463	0.147807	0.167842	0.179762	0.185659	0.186135	0.161268	0.138956	0.121019	0.120668	0.132153	0.162517	0.195747	0.22883	0.258357	0.278355
NaN	NaN	NaN	NaN	NaN	NaN	NaN	NaN	0.238482	0.297151	0.355684	0.367438	0.368194	0.334693	0.287538	0.22447	0.177252	0.137369	0.120571	0.110079	0.114134	0.123895	0.148134	0.171992	0.195239	0.21903	0.243153	0.238115	0.225978	0.195118	0.161921	0.122822	0.0938233	0.0740673	0.0700483	0.0747835	0.0907187	0.110749	0.153445	0.19515	0.234763	0.270431	0.301122	0.295005	0.270204	0.224174	0.175103	0.12952	0.089329	0.070934
0.148134	0.171992	0.195239	0.21903	0.243153	0.238115	0.225978	0.195118	0.161921	0.122822	0.0938233	0.0740673	0.0700483	0.0747835	0.0907187	0.110749	0.153445	0.19515	0.234763	0.270431	0.301122	0.295005	0.270204	0.224174	0.175103	0.12952	0.089329	0.070934	0.05688	0.0471458	0.0406029	0.0365528	0.035753	0.0386032	0.0469811	0.0520358	0.0526814	0.0414363	0.0300343	0.0184636	0.012345	0.00854408	0.0174371	0.0259406	0.0267325	0.0256334	0.0211938	0.0137655	0.00419118	0.00404744
NaN	NaN	NaN	NaN	NaN	NaN	NaN	NaN	NaN	NaN	NaN	NaN	NaN	NaN	NaN	NaN	NaN	NaN	NaN	NaN	NaN	NaN	NaN	NaN	NaN	NaN	NaN	NaN	NaN	NaN	NaN	NaN	NaN	NaN	NaN	NaN	NaN	NaN	NaN	NaN	NaN	NaN	NaN	NaN	NaN	NaN	NaN	NaN	NaN	NaN
NaN	NaN	NaN	NaN	NaN	NaN	NaN	NaN	NaN	NaN	NaN	NaN	NaN	NaN	NaN	NaN	NaN	NaN	NaN	NaN	NaN	NaN	NaN	NaN	NaN	NaN	NaN	NaN	NaN	NaN	NaN	NaN	NaN	NaN	NaN	NaN	NaN	NaN	NaN	NaN	NaN	NaN	0.239383	0.440525	0.685126	0.861682	0.968761	0.995456	0.994102	0.947326
[truncated: 131 more columns]

## Sheet: Fig 4-AVA abl
Time relative to onset of a forward run (s)
-20	-19.5	-19	-18.5	-18	-17.5	-17	-16.5	-16	-15.5	-15	-14.5	-14	-13.5	-13	-12.5	-12	-11.5	-11	-10.5	-10	-9.5	-9	-8.5	-8	-7.5	-7	-6.5	-6	-5.5	-5	-4.5	-4	-3.5	-3	-2.5	-2	-1.5	-1	-0.5	0	0.5	1	1.5	2	2.5	3	3.5	4	4.5
Calcium activity in AIY (dR/R0)
0.139855	0.137718	0.135581	0.133444	0.156185	0.190929	0.242	0.275035	0.297012	0.287073	0.252858	0.205159	0.167904	0.135784	0.110619	0.095419	0.0810447	0.0700287	0.0589475	0.0478055	0.0401512	0.0344588	0.0308162	0.0254262	0.0214612	0.0188692	0.0167254	0.0153342	0.0145589	0.0129848	0.0113781	0.0101902	0.0136884	0.016765	0.0195069	0.0220037	0.0220209	0.0198832	0.0194693	0.0199368	0.0211326	0.0263355	0.0875603	0.200933	0.39649	0.554686	0.681994	0.690133	0.653548	0.568332
0.00950919	0.0100743	0.0132019	0.0146273	0.0145427	0.01436	0.0151593	0.0169384	0.0202794	0.0225891	0.0238011	0.0260575	0.0283369	0.0284505	0.0307049	0.0335898	0.0338937	0.0341977	0.0345017	0.0348056	0.0348338	0.0338537	0.0325927	0.0319592	0.0331233	0.0357085	0.0395136	0.0409265	0.0408242	0.0389913	0.0380983	0.0381051	0.0405939	0.0512683	0.0681286	0.0745267	0.0809248	0.0873229	0.093721	0.100119	0.205831	0.410837	0.597813	0.748703	0.868009	0.862196	0.7981	0.718331	0.657416	0.603536
0.0980063	0.0799515	0.0685772	0.0582375	0.0478593	0.0427855	0.0386264	0.0352827	0.0344847	0.0339332	0.0333382	0.0325202	0.0317655	0.0313249	0.0294983	0.0272883	0.0251672	0.0237933	0.0229241	0.0227715	0.0212067	0.01914	0.0167075	0.0147998	0.013602	0.0137252	0.0151207	0.01705	0.0192841	0.0221017	0.0247669	0.0266042	0.0279808	0.0284888	0.0275119	0.0265664	0.0250868	0.0221077	0.0199116	0.0182313	0.0172738	0.0229161	0.047891	0.174496	0.385318	0.652744	0.863763	0.971076	0.997026	0.89096
0.160644	0.150763	0.143408	0.141238	0.141168	0.142639	0.145914	0.16291	0.183003	0.204052	0.225318	0.237592	0.242095	0.228307	0.214307	0.201375	0.191872	0.194555	0.196435	0.192519	0.184328	0.170559	0.154373	0.142148	0.137707	0.139429	0.149252	0.168766	0.181262	0.195525	0.214826	0.226816	0.233221	0.235048	0.218461	0.19701	0.173021	0.153439	0.14401	0.138847	0.133888	0.125783	0.113513	0.0987511	0.0900277	0.0849737	0.08259	0.0810005	0.0800579	0.0785049
0.109587	0.11512	0.11594	0.116759	0.117579	0.118398	0.117482	0.112376	0.0966659	0.087195	0.0820319	0.0833349	0.0875361	0.0924852	0.0974934	0.0971166	0.0958083	0.0936037	0.0902601	0.0846844	0.092106	0.102083	0.105955	0.109827	0.113698	0.11757	0.123397	0.138694	0.139996	0.134862	0.130462	0.126392	0.122887	0.128819	0.13535	0.142348	0.152388	0.163297	0.166263	0.166837	0.166183	0.164063	0.161943	0.159824	0.157704	0.155584	0.153465	0.14692	0.139861	0.132539
0.0757333	0.0706118	0.058412	0.0433882	0.0291214	0.0198633	0.0131063	0.0112009	0.00891404	0.00583277	0.00578404	0.00597408	0.00586779	0.00692755	0.00951961	0.0101613	0.00997153	0.00938145	0.00879136	0.00820127	0.00761118	0.00706647	0.00679336	0.00661446	0.00668525	0.00750987	0.00800027	0.00819437	0.00803786	0.0083468	0.00897554	0.0103365	0.0125372	0.0161158	0.0208154	0.0301926	0.036164	0.0401121	0.0440602	0.0480082	0.0520325	0.0584094	0.059275	0.0550407	0.047981	0.0424207	0.0384898	0.036299	0.0364199	0.0397924
0.221907	0.202625	0.173341	0.140452	0.106951	0.0766511	0.0538073	0.0366837	0.023997	0.0168374	0.0112909	0.0069026	0.00439753	0.00255422	0.00103356	-0.000375063	-0.00263912	-0.00406392	-0.00477333	-0.00517291	-0.00315812	-0.00114868	-0.000655228	0.00340372	0.00662622	0.0093324	0.0130667	0.0130005	0.0118852	0.011678	0.00798525	0.00675495	0.00715544	0.0071286	0.00630822	0.00411516	9.9031e-05	0.000668359	0.015232	0.054446	0.161327	0.291336	0.404526	0.489171	0.486923	0.459639	0.41395	0.375824	0.348575	0.324707
0.208145	0.204052	0.191402	0.168179	0.144006	0.125645	0.114582	0.106151	0.102644	0.100575	0.098586	0.0992078	0.100937	0.104251	0.109665	0.117385	0.119362	0.115984	0.107983	0.0933436	0.0829699	0.0753251	0.0672664	0.0602244	0.0530465	0.0460547	0.0407387	0.0411654	0.0419865	0.0423792	0.0434013	0.040738	0.0382259	0.0376658	0.0404919	0.0481396	0.0587112	0.0698961	0.07723	0.0891546	0.187554	0.393004	0.615608	0.785881	0.847588	0.798495	0.709654	0.647919	0.620777	0.632988
0.267762	0.273772	0.282638	0.294028	0.387115	0.522243	0.625318	0.706568	0.762598	0.691518	0.617361	0.541283	0.480908	0.42725	0.379975	0.34267	0.312373	0.289566	0.276285	0.268302	0.265599	0.265451	0.267493	0.271919	0.272363	0.273945	0.276597	0.279229	0.289636	0.308483	0.333932	0.405971	0.555278	0.659272	0.745118	0.802466	0.75265	0.667797	0.580055	0.509207	0.446935	0.397367	0.358274	0.326399	0.313744	0.303934	0.296623	0.299848	0.301791	0.30258
0.0849185	0.0773281	0.0737854	0.0709016	0.0770395	0.0895822	0.107156	0.122148	0.123295	0.116792	0.104669	0.0998976	0.100417	0.107064	0.120427	0.149009	0.194975	0.258783	0.341479	0.417366	0.474359	0.512102	0.513251	0.498629	0.471997	0.4351	0.387051	0.32436	0.263701	0.210236	0.168106	0.138045	0.117711	0.105264	0.0983682	0.0939119	0.0876956	0.079127	0.0758072	0.0760249	0.0794348	0.0859241	0.0902647	0.0874706	0.0827373	0.0857853	0.0882028	0.0945578	0.115857	0.219884
0.142119	0.146177	0.145118	0.139737	0.127589	0.118915	0.11362	0.112349	0.119689	0.126814	0.133864	0.141335	0.14445	0.147839	0.153883	0.158516	0.165259	0.174262	0.189458	0.212474	0.245928	0.296516	0.327066	0.346103	0.354052	0.339012	0.317601	0.296333	0.278612	0.264053	0.250528	0.227341	0.201346	0.173575	0.144104	0.133024	0.129185	0.134093	0.173241	0.229322	0.306064	0.385143	0.425526	0.433618	0.410407	0.378912	0.345655	0.319054	0.299549	0.280907
0.0103925	0.00996287	0.00743004	0.00518933	0.00425303	0.00135378	-0.000164826	0.00118757	0.00246038	0.00431366	0.00733137	0.00921216	0.00973988	0.00767587	0.00613442	0.00505942	0.00474692	0.00673814	0.00909308	0.0106407	0.0102115	0.00932389	0.00902845	0.00862963	0.00908717	0.0124339	0.0135212	0.0136913	0.0133049	0.0120635	0.0111145	0.0124649	0.0130555	0.013623	0.0148951	0.0153529	0.0163891	0.0216625	0.025682	0.02905	0.0325878	0.0340013	0.0340803	0.0334452	0.034635	0.0371019	0.0407713	0.0472275	0.0577937	0.132432
0.451061	0.362966	0.287915	0.226468	0.183118	0.145305	0.115011	0.0977911	0.0890981	0.0843876	0.0821195	0.0802978	0.0786308	0.079775	0.084972	0.0931581	0.100131	0.106156	0.111472	0.12396	0.135997	0.146603	0.154454	0.1513	0.145874	0.138742	0.130114	0.12321	0.118286	0.115741	0.115308	0.11542	0.115695	0.114742	0.114221	0.109331	0.0965146	0.0888521	0.0869479	0.0931847	0.111471	0.127491	0.142119	0.146177	0.145118	0.139737	0.127589	0.118915	0.11362	0.112349
0.00834065	0.00648827	0.00558502	0.00608534	0.00631718	0.00624893	0.00389597	0.00131747	-0.00141459	-0.00248279	-0.00297401	-0.00255157	-0.00133851	-0.000455224	-0.000921997	-0.000891477	-0.00060542	0.000235576	0.00189708	0.00387493	0.00539602	0.00501242	0.00387642	0.00368773	0.0042557	0.00567557	0.0105334	0.0149005	0.0186112	0.0199393	0.01993	0.0190783	0.018187	0.0173908	0.0166747	0.0167832	0.0173589	0.0187965	0.0259424	0.038377	0.0582577	0.269588	0.45127	0.602693	0.713207	0.729662	0.633093	0.556718	0.48784	0.427333
NaN	NaN	NaN	NaN	NaN	NaN	NaN	NaN	NaN	NaN	NaN	NaN	NaN	NaN	NaN	NaN	NaN	NaN	NaN	NaN	NaN	NaN	NaN	NaN	NaN	NaN	NaN	NaN	0.263957	0.25362	0.247959	0.246892	0.248965	0.246983	0.248896	0.254408	0.258818	0.273096	0.298289	0.426518	0.547666	0.656327	0.721058	0.721414	0.653956	0.592112	0.538765	0.494716	0.462743	0.435587
0.0563358	0.0540616	0.0528047	0.0509495	0.0504792	0.0529056	0.0598927	0.0679878	0.0748012	0.078801	0.078866	0.0794886	0.082567	0.0875475	0.0942952	0.0573581	0.0361644	0.0375093	0.0386804	0.0693232	0.106783	0.106767	0.104628	0.102154	0.102161	0.112235	0.150336	0.23589	0.378313	0.481677	0.53558	0.51614	0.409703	0.323811	0.249145	0.190486	0.152044	0.124962	0.104634	0.0936038	0.0952675	0.108651	0.130043	0.161677	0.208144	0.23326	0.24012	0.23332	0.204858	0.185308
0.0668707	0.0590612	0.0489813	0.0383509	0.0355771	0.0346262	0.033776	0.0317338	0.0295713	0.0279102	0.0280676	0.0343242	0.0345721	0.0366042	0.0430622	0.0485559	0.0920408	0.202242	0.511113	0.738234	0.901221	0.994827	0.877496	0.758634	0.639985	0.541689	0.449828	0.367648	0.300906	0.253055	0.212567	0.178752	0.151849	0.132849	0.117948	0.106596	0.098146	0.0969044	0.0969737	0.0965237	0.0935212	0.0849185	0.0773281	0.0737854	0.0709016	0.0770395	0.0895822	0.107156	0.122148	0.123295
0.048199	0.0473498	0.0544597	0.0578385	0.0596826	0.0615267	0.0633708	0.0652149	0.0729004	0.0775494	0.0784187	0.0780051	0.0784366	0.0812514	0.0876381	0.0938125	0.098075	0.102609	0.10744	0.103711	0.0996701	0.0939999	0.0862982	0.0811047	0.0761992	0.0712937	0.0663883	0.0611587	0.049068	0.0390681	0.0313401	0.0280002	0.0231937	0.016338	0.0122436	0.00864387	0.00533217	0.00890244	0.0122866	0.01521	0.0202367	0.0367089	0.0453344	0.0492171	0.0530998	0.0569824	0.061281	0.0717322	0.0779653	0.0804779
0.15554	0.147097	0.146847	0.166507	0.191553	0.215977	0.230651	0.233773	0.236504	0.242004	0.273026	0.313188	0.359499	0.385588	0.394466	0.388968	0.361706	0.345626	0.331995	0.318056	0.308885	0.297899	0.285077	0.282085	0.290018	0.303583	0.31313	0.330111	0.351547	0.376065	0.405079	0.430182	0.448054	0.446773	0.44275	0.437285	0.419953	0.399597	0.37367	0.342804	0.312663	0.290981	0.266191	0.245614	0.233197	0.228464	0.231457	0.241046	0.254321	0.268615
0.42686	0.368293	0.314047	0.26589	0.226963	0.191248	0.159694	0.137545	0.12058	0.105913	0.0922716	0.0840262	0.0756431	0.0670864	0.0582368	0.0499009	0.0436694	0.0395169	0.0367147	0.0346603	0.0329603	0.031613	0.0325116	0.0337085	0.033874	0.0312755	0.0276727	0.0248803	0.024076	0.0284457	0.0324211	0.0355814	0.0379171	0.040971	0.0466991	0.0526442	0.0569339	0.055847	0.0522224	0.0509909	0.0671655	0.110196	0.177989	0.275098	0.377514	0.458263	0.512457	0.516555	0.478297	0.431332
0.0329603	0.031613	0.0325116	0.0337085	0.033874	0.0312755	0.0276727	0.0248803	0.024076	0.0284457	0.0324211	0.0355814	0.0379171	0.040971	0.0466991	0.0526442	0.0569339	0.055847	0.0522224	0.0509909	0.0671655	0.110196	0.177989	0.275098	0.377514	0.458263	0.512457	0.516555	0.478297	0.431332	0.391459	0.356977	0.331569	0.309494	0.281947	0.255972	0.22603	0.19292	0.163278	0.139047	0.127398	0.129834	0.151175	0.190707	0.236543	0.279514	0.332753	0.37855	0.420407	0.462276
0.0106061	0.011694	0.0166859	0.0212134	0.0253641	0.0289629	0.0288645	0.0264366	0.0229079	0.0214917	0.0216068	0.0230161	0.0218617	0.0211196	0.0201326	0.0165309	0.0157342	0.0159471	0.0163943	0.0202665	0.0236431	0.0266624	0.0303575	0.0417185	0.0652939	0.0996183	0.126889	0.146685	0.155979	0.142947	0.13186	0.121663	0.112042	0.105388	0.101489	0.100061	0.102322	0.101693	0.102173	0.106261	0.220167	0.424003	0.667317	0.842227	0.913321	0.897581	0.801741	0.74608	0.697135	0.655199
0.19292	0.163278	0.139047	0.127398	0.129834	0.151175	0.190707	0.236543	0.279514	0.332753	0.37855	0.420407	0.462276	0.472831	0.458518	0.425985	0.372623	0.313171	0.256965	0.213672	0.181772	0.153333	0.128029	0.105389	0.0911254	0.0791236	0.0668707	0.0590612	0.0489813	0.0383509	0.0355771	0.0346262	0.033776	0.0317338	0.0295713	0.0279102	0.0280676	0.0343242	0.0345721	0.0366042	0.0430622	0.0485559	0.0920408	0.202242	0.511113	0.738234	0.901221	0.994827	0.877496	0.758634
Time relative to onset of a reversal (s)
-20	-19.5	-19	-18.5	-18	-17.5	-17	-16.5	-16	-15.5	-15	-14.5	-14	-13.5	-13	-12.5	-12	-11.5	-11	-10.5	-10	-9.5	-9	-8.5	-8	-7.5	-7	-6.5	-6	-5.5	-5	-4.5	-4	-3.5	-3	-2.5	-2	-1.5	-1	-0.5	0	0.5	1	1.5	2	2.5	3	3.5	4	4.5
Calcium activity in AIY (dR/R0)
0.0259725	0.0275305	0.0343085	0.114069	0.261765	0.516526	0.722615	0.888465	0.899068	0.851407	0.740392	0.660453	0.592547	0.538879	0.501735	0.466891	0.430866	0.390684	0.350395	0.311221	0.280399	0.253445	0.23304	0.221866	0.216608	0.22505	0.304948	0.423284	0.550703	0.712355	0.896722	0.96209	1.00969	1.03831	0.964261	0.905465	0.858582	0.784635	0.718115	0.66832	0.666135	0.707146	0.819128	0.911174	0.973066	0.983309	0.907624	0.804725	0.700924	0.615939
0.0102601	0.0108431	0.011426	0.0121051	0.0158631	0.0175759	0.0174743	0.0172546	0.018215	0.0203528	0.0243672	0.0271426	0.0285988	0.0313101	0.034049	0.0341855	0.0368943	0.0403608	0.040726	0.0410912	0.0414565	0.0418217	0.0418556	0.0406779	0.0391627	0.0384015	0.0398003	0.0429066	0.0474787	0.0491764	0.0490535	0.0468512	0.0457781	0.0457863	0.0487768	0.0616029	0.0818619	0.0895497	0.0972375	0.104925	0.112613	0.120301	0.247323	0.493653	0.718319	0.899626	1.04298	1.036	0.958981	0.863132
0.149164	0.125834	0.103868	0.0847335	0.0726788	0.0617207	0.0507217	0.0453445	0.0409367	0.037393	0.0365472	0.0359628	0.0353322	0.0344653	0.0336654	0.0331984	0.0312626	0.0289204	0.0266725	0.0252164	0.0242952	0.0241335	0.0224751	0.0202847	0.0177068	0.0156849	0.0144155	0.0145461	0.0160251	0.0180697	0.0204375	0.0234236	0.0262482	0.0281954	0.0296543	0.0301928	0.0291574	0.0281553	0.0265873	0.02343	0.0211025	0.0193217	0.0183069	0.0242867	0.0507553	0.184933	0.408364	0.691785	0.915425	1.02916
0.342254	0.338015	0.344704	0.350331	0.35129	0.345424	0.328578	0.302893	0.290178	0.276675	0.262614	0.248246	0.231705	0.217453	0.206844	0.203715	0.203613	0.205735	0.210459	0.234973	0.263954	0.294314	0.324987	0.34269	0.349186	0.329298	0.309106	0.290453	0.276746	0.280616	0.283328	0.277679	0.265864	0.246005	0.22266	0.205027	0.198622	0.201104	0.215274	0.243419	0.261443	0.282016	0.309854	0.327147	0.336386	0.339021	0.315097	0.284157	0.249556	0.221312
0.397981	0.333621	0.294517	0.265717	0.259111	0.253023	0.246183	0.242625	0.242264	0.237777	0.238073	0.243572	0.269618	0.28323	0.285247	0.287263	0.28928	0.291296	0.289041	0.27648	0.237828	0.214526	0.201823	0.205029	0.215365	0.227542	0.239863	0.238936	0.235717	0.230294	0.222067	0.208349	0.226609	0.251156	0.260681	0.270207	0.279732	0.289257	0.303594	0.34123	0.344433	0.3318	0.320977	0.310963	0.302338	0.316935	0.333001	0.350219	0.374922	0.401761
0.327607	0.297532	0.261979	0.221107	0.198237	0.179465	0.160156	0.131549	0.114987	0.108866	0.102746	0.0966252	0.0905048	0.0843843	0.069805	0.0518509	0.0348013	0.0237375	0.0156626	0.0133856	0.0106527	0.00697043	0.00691219	0.00713929	0.00701228	0.00827873	0.0113764	0.0121433	0.0119164	0.0112113	0.0105061	0.00980089	0.00909571	0.00844476	0.00811837	0.00790458	0.00798917	0.00897464	0.00956068	0.00979265	0.0096056	0.0099748	0.0107262	0.0123525	0.0149825	0.0192591	0.0248753	0.0360815	0.0432177	0.0479358
0.763293	0.681228	0.596678	0.530502	0.480551	0.444002	0.420575	0.398037	0.379327	0.364075	0.345026	0.326818	0.307783	0.28104	0.240423	0.194807	0.14834	0.106315	0.0746303	0.0508801	0.0332837	0.0233534	0.0156605	0.00957385	0.00609934	0.00354269	0.00143354	-0.00052021	-0.00366044	-0.00563663	-0.00662057	-0.00717478	-0.00438029	-0.00159322	-0.000908796	0.00472093	0.00919052	0.012944	0.0181234	0.0180316	0.0164847	0.0161973	0.0110755	0.00936907	0.00992454	0.00988731	0.00874945	0.0057077	0.000137355	0.000927009
0.125026	0.153188	0.290735	0.431846	0.560863	0.660505	0.615456	0.567336	0.528291	0.5067	0.475201	0.433915	0.383685	0.32404	0.288233	0.268584	0.262761	0.270632	0.275213	0.269802	0.253076	0.22237	0.190408	0.16613	0.151502	0.140355	0.135718	0.132982	0.130352	0.131175	0.133461	0.137843	0.145002	0.155209	0.157823	0.153356	0.142778	0.123421	0.109704	0.0995964	0.0889409	0.0796299	0.0701391	0.0608944	0.0538655	0.0544297	0.0555154	0.0560346	0.0573861	0.0538645
0.0575555	0.0704324	0.161393	0.308273	0.534066	0.726323	0.890152	1.00987	1.02485	1.00183	0.962095	0.892744	0.815281	0.748573	0.688847	0.634033	0.586733	0.542975	0.504428	0.46762	0.431434	0.395078	0.363831	0.33724	0.323304	0.321088	0.324572	0.326318	0.333643	0.344448	0.358329	0.471772	0.636451	0.762068	0.861086	0.929368	0.842745	0.75237	0.659654	0.586076	0.520684	0.46307	0.417608	0.380685	0.352891	0.336705	0.326976	0.323682	0.323502	0.325991
0.0400921	0.0403816	0.0427552	0.0502985	0.0567154	0.107508	0.236227	0.597002	0.862288	1.05266	1.162	1.02495	0.886116	0.747529	0.632716	0.525418	0.429428	0.351471	0.295579	0.248287	0.20879	0.177365	0.155173	0.137769	0.124509	0.114639	0.113188	0.113269	0.112744	0.109237	0.0991884	0.0903225	0.0861845	0.082816	0.0899854	0.104636	0.125162	0.142673	0.144013	0.136418	0.122258	0.116685	0.117292	0.125055	0.140663	0.174049	0.227739	0.302269	0.398862	0.487501
0.216614	0.211808	0.207411	0.210429	0.224138	0.245731	0.264123	0.280017	0.29404	0.326981	0.358731	0.386708	0.407417	0.399096	0.384784	0.365973	0.343213	0.325	0.312013	0.3053	0.304156	0.304453	0.30518	0.302664	0.301289	0.288391	0.254585	0.234373	0.22935	0.245801	0.294035	0.336292	0.374878	0.385582	0.382789	0.368597	0.336552	0.313672	0.299705	0.296351	0.315714	0.334508	0.353105	0.372811	0.381028	0.389968	0.40591	0.418131	0.435918	0.459666
0.298576	0.270113	0.243621	0.221282	0.206667	0.198666	0.203011	0.20759	0.207518	0.193577	0.171618	0.146482	0.120893	0.103017	0.0887735	0.0783732	0.0694243	0.0613013	0.0541802	0.0499373	0.0476096	0.0469047	0.0477156	0.0499401	0.0462952	0.0421774	0.0377046	0.0327044	0.0287961	0.0262621	0.0239473	0.0213469	0.0183869	0.0148265	0.0126133	0.0120919	0.0090178	0.00629826	0.00516188	0.00164308	-0.000200048	0.00144135	0.00298615	0.00523547	0.00889805	0.0111807	0.0118212	0.00931616	0.00744531	0.00614059
NaN	NaN	NaN	NaN	NaN	NaN	NaN	NaN	NaN	NaN	NaN	NaN	NaN	NaN	NaN	NaN	NaN	NaN	NaN	NaN	NaN	NaN	NaN	NaN	NaN	NaN	NaN	NaN	NaN	NaN	NaN	NaN	NaN	NaN	NaN	NaN	NaN	NaN	NaN	NaN	NaN	NaN	NaN	NaN	NaN	1.22645	0.98692	0.782852	0.615775	0.497905
0.0287361	0.0251903	0.020394	0.0148156	0.00836118	0.00471033	0.00248279	0.00104168	0.000879056	0.00145975	0.00253378	0.00394008	0.00624298	0.0109398	0.0134882	0.0150828	0.015705	0.0137832	0.0109291	0.0085838	0.00713812	0.00586542	0.00388054	0.00241822	0.00153995	0.00213435	0.00421237	0.00646585	0.00715047	0.00897761	0.0112387	0.0130225	0.0151289	0.0169091	0.0162399	0.0146234	0.0125702	0.0127768	0.0147108	0.0184459	0.0252394	0.0306031	0.0345574	0.0317648	0.0285397	0.0250632	0.0209258	0.0175195	0.0152245	0.0115767
NaN	NaN	NaN	NaN	NaN	NaN	NaN	NaN	NaN	NaN	NaN	NaN	NaN	NaN	NaN	NaN	NaN	NaN	NaN	NaN	NaN	NaN	NaN	NaN	NaN	NaN	NaN	NaN	NaN	NaN	NaN	NaN	NaN	NaN	NaN	NaN	NaN	NaN	NaN	NaN	NaN	NaN	NaN	NaN	NaN	NaN	NaN	NaN	NaN	NaN
0.0541748	0.0552554	0.0557722	0.0571174	0.0536123	0.0503063	0.0495692	0.0532885	0.0633531	0.0772655	0.0919852	0.101637	0.11733	0.246826	0.517204	0.810158	1.03424	1.11545	1.05084	0.933925	0.85268	0.81696	0.83303	0.872584	0.889951	0.871968	0.813977	0.75	0.710463	0.696032	0.7075	0.742468	0.74337	0.711678	0.646828	0.541395	0.435631	0.339901	0.272098	0.221251	0.18599	0.163847	0.149011	0.134388	0.121234	0.114987	0.104905	0.0957286	0.0878324	0.0792018
0.0412831	0.043993	0.0475364	0.0541824	0.0610801	0.0660573	0.0647962	0.0605908	0.0591619	0.0779284	0.127855	0.206511	0.31918	0.438008	0.531697	0.594576	0.59933	0.554941	0.500451	0.454188	0.41418	0.384701	0.359089	0.327127	0.296991	0.26225	0.223834	0.189442	0.161329	0.147813	0.150639	0.1754	0.221267	0.274448	0.324305	0.386074	0.43921	0.487775	0.536353	0.548599	0.531993	0.494247	0.432334	0.363355	0.298142	0.247912	0.2109	0.177903	0.148545	0.122277
1.25411	1.08206	0.891536	0.764742	0.659983	0.570178	0.508093	0.467401	0.442959	0.426323	0.415998	0.386289	0.358499	0.333461	0.334797	0.337839	0.342149	0.34646	0.35077	0.35508	0.373214	0.40423	0.40982	0.409436	0.405295	0.380052	0.359782	0.344806	0.330135	0.316371	0.305422	0.288127	0.279188	0.31422	0.327644	0.331898	0.336153	0.340407	0.344662	0.348916	0.362963	0.3696	0.354526	0.361329	0.374408	0.393129	0.392805	0.380372	0.356741	0.33021
0.315645	0.314211	0.300759	0.265503	0.244425	0.239186	0.256343	0.306646	0.350715	0.390956	0.402119	0.399207	0.384405	0.350986	0.327125	0.312559	0.309061	0.329255	0.348854	0.368249	0.3888	0.397369	0.406694	0.423319	0.436064	0.454614	0.479381	0.521184	0.584497	0.676526	0.815689	0.899732	0.9521	0.973968	0.932592	0.873694	0.815188	0.766438	0.726386	0.689181	0.625397	0.553886	0.477491	0.396417	0.365938	0.355378	0.368878	0.476571	0.630846	0.841956
0.00700372	0.00772926	0.00837512	0.00797767	0.00667572	0.00461303	0.00290291	0.00296321	0.00546262	0.00960293	0.0117259	0.0129287	0.0184477	0.0234533	0.0280422	0.032021	0.0319122	0.0292279	0.0253267	0.023761	0.0238882	0.0254463	0.02417	0.0233496	0.0222584	0.0182764	0.0173956	0.0176309	0.0181253	0.0224064	0.0261394	0.0294776	0.0335629	0.0461234	0.0721881	0.110137	0.140287	0.162173	0.172449	0.15804	0.145783	0.134509	0.123873	0.116515	0.112205	0.110627	0.113126	0.11243	0.112961	0.117481
0.0256641	0.0240775	0.0242064	0.0257852	0.0244919	0.0236606	0.0225549	0.0185198	0.0176273	0.0178657	0.0183668	0.0227049	0.0264877	0.0298703	0.03401	0.0467378	0.0731497	0.111604	0.142156	0.164334	0.174746	0.160145	0.147725	0.136301	0.125523	0.118068	0.1137	0.1121	0.114633	0.113928	0.114466	0.119046	0.246656	0.475017	0.747605	0.943559	1.02321	1.00557	0.898201	0.835843	0.78101	0.734028	0.682548	0.615343	0.542219	0.478217	0.412604	0.351831	0.29788	0.254269
0.340543	0.346933	0.363356	0.387034	0.415997	0.422011	0.423885	0.422473	0.419413	0.426401	0.42952	0.423255	0.392524	0.361213	0.327199	0.288084	0.247333	0.205663	0.164107	0.129376	0.10214	0.0795076	0.0605497	0.0528239	0.0439952	0.0352073	0.0302498	0.0235464	0.0187677	0.0165212	0.016098	0.0173933	0.0200217	0.02404	0.0255212	0.0264195	0.0269727	0.0273266	0.0259616	0.0245283	0.0227881	0.0177301	0.015844	0.0147857	0.0132115	0.0140565	0.0136157	0.0129531	0.0135221	0.0119679
0.120527	0.249724	0.480925	0.756904	0.955295	1.03593	1.01808	0.909373	0.84624	0.790725	0.743158	0.691037	0.622997	0.548963	0.484165	0.417736	0.356207	0.301585	0.257432	0.216923	0.181133	0.15601	0.136768	0.120132	0.104659	0.0953066	0.0857981	0.0760926	0.066055	0.0566	0.049532	0.044822	0.0416436	0.0393134	0.0373851	0.035857	0.0368762	0.0382338	0.0384215	0.0354741	0.0313877	0.0282205	0.0273082	0.0322645	0.0367736	0.0403581	0.0430074	0.0464713	0.0529684	0.0597116
[truncated: 131 more columns]

## Sheet: Fig 4-AVA_AVE_RIM abl
Time relative to onset of a forward run (s)
-20	-19.5	-19	-18.5	-18	-17.5	-17	-16.5	-16	-15.5	-15	-14.5	-14	-13.5	-13	-12.5	-12	-11.5	-11	-10.5	-10	-9.5	-9	-8.5	-8	-7.5	-7	-6.5	-6	-5.5	-5	-4.5	-4	-3.5	-3	-2.5	-2	-1.5	-1	-0.5	0	0.5	1	1.5	2	2.5	3	3.5	4	4.5
Calcium activity in AIY (dR/R0)
0.440349	0.433219	0.416382	0.394825	0.367517	0.346532	0.331123	0.33508	0.352439	0.384707	0.424954	0.461445	0.495535	0.494422	0.476018	0.444727	0.408713	0.373844	0.339316	0.304525	0.269689	0.256191	0.243674	0.227732	0.215282	0.230356	0.246754	0.269518	0.286231	0.282862	0.279949	0.278329	0.272148	0.247766	0.231368	0.24028	0.250337	0.26307	0.273149	0.278519	0.279962	0.273031	0.265664	0.256309	0.248153	0.243793	0.243053	0.250728	0.255594	0.251596
0.254857	0.255345	0.240562	0.214936	0.195926	0.18026	0.161623	0.141973	0.121789	0.101403	0.0806961	0.0599218	0.0657597	0.0750014	0.0998197	0.124057	0.125284	0.123751	0.103071	0.0841852	0.0714404	0.0669115	0.0986255	0.132069	0.173069	0.210679	0.237895	0.251279	0.236093	0.217024	0.192237	0.172202	0.157207	0.1523	0.155688	0.161358	0.169062	0.163976	0.150658	0.140799	0.132511	0.131549	0.132553	0.139262	0.146988	0.146287	0.144734	0.169127	0.194344	0.22057
0.913895	0.878317	0.815695	0.74867	0.73384	0.722452	0.715212	0.709171	0.713856	0.716261	0.708309	0.702731	0.703943	0.701758	0.692353	0.685991	0.684188	0.687127	0.695185	0.683899	0.657465	0.621482	0.580571	0.517511	0.446701	0.408817	0.378121	0.373034	0.370799	0.390675	0.414175	0.437659	0.459934	0.463125	0.466149	0.468145	0.466303	0.450883	0.432332	0.399556	0.365991	0.331505	0.312949	0.307919	0.319359	0.340842	0.355621	0.367541	0.348916	0.320667
0.155098	0.158813	0.194393	0.229972	0.290213	0.350568	0.380971	0.409309	0.396162	0.381132	0.348128	0.317117	0.295545	0.282181	0.295571	0.304561	0.29527	0.285882	0.275944	0.26331	0.24185	0.244196	0.298454	0.363413	0.444777	0.529963	0.620116	0.703291	0.77576	0.834366	0.877625	0.904272	0.916469	0.895895	0.854753	0.790243	0.71539	0.634355	0.551312	0.482159	0.41615	0.362914	0.311512	0.293225	0.275663	0.234648	0.195487	0.170825	0.144345	0.110246
0.181667	0.192928	0.206537	0.22676	0.258573	0.326726	0.386999	0.430651	0.475866	0.527247	0.559598	0.543686	0.521055	0.477383	0.429954	0.374608	0.325665	0.286246	0.264987	0.263292	0.252684	0.235107	0.22583	0.2216	0.213943	0.203607	0.205881	0.215833	0.215574	0.214926	0.198441	0.180422	0.138279	0.107073	0.0950911	0.0893324	0.0966418	0.105631	0.116453	0.138014	0.163228	0.218507	0.280913	0.375302	0.452983	0.507853	0.550617	0.590377	0.587941	0.584182
0.175024	0.151089	0.140654	0.131844	0.105173	0.0794882	0.063738	0.0791741	0.129497	0.174474	0.216604	0.260624	0.297791	0.29705	0.299694	0.306759	0.318329	0.330942	0.359711	0.390847	0.432396	0.46528	0.469732	0.466981	0.437265	0.427773	0.434604	0.451909	0.475821	0.508949	0.546985	0.548983	0.543745	0.50312	0.459114	0.415805	0.372614	0.330888	0.301741	0.295491	0.30997	0.351352	0.396475	0.447336	0.48451	0.506532	0.492563	0.449807	0.40987	0.371549
0.380294	0.362002	0.337695	0.313076	0.31119	0.310173	0.322365	0.341438	0.409758	0.474629	0.525959	0.581627	0.649466	0.7027	0.704985	0.704277	0.696681	0.669565	0.611084	0.564453	0.531544	0.494969	0.455292	0.412598	0.368074	0.353041	0.351721	0.343739	0.333696	0.340028	0.349873	0.314851	0.273861	0.23574	0.198936	0.189628	0.184116	0.205713	0.232079	0.277192	0.30821	0.303552	0.287361	0.239016	0.189177	0.136487	0.091626	0.0631893	0.0418827	0.0311208
0.212986	0.212247	0.200302	0.187999	0.173235	0.156827	0.130122	0.106408	0.0948171	0.080538	0.0585104	0.0418444	0.0444118	0.0451716	0.0416612	0.054671	0.0948882	0.122828	0.136192	0.152041	0.170208	0.204983	0.250931	0.316495	0.397397	0.465995	0.527708	0.556736	0.573167	0.58318	0.591597	0.597679	0.603384	0.621466	0.642228	0.616884	0.585406	0.554453	0.52352	0.468157	0.413362	0.454835	0.496309	0.509014	0.521458	0.537785	0.547063	0.513959	0.484683	0.488962
0.245326	0.254374	0.258567	0.264881	0.272048	0.276247	0.27958	0.274119	0.267154	0.255832	0.243507	0.225788	0.207425	0.211441	0.216531	0.231291	0.246976	0.293707	0.34497	0.36311	0.378894	0.399766	0.417195	0.390857	0.364147	0.32661	0.286851	0.225587	0.170019	0.14187	0.125519	0.173883	0.223397	0.280389	0.332801	0.368336	0.399871	0.421773	0.440252	0.452989	0.45526	0.444893	0.426522	0.399959	0.385553	0.380941	0.42342	0.495578	0.544624	0.584358
0.269682	0.30286	0.318758	0.329584	0.324558	0.319184	0.312933	0.311643	0.313362	0.30717	0.296155	0.274809	0.269173	0.270829	0.283177	0.297558	0.310715	0.313614	0.304579	0.294281	0.283396	0.274899	0.269882	0.276881	0.286162	0.29944	0.311954	0.324143	0.33394	0.341676	0.343554	0.34305	0.337079	0.329133	0.317403	0.306503	0.29734	0.287857	0.278213	0.334754	0.398423	0.461456	0.520883	0.566493	0.567438	0.525157	0.516785	0.523849	0.612468	0.710241
0.125793	0.134097	0.13131	0.121633	0.105711	0.0890032	0.0717387	0.0492151	0.0257253	0.011571	-0.00112872	-0.00321329	-0.00443964	0.00851067	0.0229595	0.0475853	0.0707773	0.0803361	0.0891688	0.0959917	0.101321	0.105674	0.137938	0.178795	0.2119	0.243944	0.252274	0.257358	0.234824	0.21529	0.200174	0.191828	0.191247	0.193278	0.195787	0.209054	0.223455	0.281667	0.339036	0.392214	0.441423	0.475387	0.477791	0.4541	0.465838	0.484066	0.490864	0.495943	0.494458	0.459962
0.756995	0.811889	0.826773	0.838546	0.824205	0.809863	0.722276	0.633323	0.546901	0.460725	0.387395	0.317132	0.282435	0.250339	0.231994	0.226137	0.260217	0.299068	0.348074	0.413276	0.502852	0.576292	0.633533	0.693645	0.755845	0.785937	0.788525	0.78655	0.779994	0.768867	0.754418	0.700629	0.627935	0.537785	0.437739	0.376846	0.332734	0.337638	0.356383	0.401556	0.451096	0.443007	0.423744	0.40064	0.372202	0.341446	0.30688	0.301915	0.334809	0.38534
0.468102	0.409255	0.339131	0.29186	0.247614	0.214887	0.18856	0.182614	0.19752	0.230161	0.263039	0.296009	0.321023	0.339822	0.329779	0.322837	0.319242	0.308351	0.294905	0.265819	0.228734	0.192834	0.160048	0.135232	0.135108	0.152775	0.176233	0.193354	0.196567	0.205235	0.225468	0.269441	0.337099	0.419358	0.509831	0.578825	0.631776	0.619452	0.606629	0.590192	0.571055	0.542101	0.518256	0.506582	0.492291	0.474857	0.461773	0.452501	0.434186	0.407321
0.399872	0.36239	0.334464	0.307981	0.306228	0.305383	0.292676	0.279117	0.258669	0.238549	0.221773	0.206831	0.200799	0.192801	0.168931	0.148252	0.141262	0.136462	0.137586	0.143455	0.16519	0.181752	0.176289	0.170522	0.163929	0.156861	0.148836	0.142439	0.139796	0.141916	0.151712	0.164111	0.179532	0.198492	0.220447	0.25528	0.297901	0.331013	0.360088	0.378494	0.393943	0.380294	0.362002	0.337695	0.313076	0.31119	0.310173	0.322365	0.341438	0.409758
0.533793	0.478193	0.43859	0.398373	0.357307	0.325736	0.30366	0.270837	0.23022	0.218725	0.232077	0.249425	0.268331	0.325066	0.38681	0.425069	0.461328	0.48287	0.496075	0.482792	0.460602	0.4194	0.408243	0.414032	0.438236	0.467638	0.516406	0.568346	0.577743	0.584795	0.59718	0.604495	0.585311	0.569957	0.566759	0.550771	0.507702	0.467551	0.428902	0.376299	0.320654	0.259331	0.204476	0.187399	0.171712	0.160401	0.162088	0.171722	0.17434	0.173638
0.511633	0.478547	0.451485	0.425507	0.418983	0.41714	0.421141	0.419439	0.392717	0.358846	0.305468	0.272488	0.251601	0.259365	0.271408	0.28664	0.296446	0.28985	0.277536	0.253548	0.233278	0.222172	0.207898	0.188186	0.169549	0.153126	0.136303	0.117749	0.100127	0.0850407	0.0827225	0.107116	0.131294	0.154936	0.173821	0.183842	0.182973	0.166681	0.15528	0.152066	0.171669	0.218757	0.268817	0.321695	0.367794	0.409275	0.421035	0.418366	0.420186	0.422905
0.295869	0.319097	0.339343	0.35025	0.360279	0.372067	0.383899	0.384082	0.383681	0.367464	0.349751	0.327902	0.313081	0.332188	0.346535	0.346726	0.354311	0.372422	0.381223	0.38035	0.387081	0.399503	0.398748	0.391579	0.387885	0.385295	0.402445	0.414219	0.417634	0.410181	0.382652	0.360299	0.344779	0.326543	0.305485	0.282705	0.258631	0.231452	0.201762	0.175024	0.151089	0.140654	0.131844	0.105173	0.0794882	0.063738	0.0791741	0.129497	0.174474	0.216604
0.193677	0.172026	0.144493	0.118986	0.102794	0.0889157	0.0816641	0.0791469	0.0858694	0.0987106	0.120799	0.14005	0.156188	0.171937	0.187376	0.215545	0.25158	0.287775	0.324086	0.357566	0.389571	0.405817	0.415885	0.431426	0.448344	0.43894	0.422042	0.387431	0.349902	0.320966	0.292589	0.284801	0.279393	0.265831	0.252144	0.244145	0.238633	0.255961	0.278676	0.32993	0.380395	0.410909	0.440448	0.461011	0.480386	0.480484	0.478604	0.464417	0.450292	0.436391
0.406075	0.363137	0.335128	0.347869	0.364861	0.384603	0.396606	0.40089	0.382789	0.369254	0.365096	0.374484	0.403577	0.437568	0.475294	0.489635	0.501589	0.489438	0.473872	0.451301	0.419071	0.371492	0.333812	0.3083	0.288143	0.275183	0.285539	0.335972	0.364039	0.38239	0.390477	0.395628	0.342	0.278661	0.211459	0.155669	0.128217	0.114135	0.123987	0.141394	0.162203	0.185635	0.209605	0.23851	0.267011	0.293353	0.312885	0.310686	0.307554	0.301077
0.360342	0.394305	0.427008	0.451796	0.457579	0.458206	0.449425	0.42706	0.385501	0.346263	0.310897	0.284086	0.274412	0.273356	0.285577	0.339643	0.436502	0.511034	0.56762	0.593376	0.592271	0.548681	0.478495	0.400116	0.320776	0.287928	0.257302	0.235551	0.214848	0.224648	0.236836	0.264561	0.291663	0.302659	0.313749	0.336141	0.355791	0.352639	0.349466	0.346002	0.342906	0.341912	0.348217	0.379044	0.407777	0.428572	0.452899	0.485936	0.500895	0.484889
0.400428	0.394768	0.375598	0.353521	0.328719	0.321104	0.341938	0.374593	0.430626	0.486606	0.542512	0.59758	0.651731	0.669118	0.657267	0.62592	0.576344	0.523678	0.467621	0.418327	0.374874	0.3305	0.285554	0.230908	0.172054	0.146159	0.129712	0.150219	0.176883	0.195734	0.213725	0.212986	0.212247	0.200302	0.187999	0.173235	0.156827	0.130122	0.106408	0.0948171	0.080538	0.0585104	0.0418444	0.0444118	0.0451716	0.0416612	0.054671	0.0948882	0.122828	0.136192
0.554762	0.518223	0.455642	0.393366	0.334381	0.282016	0.268688	0.261127	0.260778	0.250026	0.23674	0.201929	0.164311	0.119757	0.0754128	0.0558382	0.0362635	0.0219384	0.00844234	0.0131146	0.0188492	0.0216083	0.0243675	0.021901	0.0205461	0.0225037	0.0312644	0.0541291	0.0821615	0.113565	0.125793	0.134097	0.13131	0.121633	0.105711	0.0890032	0.0717387	0.0492151	0.0257253	0.011571	-0.00112872	-0.00321329	-0.00443964	0.00851067	0.0229595	0.0475853	0.0707773	0.0803361	0.0891688	0.0959917
0.419665	0.433756	0.457436	0.45527	0.448679	0.444861	0.426971	0.399352	0.368494	0.335904	0.318829	0.307871	0.302528	0.299479	0.303985	0.288578	0.254238	0.238389	0.224752	0.211124	0.202366	0.225308	0.237976	0.225761	0.216044	0.208189	0.205556	0.206011	0.227333	0.247042	0.264257	0.255456	0.23715	0.211696	0.185392	0.177374	0.171342	0.19745	0.224821	0.258217	0.287664	0.309847	0.322438	0.33078	0.330726	0.328319	0.318776	0.307169	0.285657	0.264164
0.339036	0.392214	0.441423	0.475387	0.477791	0.4541	0.465838	0.484066	0.490864	0.495943	0.494458	0.459962	0.39598	0.35373	0.313909	0.274885	0.25262	0.24541	0.237967	0.241912	0.284607	0.332479	0.392006	0.466006	0.562932	0.624445	0.645637	0.655673	0.656521	0.615004	0.548454	0.511633	0.478547	0.451485	0.425507	0.418983	0.41714	0.421141	0.419439	0.392717	0.358846	0.305468	0.272488	0.251601	0.259365	0.271408	0.28664	0.296446	0.28985	0.277536
0.492125	0.411928	0.366859	0.326939	0.339349	0.3532	0.395015	0.438316	0.491553	0.536442	0.549702	0.564325	0.58228	0.592947	0.591172	0.593099	0.599566	0.582589	0.544856	0.523528	0.512689	0.489417	0.460558	0.444414	0.432509	0.399872	0.36239	0.334464	0.307981	0.306228	0.305383	0.292676	0.279117	0.258669	0.238549	0.221773	0.206831	0.200799	0.192801	0.168931	0.148252	0.141262	0.136462	0.137586	0.143455	0.16519	0.181752	0.176289	0.170522	0.163929
0.16359	0.198762	0.259085	0.311082	0.343946	0.356071	0.331739	0.305661	0.275923	0.256939	0.265499	0.282885	0.315827	0.33849	0.348187	0.35112	0.344016	0.324248	0.290859	0.268627	0.255088	0.241745	0.228511	0.21733	0.207395	0.205635	0.209761	0.219758	0.232741	0.265116	0.304198	0.322344	0.335988	0.352095	0.368969	0.38236	0.395097	0.395713	0.395019	0.384901	0.373285	0.362213	0.351273	0.364246	0.381035	0.42503	0.471961	0.51479	0.555567	0.567547
NaN	NaN	NaN	NaN	NaN	NaN	NaN	NaN	NaN	NaN	NaN	NaN	NaN	NaN	NaN	NaN	0.367634	0.320475	0.276779	0.234751	0.213063	0.197946	0.205079	0.215961	0.225873	0.235696	0.245164	0.25459	0.2847	0.316223	0.35986	0.402439	0.435164	0.463304	0.483376	0.510384	0.546105	0.59661	0.661722	0.740954	0.830304	0.860387	0.881062	0.869062	0.855088	0.794978	0.729866	0.689769	0.650198	0.611221
0.45219	0.507215	0.554329	0.578621	0.592083	0.563325	0.52119	0.478731	0.436209	0.380359	0.323334	0.310951	0.298577	0.290585	0.286741	0.355908	0.423735	0.482592	0.542834	0.617088	0.682531	0.705018	0.722579	0.707121	0.685957	0.640466	0.582766	0.492125	0.411928	0.366859	0.326939	0.339349	0.3532	0.395015	0.438316	0.491553	0.536442	0.549702	0.564325	0.58228	0.592947	0.591172	0.593099	0.599566	0.582589	0.544856	0.523528	0.512689	0.489417	0.460558
0.342024	0.3079	0.270555	0.230053	0.201807	0.182219	0.194823	0.223584	0.248154	0.271292	0.294166	0.316977	0.322242	0.324792	0.329472	0.334328	0.318373	0.303094	0.302205	0.305235	0.341466	0.377697	0.412006	0.429755	0.447503	0.465251	0.483	0.500748	0.518496	0.543131	0.594668	0.637796	0.65991	0.685097	0.715619	0.738622	0.750615	0.758852	0.763107	0.78005	0.807553	0.862537	0.933898	0.946806	0.945572	0.913895	0.878317	0.815695	0.74867	0.73384
0.492236	0.4776	0.480125	0.485495	0.50009	0.511742	0.517017	0.519524	0.516562	0.50094	0.480286	0.461352	0.441611	0.396329	0.353644	0.316576	0.2749	0.225534	0.206171	0.199998	0.202664	0.210897	0.24	0.268599	0.295869	0.319097	0.339343	0.35025	0.360279	0.372067	0.383899	0.384082	0.383681	0.367464	0.349751	0.327902	0.313081	0.332188	0.346535	0.346726	0.354311	0.372422	0.381223	0.38035	0.387081	0.399503	0.398748	0.391579	0.387885	0.385295
0.461773	0.452501	0.434186	0.407321	0.378166	0.347911	0.301462	0.2497	0.213246	0.1806	0.155637	0.137152	0.153981	0.174023	0.205824	0.249554	0.302072	0.341834	0.380682	0.42296	0.467526	0.519558	0.545345	0.553238	0.537067	0.513415	0.492236	0.4776	0.480125	0.485495	0.50009	0.511742	0.517017	0.519524	0.516562	0.50094	0.480286	0.461352	0.441611	0.396329	0.353644	0.316576	0.2749	0.225534	0.206171	0.199998	0.202664	0.210897	0.24	0.268599
0.869062	0.855088	0.794978	0.729866	0.689769	0.650198	0.611221	0.572982	0.551633	0.530391	0.509904	0.488812	0.462402	0.433077	0.39074	0.363549	0.37863	0.403781	0.448171	0.485025	0.511565	0.51	0.482741	0.435917	0.375111	0.335146	0.30586	0.291308	0.281851	0.291724	0.305869	0.332573	0.360615	0.378231	0.395673	0.409048	0.422383	0.444094	0.468113	0.518244	0.565677	0.596996	0.621631	0.62009	0.609837	0.555179	0.504569	0.469847	0.432281	0.3875
0.454835	0.496309	0.509014	0.521458	0.537785	0.547063	0.513959	0.484683	0.488962	0.48754	0.46053	0.430753	0.38664	0.345056	0.311384	0.289559	0.295038	0.305135	0.328249	0.353487	0.382898	0.428042	0.482732	0.52983	0.571925	0.589538	0.588071	0.554224	0.502338	0.455772	0.411265	0.380248	0.352582	0.335759	0.32233	0.312645	0.303661	0.30213	0.301228	0.301101	0.300386	0.290657	0.280989	0.271759	0.265003	0.279931	0.296198	0.319092	0.345433	0.375109
0.451838	0.390201	0.338508	0.287751	0.247737	0.208986	0.204624	0.203079	0.23469	0.272029	0.346389	0.421848	0.50187	0.579686	0.651014	0.69587	0.687845	0.660321	0.602909	0.550888	0.504883	0.488828	0.496883	0.498358	0.496034	0.489791	0.481985	0.482272	0.484658	0.478586	0.471299	0.44724	0.422003	0.378511	0.336853	0.328784	0.322021	0.323605	0.319633	0.29513	0.281499	0.319406	0.358756	0.402318	0.446785	0.494577	0.519726	0.49133	0.456857	0.412308
0.890113	0.923173	0.895127	0.86373	0.823848	0.785182	0.75684	0.728498	0.70016	0.657937	0.595451	0.549663	0.520073	0.500164	0.482002	0.490356	0.49602	0.485305	0.469881	0.436438	0.393344	0.333702	0.270657	0.203073	0.142445	0.0867032	0.0410645	0.000460671	-0.0215935	-0.0417456	-0.0475629	-0.0531943	-0.0501874	-0.0464139	-0.0332267	-0.0160328	0.0285056	0.0784871	0.149169	0.229931	0.335589	0.424461	0.503371	0.541149	0.56022	0.578544	0.596615	0.574382	0.543765	0.553679
0.157567	0.163002	0.170295	0.177995	0.188523	0.203283	0.224396	0.261707	0.303618	0.39425	0.473492	0.491789	0.491082	0.468102	0.409255	0.339131	0.29186	0.247614	0.214887	0.18856	0.182614	0.19752	0.230161	0.263039	0.296009	0.321023	0.339822	0.329779	0.322837	0.319242	0.308351	0.294905	0.265819	0.228734	0.192834	0.160048	0.135232	0.135108	0.152775	0.176233	0.193354	0.196567	0.205235	0.225468	0.269441	0.337099	0.419358	0.509831	0.578825	0.631776
0.40996	0.419086	0.430571	0.450554	0.476939	0.508348	0.542491	0.562724	0.57777	0.609705	0.645602	0.676076	0.70588	0.756995	0.811889	0.826773	0.838546	0.824205	0.809863	0.722276	0.633323	0.546901	0.460725	0.387395	0.317132	0.282435	0.250339	0.231994	0.226137	0.260217	0.299068	0.348074	0.413276	0.502852	0.576292	0.633533	0.693645	0.755845	0.785937	0.788525	0.78655	0.779994	0.768867	0.754418	0.700629	0.627935	0.537785	0.437739	0.376846	0.332734
Time relative to onset of a reversal (s)
-20	-19.5	-19	-18.5	-18	-17.5	-17	-16.5	-16	-15.5	-15	-14.5	-14	-13.5	-13	-12.5	-12	-11.5	-11	-10.5	-10	-9.5	-9	-8.5	-8	-7.5	-7	-6.5	-6	-5.5	-5	-4.5	-4	-3.5	-3	-2.5	-2	-1.5	-1	-0.5	0	0.5	1	1.5	2	2.5	3	3.5	4	4.5
Calcium activity in AIY (dR/R0)
0.143619	0.212073	0.291674	0.388764	0.487367	0.574551	0.661734	0.741507	0.81779	0.875044	0.926268	0.954862	0.978502	0.951005	0.916548	0.862702	0.80761	0.773391	0.738217	0.681157	0.628495	0.602942	0.567601	0.497474	0.430243	0.370435	0.307631	0.239516	0.180743	0.133832	0.0991013	0.0747305	0.0557999	0.0450024	0.0463315	0.0618506	0.0856146	0.120718	0.16151	0.208959	0.25556	0.301378	0.331871	0.351277	0.359756	0.361548	0.348876	0.325721	0.311526	0.312536
0.146988	0.146287	0.144734	0.169127	0.194344	0.22057	0.246875	0.268956	0.289899	0.27566	0.255145	0.224303	0.192752	0.16439	0.137753	0.125217	0.117206	0.128591	0.146622	0.197525	0.25009	0.307654	0.364197	0.418458	0.471459	0.521351	0.561859	0.584613	0.602024	0.611683	0.59951	0.562581	0.533675	0.511919	0.49415	0.479402	0.463917	0.448068	0.427229	0.404897	0.336453	0.259796	0.209918	0.16325	0.155859	0.151484	0.171811	0.180197	0.12961	0.087448
0.73384	0.722452	0.715212	0.709171	0.713856	0.716261	0.708309	0.702731	0.703943	0.701758	0.692353	0.685991	0.684188	0.687127	0.695185	0.683899	0.657465	0.621482	0.580571	0.517511	0.446701	0.408817	0.378121	0.373034	0.370799	0.390675	0.414175	0.437659	0.459934	0.463125	0.466149	0.468145	0.466303	0.450883	0.432332	0.399556	0.365991	0.331505	0.312949	0.307919	0.319359	0.340842	0.355621	0.367541	0.348916	0.320667	0.280315	0.237313	0.205094	0.174341
0.363405	0.384224	0.404354	0.423992	0.442575	0.446831	0.42936	0.410124	0.387721	0.359981	0.321581	0.29765	0.295975	0.30805	0.336636	0.376884	0.427294	0.453013	0.463251	0.442018	0.406962	0.359546	0.3085	0.257119	0.205649	0.177984	0.153737	0.155098	0.158813	0.194393	0.229972	0.290213	0.350568	0.380971	0.409309	0.396162	0.381132	0.348128	0.317117	0.295545	0.282181	0.295571	0.304561	0.29527	0.285882	0.275944	0.26331	0.24185	0.244196	0.298454
0.602666	0.627037	0.614193	0.600285	0.585448	0.568245	0.548688	0.530709	0.513862	0.493344	0.470955	0.447065	0.422655	0.405717	0.391946	0.387221	0.385035	0.378426	0.371114	0.393446	0.417615	0.444455	0.469117	0.461148	0.447139	0.396573	0.344556	0.279704	0.221872	0.200301	0.180872	0.180194	0.181667	0.192928	0.206537	0.22676	0.258573	0.326726	0.386999	0.430651	0.475866	0.527247	0.559598	0.543686	0.521055	0.477383	0.429954	0.374608	0.325665	0.286246
0.383899	0.384082	0.383681	0.367464	0.349751	0.327902	0.313081	0.332188	0.346535	0.346726	0.354311	0.372422	0.381223	0.38035	0.387081	0.399503	0.398748	0.391579	0.387885	0.385295	0.402445	0.414219	0.417634	0.410181	0.382652	0.360299	0.344779	0.326543	0.305485	0.282705	0.258631	0.231452	0.201762	0.175024	0.151089	0.140654	0.131844	0.105173	0.0794882	0.063738	0.0791741	0.129497	0.174474	0.216604	0.260624	0.297791	0.29705	0.299694	0.306759	0.318329
0.279117	0.258669	0.238549	0.221773	0.206831	0.200799	0.192801	0.168931	0.148252	0.141262	0.136462	0.137586	0.143455	0.16519	0.181752	0.176289	0.170522	0.163929	0.156861	0.148836	0.142439	0.139796	0.141916	0.151712	0.164111	0.179532	0.198492	0.220447	0.25528	0.297901	0.331013	0.360088	0.378494	0.393943	0.380294	0.362002	0.337695	0.313076	0.31119	0.310173	0.322365	0.341438	0.409758	0.474629	0.525959	0.581627	0.649466	0.7027	0.704985	0.704277
0.494577	0.519726	0.49133	0.456857	0.412308	0.368104	0.324309	0.311611	0.325789	0.346333	0.370855	0.389087	0.400428	0.394768	0.375598	0.353521	0.328719	0.321104	0.341938	0.374593	0.430626	0.486606	0.542512	0.59758	0.651731	0.669118	0.657267	0.62592	0.576344	0.523678	0.467621	0.418327	0.374874	0.3305	0.285554	0.230908	0.172054	0.146159	0.129712	0.150219	0.176883	0.195734	0.213725	0.212986	0.212247	0.200302	0.187999	0.173235	0.156827	0.130122
0.834366	0.877625	0.904272	0.916469	0.895895	0.854753	0.790243	0.71539	0.634355	0.551312	0.482159	0.41615	0.362914	0.311512	0.293225	0.275663	0.234648	0.195487	0.170825	0.144345	0.110246	0.0829692	0.0738246	0.0694975	0.0794093	0.0883403	0.0953033	0.104387	0.118604	0.13011	0.136621	0.144456	0.154024	0.164405	0.175559	0.192097	0.212651	0.219364	0.218729	0.224387	0.232343	0.227316	0.219299	0.227916	0.245326	0.254374	0.258567	0.264881	0.272048	0.276247
0.252684	0.235107	0.22583	0.2216	0.213943	0.203607	0.205881	0.215833	0.215574	0.214926	0.198441	0.180422	0.138279	0.107073	0.0950911	0.0893324	0.0966418	0.105631	0.116453	0.138014	0.163228	0.218507	0.280913	0.375302	0.452983	0.507853	0.550617	0.590377	0.587941	0.584182	0.581141	0.558497	0.501366	0.442394	0.372347	0.31131	0.262584	0.238932	0.234805	0.227774	0.219946	0.216793	0.212338	0.203351	0.211496	0.234107	0.269682	0.30286	0.318758	0.329584
0.229931	0.335589	0.424461	0.503371	0.541149	0.56022	0.578544	0.596615	0.574382	0.543765	0.553679	0.567887	0.569662	0.567271	0.575919	0.586866	0.554762	0.518223	0.455642	0.393366	0.334381	0.282016	0.268688	0.261127	0.260778	0.250026	0.23674	0.201929	0.164311	0.119757	0.0754128	0.0558382	0.0362635	0.0219384	0.00844234	0.0131146	0.0188492	0.0216083	0.0243675	0.021901	0.0205461	0.0225037	0.0312644	0.0541291	0.0821615	0.113565	0.125793	0.134097	0.13131	0.121633
0.280011	0.258801	0.231658	0.228295	0.245984	0.285103	0.337933	0.401572	0.470066	0.505369	0.529643	0.509354	0.479976	0.404426	0.316587	0.23282	0.149772	0.0796074	0.0114921	0.0412216	0.0709511	0.136217	0.201423	0.261464	0.315351	0.334639	0.346632	0.334173	0.329109	0.340476	0.35206	0.364173	0.377296	0.392133	0.403291	0.40996	0.419086	0.430571	0.450554	0.476939	0.508348	0.542491	0.562724	0.57777	0.609705	0.645602	0.676076	0.70588	0.756995	0.811889
0.246019	0.245599	0.237607	0.218875	0.199301	0.179214	0.162515	0.153365	0.146373	0.140878	0.135006	0.131267	0.150565	0.176683	0.22344	0.261454	0.29386	0.312761	0.32145	0.313273	0.30258	0.292872	0.283271	0.273785	0.272621	0.275032	0.290619	0.312691	0.34536	0.362818	0.374349	0.354819	0.330471	0.296307	0.26137	0.220696	0.187353	0.163349	0.157567	0.163002	0.170295	0.177995	0.188523	0.203283	0.224396	0.261707	0.303618	0.39425	0.473492	0.491789
0.341446	0.30688	0.301915	0.334809	0.38534	0.45219	0.507215	0.554329	0.578621	0.592083	0.563325	0.52119	0.478731	0.436209	0.380359	0.323334	0.310951	0.298577	0.290585	0.286741	0.355908	0.423735	0.482592	0.542834	0.617088	0.682531	0.705018	0.722579	0.707121	0.685957	0.640466	0.582766	0.492125	0.411928	0.366859	0.326939	0.339349	0.3532	0.395015	0.438316	0.491553	0.536442	0.549702	0.564325	0.58228	0.592947	0.591172	0.593099	0.599566	0.582589
0.545536	0.595399	0.632468	0.636213	0.639732	0.642845	0.638026	0.622129	0.622458	0.629814	0.625849	0.618653	0.610565	0.602593	0.604972	0.607351	0.611552	0.615796	0.611535	0.606509	0.583515	0.560595	0.55041	0.542138	0.548201	0.554411	0.56131	0.570165	0.591492	0.603743	0.583471	0.557778	0.509957	0.445812	0.363739	0.337713	0.343459	0.361212	0.38703	0.401344	0.410188	0.399606	0.384667	0.366184	0.347297	0.37285	0.399478	0.468695	0.539889	0.614266
-0.00321329	-0.00443964	0.00851067	0.0229595	0.0475853	0.0707773	0.0803361	0.0891688	0.0959917	0.101321	0.105674	0.137938	0.178795	0.2119	0.243944	0.252274	0.257358	0.234824	0.21529	0.200174	0.191828	0.191247	0.193278	0.195787	0.209054	0.223455	0.281667	0.339036	0.392214	0.441423	0.475387	0.477791	0.4541	0.465838	0.484066	0.490864	0.495943	0.494458	0.459962	0.39598	0.35373	0.313909	0.274885	0.25262	0.24541	0.237967	0.241912	0.284607	0.332479	0.392006
0.606629	0.590192	0.571055	0.542101	0.518256	0.506582	0.492291	0.474857	0.461773	0.452501	0.434186	0.407321	0.378166	0.347911	0.301462	0.2497	0.213246	0.1806	0.155637	0.137152	0.153981	0.174023	0.205824	0.249554	0.302072	0.341834	0.380682	0.42296	0.467526	0.519558	0.545345	0.553238	0.537067	0.513415	0.492236	0.4776	0.480125	0.485495	0.50009	0.511742	0.517017	0.519524	0.516562	0.50094	0.480286	0.461352	0.441611	0.396329	0.353644	0.316576
0.237762	0.204191	0.168247	0.131643	0.108717	0.0879914	0.102262	0.120207	0.172159	0.224367	0.278398	0.32884	0.348024	0.366459	0.373597	0.381502	0.393987	0.40406	0.405764	0.406498	0.404778	0.39558	0.372096	0.354923	0.347885	0.330959	0.300589	0.266358	0.228297	0.186369	0.14166	0.108817	0.0820161	0.0793886	0.0860225	0.111181	0.144114	0.173766	0.202514	0.203466	0.200019	0.165051	0.127491	0.0891793	0.0506838	0.0254367	0.00194156	-0.00551024	-0.0119396	-0.000798811
0.162088	0.171722	0.17434	0.173638	0.16199	0.145867	0.125053	0.107423	0.102546	0.107791	0.122334	0.147406	0.177963	0.233095	0.288698	0.345009	0.387398	0.414778	0.423257	0.425103	0.414299	0.399081	0.402331	0.401784	0.384598	0.370601	0.365445	0.375233	0.395552	0.424853	0.45346	0.475149	0.497927	0.522049	0.578102	0.654863	0.725804	0.785901	0.814612	0.798813	0.751725	0.714671	0.683572	0.649349	0.627061	0.63863	0.654912	0.682974	0.710995	0.738964
0.305869	0.332573	0.360615	0.378231	0.395673	0.409048	0.422383	0.444094	0.468113	0.518244	0.565677	0.596996	0.621631	0.62009	0.609837	0.555179	0.504569	0.469847	0.432281	0.3875	0.353637	0.340576	0.334347	0.343774	0.363027	0.398045	0.42112	0.430898	0.430178	0.420998	0.395485	0.360559	0.33273	0.30774	0.269972	0.228482	0.204587	0.184194	0.164266	0.144472	0.130528	0.117926	0.103237	0.0882477	0.0835235	0.0797749	0.114623	0.155045	0.189467	0.223602
0.544624	0.584358	0.604378	0.614829	0.572604	0.513118	0.451838	0.390201	0.338508	0.287751	0.247737	0.208986	0.204624	0.203079	0.23469	0.272029	0.346389	0.421848	0.50187	0.579686	0.651014	0.69587	0.687845	0.660321	0.602909	0.550888	0.504883	0.488828	0.496883	0.498358	0.496034	0.489791	0.481985	0.482272	0.484658	0.478586	0.471299	0.44724	0.422003	0.378511	0.336853	0.328784	0.322021	0.323605	0.319633	0.29513	0.281499	0.319406	0.358756	0.402318
0.566493	0.567438	0.525157	0.516785	0.523849	0.612468	0.710241	0.825008	0.890113	0.923173	0.895127	0.86373	0.823848	0.785182	0.75684	0.728498	0.70016	0.657937	0.595451	0.549663	0.520073	0.500164	0.482002	0.490356	0.49602	0.485305	0.469881	0.436438	0.393344	0.333702	0.270657	0.203073	0.142445	0.0867032	0.0410645	0.000460671	-0.0215935	-0.0417456	-0.0475629	-0.0531943	-0.0501874	-0.0464139	-0.0332267	-0.0160328	0.0285056	0.0784871	0.149169	0.229931	0.335589	0.424461
0.390477	0.395628	0.342	0.278661	0.211459	0.155669	0.128217	0.114135	0.123987	0.141394	0.162203	0.185635	0.209605	0.23851	0.267011	0.293353	0.312885	0.310686	0.307554	0.301077	0.289521	0.265999	0.253011	0.258944	0.269769	0.282512	0.347193	0.424066	0.503472	0.580398	0.654619	0.688302	0.699023	0.688317	0.676219	0.66921	0.671507	0.693778	0.707752	0.715135	0.664466	0.617849	0.58076	0.57114	0.594132	0.643701	0.705903	0.769795	0.832686	0.817053
0.393366	0.334381	0.282016	0.268688	0.261127	0.260778	0.250026	0.23674	0.201929	0.164311	0.119757	0.0754128	0.0558382	0.0362635	0.0219384	0.00844234	0.0131146	0.0188492	0.0216083	0.0243675	0.021901	0.0205461	0.0225037	0.0312644	0.0541291	0.0821615	0.113565	0.125793	0.134097	0.13131	0.121633	0.105711	0.0890032	0.0717387	0.0492151	0.0257253	0.011571	-0.00112872	-0.00321329	-0.00443964	0.00851067	0.0229595	0.0475853	0.0707773	0.0803361	0.0891688	0.0959917	0.101321	0.105674	0.137938
0.460725	0.387395	0.317132	0.282435	0.250339	0.231994	0.226137	0.260217	0.299068	0.348074	0.413276	0.502852	0.576292	0.633533	0.693645	0.755845	0.785937	0.788525	0.78655	0.779994	0.768867	0.754418	0.700629	0.627935	0.537785	0.437739	0.376846	0.332734	0.337638	0.356383	0.401556	0.451096	0.443007	0.423744	0.40064	0.372202	0.341446	0.30688	0.301915	0.334809	0.38534	0.45219	0.507215	0.554329	0.578621	0.592083	0.563325	0.52119	0.478731	0.436209
0.196264	0.186067	0.182017	0.203843	0.241436	0.276868	0.310769	0.361302	0.420185	0.471328	0.519835	0.568147	0.616418	0.635609	0.647811	0.509612	0.351946	0.293891	0.240012	0.200336	0.1738	0.258562	0.32525	0.312843	0.30018	0.286734	0.273878	0.262255	0.249781	0.235948	0.238468	0.259758	0.279825	0.298953	0.320041	0.342204	0.344629	0.339598	0.344867	0.354842	0.362193	0.368555	0.387278	0.409375	0.413221	0.413746	0.40667	0.397752	0.367651	0.331051
NaN	NaN	NaN	NaN	NaN	NaN	NaN	NaN	NaN	NaN	NaN	NaN	NaN	NaN	NaN	NaN	NaN	NaN	NaN	NaN	NaN	NaN	NaN	NaN	NaN	NaN	NaN	NaN	NaN	NaN	NaN	NaN	NaN	NaN	NaN	NaN	NaN	NaN	NaN	NaN	NaN	NaN	NaN	NaN	NaN	NaN	NaN	NaN	NaN	NaN
0.340476	0.35206	0.364173	0.377296	0.392133	0.403291	0.40996	0.419086	0.430571	0.450554	0.476939	0.508348	0.542491	0.562724	0.57777	0.609705	0.645602	0.676076	0.70588	0.756995	0.811889	0.826773	0.838546	0.824205	0.809863	0.722276	0.633323	0.546901	0.460725	0.387395	0.317132	0.282435	0.250339	0.231994	0.226137	0.260217	0.299068	0.348074	0.413276	0.502852	0.576292	0.633533	0.693645	0.755845	0.785937	0.788525	0.78655	0.779994	0.768867	0.754418
0.192335	0.187455	0.222901	0.288374	0.356806	0.426803	0.482067	0.531997	0.540428	0.538158	0.578437	0.624861	0.647558	0.668016	0.717962	0.761802	0.726308	0.690924	0.656139	0.613874	0.54729	0.486756	0.451193	0.421439	0.406982	0.401317	0.411627	0.421321	0.430214	0.435384	0.43675	0.425513	0.404106	0.384361	0.365662	0.356186	0.353542	0.353798	0.355725	0.351857	0.345447	0.347943	0.353018	0.351578	0.348026	0.338813	0.328487	0.30409	0.278205	0.269319
0.29186	0.247614	0.214887	0.18856	0.182614	0.19752	0.230161	0.263039	0.296009	0.321023	0.339822	0.329779	0.322837	0.319242	0.308351	0.294905	0.265819	0.228734	0.192834	0.160048	0.135232	0.135108	0.152775	0.176233	0.193354	0.196567	0.205235	0.225468	0.269441	0.337099	0.419358	0.509831	0.578825	0.631776	0.619452	0.606629	0.590192	0.571055	0.542101	0.518256	0.506582	0.492291	0.474857	0.461773	0.452501	0.434186	0.407321	0.378166	0.347911	0.301462
0.312691	0.34536	0.362818	0.374349	0.354819	0.330471	0.296307	0.26137	0.220696	0.187353	0.163349	0.157567	0.163002	0.170295	0.177995	0.188523	0.203283	0.224396	0.261707	0.303618	0.39425	0.473492	0.491789	0.491082	0.468102	0.409255	0.339131	0.29186	0.247614	0.214887	0.18856	0.182614	0.19752	0.230161	0.263039	0.296009	0.321023	0.339822	0.329779	0.322837	0.319242	0.308351	0.294905	0.265819	0.228734	0.192834	0.160048	0.135232	0.135108	0.152775
NaN	NaN	NaN	NaN	NaN	NaN	NaN	NaN	NaN	NaN	NaN	NaN	NaN	NaN	NaN	NaN	NaN	NaN	NaN	NaN	NaN	NaN	NaN	NaN	NaN	NaN	NaN	NaN	NaN	NaN	NaN	NaN	NaN	NaN	NaN	NaN	NaN	NaN	NaN	NaN	NaN	NaN	NaN	0.367634	0.320475	0.276779	0.234751	0.213063	0.197946	0.205079
0.394768	0.375598	0.353521	0.328719	0.321104	0.341938	0.374593	0.430626	0.486606	0.542512	0.59758	0.651731	0.669118	0.657267	0.62592	0.576344	0.523678	0.467621	0.418327	0.374874	0.3305	0.285554	0.230908	0.172054	0.146159	0.129712	0.150219	0.176883	0.195734	0.213725	0.212986	0.212247	0.200302	0.187999	0.173235	0.156827	0.130122	0.106408	0.0948171	0.080538	0.0585104	0.0418444	0.0444118	0.0451716	0.0416612	0.054671	0.0948882	0.122828	0.136192	0.152041
0.0953033	0.104387	0.118604	0.13011	0.136621	0.144456	0.154024	0.164405	0.175559	0.192097	0.212651	0.219364	0.218729	0.224387	0.232343	0.227316	0.219299	0.227916	0.245326	0.254374	0.258567	0.264881	0.272048	0.276247	0.27958	0.274119	0.267154	0.255832	0.243507	0.225788	0.207425	0.211441	0.216531	0.231291	0.246976	0.293707	0.34497	0.36311	0.378894	0.399766	0.417195	0.390857	0.364147	0.32661	0.286851	0.225587	0.170019	0.14187	0.125519	0.173883
0.507853	0.550617	0.590377	0.587941	0.584182	0.581141	0.558497	0.501366	0.442394	0.372347	0.31131	0.262584	0.238932	0.234805	0.227774	0.219946	0.216793	0.212338	0.203351	0.211496	0.234107	0.269682	0.30286	0.318758	0.329584	0.324558	0.319184	0.312933	0.311643	0.313362	0.30717	0.296155	0.274809	0.269173	0.270829	0.283177	0.297558	0.310715	0.313614	0.304579	0.294281	0.283396	0.274899	0.269882	0.276881	0.286162	0.29944	0.311954	0.324143	0.33394
0.0740757	0.0661651	0.0855393	0.105258	0.12963	0.151222	0.153911	0.153094	0.137231	0.12623	0.129927	0.141435	0.170513	0.19916	0.227071	0.251403	0.271338	0.276568	0.268674	0.258942	0.247927	0.244951	0.246071	0.261429	0.272598	0.272386	0.265274	0.237399	0.214652	0.199315	0.189325	0.184887	0.191074	0.205257	0.201998	0.19565	0.206037	0.217259	0.224054	0.233524	0.246019	0.245599	0.237607	0.218875	0.199301	0.179214	0.162515	0.153365	0.146373	0.140878
0.319915	0.370537	0.432199	0.506644	0.578282	0.647564	0.694772	0.720221	0.692659	0.624183	0.533187	0.428633	0.332916	0.240925	0.18781	0.145457	0.2028	0.275943	0.356394	0.436381	0.478992	0.521354	0.504498	0.487642	0.461943	0.436321	0.420312	0.402615	0.372989	0.347113	0.362669	0.380279	0.409579	0.436023	0.451684	0.454653	0.426431	0.398348	0.370682	0.348863	0.338969	0.326957	0.311897	0.29636	0.280011	0.258801	0.231658	0.228295	0.245984	0.285103
[truncated: 131 more columns]

## Sheet: Fig 4E-AVAChrimson
AVA::Chrimson no ATR control
Time relative to stim onset (s)
-10	-9.5	-9	-8.5	-8	-7.5	-7	-6.5	-6	-5.5	-5	-4.5	-4	-3.5	-3	-2.5	-2	-1.5	-1	-0.5	0	0.5	1	1.5	2	2.5	3	3.5	4	4.5	5	5.5	6	6.5	7	7.5	8	8.5	9	9.5	10	10.5	11	11.5	12	12.5	13	13.5	14	14.5
Calcium activity in AIY (dR/R0)
0.0140547	0.0121634	0.0168973	0.0149381	0.015006	0.0128202	0.0119482	0.00860722	0.00807493	0.00921878	0.0127183	0.0116424	0.0136583	0.0140207	0.0165462	0.017407	0.015878	0.0189925	0.0194002	0.0204195	0.030918	0.0734784	0.151657	0.233063	0.302204	0.352692	0.396668	0.436748	0.480294	0.546151	0.585302	0.608292	0.615541	0.642234	0.692938	0.753924	0.80738	0.846882	0.871605	0.888163	0.869034	0.850552	0.827187	0.815341	0.798138	0.76483	0.695055	0.585642
0.0897213	0.0770176	0.0753822	0.055414	0.041373	0.0236095	0.0338014	0.043659	0.0431349	0.0194441	0.00708374	0	0.00477972	0.0175106	0.0258502	0.0398912	0.047499	0.0396202	0.0388702	0.0238715	0.0242871	0.0126405	0.0266815	0.0496494	0.074298	0.0459178	0.0471014	0.0485742	0.080686	0.0815263	0.0798728	0.0800354	0.08018	0.0831797	0.0832972	0.123125	0.215051	0.351269	0.451986	0.50824	0.532907	0.51695	0.4512	0.347962	0.260056	0.202411	0.166088	0.146626
0.0423792	0.037566	0.021133	0.0206573	0.0179166	0.0146323	0.0135564	0.0157421	0.0197966	0.0573399	0.147954	0.253154	0.350268	0.439059	0.516116	0.608247	0.651725	0.652212	0.652065	0.661204	0.664058	0.609266	0.602788	0.638497	0.651657	0.587862	0.556955	0.578586	0.643956	0.692066	0.701624	0.688362	0.646798	0.633401	0.655224	0.718397	0.739756	0.701477	0.617115	0.597092	0.607228	0.611124	0.586525	0.520589	0.463329	0.393304	0.343451	0.304333
0.140979	0.128003	0.116072	0.10753	0.0991858	0.0869156	0.06128	0.0406325	0.0275574	0.0207515	0.0222573	0.02131	0.0209487	0.0192623	0.0275848	0.0401726	0.0361975	0.0248197	0.0210801	0.0186326	0.0283896	0.0648499	0.129842	0.199511	0.240548	0.254921	0.242032	0.22438	0.205829	0.193805	0.183714	0.172791	0.164304	0.150369	0.140716	0.131359	0.121093	0.111828	0.101288	0.118317	0.195399	0.282456	0.363218	0.363913	0.366711	0.392839	0.445769	0.499614
0.0790144	0.076096	0.0785898	0.0757346	0.0780747	0.0771351	0.0780567	0.0777043	0.0822672	0.0812642	0.0832611	0.0796288	0.0834779	0.0828545	0.0842911	0.0812281	0.0800173	0.0785988	0.0802071	0.0873993	0.163179	0.283042	0.412836	0.497172	0.53794	0.562904	0.562263	0.560817	0.554095	0.57522	0.581011	0.609283	0.612644	0.643608	0.64228	0.661164	0.657125	0.663459	0.647792	0.61521	0.601323	0.616818	0.673768	0.723716	0.777386	0.827054	0.844953	0.851133
0.0824027	0.083749	0.0836225	0.0835954	0.0823214	0.0824208	0.0820142	0.0797644	0.0806137	0.0812191	0.0783097	0.0793849	0.0807492	0.0826105	0.117153	0.197956	0.311567	0.395009	0.398533	0.334698	0.24878	0.191107	0.158634	0.140347	0.12458	0.11456	0.105741	0.0990639	0.121146	0.199447	0.305531	0.405924	0.462106	0.49925	0.52492	0.55939	0.588917	0.625971	0.648641	0.686617	0.726183	0.781606	0.844736	0.91102	0.956919	0.982751	1	0.999584
0.119312	0.11371	0.10978	0.107512	0.099579	0.0891702	0.0765478	0.070729	0.0724909	0.0731234	0.0749304	0.104313	0.174473	0.273709	0.349913	0.437773	0.497407	0.558522	0.578906	0.602588	0.616367	0.652228	0.690303	0.762207	0.815723	0.844185	0.851738	0.862852	0.885838	0.889859	0.900078	0.928675	0.960127	0.982191	0.964789	0.950459	0.926217	0.906339	0.890952	0.864876	0.8536	0.814576	0.785798	0.747705	0.721286	0.690692	0.688713	0.679723
0.0854099	0.0708728	0.0737364	0.0625503	0.0722362	0.0580277	0.0627036	0.0487689	0.0815443	0.13569	0.222354	0.254915	0.257013	0.225891	0.218346	0.237044	0.278711	0.341886	0.392615	0.452389	0.488734	0.496822	0.471334	0.438318	0.431725	0.458746	0.489988	0.525918	0.540827	0.586354	0.62823	0.668829	0.704003	0.760054	0.824461	0.845809	0.82849	0.813554	0.830604	0.831349	0.78713	0.722099	0.672821	0.682972	0.700482	0.709188	0.678795	0.661257
0.153629	0.14134	0.134058	0.121038	0.103175	0.0899924	0.0872005	0.0916097	0.0901099	0.0883931	0.0857458	0.0824569	0.0790325	0.0785717	0.0749575	0.0724096	0.0682262	0.0701778	0.0707651	0.0708735	0.0688225	0.0649734	0.0669703	0.0710904	0.0766381	0.0732047	0.0763128	0.0801981	0.0530467	0.0470563	0.0424573	0.0727258	0.0734034	0.0767194	0.0797734	0.0812913	0.0802342	0.0816528	0.0839387	0.109825	0.162447	0.219722	0.233646	0.210082	0.167895	0.14181	0.12177	0.116222
0.190202	0.181791	0.167044	0.159805	0.147498	0.135381	0.120032	0.121822	0.140323	0.161785	0.172762	0.186907	0.222546	0.271601	0.29761	0.344954	0.39477	0.440087	0.443793	0.430282	0.424263	0.413698	0.420667	0.46901	0.527125	0.588456	0.617949	0.621292	0.606054	0.612263	0.656677	0.728304	0.784091	0.800469	0.808896	0.797887	0.786356	0.69078	0.596455	0.554449	0.566281	0.593873	0.568878	0.539607	0.482062	0.416818	0.36195	0.314384
0.00869782	0.0067612	0.0118802	0.0116311	0.012152	0.0413033	0.123468	0.229722	0.346667	0.426669	0.484122	0.520182	0.549174	0.567363	0.603796	0.652812	0.701352	0.680015	0.549174	0.378978	0.222157	0.148576	0.111452	0.0899228	0.0687105	0.0524021	0.0386872	0.0275657	0.0249156	0.02162	0.0217445	0.017407	0.0142019	0.0136809	0.0125258	0.013092	0.00979637	0.0110308	0.00929806	0.00832408	0.00903758	0.00821083	0.00856192	0.00988697	0.00990962	0.0107137	0.0104193	0.0146323
0.31817	0.249964	0.175043	0.147688	0.0957502	0.100661	0.116294	0.176358	0.229547	0.283782	0.33987	0.378122	0.390636	0.394485	0.399933	0.418719	0.393281	0.365324	0.332235	0.348803	0.3645	0.368365	0.355773	0.329416	0.323175	0.317362	0.32243	0.329717	0.342198	0.353904	0.353381	0.327293	0.267911	0.239637	0.219917	0.226823	0.159014	0.0932001	0.0851852	0.136569	0.188729	0.137915	0.139357	0.116643	0.157477	0.176009	0.233317	0.329336
0.294929	0.298132	0.279434	0.260697	0.24587	0.233332	0.226219	0.216041	0.198968	0.181891	0.171871	0.162776	0.153304	0.140508	0.134891	0.129152	0.126579	0.119132	0.110854	0.106457	0.115453	0.134129	0.137119	0.116554	0.105986	0.122735	0.183402	0.249265	0.341409	0.423906	0.525923	0.61124	0.685146	0.735809	0.763427	0.776442	0.783965	0.801043	0.828041	0.862739	0.873881	0.875162	0.875359	0.87658	0.86241	0.824225	0.785712	0.773649
0.0558979	0.0660827	0.0492452	0.0831895	0.091331	0.175407	0.299495	0.422251	0.51051	0.539052	0.543915	0.507421	0.460852	0.414474	0.381876	0.339395	0.283639	0.237657	0.216099	0.204552	0.202335	0.153058	0.173443	0.157588	0.209162	0.206168	0.257235	0.300176	0.388307	0.462959	0.52543	0.536661	0.497331	0.433054	0.382668	0.346427	0.325282	0.317188	0.310139	0.306195	0.292668	0.281327	0.347362	0.412605	0.508435	0.533889	0.556128	0.555241
0.822057	0.704705	0.561711	0.453804	0.374142	0.310664	0.255011	0.202881	0.166425	0.150558	0.14331	0.130456	0.112188	0.0949965	0.0868763	0.0780652	0.0745657	0.0641577	0.0574192	0.0502729	0.0568303	0.101305	0.153401	0.18014	0.152325	0.11109	0.0811004	0.0864232	0.135348	0.249156	0.415864	0.589968	0.704387	0.730855	0.693459	0.623525	0.533897	0.415989	0.320653	0.243596	0.205599	0.163152	0.133967	0.10383	0.0875331	0.0752112	0.0663209	0.0588122
0.552057	0.509371	0.453889	0.425812	0.397669	0.37419	0.34597	0.322432	0.302962	0.288737	0.267492	0.246062	0.229499	0.216829	0.206513	0.196904	0.189726	0.179077	0.168082	0.157213	0.147763	0.142594	0.137896	0.129224	0.111971	0.093141	0.089478	0.0775527	0.0769778	0.060612	0.0480461	0.0316365	0.0246555	0.027415	0.0302458	0.0249676	0.0149751	0	0.0355131	0.104595	0.194583	0.254319	0.274156	0.268571	0.243653	0.244315	0.259268	0.272015
0.404453	0.452893	0.488844	0.482279	0.43748	0.392949	0.371157	0.352371	0.335847	0.317493	0.305524	0.292887	0.276581	0.25923	0.244299	0.239776	0.234076	0.221346	0.211031	0.189764	0.179553	0.159064	0.150818	0.15291	0.170097	0.181891	0.179728	0.165169	0.15527	0.143	0.134431	0.123025	0.118596	0.113438	0.108149	0.102208	0.0973242	0.0929987	0.0906224	0.0889141	0.088476	0.0845393	0.0855139	0.0936393	0.0971764	0.0926428	0.0843969	0.0814348
0.587477	0.602709	0.588009	0.554509	0.492242	0.414324	0.353553	0.293427	0.252259	0.202485	0.169607	0.13929	0.116379	0.100059	0.0801377	0.0632857	0.0462298	0.0363202	0.03102	0.0242021	0.020612	0.0165009	0.0174523	0.0139188	0.0128882	0.00911685	0.00740674	0.00814288	0.00708963	0.0114725	0.0111101	0.0128768	0.0050624	0.00202723	0.000441686	0.00294457	0.00177807	0.00125711	0.00109855	0.00231036	0	0.00158554	0.00176674	0.00352216	0.00469999	0.00499445	0.00841469	0.00773517
0.433174	0.43706	0.442472	0.428819	0.396554	0.364813	0.365129	0.372773	0.374535	0.380236	0.386705	0.387591	0.387284	0.360674	0.33439	0.291391	0.279311	0.277965	0.271576	0.26911	0.26283	0.270031	0.2648	0.267574	0.271857	0.284343	0.308423	0.321289	0.334174	0.322319	0.310257	0.297147	0.288364	0.288726	0.275236	0.266535	0.273998	0.299722	0.317973	0.298113	0.255828	0.216949	0.203901	0.24129	0.30011	0.380281	0.436888	0.502096
0.452869	0.455324	0.427463	0.429363	0.431264	0.449464	0.420113	0.401708	0.370963	0.349199	0.343339	0.348819	0.390636	0.432135	0.467109	0.51458	0.540225	0.537437	0.473128	0.40261	0.339236	0.306607	0.267705	0.250424	0.222261	0.194874	0.160566	0.12377	0.110687	0.112144	0.120777	0.12282	0.107171	0.0855337	0.0805918	0.0753013	0.0426718	0.0371121	0	0.0524924	0.0572284	0.0964789	0.0857396	0.089557	0.0983163	0.103702	0.0989182	0.100233
0.568973	0.592131	0.582786	0.516576	0.455926	0.408313	0.372008	0.339474	0.323492	0.320134	0.321385	0.312166	0.335656	0.401042	0.518905	0.591862	0.603852	0.556397	0.488287	0.450478	0.417642	0.39892	0.373418	0.348439	0.328814	0.328244	0.329083	0.331982	0.335435	0.364548	0.37638	0.359162	0.30572	0.2745	0.246622	0.25592	0.27309	0.290292	0.298418	0.297705	0.32544	0.359289	0.407536	0.459965	0.507405	0.537912	0.553261	0.554211
0.445615	0.46836	0.521344	0.543345	0.530515	0.492801	0.462246	0.421174	0.376808	0.370472	0.374226	0.389669	0.417151	0.452964	0.492104	0.523197	0.5442	0.540795	0.514644	0.490758	0.468709	0.423883	0.384015	0.34771	0.363772	0.3795	0.4258	0.440324	0.461692	0.448482	0.442827	0.439453	0.480161	0.52947	0.556413	0.550109	0.550093	0.541919	0.516988	0.454453	0.393122	0.347774	0.300968	0.277494	0.242361	0.239558	0.23281	0.234125
0.206305	0.31088	0.395741	0.441044	0.465458	0.478767	0.485092	0.487378	0.491019	0.517393	0.544843	0.581002	0.597971	0.605262	0.619041	0.622926	0.651758	0.684168	0.733185	0.767005	0.782067	0.732399	0.674672	0.590218	0.53719	0.479679	0.435469	0.397819	0.369755	0.331337	0.30554	0.272299	0.253939	0.222406	0.206766	0.191957	0.178494	0.164408	0.148668	0.137988	0.126739	0.116963	0.116014	0.107639	0.104657	0.0951787	0.0939228	0.0781018
0.766255	0.734893	0.742385	0.718056	0.671329	0.554908	0.441417	0.339331	0.240857	0.148639	0.0795305	0.04226	0.039298	0.0810511	0.118924	0.173792	0.185529	0.219251	0.223797	0.246052	0.258803	0.285968	0.289611	0.318344	0.361776	0.421428	0.486924	0.545563	0.572205	0.547511	0.496191	0.435414	0.382082	0.334136	0.320023	0.306179	0.310503	0.307715	0.329717	0.344685	0.391095	0.40901	0.418276	0.385123	0.376222	0.386771	0.422933	0.460266
0.075609	0.149838	0.25929	0.356784	0.437973	0.474192	0.501366	0.550874	0.616184	0.67442	0.699825	0.684527	0.630174	0.571927	0.526295	0.486555	0.456715	0.423567	0.400576	0.373577	0.346797	0.323094	0.297388	0.284794	0.269327	0.251006	0.233222	0.217409	0.205112	0.188187	0.17439	0.171674	0.183807	0.205895	0.246752	0.306964	0.388399	0.452384	0.480543	0.464342	0.433225	0.413158	0.425768	0.474203	0.499795	0.497041	0.461434	0.428856
0.501243	0.557569	0.580806	0.582516	0.582215	0.507912	0.446961	0.403893	0.387642	0.374574	0.349928	0.325804	0.301174	0.294315	0.281944	0.275434	0.278476	0.297008	0.313117	0.304041	0.28177	0.265598	0.271142	0.252784	0.269352	0.252831	0.259848	0.228993	0.237625	0.272171	0.326897	0.395007	0.44449	0.472811	0.47533	0.481175	0.493593	0.503128	0.483661	0.438582	0.389068	0.391428	0.402024	0.422727	0.418101	0.438059	0.436365	0.438376
0.0723233	0.187366	0.33225	0.42847	0.488426	0.526512	0.604827	0.645315	0.660593	0.633616	0.641521	0.64861	0.641272	0.581565	0.537725	0.546479	0.585189	0.591644	0.557997	0.565732	0.57529	0.542073	0.455356	0.391175	0.364108	0.371401	0.393984	0.451607	0.493058	0.555301	0.576298	0.601339	0.603909	0.622404	0.653684	0.683254	0.714999	0.720413	0.727706	0.696448	0.691669	0.6698	0.672665	0.64322	0.627942	0.653639	0.691341	0.710458
0.62955	0.596559	0.552198	0.520714	0.471823	0.479966	0.494598	0.529389	0.496251	0.445231	0.38805	0.365682	0.379193	0.397472	0.4483	0.504994	0.578688	0.604578	0.571712	0.479026	0.366554	0.274876	0.208397	0.174659	0.149063	0.147659	0.177377	0.223991	0.281456	0.302045	0.31157	0.33037	0.413599	0.530035	0.610286	0.645371	0.638655	0.639426	0.634703	0.6169	0.57751	0.540307	0.51427	0.496863	0.475243	0.477089	0.519615	0.546502
0.452221	0.458717	0.491091	0.510888	0.506921	0.502476	0.509731	0.529067	0.546641	0.579755	0.62383	0.661381	0.673624	0.672061	0.672368	0.69202	0.725523	0.762116	0.776889	0.78812	0.783684	0.78972	0.783015	0.79487	0.805902	0.812823	0.786774	0.751247	0.717807	0.709883	0.735851	0.763625	0.795068	0.791635	0.770113	0.742808	0.732742	0.739094	0.733646	0.722596	0.713605	0.722017	0.718494	0.717193	0.711374	0.705727	0.704841	0.686526
0.65643	0.638431	0.625682	0.62701	0.650096	0.658092	0.644268	0.643075	0.641865	0.650276	0.659041	0.672639	0.6968	0.695851	0.701326	0.700278	0.723499	0.733763	0.72733	0.689996	0.662339	0.644873	0.656664	0.66841	0.677997	0.667769	0.639262	0.614831	0.595694	0.582204	0.578264	0.588881	0.608172	0.607223	0.597401	0.587002	0.593263	0.588104	0.59264	0.590263	0.612328	0.626586	0.634636	0.619773	0.603582	0.56885	0.53082	0.472975
0.722411	0.718781	0.717494	0.735946	0.754152	0.777395	0.772231	0.747466	0.724672	0.726742	0.752624	0.781999	0.805664	0.834415	0.815908	0.797002	0.750549	0.737863	0.72263	0.728133	0.724749	0.740315	0.757021	0.776157	0.768004	0.740819	0.712419	0.7046	0.710513	0.723824	0.728971	0.735667	0.740321	0.748485	0.715008	0.667795	0.59972	0.556421	0.491111	0.44894	0.414538	0.393009	0.362889	0.322454	0.290878	0.263665	0.241441	0.223378
0.921473	0.935851	0.930425	0.90964	0.898728	0.871926	0.864502	0.85469	0.82791	0.810843	0.784151	0.802784	0.813554	0.847304	0.883731	0.929866	0.97172	0.977042	0.981526	0.942465	0.936032	0.925617	0.935177	0.935336	0.935884	0.937335	0.931525	0.932265	0.924747	0.90693	0.881738	0.887274	0.89685	0.885943	0.871844	0.842436	0.835461	0.828392	0.850917	0.87283	0.883397	0.906043	0.912685	0.91102	0.909038	0.912975	0.924095	0.931564
AVA::Chrimson, WT
Time relative to stim onset (s)
-10	-9.5	-9	-8.5	-8	-7.5	-7	-6.5	-6	-5.5	-5	-4.5	-4	-3.5	-3	-2.5	-2	-1.5	-1	-0.5	0	0.5	1	1.5	2	2.5	3	3.5	4	4.5	5	5.5	6	6.5	7	7.5	8	8.5	9	9.5	10	10.5	11	11.5	12	12.5	13	13.5	14	14.5
Calcium activity in AIY (dR/R0)
0.580095	0.592937	0.593456	0.580379	0.575799	0.574949	0.582834	0.584533	0.578585	0.55276	0.552051	0.554034	0.58104	0.558614	0.567348	0.566593	0.569661	0.525424	0.479722	0.463623	0.477503	0.48468	0.500307	0.484066	0.481611	0.450168	0.426892	0.419291	0.451301	0.464756	0.464662	0.465889	0.460979	0.442472	0.430339	0.443416	0.455739	0.466692	0.485105	0.524102	0.528256	0.511779	0.486899	0.477976	0.49535	0.50465	0.505878	0.496152	0.484444	0.463859
0.547094	0.542278	0.546197	0.559464	0.543553	0.547	0.549219	0.537604	0.553987	0.573722	0.595014	0.628535	0.651386	0.674661	0.661631	0.665833	0.655068	0.672584	0.664416	0.649733	0.61253	0.611019	0.617582	0.635381	0.572872	0.567065	0.553845	0.5707	0.581276	0.550163	0.557197	0.554365	0.581889	0.584061	0.596903	0.57646	0.578112	0.542515	0.542278	0.507578	0.494641	0.466173	0.458807	0.432369	0.420896	0.394741	0.39611	0.389075	0.395307	0.391058
0.573391	0.574855	0.587224	0.594873	0.57037	0.559605	0.574052	0.576366	0.561258	0.533733	0.533639	0.555451	0.565318	0.570795	0.557245	0.566357	0.590388	0.590954	0.55394	0.527359	0.544781	0.568953	0.564374	0.549219	0.538738	0.536613	0.541334	0.528917	0.5055	0.504603	0.52193	0.566923	0.56494	0.580284	0.596478	0.582267	0.589491	0.553468	0.574855	0.573675	0.585289	0.590388	0.60068	0.631462	0.666918	0.712006	0.761343	0.769699	0.734007	0.686228
0.716586	0.705868	0.701053	0.67603	0.657382	0.680421	0.681979	0.679855	0.661017	0.663566	0.652566	0.63878	0.623247	0.598083	0.581606	0.581701	0.594542	0.613522	0.602521	0.584769	0.559275	0.58392	0.58746	0.60677	0.618809	0.654738	0.638261	0.621925	0.607809	0.636892	0.62641	0.611161	0.590671	0.559558	0.546575	0.514518	0.517634	0.500543	0.51787	0.512913	0.515745	0.558803	0.574147	0.600916	0.589679	0.595911	0.61711	0.641046	0.685048	0.666541
0.513904	0.501015	0.52887	0.556159	0.568387	0.592607	0.637222	0.708748	0.740617	0.751759	0.751098	0.732354	0.736415	0.708512	0.714178	0.676455	0.696143	0.695293	0.725414	0.723431	0.695671	0.676644	0.669846	0.697229	0.670979	0.647798	0.629196	0.62438	0.578679	0.575185	0.561871	0.584533	0.561588	0.599311	0.612955	0.618148	0.587885	0.582834	0.593881	0.620698	0.607384	0.589727	0.584628	0.598744	0.604362	0.563335	0.543034	0.557764	0.588263	0.586847
0.927246	0.878854	0.795194	0.754025	0.738917	0.734385	0.714744	0.697087	0.689627	0.700911	0.722629	0.756574	0.776262	0.756149	0.70719	0.663708	0.653085	0.656437	0.659506	0.657854	0.678344	0.663519	0.634484	0.581842	0.59407	0.612908	0.604835	0.57967	0.556253	0.534158	0.512582	0.523582	0.581087	0.580048	0.588405	0.606865	0.654643	0.691422	0.676503	0.673339	0.662103	0.718899	0.801615	0.86672	0.884755	0.863226	0.856381	0.897786	0.93971	0.996931
NaN	NaN	NaN	NaN	NaN	NaN	NaN	NaN	NaN	NaN	NaN	NaN	NaN	NaN	NaN	NaN	0.692885	0.703177	0.715169	0.700014	0.666399	0.633209	0.643312	0.653557	0.667674	0.711015	0.725509	0.74378	0.756244	0.768991	0.788537	0.799065	0.813276	0.86927	0.88197	0.892026	0.883953	0.903971	0.949483	0.945234	0.934989	0.934894	0.935319	0.918417	0.900666	0.892781	0.881686	0.841698	0.824276	0.785279
AVA::Chrimson, RIM ablated
Time relative to stim onset (s)
-10	-9.5	-9	-8.5	-8	-7.5	-7	-6.5	-6	-5.5	-5	-4.5	-4	-3.5	-3	-2.5	-2	-1.5	-1	-0.5	0	0.5	1	1.5	2	2.5	3	3.5	4	4.5	5	5.5	6	6.5	7	7.5	8	8.5	9	9.5	10	10.5	11	11.5	12	12.5	13	13.5	14	14.5
Calcium activity in AIY (dR/R0)
0.138878	0.138613	0.145274	0.132079	0.116671	0.11281	0.119333	0.126639	0.128645	0.13791	0.131076	0.135674	0.118734	0.145908	0.126075	0.110252	0.110091	0.152926	0.179178	0.190794	0.200463	0.23295	0.264722	0.26894	0.257969	0.239104	0.258637	0.275716	0.283921	0.233492	0.235289	0.217554	0.209302	0.184064	0.189054	0.19855	0.186438	0.203102	0.235566	0.277583	0.255791	0.276488	0.273446	0.318229	0.279715	0.308814	0.302475	0.330156
0.0159321	0.0638722	0.094873	0.119706	0.184072	0.227469	0.255612	0.195851	0.197147	0.20722	0.229031	0.184956	0.161233	0.113724	0.104206	0.0826823	0.133706	0.210262	0.266734	0.301846	0.343516	0.36837	0.345592	0.32078	0.29537	0.313584	0.273127	0.231745	0.199963	0.232958	0.207096	0.250843	0.269365	0.368288	0.374394	0.410842	0.490934	0.587164	0.652372	0.684997	0.73894	0.761368	0.768913	0.732526	0.70169	0.666351	0.620611	0.57964
0.0366239	0.091237	0.114827	0.144271	0.132978	0.152511	0.165303	0.229758	0.259894	0.288854	0.3227	0.373764	0.405294	0.424862	0.418374	0.476664	0.491034	0.555247	0.551686	0.56374	0.556434	0.579505	0.564201	0.547537	0.545947	0.546247	0.530608	0.501752	0.471478	0.432779	0.367818	0.327955	0.276961	0.242181	0.176585	0.156764	0.147844	0.150644	0.182048	0.166421	0.16581	0.169371	0.169267	0.237318	0.263374	0.323795	0.373418	0.431811
0.0907702	0.102174	0.132812	0.205685	0.310647	0.319033	0.275902	0.157835	0.135659	0.0804172	0.115277	0.0810475	0.13669	0.136747	0.207041	0.186564	0.182686	0.134169	0.134684	0.15243	0.178866	0.187309	0.16859	0.136537	0.108936	0.0968635	0.161293	0.183718	0.165992	0.0956028	0.0993276	0.0926803	0.165056	0.211969	0.31143	0.290858	0.28402	0.196057	0.131132	0.119766	0.103263	0.125115	0.08057	0.121466	0.120683	0.139632	0.130807	0.15518
0.100583	0.147463	0.213419	0.235937	0.281242	0.320326	0.312716	0.282693	0.224367	0.196376	0.15302	0.0764063	0.134007	0.152978	0.232682	0.223745	0.24985	0.266023	0.300462	0.362002	0.386697	0.43648	0.366875	0.338448	0.297891	0.271144	0.204918	0.141969	0.122354	0.188455	0.161542	0.158909	0.151382	0.241162	0.375003	0.456634	0.495366	0.501109	0.434365	0.348317	0.31224	0.342056	0.39412	0.371105	0.289867	0.219225	0.156752	0.141015
0.240775	0.272098	0.297071	0.296575	0.279969	0.285224	0.269839	0.265944	0.251999	0.248104	0.227372	0.213831	0.20218	0.235393	0.254258	0.284843	0.283783	0.346498	0.432918	0.503077	0.561551	0.618169	0.639581	0.648616	0.644214	0.67836	0.676919	0.590165	0.492014	0.34727	0.276292	0.199668	0.173969	0.140929	0.145988	0.139696	0.126374	0.103326	0.105999	0.105815	0.131445	0.125637	0.150172	0.148777	0.185908	0.158849	0.15326	0.151509
0.0585728	0.067602	0.0861663	0.087042	0.138648	0.22139	0.373776	0.506801	0.582479	0.633326	0.661309	0.675573	0.664247	0.648096	0.608846	0.592909	0.596314	0.551538	0.498511	0.446088	0.428068	0.421335	0.389733	0.399152	0.40207	0.433964	0.432427	0.444122	0.460955	0.520306	0.522583	0.497791	0.410419	0.329273	0.293	0.278484	0.296795	0.28691	0.334254	0.341279	0.404192	0.43412	0.488373	0.508513	0.489424	0.489813	0.442916	0.376112
0.15331	0.1852	0.204752	0.166083	0.087831	0.044579	0.0599225	0.14031	0.172344	0.196894	0.204421	0.203405	0.169607	0.169379	0.205976	0.304381	0.371146	0.472268	0.499368	0.605922	0.693089	0.789131	0.753053	0.670261	0.533807	0.506521	0.501337	0.531174	0.538099	0.592527	0.617056	0.592942	0.581414	0.579444	0.519646	0.403595	0.301644	0.282506	0.288934	0.249891	0.255883	0.22248	0.222377	0.173319	0.146343	0.197454	0.214145	0.225881
0.233805	0.274028	0.304929	0.297029	0.322676	0.328533	0.348985	0.37185	0.40244	0.450135	0.433459	0.430656	0.357898	0.305435	0.223939	0.145206	0.0820409	0.0695674	0.0941641	0.123509	0.152503	0.195859	0.242348	0.266127	0.253829	0.194497	0.120765	0.0882095	0.0432583	0.0341902	0	0.043375	0.0296172	0.0801144	0.101734	0.163265	0.126058	0.126525	0.152017	0.1836	0.164218	0.161357	0.214462	0.285139	0.32579	0.335733	0.306739	0.242562
0.304568	0.277613	0.29843	0.317029	0.339153	0.370296	0.332248	0.330133	0.342885	0.389454	0.456344	0.481184	0.461548	0.413403	0.388646	0.309979	0.252835	0.196148	0.191545	0.214933	0.196624	0.197744	0.115926	0.101246	0.0816936	0.132244	0.127123	0.141326	0.142591	0.0972651	0.055506	0.0195111	0.0568123	0.135727	0.206038	0.242406	0.225362	0.292148	0.363267	0.387277	0.370317	0.392337	0.408095	0.447303	0.465094	0.568206	0.532688	0.502105
0.125464	0.170147	0.306351	0.397437	0.461672	0.433266	0.434469	0.451326	0.471832	0.495718	0.496672	0.590806	0.585955	0.598478	0.58724	0.600759	0.650376	0.699766	0.755956	0.700015	0.575401	0.516598	0.50903	0.583321	0.606274	0.598955	0.591117	0.509714	0.480561	0.415932	0.462896	0.465114	0.522341	0.5257	0.550934	0.526115	0.495076	0.407079	0.299509	0.224243	0.224948	0.28062	0.294387	0.306185	0.34612	0.390823	0.377263	0.385038
0.433049	0.446688	0.386958	0.309234	0.289693	0.316148	0.375516	0.326578	0.325011	0.340044	0.436373	0.535853	0.593884	0.556139	0.483305	0.318689	0.194854	0.0810666	0.12416	0.534173	0.515396	0.445886	0.0473143	0.101945	0.147234	0.162019	0.220737	0.26723	0.292978	0.261728	0.271489	0.346233	0.386041	0.442084	0.519808	0.661809	0.754183	0.81059	0.80314	0.781346	0.737947	0.72597	0.757411	0.762741	0.798193	0.821936	0.852881	0.880157
0.207805	0.196669	0.328755	0.503133	0.670385	0.715159	0.635888	0.551268	0.397024	0.265721	0.106013	0.0206296	0	0.0116519	0.0218521	0.0397884	0.0375153	0.0529493	0.0742283	0.131628	0.174626	0.272693	0.345183	0.377521	0.35097	0.352556	0.427338	0.499255	0.534994	0.524908	0.553771	0.578087	0.585269	0.524622	0.52913	0.55633	0.604714	0.601562	0.644579	0.677663	0.683852	0.678083	0.668418	0.676669	0.665457	0.676077	0.68154	0.71535
0.511167	0.517171	0.488061	0.43233	0.375516	0.417049	0.414871	0.381324	0.306221	0.284544	0.250282	0.236038	0.195911	0.169867	0.173566	0.192512	0.233031	0.202734	0.207435	0.230691	0.261634	0.28429	0.266589	0.277514	0.29782	0.306232	0.322769	0.294973	0.278044	0.2917	0.297048	0.322458	0.262486	0.300309	0.289903	0.309551	0.28535	0.283737	0.274921	0.261864	0.262106	0.278286	0.26569	0.264665	0.299479	0.316696	0.305633	0.242146
0.517382	0.449171	0.338172	0.231109	0.216763	0.243716	0.283943	0.327456	0.354199	0.328985	0.349824	0.384761	0.45897	0.480249	0.490105	0.554134	0.6369	0.762187	0.839987	0.921665	0.946	1	0.936067	0.791488	0.604619	0.50787	0.496084	0.502884	0.489991	0.469113	0.35926	0.241882	0.159268	0.236381	0.350416	0.401666	0.34461	0.22576	0.175733	0.214834	0.34566	0.441053	0.487966	0.46344	0.383042	0.256074	0.178236	0.166966
0.38143	0.368844	0.35912	0.376827	0.33231	0.344233	0.404404	0.544403	0.649319	0.71712	0.741898	0.766385	0.811089	0.820834	0.831989	0.802152	0.840988	0.879616	0.90176	0.879678	0.851065	0.821228	0.772004	0.80831	0.849074	0.886064	0.922059	0.913641	0.844471	0.700678	0.643161	0.672624	0.656348	0.635261	0.608721	0.63099	0.599618	0.556097	0.518568	0.540567	0.540733	0.568392	0.564868	0.587551	0.613656	0.608327	0.548985	0.465923
0.558641	0.558271	0.59108	0.642258	0.722334	0.789527	0.847944	0.802214	0.741443	0.65804	0.622701	0.533383	0.4363	0.394948	0.411528	0.421939	0.430131	0.4183	0.417385	0.410827	0.435541	0.51583	0.535718	0.609197	0.637763	0.78474	0.842145	0.886824	0.866664	0.857012	0.866664	0.846835	0.764249	0.633871	0.471112	0.355271	0.311214	0.251163	0.229582	0.211427	0.240207	0.243165	0.188309	0.214384	0.314036	0.463017	0.563136	0.571367
0.681617	0.643127	0.640358	0.678121	0.715465	0.68834	0.666049	0.658676	0.695981	0.730631	0.70259	0.682266	0.646107	0.633519	0.629202	0.616519	0.60714	0.587924	0.58057	0.59268	0.593865	0.591859	0.582404	0.552223	0.554668	0.539387	0.550619	0.537229	0.494747	0.475244	0.455417	0.439162	0.40029	0.363787	0.339299	0.324534	0.325489	0.318803	0.302414	0.283542	0.294812	0.350798	0.369995	0.422792	0.448579	0.500688	0.532262	0.524049
0.75222	0.742887	0.708844	0.651879	0.642402	0.647952	0.668839	0.697147	0.743504	0.826515	0.914234	0.992065	1	0.934401	0.874229	0.839795	0.835889	0.772613	0.707323	0.624784	0.626161	0.592653	0.564551	0.473769	0.472391	0.501151	0.586773	0.609078	0.614176	0.57263	0.549811	0.579763	0.605152	0.611545	0.628731	0.68952	0.770352	0.739248	0.698113	0.689869	0.749815	0.788525	0.792205	0.775409	0.710797	0.625154	0.586876	0.582888
0.799249	0.814261	0.812623	0.832694	0.816874	0.77555	0.660059	0.538991	0.478094	0.520911	0.596094	0.719049	0.714176	0.69678	0.642248	0.517966	0.431939	0.322088	0.34925	0.334322	0.318937	0.313919	0.276099	0.219971	0.14145	0.13946	0.122851	0.115636	0.0904228	0.0691285	0.0729229	0.0837256	0.126293	0.174874	0.223496	0.27724	0.265774	0.226876	0.176512	0.193307	0.194551	0.200709	0.169504	0.15866	0.148334	0.165398	0.151506	0.158929
0.83646	0.841104	0.865328	0.864821	0.82005	0.768318	0.751193	0.704808	0.724019	0.711918	0.680354	0.690599	0.63504	0.663125	0.618837	0.637391	0.650517	0.682854	0.640733	0.587008	0.525757	0.587849	0.608696	0.618688	0.600744	0.641298	0.653894	0.647602	0.614401	0.566045	0.525607	0.50038	0.489317	0.512711	0.506949	0.551997	0.527842	0.491564	0.417245	0.349264	0.345126	0.371286	0.452728	0.46779	0.439901	0.440063	0.419596	0.387305
0.872496	0.964471	0.979498	0.960852	0.898748	0.912359	0.95305	0.990389	0.989098	0.979187	0.983993	0.937504	0.892283	0.826181	0.85241	0.87464	0.888434	0.80508	0.749153	0.691647	0.711296	0.768479	0.754224	0.772755	0.746883	0.764814	0.716401	0.671837	0.648674	0.608339	0.543665	0.502777	0.503515	0.492313	0.50333	0.50484	0.603775	0.639731	0.703621	0.678475	0.679201	0.623055	0.624058	0.694344	0.78966	0.782078	0.783599	0.75034
[truncated: 142 more columns]

## Sheet: Fig 4E-AVBChrimson
AVB::Chrimson no ATR control
Time relative to stim onset (s)
-10	-9.5	-9	-8.5	-8	-7.5	-7	-6.5	-6	-5.5	-5	-4.5	-4	-3.5	-3	-2.5	-2	-1.5	-1	-0.5	0	0.5	1	1.5	2	2.5	3	3.5	4	4.5	5	5.5	6	6.5	7	7.5	8	8.5	9	9.5	10	10.5	11	11.5	12	12.5	13	13.5	14	14.5
Calcium activity in AIY (dR/R0)
0.0464062	0.0476428	0.0454299	0.0388996	0.0240817	0.0297659	0.044779	0.0508754	0.043499	0.034105	0.0495737	0.0414163	0.0415898	0.0248411	0.0322175	0.039659	0.0333022	0.0298744	0.025557	0.0357104	0.031111	0.0335409	0.0372942	0.0435858	0.0474259	0.0274662	0.0201766	0.00572755	0.011607	0.00904693	0.0196776	0.0252533	0.0282038	0.0324561	0.0408956	0.0493567	0.0467316	0.0460591	0.056603	0.0550843	0.0521771	0.0512008	0.0468618	0.0476862	0.039941	0.0371423	0.0413729	0.0429783	0.0426529	0.0361443
0.0389163	0.0344213	0.0348263	0.0280432	0.0365878	0.0267879	0.0338139	0.0312019	0.0408399	0.0399085	0.0437556	0.0371345	0.037013	0.0428444	0.0534543	0.0610472	0.0668381	0.0693083	0.0809711	0.077448	0.0818012	0.0900421	0.101887	0.109824	0.0943752	0.0886045	0.0732769	0.0935045	0.0938285	0.1193	0.100389	0.114542	0.110594	0.130396	0.122459	0.126448	0.131125	0.142788	0.141249	0.137341	0.14216	0.151899	0.158095	0.152972	0.156415	0.164331	0.175792	0.178424	0.197032	0.214546
0.0355552	0.0453147	0.0457804	0.0476634	0.0406576	0.0477444	0.0523002	0.0675468	0.0656637	0.0682554	0.0700373	0.0743298	0.0780756	0.0842107	0.0798372	0.0702195	0.0609257	0.0595084	0.060784	0.0551753	0.05801	0.0542844	0.0566939	0.0524824	0.0621001	0.0520167	0.0533328	0.0440593	0.0593059	0.065522	0.0781971	0.081376	0.0912975	0.0983437	0.0990524	0.0954483	0.0827934	0.074755	0.0693083	0.0711711	0.077448	0.086681	0.104762	0.113631	0.126529	0.125516	0.126893	0.11602	0.124625	0.144286
0.0623836	0.0611282	0.0509435	0.0441605	0.0369928	0.0500526	0.0537175	0.0594476	0.0488378	0.0573419	0.0551146	0.0630922	0.0591844	0.0742691	0.070179	0.0756459	0.0734186	0.0717988	0.0647728	0.0634972	0.0742893	0.0817405	0.086276	0.0813558	0.0814368	0.0717178	0.0762736	0.0653398	0.0733579	0.0676683	0.072224	0.0681542	0.0728112	0.0871062	0.0976148	0.105451	0.105957	0.0990726	0.083745	0.0824289	0.0793918	0.0975136	0.0930185	0.0974123	0.0879363	0.0925326	0.109743	0.113064	0.116445	0.105916
0.077529	0.0789261	0.0809306	0.0715153	0.0471977	0.0385924	0.0474812	0.0636187	0.0709079	0.0695108	0.0683567	0.0660484	0.0631732	0.0612294	0.0542642	0.0523811	0.0513688	0.0560865	0.0618166	0.0614724	0.0671216	0.0616749	0.0793715	0.0812951	0.0891107	0.0757269	0.0731554	0.0732972	0.0754434	0.0736211	0.0759091	0.074917	0.0892727	0.105694	0.143112	0.16425	0.202215	0.236555	0.271483	0.279359	0.272495	0.272171	0.280615	0.305925	0.333786	0.33004	0.313011	0.274419	0.254617	0.212116
0.15524	0.13074	0.106119	0.0950433	0.0848992	0.0790678	0.0709282	0.0664129	0.0510245	0.039868	0.0342998	0.0394023	0.0405159	0.0366486	0.0338341	0.0365878	0.0379242	0.0380659	0.0439176	0.0453349	0.0424597	0.0417915	0.0462461	0.0445857	0.0356564	0.0308172	0.0351502	0.044525	0.0447882	0.0459018	0.0598526	0.0624241	0.0702397	0.0597514	0.0717583	0.0737021	0.0834616	0.0859521	0.0873087	0.0898194	0.104013	0.129181	0.136349	0.134324	0.130558	0.138819	0.134243	0.132036	0.137463	0.166964
0.0877379	0.0769766	0.0621157	0.0662884	0.0465593	0.0519034	0.0402269	0.0612006	0.0512445	0.0503294	0.0426428	0.052123	0.0644217	0.0811859	0.0849561	0.0935578	0.0883236	0.102013	0.0920571	0.0755857	0.052672	0.0400805	0.0444729	0.0277452	0.0286237	0.0210102	0.0433748	0.0620791	0.0845534	0.114678	0.136054	0.161493	0.169217	0.173499	0.186347	0.209261	0.243631	0.253953	0.256589	0.248975	0.253551	0.254868	0.268631	0.289385	0.319619	0.348243	0.352233	0.323865	0.281552	0.259553
0.0942537	0.0934842	0.0963999	0.108427	0.12256	0.1291	0.136288	0.140803	0.139204	0.134203	0.117053	0.116526	0.104479	0.107314	0.0941727	0.105491	0.108306	0.122074	0.116142	0.108974	0.11436	0.112315	0.115757	0.11517	0.118511	0.113246	0.107233	0.118592	0.128999	0.141775	0.143112	0.153904	0.174476	0.181178	0.177675	0.155584	0.146878	0.141127	0.134041	0.127825	0.133818	0.149287	0.140905	0.141006	0.120211	0.133049	0.116526	0.134182	0.146048	0.182919
0.21404	0.189459	0.167875	0.134648	0.120394	0.105471	0.101705	0.0920062	0.08415	0.0818822	0.0770025	0.0872884	0.0882603	0.0964202	0.088888	0.0896777	0.091581	0.109865	0.12665	0.139528	0.157204	0.172329	0.179801	0.168664	0.146169	0.135539	0.126893	0.11764	0.113206	0.109176	0.0973111	0.0971694	0.101219	0.117053	0.116223	0.103142	0.111485	0.117944	0.123107	0.114744	0.118855	0.124909	0.130599	0.11355	0.11029	0.104418	0.107921	0.116385	0.136794	0.169373
0.0944561	0.112517	0.115372	0.124241	0.125172	0.132056	0.129667	0.142484	0.147121	0.1569	0.153236	0.151555	0.143456	0.140824	0.140277	0.159107	0.168725	0.175083	0.165425	0.168138	0.170548	0.180226	0.175974	0.183142	0.174678	0.1814	0.1797	0.173585	0.160282	0.142444	0.140297	0.133575	0.145096	0.151008	0.14866	0.134749	0.12584	0.132664	0.131753	0.14212	0.144367	0.148072	0.161861	0.16666	0.181988	0.172775	0.166255	0.157123	0.146979	0.137787
0.482438	0.468596	0.38418	0.310958	0.232985	0.174235	0.12362	0.113097	0.096045	0.102922	0.0859567	0.0812488	0.064218	0.0613108	0.0484455	0.0378582	0.042501	0.0480116	0.0687306	0.0687957	0.0893845	0.0903608	0.120821	0.143579	0.184019	0.19964	0.207602	0.203285	0.193652	0.197622	0.197861	0.218254	0.209555	0.203632	0.182761	0.188141	0.162172	0.139956	0.11275	0.102185	0.108064	0.101035	0.120995	0.117523	0.117176	0.123923	0.140108	0.186926	0.212505	0.264487
0.196925	0.162958	0.151574	0.145827	0.148023	0.159919	0.167057	0.178624	0.192094	0.209004	0.220461	0.221303	0.210176	0.178331	0.181076	0.201684	0.224488	0.231113	0.224158	0.231625	0.244729	0.274488	0.298939	0.300952	0.299817	0.284773	0.263873	0.24407	0.224524	0.256442	0.258163	0.275329	0.278441	0.297145	0.2944	0.278514	0.269656	0.273133	0.288946	0.282211	0.306552	0.30754	0.315886	0.319107	0.358053	0.39451	0.401061	0.387335	0.361493	0.353331
0.196925	0.162958	0.151574	0.145827	0.148023	0.159919	0.167057	0.178624	0.192094	0.209004	0.220461	0.221303	0.210176	0.178331	0.181076	0.201684	0.224488	0.231113	0.224158	0.231625	0.244729	0.274488	0.298939	0.300952	0.299817	0.284773	0.263873	0.24407	0.224524	0.256442	0.258163	0.275329	0.278441	0.297145	0.2944	0.278514	0.269656	0.273133	0.288946	0.282211	0.306552	0.30754	0.315886	0.319107	0.358053	0.39451	0.401061	0.387335	0.361493	0.353331
0.48847	0.484773	0.470827	0.439898	0.421816	0.406552	0.370974	0.31336	0.258346	0.228184	0.210212	0.20377	0.175732	0.167826	0.136567	0.138873	0.125549	0.114898	0.108163	0.113324	0.134297	0.12694	0.105966	0.0856515	0.0754392	0.0795022	0.067899	0.0609444	0.0620425	0.0681552	0.0942533	0.114385	0.126867	0.111676	0.126574	0.136896	0.152892	0.132064	0.1209	0.131845	0.158712	0.171852	0.155161	0.148426	0.139165	0.155966	0.146376	0.152306	0.143119	0.142533
0.104897	0.140781	0.173866	0.198099	0.249387	0.331525	0.409975	0.469898	0.503417	0.578309	0.642375	0.660556	0.665676	0.678932	0.701148	0.681427	0.658495	0.674462	0.717311	0.704706	0.632591	0.50563	0.40952	0.351225	0.302953	0.239689	0.181828	0.145358	0.130627	0.119064	0.116569	0.126245	0.13399	0.137027	0.126744	0.117957	0.114551	0.109713	0.103053	0.101968	0.103703	0.119281	0.11147	0.11288	0.107869	0.140455	0.147419	0.15907	0.140694	0.154492
0.383272	0.392716	0.39451	0.391984	0.379173	0.397108	0.373463	0.398499	0.40022	0.425146	0.408016	0.39052	0.387189	0.352379	0.361676	0.347291	0.343558	0.314714	0.287592	0.288726	0.302745	0.282723	0.267936	0.240081	0.257284	0.265154	0.269034	0.247035	0.238763	0.242643	0.278367	0.299817	0.324414	0.378367	0.438214	0.489714	0.492789	0.482138	0.45593	0.44817	0.421376	0.43104	0.439312	0.476611	0.468521	0.449378	0.404319	0.365373	0.31541	0.28104
0.465429	0.426594	0.413837	0.416506	0.406591	0.419304	0.425683	0.432018	0.418871	0.438505	0.451348	0.454299	0.42859	0.434014	0.429371	0.42718	0.423752	0.40696	0.393878	0.369275	0.383355	0.375328	0.365435	0.354349	0.358059	0.331265	0.310655	0.316339	0.318617	0.305751	0.284837	0.289306	0.27783	0.271213	0.261602	0.252446	0.239928	0.23125	0.243855	0.235372	0.217387	0.18582	0.153885	0.148613	0.156662	0.168377	0.163105	0.148135	0.151173	0.155295
0.377042	0.379515	0.396004	0.42117	0.454256	0.455037	0.467642	0.482785	0.484694	0.503395	0.483349	0.490378	0.489575	0.516282	0.545918	0.532641	0.522531	0.491528	0.49027	0.452867	0.454885	0.442171	0.443451	0.440262	0.453084	0.439394	0.430304	0.395895	0.403098	0.364068	0.339661	0.286725	0.256915	0.239038	0.241034	0.25544	0.242401	0.226998	0.204478	0.19209	0.18428	0.17558	0.176751	0.188076	0.213308	0.226325	0.222832	0.218558	0.219578	0.231575
0.495021	0.513874	0.490118	0.502636	0.471915	0.474562	0.455297	0.487601	0.489207	0.474714	0.450068	0.446944	0.467425	0.491246	0.485171	0.472263	0.452021	0.46558	0.478489	0.473347	0.482134	0.486169	0.550192	0.580739	0.623175	0.606947	0.592628	0.588636	0.562602	0.529581	0.48515	0.456924	0.436075	0.41195	0.398651	0.365196	0.364112	0.380448	0.398325	0.391209	0.380752	0.393444	0.383789	0.346777	0.327208	0.319571	0.326232	0.316078	0.309223	0.320005
0.919454	0.884506	0.849862	0.835223	0.829513	0.844983	0.854216	0.892099	0.542541	0.550741	0.184802	0.486252	0.19361	0.264376	0.0414068	0.0644286	0.0878149	0.0950838	0.10132	0.0967846	0.100996	0.109925	0.125739	0.156151	0.175933	0.19201	0.216976	0.245545	0.292824	0.296793	0.313679	0.318579	0.338483	0.329675	0.309751	0.266684	0.241314	0.211003	0.204058	0.190795	0.175427	0.168786	0.151919	0.143355	0.145177	0.147566	0.146493	0.134263	0.127764	0.127926
0.622767	0.609041	0.600256	0.587408	0.583455	0.580234	0.561457	0.572767	0.578514	0.601611	0.596633	0.59235	0.557796	0.518668	0.463616	0.432321	0.443851	0.462335	0.492167	0.52284	0.547548	0.558163	0.516545	0.512408	0.517643	0.532101	0.507687	0.472767	0.433712	0.416398	0.39784	0.39795	0.397694	0.38481	0.37705	0.330857	0.314275	0.287042	0.278001	0.264861	0.250146	0.257467	0.248023	0.235615	0.212628	0.200842	0.201501	0.201281	0.213067	0.208346
0.51552	0.483089	0.500769	0.512006	0.529356	0.537116	0.553367	0.56541	0.59396	0.612848	0.657467	0.70011	0.750805	0.792643	0.78653	0.813836	0.802343	0.779283	0.72123	0.699927	0.710212	0.699707	0.69019	0.669143	0.627233	0.578734	0.533419	0.521706	0.50787	0.503514	0.510249	0.509444	0.510908	0.491435	0.490154	0.507687	0.553075	0.61541	0.609993	0.591215	0.538982	0.531662	0.528184	0.521999	0.510102	0.494766	0.486274	0.466142	0.426867	0.394107
0.593084	0.603454	0.624129	0.657453	0.671968	0.68774	0.735578	0.747532	0.739657	0.707353	0.708849	0.680841	0.658603	0.669538	0.669321	0.620593	0.575489	0.550192	0.543922	0.558957	0.560085	0.566247	0.537088	0.538997	0.523919	0.536329	0.549628	0.559651	0.569739	0.567028	0.58037	0.544877	0.507149	0.488013	0.495889	0.505153	0.494413	0.503916	0.526718	0.505413	0.469789	0.431128	0.435446	0.435207	0.421366	0.413881	0.411125	0.408934	0.415074	0.423405
0.681881	0.67328	0.649451	0.638177	0.615154	0.61702	0.62134	0.674085	0.708163	0.722328	0.732906	0.703843	0.714348	0.676611	0.653441	0.647438	0.635029	0.615154	0.569693	0.557467	0.571925	0.549561	0.539898	0.536237	0.567936	0.5847	0.607247	0.60787	0.576171	0.534956	0.515739	0.532394	0.525	0.503477	0.477672	0.481662	0.496559	0.524158	0.533565	0.534553	0.56131	0.559224	0.566984	0.535432	0.541398	0.563909	0.549817	0.536091	0.505015	0.495168
0.712863	0.718721	0.712125	0.711344	0.707917	0.687545	0.64244	0.627167	0.610179	0.639316	0.640488	0.633762	0.640813	0.646931	0.665264	0.655457	0.629879	0.618641	0.600373	0.600959	0.610006	0.596707	0.599722	0.582366	0.595318	0.597683	0.609181	0.620875	0.619009	0.630356	0.63105	0.64103	0.625019	0.603823	0.60545	0.59662	0.586466	0.535244	0.506281	0.514633	0.514981	0.537804	0.513657	0.495346	0.443733	0.433819	0.438787	0.452477	0.446076	0.46903
0.810066	0.778551	0.736823	0.678258	0.680271	0.662811	0.673536	0.65776	0.669985	0.666398	0.653404	0.64612	0.646193	0.652489	0.639714	0.651135	0.613836	0.580015	0.580271	0.614019	0.626464	0.622657	0.610139	0.634444	0.624671	0.653331	0.649744	0.643668	0.628258	0.633382	0.67306	0.699597	0.754209	0.755747	0.780564	0.782467	0.813946	0.812848	0.843119	0.86563	0.893485	0.872365	0.849854	0.851903	0.854832	0.845534	0.835176	0.81713	0.791874	0.731918
0.683488	0.712039	0.721823	0.724275	0.722322	0.706311	0.721086	0.744018	0.746838	0.771961	0.776994	0.781746	0.765279	0.752587	0.778339	0.812705	0.837611	0.84041	0.802248	0.787712	0.773957	0.767687	0.78654	0.795457	0.811381	0.800165	0.782266	0.801684	0.770855	0.794611	0.772091	0.800859	0.787061	0.783373	0.764107	0.721975	0.692231	0.671599	0.663788	0.608357	0.576964	0.567223	0.571562	0.5828	0.554748	0.581997	0.576291	0.608249	0.609746	0.612913
0.793558	0.815996	0.782504	0.728624	0.695168	0.718558	0.758565	0.811237	0.845717	0.830783	0.804502	0.823499	0.82328	0.873755	0.835286	0.8903	0.892789	0.878734	0.802672	0.736567	0.729905	0.724817	0.686201	0.663763	0.661018	0.681881	0.691398	0.674231	0.624085	0.542606	0.54429	0.540739	0.549195	0.520864	0.495534	0.51563	0.490007	0.491288	0.454466	0.466618	0.491764	0.526537	0.537408	0.527818	0.510615	0.5041	0.506369	0.528404	0.54989	0.572291
AVB::Chrimson, WT
Time relative to stim onset (s)
-10	-9.5	-9	-8.5	-8	-7.5	-7	-6.5	-6	-5.5	-5	-4.5	-4	-3.5	-3	-2.5	-2	-1.5	-1	-0.5	0	0.5	1	1.5	2	2.5	3	3.5	4	4.5	5	5.5	6	6.5	7	7.5	8	8.5	9	9.5	10	10.5	11	11.5	12	12.5	13	13.5	14	14.5
Calcium activity in AIY (dR/R0)
0.0331602	0.0356017	0.0331602	0.0411062	0.0439029	0.0474542	0.0369778	0.0369335	0.0408843	0.0301416	0.0244151	0.0268567	0.0423936	0.0507391	0.0462556	0.0274781	0.0226395	0.0284991	0.0353798	0.0280996	0.0365339	0.0336041	0.0508723	0.0491854	0.0614818	0.062192	0.0698273	0.0676965	0.0802592	0.0799485	0.0965952	0.0772406	0.0948639	0.0939317	0.105207	0.0866072	0.101212	0.111466	0.123363	0.12283	0.136325	0.134994	0.124473	0.114884	0.116838	0.121144	0.123496	0.111999	0.107427	0.108758
0.0818093	0.0891699	0.101427	0.0970817	0.0809663	0.0620947	0.0488327	0.0472114	0.0485084	0.0667315	0.0602464	0.069131	0.0514916	0.0532101	0.0435473	0.0402075	0.0443904	0.0395266	0.0314202	0.026751	0.0257458	0.0253891	0.0225357	0.0108301	0	0.00460441	0.0135538	0.0365435	0.0381647	0.042607	0.0468223	0.0636835	0.0764916	0.0910182	0.102108	0.146822	0.19251	0.245785	0.29144	0.321563	0.344617	0.382328	0.416634	0.447276	0.470785	0.467218	0.505512	0.512322	0.543547	0.546725
0.186714	0.158528	0.143537	0.122458	0.104673	0.0918735	0.0885443	0.0831623	0.0748823	0.0598058	0.0509393	0.0539925	0.050232	0.0523365	0.0469718	0.0550103	0.0553725	0.0524745	0.0519225	0.0509565	0.0491453	0.0461265	0.0535613	0.0868538	0.130686	0.190457	0.254472	0.325559	0.393507	0.48281	0.553535	0.658916	0.713874	0.793362	0.763778	0.785962	0.785289	0.817702	0.808094	0.747098	0.711977	0.676735	0.665229	0.622777	0.568215	0.534923	0.504908	0.482379	0.451691	0.426524
0.0710703	0.0845208	0.103787	0.122031	0.118258	0.126027	0.116971	0.121232	0.110934	0.115861	0.122964	0.125583	0.135704	0.14476	0.164691	0.176677	0.177165	0.205132	0.20926	0.205309	0.210547	0.234962	0.298264	0.343676	0.417233	0.512052	0.641497	0.772318	0.852976	0.911617	0.944555	0.990101	1	0.987437	0.956763	0.922449	0.88698	0.851556	0.820349	0.807254	0.779864	0.73059	0.683402	0.659031	0.650286	0.631287	0.598082	0.582368	0.541972	0.5556
0.184123	0.191631	0.122215	0.0995692	0.0976	0.140185	0.151877	0.153231	0.164308	0.163077	0.154215	0.111631	0.144492	0.189785	0.238277	0.233231	0.183754	0.156431	0.1648	0.216123	0.256615	0.279138	0.278646	0.313969	0.341785	0.387815	0.431138	0.487385	0.538954	0.590769	0.601477	0.616985	0.582031	0.623262	0.626092	0.695877	0.712123	0.8176	0.769108	0.731569	0.622523	0.625846	0.601969	0.664492	0.663015	0.709662	0.673354	0.713108	0.737354	0.741169
0.15995	0.145053	0.137651	0.13279	0.142293	0.177607	0.202948	0.203168	0.201725	0.170519	0.160985	0.148565	0.155277	0.153113	0.141069	0.134828	0.123883	0.122879	0.144018	0.190027	0.221264	0.239203	0.275082	0.33925	0.422895	0.472291	0.512153	0.569704	0.635973	0.692395	0.718676	0.744645	0.756218	0.73119	0.722597	0.682829	0.686561	0.604924	0.536051	0.405363	0.322534	0.242936	0.200345	0.170174	0.141948	0.115666	0.088976	0.0779991	0.0666458	0.0558256
0.163803	0.181427	0.181294	0.19612	0.18924	0.17934	0.170507	0.171927	0.185466	0.180184	0.172371	0.160163	0.177476	0.183469	0.181338	0.178941	0.171483	0.192968	0.187641	0.237937	0.307498	0.437253	0.5556	0.687708	0.800906	0.87859	0.890132	0.885826	0.887246	0.875749	0.860345	0.807786	0.79145	0.7503	0.745905	0.68247	0.65841	0.619923	0.612953	0.590891	0.575265	0.592711	0.564212	0.584055	0.552359	0.538287	0.502064	0.488747	0.468726	0.488303
0.0677408	0.0571665	0.0617033	0.0621	0.0724673	0.0801435	0.120974	0.188405	0.26615	0.312484	0.327302	0.311328	0.293095	0.276414	0.26879	0.281848	0.302807	0.339256	0.364355	0.394387	0.411827	0.445826	0.484932	0.567456	0.622622	0.683911	0.713667	0.765107	0.817374	0.841455	0.85836	0.860965	0.891325	0.922133	0.937641	0.921254	0.875645	0.849804	0.827017	0.825154	0.783305	0.711425	0.616912	0.52766	0.465129	0.401856	0.345035	0.296821	0.262286	0.227562
0.334241	0.304507	0.270169	0.234728	0.235182	0.217704	0.202983	0.194812	0.179604	0.179896	0.164332	0.18596	0.180966	0.175908	0.151816	0.141505	0.13168	0.118353	0.113003	0.12701	0.158982	0.207458	0.262646	0.330188	0.426102	0.557782	0.691407	0.771239	0.815791	0.828794	0.875162	0.860636	0.870687	0.874935	0.904994	0.942348	0.97046	1	0.973184	0.953859	0.941375	0.900324	0.8869	0.829507	0.79465	0.72808	0.669812	0.65308	0.610798	0.598411
0.377302	0.361122	0.364137	0.320201	0.270525	0.230739	0.206453	0.214364	0.226654	0.225908	0.219131	0.197957	0.180999	0.15856	0.140208	0.143288	0.143288	0.132263	0.124643	0.116115	0.140953	0.164916	0.21751	0.275551	0.377302	0.468742	0.545979	0.58035	0.637419	0.691505	0.754021	0.756518	0.762808	0.765402	0.819747	0.863003	0.926946	0.959014	0.990953	0.9857	0.928048	0.880545	0.807101	0.777724	0.702983	0.676492	0.613651	0.598152	0.576816	0.578859
0.301638	0.298797	0.290407	0.302304	0.300661	0.305367	0.297598	0.282994	0.289519	0.281396	0.306255	0.293825	0.303902	0.280952	0.270076	0.252897	0.248813	0.248768	0.269676	0.279087	0.314201	0.338838	0.373862	0.384694	0.393395	0.415679	0.461535	0.483065	0.480801	0.451769	0.437653	0.429573	0.414702	0.403294	0.376482	0.363209	0.35291	0.345363	0.351844	0.357305	0.381542	0.373063	0.367515	0.353709	0.348959	0.335908	0.310605	0.306832	0.324544	0.351534
0.273326	0.261872	0.259992	0.274241	0.2686	0.264546	0.264857	0.289662	0.313967	0.318452	0.313381	0.319453	0.339808	0.358352	0.365873	0.369202	0.378931	0.38107	0.388677	0.390937	0.390937	0.408842	0.436063	0.491677	0.534974	0.604647	0.646806	0.705232	0.732435	0.767297	0.795967	0.833744	0.876059	0.877421	0.858533	0.828017	0.80918	0.790775	0.735057	0.689017	0.621017	0.586207	0.544514	0.521502	0.49285	0.466992	0.444067	0.437184	0.427921	0.416139
0.312553	0.320816	0.320298	0.323041	0.320367	0.305877	0.305532	0.312794	0.310448	0.296183	0.282469	0.276932	0.283418	0.279847	0.282624	0.285729	0.288317	0.278156	0.26258	0.239171	0.211157	0.19646	0.198979	0.231409	0.263097	0.309379	0.356713	0.40277	0.448052	0.483397	0.528989	0.573735	0.627383	0.657881	0.686084	0.725518	0.759656	0.758465	0.727381	0.699867	0.67451	0.626382	0.558969	0.482793	0.428835	0.377033	0.334253	0.275621	0.229218	0.187991
0.444002	0.349475	0.267148	0.216654	0.174941	0.154116	0.150008	0.133825	0.126956	0.110428	0.105128	0.093555	0.101176	0.0905441	0.100862	0.0993571	0.124353	0.119994	0.125294	0.127427	0.147844	0.183252	0.208342	0.263635	0.319962	0.431394	0.555308	0.699733	0.809472	0.888756	0.934891	0.963745	0.981621	0.974	1	0.985354	0.945178	0.915446	0.923883	0.964466	0.952266	0.921311	0.916324	0.875678	0.859558	0.833903	0.859621	0.891955	0.895907	0.900392
0.388884	0.405237	0.434545	0.445223	0.449432	0.46475	0.474479	0.480102	0.432734	0.388108	0.337997	0.29984	0.280002	0.2558	0.233738	0.206207	0.186869	0.17269	0.158269	0.139915	0.127978	0.118697	0.138138	0.168032	0.216453	0.261855	0.331407	0.394784	0.467406	0.530765	0.602025	0.668489	0.708164	0.754429	0.778475	0.814148	0.807248	0.791033	0.760363	0.720774	0.67708	0.631609	0.599696	0.573045	0.561677	0.52942	0.495851	0.446706	0.422987	0.417916
0.594844	0.583268	0.535863	0.508171	0.442121	0.396855	0.348638	0.309922	0.277399	0.273573	0.271498	0.26537	0.247017	0.239786	0.236446	0.226783	0.213586	0.175324	0.144163	0.106096	0.0978599	0.0734112	0.0776913	0.109987	0.158236	0.193547	0.232069	0.301848	0.403145	0.494455	0.564202	0.647082	0.689527	0.760279	0.792088	0.882685	0.919617	0.988294	0.992899	0.991505	0.901978	0.815045	0.737387	0.670136	0.670947	0.632425	0.636997	0.615435	0.642348	0.662322
0.38022	0.388003	0.407782	0.387322	0.392445	0.396887	0.403275	0.405901	0.397568	0.404475	0.411479	0.397049	0.400324	0.409695	0.40749	0.399287	0.391569	0.414981	0.411511	0.421822	0.435409	0.485571	0.494942	0.53048	0.533885	0.576297	0.593093	0.629021	0.625162	0.663489	0.65869	0.654767	0.599578	0.57928	0.603696	0.611543	0.634728	0.650486	0.660246	0.636706	0.598217	0.585311	0.574611	0.580642	0.54987	0.535895	0.490856	0.486446	0.456777	0.45642
0.471029	0.469614	0.471339	0.511463	0.541133	0.553397	0.544031	0.530662	0.502613	0.452502	0.400838	0.3386	0.290145	0.236774	0.200997	0.164272	0.150955	0.136586	0.125425	0.107485	0.105294	0.124752	0.159114	0.209967	0.270463	0.352952	0.430871	0.503855	0.569854	0.661348	0.709441	0.743337	0.745528	0.791948	0.807731	0.826103	0.801625	0.775871	0.7304	0.699229	0.662831	0.597005	0.535595	0.473789	0.44179	0.406151	0.380621	0.357524	0.331856	0.311932
0.460603	0.459182	0.43601	0.442802	0.430461	0.45208	0.446176	0.457318	0.437431	0.440804	0.444001	0.473343	0.490079	0.499711	0.500644	0.526834	0.531851	0.536822	0.495095	0.494606	0.501265	0.554623	0.57016	0.565987	0.539885	0.551782	0.543304	0.525148	0.488037	0.494118	0.489191	0.468194	0.449017	0.446753	0.435344	0.402806	0.377636	0.365916	0.377991	0.399032	0.402406	0.399521	0.373685	0.376482	0.361611	0.366183	0.384916	0.392773	0.400053	0.388245
0.460282	0.467199	0.475134	0.483345	0.497283	0.501682	0.515965	0.499181	0.494092	0.473616	0.460541	0.438633	0.419089	0.405875	0.392403	0.389488	0.393214	0.394163	0.383571	0.393145	0.419261	0.45647	0.512118	0.5451	0.596471	0.618827	0.656087	0.675527	0.701885	0.711097	0.756275	0.773076	0.801228	0.799589	0.791534	0.776095	0.716703	0.665402	0.590933	0.549275	0.515378	0.502579	0.475393	0.458367	0.443618	0.442549	0.445309	0.451691	0.458833	0.452036
0.491051	0.479475	0.471952	0.464105	0.457717	0.47915	0.488359	0.532425	0.557847	0.580091	0.571822	0.562873	0.589235	0.591375	0.593969	0.585246	0.606258	0.633301	0.610182	0.566148	0.516278	0.499773	0.509565	0.49893	0.490143	0.507523	0.535927	0.567834	0.580837	0.566472	0.588846	0.595493	0.586187	0.543807	0.510863	0.516505	0.53142	0.535798	0.556939	0.538489	0.54465	0.532717	0.548119	0.554864	0.573314	0.587224	0.590499	0.566699	0.541537	0.536965
0.49906	0.548703	0.595947	0.597244	0.591148	0.565986	0.612289	0.60522	0.573573	0.515629	0.487743	0.484306	0.461706	0.464008	0.451102	0.453178	0.472633	0.463911	0.431971	0.365013	0.332393	0.328956	0.316926	0.349319	0.384209	0.456291	0.547827	0.620558	0.708885	0.714624	0.741278	0.717088	0.686738	0.631323	0.589202	0.576265	0.551946	0.539721	0.515564	0.543061	0.548671	0.53489	0.495266	0.499416	0.497568	0.518807	0.478048	0.503567	0.486316	0.502626
0.573538	0.536738	0.537477	0.5392	0.562338	0.513846	0.531446	0.527631	0.514831	0.482215	0.488492	0.504985	0.565785	0.573046	0.601846	0.587446	0.579692	0.553723	0.521846	0.587446	0.593969	0.613785	0.590523	0.615877	0.635815	0.627569	0.610708	0.592738	0.605169	0.554708	0.553477	0.489477	0.491323	0.489231	0.540308	0.590277	0.604062	0.6096	0.594462	0.617231	0.575631	0.633108	0.594462	0.6896	0.685662	0.739938	0.662892	0.608862	0.537108	0.495015
0.547743	0.592134	0.598437	0.610956	0.577662	0.595286	0.572868	0.57167	0.565455	0.582679	0.604164	0.614108	0.623208	0.609136	0.605895	0.592844	0.573223	0.549829	0.542815	0.531318	0.524437	0.53043	0.55813	0.557864	0.524926	0.526302	0.529676	0.530652	0.494695	0.488392	0.500155	0.496604	0.484485	0.463	0.447729	0.444311	0.432326	0.431083	0.422027	0.420296	0.410174	0.397567	0.394149	0.399609	0.424202	0.444444	0.483509	0.504017	0.529054	0.553647
0.63047	0.60563	0.586776	0.572821	0.592589	0.595763	0.598334	0.594366	0.610685	0.620207	0.629435	0.634869	0.646099	0.640148	0.622035	0.587656	0.555485	0.518173	0.468458	0.439685	0.413621	0.413793	0.421073	0.449742	0.509237	0.55583	0.600593	0.646685	0.689155	0.724379	0.761967	0.789826	0.831623	0.823636	0.834814	0.82424	0.821307	0.795122	0.776354	0.751824	0.725052	0.694951	0.670973	0.632713	0.618137	0.588087	0.582084	0.546118	0.535871	0.51719
0.710892	0.729354	0.717785	0.657477	0.701538	0.694031	0.714462	0.665231	0.677662	0.635938	0.572185	0.554708	0.593477	0.6352	0.642708	0.650708	0.622769	0.5808	0.522462	0.512615	0.5152	0.5808	0.602708	0.657723	0.6416	0.680123	0.677169	0.673477	0.633723	0.595077	0.593969	0.619938	0.703631	0.741415	0.739077	0.737231	0.697846	0.690092	0.651815	0.676308	0.632123	0.630892	0.592615	0.603938	0.536862	0.507938	0.533169	0.527631	0.534892	0.502277
0.763619	0.761894	0.763274	0.780336	0.751513	0.74844	0.714035	0.703654	0.673671	0.671256	0.669312	0.681982	0.687878	0.681982	0.675678	0.674706	0.682923	0.702054	0.731943	0.770864	0.804328	0.822268	0.819978	0.840677	0.84466	0.839141	0.763964	0.709832	0.672322	0.654508	0.639674	0.647577	0.647671	0.647483	0.613737	0.618818	0.632366	0.653191	0.65799	0.660499	0.670723	0.702086	0.738968	0.796738	0.839925	0.884491	0.869876	0.84466	0.821295	0.86053
0.900933	0.923272	0.941367	0.916355	0.913853	0.888427	0.887064	0.830881	0.779079	0.738576	0.721844	0.704162	0.672681	0.658898	0.634835	0.611426	0.611064	0.60739	0.622397	0.612185	0.633903	0.668938	0.698729	0.740491	0.771437	0.820979	0.846406	0.88841	0.917407	0.955823	0.973918	0.988339	0.984492	1	0.977075	0.956478	0.910455	0.909041	0.890273	0.862914	0.804488	0.757361	0.740888	0.754584	0.762761	0.756171	0.730831	0.751496	0.751134	0.751117
0.840507	0.787675	0.74665	0.715912	0.689284	0.658521	0.60006	0.561899	0.524361	0.518258	0.497484	0.446844	0.360185	0.327579	0.293155	0.280277	0.256638	0.249116	0.243088	0.254098	0.275519	0.321651	0.308698	0.311388	0.331241	0.373113	0.422732	0.480147	0.502242	0.518333	0.506451	0.558163	0.616475	0.705973	0.755119	0.765307	0.733	0.689957	0.677029	0.640686	0.602501	0.55069	0.510337	0.487421	0.451054	0.419917	0.392243	0.370722	0.36838	0.35204
0.576373	0.566123	0.57073	0.578424	0.590443	0.577323	0.562743	0.544869	0.537126	0.528015	0.522513	0.511655	0.503115	0.494303	0.498095	0.505844	0.523034	0.543616	0.551104	0.537625	0.531396	0.525894	0.522893	0.50452	0.496701	0.502404	0.510125	0.511379	0.525205	0.535124	0.565738	0.573644	0.599695	0.604313	0.637434	0.644895	0.637076	0.628806	0.637874	0.657565	0.669731	0.687746	0.708018	0.717047	0.710644	0.702461	0.677615	0.655872	0.624276	0.611274
0.749373	0.761694	0.774777	0.7733	0.747325	0.717078	0.66627	0.640866	0.604712	0.608364	0.563367	0.562621	0.544378	0.575815	0.589502	0.628926	0.666349	0.714792	0.742276	0.75104	0.704535	0.649519	0.590835	0.553079	0.537487	0.509733	0.495681	0.475755	0.468118	0.486758	0.519815	0.574323	0.617938	0.684958	0.704884	0.736893	0.736957	0.759677	0.761297	0.803531	0.826077	0.84575	0.844654	0.888778	0.963529	0.996094	1	0.968737	0.943936	0.923613
0.85528	0.882117	0.932186	0.919426	0.888607	0.8634	0.843146	0.826279	0.775207	0.737491	0.700213	0.700088	0.678361	0.627289	0.547624	0.478712	0.509844	0.531979	0.567438	0.568598	0.601392	0.639798	0.680963	0.721376	0.758747	0.773545	0.786274	0.837158	0.827721	0.815808	0.761851	0.763262	0.758465	0.751975	0.72216	0.663343	0.638105	0.67162	0.716297	0.696106	0.641115	0.608916	0.557343	0.536023	0.464604	0.432217	0.35205	0.266648	0.215388	0.166855
0.756529	0.600589	0.573008	0.580256	0.727004	0.717534	0.70456	0.696723	0.700227	0.685899	0.656891	0.648027	0.639839	0.639082	0.635801	0.646227	0.636104	0.648704	0.649062	0.677886	0.679702	0.685524	0.668862	0.65314	0.64512	0.656868	0.677743	0.689523	0.686998	0.686345	0.661487	0.635028	0.601521	0.595381	0.590562	0.589359	0.592856	0.605639	0.616009	0.613126	0.618717	0.623504	0.626626	0.607909	0.595142	0.585911	0.619458	0.639513	0.669268	0.666003
0.985751	0.974633	0.976855	0.967122	0.947664	0.92244	0.925523	0.920481	0.909896	0.898857	0.891474	0.903556	0.901143	0.889084	0.831205	0.745052	0.659153	0.616909	0.595484	0.54827	0.467843	0.403138	0.35856	0.345697	0.344032	0.329027	0.320816	0.299048	0.272478	0.259337	0.22892	0.210035	0.188204	0.198288	0.221855	0.21358	0.193222	0.165473	0.166979	0.153033	0.171734	0.151344	0.14197	0.114205	0.14408	0.175684	0.216359	0.222564	0.209629	0.191773
[truncated: 34 more columns]

## Sheet: Fig 4S2
eat-4 mutant
Time relative to onset of a forward run (s)
-20	-19.5	-19	-18.5	-18	-17.5	-17	-16.5	-16	-15.5	-15	-14.5	-14	-13.5	-13	-12.5	-12	-11.5	-11	-10.5	-10	-9.5	-9	-8.5	-8	-7.5	-7	-6.5	-6	-5.5	-5	-4.5	-4	-3.5	-3	-2.5	-2	-1.5	-1	-0.5	0	0.5	1	1.5	2	2.5	3	3.5	4	4.5
Calcium activity in AIY (dR/R0)
0.125514	0.123935	0.123307	0.127474	0.132183	0.137838	0.1416	0.144011	0.14972	0.156951	0.163164	0.169704	0.178689	0.185289	0.188061	0.191798	0.196166	0.1962	0.194583	0.194429	0.19391	0.191093	0.188978	0.188083	0.186565	0.184567	0.182507	0.180433	0.180834	0.181692	0.187056	0.192414	0.197758	0.207712	0.221838	0.226958	0.229006	0.240707	0.253077	0.26998	0.289703	0.314808	0.343235	0.374216	0.411812	0.451225	0.524516	0.597457	0.669181	0.738133
0.151002	0.111528	0.0777283	0.0561533	0.0392954	0.0264915	0.0228023	0.0223457	0.0219176	0.0216535	0.0228729	0.0235166	0.0230288	0.023107	0.0236715	0.0276726	0.0334645	0.0390293	0.0446357	0.0506642	0.0547205	0.0552496	0.0529566	0.0456114	0.0387194	0.0323225	0.0319233	0.0341288	0.0394773	0.0453426	0.05615	0.0662493	0.0745097	0.0848444	0.0972703	0.105279	0.111725	0.124309	0.138607	0.161114	0.188233	0.226224	0.263707	0.300479	0.332275	0.361498	0.386872	0.411466	0.433753	0.456088
0.344841	0.351502	0.357201	0.358935	0.359105	0.355419	0.351211	0.342627	0.332142	0.316674	0.303487	0.292603	0.278872	0.263386	0.269362	0.280065	0.304824	0.329608	0.354448	0.376446	0.392317	0.394396	0.385541	0.370497	0.353689	0.339867	0.326562	0.31489	0.304842	0.29671	0.287071	0.276782	0.259917	0.244199	0.239289	0.234972	0.231626	0.236163	0.249275	0.274163	0.303652	0.361604	0.424133	0.499195	0.571643	0.640149	0.689764	0.721841	0.749092	0.774634
0.315933	0.325808	0.336456	0.338676	0.337826	0.326316	0.31299	0.294274	0.282824	0.280908	0.281593	0.283542	0.29822	0.31383	0.327719	0.343161	0.361211	0.361649	0.350939	0.33681	0.321989	0.305359	0.287927	0.262699	0.238836	0.218261	0.201468	0.188269	0.189641	0.195777	0.217958	0.242792	0.276895	0.312815	0.351537	0.369886	0.375329	0.371299	0.368088	0.39597	0.430464	0.489362	0.552876	0.622415	0.665891	0.696737	0.725025	0.752745	0.781022	0.808696
0.0866697	0.0900036	0.0892981	0.085479	0.0777892	0.068819	0.0592085	0.0480372	0.0374684	0.0324658	0.0318223	0.0393964	0.053152	0.0712639	0.0901358	0.108607	0.115219	0.121098	0.124955	0.134633	0.15046	0.161621	0.171024	0.187607	0.202555	0.20729	0.211419	0.214033	0.208582	0.195834	0.187106	0.179606	0.186877	0.19435	0.207302	0.220647	0.229235	0.248197	0.290621	0.351002	0.426254	0.505933	0.587834	0.642529	0.693752	0.710921	0.730332	0.758926	0.786894	0.814085
0.01981	0.0306917	0.0391479	0.0551572	0.0721939	0.0860686	0.101465	0.121783	0.139282	0.153671	0.163992	0.172536	0.187369	0.20148	0.21013	0.222829	0.245186	0.261952	0.273889	0.31352	0.36207	0.416602	0.470939	0.524474	0.558428	0.569041	0.545752	0.497551	0.452399	0.409081	0.385041	0.366666	0.363182	0.360718	0.360687	0.362804	0.366934	0.381566	0.399957	0.406205	0.410155	0.406947	0.405574	0.410115	0.42396	0.44886	0.477578	0.502544	0.517329	0.533311
0.0482258	0.0561325	0.0652418	0.0754622	0.0883634	0.0984263	0.104478	0.106342	0.10579	0.0960111	0.0863474	0.0820528	0.0818928	0.0845517	0.0898823	0.0958201	0.101388	0.107317	0.115086	0.123725	0.133594	0.136301	0.134884	0.126052	0.11596	0.103937	0.0935767	0.0895032	0.0865352	0.0848903	0.0848343	0.0854311	0.089285	0.0941169	0.100885	0.108186	0.116764	0.133851	0.163972	0.207006	0.255714	0.312819	0.370226	0.42279	0.468889	0.499568	0.531227	0.56324	0.579321	0.586987
0.0573783	0.0603669	0.0622579	0.0628226	0.0633281	0.0638049	0.067044	0.0712213	0.0818335	0.0940104	0.110827	0.125938	0.138173	0.147504	0.154843	0.155538	0.154643	0.152701	0.151292	0.151454	0.149287	0.144042	0.137299	0.129758	0.122956	0.117695	0.121907	0.127474	0.135529	0.142286	0.147992	0.149547	0.146084	0.145997	0.147563	0.155484	0.164528	0.188844	0.215265	0.247893	0.274618	0.294742	0.317892	0.34236	0.359328	0.378972	0.408529	0.435973	0.460847	0.473628
0.062205	0.062658	0.0632932	0.0696157	0.0773885	0.090897	0.108018	0.134604	0.163948	0.195871	0.225484	0.253781	0.26092	0.263158	0.249129	0.23277	0.211392	0.189183	0.1659	0.149694	0.137176	0.129928	0.123424	0.122271	0.120057	0.113567	0.107972	0.10353	0.0984087	0.092932	0.088134	0.0835537	0.0774308	0.0726807	0.0729053	0.0704322	0.064746	0.0714623	0.0846709	0.110235	0.139358	0.190035	0.237393	0.275174	0.305552	0.32711	0.349574	0.372469	0.389365	0.405649
0.0888723	0.0918618	0.110379	0.130258	0.15147	0.180388	0.213949	0.241202	0.26653	0.281053	0.292988	0.299039	0.300463	0.296109	0.294774	0.294964	0.293552	0.293273	0.30222	0.309648	0.314416	0.319557	0.325094	0.318283	0.30625	0.284067	0.259188	0.224873	0.191589	0.160887	0.138361	0.123882	0.115938	0.11048	0.111688	0.115227	0.13467	0.163604	0.21642	0.272656	0.332	0.389824	0.446814	0.464127	0.476034	0.482245	0.486902	0.483717	0.486461	0.499502
0	0	0	0	0	0	0	0	0	0	0	0	0	0	0	0	0	0	0	0	0	0	0	0	0	0	0	0	NaN	NaN	0.320758	0.317904	0.31882	0.317463	0.309015	0.301219	0.294124	0.288192	0.28332	0.295117	0.316144	0.369009	0.42883	0.512497	0.602363	0.704072	0.802287	0.897796	0.949115	0.989647
0.645808	0.639733	0.641893	0.653852	0.67366	0.697865	0.723349	0.726022	0.730842	0.742977	0.751987	0.752768	0.759697	0.772417	0.767472	0.756782	0.731853	0.705539	0.675053	0.636173	0.579052	0.508817	0.428075	0.331977	0.232443	0.168421	0.108213	0.0725315	0.0436908	0.0272574	0.0140561	0.00305656	-0.00378345	-0.00922149	-0.00668011	-0.00434029	-0.00294542	0.00430311	0.01981	0.0306917	0.0391479	0.0551572	0.0721939	0.0860686	0.101465	0.121783	0.139282	0.153671	0.163992	0.172536
0.538851	0.482533	0.423263	0.361505	0.306803	0.255691	0.237549	0.2238	0.21791	0.214683	0.219733	0.225792	0.233018	0.235068	0.234719	0.232649	0.229245	0.220432	0.209749	0.203056	0.198233	0.200452	0.201672	0.201533	0.205897	0.212765	0.203343	0.191367	0.183949	0.175248	0.160139	0.149698	0.155411	0.161211	0.167167	0.180718	0.199671	0.215586	0.230854	0.266282	0.302659	0.33766	0.37168	0.402961	0.428229	0.447553	0.465253	0.482334	0.508616	0.534523
0.210848	0.203445	0.195986	0.188369	0.180893	0.17971	0.183494	0.202238	0.221523	0.241375	0.266807	0.294537	0.302445	0.308829	0.314935	0.316925	0.3088	0.300809	0.292947	0.287395	0.2827	0.296571	0.313144	0.32169	0.331944	0.346035	0.344904	0.337602	0.336052	0.334502	0.328241	0.322244	0.318036	0.313859	0.309745	0.302366	0.292302	0.282928	0.278591	0.282129	0.286833	0.29507	0.32434	0.358229	0.368091	0.383671	0.40821	0.416287	0.413804	0.416754
0.0317547	0.0462298	0.0615566	0.075495	0.0820449	0.0915226	0.102495	0.112405	0.122182	0.135935	0.148578	0.157323	0.168284	0.182265	0.186617	0.185629	0.181391	0.175305	0.156922	0.142474	0.13385	0.121777	0.107788	0.0956066	0.0837116	0.0778884	0.0739903	0.0798477	0.0922157	0.118254	0.156384	0.198521	0.240099	0.263024	0.276868	0.275043	0.267078	0.253949	0.257433	0.268772	0.290047	0.330446	0.377419	0.441044	0.50162	0.553752	0.5765	0.591345	0.570488	0.538851
0.126453	0.113487	0.0991478	0.0790101	0.0626377	0.0512444	0.0459359	0.0438781	0.045831	0.0482585	0.0492222	0.049726	0.0482869	0.0483745	0.0504693	0.053708	0.0575563	0.0584747	0.0585288	0.0574899	0.0573783	0.0603669	0.0622579	0.0628226	0.0633281	0.0638049	0.067044	0.0712213	0.0818335	0.0940104	0.110827	0.125938	0.138173	0.147504	0.154843	0.155538	0.154643	0.152701	0.151292	0.151454	0.149287	0.144042	0.137299	0.129758	0.122956	0.117695	0.121907	0.127474	0.135529	0.142286
0.147463	0.142149	0.144801	0.149594	0.15871	0.169884	0.183559	0.188381	0.188841	0.179971	0.17004	0.166012	0.1637	0.16648	0.171061	0.17766	0.182291	0.186126	0.189374	0.192494	0.194031	0.196496	0.201447	0.20257	0.200037	0.200989	0.203214	0.206733	0.210843	0.224028	0.236642	0.247865	0.256439	0.262677	0.273564	0.285694	0.296616	0.306937	0.315933	0.325808	0.336456	0.338676	0.337826	0.326316	0.31299	0.294274	0.282824	0.280908	0.281593	0.283542
0.0205808	0.0154391	0.0109417	0.00914182	0.00967342	0.00564864	0.000311628	0.00221408	0.00458752	0.00458034	0.00675685	0.0128733	0.0168325	0.0193184	0.024378	0.0304574	0.0309225	0.0312211	0.031949	0.0326007	0.0331156	0.0345	0.0368479	0.0392127	0.0415847	0.0444561	0.0477621	0.0536151	0.0582722	0.0609446	0.0622621	0.062205	0.062658	0.0632932	0.0696157	0.0773885	0.090897	0.108018	0.134604	0.163948	0.195871	0.225484	0.253781	0.26092	0.263158	0.249129	0.23277	0.211392	0.189183	0.1659
0.00493941	-0.00485757	-0.00913858	-0.00964316	-0.0075676	-0.00571239	-0.00563311	-0.00565445	-0.00577078	-0.00496436	-0.00387941	-0.001607	0.000913184	0.00460629	0.00855245	0.0128881	0.0174629	0.0221887	0.0265643	0.0325697	0.0405569	0.0482258	0.0561325	0.0652418	0.0754622	0.0883634	0.0984263	0.104478	0.106342	0.10579	0.0960111	0.0863474	0.0820528	0.0818928	0.0845517	0.0898823	0.0958201	0.101388	0.107317	0.115086	0.123725	0.133594	0.136301	0.134884	0.126052	0.11596	0.103937	0.0935767	0.0895032	0.0865352
0.00632546	0.0215244	0.0377052	0.0521432	0.0680277	0.0870256	0.112547	0.143684	0.175111	0.206622	0.235146	0.260526	0.266083	0.270134	0.271482	0.27434	0.278214	0.291124	0.306129	0.322903	0.337302	0.344841	0.351502	0.357201	0.358935	0.359105	0.355419	0.351211	0.342627	0.332142	0.316674	0.303487	0.292603	0.278872	0.263386	0.269362	0.280065	0.304824	0.329608	0.354448	0.376446	0.392317	0.394396	0.385541	0.370497	0.353689	0.339867	0.326562	0.31489	0.304842
0.224028	0.236642	0.247865	0.256439	0.262677	0.273564	0.285694	0.296616	0.306937	0.315933	0.325808	0.336456	0.338676	0.337826	0.326316	0.31299	0.294274	0.282824	0.280908	0.281593	0.283542	0.29822	0.31383	0.327719	0.343161	0.361211	0.361649	0.350939	0.33681	0.321989	0.305359	0.287927	0.262699	0.238836	0.218261	0.201468	0.188269	0.189641	0.195777	0.217958	0.242792	0.276895	0.312815	0.351537	0.369886	0.375329	0.371299	0.368088	0.39597	0.430464
cat-1 mutant
Time relative to onset of a forward run (s)
-20	-19.5	-19	-18.5	-18	-17.5	-17	-16.5	-16	-15.5	-15	-14.5	-14	-13.5	-13	-12.5	-12	-11.5	-11	-10.5	-10	-9.5	-9	-8.5	-8	-7.5	-7	-6.5	-6	-5.5	-5	-4.5	-4	-3.5	-3	-2.5	-2	-1.5	-1	-0.5	0	0.5	1	1.5	2	2.5	3	3.5	4	4.5
Calcium activity in AIY (dR/R0)
0.292423	0.329587	0.365537	0.405092	0.450461	0.492796	0.53329	0.581536	0.632477	0.682492	0.734089	0.792855	0.830402	0.838935	0.823554	0.793738	0.72741	0.65562	0.603306	0.552698	0.506006	0.469653	0.442759	0.428368	0.417868	0.442304	0.469118	0.510913	0.545845	0.567682	0.559363	0.527656	0.479391	0.427194	0.380856	0.346481	0.345695	0.347913	0.354967	0.373718	0.400178	0.439539	0.480906	0.516239	0.548768	0.56876	0.57252	0.552216	0.555081	0.572028
0.269408	0.252135	0.232154	0.203284	0.174952	0.14789	0.131038	0.12374	0.127431	0.135081	0.153119	0.169273	0.175507	0.196387	0.239776	0.268402	0.287842	0.308075	0.324313	0.291212	0.263127	0.24594	0.225116	0.201153	0.195312	0.19929	0.206192	0.2139	0.225375	0.232982	0.231922	0.230489	0.228561	0.229758	0.232642	0.238389	0.24454	0.230006	0.21499	0.199975	0.183306	0.164505	0.154302	0.148596	0.149482	0.151311	0.154448	0.157575	0.160671	0.161641
0.143337	0.131662	0.11923	0.103131	0.0915415	0.0857164	0.0850851	0.0885212	0.0943658	0.100757	0.10578	0.107901	0.102568	0.0961738	0.0887171	0.0856626	0.0843268	0.0760619	0.0695856	0.0732717	0.074845	0.0732489	0.080363	0.0994564	0.116884	0.133005	0.14099	0.146699	0.135609	0.122165	0.105169	0.0869773	0.0664671	0.0550641	0.0508344	0.0501232	0.0502939	0.064603	0.0798875	0.0930965	0.104329	0.106482	0.105046	0.0951294	0.0839762	0.071678	0.0727515	0.0781035	0.0734332	0.0705095
0.2145	0.240018	0.253863	0.264155	0.255383	0.246628	0.237917	0.226182	0.211401	0.205294	0.20258	0.194104	0.185315	0.177561	0.169279	0.159746	0.147566	0.131716	0.121348	0.113823	0.0944176	0.0754541	0.0721802	0.066015	0.0546741	0.0414602	0.0262155	0.00794047	-0.00864984	-0.0102184	-0.00179829	0.0158569	0.0429626	0.0712361	0.0896318	0.117646	0.156174	0.1947	0.233226	0.278469	0.323714	0.33213	0.338372	0.339007	0.341643	0.3473	0.353207	0.359244	0.362115	0.36302
0.310468	0.32021	0.346154	0.380007	0.403933	0.414359	0.410932	0.401179	0.386284	0.368843	0.350854	0.336789	0.322756	0.308759	0.291882	0.277755	0.268118	0.257209	0.248243	0.256138	0.265645	0.276351	0.285058	0.286186	0.280668	0.271752	0.261979	0.248761	0.234947	0.220639	0.227084	0.234335	0.237105	0.260138	0.287649	0.308058	0.327279	0.343487	0.340533	0.342732	0.351702	0.379922	0.417539	0.467993	0.517815	0.555412	0.588302	0.613251	0.61295	0.607141
0.690065	0.703346	0.703505	0.704227	0.705251	0.680532	0.653039	0.628265	0.606262	0.593433	0.578628	0.561426	0.536584	0.508344	0.465149	0.420418	0.372861	0.331762	0.312044	0.293341	0.275776	0.26216	0.251259	0.23039	0.206333	0.196273	0.187185	0.179881	0.174829	0.172224	0.179401	0.189138	0.2065	0.23396	0.271879	0.329501	0.384508	0.435964	0.478553	0.517246	0.532476	0.543608	0.550831	0.547656	0.544268	0.547774	0.550156	0.550644	0.558319	0.573379
0.621941	0.590878	0.556568	0.530239	0.503612	0.474716	0.449896	0.438023	0.414793	0.379149	0.335216	0.288047	0.256528	0.22566	0.194214	0.1677	0.156978	0.147552	0.139539	0.135231	0.132376	0.134895	0.138447	0.138271	0.138251	0.142487	0.145522	0.14622	0.144697	0.141557	0.1622	0.188887	0.218933	0.250924	0.289073	0.316633	0.331713	0.345457	0.358611	0.360615	0.36196	0.365382	0.357532	0.332786	0.316146	0.304486	0.285819	0.266764	0.262776	0.256047
0.209184	0.198922	0.192243	0.190103	0.185727	0.172363	0.156341	0.136787	0.114482	0.089317	0.0607979	0.0307789	0.0164661	0.00672399	0.0137537	0.0205769	0.0267126	0.0274546	0.0216044	0.0127092	0.00151499	-0.0036713	-0.00745813	-0.0117265	-0.0165968	-0.0244065	-0.0310106	-0.0331067	-0.0332919	-0.0309543	-0.021646	-0.00891073	-0.00245227	0.00259552	0.00588846	0.0100008	0.0151985	0.0238694	0.034248	0.0466762	0.0593699	0.0734182	0.0849301	0.0888653	0.0915159	0.0928337	0.0894791	0.0844016	0.0785927	0.0749384
0	0	0	0	0	0	0	0	0	0	0	0	0	0	0	0	0	0	0	NaN	NaN	0.43746	0.407377	0.396051	0.394116	0.4045	0.420891	0.440198	0.435788	0.427563	0.407077	0.386058	0.363968	0.350701	0.344571	0.341392	0.339644	0.348273	0.357826	0.36537	0.378615	0.402288	0.421738	0.436083	0.448628	0.460301	0.457217	0.454244	0.459598	0.472476
0.444579	0.429585	0.428852	0.420648	0.410849	0.405085	0.397966	0.387217	0.377395	0.369002	0.360139	0.350977	0.335314	0.318558	0.304654	0.290239	0.273692	0.258747	0.245899	0.230735	0.21434	0.197128	0.181	0.174405	0.17002	0.174896	0.185021	0.202041	0.218291	0.234127	0.235261	0.232035	0.228911	0.224384	0.215168	0.212619	0.218217	0.216316	0.208751	0.203467	0.197868	0.176817	0.160356	0.156269	0.153048	0.150662	0.155446	0.164409	0.169188	0.170826
-0.0161482	-0.0258368	-0.0337556	-0.0290851	-0.021057	-0.00633998	0.00912407	0.0254843	0.0354165	0.041951	0.0450857	0.0472322	0.053724	0.0617738	0.0748521	0.0846371	0.090471	0.0954419	0.0997743	0.0968366	0.091749	0.0790197	0.0666364	0.0555121	0.049412	0.0533121	0.0652305	0.0830901	0.100084	0.11669	0.12808	0.135989	0.133769	0.133229	0.135496	0.131596	0.123494	0.118082	0.1132	0.111962	0.110531	0.10737	0.109019	0.118022	0.124984	0.130751	0.142347	0.155086	0.169395	0.183454
0.278493	0.342213	0.424763	0.537988	0.632094	0.708224	0.71164	0.684707	0.611847	0.531029	0.444322	0.365596	0.297321	0.245942	0.199401	0.162125	0.143605	0.136407	0.133734	0.13003	0.126027	0.118071	0.109453	0.0959205	0.0817129	0.0662818	0.0550416	0.0466422	0.0389488	0.032337	0.0327751	0.0343022	0.0379855	0.0390667	0.0380667	0.0442825	0.0523545	0.0683002	0.0876712	0.124262	0.162675	0.20327	0.24362	0.283275	0.320169	0.352147	0.373434	0.387595	0.392517	0.37692
0.30836	0.304989	0.303518	0.332402	0.367284	0.410648	0.453314	0.494604	0.546375	0.605854	0.650785	0.693468	0.753772	0.805799	0.838121	0.874044	0.915024	0.944227	0.966708	0.942801	0.912244	0.881021	0.846668	0.804851	0.783114	0.781897	0.752535	0.69871	0.651852	0.608673	0.54567	0.484961	0.471903	0.457627	0.440722	0.430011	0.426714	0.415809	0.399769	0.388942	0.379445	0.374848	0.370289	0.365831	0.35228	0.330071	0.313322	0.298527	0.282072	0.266864
0.237201	0.241724	0.252584	0.248152	0.234838	0.231076	0.228402	0.215891	0.203947	0.193506	0.175408	0.150029	0.127282	0.106063	0.0849231	0.0638085	0.0497051	0.0378663	0.0342419	0.0401286	0.0584395	0.0798865	0.103669	0.119263	0.132933	0.145101	0.154202	0.154268	0.159431	0.170257	0.173053	0.170348	0.164737	0.158543	0.153779	0.149302	0.145587	0.145368	0.150519	0.163253	0.180751	0.19553	0.210383	0.232012	0.249465	0.257698	0.265441	0.272538	0.276109	0.277815
0.356693	0.331591	0.313737	0.293742	0.272818	0.270756	0.272417	0.287411	0.300411	0.310123	0.303866	0.281473	0.252208	0.220231	0.18594	0.154241	0.137296	0.122308	0.112418	0.10701	0.106138	0.105788	0.105645	0.120678	0.138469	0.153991	0.16807	0.178729	0.176549	0.162345	0.153001	0.146418	0.146785	0.149882	0.169229	0.195946	0.238501	0.297792	0.37273	0.455191	0.540329	0.608024	0.675546	0.74398	0.791104	0.808559	0.803381	0.786408	0.722888	0.655685
0.205133	0.211001	0.214603	0.21566	0.216108	0.216309	0.223801	0.233163	0.251395	0.26639	0.271775	0.273402	0.271138	0.259843	0.24489	0.250741	0.258816	0.273882	0.284937	0.288632	0.286038	0.279127	0.297709	0.324767	0.359598	0.390673	0.417877	0.418605	0.402603	0.382846	0.367191	0.357866	0.359722	0.362266	0.353747	0.344009	0.330673	0.312196	0.287988	0.272493	0.263474	0.253553	0.244157	0.257338	0.270962	0.285889	0.293312	0.288154	0.286338	0.286815
0.35066	0.373968	0.400844	0.437061	0.469958	0.49975	0.514656	0.524793	0.536594	0.550175	0.570836	0.58787	0.597075	0.599714	0.596696	0.576839	0.551602	0.547545	0.54597	0.538655	0.535639	0.548361	0.560766	0.572764	0.589066	0.607416	0.615211	0.619999	0.606869	0.589478	0.55559	0.517736	0.468416	0.424525	0.386562	0.369872	0.362404	0.374053	0.38663	0.395068	0.399438	0.393208	0.379417	0.357368	0.334742	0.311726	0.304505	0.300485	0.29804	0.295964
0.106633	0.119185	0.117931	0.114091	0.105606	0.0971357	0.0886765	0.0899798	0.0936144	0.106009	0.114529	0.110687	0.104434	0.0955518	0.0915047	0.090692	0.0943763	0.0991919	0.114182	0.126278	0.129136	0.134582	0.144268	0.145425	0.140865	0.140153	0.140298	0.132912	0.125661	0.121297	0.117739	0.116067	0.118819	0.125338	0.133222	0.141539	0.140884	0.140722	0.142317	0.144992	0.14977	0.156408	0.164509	0.168233	0.170719	0.165885	0.160697	0.153331	0.148208	0.147087
0.378513	0.39526	0.411598	0.416915	0.415629	0.388589	0.356729	0.322863	0.287832	0.246945	0.213492	0.191867	0.170056	0.148122	0.139161	0.135601	0.140477	0.146163	0.151153	0.156157	0.161196	0.169703	0.182887	0.194367	0.204916	0.206697	0.205806	0.190679	0.175051	0.15837	0.142972	0.130216	0.120872	0.114355	0.109178	0.104447	0.114277	0.125649	0.141737	0.159273	0.179106	0.199271	0.219652	0.225102	0.227725	0.234565	0.236869	0.227902	0.229187	0.240441
0.0841814	0.083149	0.0968235	0.114272	0.138023	0.161214	0.183833	0.200526	0.214838	0.21706	0.220821	0.234589	0.254966	0.28634	0.329552	0.381498	0.410552	0.430463	0.423804	0.410044	0.372064	0.332177	0.288124	0.252783	0.225032	0.210739	0.200682	0.211628	0.224562	0.244734	0.264395	0.283335	0.294324	0.30075	0.306957	0.313069	0.320506	0.327251	0.332371	0.326233	0.31174	0.295095	0.278289	0.270638	0.267512	0.27635	0.286265	0.297833	0.310697	0.325254
0.100728	0.101796	0.0982315	0.0985921	0.101446	0.111036	0.123094	0.13885	0.155319	0.174043	0.204276	0.248495	0.311456	0.384445	0.439243	0.486369	0.493633	0.488461	0.441935	0.391052	0.334884	0.285762	0.240081	0.201749	0.165543	0.144936	0.127	0.117026	0.109468	0.104849	0.105028	0.108807	0.114117	0.119988	0.12499	0.129677	0.131473	0.133616	0.136605	0.138613	0.139221	0.141261	0.144072	0.153559	0.165294	0.187054	0.205133	0.211001	0.214603	0.21566
0.17168	0.168129	0.165821	0.163622	0.161493	0.153938	0.144328	0.14226	0.139767	0.134311	0.129604	0.126063	0.120136	0.111927	0.114897	0.121998	0.127885	0.134091	0.144964	0.150535	0.144306	0.137694	0.130745	0.129472	0.129888	0.126496	0.124092	0.125621	0.124547	0.118201	0.114617	0.113104	0.112804	0.11294	0.123827	0.136276	0.159021	0.181718	0.204328	0.219103	0.22845	0.225483	0.219263	0.227144	0.235118	0.234514	0.238694	0.251	0.24328	0.214851
0.293512	0.288704	0.292372	0.305957	0.329701	0.355409	0.382352	0.384266	0.380389	0.364978	0.350374	0.337616	0.326761	0.317774	0.303635	0.287429	0.254596	0.224241	0.207522	0.196889	0.194198	0.193133	0.192932	0.192828	0.191472	0.184917	0.191874	0.204812	0.222266	0.241048	0.264619	0.284596	0.299048	0.306968	0.310781	0.31868	0.327391	0.327601	0.328447	0.332507	0.336474	0.340319	0.346564	0.354076	0.352432	0.349476	0.338854	0.328137	0.317198	0.300552
0.29804	0.295964	0.294761	0.291091	0.283976	0.288538	0.299179	0.330619	0.363472	0.390328	0.41169	0.42395	0.413595	0.389212	0.375901	0.36419	0.34963	0.334933	0.312661	0.287095	0.252051	0.234667	0.235045	0.257588	0.288009	0.33653	0.379115	0.394508	0.401125	0.396501	0.386537	0.372481	0.363154	0.35571	0.363645	0.366537	0.356345	0.363552	0.388339	0.421982	0.461554	0.517438	0.574967	0.623198	0.670665	0.716495	0.748233	0.767821	0.791098	0.815548
0.281586	0.275997	0.269851	0.273686	0.275371	0.270339	0.264105	0.256574	0.248848	0.241023	0.243263	0.246847	0.251394	0.257368	0.267802	0.275083	0.278393	0.287907	0.301191	0.297187	0.290971	0.290885	0.289023	0.283043	0.284338	0.296427	0.292528	0.278929	0.268369	0.257486	0.236628	0.220854	0.217947	0.219817	0.226117	0.239694	0.255786	0.292423	0.329587	0.365537	0.405092	0.450461	0.492796	0.53329	0.581536	0.632477	0.682492	0.734089	0.792855	0.830402
0.288452	0.28103	0.26767	0.262332	0.266696	0.274195	0.283036	0.30434	0.326169	0.341837	0.360189	0.386145	0.417148	0.453619	0.476958	0.49414	0.481025	0.464077	0.422281	0.380925	0.340961	0.317993	0.30098	0.288315	0.275744	0.260367	0.244543	0.227679	0.211266	0.195235	0.183243	0.172518	0.155952	0.139412	0.128754	0.122121	0.123258	0.132007	0.147202	0.163303	0.179869	0.202295	0.227354	0.26886	0.315048	0.371111	0.413743	0.444963	0.465178	0.479755
0.174654	0.169116	0.160433	0.142421	0.126599	0.114313	0.101612	0.0886861	0.0964727	0.108794	0.135824	0.167892	0.207195	0.243945	0.278437	0.309888	0.340332	0.351492	0.356853	0.339992	0.309772	0.260439	0.219838	0.183923	0.165557	0.152416	0.146959	0.142438	0.144835	0.146366	0.143036	0.141237	0.141155	0.13313	0.119604	0.110865	0.103238	0.0992356	0.0966789	0.100728	0.101796	0.0982315	0.0985921	0.101446	0.111036	0.123094	0.13885	0.155319	0.174043	0.204276
0.31174	0.295095	0.278289	0.270638	0.267512	0.27635	0.286265	0.297833	0.310697	0.325254	0.339882	0.354545	0.365405	0.375815	0.385769	0.394455	0.399374	0.40019	0.396767	0.405886	0.419537	0.430073	0.440521	0.450951	0.444762	0.418731	0.38995	0.359964	0.342563	0.328487	0.32722	0.325529	0.322725	0.317018	0.30836	0.304989	0.303518	0.332402	0.367284	0.410648	0.453314	0.494604	0.546375	0.605854	0.650785	0.693468	0.753772	0.805799	0.838121	0.874044
0.217112	0.197717	0.179304	0.170333	0.164435	0.171041	0.178529	0.192323	0.22059	0.277666	0.336135	0.395723	0.459632	0.524661	0.557953	0.58831	0.608445	0.623179	0.630882	0.614837	0.587328	0.560164	0.531561	0.493432	0.462494	0.444631	0.421115	0.39342	0.369964	0.34756	0.312912	0.278723	0.24749	0.22189	0.204959	0.193811	0.184966	0.189977	0.19756	0.212805	0.238362	0.278493	0.342213	0.424763	0.537988	0.632094	0.708224	0.71164	0.684707	0.611847
0	0	0	0	0	0	0	NaN	-0.024309	-0.0272993	-0.0300041	-0.031851	-0.0315556	-0.0288287	-0.0250305	-0.0207934	-0.0217546	-0.0241597	-0.0130334	-0.00129554	0.0220617	0.0526284	0.102648	0.167427	0.246444	0.334402	0.425338	0.509934	0.577368	0.572085	0.547914	0.496562	0.426915	0.341082	0.284112	0.236743	0.205026	0.174412	0.151935	0.130595	0.111775	0.0977537	0.0879992	0.07715	0.065896	0.0590805	0.0528615	0.0514784	0.0535744	0.0634431
0	0	0	0	0	0	0	0	0	0	0	0	0	0	0	0	0	0	0	0	0	0	0	0	0	0	0	0	NaN	-0.024309	-0.0272993	-0.0300041	-0.031851	-0.0315556	-0.0288287	-0.0250305	-0.0207934	-0.0217546	-0.0241597	-0.0130334	-0.00129554	0.0220617	0.0526284	0.102648	0.167427	0.246444	0.334402	0.425338	0.509934	0.577368
0.111775	0.0977537	0.0879992	0.07715	0.065896	0.0590805	0.0528615	0.0514784	0.0535744	0.0634431	0.0744746	0.0866223	0.0920249	0.0919295	0.0831297	0.0794399	0.0797163	0.0729946	0.0740291	0.0853032	0.101356	0.119669	0.141702	0.157585	0.165334	0.168833	0.168865	0.170411	0.172459	0.174654	0.169116	0.160433	0.142421	0.126599	0.114313	0.101612	0.0886861	0.0964727	0.108794	0.135824	0.167892	0.207195	0.243945	0.278437	0.309888	0.340332	0.351492	0.356853	0.339992	0.309772
Time relative to onset of a reversal (s)
-20	-19.5	-19	-18.5	-18	-17.5	-17	-16.5	-16	-15.5	-15	-14.5	-14	-13.5	-13	-12.5	-12	-11.5	-11	-10.5	-10	-9.5	-9	-8.5	-8	-7.5	-7	-6.5	-6	-5.5	-5	-4.5	-4	-3.5	-3	-2.5	-2	-1.5	-1	-0.5	0	0.5	1	1.5	2	2.5	3	3.5	4	4.5
Calcium activity in AIY (dR/R0)
0.89115	0.845437	0.78291	0.723498	0.693291	0.66942	0.6557	0.628117	0.592145	0.565484	0.541467	0.531722	0.52709	0.548484	0.571088	0.596737	0.61133	0.615886	0.624118	0.63361	0.66243	0.695446	0.743548	0.803574	0.878506	0.946151	1.00978	1.10703	1.20913	1.22069	1.21792	1.1595	1.0824	0.980022	0.915584	0.872065	0.885515	0.905952	0.923158	0.933809	0.931984	0.920842	0.902486	0.874783	0.844518	0.825613	0.804624	0.760522	0.710802	0.650397
0.262883	0.246737	0.234066	0.231755	0.262688	0.308826	0.373033	0.433854	0.492201	0.551695	0.610416	0.642512	0.677249	0.728446	0.769585	0.792652	0.811666	0.827711	0.807095	0.778312	0.734213	0.697514	0.70571	0.73067	0.780966	0.838172	0.899309	0.926124	0.94725	0.946452	0.941119	0.919402	0.907448	0.908435	0.917227	0.930219	0.941738	0.95282	0.934594	0.922265	0.930601	0.936011	0.938123	0.953782	0.978854	0.985759	0.988966	0.997533	1.00229	0.99808
0.135215	0.135675	0.174276	0.215508	0.251142	0.281442	0.287252	0.283377	0.256626	0.226538	0.193362	0.196258	0.210696	0.198097	0.19021	0.205958	0.213175	0.202247	0.231422	0.292234	0.346875	0.39981	0.461496	0.524495	0.597691	0.658871	0.696953	0.725778	0.718345	0.706355	0.688634	0.692714	0.707915	0.763135	0.824676	0.837996	0.844318	0.829147	0.808842	0.782068	0.754127	0.725203	0.731179	0.748068	0.790689	0.837282	0.899475	0.921108	0.877729	0.808579
0.0813281	0.0673565	0.0510774	0.0322966	0.00978238	-0.0106563	-0.0125887	-0.00221542	0.0195351	0.0529283	0.0877604	0.110423	0.144936	0.1924	0.239864	0.287326	0.343064	0.398804	0.409173	0.416863	0.417645	0.420892	0.427861	0.435139	0.442576	0.446113	0.447228	0.430338	0.415665	0.405718	0.408025	0.414307	0.423825	0.426921	0.424069	0.43167	0.444902	0.456468	0.463377	0.465637	0.450151	0.435722	0.42303	0.414771	0.409242	0.399953	0.397282	0.403413	0.420853	0.443634
0.37885	0.365643	0.377272	0.391275	0.407045	0.419869	0.42153	0.413403	0.40027	0.385876	0.366407	0.34606	0.324985	0.334478	0.345158	0.349238	0.383163	0.423686	0.453747	0.482058	0.505931	0.501579	0.504819	0.518031	0.559597	0.615003	0.689319	0.762702	0.818081	0.866525	0.903273	0.90283	0.894273	0.869025	0.842396	0.77553	0.710334	0.648204	0.593981	0.547863	0.506519	0.469356	0.447536	0.430754	0.396024	0.362478	0.335216	0.303883	0.267636	0.244713
0.535988	0.504131	0.473915	0.445538	0.42354	0.405929	0.372213	0.333348	0.317095	0.302412	0.290612	0.282451	0.278242	0.289837	0.305568	0.333617	0.37798	0.439242	0.532336	0.621203	0.704335	0.773141	0.835652	0.860257	0.878242	0.889911	0.884782	0.879308	0.884972	0.888821	0.88961	0.902009	0.926339	0.940354	0.950208	0.967431	0.979782	0.965823	0.951682	0.937234	0.909375	0.872552	0.832023	0.789998	0.742122	0.69455	0.654512	0.616748	0.583963	0.556612
0.876068	0.847745	0.805404	0.758638	0.72275	0.686455	0.647069	0.613237	0.597054	0.565389	0.516804	0.456921	0.392627	0.349664	0.307589	0.264726	0.228586	0.213972	0.201122	0.1902	0.184329	0.180437	0.183871	0.188712	0.188472	0.188445	0.194219	0.198356	0.199308	0.197231	0.192952	0.221089	0.257464	0.298419	0.342025	0.394025	0.431592	0.452146	0.47088	0.48881	0.491541	0.493374	0.49804	0.487339	0.453609	0.430927	0.415034	0.389589	0.363616	0.358181
0.691157	0.601805	0.51877	0.439964	0.367817	0.318331	0.290653	0.276395	0.267115	0.264141	0.258061	0.239493	0.217231	0.190061	0.159069	0.124103	0.0844765	0.0427661	0.0228791	0.00934274	0.0191103	0.0285909	0.0371162	0.0381472	0.0300185	0.0176589	0.00210502	-0.00510114	-0.0103628	-0.0162935	-0.0230607	-0.0339119	-0.0430881	-0.0460006	-0.0462579	-0.0430099	-0.0300764	-0.0123811	-0.00340734	0.00360639	0.00818181	0.0138958	0.0211178	0.0331657	0.0475863	0.0648549	0.0824924	0.102012	0.118007	0.123475
0	0	0	0	0	0	0	0	0	0	0	0	0	0	0	0	0	0	0	0	0	0	0	0	0	0	0	0	0	0	NaN	NaN	0.795526	0.740821	0.720224	0.716706	0.735589	0.765396	0.800506	0.792487	0.777528	0.740275	0.702053	0.661881	0.637754	0.626607	0.620826	0.617647	0.63334	0.650711
1.25976	1.22639	1.15953	1.07042	0.963299	0.895308	0.837429	0.764134	0.700299	0.667784	0.630187	0.583276	0.563604	0.562642	0.551879	0.539022	0.53146	0.522121	0.508019	0.495131	0.484121	0.472492	0.460473	0.439922	0.41794	0.399697	0.380785	0.359076	0.339468	0.322612	0.302719	0.281208	0.258627	0.237467	0.228815	0.223061	0.229459	0.242743	0.265072	0.286392	0.307168	0.308656	0.304424	0.300325	0.294385	0.282294	0.27895	0.286295	0.2838	0.273876
0.342803	0.268667	0.218182	0.16947	0.131834	0.0953481	0.0697835	0.044219	0.0353822	0.0283665	0.0258099	0.0193067	0.00750737	-0.010035	-0.0304446	-0.0487109	-0.0636403	-0.0548349	-0.0396994	-0.0119529	0.0172019	0.0480463	0.0667718	0.0790915	0.0850014	0.0890483	0.101287	0.116464	0.141121	0.159569	0.170568	0.179939	0.188107	0.182569	0.172977	0.148978	0.125632	0.104659	0.0931578	0.100511	0.122981	0.156652	0.188692	0.219999	0.241473	0.256384	0.252198	0.25118	0.255455	0.248102
0.583827	0.552949	0.516584	0.485785	0.456367	0.410872	0.36598	0.324969	0.291354	0.269124	0.254485	0.242872	0.249451	0.259409	0.279426	0.312984	0.365678	0.449346	0.55774	0.70641	0.829977	0.929941	0.934426	0.899061	0.803392	0.697272	0.583422	0.48005	0.3904	0.322936	0.261825	0.21288	0.188562	0.17911	0.175601	0.170738	0.165481	0.155035	0.143718	0.125949	0.107294	0.0870319	0.0722729	0.061244	0.0511421	0.0424604	0.0430356	0.0450409	0.0498772	0.051297
0.439336	0.452793	0.465692	0.478027	0.488791	0.494886	0.495897	0.491655	0.502956	0.519871	0.532927	0.545873	0.558798	0.551129	0.518873	0.483208	0.446051	0.424488	0.407046	0.405476	0.403381	0.399906	0.392835	0.382105	0.377928	0.376105	0.411897	0.455122	0.508856	0.561725	0.612891	0.677043	0.750746	0.806423	0.859314	0.93404	0.99851	1.03856	1.08308	1.13386	1.17004	1.1979	1.16828	1.13041	1.09172	1.04915	0.997334	0.970399	0.96889	0.932506
0.516372	0.496354	0.46862	0.432282	0.409023	0.395486	0.380594	0.36649	0.386276	0.406725	0.429132	0.440274	0.432531	0.429806	0.430522	0.427199	0.424447	0.44672	0.460188	0.450184	0.435606	0.413969	0.381054	0.347664	0.351858	0.355432	0.356049	0.362837	0.379139	0.372486	0.352502	0.346855	0.34284	0.324062	0.306134	0.290461	0.263295	0.225199	0.191056	0.159206	0.127473	0.0957792	0.0746095	0.0568389	0.0513985	0.0602347	0.0877201	0.119913	0.155611	0.179018
0.456286	0.470003	0.485601	0.506711	0.511582	0.493637	0.4889	0.492411	0.497744	0.505652	0.534833	0.564412	0.594849	0.627799	0.662926	0.689897	0.714248	0.721361	0.722748	0.699185	0.673775	0.644724	0.6125	0.577752	0.551509	0.529326	0.50006	0.47081	0.447829	0.419976	0.382451	0.355536	0.336393	0.314955	0.292519	0.290309	0.292089	0.308166	0.322105	0.332518	0.325809	0.3018	0.270421	0.236135	0.199368	0.16538	0.147211	0.13114	0.120536	0.114738
0.895156	0.885777	0.801406	0.709135	0.60728	0.518201	0.435364	0.365851	0.300195	0.262827	0.230303	0.212215	0.198509	0.190134	0.190457	0.197311	0.20694	0.217586	0.226657	0.235157	0.238414	0.2423	0.24772	0.251362	0.252463	0.256164	0.26126	0.278464	0.299744	0.339203	0.371988	0.38263	0.389161	0.391079	0.39189	0.392255	0.405841	0.422819	0.455881	0.483072	0.492838	0.495788	0.491683	0.4712	0.444085	0.454695	0.469338	0.496658	0.516705	0.523406
0.428042	0.404964	0.403301	0.393929	0.369379	0.3448	0.320176	0.293662	0.26607	0.235578	0.206671	0.192969	0.188013	0.198826	0.214138	0.233047	0.263646	0.299842	0.2992	0.294779	0.28791	0.271768	0.241543	0.22646	0.22008	0.219886	0.221672	0.232708	0.243993	0.261684	0.285447	0.326766	0.369817	0.414929	0.450998	0.480455	0.506537	0.532124	0.567493	0.608278	0.663237	0.713159	0.758367	0.780987	0.796371	0.814279	0.834887	0.86624	0.892089	0.906058
0.0284792	0.0286601	0.0292079	0.0306106	0.0343917	0.0389052	0.0445954	0.0484602	0.0496387	0.0542904	0.061033	0.0611261	0.0598666	0.0644159	0.0682858	0.0686981	0.074344	0.0883642	0.096052	0.0970212	0.093503	0.0881052	0.0748375	0.0622085	0.0560876	0.0491567	0.0401975	0.034668	0.0325216	0.0366352	0.0430997	0.050293	0.0571087	0.0592223	0.0607927	0.0610875	0.0655418	0.0735564	0.0859842	0.0998193	0.115426	0.129012	0.127655	0.123498	0.114313	0.105145	0.0959882	0.097399	0.101333	0.114749
0.585075	0.578991	0.579793	0.611225	0.646922	0.724197	0.798486	0.864492	0.933382	1.00727	1.06057	1.09927	1.10536	1.10181	1.06054	1.0162	0.956387	0.904492	0.864201	0.837256	0.819031	0.808693	0.800349	0.797756	0.79456	0.789998	0.785682	0.781573	0.783876	0.789405	0.764099	0.735651	0.723741	0.707716	0.67763	0.6522	0.633065	0.604479	0.570706	0.55282	0.539953	0.559811	0.580889	0.619176	0.655417	0.68655	0.716925	0.74656	0.756203	0.753871
0.574483	0.578223	0.585471	0.610346	0.63446	0.657061	0.675767	0.689776	0.693423	0.692489	0.687118	0.679311	0.659883	0.643741	0.636329	0.647552	0.676423	0.716982	0.761359	0.802103	0.843189	0.885618	0.911664	0.918023	0.920113	0.919041	0.888188	0.849405	0.800357	0.745037	0.6713	0.601165	0.53706	0.482996	0.442069	0.406089	0.372497	0.341989	0.310851	0.274499	0.241608	0.214137	0.184053	0.151839	0.126713	0.10502	0.0995381	0.0983173	0.114486	0.135118
0.18176	0.182392	0.167013	0.16938	0.195175	0.231905	0.273806	0.324218	0.360557	0.378287	0.386292	0.386367	0.389904	0.394591	0.399611	0.386941	0.367074	0.325862	0.28966	0.26155	0.232489	0.202915	0.220731	0.248924	0.310767	0.384141	0.474065	0.55815	0.637069	0.70903	0.778685	0.804221	0.816487	0.777908	0.708764	0.595889	0.502994	0.420819	0.378798	0.348731	0.336245	0.325901	0.331386	0.334888	0.327269	0.323153	0.322966	0.304605	0.273655	0.253661
0.899153	0.947318	0.987248	0.998168	0.99882	0.958715	0.922255	0.894217	0.858971	0.817108	0.803071	0.797744	0.798289	0.79885	0.798579	0.797211	0.782202	0.75943	0.717297	0.668529	0.610054	0.557295	0.50766	0.489474	0.479401	0.489087	0.501972	0.533719	0.561132	0.576621	0.588965	0.596705	0.583465	0.551257	0.521356	0.492128	0.457811	0.430501	0.424804	0.41484	0.39999	0.400051	0.407556	0.403954	0.397132	0.377773	0.357425	0.334045	0.31615	0.307757
0.926339	0.940354	0.950208	0.967431	0.979782	0.965823	0.951682	0.937234	0.909375	0.872552	0.832023	0.789998	0.742122	0.69455	0.654512	0.616748	0.583963	0.556612	0.53404	0.509762	0.484916	0.459713	0.433853	0.400485	0.368511	0.339906	0.313651	0.291024	0.281323	0.279102	0.302497	0.330481	0.360235	0.386918	0.400737	0.415519	0.433838	0.442044	0.438065	0.440641	0.445377	0.467887	0.492858	0.525121	0.561394	0.602147	0.607048	0.597531	0.61504	0.632216
0.221762	0.223563	0.234694	0.246075	0.263916	0.287882	0.329554	0.372973	0.418469	0.454846	0.484554	0.510859	0.536664	0.572336	0.613468	0.668896	0.719244	0.764838	0.787651	0.803166	0.821226	0.842011	0.873631	0.899701	0.913789	0.917827	0.913208	0.882819	0.844194	0.837985	0.835576	0.82438	0.819765	0.839235	0.85822	0.876582	0.901531	0.929615	0.941545	0.948872	0.928778	0.902161	0.850299	0.792365	0.716883	0.64971	0.591611	0.566068	0.554638	0.572466
0.351667	0.327415	0.303812	0.280758	0.263514	0.248091	0.224268	0.200482	0.185155	0.175617	0.177252	0.189833	0.211684	0.234839	0.258661	0.290911	0.326948	0.386636	0.453056	0.533677	0.594985	0.63988	0.668951	0.689914	0.689668	0.686291	0.64486	0.605102	0.570594	0.520273	0.451507	0.410758	0.381914	0.353003	0.329664	0.340203	0.354999	0.38185	0.391231	0.381672	0.377043	0.374512	0.367588	0.361199	0.389671	0.413491	0.409158	0.404482	0.3992	0.40935
0.51429	0.499309	0.489561	0.483034	0.472071	0.468918	0.476155	0.49674	0.523628	0.564207	0.607546	0.618067	0.635226	0.693025	0.761804	0.844558	0.935397	1.00477	1.01066	0.998033	0.972018	0.950948	0.931995	0.961717	0.996816	1.07189	1.13223	1.18004	1.179	1.15421	1.08092	1.002	0.911106	0.844431	0.792623	0.803921	0.840017	0.909927	0.987885	1.07327	1.15323	1.22113	1.19902	1.18039	1.16426	1.11607	1.07464	1.06986	1.0473	1.00032
0	0	NaN	-0.0409205	-0.0459542	-0.0505074	-0.0536164	-0.0531191	-0.0485288	-0.0421351	-0.0350026	-0.0366207	-0.0406693	-0.0219398	-0.00218085	0.0371375	0.088592	0.172792	0.281838	0.414851	0.562916	0.715992	0.858396	0.971912	0.963018	0.92233	0.835888	0.718647	0.57416	0.47826	0.39852	0.34513	0.293597	0.25576	0.219837	0.188156	0.164554	0.148133	0.12987	0.110926	0.0994531	0.0889844	0.0866562	0.0901844	0.106797	0.125367	0.145816	0.15491	0.154749	0.139936
0.843189	0.885618	0.911664	0.918023	0.920113	0.919041	0.888188	0.849405	0.800357	0.745037	0.6713	0.601165	0.53706	0.482996	0.442069	0.406089	0.372497	0.341989	0.310851	0.274499	0.241608	0.214137	0.184053	0.151839	0.126713	0.10502	0.0995381	0.0983173	0.114486	0.135118	0.163202	0.190624	0.217368	0.237107	0.254029	0.256656	0.261104	0.277383	0.301478	0.338576	0.38967	0.451092	0.485446	0.508989	0.501116	0.484846	0.439937	0.392773	0.340685	0.298897
0.372486	0.352502	0.346855	0.34284	0.324062	0.306134	0.290461	0.263295	0.225199	0.191056	0.159206	0.127473	0.0957792	0.0746095	0.0568389	0.0513985	0.0602347	0.0877201	0.119913	0.155611	0.179018	0.199538	0.217803	0.231464	0.231563	0.239313	0.255562	0.25976	0.255699	0.247277	0.23798	0.230829	0.224109	0.218533	0.218203	0.225935	0.24505	0.271315	0.293498	0.315793	0.34826	0.374457	0.386816	0.398438	0.409091	0.414451	0.417012	0.43277	0.448725	0.454051
0	0	0	0	0	0	0	0	0	0	0	0	0	0	0	0	0	0	0	0	0	0	0	0	0	0	0	0	0	0	0	0	0	0	0	0	0	0	0	0	0	0	0	0	0	0	0	0	0	0
0	0	0	0	0	0	0	0	0	0	0	0	0	0	0	0	0	0	0	0	0	0	0	0	0	0	0	0	0	0	0	0	0	0	0	0	0	0	0	0	0	0	0	0	0	0	0	0	0	0
0	0	0	0	0	0	0	0	0	0	0	0	0	0	0	0	0	0	0	0	0	0	0	0	0	0	0	0	0	0	0	0	0	0	0	0	0	0	NaN	-0.0403729	-0.0453392	-0.0498315	-0.0528989	-0.0524082	-0.0478793	-0.0415712	-0.0345342	-0.0361306	-0.040125	-0.0216462
tdc-1 mutant
Time relative to onset of a forward run (s)
-20	-19.5	-19	-18.5	-18	-17.5	-17	-16.5	-16	-15.5	-15	-14.5	-14	-13.5	-13	-12.5	-12	-11.5	-11	-10.5	-10	-9.5	-9	-8.5	-8	-7.5	-7	-6.5	-6	-5.5	-5	-4.5	-4	-3.5	-3	-2.5	-2	-1.5	-1	-0.5	0	0.5	1	1.5	2	2.5	3	3.5	4	4.5
Calcium activity in AIY (dR/R0)
0.373051	0.350173	0.346908	0.359663	0.372419	0.395852	0.41939	0.439141	0.456474	0.466263	0.450589	0.434916	0.425804	0.421262	0.416202	0.408947	0.401691	0.381369	0.35716	0.32277	0.271092	0.219413	0.178697	0.138329	0.101966	0.0686168	0.0390952	0.0281679	0.0172407	0.0164805	0.0187469	0.0305358	0.0584866	0.0864373	0.12469	0.163253	0.205762	0.251766	0.296115	0.329455	0.362795	0.369298	0.365922	0.352979	0.32069	0.288402	0.258573	0.228926	0.203014	0.180401
0.148812	0.135457	0.12564	0.117022	0.112635	0.11622	0.119806	0.124123	0.128466	0.131329	0.133063	0.135038	0.138418	0.141798	0.159779	0.182693	0.200448	0.208499	0.21655	0.217475	0.218156	0.207705	0.18876	0.173634	0.177551	0.181468	0.181735	0.180766	0.179669	0.17833	0.176992	0.169709	0.161957	0.170177	0.192718	0.218673	0.268022	0.31737	0.372802	0.432167	0.489303	0.537915	0.586527	0.589578	0.581751	0.569755	0.549944	0.530133	0.495308	0.459301
0.695572	0.777492	0.850942	0.912533	0.972274	0.921577	0.870879	0.814529	0.754373	0.68955	0.605656	0.521761	0.456539	0.396085	0.338951	0.286872	0.234793	0.189698	0.144624	0.111639	0.086803	0.0636032	0.0599444	0.0562856	0.0537911	0.0518515	0.0510046	0.0533281	0.0556517	0.0528916	0.0489904	0.0460563	0.0447243	0.0433923	0.0562592	0.0694635	0.0834916	0.0981244	0.11515	0.143322	0.171495	0.189882	0.20546	0.2221	0.240489	0.258879	0.261688	0.263804	0.264559	0.264141
0.072512	0.0575534	0.0423672	0.0262424	0.0101176	-0.00104472	-0.0109313	-0.0122665	-0.000533207	0.0112001	0.0213493	0.0314912	0.039396	0.0456492	0.0502648	0.0471962	0.0441275	0.0410292	0.0379224	0.0372956	0.0407905	0.0442853	0.0482366	0.0521992	0.0582136	0.0658694	0.0719584	0.0694727	0.066987	0.0658963	0.0652566	0.0607043	0.0490665	0.0374287	0.0365331	0.0361351	0.0316865	0.0240003	0.0184484	0.024531	0.0306136	0.0313	0.030243	0.0390125	0.0655724	0.0921323	0.129799	0.167978	0.218216	0.278139
0.632093	0.642661	0.637498	0.621872	0.597816	0.535527	0.473238	0.443018	0.421807	0.397847	0.369419	0.340992	0.316497	0.292078	0.2649	0.235731	0.206905	0.179633	0.152361	0.139248	0.130118	0.119462	0.106534	0.0936065	0.0896351	0.0858346	0.0735961	0.0547643	0.0386682	0.0368173	0.0349664	0.0301716	0.0244549	0.0247231	0.0355679	0.0464128	0.0557379	0.065002	0.0832448	0.108499	0.13673	0.180407	0.224085	0.266265	0.307923	0.34549	0.375164	0.404838	0.431954	0.458853
0.0244565	0.0253135	0.0262334	0.0299144	0.0335954	0.0385614	0.0443745	0.0511896	0.0615237	0.0718578	0.0841747	0.0969192	0.110123	0.123906	0.137548	0.145036	0.152525	0.149708	0.140635	0.131717	0.123343	0.114969	0.10564	0.0960747	0.0871773	0.0793586	0.0715399	0.0634987	0.0554535	0.0460948	0.0357935	0.0268832	0.0251087	0.0233342	0.0312336	0.0424883	0.0639944	0.107061	0.150128	0.190709	0.231081	0.259622	0.277358	0.289873	0.264997	0.240121	0.227455	0.219477	0.21062	0.199922
0.248703	0.232882	0.214927	0.177593	0.140259	0.105282	0.0714174	0.0419076	0.0248378	0.00776808	0.00273126	-0.000642052	0.00081316	0.00751065	0.0138295	0.0141389	0.0144484	0.010351	0.00397733	-0.00180501	-0.00589801	-0.009991	-0.00402095	0.00359518	0.0143861	0.0286211	0.0424389	0.0496123	0.0567858	0.051675	0.0402162	0.0299432	0.0230532	0.0161633	0.0129049	0.0102399	0.018265	0.0399217	0.0629215	0.118458	0.173994	0.248802	0.33443	0.416457	0.487056	0.557656	0.573318	0.578477	0.567737	0.536723
0.0595081	0.0589977	0.0502814	0.0392422	0.0288635	0.0195652	0.0102669	0.0052521	0.000327982	0.00769703	0.0247529	0.0420212	0.0602605	0.0784998	0.0910748	0.101854	0.110299	0.114584	0.118868	0.126934	0.135159	0.141449	0.146215	0.148788	0.139802	0.130816	0.122379	0.114097	0.114723	0.129928	0.145134	0.200233	0.256165	0.321369	0.3933	0.463539	0.526062	0.588585	0.62978	0.664955	0.699774	0.73396	0.768146	0.80256	0.836983	0.854773	0.859412	0.863549	0.864594	0.865639
0.130571	0.121576	0.114729	0.109068	0.10544	0.108844	0.112249	0.123716	0.137148	0.152675	0.17129	0.189867	0.199381	0.208895	0.201597	0.18329	0.165099	0.147355	0.129612	0.119815	0.11195	0.108043	0.109977	0.111912	0.114332	0.116753	0.113067	0.105036	0.0988848	0.102298	0.105711	0.116555	0.12968	0.142367	0.154292	0.166217	0.181153	0.196823	0.210932	0.222539	0.234146	0.249596	0.265187	0.277839	0.288223	0.297042	0.297928	0.298814	0.301607	0.304986
0.431883	0.469202	0.488172	0.505026	0.53016	0.564401	0.597001	0.609632	0.622262	0.616108	0.600957	0.577795	0.533615	0.489435	0.451093	0.413577	0.383677	0.362839	0.341254	0.30709	0.272925	0.250491	0.234221	0.226403	0.243145	0.259887	0.287632	0.317227	0.342399	0.362297	0.381334	0.385889	0.390444	0.384383	0.372756	0.361448	0.351066	0.340684	0.321489	0.300824	0.282141	0.266018	0.25145	0.277375	0.303299	0.343562	0.392012	0.445018	0.512717	0.580416
0.25268	0.227813	0.202662	0.176634	0.150605	0.129146	0.108523	0.0948775	0.0906548	0.0867551	0.0954252	0.104095	0.114366	0.125676	0.138932	0.159725	0.180518	0.193281	0.204106	0.209638	0.207422	0.205159	0.194428	0.183697	0.175818	0.169796	0.164393	0.161708	0.159024	0.157509	0.156313	0.151857	0.14221	0.132562	0.128377	0.124269	0.119401	0.113995	0.112443	0.125822	0.139201	0.166782	0.201467	0.238916	0.283991	0.329066	0.375993	0.423207	0.465662	0.502664
0.262089	0.254088	0.252421	0.251202	0.254653	0.26218	0.268877	0.270203	0.271529	0.272441	0.273188	0.271434	0.264218	0.257002	0.240187	0.222468	0.201924	0.178711	0.155506	0.132371	0.109237	0.095471	0.0854558	0.0745522	0.0617081	0.048864	0.0396782	0.0309246	0.023647	0.0178789	0.0131491	0.0183616	0.0235741	0.0418692	0.0659198	0.0938621	0.131137	0.168412	0.199767	0.230272	0.251164	0.261411	0.26954	0.251309	0.233078	0.206464	0.175806	0.149486	0.13471	0.119934
0.273805	0.237569	0.206252	0.176214	0.155372	0.148697	0.142022	0.139435	0.136875	0.129357	0.118443	0.108483	0.102497	0.0965113	0.0800053	0.0607627	0.0461708	0.0393895	0.0326082	0.0382743	0.0445454	0.0666707	0.101574	0.135634	0.165046	0.194459	0.227223	0.261214	0.290502	0.310403	0.330304	0.349056	0.367726	0.369696	0.357081	0.34399	0.32783	0.311669	0.296825	0.282458	0.270089	0.262089	0.254088	0.252421	0.251202	0.254653	0.26218	0.268877	0.270203	0.271529
0.242666	0.259534	0.269072	0.258311	0.24755	0.232569	0.216929	0.200016	0.181752	0.163961	0.152953	0.141945	0.140262	0.143276	0.150388	0.168851	0.187314	0.217811	0.250181	0.268134	0.269547	0.27086	0.269953	0.269046	0.25268	0.227813	0.202662	0.176634	0.150605	0.129146	0.108523	0.0948775	0.0906548	0.0867551	0.0954252	0.104095	0.114366	0.125676	0.138932	0.159725	0.180518	0.193281	0.204106	0.209638	0.207422	0.205159	0.194428	0.183697	0.175818	0.169796
0	0	0	0	0	0	0	NaN	NaN	0.321573	0.286216	0.259516	0.239729	0.224317	0.242343	0.260369	0.278395	0.312767	0.354287	0.394563	0.431883	0.469202	0.488172	0.505026	0.53016	0.564401	0.597001	0.609632	0.622262	0.616108	0.600957	0.577795	0.533615	0.489435	0.451093	0.413577	0.383677	0.362839	0.341254	0.30709	0.272925	0.250491	0.234221	0.226403	0.243145	0.259887	0.287632	0.317227	0.342399	0.362297
0	0	0	0	0	0	0	0	0	0	0	0	0	0	0	0	0	0	0	0	0	0	0	0	0	0	0	0	NaN	NaN	0.321573	0.286216	0.259516	0.239729	0.224317	0.242343	0.260369	0.278395	0.312767	0.354287	0.394563	0.431883	0.469202	0.488172	0.505026	0.53016	0.564401	0.597001	0.609632	0.622262
0.139645	0.137908	0.125016	0.1112	0.0964039	0.0806418	0.0651556	0.0520597	0.0389638	0.0369748	0.0396802	0.0416914	0.0421085	0.0425256	0.0391181	0.0353023	0.0294829	0.021688	0.0143496	0.0109658	0.0075819	0.0055131	0.00399792	0.00133912	-0.00420968	-0.00975849	-0.00989621	-0.00932095	-0.0068055	-0.00222028	0.00262009	0.0102511	0.0178821	0.0245535	0.0307389	0.0366373	0.0417339	0.0468304	0.053477	0.0603682	0.0629203	0.0608372	0.0581843	0.0492992	0.0404142	0	0	0	0	0
Time relative to onset of a reversal (s)
-20	-19.5	-19	-18.5	-18	-17.5	-17	-16.5	-16	-15.5	-15	-14.5	-14	-13.5	-13	-12.5	-12	-11.5	-11	-10.5	-10	-9.5	-9	-8.5	-8	-7.5	-7	-6.5	-6	-5.5	-5	-4.5	-4	-3.5	-3	-2.5	-2	-1.5	-1	-0.5	0	0.5	1	1.5	2	2.5	3	3.5	4	4.5
Calcium activity in AIY (dR/R0)
0.626038	0.607632	0.589226	0.574237	0.560498	0.549883	0.546148	0.542413	0.520246	0.496311	0.46745	0.433903	0.397554	0.333603	0.269651	0.235254	0.214027	0.19716	0.190841	0.184522	0.190171	0.197257	0.19291	0.175809	0.158237	0.132202	0.106167	0.0842187	0.0644447	0.0525034	0.0637598	0.0750163	0.1305	0.194864	0.282867	0.401872	0.521564	0.661489	0.801413	0.902367	0.980712	1.039	1.03115	1.02331	0.972098	0.912189	0.847445	0.776365	0.705565	0.642981
0.992063	1.02757	1.04387	1.00775	0.971639	0.921163	0.867702	0.811216	0.75034	0.689463	0.653865	0.622108	0.589864	0.556972	0.524182	0.50355	0.482919	0.472109	0.468178	0.468442	0.486785	0.505128	0.506163	0.502553	0.493772	0.47614	0.458508	0.412438	0.360471	0.311893	0.268663	0.225433	0.195191	0.165373	0.147465	0.138607	0.13248	0.139839	0.147198	0.139599	0.126967	0.117472	0.113851	0.11023	0.110283	0.111201	0.117375	0.13116	0.144945	0.152769
0.270513	0.236231	0.210427	0.188294	0.170053	0.161914	0.153775	0.156989	0.161778	0.182662	0.221121	0.257646	0.271353	0.285061	0.311547	0.344098	0.366079	0.360637	0.355195	0.362336	0.374415	0.386086	0.396581	0.407076	0.419807	0.432908	0.436839	0.429024	0.420857	0.39443	0.368003	0.350576	0.338709	0.329587	0.331574	0.333561	0.351262	0.37344	0.388999	0.393683	0.398366	0.405154	0.411988	0.427125	0.448839	0.469258	0.481607	0.493956	0.50024	0.504369
0.619324	0.693049	0.758339	0.743921	0.729503	0.693974	0.64925	0.608236	0.576018	0.5438	0.526094	0.510431	0.514952	0.541635	0.565995	0.56169	0.557385	0.545536	0.530083	0.506063	0.457232	0.408401	0.362617	0.317343	0.267824	0.213253	0.159653	0.122195	0.0847377	0.0709371	0.0694994	0.0762816	0.10955	0.142818	0.1808	0.21957	0.240165	0.239152	0.238137	0.237095	0.236053	0.233003	0.228904	0.231752	0.254705	0.277658	0.30596	0.335176	0.385976	0.462423
0.816649	0.841224	0.800282	0.75934	0.681906	0.58885	0.493136	0.390641	0.288147	0.229732	0.17723	0.145541	0.136219	0.130284	0.175869	0.221453	0.288651	0.367913	0.440737	0.488086	0.535436	0.574113	0.61037	0.65259	0.704456	0.756322	0.830073	0.905189	0.962087	1.00358	1.03647	1.01718	0.997896	0.968755	0.936184	0.907355	0.885729	0.864103	0.851199	0.839033	0.840689	0.854999	0.865253	0.846378	0.827503	0.810527	0.794357	0.776763	0.75588	0.734997
0.563225	0.51489	0.466555	0.441946	0.426445	0.409234	0.388449	0.367664	0.356788	0.34698	0.330136	0.305735	0.285352	0.308851	0.33235	0.357948	0.384435	0.404079	0.393272	0.382464	0.341715	0.292666	0.248806	0.214058	0.17931	0.193358	0.209273	0.226094	0.243619	0.258553	0.258038	0.257523	0.242257	0.221346	0.221175	0.264403	0.307631	0.439993	0.579668	0.708634	0.827848	0.93833	0.986758	1.03519	1.04744	1.04579	1.03891	1.02106	1.0032	0.980051
0.703891	0.823217	0.942543	0.969016	0.977735	0.959582	0.907163	0.853872	0.779479	0.705087	0.653972	0.615928	0.573409	0.516674	0.459939	0.428175	0.40118	0.397497	0.423542	0.450339	0.495311	0.540282	0.586904	0.634541	0.671747	0.667063	0.662379	0.637304	0.607147	0.561312	0.489852	0.418391	0.345496	0.272601	0.219118	0.178561	0.140987	0.115345	0.0897042	0.073484	0.0596054	0.04738	0.0376341	0.0278968	0.0451317	0.0623667	0.0752458	0.0852219	0.0940368	0.0982134
0.662609	0.699617	0.736251	0.772219	0.808187	0.844395	0.880613	0.89933	0.904211	0.908563	0.909663	0.910762	0.907848	0.903371	0.911904	0.948105	0.984307	1.00448	1.02326	1.03366	1.03693	1.03141	0.971898	0.912389	0.83848	0.75951	0.680187	0.600178	0.520169	0.483323	0.450247	0.426928	0.412618	0.398288	0.383813	0.369338	0.349764	0.328208	0.303879	0.273651	0.243422	0.219743	0.196631	0.168377	0.135375	0.103957	0.0841449	0.0643329	0.052215	0.043086
0.233314	0.240848	0.248381	0.273754	0.303476	0.337834	0.379026	0.420131	0.441184	0.462237	0.446088	0.405579	0.365325	0.326063	0.286801	0.265123	0.247719	0.239075	0.243353	0.247635	0.252991	0.258347	0.25019	0.23242	0.218809	0.226361	0.233913	0.257909	0.286952	0.315026	0.341413	0.367799	0.40085	0.435523	0.466743	0.492427	0.518111	0.552298	0.586797	0.614792	0.63777	0.657285	0.659246	0.661207	0.667386	0.674862	0.688424	0.712555	0.736687	0.774227
0	0	0	0	0	0	0	0	0	0	0	0	0	0	0	0	0	0	0	NaN	NaN	0.368539	0.328018	0.297418	0.274742	0.257078	0.277737	0.298396	0.319055	0.358447	0.40603	0.452189	0.494959	0.537729	0.55947	0.578785	0.60759	0.646832	0.684194	0.698668	0.713143	0.706091	0.688726	0.662182	0.61155	0.560917	0.516976	0.47398	0.439714	0.415832
0.566051	0.608528	0.648842	0.671119	0.674249	0.674979	0.649918	0.624856	0.577311	0.519436	0.461551	0.40364	0.345729	0.314499	0.287463	0.288729	0.322608	0.358553	0.424269	0.489986	0.53681	0.574124	0.595224	0.571419	0.547614	0.514474	0.479877	0.442462	0.402059	0.362703	0.338352	0.314002	0.310279	0.316946	0.332679	0.373522	0.414365	0.481828	0.553433	0.593148	0.596274	0.599178	0.597172	0.595166	0.558962	0.503953	0.448316	0.390737	0.333158	0.285688
1.06494	1.02816	0.991374	0.955485	0.919602	0.84737	0.750248	0.657057	0.580264	0.503472	0.437102	0.373444	0.329275	0.315128	0.300981	0.295499	0.290074	0.274141	0.251011	0.229903	0.217218	0.204533	0.169552	0.128772	0.0978481	0.0834767	0.0691053	0.0811133	0.0944035	0.141293	0.215262	0.287443	0.349777	0.412111	0.481545	0.553582	0.615651	0.657826	0.700001	0.739741	0.779308	0.783484	0.756749	0.729005	0.694757	0.66051	0.629051	0.598603	0.572391	0.555435
0.0750163	0.1305	0.194864	0.282867	0.401872	0.521564	0.661489	0.801413	0.902367	0.980712	1.039	1.03115	1.02331	0.972098	0.912189	0.847445	0.776365	0.705565	0.642981	0.580396	0.523089	0.468842	0.416389	0.369837	0.323285	0.299564	0.280416	0.255905	0.223709	0.191621	0.167668	0.143715	0.12006	0.0967647	0.074165	0.0718	0.0694351	0.0738938	0.0823055	0.0937033	0.114918	0.136132	0.177182	0.222787	0.279457	0.353199	0.426942	0.499343	0.571736	0.626029
0.257835	0.286869	0.314936	0.341315	0.367694	0.400735	0.435399	0.466609	0.492286	0.517962	0.55214	0.586629	0.614616	0.637588	0.657096	0.659057	0.661017	0.667194	0.674669	0.688226	0.712351	0.736476	0.774005	0.812024	0.836468	0.849539	0.856453	0.827235	0.798016	0.766275	0.733669	0.711201	0.70801	0.704819	0.67779	0.649387	0.604326	0.545346	0.487227	0.435137	0.383046	0.384042	0.40517	0.439928	0.50299	0.566051	0.608528	0.648842	0.671119	0.674249
0	0	0	0	0	0	0	0	0	0	0	0	0	0	0	0	0	0	0	0	0	0	0	0	0	0	0	0	0	0	0	0	0	0	0	0	0	0	0	0	0	0	0	0	0	0	0	0	0	0
0	0	0	0	0	0	0	0	0	0	0	0	0	0	0	0	0	0	0	0	0	0	0	0	0	0	0	0	0	0	0	0	0	0	0	0	0	0	0	0	0	0	0	0	0	0	0	0	0	0
0.452777	0.411386	0.368723	0.306869	0.245016	0.218072	0.210557	0.204107	0.200984	0.197861	0.205643	0.215464	0.234716	0.265844	0.298031	0.377987	0.457942	0.543576	0.632956	0.72314	0.822239	0.921338	0.962658	0.974587	0.981648	0.97492	0.968192	0.905879	0.817694	0.740038	0.695198	0.650357	0.599121	0.544627	0.501095	0.495802	0.490508	0.504724	0.523722	0.547643	0.579505	0.611367	0.618975	0.626162	0.600469	0.5491	0.497776	0.446683	0.39559	0.330011
unc-31 mutant
Time relative to onset of a forward run (s)
-20	-19.5	-19	-18.5	-18	-17.5	-17	-16.5	-16	-15.5	-15	-14.5	-14	-13.5	-13	-12.5	-12	-11.5	-11	-10.5	-10	-9.5	-9	-8.5	-8	-7.5	-7	-6.5	-6	-5.5	-5	-4.5	-4	-3.5	-3	-2.5	-2	-1.5	-1	-0.5	0	0.5	1	1.5	2	2.5	3	3.5	4	4.5
Calcium activity in AIY (dR/R0)
0.350144	0.297667	0.246	0.20406	0.170302	0.142665	0.113206	0.0884374	0.0742995	0.0586807	0.0409178	0.0367473	0.029521	0.0234094	0.0153498	0.0086289	0.00504253	0.00283803	0.000362335	0.00270093	0.00425907	0.00510179	0.000618278	-0.00275047	0.00219453	0.0124711	0.0304258	0.0359188	0.0408233	0.0383425	0.0349268	0.0353931	0.0374983	0.043234	0.0537198	0.0581763	0.0511086	0.0453102	0.043516	0.0539648	0.167526	0.407913	0.631605	0.812029	0.71193	0.608839	0.488834	0.384069	0.303253	0.232103
0.0528098	0.0771582	0.115118	0.155717	0.195214	0.221489	0.225323	0.207057	0.166809	0.127067	0.0945456	0.0730508	0.059319	0.0505022	0.0456569	0.04489	0.0479249	0.0462413	0.0376755	0.0298556	0.0231153	0.0203762	0.0277761	0.0445716	0.0697065	0.120438	0.152808	0.145909	0.118489	0.0851663	0.0599348	0.0447763	0.0309912	0.0280464	0.0210409	0.0178123	0.0111612	0.00942883	0.0127363	0.013378	0.0149498	0.0106522	0.0118384	0.0114025	0.00959469	0.00634757	0.00456692	0.00874658	0.0179732	0.0398631
0.0451582	0.0442215	0.0459616	0.0501274	0.0496897	0.0432127	0.0414984	0.042715	0.063045	0.104842	0.188765	0.469138	0.723463	0.952261	0.95546	0.854383	0.737411	0.621264	0.524259	0.416867	0.332681	0.262586	0.216607	0.18441	0.156383	0.130165	0.104873	0.0889176	0.0802767	0.0808741	0.0855244	0.0927382	0.0984836	0.0949027	0.0844228	0.0737953	0.0686338	0.0696914	0.0655964	0.0608403	0.0701398	0.101654	0.227079	0.287218	0.341894	0.426408	0.54826	0.704103	0.873252	0.994603
0.0872029	0.101579	0.106898	0.0933763	0.0687086	0.0435316	0.0244281	0.0133215	0.0106155	0.0137076	0.0143489	0.013062	0.00100885	-0.00409329	-0.00539713	-0.000778704	0.00876804	0.0195454	0.0372308	0.0575736	0.0690464	0.0792914	0.0851524	0.0871813	0.0832664	0.0746692	0.0664039	0.0668638	0.0859982	0.0944118	0.10592	0.319403	0.593954	0.824758	0.939826	0.80856	0.721339	0.654285	0.590169	0.5295	0.476647	0.434378	0.408045	0.419235	0.44433	0.471398	0.528738	0.55619	0.549682	0.531213
0.0210306	0.0292104	0.0310489	0.0329215	0.0293956	0.0233442	0.0205221	0.0213444	0.0226793	0.0276376	0.0334972	0.0479805	0.0623642	0.0669962	0.0628377	0.0547882	0.046024	0.0410272	0.0323367	0.027282	0.0262544	0.0290906	0.0310523	0.0292256	0.0307211	0.0325812	0.0524578	0.0791575	0.109964	0.13367	0.137319	0.105458	0.00858797	-0.0195909	-0.0370428	0.00269327	0.0320714	0.0328701	0.0370879	0.0432547	0.040231	0.0354606	0.0399978	0.0726058	0.134774	0.233408	0.359863	0.439265	0.491952	0.508911
0.0410924	0.0355289	0.0271928	0.0232593	0.0237434	0.0242913	0.0227595	0.0220479	0.0218837	0.0328051	0.0606975	0.0923323	0.114951	0.117473	0.0991501	0.075518	0.0658148	0.0657023	0.0696552	0.0674788	0.062003	0.0579767	0.0495839	0.0417835	0.0407122	0.0420019	0.047391	0.0485164	0.0415129	0.0366688	0.0352128	0.0361112	0.0387316	0.0371364	0.0342595	0.0231446	0.0159066	0.0100855	0.00860073	0.0110086	0.00815129	0.0144459	0.0358114	0.143435	0.237756	0.312464	0.430524	0.501828	0.499403	0.468685
0.0548853	0.0451475	0.0385741	0.0334137	0.0297942	0.0303785	0.0321732	0.0323978	0.0339448	0.036328	0.0475535	0.0650753	0.0781733	0.0843505	0.0840891	0.0792735	0.0779314	0.0785603	0.0777819	0.0773384	0.0774013	0.078003	0.0791727	0.0800025	0.0750663	0.0636249	0.0537319	0.0442027	0.0375846	0.0371727	0.039307	0.0396276	0.0347355	0.0232552	0.0159983	0.014943	0.0189152	0.0280049	0.0426373	0.0705371	0.171508	0.53656	0.794696	0.962957	0.872202	0.708066	0.589908	0.512408	0.454586	0.398275
0.0410779	0.0400424	0.0403554	0.0368752	0.0240566	0.0094727	-0.00219859	-0.00270598	0.000160877	0.00688871	0.0154725	0.0213537	0.0224735	0.0315229	0.0291601	0.0350356	0.0321924	0.0316769	0.0391164	0.0427046	0.0487243	0.0472666	0.0435791	0.0431402	0.0438517	0.0401184	0.0320176	0.0302123	0.0269267	0.0337012	0.0321055	0.0289031	0.0288307	0.0308907	0.0306763	0.0285375	0.0298745	0.0384315	0.0533071	0.0666047	0.0748031	0.079799	0.0849266	0.0943421	0.0978944	0.0924211	0.0800147	0.0682021	0.0621895	0.0606055
0.093006	0.0853282	0.0820359	0.0844779	0.0822975	0.0825957	0.0752442	0.0706149	0.0685691	0.066609	0.0639245	0.0616858	0.0601168	0.0593227	0.0610933	0.0625851	0.0607843	0.0623786	0.0612439	0.0603495	0.0622987	0.0647534	0.0725763	0.0765355	0.0778361	0.0764019	0.0763952	0.0776355	0.0771156	0.0755998	0.0754081	0.0749991	0.0786403	0.0803637	0.0802612	0.0802778	0.0805574	0.0798907	0.0765285	0.0700362	0.0629902	0.0539231	0.0436068	0.0330312	0.0253986	0.0227317	0.0224598	0.0260731	0.0234763	0.0260292
0.150009	0.372162	0.549718	0.66291	0.56834	0.488019	0.427678	0.369894	0.316329	0.271723	0.218285	0.141156	0.100737	0.0736191	0.0558989	0.0435112	0.0345076	0.0276619	0.0226124	0.0237477	0.0196607	0.0151773	0.00742551	0.000928902	-0.00182316	-0.00201503	-0.00170175	0.000578227	0.00440823	0.0137132	0.0230624	0.0307063	0.034949	0.0332918	0.030203	0.0240331	0.015598	0.0116505	0.0133829	0.0209724	0.0387667	0.0809365	0.146984	0.23209	0.356757	0.537346	0.664813	0.698984	0.636791	0.558908
0.1341	0.127817	0.129019	0.153337	0.196281	0.307019	0.567898	0.77046	0.931265	0.871072	0.805629	0.766054	0.742777	0.734567	0.71869	0.69765	0.693252	0.673724	0.658331	0.629461	0.614677	0.61732	0.634237	0.662039	0.686751	0.695804	0.690426	0.679145	0.664744	0.654274	0.652385	0.657793	0.664714	0.64418	0.610095	0.56444	0.539215	0.532618	0.541935	0.568036	0.590058	0.580472	0.548189	0.50884	0.496051	0.482551	0.472411	0.46903	0.465689	0.470907
0.0257509	0.020081	0.0113734	0.00472807	-0.000556787	-0.00473413	-0.0037523	0.00486876	0.0176814	0.0349151	0.05397	0.243072	0.45205	0.624447	0.682111	0.580214	0.471778	0.385086	0.323416	0.295492	0.279869	0.266854	0.253181	0.232187	0.22111	0.207925	0.17547	0.153141	0.131	0.115762	0.100747	0.0849059	0.0766245	0.0730066	0.0850206	0.093695	0.104951	0.108387	0.104615	0.102825	0.103369	0.117621	0.206973	0.354341	0.489993	0.55776	0.535952	0.452046	0.409912	0.362255
0.286299	0.313555	0.346859	0.375266	0.3884	0.379466	0.350056	0.311246	0.293553	0.290959	0.286784	0.277135	0.255669	0.21814	0.17663	0.129789	0.100285	0.0875236	0.0797945	0.0963736	0.130141	0.172708	0.205095	0.20897	0.193516	0.169951	0.160335	0.155684	0.146399	0.127805	0.101478	0.0736841	0.0556293	0.0428262	0.0397432	0.0402438	0.0424147	0.0473602	0.0543491	0.0614067	0.0681755	0.0767879	0.0857535	0.117535	0.161881	0.333491	0.549846	0.719836	0.804901	0.668769
0.0241539	0.0266138	0.0315328	0.0331338	0.0328726	0.0311511	0.0290678	0.0284745	0.0304809	0.0343849	0.0375633	0.0410996	0.0452057	0.0508143	0.0554948	0.0568667	0.0545802	0.0497649	0.0492979	0.0489876	0.054643	0.0615459	0.0676458	0.0722783	0.073482	0.068198	0.0608187	0.0542391	0.0477629	0.0430603	0.0446013	0.0502641	0.0566851	0.061655	0.0639079	0.0666535	0.0644048	0.0576258	0.0498781	0.0455894	0.0472565	0.0529893	0.0543491	0.0578173	0.0663453	0.0809771	0.0973056	0.107997	0.110491	0.112775
0.116334	0.103042	0.0916712	0.0804133	0.0749184	0.0839634	0.100487	0.11075	0.109937	0.0968105	0.0806394	0.0721155	0.073136	0.0771572	0.0853924	0.0936187	0.089496	0.0824808	0.0718101	0.0641954	0.0579514	0.0515931	0.0451653	0.0390381	0.034074	0.0236305	0.0152353	0.0104016	0.0114964	0.0180998	0.0297394	0.0622259	0.283051	0.48392	0.628369	0.629743	0.532356	0.451199	0.380181	0.318048	0.262198	0.223733	0.200713	0.188383	0.177111	0.15605	0.123724	0.0954114	0.0800708	0.080886
0.672583	0.646703	0.600223	0.556346	0.529194	0.536913	0.576744	0.624158	0.637437	0.614742	0.578536	0.550909	0.542034	0.546954	0.555749	0.564959	0.567507	0.552323	0.51996	0.490346	0.485467	0.507145	0.549505	0.562321	0.580805	0.590527	0.597167	0.595432	0.576164	0.559061	0.548804	0.539882	0.52643	0.523693	0.516693	0.495059	0.469488	0.429284	0.39831	0.381953	0.363935	0.355516	0.346968	0.32413	0.299036	0.266776	0.237799	0.209121	0.180207	0.153909
0.112356	0.112056	0.105259	0.0973706	0.0934427	0.0896631	0.0921205	0.0913071	0.0968013	0.0984828	0.100371	0.103858	0.103064	0.10171	0.0955458	0.0977389	0.102102	0.106738	0.103883	0.0915811	0.0792176	0.0617486	0.0455796	0.0336409	0.0246867	0.0220937	0.0246353	0.0282676	0.0351508	0.0390822	0.0427022	0.0439682	0.0414266	0.035618	0.026647	0.0162003	0.0136435	0.0181255	0.0262694	0.0348492	0.0486977	0.0640085	0.0731272	0.0760012	0.0700473	0.0528265	0.0502706	0.050626	0.0667492	0.0794387
0.0529783	0.051498	0.0478833	0.0459532	0.0457984	0.0473042	0.0440972	0.0387489	0.0387856	0.0419448	0.0468848	0.0504724	0.047797	0.0445377	0.040361	0.0394873	0.0404018	0.0479863	0.0638606	0.0816649	0.0888226	0.0982767	0.109472	0.106794	0.104281	0.0860105	0.0684095	0.0580328	0.0555623	0.058869	0.0661239	0.0776292	0.0869062	0.0939479	0.0905024	0.0796248	0.0667589	0.0545735	0.0457388	0.0435807	0.0461261	0.0492314	0.0501183	0.0492476	0.0482278	0.0509499	0.0581754	0.0632294	0.0574681	0.0449257
0.197138	0.161521	0.120264	0.0824498	0.0529548	0.0456151	0.0394398	0.0360408	0.0270649	0.0169658	0.0118691	0.00959747	0.0114888	0.0131243	0.0120944	0.0120203	0.0103603	0.0105528	0.008815	0.00622234	0.0124073	0.0353567	0.0820218	0.36401	0.631993	0.836427	0.870531	0.738787	0.614285	0.520303	0.434174	0.361434	0.287371	0.227467	0.181342	0.143397	0.123828	0.101244	0.0748545	0.0845807	0.109086	0.149521	0.176322	0.186102	0.182153	0.167509	0.150365	0.1341	0.127817	0.129019
0.249175	0.214659	0.17467	0.139558	0.119636	0.109274	0.107998	0.105019	0.0969568	0.0867048	0.0765323	0.079956	0.0910956	0.100377	0.103157	0.0984193	0.0884988	0.0759007	0.0597111	0.0513667	0.0402153	0.039545	0.0429363	0.0490965	0.066218	0.0872029	0.101579	0.106898	0.0933763	0.0687086	0.0435316	0.0244281	0.0133215	0.0106155	0.0137076	0.0143489	0.013062	0.00100885	-0.00409329	-0.00539713	-0.000778704	0.00876804	0.0195454	0.0372308	0.0575736	0.0690464	0.0792914	0.0851524	0.0871813	0.0832664
0.0628318	0.0722178	0.0850326	0.0933189	0.0910239	0.0762734	0.0702078	0.0692119	0.071043	0.0737808	0.0749563	0.0730195	0.0778313	0.0986657	0.174388	0.26362	0.330423	0.344261	0.295756	0.230196	0.172285	0.142063	0.120828	0.102815	0.0873306	0.0762773	0.0714236	0.0738904	0.0761072	0.0740576	0.0679231	0.0627996	0.0599622	0.057697	0.0556638	0.048989	0.0463623	0.0433409	0.0408802	0.0386877	0.0375129	0.0391795	0.0426275	0.044594	0.0409862	0.0395864	0.0434771	0.0553156	0.0703321	0.0757813
0.0717143	0.0549142	0.0451334	0.0379628	0.0337394	0.0291662	0.0234643	0.0197329	0.0157443	0.0136889	0.01312	0.0129186	0.0135672	0.0170505	0.0174755	0.0193473	0.0329207	0.0516515	0.0712723	0.172849	0.358579	0.547052	0.677398	0.630125	0.524887	0.425561	0.32953	0.247492	0.186806	0.137208	0.100194	0.0742558	0.0554673	0.0461389	0.0390162	0.03396	0.0320971	0.0286011	0.0240587	0.0306232	0.107011	0.16114	0.199415	0.337926	0.520898	0.671888	0.754335	0.70587	0.578363	0.490609
0.186574	0.360041	0.498056	0.558295	0.48218	0.375042	0.287213	0.229671	0.203174	0.199228	0.195601	0.197489	0.189247	0.169212	0.135787	0.102462	0.0795849	0.0629434	0.0504565	0.0440774	0.0382607	0.0359461	0.0350551	0.0349807	0.0352724	0.0331928	0.0298625	0.0249318	0.0243703	0.0240728	0.0242953	0.0249684	0.0254856	0.027866	0.0305835	0.034287	0.0376122	0.0403319	0.0485499	0.146223	0.279073	0.391488	0.46415	0.41635	0.395653	0.390562	0.371415	0.337568	0.29816	0.266322
0.443259	0.432029	0.420483	0.408825	0.393749	0.374366	0.351142	0.322483	0.292973	0.280908	0.310356	0.350865	0.380012	0.377536	0.377929	0.406146	0.433366	0.446259	0.450421	0.420115	0.397688	0.374669	0.353981	0.330121	0.313717	0.311265	0.308969	0.307782	0.305529	0.313898	0.324387	0.344375	0.36627	0.377917	0.400491	0.387598	0.401449	0.42528	0.451412	0.473506	0.483561	0.475489	0.465457	0.449789	0.432453	0.414874	0.400822	0.38745	0.37955	0.378596
0.237799	0.209121	0.180207	0.153909	0.133764	0.121304	0.116156	0.122329	0.133816	0.138841	0.13088	0.113765	0.156043	0.346656	0.544814	0.709109	0.67739	0.590479	0.515601	0.459421	0.411242	0.375435	0.333654	0.301561	0.312415	0.355696	0.420099	0.477897	0.504648	0.510711	0.533899	0.541409	0.541906	0.540888	0.51589	0.480882	0.455275	0.424535	0.398122	0.381123	0.429167	0.496762	0.552606	0.567754	0.53581	0.500547	0.472541	0.446988	0.432329	0.419236
0.0175784	0.0195218	0.0222768	0.0301084	0.0450095	0.0674143	0.0955502	0.121267	0.14416	0.166451	0.18704	0.204667	0.218969	0.225655	0.223402	0.203848	0.177438	0.148624	0.127718	0.118357	0.106067	0.0879879	0.0880639	0.0997117	0.116671	0.126019	0.118869	0.100072	0.080199	0.0604798	0.048637	0.0384314	0.0311377	0.0295248	0.0329778	0.0393033	0.0468757	0.0538767	0.0613911	0.0697391	0.0944981	0.230122	0.398436	0.510891	0.63972	0.740029	0.679231	0.669676	0.670899	0.661224
0.182671	0.183622	0.165797	0.14269	0.115045	0.0930877	0.0801786	0.0685806	0.0555416	0.0415348	0.0289553	0.0207645	0.0181692	0.0158459	0.0146526	0.0141961	0.0175214	0.0283149	0.0463278	0.0640418	0.0722066	0.0739226	0.0734597	0.0713523	0.0677424	0.0665702	0.0935204	0.319457	0.523016	0.674865	0.648754	0.532598	0.432962	0.352852	0.285018	0.232741	0.192131	0.164168	0.142331	0.126128	0.117961	0.110718	0.114349	0.118452	0.120178	0.119345	0.117285	0.114563	0.114166	0.129144
0.0598959	0.0446548	0.0354262	0.0371232	0.0496542	0.0695797	0.0959726	0.133284	0.184814	0.244013	0.269507	0.256507	0.214168	0.164125	0.124556	0.0967261	0.0801061	0.0650436	0.0543965	0.0469725	0.0413243	0.0382506	0.0400042	0.0453081	0.0528098	0.0771582	0.115118	0.155717	0.195214	0.221489	0.225323	0.207057	0.166809	0.127067	0.0945456	0.0730508	0.059319	0.0505022	0.0456569	0.04489	0.0479249	0.0462413	0.0376755	0.0298556	0.0231153	0.0203762	0.0277761	0.0445716	0.0697065	0.120438
0.0375761	0.0289748	0.0256193	0.0215404	0.0284113	0.0388181	0.0464565	0.0742394	0.124413	0.241902	0.49849	0.715541	0.790495	0.686787	0.545356	0.409079	0.296392	0.220159	0.163472	0.123898	0.0995874	0.0810374	0.066342	0.0544502	0.0458374	0.042145	0.0426152	0.0556255	0.0637362	0.0710493	0.0753544	0.070286	0.0591009	0.0485412	0.0414942	0.0342995	0.0294987	0.0301128	0.0423932	0.0772988	0.231876	0.481823	0.691962	0.843793	0.747627	0.677944	0.620092	0.567891	0.51871	0.467203
0.0491698	0.0459443	0.0446955	0.0469767	0.0463199	0.0477001	0.0473833	0.0501986	0.0545699	0.0562815	0.0566316	0.0548243	0.0554081	0.0621438	0.0730698	0.0872046	0.100359	0.105932	0.0994624	0.0853887	0.0785223	0.0870993	0.10448	0.120145	0.126666	0.124419	0.121609	0.111911	0.099158	0.08724	0.0802927	0.0828694	0.0911643	0.0953204	0.0977835	0.0919259	0.0877882	0.0845101	0.088033	0.111199	0.186574	0.360041	0.498056	0.558295	0.48218	0.375042	0.287213	0.229671	0.203174	0.199228
0.496565	0.427537	0.335448	0.226602	0.182196	0.152741	0.127622	0.10658	0.0855143	0.0689728	0.0577852	0.0463996	0.0361369	0.0269065	0.0269852	0.0310024	0.0321866	0.0281943	0.0219786	0.0184631	0.0157788	0.0161163	0.0184946	0.0180396	0.0160196	0.0140724	0.0108006	0.0128781	0.0249684	0.0485924	0.115988	0.456466	0.708511	0.879442	0.849384	0.68717	0.555449	0.410336	0.297743	0.220418	0.160103	0.116439	0.0864799	0.0655063	0.0502383	0.0363686	0.0235549	0.0167507	0.0148861	0.0147451
0.122202	0.29206	0.420896	0.533128	0.533932	0.468585	0.416293	0.367012	0.3219	0.320297	0.338098	0.373098	0.394604	0.378406	0.332854	0.303804	0.274753	0.21961	0.182543	0.158346	0.145256	0.14211	0.143476	0.142098	0.131283	0.122442	0.117614	0.112702	0.10595	0.0986007	0.0910026	0.083946	0.0669872	0.0522161	0.0443218	0.042925	0.0437598	0.0411657	0.0313145	0.0257509	0.020081	0.0113734	0.00472807	-0.000556787	-0.00473413	-0.0037523	0.00486876	0.0176814	0.0349151	0.05397
0.0627996	0.0599622	0.057697	0.0556638	0.048989	0.0463623	0.0433409	0.0408802	0.0386877	0.0375129	0.0391795	0.0426275	0.044594	0.0409862	0.0395864	0.0434771	0.0553156	0.0703321	0.0757813	0.0694368	0.0610607	0.055905	0.0549648	0.0529549	0.0491698	0.0459443	0.0446955	0.0469767	0.0463199	0.0477001	0.0473833	0.0501986	0.0545699	0.0562815	0.0566316	0.0548243	0.0554081	0.0621438	0.0730698	0.0872046	0.100359	0.105932	0.0994624	0.0853887	0.0785223	0.0870993	0.10448	0.120145	0.126666	0.124419
0.402389	0.314409	0.271101	0.229309	0.15383	0.109607	0.0779962	0.0558452	0.0402547	0.0265163	0.0175687	0.0104742	0.00747076	0.00818827	0.0087393	0.00941135	0.011285	0.0145967	0.0319096	0.0783347	0.283959	0.512366	0.696957	0.764766	0.664109	0.512779	0.418437	0.320541	0.197991	0.146316	0.107602	0.0825418	0.0626897	0.046495	0.0367732	0.0298041	0.0252046	0.0200635	0.0211913	0.032772	0.0564998	0.150009	0.372162	0.549718	0.66291	0.56834	0.488019	0.427678	0.369894	0.316329
0	0	0	0	0	0	0	0	0	0	0	0	0	0	0	0	0	0	0	0	0	0	0	NaN	0.0536666	0.0476808	0.0431267	0.0463188	0.0460664	0.0443418	0.044556	0.0449233	0.0465408	0.0539611	0.0782105	0.20208	0.347842	0.459555	0.47624	0.412593	0.333966	0.244738	0.176627	0.133503	0.105115	0.0978429	0.108034	0.191218	0.433545	0.665617
0.432961	0.412818	0.400348	0.377164	0.410613	0.4962	0.569358	0.620643	0.554437	0.487611	0.432723	0.399018	0.385515	0.382689	0.377704	0.357972	0.325623	0.300925	0.279137	0.266411	0.265291	0.270666	0.2952	0.31016	0.316862	0.328894	0.358281	0.392277	0.407869	0.400235	0.360173	0.323461	0.287622	0.254159	0.226632	0.20417	0.181593	0.184307	0.188488	0.204981	0.209572	0.214011	0.22364	0.227312	0.217139	0.198333	0.189323	0.217783	0.258341	0.297937
0.0172411	0.0162268	0.0175705	0.0222517	0.0342753	0.058598	0.0770027	0.0903151	0.0855876	0.0761638	0.0643591	0.0523329	0.0467749	0.0648769	0.161273	0.473353	0.780274	0.97288	0.997985	0.899173	0.774428	0.700113	0.605879	0.444697	0.358992	0.275783	0.216324	0.172542	0.138801	0.112285	0.0897949	0.0680169	0.0579258	0.0461826	0.0390993	0.0357788	0.0350969	0.0376801	0.0451497	0.0631476	0.0997499	0.371501	0.626166	0.786271	0.826351	0.725653	0.623543	0.522933	0.452826	0.367992
0.0184946	0.0180396	0.0160196	0.0140724	0.0108006	0.0128781	0.0249684	0.0485924	0.115988	0.456466	0.708511	0.879442	0.849384	0.68717	0.555449	0.410336	0.297743	0.220418	0.160103	0.116439	0.0864799	0.0655063	0.0502383	0.0363686	0.0235549	0.0167507	0.0148861	0.0147451	0.0171146	0.017566	0.0168977	0.0159843	0.0144302	0.0167044	0.0172932	0.018856	0.0268186	0.0423592	0.0561824	0.0579972	0.0467734	0.0318848	0.0309827	0.0360976	0.0434434	0.0540144	0.0738013	0.114169	0.201498	0.501696
0.997985	0.899173	0.774428	0.700113	0.605879	0.444697	0.358992	0.275783	0.216324	0.172542	0.138801	0.112285	0.0897949	0.0680169	0.0579258	0.0461826	0.0390993	0.0357788	0.0350969	0.0376801	0.0451497	0.0631476	0.0997499	0.371501	0.626166	0.786271	0.826351	0.725653	0.623543	0.522933	0.452826	0.367992	0.27624	0.203876	0.150478	0.113603	0.0914711	0.0733886	0.0623871	0.0629707	0.0682721	0.087031	0.121137	0.164987	0.238152	0.471139	0.663364	0.802541	0.782399	0.667471
0	0	0	0	0	0	0	0	0	0	0	0	0	0	0	0	NaN	0.172502	0.150985	0.128432	0.108843	0.093208	0.0813555	0.0725529	0.0654199	0.0584533	0.0536111	0.0498063	0.0523427	0.0555242	0.0550826	0.049643	0.0451582	0.0442215	0.0459616	0.0501274	0.0496897	0.0432127	0.0414984	0.042715	0.063045	0.104842	0.188765	0.469138	0.723463	0.952261	0.95546	0.854383	0.737411	0.621264
0.0536666	0.0476808	0.0431267	0.0463188	0.0460664	0.0443418	0.044556	0.0449233	0.0465408	0.0539611	0.0782105	0.20208	0.347842	0.459555	0.47624	0.412593	0.333966	0.244738	0.176627	0.133503	0.105115	0.0978429	0.108034	0.191218	0.433545	0.665617	0.857542	0.803992	0.7062	0.599038	0.496565	0.427537	0.335448	0.226602	0.182196	0.152741	0.127622	0.10658	0.0855143	0.0689728	0.0577852	0.0463996	0.0361369	0.0269065	0.0269852	0.0310024	0.0321866	0.0281943	0.0219786	0.0184631
0.414874	0.400822	0.38745	0.37955	0.378596	0.379572	0.378863	0.388754	0.418029	0.442882	0.456076	0.450235	0.421527	0.391333	0.35383	0.319648	0.294239	0.274244	0.252048	0.228896	0.219858	0.208819	0.194397	0.1825	0.157058	0.145307	0.15442	0.173771	0.190133	0.190864	0.162709	0.135271	0.116334	0.103042	0.0916712	0.0804133	0.0749184	0.0839634	0.100487	0.11075	0.109937	0.0968105	0.0806394	0.0721155	0.073136	0.0771572	0.0853924	0.0936187	0.089496	0.0824808
0.0528265	0.0502706	0.050626	0.0667492	0.0794387	0.0857446	0.0807691	0.0630519	0.0492659	0.0517588	0.0582077	0.0657595	0.0685027	0.0686867	0.0694693	0.0696482	0.0686327	0.0644647	0.0598959	0.0446548	0.0354262	0.0371232	0.0496542	0.0695797	0.0959726	0.133284	0.184814	0.244013	0.269507	0.256507	0.214168	0.164125	0.124556	0.0967261	0.0801061	0.0650436	0.0543965	0.0469725	0.0413243	0.0382506	0.0400042	0.0453081	0.0528098	0.0771582	0.115118	0.155717	0.195214	0.221489	0.225323	0.207057
0.1296	0.366329	0.609758	0.784045	0.85287	0.780572	0.683547	0.581593	0.451507	0.343536	0.255883	0.182155	0.125427	0.0900516	0.0705678	0.0569791	0.0438168	0.0339625	0.0257637	0.0181438	0.0115908	0.00616287	0.00728472	0.0104968	0.0137023	0.0148127	0.0172411	0.0162268	0.0175705	0.0222517	0.0342753	0.058598	0.0770027	0.0903151	0.0855876	0.0761638	0.0643591	0.0523329	0.0467749	0.0648769	0.161273	0.473353	0.780274	0.97288	0.997985	0.899173	0.774428	0.700113	0.605879	0.444697
0.523024	0.559289	0.49579	0.437054	0.395967	0.360854	0.325424	0.297545	0.288657	0.306566	0.34373	0.365108	0.363424	0.339213	0.299885	0.277049	0.258706	0.28376	0.360722	0.445892	0.499946	0.505065	0.464613	0.450562	0.447115	0.442407	0.431193	0.413211	0.386526	0.349045	0.312874	0.275166	0.248995	0.228014	0.209801	0.190969	0.167048	0.136092	0.106835	0.0874321	0.0887911	0.110587	0.145107	0.182993	0.215416	0.231477	0.224002	0.197779	0.160676	0.123757
0.094102	0.0699006	0.0526308	0.0463277	0.0468177	0.0500769	0.0526278	0.0541955	0.0561543	0.0575008	0.0565853	0.0606239	0.0548853	0.0451475	0.0385741	0.0334137	0.0297942	0.0303785	0.0321732	0.0323978	0.0339448	0.036328	0.0475535	0.0650753	0.0781733	0.0843505	0.0840891	0.0792735	0.0779314	0.0785603	0.0777819	0.0773384	0.0774013	0.078003	0.0791727	0.0800025	0.0750663	0.0636249	0.0537319	0.0442027	0.0375846	0.0371727	0.039307	0.0396276	0.0347355	0.0232552	0.0159983	0.014943	0.0189152	0.0280049
0.0124167	0.0128207	0.0155197	0.0145113	0.0140335	0.0152759	0.0166183	0.0197241	0.0194545	0.0211607	0.0249476	0.0343788	0.0465127	0.0557171	0.0579332	0.0534298	0.047289	0.0467279	0.0455808	0.0486083	0.0526812	0.0590557	0.0707035	0.0754029	0.0777343	0.0712461	0.0628203	0.0628318	0.0722178	0.0850326	0.0933189	0.0910239	0.0762734	0.0702078	0.0692119	0.071043	0.0737808	0.0749563	0.0730195	0.0778313	0.0986657	0.174388	0.26362	0.330423	0.344261	0.295756	0.230196	0.172285	0.142063	0.120828
0.117285	0.114563	0.114166	0.129144	0.141193	0.151663	0.146664	0.145488	0.214059	0.374947	0.538662	0.683116	0.628051	0.55399	0.473609	0.403937	0.350144	0.297667	0.246	0.20406	0.170302	0.142665	0.113206	0.0884374	0.0742995	0.0586807	0.0409178	0.0367473	0.029521	0.0234094	0.0153498	0.0086289	0.00504253	0.00283803	0.000362335	0.00270093	0.00425907	0.00510179	0.000618278	-0.00275047	0.00219453	0.0124711	0.0304258	0.0359188	0.0408233	0.0383425	0.0349268	0.0353931	0.0374983	0.043234
0.0742558	0.0554673	0.0461389	0.0390162	0.03396	0.0320971	0.0286011	0.0240587	0.0306232	0.107011	0.16114	0.199415	0.337926	0.520898	0.671888	0.754335	0.70587	0.578363	0.490609	0.429534	0.374316	0.312201	0.245765	0.1909	0.153037	0.12062	0.0973143	0.0776861	0.0614954	0.048562	0.0375761	0.0289748	0.0256193	0.0215404	0.0284113	0.0388181	0.0464565	0.0742394	0.124413	0.241902	0.49849	0.715541	0.790495	0.686787	0.545356	0.409079	0.296392	0.220159	0.163472	0.123898
0.018856	0.0268186	0.0423592	0.0561824	0.0579972	0.0467734	0.0318848	0.0309827	0.0360976	0.0434434	0.0540144	0.0738013	0.114169	0.201498	0.501696	0.641058	0.76651	0.887754	0.812343	0.690886	0.557991	0.415824	0.291639	0.207814	0.151115	0.115276	0.088142	0.0692521	0.0541638	0.0404711	0.0331646	0.0275651	0.0259221	0.0238839	0.0216585	0.0186046	0.0148854	0.0137502	0.0227517	0.0488796	0.1296	0.366329	0.609758	0.784045	0.85287	0.780572	0.683547	0.581593	0.451507	0.343536
0.070286	0.0591009	0.0485412	0.0414942	0.0342995	0.0294987	0.0301128	0.0423932	0.0772988	0.231876	0.481823	0.691962	0.843793	0.747627	0.677944	0.620092	0.567891	0.51871	0.467203	0.402389	0.314409	0.271101	0.229309	0.15383	0.109607	0.0779962	0.0558452	0.0402547	0.0265163	0.0175687	0.0104742	0.00747076	0.00818827	0.0087393	0.00941135	0.011285	0.0145967	0.0319096	0.0783347	0.283959	0.512366	0.696957	0.764766	0.664109	0.512779	0.418437	0.320541	0.197991	0.146316	0.107602
0.133503	0.105115	0.0978429	0.108034	0.191218	0.433545	0.665617	0.857542	0.803992	0.7062	0.599038	0.496565	0.427537	0.335448	0.226602	0.182196	0.152741	0.127622	0.10658	0.0855143	0.0689728	0.0577852	0.0463996	0.0361369	0.0269065	0.0269852	0.0310024	0.0321866	0.0281943	0.0219786	0.0184631	0.0157788	0.0161163	0.0184946	0.0180396	0.0160196	0.0140724	0.0108006	0.0128781	0.0249684	0.0485924	0.115988	0.456466	0.708511	0.879442	0.849384	0.68717	0.555449	0.410336	0.297743
0.101246	0.106731	0.10661	0.0944957	0.0722831	0.0508155	0.0426352	0.0560138	0.0797569	0.100355	0.106615	0.0975981	0.0863933	0.0923757	0.128505	0.160799	0.182671	0.183622	0.165797	0.14269	0.115045	0.0930877	0.0801786	0.0685806	0.0555416	0.0415348	0.0289553	0.0207645	0.0181692	0.0158459	0.0146526	0.0141961	0.0175214	0.0283149	0.0463278	0.0640418	0.0722066	0.0739226	0.0734597	0.0713523	0.0677424	0.0665702	0.0935204	0.319457	0.523016	0.674865	0.648754	0.532598	0.432962	0.352852
0.0733886	0.0623871	0.0629707	0.0682721	0.087031	0.121137	0.164987	0.238152	0.471139	0.663364	0.802541	0.782399	0.667471	0.55664	0.489178	0.399752	0.285414	0.200435	0.140554	0.102063	0.0717143	0.0549142	0.0451334	0.0379628	0.0337394	0.0291662	0.0234643	0.0197329	0.0157443	0.0136889	0.01312	0.0129186	0.0135672	0.0170505	0.0174755	0.0193473	0.0329207	0.0516515	0.0712723	0.172849	0.358579	0.547052	0.677398	0.630125	0.524887	0.425561	0.32953	0.247492	0.186806	0.137208
0.0703321	0.0757813	0.0694368	0.0610607	0.055905	0.0549648	0.0529549	0.0491698	0.0459443	0.0446955	0.0469767	0.0463199	0.0477001	0.0473833	0.0501986	0.0545699	0.0562815	0.0566316	0.0548243	0.0554081	0.0621438	0.0730698	0.0872046	0.100359	0.105932	0.0994624	0.0853887	0.0785223	0.0870993	0.10448	0.120145	0.126666	0.124419	0.121609	0.111911	0.099158	0.08724	0.0802927	0.0828694	0.0911643	0.0953204	0.0977835	0.0919259	0.0877882	0.0845101	0.088033	0.111199	0.186574	0.360041	0.498056
0.0259221	0.0238839	0.0216585	0.0186046	0.0148854	0.0137502	0.0227517	0.0488796	0.1296	0.366329	0.609758	0.784045	0.85287	0.780572	0.683547	0.581593	0.451507	0.343536	0.255883	0.182155	0.125427	0.0900516	0.0705678	0.0569791	0.0438168	0.0339625	0.0257637	0.0181438	0.0115908	0.00616287	0.00728472	0.0104968	0.0137023	0.0148127	0.0172411	0.0162268	0.0175705	0.0222517	0.0342753	0.058598	0.0770027	0.0903151	0.0855876	0.0761638	0.0643591	0.0523329	0.0467749	0.0648769	0.161273	0.473353
0.400235	0.360173	0.323461	0.287622	0.254159	0.226632	0.20417	0.181593	0.184307	0.188488	0.204981	0.209572	0.214011	0.22364	0.227312	0.217139	0.198333	0.189323	0.217783	0.258341	0.297937	0.321951	0.317934	0.306	0.285954	0.260781	0.22813	0.187419	0.147097	0.119221	0.108442	0.101058	0.0992926	0.101246	0.106731	0.10661	0.0944957	0.0722831	0.0508155	0.0426352	0.0560138	0.0797569	0.100355	0.106615	0.0975981	0.0863933	0.0923757	0.128505	0.160799	0.182671
Time relative to onset of a reversal (s)
-20	-19.5	-19	-18.5	-18	-17.5	-17	-16.5	-16	-15.5	-15	-14.5	-14	-13.5	-13	-12.5	-12	-11.5	-11	-10.5	-10	-9.5	-9	-8.5	-8	-7.5	-7	-6.5	-6	-5.5	-5	-4.5	-4	-3.5	-3	-2.5	-2	-1.5	-1	-0.5	0	0.5	1	1.5	2	2.5	3	3.5	4	4.5
Calcium activity in AIY (dR/R0)
1.06674	1.03914	1.05891	1.08956	1.10529	1.11356	1.11353	1.1148	1.13195	1.15643	1.14861	1.10248	1.04145	1.0275	1.01344	0.99114	0.954965	0.888886	0.839703	0.792042	0.764154	0.752029	0.749746	0.736764	0.696886	0.637166	0.572189	0.557208	0.565779	0.579862	0.680726	0.796212	0.907169	0.965785	0.923992	0.848733	0.755806	0.682494	0.619367	0.55807	0.491881	0.444072	0.468289	0.512095	0.581948	0.595592	0.600168	0.618058	0.646188	0.670276
1.0791	0.954307	0.879732	0.816111	0.873771	0.925414	0.963725	0.96684	0.950771	0.901984	0.851462	0.85668	0.929568	0.987567	1.07278	1.01754	0.995535	0.945492	0.886048	0.848148	0.793463	0.741591	0.704603	0.674233	0.673226	0.683562	0.692939	0.70466	0.724118	0.727184	0.761264	0.774637	0.804517	0.827689	0.833062	0.840281	0.812168	0.783555	0.749981	0.670885	0.586574	0.539811	0.5665	0.694028	0.795254	0.848969	0.807612	0.76746	0.732046	0.702857
0.797373	0.845488	0.864636	0.818965	0.788611	0.787694	0.79376	0.809972	0.825547	0.817199	0.804084	0.833527	0.868126	0.900072	0.88529	0.840369	0.809426	0.780337	0.782284	0.775518	0.773566	0.764842	0.756695	0.759064	0.771503	0.795225	0.799703	0.801192	0.794413	0.789516	0.787678	0.782459	0.77599	0.767266	0.756978	0.746541	0.722436	0.700532	0.692268	0.686656	0.677839	0.654252	0.616528	0.573934	0.533891	0.496107	0.458184	0.419386	0.369514	0.331491
0.729375	0.735513	0.730797	0.732265	0.765627	0.836587	0.925329	1.00407	1.02074	1.01726	0.984446	0.955038	0.940913	0.933762	0.92798	0.912532	0.897642	0.885085	0.85966	0.846895	0.855888	0.906597	0.97002	0.997605	0.9782	0.911431	0.832174	0.782068	0.747286	0.730533	0.719113	0.691088	0.666776	0.638982	0.658024	0.776932	0.921841	1.01889	1.03422	0.983225	0.915241	0.83357	0.812622	0.802673	0.831369	0.852835	0.855928	0.842602	0.819658	0.796663
0.77702	0.948466	1.06223	1.09885	1.1014	1.07554	0.985747	0.845067	0.754182	0.656114	0.576866	0.478921	0.416035	0.412865	0.451535	0.489954	0.504441	0.45031	0.42963	0.41699	0.456489	0.523189	0.572858	0.60282	0.553569	0.462934	0.377651	0.309581	0.28155	0.295745	0.325565	0.343468	0.303176	0.2604	0.241577	0.252881	0.277844	0.293658	0.28877	0.265859	0.258693	0.252554	0.333275	0.429256	0.50798	0.543788	0.502543	0.499865	0.477638	0.45107
0.136637	0.136403	0.14461	0.140092	0.128723	0.120364	0.10294	0.0867461	0.0845218	0.0871995	0.0983877	0.100724	0.0861841	0.0761276	0.0731047	0.0749698	0.0804099	0.0770983	0.0711256	0.0480501	0.0330233	0.0209383	0.0178558	0.0228549	0.0169228	0.029991	0.0743474	0.297782	0.493601	0.648701	0.893803	1.04184	1.0368	0.973028	0.860828	0.77012	0.690507	0.612456	0.544624	0.495455	0.475829	0.495584	0.508671	0.503347	0.488763	0.473958	0.459127	0.432921	0.387151	0.341058
0.0929554	0.100301	0.0999898	0.0942637	0.0926677	0.0934155	0.0924899	0.0919626	0.0920374	0.0927528	0.0941438	0.0951305	0.0892609	0.075656	0.0638923	0.0525612	0.0446917	0.0442018	0.0467397	0.047121	0.0413037	0.0276526	0.0190234	0.0177686	0.022492	0.0333004	0.0506998	0.0838753	0.203939	0.63802	0.944968	1.14505	1.03713	0.841957	0.701456	0.609301	0.540546	0.473586	0.435046	0.398711	0.354653	0.330138	0.32783	0.32281	0.313413	0.306018	0.287791	0.284208	0.266817	0.25018
0.0618126	0.0867029	0.0802039	0.0963645	0.0885443	0.0871265	0.107589	0.117458	0.134015	0.130005	0.119863	0.118656	0.120613	0.110345	0.0880636	0.083098	0.0740612	0.092694	0.0883052	0.0794972	0.0792981	0.0849641	0.0843742	0.0784915	0.0821688	0.105705	0.14662	0.183194	0.205744	0.219485	0.233588	0.259485	0.269256	0.254201	0.220078	0.187588	0.17105	0.166694	0.157045	0.133062	0.114517	0.0967548	0.081825	0.0746888	0.0763979	0.0822068	0.0881028	0.111893	0.162043	0.246234
0.498066	0.452536	0.436823	0.441211	0.446576	0.442831	0.429782	0.387865	0.365914	0.321395	0.29247	0.268326	0.257973	0.265652	0.258796	0.259733	0.236615	0.222058	0.215624	0.209461	0.201019	0.193979	0.189045	0.186548	0.192116	0.196807	0.191144	0.196158	0.192589	0.189777	0.195907	0.203626	0.228226	0.240676	0.244766	0.240256	0.240235	0.244135	0.2425	0.237733	0.237131	0.235845	0.247295	0.252714	0.252392	0.252444	0.253324	0.251227	0.240654	0.220238
0.772721	0.630554	0.483031	0.298357	0.220488	0.162148	0.124384	0.0944688	0.0700645	0.0554144	0.0449125	0.0379815	0.0302343	0.0319337	0.049385	0.0851411	0.226053	0.560821	0.828384	0.998957	0.856446	0.735408	0.644479	0.557403	0.476684	0.409467	0.328939	0.212712	0.151804	0.110939	0.0842355	0.0655681	0.0520004	0.0416844	0.0340753	0.0357861	0.0296272	0.0228711	0.0111897	0.00139979	-0.00274737	-0.00303651	-0.00256441	0.000871345	0.00664287	0.0206648	0.0347533	0.0462721	0.0526656	0.0501682
0.0426787	0.0990075	0.439392	0.762871	1.00964	1.05081	0.891781	0.741496	0.628051	0.524086	0.436282	0.346882	0.274572	0.218895	0.173093	0.149472	0.122211	0.090356	0.102096	0.131677	0.180485	0.212836	0.224641	0.219874	0.202198	0.181504	0.161871	0.154287	0.155737	0.185092	0.236929	0.370599	0.685503	0.930013	1.12412	1.05146	0.972465	0.924695	0.896597	0.886688	0.867522	0.842125	0.836816	0.813244	0.794663	0.759815	0.741969	0.74516	0.76558	0.799139
0.49892	0.526647	0.581167	0.614666	0.589435	0.51848	0.473228	0.427976	0.342082	0.284343	0.246653	0.226262	0.221362	0.223489	0.221342	0.204497	0.190725	0.183205	0.175553	0.165037	0.153588	0.141753	0.130761	0.104344	0.0813358	0.0690391	0.0668632	0.0681636	0.0641229	0.0487779	0.0401116	0.0312797	0.0177162	0.00736481	-0.000867295	-0.00737424	-0.00584487	0.00758396	0.0275419	0.0543864	0.0840678	0.378628	0.704148	0.972686	1.06251	0.903786	0.734878	0.599839	0.503778	0.460281
0.906342	0.838519	0.801044	0.791245	0.805085	0.843859	0.876576	0.862335	0.814375	0.75592	0.736921	0.716866	0.701802	0.696779	0.691816	0.699568	0.698932	0.682164	0.645695	0.619647	0.607516	0.607562	0.621075	0.580025	0.526098	0.481734	0.463262	0.455473	0.445877	0.433006	0.41598	0.39943	0.398588	0.425319	0.46581	0.515285	0.557485	0.576997	0.563726	0.520034	0.46238	0.436095	0.432242	0.426039	0.411704	0.379816	0.324064	0.262398	0.192811	0.148981
1.06815	1.05274	1.00085	0.928303	0.843879	0.746849	0.661581	0.591008	0.548128	0.516461	0.48833	0.450981	0.404246	0.361358	0.324095	0.293603	0.263499	0.233686	0.212681	0.197444	0.182359	0.166716	0.152162	0.145222	0.131096	0.117551	0.102435	0.0900559	0.0828312	0.0801461	0.0781878	0.0704487	0.0646819	0.0580668	0.0554819	0.0519317	0.0472057	0.0424469	0.0365571	0.0384557	0.0423721	0.0502037	0.0527527	0.0523368	0.049596	0.0462792	0.0453345	0.048529	0.0547445	0.059805
0.722754	0.758129	0.774228	0.761304	0.745242	0.720155	0.692399	0.664253	0.641755	0.620344	0.607696	0.606169	0.607732	0.606596	0.622433	0.669306	0.709097	0.730222	0.72087	0.674905	0.626562	0.566515	0.511787	0.471104	0.439092	0.403554	0.366485	0.352014	0.33434	0.311248	0.2922	0.251465	0.232651	0.247242	0.278224	0.304421	0.305591	0.260513	0.216582	0.186262	0.16498	0.146774	0.12875	0.119952	0.134433	0.16089	0.177321	0.17602	0.155003	0.129111
0.191794	0.148195	0.129337	0.117915	0.142415	0.192315	0.255218	0.303076	0.308802	0.285966	0.251143	0.236933	0.23006	0.216339	0.188862	0.149957	0.108886	0.0822054	0.0632858	0.05873	0.0594697	0.0626778	0.069986	0.0803136	0.090743	0.100745	0.113472	0.126721	0.173686	0.239218	0.492813	0.812527	1.06373	1.18943	0.988265	0.838205	0.693574	0.593213	0.513744	0.493118	0.574193	0.734198	0.907572	0.9939	0.955657	0.886971	0.822133	0.78201	0.793416	0.852276
0.560182	0.465977	0.386159	0.304469	0.245783	0.188054	0.142198	0.0927608	0.0612478	0.0557058	0.0608985	0.0574034	0.0490664	0.0293038	0.0317532	0.0416312	0.0465108	0.0462613	0.0488823	0.0568599	0.0482298	0.0360523	0.0268813	0.0321967	0.0580085	0.0948154	0.121992	0.173657	0.201076	0.225468	0.212368	0.181521	0.163165	0.172488	0.232453	0.269435	0.28913	0.288583	0.29832	0.321168	0.34677	0.374819	0.389477	0.438157	0.4579	0.45668	0.428979	0.396829	0.380821	0.365418
0.282982	0.271173	0.2601	0.255709	0.261439	0.264024	0.261226	0.262172	0.272173	0.289348	0.308395	0.322127	0.30894	0.295322	0.289415	0.295342	0.307033	0.308145	0.292388	0.271029	0.254108	0.228785	0.196902	0.162514	0.128018	0.0994491	0.0759671	0.0524851	0.0372702	0.0282022	0.0244817	0.0245524	0.0217133	0.0141484	0.0198659	0.0220036	0.0286925	0.0324841	0.0285025	0.0241806	0.030051	0.0297922	0.0324342	0.0480659	0.0569419	0.0637162	0.0619358	0.0575886	0.0552673	0.0550811
0.722436	0.700532	0.692268	0.686656	0.677839	0.654252	0.616528	0.573934	0.533891	0.496107	0.458184	0.419386	0.369514	0.331491	0.310427	0.310691	0.323567	0.345026	0.371368	0.384571	0.412633	0.433657	0.456805	0.47516	0.483483	0.478385	0.460393	0.440107	0.432643	0.430881	0.428117	0.415168	0.415968	0.457975	0.528558	0.590701	0.592403	0.549419	0.484896	0.395091	0.309763	0.266656	0.222503	0.15949	0.125456	0.102109	0.0965434	0.105505	0.131518	0.184026
0.255713	0.220357	0.1882	0.163567	0.148331	0.142036	0.149583	0.16363	0.169774	0.160039	0.139112	0.190809	0.423891	0.666198	0.867097	0.828312	0.722037	0.630476	0.561779	0.502865	0.459081	0.407991	0.368749	0.382021	0.434945	0.513696	0.584372	0.617082	0.624496	0.652851	0.662034	0.662642	0.661397	0.63083	0.588021	0.55671	0.519121	0.486822	0.466036	0.524785	0.60744	0.675726	0.694248	0.655187	0.612068	0.577823	0.546576	0.528651	0.512641	0.492606
0.128169	0.10972	0.0887288	0.0672103	0.0516799	0.0462534	0.0457001	0.0530523	0.0477685	0.052963	0.0546373	0.0535708	0.0521895	0.0477875	0.0390409	0.0358701	0.0241155	0.0197676	0.013335	0.0085854	0.00848163	0.00617844	0.00302811	0.0021127	-7.44426e-05	0.00187896	0.00637819	0.0115455	0.0152478	0.0190346	0.022279	0.020937	0.025265	0.026087	0.0315788	0.0295268	0.0285547	0.0310826	0.033814	0.0401337	0.039585	0.0430567	0.0507621	0.0699524	0.0946418	0.11337	0.11788	0.108716	0.0962214	0.0950796
1.0389	1.06571	0.960194	0.826983	0.747625	0.646996	0.474876	0.383354	0.294498	0.231004	0.184251	0.14822	0.119906	0.0958886	0.0726328	0.0618568	0.0493167	0.0417527	0.0382068	0.0374787	0.0402372	0.0482137	0.067433	0.106519	0.396713	0.66866	0.83963	0.88243	0.774899	0.665859	0.558421	0.483556	0.392965	0.294987	0.217712	0.16069	0.121312	0.0976786	0.078369	0.0666209	0.0672441	0.0729052	0.0929372	0.129358	0.176183	0.254314	0.503113	0.708382	0.857005	0.835495
0.096557	0.0902643	0.0851395	0.0805734	0.0781267	0.0815975	0.0887787	0.0928742	0.0853604	0.082445	0.090548	0.115204	0.146478	0.157827	0.144613	0.127169	0.116431	0.114473	0.110287	0.102404	0.0956864	0.0930855	0.0978365	0.0964686	0.099343	0.0986834	0.104547	0.11365	0.117215	0.117944	0.11418	0.115396	0.129424	0.15218	0.181618	0.209014	0.22062	0.207146	0.177836	0.163535	0.181398	0.217596	0.250221	0.263803	0.259123	0.25327	0.233074	0.206512	0.181691	0.167222
[truncated: 83 more rows]
[truncated: 131 more columns]
