# Supplementary material for: Corollary discharge promotes a sustained motor state in a neural circuit for navigation
Source: eLife. 2021 Apr 21;10:e68848. doi: 10.7554/eLife.68848 (PMC8139836; doi:10.7554/eLife.68848)
Supplement: Figure 5—source data 1. [file elife-68848-fig5-data1.xlsx]

## Sheet: Fig 5ABD
	Time (s)	Temperature change (Celsius/s)	Locomotion state (Forward = 1, Reverse = -1)	Calcium activity of AIY (dR/R0)	AVA	RME	SMDD	SMDV
Animal 1	0.4576	0.209698		0.443358	1.86287	4.19896	3.26736	3.28588
	0.9576	0.188332		0.930946	1.88793	3.92862	2.68782	3.2666
	1.4576	0.176501		1.28422	1.91518	3.77505	2.34507	3.23582
	1.9576	0.161358		1.5232	1.94309	3.7201	2.19541	3.19405
	2.4576	0.147115		1.66788	1.9701	3.74566	2.19513	3.14179
	2.9576	0.129551		1.73828	1.99468	3.83357	2.30053	3.07956
	3.4576	0.107267		1.75441	2.01528	3.96572	2.46791	3.00784
	3.9576	0.0862794		1.73627	2.03036	4.12395	2.65357	2.92716
	4.4576	0.0635888		1.70387	2.03838	4.29015	2.81382	2.838
	4.9576	0.0401685		1.67723	2.0378	4.44617	2.90494	2.74087
	5.4576	0.0150952		0.863413	2.17581	3.98556	4.34525	2.33127
	5.9576	-0.00920344		1.57958	2.07227	4.52741	3.29302	2.50062
	6.4576	-0.0321422		2.06302	1.98009	4.79633	2.57524	2.62517
	6.9576	-0.0528023		2.34724	1.90435	4.8462	2.13943	2.70747
	7.4576	-0.0719263		2.46574	1.85014	4.73093	1.93311	2.75006
	7.9576	-0.0885037		2.45202	1.82254	4.50443	1.90381	2.75549
	8.4576	-0.101755		2.33959	1.82663	4.22059	1.99903	2.7263
	8.9576	-0.110895		2.16195	1.86749	3.93332	2.16631	2.66504
	9.4576	-0.115836		1.9526	1.95022	3.69652	2.35317	2.57426
	9.9576	-0.116112		1.74504	2.07988	3.56409	2.50711	2.45649
	10.4576	-0.111745		1.65359	2.07859	3.41591	2.23181	2.29339
	10.9576	-0.100547		1.50318	2.20702	3.62954	3.30934	2.20235
	11.4576	-0.0839231		1.43018	2.31	3.74438	4.31766	2.08705
	11.9576	-0.0630807		1.41683	2.39179	3.78359	5.24268	1.95736
	12.4576	-0.0397347		1.44538	2.45664	3.77031	6.07032	1.82316
	12.9576	-0.0150289		1.49807	2.50882	3.72768	6.78651	1.69436
	13.4576	0.00994614		1.55715	2.55256	3.67884	7.37715	1.58082
	13.9576	0.0340765		1.60486	2.59213	3.64692	7.82817	1.49244
	14.4576	0.0555212		1.62344	2.63178	3.65508	8.12549	1.43911
	14.9576	0.0741016		1.59515	2.67577	3.72645	8.25502	1.43072
	15.4576	0.0889024		1.63082	2.66336	3.93657	9.55715	1.35264
	15.9576	0.101573		1.57032	2.63939	4.21571	9.64911	1.36676
	16.4576	0.111087		1.56499	2.60168	4.58059	9.32249	1.33281
	16.9576	0.116477		1.60043	2.55637	5.00512	8.67793	1.27487
	17.4576	0.116131		1.66225	2.50958	5.46316	7.81604	1.21697
	17.9576	0.110182		1.73606	2.46744	5.9286	6.83744	1.18318
	18.4576	0.0989368		1.80745	2.43608	6.37532	5.84278	1.19756
	18.9576	0.0834695		1.86204	2.42164	6.7772	4.93266	1.28416
	19.4576	0.0630273		1.88543	2.43024	7.10813	4.20771	1.46703
	19.9576	0.0391898		1.86322	2.46801	7.34199	3.76857	1.77023
	20.4576	0.0135226		1.86184	2.41811	7.47007	3.46957	1.79044
	20.9576	-0.0109793		1.8716	2.37446	7.33068	3.33088	1.96567
	21.4576	-0.0338311		1.89198	2.3264	7.28842	3.16711	2.11792
	21.9576	-0.0540382		1.91647	2.27755	7.32167	2.98622	2.24817
	22.4576	-0.0726895		1.93851	2.23152	7.40884	2.79617	2.35739
	22.9576	-0.0887984		1.95156	2.19193	7.5283	2.60493	2.44658
	23.4576	-0.101595		1.9491	2.16239	7.65845	2.42046	2.51671
	23.9576	-0.110396		1.92458	2.14654	7.77767	2.25073	2.56877
	24.4576	-0.115343		1.87146	2.14797	7.86436	2.1037	2.60373
	24.9576	-0.115853		1.7832	2.17032	7.8969	1.98734	2.62259
	25.4576	-0.111789		1.65539	2.1819	8.32897	1.8078	2.73926
	25.9576	-0.100702		1.59129	2.21893	7.55881	1.94437	2.57039
	26.4576	-0.0839855		1.52022	2.22619	6.91303	2.06394	2.43193
	26.9576	-0.06295		1.44765	2.20957	6.37474	2.16584	2.32324
	27.4576	-0.0395635		1.37906	2.17492	5.92704	2.24938	2.24365
	27.9576	-0.0149013		1.31992	2.12813	5.55304	2.31386	2.19251
	28.4576	0.00999411		1.27573	2.07507	5.23585	2.35861	2.16916
	28.9576	0.0338331		1.25195	2.0216	4.95856	2.38293	2.17295
	29.4576	0.0549125		1.25406	1.97361	4.70428	2.38614	2.20322
	29.9576	0.073113		1.28755	1.93696	4.45611	2.36755	2.25932
	30.4576	0.0877094		1.39537	1.94691	4.19194	2.31013	2.3016
	30.9576	0.100541		1.4138	1.83104	3.98792	2.26923	2.35095
	31.4576	0.11048		1.45415	1.7724	3.7914	2.24461	2.37491
	31.9576	0.11625		1.51026	1.76089	3.6072	2.24633	2.37544
	32.4576	0.116265		1.57599	1.7864	3.44015	2.28445	2.35447
	32.9576	0.110623		1.64519	1.83883	3.29505	2.36902	2.31393
	33.4576	0.0996024		1.71173	1.90806	3.17673	2.51009	2.25576
	33.9576	0.0842232		1.76945	1.98399	3.09	2.71771	2.18191
	34.4576	0.0638113		1.81222	2.05651	3.03969	3.00194	2.09431
	34.9576	0.0399838		1.83388	2.11552	3.03061	3.37283	1.99489
	35.4576	0.0149652		1.81379	2.13976	2.96201	3.43545	1.90887
	35.9576	-0.00939689		1.9221	2.13044	2.91265	3.57436	1.80632
	36.4576	-0.0324368		1.97603	2.12006	2.829	3.69073	1.70222
	36.9576	-0.05306		1.98029	2.10964	2.72021	3.79724	1.59896
	37.4576	-0.072175		1.93956	2.10019	2.59545	3.90656	1.49895
	37.9576	-0.0887092		1.85856	2.09274	2.46388	4.03138	1.40455
	38.4576	-0.101852		1.74198	2.08832	2.33466	4.18436	1.31815
	38.9576	-0.111332		1.59451	2.08794	2.21695	4.37818	1.24215
	39.4576	-0.116271		1.42087	2.09262	2.11992	4.62553	1.17892
	39.9576	-0.11637		1.22575	2.1034	2.05273	4.93906	1.13086
	40.4576	-0.111491		0.960452	2.22192	1.82786	5.1564	1.1337
	40.9576	-0.0999385		0.916451	2.10541	1.87857	6.09938	1.02226
	41.4576	-0.0831054		0.863054	2.00881	1.84513	6.60328	0.929377
	41.9576	-0.0626934		0.806815	1.93239	1.74709	6.76659	0.853616
	42.4576	-0.0395613		0.754283	1.8764	1.60397	6.68778	0.793531
	42.9576	-0.0149175		0.71201	1.84108	1.43531	6.46533	0.747681
	43.4576	0.0101285		0.686547	1.82669	1.26066	6.19771	0.714625
	43.9576	0.0340349		0.684446	1.83349	1.09955	5.9834	0.69292
	44.4576	0.0555422		0.712256	1.86173	0.971522	5.92088	0.681126
	44.9576	0.0743365		0.77653	1.91165	0.896107	6.10861	0.677801
	45.4576	0.0897329		0.835499	1.91781	0.907013	5.5126	0.664404
	45.9576	0.102564		0.92861	1.94845	0.897505	6.90655	0.677125
	46.4576	0.11197		0.991354	1.95768	0.943843	7.94054	0.688548
	46.9576	0.116712		1.03427	1.95194	1.02878	8.62213	0.703262
	47.4576	0.115887		1.06789	1.93767	1.13506	8.95887	0.725858
	47.9576	0.109588		1.10276	1.9213	1.24543	8.95832	0.760925
	48.4576	0.0980915		1.14942	1.90929	1.34266	8.62803	0.813054
	48.9576	0.0826289		1.21841	1.90807	1.40948	7.97555	0.886834
	49.4576	0.0623527		1.32026	1.92407	1.42866	7.00844	0.986855
	49.9576	0.0387353		1.46552	1.96375	1.38293	5.73425	1.11771
	50.4576	0.0138905		1.43559	1.94263	1.35273	4.9304	1.1974
	50.9576	-0.0102762		1.70267	1.87904	1.4266	4.90693	1.30819
	51.4576	-0.0331659		1.95835	1.80852	1.50573	4.80395	1.39248
	51.9576	-0.0534801		2.18464	1.7352	1.58548	4.64973	1.45356
	52.4576	-0.0722592		2.36357	1.6632	1.66118	4.47257	1.49476
	52.9576	-0.0884815		2.47713	1.59664	1.7282	4.30075	1.51937
	53.4576	-0.101355		2.50735	1.53965	1.78187	4.16254	1.5307
	53.9576	-0.110399		2.43625	1.49633	1.81756	4.08623	1.53207
	54.4576	-0.115307		2.24583	1.47082	1.83059	4.1001	1.52678
	54.9576	-0.115515		1.91811	1.46724	1.81633	4.23243	1.51814
	55.4576	-0.111075		1.78194	1.45733	1.94917	4.08814	1.5036
	55.9576	-0.0999205		1.63826	1.4432	1.9937	3.95019	1.49494
	56.4576	-0.0833662		1.53722	1.44008	2.02714	3.90289	1.47268
	56.9576	-0.0628741		1.46903	1.44538	2.04914	3.92795	1.44025
	57.4576	-0.0399205		1.42394	1.4565	2.05931	4.00706	1.40111
	57.9576	-0.0155601		1.39217	1.47084	2.05729	4.12195	1.3587
	58.4576	0.0091629		1.36397	1.48579	2.04271	4.25431	1.31646
	58.9576	0.0329029		1.32957	1.49875	2.01519	4.38585	1.27786
	59.4576	0.0543172		1.27921	1.50713	1.97437	4.49829	1.24633
	59.9576	0.0731612		1.20311	1.50831	1.91987	4.57332	1.22533
	60.4576	0.0884052		1.22469	1.51433	1.79928	4.50586	1.29702
	60.9576	0.101552		1.04647	1.48798	1.67651	4.36826	1.22062
	61.4576	0.11145		0.9245	1.4675	1.56968	4.17735	1.20033
	61.9576	0.116779		0.852282	1.45054	1.47836	3.96011	1.22302
	62.4576	0.116354		0.823321	1.43478	1.40209	3.7435	1.27555
	62.9576	0.110221		0.831121	1.41786	1.34044	3.5545	1.3448
	63.4576	0.0986358		0.869187	1.39746	1.29297	3.42007	1.41761
	63.9576	0.08301		0.931023	1.37124	1.25924	3.36718	1.48085
	64.4576	0.0624571		1.01013	1.33686	1.2388	3.4228	1.5214
	64.9576	0.0385447		1.10002	1.29198	1.23122	3.6139	1.5261
	65.4576	0.0137204		1.21207	1.29857	1.0993	3.64423	1.49213
	65.9576	-0.0107079		1.30557	1.26627	1.19839	3.83127	1.4342
	66.4576	-0.0339956		1.37882	1.27692	1.27346	3.86222	1.37587
	66.9576	-0.0545721		1.42749	1.31822	1.32501	3.77813	1.31719
	67.4576	-0.0734934		1.44725	1.37791	1.35356	3.62008	1.25822
	67.9576	-0.089691		1.43378	1.44373	1.35963	3.42912	1.19901
	68.4576	-0.102358		1.38275	1.5034	1.34372	3.24632	1.13959
	68.9576	-0.111448		1.28984	1.54465	1.30635	3.11276	1.08003
	69.4576	-0.115965		1.15072	1.55521	1.24803	3.06948	1.02037
	69.9576	-0.115629		0.961061	1.52281	1.16928	3.15756	0.960653
	70.4576	-0.110199		0.901583	1.52356	1.12226	3.11614	0.904696
	70.9576	-0.0983919		0.812073	1.50597	1.12794	3.17167	0.84447
	71.4576	-0.0814634		0.741251	1.47759	1.10687	3.2393	0.786679
	71.9576	-0.0612193		0.685251	1.44101	1.06507	3.31758	0.731705
	72.4576	-0.0383014		0.640209	1.39878	1.00857	3.40503	0.67993
	72.9576	-0.0138591		0.60226	1.35349	0.943396	3.50019	0.631738
	73.4576	0.0110264		0.567541	1.30772	0.875572	3.60158	0.58751
	73.9576	0.0342922		0.532187	1.26404	0.811124	3.70774	0.54763
	74.4576	0.0552682		0.492333	1.22503	0.75608	3.8172	0.512479
	74.9576	0.0735021		0.444115	1.19325	0.716464	3.92849	0.482441
	75.4576	0.0885992		0.461462	1.13501	0.658848	4.3265	0.440794
	75.9576	0.101525		0.357178	1.14828	0.674543	4.19243	0.415344
	76.4576	0.111278		0.307156	1.14633	0.665612	4.13332	0.390737
	76.9576	0.115999		0.301205	1.13242	0.637587	4.13351	0.367011
	77.4576	0.115351		0.329133	1.10978	0.596006	4.17731	0.344202
	77.9576	0.109341		0.380748	1.08167	0.546402	4.24907	0.322345
	78.4576	0.0982222		0.445859	1.05132	0.49431	4.33309	0.301476
	78.9576	0.0830544		0.514274	1.022	0.445265	4.41373	0.281631
	79.4576	0.0626863		0.575801	0.996947	0.404802	4.47529	0.262847
	79.9576	0.038756		0.620248	0.979404	0.378456	4.50211	0.245158
	80.4576	0.0145696		0.582772	0.880499	0.319808	4.26572	0.255087
	80.9576	-0.00942784		0.746074	0.873077	0.459373	4.50571	0.222211
	81.4576	-0.0322706		0.928171	0.834612	0.566346	4.70742	0.203796
	81.9576	-0.0525719		1.10981	0.773112	0.641941	4.87285	0.196813
	82.4576	-0.0715426		1.27174	0.696589	0.687374	5.00399	0.198235
	82.9576	-0.0879906		1.39471	0.613051	0.70386	5.10283	0.205034
	83.4576	-0.101059		1.45947	0.530508	0.692613	5.17136	0.214181
	83.9576	-0.110797		1.44677	0.456971	0.654848	5.21157	0.222648
	84.4576	-0.115998		1.33735	0.400448	0.59178	5.22547	0.227408
	84.9576	-0.116416		1.11196	0.36895	0.504625	5.21503	0.225432
	85.4576	-0.111899		0.915693	0.366349	0.558393	5.25296	0.200626
	85.9576	-0.100434		0.777555	0.382738	0.520803	5.56215	0.180244
	86.4576	-0.0835021		0.656705	0.38893	0.509839	5.70478	0.163034
	86.9576	-0.063204		0.551873	0.385992	0.516626	5.7153	0.149125
	87.4576	-0.0401035		0.461793	0.37499	0.532288	5.62812	0.138644
	87.9576	-0.0154354		0.385197	0.356988	0.547949	5.47765	0.13172
	88.4576	0.00965553		0.320816	0.333052	0.554733	5.29832	0.128481
	88.9576	0.0334531		0.267383	0.304247	0.543766	5.12454	0.129055
	89.4576	0.0547336		0.22363	0.27164	0.50617	4.99074	0.133572
	89.9576	0.0731181		0.188288	0.236295	0.433071	4.93134	0.142159
	90.4576	0.0885208		0.182718	0.234682	0.47011	4.86409	0.142034
	90.9576	0.101523		0.151046	0.205689	0.440333	4.67478	0.138466
	91.4576	0.111194		0.167809	0.188313	0.427713	4.54089	0.13387
	91.9576	0.116121		0.224298	0.180117	0.432432	4.45294	0.128112
	92.4576	0.115476		0.311809	0.178667	0.454671	4.40146	0.12106
	92.9576	0.109366		0.421634	0.181526	0.494612	4.37696	0.112581
	93.4576	0.0981277		0.545066	0.186259	0.552437	4.36996	0.102543
	93.9576	0.0827466		0.673401	0.190432	0.628326	4.371	0.0908131
	94.4576	0.0623262		0.79793	0.191608	0.722462	4.37057	0.0772583
	94.9576	0.038475		0.909947	0.187351	0.835026	4.35922	0.061746
	95.4576	0.0137503		0.876153	0.189835	1.32439	4.14404	0.0610404
	95.9576	-0.0104343		1.08762	0.173498	1.05514	4.04931	0.0543323
	96.4576	-0.0332114		1.2399	0.159877	0.949542	4.07012	0.0507743
	96.9576	-0.0534208		1.33694	0.14871	0.977883	4.17715	0.0498894
	97.4576	-0.0721368		1.38272	0.139733	1.11046	4.34107	0.0512004
	97.9576	-0.0882827		1.3812	0.132684	1.31756	4.53257	0.0542302
	98.4576	-0.101085		1.33633	0.127301	1.56947	4.7223	0.0585017
	98.9576	-0.110309		1.25208	0.123318	1.83649	4.88096	0.0635376
	99.4576	-0.115231		1.1324	0.120475	2.0889	4.9792	0.068861
	99.9576	-0.115588		0.98127	0.118507	2.297	4.98772	0.0739946
	100.458	-0.110814		0.896384	0.0909824	2.46003	4.90715	0.0453757
	100.958	-0.0994432		0.785939	0.0806945	2.32899	4.87524	0.0644788
	101.458	-0.0828491		0.690279	0.069523	2.18241	4.84011	0.0744249
	101.958	-0.0626931		0.609167	0.0583306	2.03273	4.8039	0.0778355
	102.458	-0.0398978		0.542363	0.04798	1.89238	4.76876	0.0773326
	102.958	-0.0155957		0.489628	0.0393339	1.77383	4.73682	0.0755377
	103.458	0.00915		0.450724	0.0332551	1.68952	4.71024	0.0750727
	103.958	0.0324457		0.425412	0.0306063	1.6519	4.69114	0.0785592
	104.458	0.0535022		0.413454	0.0322502	1.6734	4.68169	0.088619
	104.958	0.0719819		0.414611	0.0390496	1.76648	4.68401	0.107874
	105.458	0.0874097		0.400506	0.054641	1.83365	4.47405	0.188091
	105.958	0.100721		0.354667	0.0413933	1.80229	4.46985	0.289126
	106.458	0.110851		0.330714	0.0352065	1.80499	4.45661	0.361232
	106.958	0.116023		0.331142	0.0349872	1.83216	4.45069	0.408246
	107.458	0.115688		0.358443	0.0396416	1.8742	4.46847	0.434006
	107.958	0.109872		0.415111	0.0480762	1.92152	4.52628	0.44235
	108.458	0.09884		0.503638	0.0591972	1.96453	4.64049	0.437116
	108.958	0.0836011		0.626518	0.071911	1.99362	4.82747	0.422141
	109.458	0.063325		0.786245	0.085124	1.9992	5.10357	0.401263
	109.958	0.0397068		0.985312	0.0977426	1.97169	5.48515	0.37832
	110.458	0.0148696		0.934977	0.131219	1.93424	4.95295	0.398162
	110.958	-0.00946184		1.30766	0.100306	1.85708	6.47717	0.349353
	111.458	-0.0325065		1.5828	0.0740462	1.83817	7.60226	0.308532
	111.958	-0.0531121		1.7685	0.0525921	1.86383	8.38542	0.275583
	112.458	-0.0723315		1.87286	0.0360962	1.92036	8.88384	0.250388
	112.958	-0.0890612		1.90397	0.0247114	1.99408	9.15473	0.232831
	113.458	-0.102513		1.86993	0.0185902	2.07131	9.25528	0.222794
	113.958	-0.11169		1.77884	0.0178854	2.13835	9.24268	0.220162
	114.458	-0.116494		1.63881	0.0227494	2.18151	9.17413	0.224816
	114.958	-0.116529		1.45793	0.033335	2.18711	9.10684	0.236639
	115.458	-0.111704		1.08811	0.0772631	2.17497	9.15191	0.327759
	115.958	-0.100071		1.08605	0.0590702	2.15044	9.83614	0.252812
	116.458	-0.0832115		1.06383	0.0433474	2.17599	10.3272	0.215205
	116.958	-0.0622258		1.03532	0.0372485	2.25452	10.6538	0.208926
	117.458	-0.0388347		1.01439	0.0479271	2.38894	10.8447	0.227965
	117.958	-0.0141833		1.0149	0.082537	2.58215	10.9286	0.266308
	118.458	0.0106696		1.05074	0.148232	2.83703	10.9342	0.317946
	118.958	0.034371		1.13577	0.252166	3.15651	10.8901	0.376866
	119.458	0.0556835		1.28388	0.401492	3.54347	10.8252	0.437057
	119.958	0.0745185		1.50892	0.603364	4.00081	10.7681	0.492508
	120.458	0.0896667		1.72985	0.734068	4.4541	10.8799	0.507393
	120.958	0.102579		1.90298	0.905821	5.0619	11.6119	0.418456
	121.458	0.112196		2.01781	1.04911	5.62408	11.8418	0.381332
	121.958	0.117221		2.08483	1.16547	6.11929	11.6595	0.386714
	122.458	0.116533		2.11453	1.25646	6.52617	11.1552	0.425294
	122.958	0.110217		2.1174	1.32363	6.82335	10.4187	0.487763
	123.458	0.0985414		2.10392	1.36852	6.98948	9.54008	0.564813
	123.958	0.0826795		2.08457	1.39269	7.0032	8.60932	0.647137
	124.458	0.0620356		2.06984	1.39769	6.84314	7.7164	0.725425
	124.958	0.0382185		2.07022	1.38505	6.48795	6.95133	0.79037
	125.458	0.0132272		2.01249	1.37914	6.14219	6.45066	0.856092
	125.958	-0.0110053		2.13672	1.38733	5.81761	5.6377	0.988769
	126.458	-0.0339512		2.17505	1.385	5.51371	5.24681	1.11441
	126.958	-0.0544579		2.1411	1.37716	5.22185	5.19872	1.22818
	127.458	-0.0734203		2.04847	1.36881	4.93338	5.4142	1.32521
	127.958	-0.0898082		1.91079	1.36495	4.63965	5.81397	1.40066
	128.458	-0.102832		1.74165	1.37058	4.33201	6.31878	1.44968
	128.958	-0.111914		1.55468	1.39071	4.00182	6.84938	1.46742
	129.458	-0.116642		1.36348	1.43034	3.64043	7.32651	1.44903
	129.958	-0.116464		1.18167	1.49448	3.2392	7.67091	1.38966
	130.458	-0.112022		1.01121	1.50919	2.75321	7.40354	1.31854
	130.958	-0.100539		0.921523	1.60791	2.60582	7.88604	1.23256
	131.458	-0.0835984		0.858961	1.68919	2.47469	8.81112	1.1507
	131.958	-0.0627697		0.817082	1.75203	2.35348	10.0591	1.07227
	132.458	-0.0395667		0.789447	1.79542	2.23587	11.5101	0.996604
	132.958	-0.01514		0.769616	1.81836	2.11551	13.0446	0.923004
	133.458	0.00943758		0.751151	1.81984	1.98608	14.5428	0.85079
	133.958	0.0334997		0.727611	1.79885	1.84124	15.8849	0.779277
	134.458	0.0548481		0.692558	1.75438	1.67467	16.9513	0.707781
	134.958	0.0735534		0.639551	1.68544	1.48002	17.6221	0.635618
	135.458	0.0890555		0.61871	1.56184	1.34844	16.5638	0.599949
	135.958	0.102197		0.529337	1.58205	1.15895	15.8788	0.547479
	136.458	0.111981		0.547103	1.59073	1.04356	14.9748	0.52226
	136.958	0.117831		0.649254	1.59063	0.992512	13.9001	0.518024
	137.458	0.117656		0.813031	1.58448	0.996012	12.7031	0.528506
	137.958	0.111649		1.01568	1.57503	1.04428	11.4322	0.547438
	138.458	0.100118		1.23444	1.56502	1.12753	10.1357	0.568554
	138.958	0.0841797		1.44656	1.55719	1.23599	8.86199	0.585588
	139.458	0.0636805		1.62927	1.55426	1.35986	7.65943	0.592273
	139.958	0.0401368		1.75983	1.559	1.48938	6.5764	0.582342
	140.458	0.0146528		1.84306	1.57246	1.62475	5.29614	0.593349
	140.958	-0.00972331		1.96671	1.57219	1.7147	5.44682	0.621436
	141.458	-0.0327116		2.07109	1.53953	1.81773	5.37074	0.684051
	141.958	-0.0534173		2.15161	1.48325	1.92371	5.11497	0.771139
	142.458	-0.0724109		2.20371	1.41211	2.02251	4.72662	0.872646
	142.958	-0.08879		2.22281	1.33487	2.10401	4.25279	0.97852
	143.458	-0.10183		2.20434	1.2603	2.15807	3.74057	1.07871
	143.958	-0.110881		2.14374	1.19716	2.17457	3.23706	1.16315
	144.458	-0.11579		2.03642	1.15422	2.14337	2.78935	1.2218
	144.958	-0.115982		1.87782	1.14024	2.05435	2.44454	1.2446
	145.458	-0.110777		1.54991	1.15474	1.77934	2.60699	1.31745
	145.958	-0.0993491		1.49201	1.14544	1.76433	2.27248	1.21014
	146.458	-0.0828426		1.41356	1.14614	1.7276	2.12416	1.14536
	146.958	-0.0623802		1.3222	1.15483	1.67228	2.13102	1.11334
	147.458	-0.0394786		1.22558	1.16951	1.60146	2.26204	1.10429
	147.958	-0.0151376		1.13136	1.18818	1.51827	2.48622	1.10846
	148.458	0.00964802		1.04717	1.20883	1.4258	2.77255	1.11605
	148.958	0.0329881		0.980675	1.22945	1.32716	3.09001	1.11729
	149.458	0.054138		0.939518	1.24805	1.22547	3.4076	1.1024
	149.958	0.0726805		0.931349	1.26261	1.12383	3.6943	1.06161
	150.458	0.0877373		0.955353	1.25567	1.05149	2.40348	0.968778
	150.958	0.100816		0.931086	1.29454	1.05463	3.91659	0.945559
	151.458	0.11082		0.942302	1.34038	1.07986	4.98141	0.937642
	151.958	0.115925		0.978914	1.38804	1.12024	5.6393	0.937513
	152.458	0.115617		1.03084	1.43236	1.16883	5.93163	0.937658
	152.958	0.109874		1.08798	1.46819	1.21867	5.89977	0.93056
	153.458	0.0989264		1.14026	1.49038	1.26282	5.5851	0.908705
	153.958	0.0836938		1.17758	1.49376	1.29434	5.02897	0.864579
	154.458	0.0633595		1.18986	1.47319	1.30627	4.27276	0.790666
	154.958	0.0394476		1.16702	1.42351	1.29168	3.35784	0.679451
	155.458	0.0144707		1.08205	1.38467	1.27032	3.51174	0.616846
	155.958	-0.00994168		1.10533	1.40131	1.25818	3.60569	0.606183
	156.458	-0.0330005		1.11606	1.41087	1.23244	3.67661	0.585489
	156.958	-0.0535622		1.11013	1.41104	1.19223	3.72543	0.556729
	157.458	-0.0725576		1.08345	1.39949	1.13664	3.75306	0.521869
	157.958	-0.0889138		1.03189	1.37387	1.06481	3.76044	0.482877
	158.458	-0.101817		0.951368	1.33186	0.975843	3.74847	0.441717
	158.958	-0.110721		0.837767	1.27113	0.868856	3.71808	0.400356
	159.458	-0.115519		0.686985	1.18934	0.742964	3.67019	0.36076
	159.958	-0.115765		0.494917	1.08418	0.597283	3.60573	0.324894
	160.458	-0.110897		0.422073	1.02154	0.499888	3.559	0.29706
	160.958	-0.0993963		0.334516	0.957277	0.420243	3.57767	0.272855
	161.458	-0.0825733		0.265376	0.905238	0.346288	3.59474	0.253228
	161.958	-0.0617982		0.212587	0.862206	0.278287	3.60588	0.237225
	162.458	-0.0386721		0.174081	0.82496	0.216501	3.60673	0.223894
	162.958	-0.0142508		0.147792	0.79028	0.161193	3.59293	0.21228
	163.458	0.0104462		0.131651	0.754946	0.112623	3.56015	0.20143
	163.958	0.0337047		0.123593	0.715737	0.0710532	3.50401	0.19039
	164.458	0.054709		0.121549	0.669433	0.0367462	3.42019	0.178208
	164.958	0.0732433		0.123452	0.612814	0.00996335	3.30431	0.16393
	165.458	0.0882266		0.14245	0.568145	0.111853	3.94414	0.141551
	165.958	0.101298		0.150161	0.462299	0.0180599	3.21819	0.15593
	166.458	0.111283		0.179474	0.386179	0	2.97228	0.171481
	166.958	0.116429		0.226097	0.335994	0.0455291	3.08716	0.191839
	167.458	0.116		0.285735	0.30795	0.142503	3.44354	0.220637
	167.958	0.109977		0.354096	0.298256	0.278779	3.92218	0.261507
	168.458	0.0985482		0.426888	0.303119	0.442211	4.40381	0.318082
	168.958	0.0830684		0.499817	0.318746	0.620658	4.76916	0.393997
	169.458	0.0626457		0.56859	0.341346	0.801974	4.89896	0.492883
	169.958	0.0388988		0.628915	0.367125	0.974015	4.67396	0.618375
	170.458	0.0140188		0.562049	0.367169	1.30995	3.86709	0.757006
	170.958	-0.0104204		0.841491	0.37723	1.19486	3.41143	0.905349
	171.458	-0.0337591		1.07992	0.363435	1.15832	3.0996	1.04104
	171.958	-0.0544996		1.27345	0.335048	1.18654	2.91028	1.16132
	172.458	-0.0737234		1.41816	0.301333	1.26576	2.82216	1.26341
	172.958	-0.0903323		1.51016	0.271554	1.38222	2.81393	1.34454
	173.458	-0.103508		1.54554	0.254977	1.52213	2.86428	1.40194
	173.958	-0.1125		1.52042	0.260864	1.67173	2.9519	1.43284
	174.458	-0.117033		1.43087	0.298482	1.81726	3.05548	1.43447
	174.958	-0.116709		1.27301	0.377094	1.94494	3.1537	1.40406
	175.458	-0.111217		1.19773	0.419678	2.10528	3.34883	1.36353
	175.958	-0.099387		1.35128	0.544637	2.13335	3.55701	1.21779
	176.458	-0.082521		1.40719	0.661608	2.26736	3.71735	1.11039
	176.958	-0.0617741		1.38657	0.770786	2.48364	3.84611	1.03499
	177.458	-0.0385598		1.31052	0.872366	2.75851	3.95954	0.985245
	177.958	-0.0139547		1.20014	0.966541	3.06827	4.07389	0.954804
	178.458	0.0110251		1.07654	1.05351	3.38924	4.20541	0.937322
	178.958	0.0343943		0.960818	1.13346	3.69775	4.37036	0.926452
	179.458	0.0556703		0.874081	1.20659	3.9701	4.58498	0.915846
	179.958	0.0744409		0.837433	1.2731	4.18262	4.86553	0.899158
	180.458	0.0894834		0.891516	1.32067	4.91268	5.99472	0.921869
	180.958	0.102397		1.07956	1.3528	4.5786	5.82184	0.859964
	181.458	0.112126		1.23633	1.35419	4.34659	5.95336	0.813906
	181.958	0.11678		1.36168	1.33111	4.20423	6.32753	0.78087
	182.458	0.1161		1.45544	1.2898	4.13908	6.88263	0.758031
	182.958	0.110035		1.51746	1.23654	4.13874	7.5569	0.742565
	183.458	0.0987891		1.54759	1.17759	4.19077	8.28861	0.731645
	183.958	0.0835521		1.54566	1.1192	4.28276	9.01602	0.722449
	184.458	0.0632689		1.51152	1.06764	4.40228	9.6774	0.712152
	184.958	0.0395209		1.44501	1.02917	4.5369	10.211	0.697927
	185.458	0.0148404		1.19845	0.961001	4.60101	11.0553	0.691652
	185.958	-0.00950737		1.3532	0.890946	4.80695	10.7402	0.680728
	186.458	-0.0326858		1.40079	0.823999	4.93443	10.623	0.657531
	186.958	-0.0532411		1.36752	0.764638	4.99075	10.6658	0.628445
	187.458	-0.0723315		1.27966	0.717339	4.98319	10.8302	0.599854
	187.958	-0.0888459		1.16352	0.68658	4.91905	11.0782	0.578145
	188.458	-0.101976		1.04538	0.676836	4.80561	11.3716	0.569702
	188.958	-0.111071		0.951538	0.692585	4.65017	11.6722	0.580909
	189.458	-0.115893		0.908273	0.738304	4.46001	11.942	0.618154
	189.958	-0.116023		0.941879	0.818469	4.24242	12.1426	0.687819
	190.458	-0.111209		0.964605	0.866491	4.10275	12.0633	0.836123
	190.958	-0.099873		1.0583	0.960454	4.38303	11.6737	0.761134
	191.458	-0.0833215		1.09313	1.03619	4.65376	11.5228	0.706289
	191.958	-0.0628089		1.08987	1.09666	4.91789	11.5293	0.670347
	192.458	-0.0397923		1.06927	1.14479	5.17833	11.6122	0.652071
	192.958	-0.0153373		1.05208	1.18355	5.43802	11.69	0.65022
	193.458	0.00950677		1.05906	1.21587	5.69989	11.6818	0.663555
	193.958	0.0329552		1.11097	1.2447	5.96686	11.5061	0.690837
	194.458	0.0542226		1.22856	1.27298	6.24186	11.0818	0.730826
	194.958	0.0728537		1.4326	1.30368	6.52783	10.3278	0.782284
	195.458	0.0880163		1.30279	1.31425	6.70105	9.63954	0.829933
	195.958	0.101147		1.40668	1.31026	6.89126	8.74014	0.873535
	196.458	0.111094		1.49957	1.30265	6.89964	7.90405	0.928479
	196.958	0.116149		1.58349	1.29268	6.75945	7.13377	0.991314
	197.458	0.115784		1.66046	1.28158	6.50395	6.43183	1.05859
	197.958	0.109978		1.73252	1.27058	6.16639	5.80075	1.12685
	198.458	0.0989974		1.80168	1.26093	5.78003	5.24303	1.19264
	198.958	0.0837398		1.86998	1.25387	5.37814	4.7612	1.25252
	199.458	0.0633402		1.93944	1.25064	4.99398	4.35777	1.30303
	199.958	0.0394345		2.01209	1.25246	4.6608	4.03526	1.34072
	200.458	0.0142524		1.92914	1.21034	4.28372	3.6613	1.36443
	200.958	-0.010325		2.18837	1.24985	4.17926	3.39919	1.32813
	201.458	-0.033469		2.36921	1.28157	4.10658	3.28414	1.31162
	201.958	-0.0540887		2.4795	1.30566	4.05345	3.29477	1.31043
	202.458	-0.0732216		2.52703	1.32228	4.00765	3.40967	1.32014
	202.958	-0.089772		2.51962	1.33161	3.95694	3.60745	1.33629
	203.458	-0.102919		2.46509	1.33379	3.8891	3.86673	1.35444
	203.958	-0.111867		2.37124	1.329	3.79189	4.16611	1.37015
	204.458	-0.116635		2.2459	1.31741	3.6531	4.4842	1.37897
	204.958	-0.116688		2.09686	1.29916	3.46049	4.7996	1.37647
	205.458	-0.111868		1.91815	1.31357	3.29581	5.67628	1.32614
	205.958	-0.100291		1.76261	1.36716	3.20904	5.88439	1.29044
	206.458	-0.0833447		1.63937	1.46253	3.10305	6.08243	1.23929
	206.958	-0.0622478		1.54436	1.58613	2.98243	6.27856	1.17792
	207.458	-0.0388442		1.4735	1.72443	2.85177	6.48094	1.11157
	207.958	-0.0142298		1.42272	1.86389	2.71566	6.69774	1.04548
	208.458	0.0104954		1.38793	1.99096	2.57869	6.93712	0.984893
	208.958	0.034069		1.36505	2.0921	2.44545	7.20724	0.935037
	209.458	0.0553531		1.35001	2.15378	2.32054	7.51627	0.901153
	209.958	0.0740674		1.33874	2.16246	2.20855	7.87237	0.888478
	210.458	0.0890836		1.29767	2.19327	2.08704	7.95229	0.850359
	210.958	0.102128		1.22264	2.19614	2.06664	8.3421	0.816776
	211.458	0.111876		1.13619	2.17885	2.01251	8.76074	0.776194
	211.958	0.117015		1.04868	2.14586	1.93263	9.17767	0.730337
	212.458	0.116528		0.970455	2.10162	1.83501	9.56234	0.680928
	212.958	0.110431		0.91185	2.05059	1.72763	9.88421	0.629692
	213.458	0.0989921		0.883211	1.99723	1.61849	10.1127	0.578352
	213.958	0.0834078		0.894884	1.946	1.51557	10.2174	0.528632
	214.458	0.0628946		0.957213	1.90136	1.42686	10.1676	0.482255
	214.958	0.03922		1.08054	1.86776	1.36035	9.9329	0.440946
	215.458	0.0144573		1.20166	1.92442	1.44345	9.96464	0.406614
	215.958	-0.00968223		1.29157	2.00575	1.67	9.81514	0.358253
	216.458	-0.0325444		1.39299	2.03505	1.83843	9.63505	0.336801
	216.958	-0.0529016		1.49804	2.02112	1.95879	9.41585	0.338267
	217.458	-0.0718631		1.59884	1.97279	2.04114	9.14903	0.358661
	217.958	-0.0883432		1.6875	1.89886	2.09552	8.82607	0.393991
	218.458	-0.101529		1.75614	1.80815	2.13199	8.43844	0.440266
	218.958	-0.110944		1.79686	1.70948	2.16058	7.97765	0.493495
	219.458	-0.116068		1.80179	1.61165	2.19135	7.43516	0.549687
	219.958	-0.116374		1.76304	1.52349	2.23435	6.80247	0.604851
	220.458	-0.111964		1.57307	1.44631	2.16572	6.53832	0.67955
	220.958	-0.100555		1.58914	1.38529	2.49368	5.24869	0.686438
	221.458	-0.0836551		1.57449	1.32661	2.71002	4.54396	0.682463
	221.958	-0.0628929		1.53497	1.27237	2.83089	4.28456	0.672433
	222.458	-0.0396364		1.47642	1.2247	2.87242	4.33089	0.661153
	222.958	-0.0150321		1.40469	1.18572	2.85076	4.54336	0.653432
	223.458	0.00982066		1.32563	1.15755	2.78207	4.78241	0.654076
	223.958	0.0336483		1.24509	1.14232	2.68248	4.90843	0.667893
	224.458	0.0549076		1.16891	1.14214	2.56814	4.78185	0.699689
	224.958	0.0734223		1.10295	1.15914	2.45519	4.26308	0.754272
	225.458	0.0885292		1.08915	1.14374	2.37447	4.11366	0.801359
	225.958	0.10159		1.03562	1.17055	2.41213	3.4138	0.860191
	226.458	0.11143		1.01556	1.17778	2.38387	3.00714	0.885652
	226.958	0.116822		1.02455	1.17081	2.30774	2.8376	0.885219
	227.458	0.116389		1.05814	1.15505	2.2018	2.84911	0.866369
	227.958	0.11024		1.11192	1.13587	2.08413	2.9856	0.83658
	228.458	0.0987105		1.18145	1.11867	1.97276	3.19097	0.803326
	228.958	0.0830138		1.2623	1.10883	1.88577	3.40916	0.774087
	229.458	0.0623482		1.35004	1.11175	1.84122	3.58409	0.756337
	229.958	0.0384975		1.44023	1.1328	1.85715	3.65967	0.757555
	230.458	0.0129684		1.52354	1.16921	1.88574	4.09423	0.782132
	230.958	-0.0114209		1.72256	1.18818	2.00775	4.50643	0.790519
	231.458	-0.0341848		1.82804	1.2076	2.08387	5.01908	0.776508
	231.958	-0.0542681		1.85272	1.22796	2.11897	5.59729	0.745471
	232.458	-0.0729387		1.80936	1.24978	2.11794	6.20621	0.70278
	232.958	-0.0891886		1.71072	1.27356	2.08566	6.81095	0.653807
	233.458	-0.102262		1.56953	1.29981	2.02701	7.37665	0.603926
	233.958	-0.1111		1.39856	1.32903	1.94687	7.86843	0.558508
	234.458	-0.115834		1.21056	1.36174	1.85012	8.25142	0.522925
	234.958	-0.115781		1.01828	1.39843	1.74164	8.49075	0.502551
	235.458	-0.110962		0.934159	1.33053	1.59546	8.21288	0.502652
	235.958	-0.0994969		0.724386	1.43213	1.5709	8.70199	0.495951
	236.458	-0.0828139		0.563709	1.49511	1.53435	9.06453	0.484602
	236.958	-0.0618877		0.444377	1.52423	1.48553	9.31926	0.468875
	237.458	-0.038732		0.358638	1.52428	1.42414	9.48494	0.449039
	237.958	-0.0143927		0.298742	1.50002	1.34987	9.58032	0.425363
	238.458	0.0100681		0.256938	1.45624	1.26243	9.62415	0.398117
	238.958	0.0334579		0.225475	1.39772	1.16152	9.6352	0.367571
	239.458	0.0547364		0.196602	1.32923	1.04684	9.6322	0.333994
	239.958	0.0736274		0.162568	1.25554	0.918095	9.63393	0.297655
	240.458	0.0887606		0.230727	1.24384	0.826923	9.27819	0.294254
	240.958	0.101857		0.160531	1.16437	0.711687	9.84153	0.24829
	241.458	0.111591		0.170457	1.15305	0.637174	10.1278	0.209277
	241.958	0.116687		0.243839	1.19209	0.598551	10.1961	0.177154
	242.458	0.116196		0.364013	1.26373	0.590991	10.1058	0.151861
	242.958	0.110111		0.514315	1.35019	0.60966	9.91605	0.133337
	243.458	0.0986879		0.678081	1.4337	0.649731	9.68605	0.121521
	243.958	0.083068		0.838647	1.49649	0.706372	9.47503	0.116351
	244.458	0.0625876		0.979348	1.52079	0.774753	9.34221	0.117767
	244.958	0.0389057		1.08352	1.48882	0.850045	9.3468	0.125709
	245.458	0.0139254		1.0776	1.38867	0.978377	9.28352	0.0825267
	245.958	-0.0105422		1.19226	1.24402	1.06973	9.59982	0.0975984
	246.458	-0.0337551		1.2885	1.12486	1.16996	9.66455	0.101599
	246.958	-0.0544445		1.3635	1.02964	1.27591	9.61023	0.0966855
	247.458	-0.0735079		1.41443	0.956802	1.38444	9.56934	0.0850128
	247.958	-0.0898793		1.43846	0.904771	1.49242	9.6744	0.0687375
	248.458	-0.102752		1.43277	0.871988	1.59668	10.0579	0.0500156
	248.958	-0.111606		1.39454	0.856886	1.6941	10.8524	0.031003
	249.458	-0.116157		1.32094	0.857904	1.78152	12.1903	0.0138559
	249.958	-0.11599		1.20914	0.873477	1.85581	14.2041	0.000730319
	250.458	-0.111016		1.13891	0.838259	1.98904	14.9992	0
	250.958	-0.0994772		1.01731	0.778168	2.12252	16.0385	0.0155345
	251.458	-0.0826496		0.934597	0.723533	2.28596	16.7474	0.0309883
	251.958	-0.0619092		0.883907	0.674023	2.47166	17.1889	0.0463978
	252.458	-0.0386777		0.858387	0.629302	2.67189	17.426	0.0618
	252.958	-0.0140572		0.851178	0.589038	2.87896	17.5217	0.0772314
	253.458	0.0108777		0.855422	0.552895	3.08514	17.539	0.0927287
	253.958	0.0346216		0.864261	0.520542	3.28273	17.5407	0.108329
	254.458	0.0559332		0.870838	0.491643	3.46402	17.59	0.124068
	254.958	0.0744116		0.868296	0.465864	3.62128	17.7498	0.139983
	255.458	0.0894172		1.06983	0.442365	4.70145	16.5323	0.0510664
	255.958	0.102196		0.78583	0.477758	3.89247	17.8816	0.167512
	256.458	0.111719		0.642148	0.524662	3.5222	18.3234	0.236739
	256.958	0.116665		0.61204	0.578709	3.50921	18.0221	0.269924
	257.458	0.116111		0.668757	0.635533	3.77208	17.1423	0.278245
	257.958	0.11011		0.785552	0.690767	4.22937	15.8487	0.27288
	258.458	0.0989503		0.935679	0.740044	4.79965	14.3057	0.265006
	258.958	0.0835179		1.09239	0.778997	5.4015	12.678	0.265802
	259.458	0.0631217		1.22894	0.803259	5.95349	11.1302	0.286443
	259.958	0.0392852		1.31857	0.808462	6.37418	9.82667	0.338109
	260.458	0.0140945		1.36671	0.873402	6.58795	8.22215	0.411009
	260.958	-0.0102942		1.41097	0.820425	6.31398	6.85918	0.467625
	261.458	-0.0332098		1.50596	0.796335	6.06818	5.64937	0.539139
	261.958	-0.0536767		1.62906	0.794577	5.84087	4.60576	0.620096
	262.458	-0.0725922		1.75766	0.808599	5.6224	3.74134	0.705044
	262.958	-0.0889333		1.86916	0.831847	5.4031	3.06914	0.78853
	263.458	-0.101901		1.94095	0.85777	5.1733	2.60218	0.865101
	263.958	-0.110955		1.9504	0.879814	4.92333	2.35347	0.929304
	264.458	-0.116016		1.87492	0.891425	4.64353	2.33602	0.975687
	264.958	-0.116485		1.6919	0.886052	4.32424	2.56286	0.998797
	265.458	-0.111979		1.52856	0.914487	4.06808	2.35029	1.02557
	265.958	-0.100663		1.32386	0.947943	3.65762	2.54268	0.968778
	266.458	-0.0838751		1.16581	0.957086	3.3241	3.09573	0.928576
	266.958	-0.0630439		1.04858	0.949352	3.05687	3.90501	0.902186
	267.458	-0.0398962		0.966343	0.932175	2.84529	4.86606	0.886833
	267.958	-0.0154759		0.913282	0.912991	2.67873	5.87445	0.879741
	268.458	0.00917435		0.883571	0.899233	2.54653	6.82573	0.878136
	268.958	0.0326988		0.871384	0.898337	2.43805	7.61547	0.879241
	269.458	0.0539402		0.870898	0.917738	2.34266	8.13923	0.880282
	269.958	0.0727684		0.876288	0.96487	2.24971	8.29256	0.878484
	270.458	0.0882302		1.00554	1.14528	2.02077	7.35437	0.894386
	270.958	0.101753		0.93265	1.14888	2.02483	7.66688	0.802639
	271.458	0.112031		0.886824	1.15794	2.00664	7.9564	0.730443
	271.958	0.117584		0.865415	1.16932	1.96775	8.21414	0.673457
	272.458	0.117273		0.865771	1.1799	1.90969	8.4313	0.627336
	272.958	0.111125		0.885239	1.18654	1.83401	8.59911	0.587739
	273.458	0.0993707		0.921168	1.18611	1.74223	8.70876	0.550324
	273.958	0.0833578		0.970904	1.17547	1.63591	8.75146	0.510747
	274.458	0.062554		1.0318	1.1515	1.51657	8.71842	0.464667
	274.958	0.038681		1.10119	1.11106	1.38576	8.60086	0.407739
	275.458	0.0136031		1.05089	1.06689	1.3305	8.6443	0.343559
	275.958	-0.0106554		1.33285	1.01137	1.17147	8.33462	0.296742
	276.458	-0.0336735		1.54693	0.970882	1.05975	8.09638	0.268178
	276.958	-0.0542108		1.69847	0.942632	0.987925	7.91343	0.255274
	277.458	-0.0732085		1.79278	0.923829	0.948583	7.76962	0.255439
	277.958	-0.0896527		1.83519	0.911682	0.934314	7.6488	0.266082
	278.458	-0.102769		1.831	0.903398	0.937706	7.53483	0.284611
	278.958	-0.111793		1.78556	0.896184	0.951347	7.41154	0.308433
	279.458	-0.116494		1.70416	0.88725	0.967826	7.2628	0.334959
	279.958	-0.116249		1.59214	0.873802	0.979731	7.07246	0.361595
	280.458	-0.110575		1.44095	0.880523	1.0961	6.305	0.392795
	280.958	-0.0987173		1.38718	0.838984	1.04524	6.38002	0.460932
	281.458	-0.0819169		1.33265	0.806521	1.04798	6.35279	0.543252
	281.958	-0.061288		1.27753	0.781715	1.09047	6.2346	0.632385
	282.458	-0.0383494		1.22196	0.763148	1.15887	6.03673	0.720959
	282.958	-0.0140885		1.1661	0.7494	1.23933	5.77045	0.801604
	283.458	0.0104991		1.11009	0.739054	1.31801	5.44704	0.866947
	283.958	0.0334955		1.05408	0.730691	1.38106	5.07779	0.909619
	284.458	0.0546418		0.998232	0.722891	1.41464	4.67398	0.922246
	284.958	0.0734716		0.94269	0.714237	1.40488	4.24688	0.89746
	285.458	0.0883989		0.88206	0.729006	1.44039	4.3759	0.91604
	285.958	0.101342		0.82978	0.715933	1.23543	4.05958	0.875613
	286.458	0.111075		0.778271	0.699051	1.09483	3.86549	0.858329
	286.958	0.115645		0.73114	0.678657	1.00824	3.77237	0.862147
	287.458	0.114945		0.691997	0.655049	0.965298	3.75892	0.885024
	287.958	0.108854		0.66445	0.628528	0.955661	3.80388	0.92492
	288.458	0.0975406		0.652106	0.59939	0.968977	3.88596	0.979792
	288.958	0.0824462		0.658574	0.567934	0.994897	3.98387	1.0476
	289.458	0.0621952		0.687464	0.53446	1.02307	4.07634	1.1263
	289.958	0.0383034		0.742382	0.499264	1.04315	4.14208	1.21385
	290.458	0.0135009		0.481996	0.360995	0.993563	4.33991	1.38036
	290.958	-0.0108623		0.999218	0.402802	0.93316	4.29933	1.34748
	291.458	-0.0339875		1.39748	0.431647	0.942847	4.21318	1.36144
	291.958	-0.0541487		1.68257	0.44837	1.00572	4.09123	1.41138
	292.458	-0.0727856		1.8603	0.45381	1.10488	3.94327	1.48644
	292.958	-0.088794		1.93644	0.448806	1.22342	3.77905	1.57577
	293.458	-0.101311		1.91679	0.434197	1.34444	3.60835	1.66851
	293.958	-0.109908		1.80716	0.410821	1.45104	3.44093	1.75381
	294.458	-0.114579		1.61332	0.379518	1.52631	3.28656	1.82081
	294.958	-0.114704		1.34108	0.341128	1.55335	3.15501	1.85866
	295.458	-0.110285		1.0608	0.257514	1.45238	3.21805	1.79758
	295.958	-0.0991291		0.880876	0.2486	1.56086	3.1718	1.82598
	296.458	-0.0824195		0.732584	0.232136	1.62411	3.11331	1.86319
	296.958	-0.0616322		0.613558	0.211663	1.65881	3.04873	1.9031
	297.458	-0.0385254		0.521429	0.190723	1.68165	2.98421	1.93964
	297.958	-0.0141004		0.45383	0.172859	1.70934	2.9259	1.9667
	298.458	0.0105992		0.408395	0.161612	1.75856	2.87995	1.97818
	298.958	0.033943		0.382755	0.160524	1.84599	2.8525	1.96799
	299.458	0.0549888		0.374543	0.173138	1.98834	2.84971	1.93004
	299.958	0.0733402		0.381392	0.202996	2.2023	2.87773	1.85822
	300.458	0.0881518		0.438913	0.200976	2.28328	2.90346	1.8035
	300.958	0.101235		0.42627	0.216309	2.50337	3.0425	1.80439
	301.458	0.111247		0.42944	0.223511	2.53579	3.10351	1.79779
	301.958	0.116478		0.447808	0.223529	2.42922	3.10521	1.78427
	302.458	0.116129		0.480762	0.217312	2.23237	3.06632	1.76442
	302.958	0.110167		0.527686	0.205807	1.99392	3.00556	1.73882
	303.458	0.0988382		0.587967	0.189963	1.76257	2.94165	1.70806
	303.958	0.0833693		0.660991	0.170728	1.587	2.89331	1.67271
	304.458	0.0628491		0.746143	0.14905	1.51592	2.87925	1.63336
	304.958	0.0390015		0.842809	0.125877	1.598	2.91821	1.5906
	305.458	0.0137163		0.816846	0.0987923	1.52658	2.93213	1.5725
	305.958	-0.0106744		1.02386	0.0984196	1.67329	2.97899	1.65343
	306.458	-0.0335579		1.19515	0.11723	1.80748	2.9396	1.74962
	306.958	-0.0536989		1.33034	0.149822	1.92565	2.83224	1.85263
	307.458	-0.0723587		1.42905	0.190792	2.02432	2.67518	1.95406
	307.958	-0.0885217		1.49093	0.234737	2.09998	2.4867	2.04549
	308.458	-0.10143		1.5156	0.276256	2.14916	2.28507	2.1185
	308.958	-0.110104		1.50269	0.309946	2.16834	2.08857	2.16467
	309.458	-0.114895		1.45184	0.330404	2.15405	1.91546	2.17559
	309.958	-0.115179		1.36268	0.332227	2.10279	1.78403	2.14284
	310.458	-0.110383		0.965026	0.386468	1.98427	1.73725	2.09059
	310.958	-0.0991459		1.26422	0.354	2.14518	1.55228	2.06317
	311.458	-0.0827198		1.41513	0.3507	2.30895	1.36274	2.02675
	311.958	-0.0619904		1.45079	0.371145	2.4619	1.18045	1.98538
	312.458	-0.0390274		1.40425	0.409915	2.59035	1.01722	1.94312
	312.958	-0.014782		1.30855	0.461591	2.68064	0.884871	1.90403
	313.458	0.00976139		1.19672	0.52075	2.71909	0.795206	1.87217
	313.958	0.0327547		1.10183	0.581974	2.69202	0.760044	1.8516
	314.458	0.0537678		1.05689	0.63984	2.58577	0.791198	1.84638
	314.958	0.072415		1.09497	0.688929	2.38665	0.900481	1.86057
	315.458	0.0872572		0.895643	0.722542	2.23108	1.11683	1.91954
	315.958	0.100515		0.947208	0.779933	2.1456	1.19045	1.83916
	316.458	0.110777		0.937594	0.861797	2.11815	1.33465	1.76218
	316.958	0.116002		0.888829	0.957239	2.13314	1.5461	1.68825
	317.458	0.115799		0.82294	1.05536	2.17493	1.82149	1.61701
	317.958	0.110059		0.761955	1.14527	2.22793	2.1575	1.54809
	318.458	0.0989843		0.7279	1.21606	2.27652	2.55082	1.48113
	318.958	0.0837428		0.742803	1.25684	2.30508	2.99813	1.41577
	319.458	0.0633078		0.828692	1.25672	2.29801	3.49612	1.35164
	319.958	0.0394455		1.00759	1.2048	2.23969	4.04147	1.28839
	320.458	0.0148965		1.01625	1.15598	2.25761	4.38875	1.1584
	320.958	-0.00935178		1.19132	1.13289	2.31393	4.46291	1.07652
	321.458	-0.0324527		1.3323	1.10961	2.32854	4.50569	1.00603
	321.958	-0.05301		1.43838	1.08585	2.31172	4.531	0.94551
	322.458	-0.0722407		1.50869	1.06135	2.27377	4.55277	0.893541
	322.958	-0.0889856		1.5424	1.03583	2.225	4.5849	0.848703
	323.458	-0.10239		1.53866	1.00902	2.17569	4.64131	0.809573
	323.958	-0.111938		1.49664	0.980644	2.13615	4.73592	0.774731
	324.458	-0.117		1.41549	0.950435	2.11667	4.88264	0.742757
	324.958	-0.11708		1.29438	0.918119	2.12756	5.09538	0.71223
	325.458	-0.111919		1.06115	0.839386	2.09704	5.21498	0.6759
	325.958	-0.100074		1.1066	0.856064	2.22627	5.78623	0.636503
	326.458	-0.0829646		1.13878	0.864058	2.33096	6.61753	0.600467
	326.958	-0.0621347		1.1568	0.862606	2.41676	7.62503	0.568253
	327.458	-0.038803		1.1598	0.850947	2.48933	8.72488	0.540319
	327.958	-0.0141036		1.14689	0.82832	2.55429	9.8332	0.517123
	328.458	0.0108433		1.11721	0.793964	2.61732	10.8661	0.499124
	328.958	0.0343173		1.06986	0.747119	2.68404	11.7399	0.486781
	329.458	0.0557335		1.00399	0.687023	2.76012	12.3705	0.480551
	329.958	0.0747066		0.918701	0.612916	2.85121	12.6741	0.480894
	330.458	0.0903532		0.824309	0.550772	2.96762	13.2292	0.45503
	330.958	0.10369		0.775248	0.502278	3.03035	13.0419	0.481707
	331.458	0.11346		0.733343	0.456168	3.12674	12.985	0.490962
	331.958	0.117987		0.702805	0.411982	3.24478	13.0488	0.487111
	332.458	0.116908		0.687842	0.369255	3.37242	13.2235	0.474472
	332.958	0.110243		0.692662	0.327526	3.49764	13.4993	0.457363
	333.458	0.0982943		0.721475	0.286334	3.60841	13.8664	0.440101
	333.958	0.0822848		0.778489	0.245215	3.69271	14.315	0.427004
	334.458	0.0615104		0.867914	0.203707	3.73849	14.8354	0.42239
	334.958	0.0377551		0.993957	0.161349	3.73373	15.4178	0.430576
	335.458	0.0127685		1.05051	0.11675	3.62893	15.6961	0.426128
	335.958	-0.0116571		1.19113	0.0977669	3.43914	14.7189	0.437913
	336.458	-0.0347485		1.28586	0.0743259	3.27272	13.9439	0.421398
	336.958	-0.0552201		1.34419	0.0496277	3.13424	13.3213	0.387851
	337.458	-0.0741192		1.37562	0.0268734	3.02822	12.8011	0.348541
	337.958	-0.0904112		1.38961	0.00926388	2.95924	12.3332	0.314737
	338.458	-0.103378		1.39567	0	2.93183	11.8678	0.297706
	338.958	-0.11188		1.40327	0.00228272	2.95055	11.3549	0.308717
	339.458	-0.116167		1.4219	0.019313	3.01996	10.7445	0.359038
	339.958	-0.115882		1.46104	0.0542917	3.14459	9.98657	0.459937
	340.458	-0.11093		1.60639	0.153566	3.20251	10.3528	0.474973
	340.958	-0.0994435		1.57116	0.226632	3.27139	10.426	0.51082
	341.458	-0.0829063		1.44464	0.320288	3.37352	10.792	0.563934
	341.958	-0.0621143		1.25682	0.428053	3.50141	11.3167	0.627104
	342.458	-0.0389884		1.0377	0.543447	3.64759	11.8657	0.693119
	342.958	-0.0145762		0.817261	0.659989	3.8046	12.3049	0.754768
	343.458	0.0101462		0.625492	0.771199	3.96497	12.5	0.804838
	343.958	0.0337071		0.49238	0.870595	4.12122	12.3168	0.836119
	344.458	0.054949		0.447914	0.951698	4.26587	11.6212	0.8414
	344.958	0.0737403		0.522082	1.00803	4.39147	10.2787	0.813468
	345.458	0.0888657		0.683918	1.02919	4.48907	9.00282	0.75989
	345.958	0.101795		0.664495	1.10611	4.43359	6.93906	0.909508
	346.458	0.111559		0.730946	1.14018	4.32224	5.49068	1.04164
	346.958	0.116756		0.858966	1.14012	4.16608	4.54056	1.15534
	347.458	0.116365		1.02425	1.11459	3.97617	3.97161	1.24964
	347.958	0.110455		1.20251	1.0723	3.76359	3.66673	1.3236
	348.458	0.0992822		1.36942	1.02193	3.5394	3.50882	1.37626
	348.958	0.0837557		1.5007	0.972166	3.31467	3.38077	1.40666
	349.458	0.063483		1.57203	0.931709	3.10047	3.16549	1.41385
	349.958	0.0398966		1.55912	0.909243	2.90786	2.74588	1.39688
	350.458	0.0148557		1.47623	0.870659	2.67771	2.6546	1.50922
	350.958	-0.0095818		1.3367	0.946108	2.53153	2.00065	1.57351
	351.458	-0.0327815		1.28226	0.971842	2.42063	1.54397	1.67214
	351.958	-0.0537304		1.28553	0.960003	2.33552	1.27206	1.79243
	352.458	-0.0729921		1.31916	0.922729	2.26674	1.17243	1.92169
	352.958	-0.0895792		1.35579	0.872163	2.2048	1.23257	2.04726
	353.458	-0.102728		1.36804	0.820442	2.14022	1.44	2.15644
	353.958	-0.111708		1.32855	0.779709	2.06351	1.78219	2.23656
	354.458	-0.116404		1.20997	0.762101	1.9652	2.24667	2.27495
	354.958	-0.116403		0.984921	0.779761	1.8358	2.82093	2.25892
	355.458	-0.111881		0.963913	0.843299	1.71142	3.33517	2.22368
	355.958	-0.100627		0.911392	0.926294	1.62664	3.55547	2.06823
	356.458	-0.084019		0.869624	0.989053	1.54788	3.8418	1.93033
	356.958	-0.0632666		0.833861	1.0347	1.47368	4.17053	1.80955
	357.458	-0.0399948		0.799358	1.06635	1.40258	4.51801	1.70544
	357.958	-0.0153328		0.761366	1.08714	1.33311	4.86061	1.61758
	358.458	0.00965408		0.715141	1.10017	1.26381	5.17469	1.54551
	358.958	0.0339484		0.655934	1.10859	1.19322	5.43661	1.48882
	359.458	0.0555639		0.578999	1.11551	1.11989	5.62274	1.44704
	359.958	0.0743906		0.47959	1.12404	1.04233	5.70944	1.41976
	360.458	0.0894322		0.522174	1.26055	0.89796	5.85183	1.4322
	360.958	0.102212		0.46916	1.18956	0.904441	5.57509	1.35139
	361.458	0.111752		0.446683	1.13938	0.868399	5.41571	1.28293
	361.958	0.117182		0.450545	1.10597	0.800234	5.34334	1.22549
	362.458	0.116724		0.476549	1.08531	0.710348	5.32761	1.17774
	362.958	0.110535		0.520498	1.07335	0.609141	5.33816	1.13835
	363.458	0.0989203		0.578196	1.06607	0.507014	5.34465	1.106
	363.958	0.0831146		0.645446	1.05943	0.414369	5.3167	1.07935
	364.458	0.0624604		0.718051	1.04939	0.341607	5.22395	1.05709
	364.958	0.0385156		0.791814	1.03193	0.299127	5.03606	1.03788
	365.458	0.0132139		0.773001	0.99517	0.270406	5.09047	0.947485
	365.958	-0.0111898		0.926671	0.981969	0.272928	4.41406	1.03704
	366.458	-0.0342246		1.11345	0.968624	0.29965	3.7949	1.11105
	366.958	-0.054724		1.31116	0.953992	0.344246	3.24117	1.16803
	367.458	-0.0736496		1.49759	0.936926	0.40039	2.76103	1.20646
	367.958	-0.0899821		1.65057	0.916282	0.461756	2.36267	1.22485
	368.458	-0.102913		1.7479	0.890914	0.522018	2.05425	1.22169
	368.958	-0.112182		1.76739	0.859679	0.574849	1.84395	1.19547
	369.458	-0.117002		1.68685	0.821429	0.613924	1.73995	1.14471
	369.958	-0.116805		1.48409	0.775021	0.632917	1.75042	1.06788
	370.458	-0.111505		1.34503	0.705679	0.56589	1.70018	0.994491
	370.958	-0.0995445		1.24286	0.683774	0.632497	1.59065	0.964418
	371.458	-0.0823016		1.14385	0.65837	0.718926	1.52162	0.953025
	371.958	-0.0615386		1.04924	0.629019	0.811777	1.49069	0.955233
	372.458	-0.0383332		0.960285	0.595275	0.897648	1.49548	0.965961
	372.958	-0.0138182		0.87822	0.556691	0.963141	1.53358	0.980127
	373.458	0.0109108		0.804296	0.512819	0.994855	1.60261	0.992652
	373.958	0.0343727		0.739758	0.463212	0.979388	1.70017	0.998455
	374.458	0.0555701		0.685852	0.407425	0.903341	1.82388	0.992456
	374.958	0.0742845		0.643824	0.345008	0.753313	1.97134	0.969573
	375.458	0.0898863		0.59957	0.309893	0.732282	2.03779	0.995198
	375.958	0.103175		0.524318	0.291099	0.616863	2.07222	1.00024
	376.458	0.113011		0.476682	0.28012	0.589949	2.16635	0.999102
	376.958	0.117976		0.45486	0.2743	0.631625	2.30493	0.992355
	377.458	0.11724		0.457048	0.270983	0.721975	2.47273	0.980576
	377.958	0.110854		0.481441	0.267513	0.841084	2.65452	0.964344
	378.458	0.0990638		0.526235	0.261236	0.969037	2.83506	0.944235
	378.958	0.0831409		0.589627	0.249496	1.08592	2.9991	0.920825
	379.458	0.0624728		0.669813	0.229636	1.17181	3.13142	0.894692
	379.958	0.0386692		0.764987	0.199002	1.2068	3.21678	0.866412
	380.458	0.0141271		0.918846	0.118045	1.01835	3.0557	0.846015
	380.958	-0.0100679		1.00918	0.168713	1.17172	3.10426	0.803876
	381.458	-0.0332649		1.1055	0.19767	1.3817	3.09484	0.764901
	381.958	-0.0540943		1.19893	0.208642	1.62417	3.04366	0.72975
	382.458	-0.0733782		1.28059	0.205357	1.87501	2.96691	0.699087
	382.958	-0.0900242		1.34159	0.191542	2.11012	2.8808	0.673572
	383.458	-0.103198		1.37306	0.170923	2.30538	2.80155	0.653868
	383.958	-0.112636		1.36611	0.147227	2.43667	2.74536	0.640636
	384.458	-0.11742		1.31187	0.124183	2.47988	2.72844	0.634538
	384.958	-0.117142		1.20145	0.105516	2.4109	2.76699	0.636236
	385.458	-0.111682		1.0856	0.0991209	2.22954	2.92273	0.657962
	385.958	-0.0996168		0.937262	0.098073	2.35359	3.03569	0.681191
	386.458	-0.0823806		0.808546	0.0945954	2.41606	3.12637	0.687594
	386.958	-0.0617451		0.697809	0.0901372	2.43199	3.19498	0.684201
	387.458	-0.0385883		0.603407	0.0861477	2.41641	3.24176	0.678046
	387.958	-0.0140676		0.523694	0.0840759	2.38437	3.26693	0.67616
	388.458	0.0107535		0.457028	0.085371	2.35091	3.27072	0.685576
	388.958	0.0342131		0.401762	0.0914823	2.33107	3.25334	0.713325
	389.458	0.0553736		0.356254	0.103859	2.3399	3.21503	0.766439
	389.958	0.0740776		0.318857	0.12395	2.39244	3.15602	0.851951
	390.458	0.0897564		0.259193	0.142469	2.37028	3.16861	0.921525
	390.958	0.102926		0.239832	0.140005	2.34196	2.993	1.06133
	391.458	0.112659		0.228074	0.129855	2.26499	2.85551	1.16769
	391.958	0.117462		0.225558	0.116431	2.15397	2.77113	1.24433
	392.458	0.116597		0.233924	0.104145	2.02348	2.75485	1.29494
	392.958	0.11014		0.25481	0.0974069	1.88812	2.82163	1.32323
	393.458	0.0983141		0.289856	0.100629	1.76246	2.98647	1.33292
	393.958	0.0823303		0.340699	0.118222	1.66111	3.26435	1.3277
	394.458	0.0616639		0.40898	0.154597	1.59866	3.67024	1.31129
	394.958	0.0377536		0.496336	0.214166	1.58968	4.21914	1.2874
	395.458	0.0129213		0.332193	0.506404	1.30919	6.69116	1.06628
	395.958	-0.0112068		0.654443	0.437918	1.68489	5.34638	1.19218
	396.458	-0.0341848		0.9109	0.375459	1.96584	4.44223	1.26142
	396.958	-0.0547928		1.10522	0.321592	2.16561	3.90616	1.28357
	397.458	-0.0737634		1.24105	0.278885	2.29778	3.66567	1.2682
	397.958	-0.0900801		1.32206	0.249906	2.37592	3.64823	1.22486
	398.458	-0.10292		1.35189	0.237222	2.41361	3.78131	1.16313
	398.958	-0.111821		1.3342	0.243399	2.42443	3.9924	1.09256
	399.458	-0.11643		1.27264	0.271005	2.42195	4.20896	1.02273
	399.958	-0.11607		1.17087	0.322607	2.41975	4.35849	0.963186
	400.458	-0.110642		1.10787	0.396277	2.64081	3.34125	0.954015
	400.958	-0.098877		0.999568	0.452983	2.69393	3.81256	0.853312
	401.458	-0.0819242		0.938405	0.499372	2.86345	4.02737	0.813001
	401.958	-0.0612017		0.915002	0.539822	3.12313	4.02539	0.819847
	402.458	-0.038142		0.919986	0.578709	3.44669	3.84633	0.860615
	402.958	-0.0137624		0.943984	0.620411	3.80791	3.52989	0.922073
	403.458	0.0108864		0.977619	0.669304	4.18052	3.11578	0.990985
	403.958	0.0343338		1.01152	0.729767	4.53828	2.6437	1.05412
	404.458	0.0556626		1.03631	0.806176	4.85494	2.15335	1.09824
	404.958	0.0743995		1.04262	0.902909	5.10424	1.68444	1.11011
	405.458	0.089526		1.15413	0.989426	5.30328	1.34408	1.0787
	405.958	0.102484		1.08335	1.01579	5.28566	1.27021	1.05753
	406.458	0.112052		1.07435	1.03493	5.18803	1.17757	1.03513
	406.958	0.116794		1.11	1.0503	5.02489	1.09005	1.01315
	407.458	0.116026		1.17313	1.06536	4.81075	1.03152	0.993227
	407.958	0.109717		1.24661	1.0836	4.56009	1.02585	0.977006
	408.458	0.0981		1.3133	1.10846	4.28744	1.09694	0.966131
	408.958	0.082465		1.35604	1.14342	4.00728	1.26865	0.962248
	409.458	0.0618909		1.3577	1.19194	3.73411	1.56486	0.967
	409.958	0.0379422		1.30112	1.25748	3.48244	2.00945	0.982032
	410.458	0.0125243		1.40072	1.21465	3.45458	2.08853	1.00241
	410.958	-0.012244		1.47286	1.2227	3.42622	2.25307	0.996417
	411.458	-0.0356208		1.53375	1.23345	3.37661	2.45244	0.963268
	411.958	-0.0561565		1.57653	1.24652	3.30612	2.69276	0.910147
	412.458	-0.0749547		1.59435	1.26153	3.21511	2.98019	0.844239
	412.958	-0.0909784		1.58034	1.2781	3.10396	3.32087	0.772729
	413.458	-0.103434		1.52766	1.29585	2.97304	3.72094	0.702802
	413.958	-0.111627		1.42943	1.31439	2.82274	4.18655	0.641643
	414.458	-0.115803		1.27882	1.33335	2.65341	4.72384	0.596437
	414.958	-0.115453		1.06895	1.35235	2.46544	5.33895	0.57437
	415.458	-0.110624		0.834339	1.38439	2.21696	6.21	0.579415
	415.958	-0.0991739		0.607715	1.35982	1.94855	6.005	0.523205
	416.458	-0.0823314		0.441273	1.33641	1.71999	5.92623	0.473662
	416.958	-0.0612558		0.323877	1.31164	1.52757	5.94622	0.430079
	417.458	-0.0378846		0.244391	1.28299	1.36759	6.03748	0.391751
	417.958	-0.013233		0.191677	1.24797	1.23635	6.17254	0.357969
	418.458	0.0116792		0.154601	1.20404	1.13015	6.32392	0.328028
	418.958	0.0354324		0.122027	1.1487	1.04528	6.46414	0.30122
	419.458	0.0567241		0.0828167	1.07943	0.978046	6.56573	0.276839
	419.958	0.0752314		0.0258355	0.993716	0.924744	6.60119	0.254178
	420.458	0.0897958		0.0562959	0.883513	0.92569	6.64308	0.254642
	420.958	0.102401		0.00268716	0.88628	0.912586	6.42536	0.224194
	421.458	0.111913		0	0.872153	1.01467	6.26205	0.209963
	421.958	0.116951		0.0384969	0.841448	1.19326	6.13567	0.208102
	422.458	0.116404		0.10844	0.794482	1.40971	6.0287	0.214761
	422.958	0.110291		0.200093	0.731573	1.62534	5.92364	0.226093
	423.458	0.0988605		0.303716	0.653037	1.80148	5.80298	0.23825
	423.958	0.0833483		0.409574	0.55919	1.89948	5.64921	0.247382
	424.458	0.0628482		0.507928	0.45035	1.88067	5.44482	0.249642
	424.958	0.0388707		0.589042	0.326834	1.70637	5.17231	0.241181
	425.458	0.0136762		0.667565	0.255589	1.71468	4.93289	0.247296
	425.958	-0.010873		0.769114	0.242894	1.6195	4.95915	0.248918
	426.458	-0.0340773		0.890571	0.222138	1.55018	5.02426	0.243582
	426.958	-0.0545578		1.01809	0.195575	1.50449	5.10851	0.234252
	427.458	-0.0733891		1.13784	0.165458	1.48021	5.19218	0.223896
	427.958	-0.0895395		1.23597	0.134041	1.47511	5.25555	0.21548
	428.458	-0.102209		1.29864	0.103577	1.48697	5.27892	0.211972
	428.958	-0.111107		1.312	0.0763206	1.51356	5.24254	0.216336
	429.458	-0.115819		1.26222	0.0545251	1.55265	5.12672	0.23154
	429.958	-0.115905		1.13545	0.0404442	1.60203	4.91172	0.260551
	430.458	-0.111273		1.06673	0.0403842	1.71852	4.81941	0.283674
	430.958	-0.100017		0.943915	0.0346687	1.71418	4.66831	0.330536
	431.458	-0.0833733		0.821196	0.044525	1.68555	4.65547	0.352431
	431.958	-0.0629145		0.703822	0.0654678	1.64025	4.74313	0.355711
	432.458	-0.0399222		0.597044	0.0930118	1.58591	4.89354	0.34673
	432.958	-0.0154835		0.506112	0.122672	1.53014	5.06894	0.331841
	433.458	0.00933631		0.436277	0.149963	1.48057	5.23156	0.317397
	433.958	0.0329284		0.392787	0.170399	1.44482	5.34366	0.309751
	434.458	0.0541146		0.380895	0.179495	1.4305	5.36748	0.315256
	434.958	0.0725409		0.40585	0.172766	1.44524	5.26526	0.340265
	435.458	0.0877096		0.645652	0.176785	1.49928	4.48093	0.410666
	435.958	0.100849		0.692354	0.142221	1.52047	4.89145	0.445903
	436.458	0.11085		0.769378	0.159608	1.59738	4.94925	0.485267
	436.958	0.116203		0.870754	0.214207	1.71676	4.73126	0.526276
	437.458	0.115975		0.990514	0.291278	1.86538	4.31441	0.566448
	437.958	0.110202		1.12269	0.376079	2.02999	3.77566	0.603303
	438.458	0.0991478		1.26131	0.453872	2.19734	3.19192	0.634358
	438.958	0.083809		1.4004	0.509916	2.35418	2.64015	0.657135
	439.458	0.0634144		1.53401	0.529471	2.48726	2.19728	0.669149
	439.958	0.0395872		1.65615	0.497796	2.58335	1.94025	0.667922
	440.458	0.0146142		1.77827	0.469825	2.55767	1.54491	0.714855
	440.958	-0.00973158		1.77992	0.441276	2.60183	1.31399	0.67458
	441.458	-0.0327489		1.70911	0.438827	2.57818	1.04603	0.74519
	441.958	-0.0533261		1.58811	0.456307	2.5055	0.776636	0.894448
	442.458	-0.0724423		1.4392	0.487541	2.40253	0.541406	1.09011
	442.958	-0.0890045		1.28467	0.526359	2.28804	0.375944	1.29995
	443.458	-0.10218		1.1468	0.566588	2.18079	0.315851	1.49172
	443.958	-0.111432		1.04786	0.602055	2.09955	0.396728	1.63318
	444.458	-0.116317		1.01014	0.626588	2.06308	0.654178	1.6921
	444.958	-0.116319		1.05591	0.634016	2.09013	1.1238	1.63623
	445.458	-0.111569		0.984912	0.675917	1.90959	1.17025	1.67281
	445.958	-0.100067		0.933997	0.691207	1.80175	1.35823	1.6088
	446.458	-0.0831956		0.89027	0.715722	1.69853	1.57132	1.53611
	446.958	-0.0624475		0.853442	0.746364	1.59959	1.80026	1.45699
	447.458	-0.0392261		0.823226	0.780034	1.50459	2.03578	1.37368
	447.958	-0.0146797		0.799334	0.813632	1.41319	2.26863	1.28842
	448.458	0.0100608		0.781477	0.844061	1.32505	2.48955	1.20347
	448.958	0.0338569		0.769368	0.86822	1.23983	2.68927	1.12106
	449.458	0.0552885		0.762718	0.883012	1.15718	2.85855	1.04345
	449.958	0.0740002		0.76124	0.885337	1.07676	2.9881	0.972865
	450.458	0.0893152		0.712958	0.912035	1.04143	2.91606	0.824517
	450.958	0.102337		0.707097	0.870612	0.95444	3.05567	0.851538
	451.458	0.11189		0.688787	0.833338	0.880165	3.20339	0.843164
	451.958	0.116949		0.666809	0.801453	0.821113	3.34601	0.808026
	452.458	0.116366		0.649943	0.776198	0.779796	3.4703	0.754752
	452.958	0.110213		0.64697	0.758813	0.758726	3.56303	0.691971
	453.458	0.0988128		0.666669	0.750538	0.760416	3.61098	0.628312
	453.958	0.0831918		0.717821	0.752615	0.787377	3.60092	0.572403
	454.458	0.0627732		0.809207	0.766285	0.842122	3.51964	0.532875
	454.958	0.0392712		0.949607	0.792786	0.927162	3.3539	0.518354
	455.458	0.0140147		1.02895	0.806409	1.21339	3.32026	0.584993
	455.958	-0.0104447		1.28615	0.791874	1.05878	2.91988	0.632008
	456.458	-0.0334574		1.50539	0.777536	1.04725	2.4599	0.665357
	456.958	-0.05401		1.68358	0.76382	1.15215	1.97225	0.687399
	457.458	-0.0730296		1.81761	0.751152	1.34684	1.48884	0.700495
	457.958	-0.0894905		1.90435	0.739955	1.60467	1.04161	0.707001
	458.458	-0.102628		1.94071	0.730654	1.89899	0.662468	0.709279
	458.958	-0.111454		1.92356	0.723674	2.20317	0.383339	0.709687
	459.458	-0.116086		1.84981	0.71944	2.49055	0.236145	0.710583
	459.958	-0.115974		1.71634	0.718376	2.73448	0.252808	0.714327
	460.458	-0.11122		1.62475	0.737919	2.88936	0.238075	0.797184
	460.958	-0.0998082		1.49379	0.739311	2.88713	0.294592	0.839622
	461.458	-0.0831456		1.39272	0.746702	2.84455	0.31605	0.886443
	461.958	-0.0622323		1.31362	0.760249	2.77125	0.314036	0.93363
	462.458	-0.0389964		1.24857	0.780115	2.67685	0.300135	0.977172
	462.958	-0.0145154		1.18964	0.806458	2.57097	0.285933	1.01305
	463.458	0.0101399		1.12892	0.839439	2.46323	0.283016	1.03726
	463.958	0.0339317		1.05847	0.879217	2.36326	0.302969	1.04577
	464.458	0.0553924		0.970396	0.925954	2.28068	0.35738	1.03459
	464.958	0.0742672		0.856758	0.979809	2.22511	0.457833	0.999683
	465.458	0.0891409		0.883321	0.946315	2.14828	0.53554	0.968432
	465.958	0.101969		0.84047	1.01258	2.09052	0.528164	0.961277
	466.458	0.111496		0.867506	1.0698	2.0449	0.65153	0.950232
	466.958	0.116663		0.947909	1.11954	2.01034	0.87198	0.934784
	467.458	0.116141		1.06516	1.16336	1.98577	1.15585	0.914425
	467.958	0.109977		1.20273	1.20283	1.97011	1.4695	0.888642
	468.458	0.0984648		1.34412	1.23952	1.96228	1.77925	0.856926
	468.958	0.0829081		1.47278	1.27498	1.96121	2.05144	0.818765
	469.458	0.062424		1.57222	1.3108	1.96583	2.25243	0.773648
	469.958	0.0387427		1.6259	1.34852	1.97505	2.34856	0.721065
	470.458	0.0137106		1.56943	1.32865	2.04115	2.36993	0.667371
	470.958	-0.0107381		1.67493	1.37193	1.99469	2.17523	0.617527
	471.458	-0.0338618		1.7541	1.36365	2.00253	2.02423	0.57956
	471.958	-0.0542771		1.80694	1.31704	2.05568	1.9278	0.549036
	472.458	-0.0731558		1.83345	1.24532	2.14515	1.89686	0.521524
	472.958	-0.0894238		1.83361	1.16172	2.26197	1.94227	0.492589
	473.458	-0.102295		1.80743	1.07946	2.39716	2.07494	0.457801
	473.958	-0.11133		1.75489	1.01177	2.54172	2.30575	0.412725
	474.458	-0.115952		1.67598	0.971862	2.68668	2.6456	0.35293
	474.958	-0.115801		1.57071	0.972974	2.82305	3.10537	0.273982
	475.458	-0.111052		1.51005	0.949848	2.99629	3.68765	0.211831
	475.958	-0.099529		1.42462	0.956795	3.02122	5.05667	0.174183
	476.458	-0.082713		1.34252	0.926422	3.08826	6.11342	0.141234
	476.958	-0.0621813		1.26578	0.870323	3.18764	6.90563	0.115488
	477.458	-0.0391173		1.19642	0.800095	3.30958	7.48101	0.0994532
	477.958	-0.0146722		1.13648	0.727334	3.44433	7.88727	0.0956346
	478.458	0.0100872		1.08797	0.663637	3.58211	8.17212	0.106539
	478.958	0.0337836		1.05292	0.620598	3.71315	8.38328	0.134672
	479.458	0.0550407		1.03335	0.609815	3.82769	8.56846	0.182541
	479.958	0.0736907		1.03129	0.642883	3.91595	8.77537	0.252652
	480.458	0.0891139		1.17872	0.655568	4.07522	9.1739	0.327747
	480.958	0.10214		1.21935	0.723799	3.97302	11.2084	0.36631
	481.458	0.111825		1.2479	0.782981	4.04907	12.1843	0.404278
	481.958	0.116966		1.26498	0.833151	4.26098	12.2653	0.441915
	482.458	0.116416		1.2712	0.874346	4.56639	11.6147	0.479486
	482.958	0.110288		1.26717	0.906603	4.92291	10.3963	0.517254
	483.458	0.098867		1.2535	0.92996	5.28816	8.77337	0.555485
	483.958	0.0832425		1.23079	0.944454	5.61978	6.90959	0.594442
	484.458	0.0629185		1.19966	0.950122	5.87538	4.96845	0.63439
	484.958	0.0393966		1.16071	0.947002	6.01258	3.11347	0.675593
	485.458	0.0147025		0.956108	1.03417	5.84896	1.71835	0.717785
	485.958	-0.00946072		1.28444	0.978356	5.75575	1.23004	0.734059
	486.458	-0.03246		1.51968	0.954736	5.56271	0.912323	0.788412
	486.958	-0.0531389		1.67467	0.95593	5.29496	0.747206	0.868651
	487.458	-0.0722087		1.76224	0.97456	4.97761	0.71669	0.962579
	487.958	-0.0886644		1.79525	1.00325	4.63578	0.802781	1.058
	488.458	-0.101747		1.78652	1.03461	4.29458	0.987483	1.14273
	488.958	-0.111041		1.7489	1.06127	3.97914	1.2528	1.20455
	489.458	-0.115932		1.69522	1.07585	3.71457	1.58073	1.23129
	489.958	-0.116076		1.63832	1.07096	3.526	1.95328	1.21075
	490.458	-0.110868		1.77071	1.14078	3.55602	2.57296	1.19327
	490.958	-0.0993695		1.67309	1.08745	3.31802	3.45069	1.05539
	491.458	-0.0828295		1.58059	1.0932	3.11629	4.44585	0.941186
	491.958	-0.0626439		1.49574	1.14322	2.94711	5.49864	0.848707
	492.458	-0.0398216		1.42109	1.22274	2.80676	6.54926	0.775984
	492.958	-0.0154444		1.35916	1.31695	2.69152	7.53792	0.721052
	493.458	0.00946116		1.3125	1.41107	2.59767	8.4048	0.681946
	493.958	0.0328963		1.28363	1.4903	2.52148	9.09012	0.656702
	494.458	0.0542043		1.2751	1.53985	2.45925	9.53407	0.643354
	494.958	0.0730076		1.28945	1.54494	2.40723	9.67685	0.639938
	495.458	0.0885121		1.30622	1.56362	2.37631	10.2392	0.639225
	495.958	0.101705		1.23381	1.53701	2.09461	9.91993	0.527008
	496.458	0.111622		1.23595	1.53115	2.0727	9.55832	0.464056
	496.958	0.116439		1.29145	1.53691	2.25551	9.11396	0.441423
	497.458	0.115788		1.37912	1.54516	2.588	8.54643	0.450162
	497.958	0.109694		1.47777	1.54677	3.01511	7.8153	0.481327
	498.458	0.0984048		1.56621	1.53259	3.48178	6.88014	0.525971
	498.958	0.08301		1.62324	1.4935	3.93296	5.70053	0.575147
	499.458	0.0627105		1.62769	1.42037	4.31359	4.23603	0.61991
	499.958	0.0390102		1.55835	1.30405	4.56862	2.44624	0.651312
	500.458	0.0143616		1.6719	1.3222	4.76955	1.94054	0.68395
	500.958	-0.00995934		1.84695	1.28561	5.07158	1.06665	0.670592
	501.458	-0.0331627		1.9585	1.24388	5.35371	0.523783	0.679016
	501.958	-0.0539355		2.01584	1.20308	5.60262	0.27029	0.702992
	502.458	-0.0731747		2.02824	1.16927	5.805	0.264515	0.73629
	502.958	-0.0897933		2.00498	1.14851	5.94753	0.464802	0.772679
	503.458	-0.102971		1.95533	1.14687	6.0169	0.8295	0.805928
	503.958	-0.112018		1.88856	1.1704	5.99978	1.31695	0.829809
	504.458	-0.11657		1.81396	1.22518	5.88286	1.88551	0.83809
	504.958	-0.116209		1.74079	1.31726	5.65284	2.49351	0.82454
	505.458	-0.111016		1.75462	1.55664	5.61141	3.43347	0.719792
	505.958	-0.0993325		1.78615	1.5601	5.1697	3.0193	0.738378
	506.458	-0.0825039		1.78377	1.5603	4.74152	2.86198	0.747969
	506.958	-0.0618049		1.75612	1.55788	4.33095	2.92705	0.749392
	507.458	-0.0386283		1.7118	1.55349	3.94207	3.18006	0.743471
	507.958	-0.0141127		1.65943	1.54777	3.57895	3.58654	0.731033
	508.458	0.0106382		1.60764	1.54135	3.24567	4.11204	0.712902
	508.958	0.034264		1.56505	1.53489	2.94632	4.72208	0.689905
	509.458	0.0556429		1.54027	1.52902	2.68496	5.38221	0.662867
	509.958	0.074443		1.54192	1.5244	2.46569	6.05797	0.632613
	510.458	0.0893996		1.50237	1.51561	2.32894	6.49496	0.603514
	510.958	0.102249		1.52412	1.55743	2.18887	6.92837	0.532615
	511.458	0.111769		1.52267	1.57046	2.04953	7.20728	0.470416
	511.958	0.116641		1.50602	1.56249	1.91419	7.34887	0.416261
	512.458	0.115939		1.4822	1.54134	1.78612	7.37029	0.369489
	512.958	0.109688		1.45923	1.5148	1.6686	7.28869	0.329443
	513.458	0.0981656		1.44513	1.49068	1.56491	7.12124	0.295464
	513.958	0.082801		1.44793	1.47679	1.47832	6.8851	0.266893
	514.458	0.0624303		1.47564	1.48092	1.41211	6.59743	0.243072
	514.958	0.0388815		1.53628	1.51088	1.36954	6.27538	0.223341
	515.458	0.0139251		1.56852	1.52189	1.32998	5.977	0.231333
	515.958	-0.0102674		1.77966	1.5028	1.365	5.33124	0.170449
	516.458	-0.0330631		1.95561	1.47678	1.39764	4.60573	0.138318
	516.958	-0.0530435		2.09727	1.44626	1.43531	3.83693	0.130331
	517.458	-0.0717491		2.20553	1.4137	1.48539	3.06127	0.141882
	517.958	-0.0880936		2.2813	1.38151	1.55528	2.3152	0.168362
	518.458	-0.101295		2.32546	1.35215	1.65235	1.63516	0.205164
	518.958	-0.110461		2.3389	1.32804	1.784	1.05761	0.247682
	519.458	-0.11555		2.32253	1.31163	1.95761	0.618981	0.291306
	519.958	-0.115974		2.27724	1.30534	2.18059	0.355725	0.331431
	520.458	-0.111523		2.3326	1.30788	2.10561	0.206087	0.371998
	520.958	-0.100311		2.14084	1.29612	2.73164	0.176644	0.375615
	521.458	-0.0837818		2.00424	1.29046	3.12661	0.155345	0.403221
	521.958	-0.0630687		1.9096	1.28992	3.32966	0.144545	0.448
	522.458	-0.0399458		1.84376	1.29355	3.37996	0.1466	0.503135
	522.958	-0.0154406		1.79351	1.30039	3.31665	0.163863	0.561809
	523.458	0.00943189		1.74567	1.30948	3.17888	0.19869	0.617205
	523.958	0.0329568		1.68706	1.31984	3.00582	0.253435	0.662507
	524.458	0.0544081		1.60448	1.33052	2.8366	0.330453	0.690897
	524.958	0.0734765		1.48474	1.34056	2.71039	0.432099	0.695559
	525.458	0.0885802		1.31072	1.30775	2.5972	0.275557	0.725012
	525.958	0.101805		1.29694	1.36663	2.56468	0.596355	0.692835
	526.458	0.111885		1.28304	1.38498	2.52247	0.807283	0.674921
	526.958	0.117022		1.26821	1.37183	2.47261	0.962785	0.665917
	527.458	0.116576		1.25162	1.33621	2.4171	1.11731	0.660474
	527.958	0.110492		1.23247	1.28718	2.35798	1.32529	0.653238
	528.458	0.0989937		1.20993	1.23376	2.29725	1.64118	0.638858
	528.958	0.083556		1.18319	1.185	2.23695	2.11941	0.611982
	529.458	0.0629202		1.15144	1.14993	2.1791	2.81444	0.567259
	529.958	0.0387246		1.11385	1.13759	2.12571	3.78071	0.499336
	530.458	0.013661		1.14873	1.10284	2.12566	4.08313	0.48367
	530.958	-0.011023		1.20705	1.06395	2.08424	4.42047	0.415334
	531.458	-0.0344533		1.25064	1.0121	2.08741	4.43603	0.378477
	531.958	-0.0548967		1.27927	0.950975	2.12604	4.23322	0.364449
	532.458	-0.0737465		1.29271	0.884273	2.19101	3.91541	0.364603
	532.958	-0.0898909		1.29074	0.815685	2.27319	3.586	0.370287
	533.458	-0.102512		1.27311	0.748901	2.36346	3.34839	0.372854
	533.958	-0.111327		1.23962	0.687614	2.45271	3.30595	0.363655
	534.458	-0.115781		1.19001	0.635516	2.5318	3.56209	0.33404
	534.958	-0.115546		1.12407	0.596298	2.59162	4.2202	0.275361
	535.458	-0.110933		1.16008	0.55142	2.82866	3.36074	0.306426
	535.958	-0.0995405		1.15092	0.543534	2.92746	3.62066	0.332394
	536.458	-0.0827776		1.17996	0.554953	3.03347	4.37627	0.350482
	536.958	-0.0623331		1.23537	0.582279	3.15574	5.41181	0.363788
	537.458	-0.039368		1.30529	0.622109	3.3033	6.51152	0.375407
	537.958	-0.0150125		1.3779	0.671044	3.4852	7.45964	0.388438
	538.458	0.00967788		1.44135	0.725683	3.71048	8.04042	0.405977
	538.958	0.0332108		1.4838	0.782627	3.9882	8.0381	0.431121
	539.458	0.0542891		1.49342	0.838474	4.32739	7.23692	0.466968
	539.958	0.0727014		1.45837	0.889824	4.73709	5.42112	0.516614
	540.458	0.0879223		1.43968	0.96653	5.10323	2.92257	0.588304
	540.958	0.101039		1.24213	0.97912	5.29429	2.03459	0.641033
	541.458	0.111017		1.12644	0.989442	5.36	1.36627	0.681167
	541.958	0.116465		1.07499	0.998007	5.32004	0.89153	0.713564
	542.458	0.116271		1.07011	1.00533	5.19408	0.584271	0.743083
	542.958	0.110489		1.09416	1.01192	5.00179	0.418403	0.774585
	543.458	0.0993679		1.1295	1.01829	4.76284	0.367832	0.812928
	543.958	0.0840215		1.15848	1.02496	4.49688	0.406468	0.862971
	544.458	0.0636914		1.16345	1.03244	4.22361	0.508216	0.929574
	544.958	0.0399807		1.12677	1.04123	3.96267	0.646986	1.0176
	545.458	0.0152864		1.12585	1.06177	3.68496	0.698586	1.06312
	545.958	-0.00886692		1.10662	1.04684	3.59493	0.947544	1.16034
	546.458	-0.0318124		1.16075	1.01946	3.46405	1.35152	1.20703
	546.958	-0.0523333		1.26451	0.987809	3.30322	1.86324	1.21153
	547.458	-0.0713977		1.39413	0.960101	3.12335	2.43543	1.18213
	547.958	-0.0879266		1.52587	0.944532	2.93533	3.02082	1.12716
	548.458	-0.101117		1.63597	0.949304	2.75008	3.57212	1.05493
	548.958	-0.110686		1.70069	0.982617	2.5785	4.04206	0.97376
	549.458	-0.115836		1.69628	1.05267	2.43149	4.38336	0.891964
	549.958	-0.116163		1.59899	1.16767	2.31996	4.54876	0.817858
	550.458	-0.111137		1.55181	1.24197	2.15365	5.05091	0.80966
	550.958	-0.099648		1.48596	1.27746	2.099	5.85812	0.73387
	551.458	-0.0829708		1.43116	1.29361	2.02788	6.53513	0.660098
	551.958	-0.0627121		1.38763	1.29508	1.94609	7.08005	0.591171
	552.458	-0.039776		1.35558	1.28654	1.85943	7.49101	0.529921
	552.958	-0.0152696		1.33523	1.27263	1.7737	7.76612	0.479175
	553.458	0.00973192		1.32677	1.25801	1.69469	7.9035	0.441763
	553.958	0.0332362		1.33044	1.24734	1.62821	7.90126	0.420514
	554.458	0.0546089		1.34643	1.24526	1.58005	7.75752	0.418258
	554.958	0.0733106		1.37496	1.25644	1.55601	7.4704	0.437823
	555.458	0.0887895		1.32177	1.29825	1.7787	7.76252	0.452715
	555.958	0.101931		1.43053	1.29065	1.60183	6.89784	0.488132
	556.458	0.111707		1.53192	1.27764	1.52393	5.87942	0.537518
	556.958	0.116338		1.62368	1.26105	1.54434	4.77727	0.594928
	557.458	0.115569		1.70355	1.24273	1.66242	3.66144	0.654415
	557.958	0.109402		1.76928	1.22453	1.87749	2.60194	0.710032
	558.458	0.0981239		1.81862	1.20828	2.18891	1.6688	0.755834
	558.958	0.0826834		1.8493	1.19582	2.59601	0.932051	0.785874
	559.458	0.062204		1.85908	1.18902	3.09815	0.46172	0.794206
	559.958	0.038241		1.8457	1.18969	3.69466	0.327834	0.774883
	560.458	0.0131322		1.90136	1.23329	4.26824	0.315707	0.819417
	560.958	-0.0112636		1.81292	1.18542	4.96673	0.289215	0.768533
	561.458	-0.0341817		1.783	1.16087	5.50006	0.255601	0.741852
	561.958	-0.0545267		1.78826	1.15502	5.87459	0.220258	0.738461
	562.458	-0.0733561		1.80539	1.16326	6.09665	0.188576	0.75745
	562.958	-0.0896259		1.81103	1.18096	6.17258	0.165948	0.797907
	563.458	-0.102534		1.78187	1.20351	6.10871	0.157766	0.85892
	563.958	-0.111266		1.69456	1.2263	5.91138	0.169421	0.939577
	564.458	-0.11601		1.52577	1.2447	5.58693	0.206305	1.03897
	564.958	-0.116077		1.25218	1.2541	5.1417	0.27381	1.15618
	565.458	-0.111523		1.14306	1.24854	4.52999	0.295775	1.3184
	565.958	-0.100112		1.01527	1.21644	4.26167	0.460523	1.31677
	566.458	-0.0832194		0.941771	1.17704	4.01219	0.564094	1.30183
	566.958	-0.0620624		0.908243	1.13399	3.77385	0.628946	1.2774
	567.458	-0.0387166		0.900362	1.09091	3.53899	0.677534	1.24729
	567.958	-0.0142373		0.903806	1.05147	3.2999	0.732317	1.21529
	568.458	0.0102679		0.90425	1.01928	3.04892	0.815751	1.18521
	568.958	0.0338086		0.887373	0.998002	2.77835	0.950294	1.16086
	569.458	0.0549646		0.83885	0.991266	2.48051	1.1584	1.14606
	569.958	0.0735268		0.744359	1.00271	2.14771	1.46253	1.14459
	570.458	0.0884791		0.849549	0.983049	2.00348	1.82508	1.10538
	570.958	0.101614		0.930458	0.979682	1.89065	1.98674	1.05091
	571.458	0.111477		1.01483	0.979065	1.80519	2.17092	1.00522
	571.958	0.116935		1.09804	0.980933	1.74387	2.37677	0.965364
	572.458	0.116627		1.1755	0.985022	1.70349	2.60341	0.928397
	572.958	0.110608		1.24259	0.991067	1.68082	2.84998	0.891378
	573.458	0.0991829		1.29471	0.998805	1.67266	3.11561	0.851362
	573.958	0.0835023		1.32723	1.00797	1.67578	3.39943	0.805406
	574.458	0.062963		1.33557	1.0183	1.68696	3.70058	0.750567
	574.958	0.0393851		1.3151	1.02952	1.703	4.01819	0.683902
	575.458	0.0143738		1.42062	1.13984	1.75138	3.84262	0.632785
	575.958	-0.00984826		1.23677	1.06306	1.69328	4.35198	0.588615
	576.458	-0.0326914		1.11389	0.996719	1.59065	4.60222	0.552903
	576.958	-0.0530721		1.04327	0.940231	1.45886	4.62993	0.526865
	577.458	-0.0720153		1.01618	0.893001	1.31325	4.47169	0.511714
	577.958	-0.088476		1.02387	0.854433	1.16917	4.16409	0.508664
	578.458	-0.101665		1.05763	0.823933	1.04198	3.74374	0.51893
	578.958	-0.110905		1.10872	0.800907	0.947038	3.24721	0.543726
	579.458	-0.115918		1.16841	0.784761	0.899686	2.71109	0.584265
	579.958	-0.116214		1.22797	0.7749	0.91528	2.17198	0.641763
	580.458	-0.111864		1.32731	0.821858	0.966961	1.35682	0.712926
	580.958	-0.100514		1.25909	0.731389	0.969797	1.18581	0.721871
	581.458	-0.0836835		1.20521	0.66886	0.983432	1.02744	0.728621
	581.958	-0.0627845		1.16518	0.630242	1.00654	0.87932	0.734184
	582.458	-0.0394092		1.13852	0.611508	1.03778	0.739097	0.73957
	582.958	-0.0147186		1.12474	0.608628	1.07584	0.604403	0.745786
	583.458	0.0101946		1.12335	0.617574	1.11939	0.472872	0.753839
	583.958	0.0341183		1.13387	0.634316	1.16709	0.34214	0.764739
	584.458	0.0553346		1.15579	0.654826	1.21762	0.209841	0.779493
	584.958	0.0737419		1.18863	0.675076	1.26965	0.0736084	0.79911
	585.458	0.0885409		1.1488	0.720967	1.34088	0.0534191	0.798079
	585.958	0.101323		1.24625	0.7304	1.45001	0.0262673	0.818016
	586.458	0.110999		1.26724	0.743901	1.48641	0.0168145	0.820087
	586.958	0.116443		1.22409	0.759781	1.4667	0.0200193	0.808001
	587.458	0.116098		1.12911	0.77635	1.40752	0.0308401	0.785463
	587.958	0.110104		0.994619	0.79192	1.32548	0.0442356	0.75618
	588.458	0.0987868		0.832939	0.804802	1.23721	0.0551642	0.72386
	588.958	0.0833119		0.656386	0.813307	1.15935	0.0585844	0.692208
	589.458	0.0628868		0.477274	0.815746	1.10851	0.0494549	0.664931
	589.958	0.0392184		0.307921	0.81043	1.10132	0.022734	0.645737
	590.458	0.0140077		0.298599	0.834288	1.11796	0.0160864	0.654816
	590.958	-0.0102912		0.331708	0.791632	1.13694	0	0.671243
	591.458	-0.0331107		0.403007	0.760136	1.1458	0.0198645	0.675517
	591.958	-0.0533484		0.496235	0.740516	1.1469	0.0710916	0.669521
	592.458	-0.0721698		0.595131	0.73349	1.1426	0.149093	0.655137
	592.958	-0.088549		0.683433	0.739776	1.13526	0.24928	0.634248
	593.458	-0.101731		0.74488	0.760091	1.12726	0.367064	0.608738
	593.958	-0.111004		0.763211	0.795153	1.12096	0.497857	0.580488
	594.458	-0.116069		0.722164	0.84568	1.11873	0.637071	0.551382
	594.958	-0.116525		0.605479	0.912388	1.12293	0.780118	0.523302
	595.458	-0.112778		0.4127	0.965215	1.15497	0.851116	0.514903
	595.958	-0.105764		0.415903	1.0257	1.12233	1.04187	0.492499
	596.458	-0.0933587		0.419111	1.08638	1.08957	1.23326	0.470014
	596.958	-0.0759794		0.422323	1.14726	1.05669	1.42528	0.447447
	597.458	-0.0599316		0.425541	1.20833	1.02369	1.61794	0.424798
	597.958	-0.0402079		0.428763	1.2696	0.99057	1.81123	0.402067
	598.458	-0.018467		0.43199	1.33106	0.957332	2.00515	0.379255
	598.958	0.00414521		0.435222	1.39272	0.923974	2.19972	0.35636
	599.458	0.0247534		0.438459	1.45458	0.890497	2.39492	0.333382
	599.958	0.0676271		0.4417	1.51663	0.8569	2.59076	0.310323
	600.458			0.444947	1.57888	0.823183	2.78723	0.287181
	Time (s)	Temperature change (Celsius/s)		Calcium activity of AIY (dR/R0)	AVA	RME	SMDD	SMDV
Animal 2	0.4617	-0.118882		0.495602	7.50254		1.18154	16.0821
	0.9617	-0.0414999		0.460965	6.14537		1.23733	13.3757
	1.4617	-0.00563916		0.436977	5.35327		1.26704	12.1477
	1.9617	0.0316924		0.422375	5.01307		1.275	11.9912
	2.4617	0.0600362		0.415895	5.01155		1.26556	12.4994
	2.9617	0.0782797		0.416275	5.23552		1.24304	13.2655
	3.4617	0.0868547		0.422253	5.57178		1.21178	13.8826
	3.9617	0.104112		0.432565	5.90713		1.17613	13.9439
	4.4617	0.113588		0.445949	6.12837		1.14041	13.0426
	4.9617	0.116093		0.461143	6.12231		1.10896	10.7718
	5.4617	0.117503		0.446061	6.39011		0.90399	11.7999
	5.9617	0.112036		0.50837	5.96067		0.896323	12.8728
	6.4617	0.100417		0.571941	5.66043		0.888645	13.866
	6.9617	0.0838809		0.635039	5.4621		0.879311	14.7285
	7.4617	0.0636054		0.695927	5.33836		0.866678	15.4093
	7.9617	0.0406208		0.752869	5.26191		0.849102	15.8576
	8.4617	0.0159731		0.804127	5.20543		0.824938	16.0222
	8.9617	-0.00956918		0.847967	5.14164		0.792543	15.8523
	9.4617	-0.0334345		0.882651	5.0432		0.750273	15.2969
	9.9617	-0.0549475		0.906443	4.88283		0.696482	14.3049
	10.4617	-0.0732382		1.0361	4.30502		0.667489	14.896
	10.9617	-0.0893835		0.918581	4.19235		0.675288	15.1139
	11.4617	-0.102636		0.78715	4.05705		0.671454	15.3887
	11.9617	-0.112624		0.649028	3.91371		0.659062	15.7168
	12.4617	-0.117269		0.511436	3.77694		0.641186	16.0947
	12.9617	-0.116485		0.381592	3.66132		0.6209	16.5188
	13.4617	-0.11033		0.266717	3.58145		0.601279	16.9856
	13.9617	-0.0996934		0.174032	3.55192		0.585395	17.4916
	14.4617	-0.0835855		0.110756	3.58733		0.576324	18.0331
	14.9617	-0.0628182		0.0841093	3.70226		0.57714	18.6067
	15.4617	-0.0390686		0.0671009	3.67958		0.565804	20.5631
	15.9617	-0.0144272		0.065572	4.18823		0.563726	18.8956
	16.4617	0.0101425		0.0859876	4.54785		0.608541	17.9997
	16.9617	0.0330372		0.12336	4.79388		0.690373	17.7183
	17.4617	0.0547307		0.1727	4.96175		0.799351	17.8948
	17.9617	0.0740886		0.229021	5.0869		0.925601	18.3722
	18.4617	0.0901126		0.287333	5.20479		1.05925	18.9937
	18.9617	0.103039		0.34265	5.35086		1.19042	19.6025
	19.4617	0.111806		0.389982	5.56054		1.30925	20.0417
	19.9617	0.116215		0.424343	5.86928		1.40586	20.1545
	20.4617	0.117166		0.482495	6.39652		1.40985	19.2089
	20.9617	0.111439		0.503169	6.51875		1.34495	17.6022
	21.4617	0.0996187		0.582186	6.66054		1.3167	16.0828
	21.9617	0.0834388		0.70236	6.81024		1.31775	14.6806
	22.4617	0.0632474		0.846503	6.95619		1.34076	13.4251
	22.9617	0.0401672		0.99743	7.08673		1.37837	12.3462
	23.4617	0.0153148		1.13795	7.19022		1.42325	11.4735
	23.9617	-0.0105217		1.25089	7.25498		1.46804	10.8367
	24.4617	-0.0343812		1.31905	7.26937		1.5054	10.4655
	24.9617	-0.0553702		1.32525	7.22172		1.52799	10.3897
	25.4617	-0.0735178		1.20123	7.03669		1.33965	10.7705
	25.9617	-0.0893742		1.14276	6.90157		1.43208	10.4637
	26.4617	-0.102341		1.08341	6.73386		1.49607	10.0079
	26.9617	-0.112265		1.02352	6.53989		1.54342	9.45776
	27.4617	-0.11694		0.963435	6.32603		1.58592	8.86799
	27.9617	-0.116343		0.903489	6.09861		1.63539	8.29325
	28.4617	-0.110623		0.844024	5.864		1.70362	7.7882
	28.9617	-0.100332		0.78538	5.62854		1.80241	7.40753
	29.4617	-0.0842938		0.727897	5.39857		1.94356	7.2059
	29.9617	-0.063431		0.671914	5.18047		2.13888	7.23799
	30.4617	-0.0390817		0.646253	4.95054		2.31493	7.53232
	30.9617	-0.0141915		0.560665	4.86109		2.44797	8.23754
	31.4617	0.0101517		0.516195	4.76397		2.55861	8.58043
	31.9617	0.0326949		0.503067	4.66085		2.64987	8.66204
	32.4617	0.0541497		0.511506	4.5534		2.72477	8.58344
	32.9617	0.0733643		0.531735	4.44331		2.78633	8.44566
	33.4617	0.0893748		0.553981	4.33224		2.83759	8.34976
	33.9617	0.102094		0.568465	4.22187		2.88155	8.39681
	34.4617	0.111004		0.565414	4.11389		2.92125	8.68783
	34.9617	0.115929		0.535051	4.00996		2.95971	9.3239
	35.4617	0.117159		0.518123	4.2718		2.75298	9.54399
	35.9617	0.111428		0.416781	4.0018		2.58131	11.109
	36.4617	0.0995138		0.39122	3.87068		2.40528	12.0954
	36.9617	0.082914		0.426243	3.85785		2.23825	12.6502
	37.4617	0.0625341		0.506654	3.94275		2.09356	12.9202
	37.9617	0.0394643		0.617257	4.10479		1.98457	13.0524
	38.4617	0.0147583		0.742856	4.32339		1.92463	13.1937
	38.9617	-0.0106754		0.868256	4.57797		1.92709	13.4909
	39.4617	-0.0341873		0.978261	4.84796		2.0053	14.091
	39.9617	-0.0551573		1.05767	5.11277		2.17261	15.1409
	40.4617	-0.0731805		0.939885	5.5261		2.20283	15.8758
	40.9617	-0.0890733		0.976155	5.36104		2.22728	16.8433
	41.4617	-0.102188		0.957187	5.3402		2.22979	16.8576
	41.9617	-0.112085		0.896255	5.42926		2.21534	16.1819
	42.4617	-0.11664		0.806631	5.59388		2.18895	15.0798
	42.9617	-0.115823		0.701591	5.79974		2.15562	13.8146
	43.4617	-0.109726		0.594407	6.0125		2.12035	12.6496
	43.9617	-0.0991075		0.498352	6.19784		2.08813	11.8482
	44.4617	-0.0830733		0.426701	6.32143		2.06398	11.6738
	44.9617	-0.0625401		0.392727	6.34894		2.05289	12.3899
	45.4617	-0.0385762		0.281122	6.2399		1.91618	11.8115
	45.9617	-0.0139727		0.33102	6.53363		2.23181	11.9604
	46.4617	0.0103839		0.371567	6.57198		2.48354	12.3904
	46.9617	0.0331466		0.403614	6.40426		2.69582	12.9982
	47.4617	0.0548205		0.428014	6.07975		2.89308	13.6802
	47.9617	0.074304		0.445618	5.64774		3.09976	14.3332
	48.4617	0.0906692		0.457277	5.15751		3.34031	14.8535
	48.9617	0.103395		0.463843	4.65837		3.63916	15.1379
	49.4617	0.112049		0.466167	4.19958		4.02076	15.0828
	49.9617	0.116435		0.465101	3.83045		4.50954	14.5849
	50.4617	0.117608		0.490686	3.6784		5.88395	14.0854
	50.9617	0.111745		0.445496	3.78826		5.90888	12.8886
	51.4617	0.0998586		0.439643	3.83453		5.93924	11.5682
	51.9617	0.0831661		0.470217	3.82434		5.97425	10.1933
	52.4617	0.0627732		0.534306	3.76484		6.01313	8.83298
	52.9617	0.0398187		0.629001	3.66317		6.05508	7.55654
	53.4617	0.0153363		0.751392	3.52648		6.09931	6.43308
	53.9617	-0.0103624		0.898568	3.36191		6.14504	5.53177
	54.4617	-0.0338718		1.06762	3.17661		6.19149	4.92175
	54.9617	-0.0549447		1.25564	2.97771		6.23785	4.67219
	55.4617	-0.0730165		1.28225	2.82944		6.2498	4.73215
	55.9617	-0.0888484		1.50445	2.5786		6.19848	3.98169
	56.4617	-0.101934		1.57424	2.37135		6.12363	3.56281
	56.9617	-0.112424		1.52553	2.20264		6.04027	3.39798
	57.4617	-0.117312		1.39219	2.06738		5.96341	3.40966
	57.9617	-0.116687		1.20814	1.96053		5.90806	3.5203
	58.4617	-0.110648		1.00726	1.87701		5.88923	3.65237
	58.9617	-0.099936		0.823437	1.81178		5.92194	3.72833
	59.4617	-0.083974		0.690575	1.75975		6.02121	3.67063
	59.9617	-0.0636012		0.642565	1.71587		6.20204	3.40174
	60.4617	-0.0391296		0.562075	1.60332		6.14244	3.39984
	60.9617	-0.0145131		0.562947	1.63339		6.21283	2.63363
	61.4617	0.00972743		0.580076	1.60412		6.30486	2.28076
	61.9617	0.0325114		0.60818	1.53392		6.42478	2.31046
	62.4617	0.0541578		0.641978	1.44119		6.57885	2.69195
	62.9617	0.0736477		0.676188	1.34434		6.77332	3.39444
	63.4617	0.0900705		0.70553	1.26178		7.01444	4.38715
	63.9617	0.102741		0.724721	1.21191		7.30846	5.63931
	64.4617	0.111552		0.728481	1.21313		7.66163	7.12013
	64.9617	0.116154		0.711528	1.28387		8.08021	8.79882
	65.4617	0.117338		0.716799	1.38187		8.16289	8.80082
	65.9617	0.111775		0.710545	1.68573		8.23132	9.65924
	66.4617	0.100213		0.709184	2.09627		8.24808	9.64878
	66.9617	0.083539		0.714086	2.56764		8.21419	9.01899
	67.4617	0.0631288		0.72662	3.05398		8.13065	8.0194
	67.9617	0.0400278		0.748154	3.50945		7.99849	6.89956
	68.4617	0.0152336		0.780058	3.88818		7.81872	5.90901
	68.9617	-0.0107772		0.823699	4.14434		7.59235	5.29728
	69.4617	-0.034746		0.880448	4.23206		7.3204	5.31393
	69.9617	-0.056094		0.951672	4.10549		7.00389	6.20848
	70.4617	-0.0738928		0.970958	4.17473		6.77456	5.81093
	70.9617	-0.0895204		0.999056	4.17753		6.49755	5.61835
	71.4617	-0.102443		0.991153	4.21505		6.28508	5.61561
	71.9617	-0.112682		0.953701	4.2768		6.12003	5.75734
	72.4617	-0.11751		0.89315	4.35232		5.98532	5.99818
	72.9617	-0.116913		0.815954	4.43114		5.86382	6.29278
	73.4617	-0.110978		0.728563	4.50279		5.73843	6.59575
	73.9617	-0.100427		0.637429	4.55679		5.59205	6.86175
	74.4617	-0.0843161		0.549004	4.58267		5.40757	7.04541
	74.9617	-0.0634278		0.469741	4.56996		5.16788	7.10137
	75.4617	-0.0388961		0.30994	4.40704		4.58638	8.80474
	75.9617	-0.0139387		0.366936	4.59092		4.6703	6.92879
	76.4617	0.0105894		0.397224	4.7821		4.73597	5.87182
	76.9617	0.0333577		0.40645	4.96928		4.77779	5.48325
	77.4617	0.0548625		0.400261	5.14118		4.79016	5.61244
	77.9617	0.0740308		0.384303	5.28652		4.76748	6.1088
	78.4617	0.0899291		0.364221	5.39401		4.70415	6.82172
	78.9617	0.102567		0.345663	5.45238		4.59458	7.60058
	79.4617	0.111329		0.334275	5.45032		4.43317	8.29478
	79.9617	0.115987		0.335702	5.37657		4.21431	8.75371
	80.4617	0.117235		0.330463	5.2346		4.33058	9.79727
	80.9617	0.111477		0.333206	5.01858		3.77176	9.48527
	81.4617	0.0995317		0.313346	4.71633		3.47669	9.39382
	81.9617	0.083016		0.282041	4.35628		3.40219	9.45784
	82.4617	0.0627754		0.250454	3.96688		3.50502	9.61224
	82.9617	0.0398979		0.229746	3.57655		3.742	9.79196
	83.4617	0.0154063		0.231078	3.21373		4.0699	9.9319
	83.9617	-0.0100468		0.265611	2.90686		4.44553	9.96699
	84.4617	-0.033271		0.344506	2.68436		4.82567	9.83215
	84.9617	-0.0538485		0.478924	2.57468		5.16712	9.46229
	85.4617	-0.0715446		0.505655	2.44995		5.15347	9.79324
	85.9617	-0.0872469		0.544776	2.35018		4.67907	8.64621
	86.4617	-0.100432		0.55269	2.2413		4.0934	7.94885
	86.9617	-0.110929		0.535732	2.13008		3.45523	7.62561
	87.4617	-0.116011		0.50024	2.02329		2.82337	7.60089
	87.9617	-0.115702		0.452551	1.92769		2.25661	7.79913
	88.4617	-0.110071		0.399003	1.85005		1.81373	8.14476
	88.9617	-0.0999019		0.345931	1.79714		1.55354	8.56218
	89.4617	-0.0841909		0.299673	1.77573		1.53483	8.97584
	89.9617	-0.0636931		0.266566	1.79259		1.81638	9.31015
	90.4617	-0.0394871		0.194106	1.88574		1.658	10.0977
	90.9617	-0.0151157		0.143173	1.96166		1.62414	9.90569
	91.4617	0.00885872		0.101308	2.03347		1.58677	9.80356
	91.9617	0.0312187		0.0677866	2.09603		1.54699	9.76293
	92.4617	0.0525996		0.0418853	2.14423		1.50593	9.75537
	92.9617	0.0719423		0.02288	2.17292		1.46467	9.75247
	93.4617	0.0882581		0.0100466	2.17699		1.42432	9.72581
	93.9617	0.101265		0.00266129	2.1513		1.38598	9.64697
	94.4617	0.110618		0	2.09073		1.35076	9.48753
	94.9617	0.115778		0.0013388	1.99014		1.31977	9.21907
	95.4617	0.117657		0.0320685	1.82254		1.28997	8.91225
	95.9617	0.112328		0.109961	1.70395		1.24312	8.68941
	96.4617	0.100579		0.241273	1.57823		1.19726	8.45184
	96.9617	0.0838453		0.410385	1.44882		1.15261	8.20395
	97.4617	0.0634403		0.60168	1.31914		1.10944	7.95017
	97.9617	0.0404227		0.79954	1.19263		1.06797	7.6949
	98.4617	0.0158384		0.988347	1.07273		1.02844	7.44256
	98.9617	-0.0100068		1.15248	0.962856		0.991096	7.19756
	99.4617	-0.0337629		1.27633	0.866455		0.956178	6.96431
	99.9617	-0.0550429		1.34426	0.786956		0.923925	6.74723
	100.462	-0.0729969		1.40264	0.723938		0.939909	6.46637
	100.962	-0.0890988		1.32725	0.711612		0.857138	6.141
	101.462	-0.10252		1.225	0.697061		0.802627	5.87847
	101.962	-0.113227		1.10368	0.680299		0.770417	5.67463
	102.462	-0.118202		0.971106	0.66134		0.754546	5.52536
	102.962	-0.117444		0.835063	0.6402		0.749054	5.42654
	103.462	-0.111034		0.703354	0.616893		0.74798	5.37401
	103.962	-0.100258		0.583779	0.591433		0.745364	5.36366
	104.462	-0.0840494		0.484136	0.563834		0.735244	5.39136
	104.962	-0.0634821		0.412225	0.534112		0.71166	5.45296
	105.462	-0.0394771		0.30861	0.523052		0.697111	5.48908
	105.962	-0.0150058		0.241592	0.502692		0.692236	5.63349
	106.462	0.00933774		0.194105	0.483348		0.68714	5.70892
	106.962	0.0319147		0.163937	0.464216		0.681689	5.72361
	107.462	0.0535961		0.148877	0.444494		0.67575	5.68579
	107.962	0.0732705		0.146715	0.42338		0.669191	5.60371
	108.462	0.0899742		0.155241	0.400072		0.661878	5.48559
	108.962	0.103452		0.172243	0.373765		0.653679	5.33966
	109.462	0.112582		0.195511	0.343659		0.644461	5.17417
	109.962	0.116947		0.222834	0.30895		0.634091	4.99735
	110.462	0.117576		0.261706	0.239911		0.589622	5.13882
	110.962	0.111449		0.34613	0.172884		0.468276	5.31768
	111.462	0.0994313		0.42827	0.115033		0.410801	5.52382
	111.962	0.0830022		0.509786	0.0675894		0.403488	5.74242
	112.462	0.0626809		0.59234	0.0317826		0.43263	5.95868
	112.962	0.0396025		0.677591	0.00884273		0.484519	6.15777
	113.462	0.014879		0.767199	0		0.545447	6.32489
	113.962	-0.0106513		0.862827	0.00648447		0.601705	6.4452
	114.462	-0.0344869		0.966134	0.0295262		0.639586	6.50389
	114.962	-0.0559033		1.07878	0.0703554		0.645382	6.48616
	115.462	-0.0743778		1.07749	0.0684261		0.61576	6.80505
	115.962	-0.0904296		1.06416	0.0705428		0.537424	6.99757
	116.462	-0.103403		1.00861	0.0743666		0.474283	7.26013
	116.962	-0.112995		0.920763	0.0796858		0.425752	7.58256
	117.462	-0.117316		0.810511	0.0862881		0.391246	7.9547
	117.962	-0.116336		0.687758	0.0939617		0.370181	8.36641
	118.462	-0.110179		0.562408	0.102495		0.361972	8.80753
	118.962	-0.0995641		0.444362	0.111675		0.366034	9.26789
	119.462	-0.0833867		0.343523	0.12129		0.381784	9.73734
	119.962	-0.0625128		0.269794	0.131128		0.408635	10.2057
	120.462	-0.0385937		0.36479	0.181789		0	9.68611
	120.962	-0.0138811		0.163472	0.17192		0.333136	10.3456
	121.462	0.0105688		0.0884253	0.213303		0.645032	10.8474
	121.962	0.0333151		0.109533	0.293935		0.921212	11.1847
	122.462	0.0549523		0.196682	0.401814		1.1472	11.3507
	122.962	0.0743136		0.319757	0.524939		1.3085	11.3385
	123.462	0.0903882		0.448644	0.651307		1.39066	11.1414
	123.962	0.103302		0.553227	0.768916		1.37919	10.7526
	124.462	0.112194		0.603393	0.865764		1.25961	10.1652
	124.962	0.116864		0.569026	0.929849		1.01744	9.37238
	125.462	0.117966		0.303193	1.00283		0.762767	8.77075
	125.962	0.112161		0.254402	1.12641		0.798633	8.79713
	126.462	0.100147		0.226217	1.22407		0.797154	9.02606
	126.962	0.083632		0.216456	1.29499		0.767684	9.39133
	127.462	0.0632158		0.222939	1.3383		0.71958	9.82675
	127.962	0.0400307		0.243488	1.35315		0.662199	10.2661
	128.462	0.0151857		0.275921	1.3387		0.604895	10.6432
	128.962	-0.0105477		0.318059	1.29409		0.557025	10.8918
	129.462	-0.0343086		0.367721	1.21848		0.527945	10.9457
	129.962	-0.0553804		0.422727	1.11101		0.52701	10.7387
	130.462	-0.0735976		0.499742	1.03103		0.519629	11.2146
	130.962	-0.0894679		0.482639	1.00206		0.528001	10.6999
	131.462	-0.102419		0.449068	0.952847		0.529118	10.6489
	131.962	-0.112274		0.405514	0.911717		0.527168	10.9422
	132.462	-0.11682		0.358462	0.90698		0.526337	11.4603
	132.962	-0.116049		0.314398	0.966948		0.530814	12.0835
	133.462	-0.110058		0.279805	1.11994		0.544785	12.6924
	133.962	-0.099542		0.26117	1.39426		0.572436	13.1674
	134.462	-0.0835442		0.264977	1.81822		0.617956	13.389
	134.962	-0.0628552		0.297711	2.42015		0.685532	13.2377
	135.462	-0.0388677		0.384022	2.6614		0.729017	14.4099
	135.962	-0.0144009		0.370368	2.85688		0.701709	14.4115
	136.462	0.00972041		0.432992	3.10752		0.772907	14.2797
	136.962	0.0322196		0.550956	3.39444		0.917563	14.0288
	137.462	0.0536128		0.703319	3.69878		1.11063	13.6731
	137.962	0.0728109		0.869143	4.00169		1.32707	13.227
	138.462	0.0888364		1.02749	4.2843		1.54182	12.7046
	138.962	0.10171		1.15742	4.52774		1.72984	12.1203
	139.462	0.110848		1.23799	4.71315		1.86609	11.4884
	139.962	0.115875		1.24826	4.82168		1.92552	10.8231
	140.462	0.117167		1.38882	4.94071		1.90976	10.2754
	140.962	0.111644		1.16733	4.83641		1.82941	10.8334
	141.462	0.0999245		0.991004	4.80202		1.72443	11.726
	141.962	0.0835608		0.853038	4.82794		1.60375	12.8198
	142.462	0.0634336		0.746628	4.90456		1.47629	13.9818
	142.962	0.0405664		0.664971	5.02226		1.35099	15.0786
	143.462	0.0159962		0.601262	5.17143		1.23676	15.9769
	143.962	-0.00941455		0.548698	5.34246		1.14254	16.5436
	144.462	-0.033012		0.500476	5.52575		1.07724	16.6453
	144.962	-0.0541117		0.449792	5.71167		1.0498	16.1489
	145.462	-0.0725971		0.457614	5.88679		0.95941	16.4542
	145.962	-0.089001		0.422586	5.96553		0.959964	15.0958
	146.462	-0.102612		0.381103	6.00353		0.962558	14.2398
	146.962	-0.112991		0.337869	6.00909		0.965751	13.7368
	147.462	-0.118005		0.297592	5.99052		0.968099	13.4377
	147.962	-0.117589		0.264978	5.95614		0.96816	13.1934
	148.462	-0.111808		0.244734	5.91427		0.964492	12.8547
	148.962	-0.101206		0.241566	5.87321		0.955652	12.2725
	149.462	-0.0851243		0.260181	5.84128		0.940198	11.2977
	149.962	-0.0644061		0.305285	5.82679		0.916688	9.78092
	150.462	-0.0398584		0.304894	5.88757		0.962288	9.2384
	150.962	-0.0150358		0.377041	5.86531		0.962934	7.31719
	151.462	0.0093478		0.437094	5.85567		0.97735	5.92352
	151.962	0.0322512		0.485911	5.84801		1.00101	4.97143
	152.462	0.0539903		0.52435	5.83171		1.02939	4.37496
	152.962	0.0735313		0.553271	5.79611		1.05797	4.04816
	153.462	0.0899471		0.573533	5.73058		1.08221	3.90506
	153.962	0.102524		0.585994	5.62449		1.0976	3.85969
	154.462	0.11158		0.591512	5.46718		1.09961	3.82611
	154.962	0.116634		0.590948	5.24803		1.08371	3.71835
	155.462	0.118036		0.738055	5.14811		1.01676	3.73804
	155.962	0.112602		0.818073	4.92999		1.17737	3.76611
	156.462	0.101018		0.914893	4.74029		1.24937	3.97083
	156.962	0.0841224		1.02228	4.5794		1.25182	4.32066
	157.462	0.0637248		1.13402	4.44768		1.20377	4.78403
	157.962	0.0407775		1.24386	4.34552		1.12427	5.3294
	158.462	0.0162567		1.34558	4.2733		1.03237	5.9252
	158.962	-0.00923124		1.43296	4.23139		0.947143	6.5399
	159.462	-0.0327752		1.49975	4.22018		0.887628	7.14192
	159.962	-0.0538523		1.53973	4.24005		0.872882	7.69973
	160.462	-0.0717157		1.86552	4.27077		0.774459	7.93421
	160.962	-0.0878647		1.62629	4.23542		0.950976	8.39442
	161.462	-0.101471		1.40198	4.26518		1.05697	8.76443
	161.962	-0.112179		1.1967	4.35661		1.10765	9.04783
	162.462	-0.117436		1.01458	4.50626		1.11824	9.2482
	162.962	-0.11718		0.859737	4.71066		1.10394	9.36913
	163.462	-0.111479		0.736299	4.96638		1.07998	9.41421
	163.962	-0.100878		0.648386	5.26995		1.06157	9.38701
	164.462	-0.0847562		0.600122	5.61792		1.06393	9.29113
	164.962	-0.0640637		0.595627	6.00685		1.10226	9.13015
	165.462	-0.0395264		0.417456	6.3484		1.5117	8.79272
	165.962	-0.0147014		0.615548	6.61037		1.27876	8.76192
	166.462	0.00970238		0.717601	6.82816		1.13338	8.60493
	166.962	0.0326716		0.742869	6.99477		1.06984	8.34834
	167.462	0.0545411		0.710604	7.10318		1.08239	8.01878
	167.962	0.0742471		0.64006	7.14635		1.16531	7.64283
	168.462	0.0908555		0.550488	7.11728		1.31286	7.24711
	168.962	0.103683		0.461142	7.00894		1.5193	6.85823
	169.462	0.11268		0.391276	6.81431		1.77891	6.50279
	169.962	0.117443		0.36014	6.52637		2.08594	6.20739
	170.462	0.118389		0.130526	6.18435		2.63139	5.89263
	170.962	0.112535		0.313626	5.77243		2.74622	5.9789
	171.462	0.100636		0.463048	5.52047		2.79196	5.91821
	171.962	0.0836161		0.584636	5.39373		2.78932	5.73279
	172.462	0.06295		0.684233	5.35749		2.759	5.44482
	172.962	0.0396791		0.767685	5.37703		2.7217	5.07652
	173.462	0.0148431		0.840836	5.41762		2.69811	4.65009
	173.962	-0.0109026		0.909529	5.44453		2.70894	4.18774
	174.462	-0.0347233		0.97961	5.42304		2.7749	3.71166
	174.962	-0.0559939		1.05692	5.31844		2.91667	3.24407
	175.462	-0.0737735		1.04152	5.09585		3.24211	3.28973
	175.962	-0.089556		1.1539	5.04527		3.65264	3.08375
	176.462	-0.102615		1.19258	4.91634		4.07098	3.00812
	176.962	-0.112698		1.1734	4.73167		4.49809	3.02671
	177.462	-0.117462		1.11219	4.5139		4.93494	3.1034
	177.962	-0.116867		1.0248	4.28566		5.38251	3.20204
	178.462	-0.111006		0.927066	4.06958		5.84176	3.28653
	178.962	-0.100601		0.834829	3.88829		6.31367	3.32072
	179.462	-0.0846266		0.763927	3.7644		6.7992	3.26849
	179.962	-0.0639851		0.730201	3.72057		7.29933	3.09371
	180.462	-0.0395113		0.658814	3.55682		7.83585	2.98666
	180.962	-0.0147531		0.663868	3.44115		8.04457	2.71705
	181.462	0.00950741		0.68015	3.31893		8.24299	2.48669
	181.962	0.0320329		0.705158	3.20897		8.4325	2.3447
	182.462	0.0534976		0.736385	3.13003		8.61452	2.34022
	182.962	0.0728189		0.771328	3.10091		8.79044	2.52236
	183.462	0.0890345		0.807483	3.1404		8.96165	2.94027
	183.962	0.101571		0.842345	3.26728		9.12958	3.64306
	184.462	0.110462		0.87341	3.50033		9.2956	4.67987
	184.962	0.115251		0.898174	3.85834		9.46113	6.09982
	185.462	0.116989		1.01492	3.99943		9.12925	4.90108
	185.962	0.111699		1.07177	4.11299		8.58265	4.97141
	186.462	0.100143		1.08133	4.21091		8.15574	4.97591
	186.962	0.0833915		1.05814	4.29592		7.83546	4.93274
	187.462	0.0630462		1.01674	4.37075		7.60878	4.86009
	187.962	0.0401451		0.971671	4.43812		7.46264	4.77611
	188.462	0.0157399		0.937469	4.50077		7.384	4.69898
	188.962	-0.0100297		0.928676	4.56143		7.35981	4.64688
	189.462	-0.0337796		0.959832	4.62282		7.37703	4.63797
	189.962	-0.0549696		1.04548	4.68767		7.42262	4.69042
	190.462	-0.0726184		1.01345	4.57371		7.41754	5.10322
	190.962	-0.0882976		1.10435	4.57948		7.33976	4.86527
	191.462	-0.101243		1.14459	4.58656		7.24763	4.78347
	191.962	-0.111678		1.14365	4.59077		7.14305	4.83504
	192.462	-0.116657		1.11097	4.58797		7.02789	4.99718
	192.962	-0.116154		1.05602	4.574		6.90403	5.24709
	193.462	-0.110246		0.98824	4.54471		6.77336	5.56199
	193.962	-0.0998577		0.917099	4.49593		6.63776	5.91907
	194.462	-0.0839788		0.852051	4.42353		6.49912	6.29554
	194.962	-0.0634642		0.802552	4.32333		6.3593	6.6686
	195.462	-0.0389553		0.86224	4.21512		6.24126	6.71535
	195.962	-0.0141837		0.81677	4.32591		6.01509	7.12627
	196.462	0.0102193		0.816693	4.45863		5.81168	7.40617
	196.962	0.0328902		0.847981	4.60671		5.62711	7.58212
	197.462	0.0545115		0.896606	4.76359		5.45748	7.68119
	197.962	0.0740141		0.948537	4.92272		5.29886	7.73045
	198.462	0.0903983		0.989747	5.07753		5.14734	7.75699
	198.962	0.103403		1.00621	5.22145		4.99901	7.78787
	199.462	0.112654		0.983884	5.34793		4.84996	7.85018
	199.962	0.117559		0.908753	5.4504		4.69628	7.97098
	200.462	0.118896		0.940888	5.59547		4.6207	7.88865
	200.962	0.113147		0.783799	5.56241		4.45217	7.76737
	201.462	0.10105		0.662042	5.54838		4.28793	7.70769
	201.962	0.0840417		0.569924	5.54187		4.12531	7.73321
	202.462	0.0634111		0.501751	5.53138		3.96164	7.86753
	202.962	0.040193		0.451829	5.50544		3.79428	8.13426
	203.462	0.0154481		0.414466	5.45253		3.62057	8.55699
	203.962	-0.0103051		0.383967	5.36117		3.43784	9.15934
	204.462	-0.0342047		0.354639	5.21985		3.24344	9.9649
	204.962	-0.0557947		0.320788	5.01709		3.03471	10.9973
	205.462	-0.0745785		0.306997	4.8894		2.85375	9.94203
	205.962	-0.0913259		0.243518	4.67363		2.57783	9.19231
	206.462	-0.105119		0.204396	4.49141		2.37813	8.49252
	206.962	-0.115676		0.183405	4.33614		2.23951	7.93203
	207.462	-0.120464		0.174316	4.20123		2.14681	7.60016
	207.962	-0.119451		0.170901	4.08006		2.08488	7.58626
	208.462	-0.112704		0.166931	3.96605		2.03857	7.97966
	208.962	-0.10111		0.15618	3.85261		1.99274	8.86971
	209.462	-0.0842161		0.132419	3.73312		1.93224	10.3457
	209.962	-0.0630775		0.0894201	3.601		1.84191	12.4971
	210.462	-0.0387444		0.0976351	3.51039		1.86386	12.2211
	210.962	-0.0140381		0.0862151	3.37597		1.87492	13.3403
	211.462	0.0104767		0.0826536	3.29816		1.88356	14.0695
	211.962	0.0335768		0.0860115	3.26604		1.88853	14.4642
	212.462	0.0555403		0.0953496	3.26869		1.88859	14.5798
	212.962	0.0752948		0.109729	3.2952		1.88251	14.4719
	213.462	0.0918945		0.128211	3.33465		1.86902	14.1961
	213.962	0.105048		0.149855	3.37612		1.8469	13.8077
	214.462	0.114013		0.173724	3.40869		1.81489	13.3623
	214.962	0.118311		0.198878	3.42143		1.77174	12.9155
	215.462	0.118793		0.25026	3.24665		1.81029	13.5651
	215.962	0.112444		0.354602	3.32912		1.78115	12.7584
	216.462	0.100135		0.492492	3.34955		1.74196	12.4582
	216.962	0.0833007		0.649755	3.32797		1.69597	12.4863
	217.462	0.0628379		0.812216	3.28438		1.64644	12.6647
	217.962	0.0398205		0.9657	3.23881		1.59664	12.8152
	218.462	0.0153021		1.09603	3.21127		1.54982	12.7598
	218.962	-0.0102234		1.18904	3.22177		1.50925	12.3203
	219.462	-0.0337945		1.23054	3.29034		1.47819	11.3188
	219.962	-0.054878		1.20636	3.43698		1.45991	9.57715
	220.462	-0.0727956		1.17813	3.46171		1.35752	8.35165
	220.962	-0.0887938		1.04387	3.83379		1.36781	5.93131
	221.462	-0.102048		0.916194	4.06751		1.36234	4.13195
	221.962	-0.112384		0.799713	4.18849		1.34526	2.87406
	222.462	-0.117248		0.699047	4.22235		1.32073	2.07814
	222.962	-0.116604		0.618811	4.1947		1.29292	1.66472
	223.462	-0.110564		0.563621	4.13118		1.26599	1.55428
	223.962	-0.100121		0.538093	4.0574		1.2441	1.66735
	224.462	-0.08397		0.546844	3.99897		1.23142	1.92441
	224.962	-0.0632255		0.594489	3.98152		1.23209	2.24598
	225.462	-0.0396045		0.595538	3.89684		1.27406	2.77734
	225.962	-0.01521		0.598362	3.93146		1.3847	3.03012
	226.462	0.00894098		0.606815	3.92085		1.46408	3.27815
	226.962	0.0312232		0.617363	3.86993		1.51053	3.5495
	227.462	0.0525801		0.626469	3.78362		1.52241	3.87225
	227.962	0.0718073		0.630599	3.66683		1.49804	4.27448
	228.462	0.0879341		0.626215	3.52449		1.43576	4.78427
	228.962	0.101327		0.609784	3.36151		1.33392	5.42969
	229.462	0.110444		0.577768	3.18281		1.19084	6.23883
	229.962	0.115261		0.526633	2.9933		1.00487	7.23975
	230.462	0.116864		0.538293	3.08604		0.832619	6.55034
	230.962	0.111299		0.448789	3.07682		0.720669	6.83659
	231.462	0.0995851		0.428786	3.01166		0.641027	7.45278
	231.962	0.0838334		0.468894	2.90177		0.588519	8.30364
	232.462	0.0639971		0.559722	2.75839		0.557971	9.29394
	232.962	0.0412984		0.691882	2.59272		0.544209	10.3284
	233.462	0.0168214		0.855982	2.416		0.542058	11.3118
	233.962	-0.00875592		1.04263	2.23944		0.546343	12.1488
	234.462	-0.0321902		1.24244	2.07427		0.551892	12.7442
	234.962	-0.0529694		1.44603	1.93171		0.553529	13.0028
	235.462	-0.0711221		1.58442	1.79392		0.569462	13.0369
	235.962	-0.0869891		1.71931	1.641		0.513845	13.4107
	236.462	-0.100187		1.76197	1.48577		0.498818	13.7186
	236.962	-0.110686		1.7293	1.35629		0.514692	14.0186
	237.462	-0.115836		1.63818	1.28062		0.551777	14.3688
	237.962	-0.115665		1.5055	1.2868		0.600384	14.8271
	238.462	-0.110273		1.34815	1.40289		0.650823	15.4518
	238.962	-0.100513		1.18302	1.65695		0.693404	16.3006
	239.462	-0.0849803		1.02699	2.07701		0.718437	17.4318
	239.962	-0.0644699		0.896962	2.69114		0.716234	18.9034
	240.462	-0.0399926		0.769293	3.10708		0.698218	19.2887
	240.962	-0.0152086		0.688337	3.92495		0.628259	18.7187
	241.462	0.00906495		0.671676	4.54646		0.598599	18.1452
	241.962	0.0313848		0.705236	5.0018		0.601576	17.6049
	242.462	0.0526984		0.774941	5.32113		0.629528	17.1349
	242.962	0.0718825		0.866717	5.53462		0.674792	16.772
	243.462	0.0879592		0.966489	5.67246		0.729707	16.5532
	243.962	0.100594		1.06018	5.76481		0.786611	16.5154
	244.462	0.109559		1.13372	5.84184		0.837841	16.6955
	244.962	0.114536		1.17303	5.93373		0.875735	17.1304
	245.462	0.116251		1.33768	6.04992		0.942979	16.1394
	245.962	0.111042		1.49165	6.15584		0.913914	16.0942
	246.462	0.0996112		1.60398	6.2725		0.897604	15.9437
	246.962	0.083199		1.68372	6.39313		0.891766	15.6853
	247.462	0.0630432		1.7399	6.51097		0.894119	15.3165
	247.962	0.0401856		1.78157	6.61926		0.902379	14.8343
	248.462	0.015646		1.81777	6.71121		0.914264	14.2363
	248.962	-0.00985011		1.85753	6.78006		0.92749	13.5196
	249.462	-0.0334589		1.9099	6.81905		0.939775	12.6817
	249.962	-0.0545055		1.9839	6.8214		0.948836	11.7198
	250.462	-0.0721722		2.21406	6.9086		0.744671	10.0973
	250.962	-0.0878522		2.16347	6.65648		1.00188	10.2688
	251.462	-0.100898		2.0685	6.37558		1.2773	10.2465
	251.962	-0.111027		1.94255	6.07505		1.56185	10.0571
	252.462	-0.115909		1.79903	5.76404		1.84643	9.72731
	252.962	-0.115457		1.65134	5.45169		2.12196	9.28385
	253.462	-0.109712		1.51291	5.14717		2.37934	8.75343
	253.962	-0.0995507		1.39713	4.85962		2.6095	8.16275
	254.462	-0.0837914		1.31741	4.59819		2.80334	7.53853
	254.962	-0.0632503		1.28717	4.37204		2.95177	6.90747
	255.462	-0.0393053		1.28056	4.18414		3.15468	5.89016
	255.962	-0.0146875		1.31837	3.90464		3.36395	5.92708
	256.462	0.00972977		1.35918	3.7018		3.59494	5.84896
	256.962	0.0324101		1.40125	3.56365		3.84777	5.70103
	257.462	0.0540462		1.44283	3.47823		4.12258	5.52849
	257.962	0.0735036		1.48221	3.43358		4.41949	5.37657
	258.462	0.0897801		1.51763	3.41773		4.73863	5.29049
	258.962	0.102802		1.54737	3.41872		5.08013	5.31545
	259.462	0.111801		1.5697	3.42458		5.44413	5.49667
	259.962	0.116393		1.58286	3.42334		5.83075	5.87939
	260.462	0.11764		1.65069	3.47983		6.88761	6.25245
	260.962	0.111877		1.70146	3.33534		6.56467	6.70206
	261.462	0.0998763		1.72145	3.1898		6.63451	7.10138
	261.962	0.0832501		1.71811	3.04693		7.00449	7.43778
	262.462	0.0628233		1.69889	2.91048		7.58199	7.69867
	262.962	0.0397127		1.67122	2.78415		8.27438	7.87141
	263.462	0.0150363		1.64256	2.67169		8.98903	7.9434
	263.962	-0.0107364		1.62035	2.57682		9.63331	7.90203
	264.462	-0.0345043		1.61205	2.50327		10.1146	7.73467
	264.962	-0.0556462		1.62508	2.45476		10.3403	7.42872
	265.462	-0.0742009		1.61777	2.20505		10.0312	6.44952
	265.962	-0.090601		1.59393	1.81955		9.24465	5.74683
	266.462	-0.104017		1.54633	1.63662		8.67133	5.2026
	266.962	-0.114385		1.48058	1.62014		8.27091	4.78794
	267.462	-0.119127		1.40227	1.73397		8.00308	4.47397
	267.962	-0.118259		1.31701	1.94201		7.82752	4.23183
	268.462	-0.111957		1.23039	2.20814		7.70393	4.03262
	268.962	-0.100723		1.14803	2.49622		7.592	3.84746
	269.462	-0.0840398		1.07551	2.77015		7.45143	3.64748
	269.962	-0.0630942		1.01844	2.9938		7.24191	3.40379
	270.462	-0.0384009		0.829108	2.92657		6.94424	3.23519
	270.962	-0.0134935		0.926137	2.79225		6.68751	3.43815
	271.462	0.010812		0.985795	2.7681		6.49886	3.5101
	271.962	0.0336206		1.01384	2.83237		6.36181	3.50098
	272.462	0.0553127		1.01605	2.96335		6.25991	3.46076
	272.962	0.0748115		0.998168	3.13929		6.1767	3.4394
	273.462	0.0912515		0.965969	3.33847		6.09571	3.48685
	273.962	0.103913		0.925211	3.53916		6.00048	3.65307
	274.462	0.112636		0.881659	3.71962		5.87456	3.98802
	274.962	0.117194		0.841075	3.85814		5.70147	4.54165
	275.462	0.117953		0.869413	4.02812		5.55231	5.69729
	275.962	0.111861		0.791023	3.98951		5.44504	5.92888
	276.462	0.0999233		0.719531	3.95253		5.30383	5.86902
	276.962	0.0830968		0.658219	3.91987		5.13234	5.62163
	277.462	0.0626965		0.610369	3.89421		4.93423	5.29063
	277.962	0.0397727		0.579266	3.87824		4.71317	4.97993
	278.462	0.015292		0.56819	3.87466		4.4728	4.79343
	278.962	-0.010165		0.580425	3.88615		4.21678	4.83506
	279.462	-0.0337452		0.619254	3.91541		3.94877	5.20873
	279.962	-0.055073		0.687959	3.96511		3.67244	6.01834
	280.462	-0.0731677		0.705412	3.90228		3.40281	6.61547
	280.962	-0.0891175		0.738798	4.03838		3.21662	6.53471
	281.462	-0.10233		0.734352	4.12843		3.04545	6.40678
	281.962	-0.112587		0.701157	4.17108		2.89405	6.26928
	282.462	-0.117387		0.648295	4.16496		2.76715	6.15985
	282.962	-0.116694		0.584849	4.10871		2.66952	6.11609
	283.462	-0.110555		0.519902	4.00097		2.60589	6.17564
	283.962	-0.0997379		0.462537	3.84038		2.581	6.37611
	284.462	-0.0834684		0.421836	3.62558		2.59961	6.75513
	284.962	-0.0625548		0.406882	3.3552		2.66645	7.35031
	285.462	-0.037971		0.422346	3.32976		2.73438	7.81648
	285.962	-0.0131443		0.395855	3.29691		2.82612	8.36713
	286.462	0.0112696		0.408657	3.2374		2.85429	9.1866
	286.962	0.0340198		0.451959	3.16628		2.83292	10.1173
	287.462	0.0555213		0.516967	3.09862		2.776	11.0016
	287.962	0.0747306		0.594891	3.04946		2.69754	11.682
	288.462	0.0907165		0.676936	3.03387		2.61156	12.0008
	288.962	0.103117		0.754311	3.0669		2.53206	11.8004
	289.462	0.111768		0.818223	3.16361		2.47305	10.9233
	289.962	0.116228		0.859879	3.33905		2.44855	9.21186
	290.462	0.117362		1.01265	3.55424		2.19046	8.31951
	290.962	0.111459		1.13734	3.79079		2.00957	6.42663
	291.462	0.099364		1.23942	3.92211		1.86666	5.07386
	291.962	0.0823838		1.32142	3.96209		1.75583	4.17777
	292.462	0.0619189		1.38588	3.92465		1.67115	3.65494
	292.962	0.0389875		1.43533	3.82367		1.60672	3.42193
	293.462	0.014574		1.47229	3.67307		1.5566	3.39533
	293.962	-0.0109683		1.49931	3.48675		1.51489	3.49172
	294.462	-0.0342983		1.51892	3.2786		1.47568	3.62766
	294.962	-0.055092		1.53365	3.06253		1.43304	3.71974
	295.462	-0.0726652		1.40356	2.75327		1.29171	4.91559
	295.962	-0.0885367		1.40764	2.84947		1.33461	4.19564
	296.462	-0.10194		1.32943	2.94134		1.32225	3.96487
	296.962	-0.112773		1.19593	3.03681		1.27045	4.12789
	297.462	-0.117977		1.03411	3.14375		1.195	4.58934
	297.962	-0.117542		0.870965	3.27006		1.11171	5.25383
	298.462	-0.111531		0.733473	3.42365		1.03639	6.02597
	298.962	-0.100938		0.648622	3.6124		0.984847	6.8104
	299.462	-0.0847503		0.643397	3.84422		0.972883	7.51173
	299.962	-0.0639662		0.744783	4.127		1.01631	8.03458
	300.462	-0.0392749		0.699279	4.63848		1.00874	8.01276
	300.962	-0.0144896		0.784414	4.83295		1.10689	7.9578
	301.462	0.00982416		0.814859	5.031		1.16728	7.71936
	301.962	0.0323141		0.806421	5.22639		1.19606	7.35823
	302.462	0.0537762		0.774908	5.41287		1.19939	6.93518
	302.962	0.0731408		0.736126	5.58421		1.1834	6.51101
	303.462	0.0894743		0.705882	5.73415		1.15427	6.14649
	303.962	0.102263		0.699984	5.85647		1.11813	5.90241
	304.462	0.111223		0.734238	5.94491		1.08115	5.83955
	304.962	0.115938		0.824452	5.99324		1.04947	6.01869
	305.462	0.117295		0.928277	5.8062		1.1483	5.91235
	305.962	0.111664		1.02874	5.73377		1.13609	6.67504
	306.462	0.0999019		1.08521	5.56452		1.14951	7.88995
	306.962	0.0831751		1.10805	5.31753		1.17888	9.36781
	307.462	0.0627722		1.10759	5.01188		1.2145	10.9193
	307.962	0.0397377		1.0942	4.66666		1.24668	12.3552
	308.462	0.0150726		1.07823	4.30096		1.26573	13.4862
	308.962	-0.0106474		1.07001	3.93386		1.26197	14.123
	309.462	-0.0343863		1.07992	3.58443		1.22571	14.0763
	309.962	-0.0556351		1.11828	3.27177		1.14726	13.1569
	310.462	-0.0735428		1.10505	3.04213		1.14253	14.189
	310.962	-0.0893392		1.1114	2.95587		1.00479	14.9678
	311.462	-0.102425		1.07331	2.86843		0.89542	15.7609
	311.962	-0.112655		1.00053	2.78164		0.809951	16.5506
	312.462	-0.117446		0.902871	2.69729		0.743907	17.3189
	312.962	-0.116772		0.790106	2.61719		0.692819	18.0482
	313.462	-0.110703		0.672021	2.54317		0.652213	18.7205
	313.962	-0.100102		0.558403	2.47702		0.617618	19.3181
	314.462	-0.0840146		0.459035	2.42056		0.584562	19.8232
	314.962	-0.0632119		0.383702	2.3756		0.548574	20.2179
	315.462	-0.0385444		0.28326	2.54923		0.476832	20.0233
	315.962	-0.0136269		0.287662	2.43142		0.469847	20.5158
	316.462	0.0108872		0.278663	2.29987		0.464186	20.6603
	316.962	0.0336582		0.261848	2.1668		0.461761	20.5505
	317.462	0.0552706		0.242805	2.04445		0.464485	20.2801
	317.962	0.0746903		0.227121	1.94504		0.47427	19.9429
	318.462	0.0909629		0.220382	1.88081		0.493029	19.6325
	318.962	0.103647		0.228175	1.86399		0.522674	19.4427
	319.462	0.112615		0.256087	1.9068		0.565117	19.4673
	319.962	0.117312		0.309706	2.02149		0.622271	19.7999
	320.462	0.118224		0.134545	2.27484		0.696652	19.0172
	320.962	0.112454		0.392703	2.34543		0.686768	20.2568
	321.462	0.100603		0.601123	2.48365		0.670135	21.339
	321.962	0.0837729		0.766174	2.67813		0.649846	22.1495
	322.462	0.0633674		0.894221	2.91752		0.628995	22.5736
	322.962	0.0403511		0.991631	3.19044		0.610677	22.4969
	323.462	0.0157466		1.06477	3.48554		0.597984	21.8048
	323.962	-0.00963866		1.12001	3.79146		0.59401	20.3828
	324.462	-0.0334017		1.1637	4.09683		0.601849	18.1163
	324.962	-0.0548821		1.20223	4.39029		0.624595	14.8909
	325.462	-0.0728567		1.28287	4.53214		0.55956	12.4445
	325.962	-0.0890772		1.42439	4.83903		0.5311	11.3918
	326.462	-0.102574		1.47756	5.05575		0.513612	10.9663
	326.962	-0.112747		1.46542	5.19879		0.506058	10.9822
	327.462	-0.11756		1.411	5.28463		0.507404	11.2535
	327.962	-0.116874		1.33734	5.32977		0.516614	11.5943
	328.462	-0.110716		1.26747	5.35069		0.532652	11.8188
	328.962	-0.100284		1.22442	5.36387		0.554483	11.7409
	329.462	-0.0842109		1.23125	5.38581		0.58107	11.1749
	329.962	-0.06352		1.31096	5.433		0.611378	9.93477
	330.462	-0.0398317		1.41284	5.47974		0.585587	10.5372
	330.962	-0.0154219		1.44153	5.67746		0.594705	10.8358
	331.462	0.00887118		1.41164	5.68785		0.619376	10.9416
	331.962	0.0312593		1.34015	5.54903		0.653623	10.8865
	332.462	0.0527424		1.24406	5.29909		0.69147	10.7025
	332.962	0.0721508		1.14035	4.97614		0.726941	10.4214
	333.462	0.0884695		1.046	4.6183		0.75406	10.0751
	333.962	0.10164		0.978013	4.26366		0.766851	9.69551
	334.462	0.11081		0.953368	3.95033		0.759336	9.31456
	334.962	0.115577		0.989056	3.71643		0.725541	8.96412
	335.462	0.117013		1.08076	3.1493		0.776362	8.85729
	335.962	0.111358		1.1484	3.44412		0.734778	8.70192
	336.462	0.099497		1.20075	3.67688		0.72229	8.5579
	336.962	0.0831362		1.24429	3.84827		0.732951	8.43276
	337.462	0.0630444		1.2855	3.95898		0.760813	8.33404
	337.962	0.0403011		1.33088	4.00967		0.79993	8.26926
	338.462	0.0159443		1.3869	4.00103		0.844353	8.24595
	338.962	-0.00940141		1.46006	3.93374		0.888137	8.27165
	339.462	-0.0329507		1.55685	3.80848		0.925333	8.35388
	339.962	-0.0542856		1.68374	3.62593		0.949994	8.50018
	340.462	-0.0727044		1.91856	3.46019		0.943471	7.78982
	340.962	-0.0890333		1.80781	3.24405		0.928272	9.58822
	341.462	-0.102527		1.716	3.0407		0.934329	11.079
	341.962	-0.112878		1.63848	2.86294		0.957258	12.2445
	342.462	-0.117648		1.5706	2.72356		0.992674	13.0668
	342.962	-0.116788		1.50774	2.63536		1.03619	13.5282
	343.462	-0.110335		1.44524	2.61115		1.08343	13.6109
	343.962	-0.0995484		1.37848	2.66371		1.13	13.2971
	344.462	-0.083349		1.30281	2.80586		1.17152	12.569
	344.962	-0.0626642		1.21358	3.05039		1.20361	11.4089
	345.462	-0.0389952		1.18588	3.17236		1.25613	10.8553
	345.962	-0.0145837		1.05692	3.59619		1.23468	10.0401
	346.462	0.00984295		1.0069	4.01917		1.23121	9.2044
	346.962	0.0324957		1.01514	4.42425		1.24096	8.37192
	347.462	0.0540876		1.06095	4.79441		1.25915	7.56637
	347.962	0.0734886		1.12365	5.11263		1.28103	6.81144
	348.462	0.0897173		1.18255	5.36188		1.30182	6.13085
	348.962	0.102872		1.21696	5.52513		1.31675	5.54829
	349.462	0.111724		1.2062	5.58535		1.32106	5.08749
	349.962	0.115988		1.12959	5.52552		1.30997	4.77213
	350.462	0.11705		1.19626	5.44873		1.19746	4.74576
	350.962	0.111168		1.25654	5.27419		1.18924	4.48481
	351.462	0.09923		1.31829	5.02063		1.17935	4.34605
	351.962	0.0830564		1.37574	4.72749		1.1655	4.28472
	352.462	0.0629895		1.42315	4.43418		1.14539	4.25604
	352.962	0.0401683		1.45478	4.18015		1.11673	4.21523
	353.462	0.0156511		1.46486	4.00482		1.0772	4.11754
	353.962	-0.0100435		1.44766	3.94761		1.02451	3.91818
	354.462	-0.033705		1.39741	4.04796		0.956363	3.57237
	354.962	-0.0548429		1.30838	4.3453		0.870455	3.03536
	355.462	-0.073176		1.36424	4.31033		0.879552	4.17269
	355.962	-0.0891328		1.33078	4.26174		0.901656	4.88519
	356.462	-0.102213		1.28298	4.2312		0.92489	5.31625
	356.962	-0.112447		1.22669	4.21617		0.948449	5.50773
	357.462	-0.11716		1.16778	4.2141		0.971528	5.50146
	357.962	-0.116389		1.11211	4.22242		0.993324	5.3393
	358.462	-0.110242		1.06555	4.23859		1.01303	5.06309
	358.962	-0.0996986		1.03396	4.26006		1.02985	4.71468
	359.462	-0.0837027		1.0232	4.28427		1.04296	4.33591
	359.962	-0.0630762		1.03915	4.30867		1.05158	3.96864
	360.462	-0.0392133		1.21106	4.53839		1.17959	3.89416
	360.962	-0.0147158		1.06998	4.24602		1.13314	3.92001
	361.462	0.00961092		0.959687	4.02848		1.10097	3.95831
	361.962	0.0322253		0.879441	3.87072		1.09421	4.00909
	362.462	0.053758		0.8285	3.75773		1.124	4.0724
	362.962	0.0730995		0.806123	3.67447		1.20147	4.14828
	363.462	0.089278		0.811569	3.60591		1.33775	4.23677
	363.962	0.10249		0.844095	3.53703		1.54397	4.33792
	364.462	0.111506		0.90296	3.4528		1.83127	4.45176
	364.962	0.116074		0.987422	3.33819		2.21077	4.57835
	365.462	0.117138		1.03128	3.17424		2.68013	5.06896
	365.962	0.11143		1.06447	3.07993		2.96197	4.71332
	366.462	0.0996753		1.08628	2.96382		3.22094	4.40374
	366.962	0.0836654		1.0983	2.83201		3.46152	4.13755
	367.462	0.0636591		1.10216	2.6906		3.68818	3.91208
	367.962	0.0407917		1.09945	2.54569		3.90539	3.72463
	368.462	0.0161647		1.09178	2.4034		4.11761	3.57255
	368.962	-0.0094739		1.08075	2.26983		4.32931	3.45315
	369.462	-0.0332324		1.06797	2.15107		4.54496	3.36375
	369.962	-0.0543695		1.05504	2.05324		4.76903	3.30169
	370.462	-0.0727538		0.945444	1.95068		5.13114	3.38548
	370.962	-0.0887767		0.907268	1.92267		5.13689	3.0453
	371.462	-0.101877		0.841344	1.87717		5.21952	2.79257
	371.962	-0.111907		0.757891	1.81646		5.36195	2.62
	372.462	-0.116641		0.667125	1.7428		5.54714	2.52028
	372.962	-0.116063		0.579266	1.65845		5.758	2.48612
	373.462	-0.110287		0.504532	1.56568		5.97749	2.51021
	373.962	-0.100043		0.453141	1.46675		6.18852	2.58527
	374.462	-0.0841692		0.435312	1.36393		6.37404	2.70398
	374.962	-0.0634939		0.461261	1.25948		6.51698	2.85905
	375.462	-0.0393603		0.466854	1.27603		6.49877	2.97614
	375.962	-0.0147126		0.454685	1.23485		7.06914	4.03009
	376.462	0.00951548		0.487369	1.28828		7.43587	4.79957
	376.962	0.0319504		0.555707	1.41744		7.6297	5.32254
	377.462	0.0532884		0.650501	1.60346		7.68134	5.63693
	377.962	0.0724119		0.762553	1.82746		7.62154	5.78072
	378.462	0.0883473		0.882666	2.07058		7.48103	5.79184
	378.962	0.101066		1.00164	2.31392		7.29053	5.70825
	379.462	0.110076		1.11028	2.53864		7.08078	5.5679
	379.962	0.1151		1.19938	2.72584		6.88252	5.40874
	380.462	0.116992		0.867956	3.2582		6.56229	4.22636
	380.962	0.111767		1.17858	3.06551		6.89961	4.91199
	381.462	0.10019		1.38428	2.98968		7.04647	5.65392
	381.962	0.0838436		1.49987	3.0051		7.0298	6.37464
	382.462	0.0637146		1.54015	3.08617		6.87648	6.99666
	382.962	0.0408797		1.51991	3.20725		6.61344	7.44246
	383.462	0.016382		1.45396	3.34276		6.26757	7.63455
	383.962	-0.00931457		1.35709	3.46706		5.86578	7.49542
	384.462	-0.0328669		1.24409	3.55456		5.43498	6.94757
	384.962	-0.0537577		1.12978	3.57963		5.00207	5.9135
	385.462	-0.0717749		0.950501	3.22177		4.91239	3.23322
	385.962	-0.0877441		0.987568	3.51593		4.7529	3.31414
	386.462	-0.101062		0.992844	3.80427		4.71074	3.56182
	386.962	-0.111732		0.973363	4.08372		4.76367	3.94441
	387.462	-0.116904		0.936161	4.35121		4.88941	4.43004
	387.962	-0.11658		0.888273	4.60367		5.0657	4.98684
	388.462	-0.110836		0.836734	4.83802		5.27028	5.58293
	388.962	-0.10037		0.78858	5.0512		5.48088	6.18646
	389.462	-0.0843565		0.750845	5.24013		5.67525	6.76554
	389.962	-0.0635939		0.730565	5.40174		5.83111	7.28832
	390.462	-0.0389779		0.716252	5.84334		6.07076	8.55346
	390.962	-0.0141814		0.797167	5.72634		5.95003	8.22684
	391.462	0.01013		0.914939	5.76108		5.8432	8.14399
	391.962	0.0327836		1.06019	5.89946		5.74341	8.21412
	392.462	0.0542418		1.22355	6.09335		5.64383	8.34647
	392.962	0.0734542		1.39563	6.29465		5.53759	8.45028
	393.462	0.0894674		1.56707	6.45524		5.41785	8.43479
	393.962	0.102052		1.72847	6.52702		5.27776	8.20922
	394.462	0.110925		1.87048	6.46186		5.11046	7.68281
	394.962	0.115672		1.9837	6.21165		4.90911	6.7648
	395.462	0.117021		2.03604	5.99435		4.38418	7.06671
	395.962	0.111347		2.01443	5.31277		3.90976	5.59872
	396.462	0.0994094		1.93698	4.86427		3.50299	4.61532
	396.962	0.0826044		1.82274	4.60257		3.15955	4.03096
	397.462	0.0621908		1.69076	4.48139		2.87512	3.76009
	397.962	0.0392086		1.56009	4.45443		2.64536	3.71715
	398.462	0.0146719		1.44978	4.47543		2.46597	3.81661
[truncated: 1,606 more rows]

## Sheet: Fig 5C,S1B
animal #1 (shown in C)								animal #2								animal #3								animal #4								animal #5
Time (s)	Locomotion state (Forward = 1, Reverse = -1)	Calcium activity of AIY (dR/R0)	AVA	RME	SMDD	SMDV		Time (s)	Locomotion state (Forward = 1, Reverse = -1)	Calcium activity of AIY (dR/R0)	AVA	RME	SMDD	SMDV		Time (s)	Locomotion state (Forward = 1, Reverse = -1)	Calcium activity of AIY (dR/R0)	AVA	RME	SMDD	SMDV		Time (s)	Locomotion state (Forward = 1, Reverse = -1)	Calcium activity of AIY (dR/R0)	AVA	RME	SMDD	SMDV		Time (s)	Locomotion state (Forward = 1, Reverse = -1)	Calcium activity of AIY (dR/R0)	AVA	RME	SMDD	SMDV
1.0242	-1	1.44503	0.653496	1.33741	3.53424	0.830599		1.0471	-1	0.379143	1.91379	1.38946	3.687	0.756286		1.1851	1	0.941715	1.02665	2.02866	1.01392	0.262753		1.0388	-1	1.76131	0.643307	NaN	0.322763	3.99269		0.9726	1	0.0073029	0.62921	0.347663	0.535782	2.87771
1.5242	-1	1.37252	0.611441	1.35485	3.53453	0.792086		1.5471	0	0.41736	1.79886	1.35444	3.47768	0.682473		1.6851	1	1.08442	1.02732	1.99649	1.01942	0.245509		1.5388	-1	1.84667	0.517897	NaN	0.32024	3.8863		1.4726	1	-0.0175388	0.588203	0.33034	0.544786	2.89675
2.0242	-1	1.2805	0.585362	1.37963	3.49421	0.763563		2.0471	0	0.480226	1.64843	1.33108	3.2704	0.582989		2.1851	1	1.1923	1.03701	1.97211	0.99966	0.229498		2.0388	-1	1.94995	0.425048	NaN	0.334913	3.78153		1.9726	1	-0.0313797	0.554892	0.318757	0.545403	2.91993
2.5242	-1	1.18591	0.561097	1.40612	3.43736	0.72535		2.5471	1	0.553143	1.50263	1.33089	3.08264	0.484067		2.6851	1	1.26946	1.04329	1.95072	0.978416	0.220947		2.5388	-1	2.03577	0.362816	NaN	0.348082	3.67021		2.4726	1	-0.0396959	0.544604	0.310835	0.536734	3.03844
3.0242	-1	1.08672	0.540083	1.43568	3.35092	0.669777		3.0471	1	0.638032	1.36234	1.3583	2.91815	0.385816		3.1851	1	1.29102	1.04341	1.93472	0.954486	0.22589		3.0388	-1	2.09259	0.351395	NaN	0.358755	3.54804		2.9726	1	-0.0451408	0.546283	0.304817	0.52324	3.20648
3.5242	-1	0.998415	0.520751	1.45379	3.26037	0.605032		3.5471	1	0.652835	1.32506	1.57594	2.88297	0.333885		3.6851	1	1.31843	1.04649	1.92757	0.939001	0.237091		3.5388	-1	2.07354	0.405016	NaN	0.384109	3.46111		3.4726	1	-0.0362719	0.54511	0.391603	0.53227	3.34688
4.0242	-1	0.917424	0.502551	1.46419	3.16708	0.53412		4.0471	1	0.637053	1.33273	1.8766	2.90421	0.302167		4.1851	1	1.34979	1.05158	1.9264	0.929226	0.252522		4.0388	-1	2.00358	0.502288	NaN	0.419316	3.39783		3.9726	1	-0.0257667	0.545012	0.498372	0.566542	3.50828
4.5242	-1	0.911536	0.468379	1.46254	3.11482	0.517702		4.5471	1	0.573134	1.55958	2.13703	3.05081	0.35766		4.6851	1	1.34686	1.05365	1.91387	0.931866	0.267165		4.5388	-1	1.86714	0.580083	NaN	0.427149	3.30222		4.4726	1	-0.0129445	0.548878	0.649815	0.676158	3.7416
5.0242	-1	0.925109	0.430069	1.45777	3.07319	0.515405		5.0471	1	0.494645	1.81879	2.3782	3.20895	0.42321		5.1851	1	1.33973	1.05629	1.91212	0.933594	0.271965		5.0388	-1	1.71389	0.652953	NaN	0.428063	3.19843		4.9726	1	-0.00643134	0.557812	0.825493	0.768169	3.86341
5.5242	-1	0.928056	0.442249	1.3791	3.03651	0.558275		5.5471	1	0.347907	2.13425	2.50923	3.34702	0.490048		5.6851	1	1.30664	1.06263	1.9795	0.929195	0.213822		5.5388	-1	1.54522	0.762918	NaN	0.446868	3.32675		5.4726	1	-0.00672578	0.572214	1.02732	0.841183	3.8649
6.0242	-1	0.92173	0.451592	1.2955	2.98017	0.631739		6.0471	0	0.213732	2.38529	2.5983	3.47183	0.558777		6.1851	1	1.25478	1.06672	1.99455	0.922375	0.155599		6.0388	-1	1.37173	0.869335	NaN	0.471011	3.48171		5.9726	0	-0.00793509	0.601732	1.19008	0.890477	3.78252
6.5242	-1	0.8713	0.421324	1.22156	2.81696	0.845805		6.5471	0	0.138625	2.33346	2.49017	3.5343	0.636399		6.6851	1	1.17106	1.06699	1.92083	0.911445	0.0972415		6.5388	-1	1.17497	0.91642	NaN	0.520358	3.63827		6.4726	0	-0.00975179	0.641285	1.32691	0.924024	3.64447
7.0242	-1	0.809564	0.396203	1.14834	2.60478	1.00825		7.0471	-1	0.0666939	2.27163	2.37269	3.58382	0.707732		7.1851	1	1.08498	1.06396	1.86341	0.909665	0.039114		7.0388	-1	0.997498	0.982472	NaN	0.580364	3.77386		6.9726	-1	-0.00328101	0.702322	1.42236	0.901129	3.40983
7.5242	-1	0.729225	0.379552	1.0763	2.31203	1.08577		7.5471	-1	0.0402956	2.06655	2.12121	3.44767	0.688894		7.6851	1	0.99725	1.05863	1.81731	0.914237	-0.0188538		7.5388	-1	0.861362	1.08916	NaN	0.663209	3.8645		7.4726	-1	0.00745763	0.765429	1.50494	0.86683	3.1619
8.0242	-1	0.694342	0.337011	1.04934	2.07242	1.175		8.0471	-1	0.0510139	1.85174	1.88697	3.31131	0.665647		8.1851	1	0.924262	1.05129	1.73333	0.908772	-0.0357133		8.0388	-1	0.737435	1.18116	NaN	0.738986	3.78773		7.9726	-1	0.0563072	0.787928	1.52801	0.846775	3.0349
8.5242	-1	0.687699	0.278386	1.05038	1.86583	1.27152		8.5471	-1	0.168926	1.60885	1.70252	3.1743	0.629666		8.6851	1	0.857306	1.04312	1.63384	0.899199	-0.0357494		8.5388	-1	0.623959	1.26056	NaN	0.808711	3.56765		8.4726	-1	0.114794	0.805926	1.55339	0.859129	2.94175
9.0242	-1	0.727918	0.257266	1.03362	1.83659	1.33204		9.0471	-1	0.292958	1.52252	1.52107	3.01983	0.590297		9.1851	1	0.816636	1.0623	1.64481	0.89084	-0.0462367		9.0388	-1	0.561118	1.38216	NaN	0.83927	3.35329		8.9726	-1	0.195661	0.813472	1.5841	0.946747	2.92721
9.5242	-1	0.777195	0.243397	1.01342	1.84163	1.38561		9.5471	-1	0.423664	1.6069	1.3429	2.84632	0.547233		9.6851	1	0.779949	1.08254	1.65837	0.880268	-0.0454205		9.5388	-1	0.524665	1.52573	NaN	0.849418	3.1419		9.4726	-1	0.287006	0.814534	1.6257	1.03115	2.90438
10.0242	-1	0.833632	0.226203	1.03156	1.92476	1.53805		10.0471	-1	0.552457	1.68078	1.51313	2.76274	0.53594		10.1851	0	0.7544	1.10109	1.65767	0.859866	0.00655636		10.0388	-1	0.545815	1.66164	NaN	0.855605	3.01316		9.9726	-1	0.393978	0.805927	1.68354	1.11076	2.86919
10.5242	-1	0.892333	0.213792	1.05486	2.00545	1.6842		10.5471	-1	0.680424	1.75012	1.83396	2.71803	0.538381		10.6851	-1	0.72209	1.11954	1.64556	0.84382	0.0584755		10.5388	-1	0.58602	1.79251	NaN	0.860176	2.89979		10.4726	-1	0.493792	0.814414	1.75145	1.19983	2.8078
11.0242	-1	0.965991	0.248383	1.09386	1.99849	1.68952		11.0471	-1	0.774943	1.79314	2.14815	2.69461	0.552704		11.1851	-1	0.680796	1.13787	1.61826	0.833561	0.110318		11.0388	-1	0.74023	1.88545	NaN	0.854124	2.84079		10.9726	-1	0.589238	0.833333	1.82551	1.29468	2.73043
11.5242	-1	1.04838	0.282638	1.1381	1.96664	1.66517		11.5471	-1	0.872758	1.83387	2.4709	2.67712	0.567446		11.6851	-1	0.661097	1.14617	1.61012	0.825202	0.163706		11.5388	-1	0.9105	1.96248	NaN	0.847573	2.76974		11.4726	-1	0.648068	0.847989	1.87062	1.31957	2.66419
12.0242	-1	1.16215	0.315688	1.20116	1.84542	1.53425		12.0471	-1	1.04019	1.88136	2.88557	2.69463	0.573161		12.1851	-1	0.65319	1.14901	1.61243	0.81788	0.217938		12.0388	-1	1.11525	2.00537	NaN	0.83995	2.67283		11.9726	-1	0.699934	0.861834	1.91022	1.33115	2.60007
12.5242	-1	1.30084	0.360509	1.25436	1.72804	1.38441		12.5471	-1	1.20996	1.92431	3.20952	2.70009	0.575096		12.6851	-1	0.641844	1.14494	1.61064	0.811746	0.247246		12.5388	-1	1.32253	2.03684	NaN	0.831831	2.58889		12.4726	-1	0.735681	0.883097	1.93676	1.25099	2.5506
13.0242	-1	1.47162	0.420494	1.29486	1.6156	1.21019		13.0471	-1	1.38811	1.95093	3.20656	2.66216	0.563414		13.1851	-1	0.630063	1.14	1.60832	0.805761	0.273398		13.0388	-1	1.53198	2.05856	NaN	0.823288	2.51602		12.9726	-1	0.771819	0.902492	1.9594	1.16013	2.49517
13.5242	-1	1.61303	0.445244	1.34467	1.50145	1.09043		13.5471	-1	1.46555	1.9858	3.17358	2.63871	0.551272		13.6851	-1	0.65269	1.14071	1.60482	0.803166	0.299103		13.5388	-1	1.6733	2.07151	NaN	0.817791	2.41212		13.4726	-1	0.823951	0.902173	1.96404	1.06582	2.38426
14.0242	-1	1.7404	0.453168	1.39893	1.38647	0.996678		14.0471	-1	1.41418	2.0312	3.10222	2.63377	0.538542		14.1851	-1	0.683227	1.14263	1.6011	0.801472	0.324986		14.0388	-1	1.77296	2.0983	NaN	0.821064	2.29966		13.9726	-1	0.866242	0.904946	1.97043	0.974768	2.28574
14.5242	-1	1.86043	0.463593	1.43379	1.32222	0.921226		14.5471	-1	1.2656	2.06751	2.89662	2.61103	0.527298		14.6851	-1	0.689719	1.13745	1.60007	0.801775	0.361211		14.5388	-1	1.78057	2.20146	NaN	0.860176	2.19313		14.4726	-1	0.877543	0.917453	1.98232	0.893993	2.22625
15.0242	-1	1.97362	0.476345	1.45063	1.30515	0.862786		15.0471	-1	1.06648	2.09911	2.62125	2.57906	0.516826		15.1851	-1	0.695543	1.13457	1.60128	0.80252	0.388257		15.0388	-1	1.76141	2.3036	NaN	0.899335	2.06888		14.9726	-1	0.918155	0.929011	1.99173	0.832868	2.16782
15.5242	-1	1.93094	0.473614	1.47045	1.22786	0.798482		15.5471	-1	0.837733	2.12816	2.39607	2.56711	0.524829		15.6851	-1	0.699336	1.13873	1.60927	0.804609	0.387407		15.5388	-1	1.70182	2.40418	NaN	0.938563	1.91789		15.4726	-1	1.03399	0.93813	1.99479	0.822173	2.11213
16.0242	-1	1.83297	0.465392	1.49133	1.12921	0.732098		16.0471	-1	0.618082	2.15482	2.18208	2.55243	0.534584		16.1851	-1	0.686917	1.13406	1.6144	0.785403	0.388136		16.0388	-1	1.64526	2.51899	NaN	0.970879	1.82555		15.9726	-1	1.14094	0.96121	1.98943	0.836763	2.05925
16.5242	-1	1.7919	0.493676	1.46125	1.24201	0.81016		16.5471	-1	0.564718	2.15814	2.00181	2.46576	0.52868		16.6851	-1	0.653563	1.11799	1.61582	0.738696	0.390906		16.5388	-1	1.58193	2.6184	NaN	1.00293	1.76339		16.4726	-1	1.23902	0.998207	1.97567	0.876555	2.00916
17.0242	-1	1.73542	0.520236	1.43837	1.36613	0.905979		17.0471	-1	0.505024	2.15997	1.83247	2.38764	0.524686		17.1851	-1	0.634635	1.10541	1.60916	0.69005	0.38674		17.0388	-1	1.49179	2.65001	NaN	1.04027	1.75613		16.9726	-1	1.36976	1.03249	1.95181	0.92561	1.91767
17.5242	-1	1.57653	0.52461	1.472	1.47532	1.04502		17.5471	-1	0.430445	2.15832	1.68885	2.32965	0.525183		17.6851	-1	0.6233	1.09468	1.59824	0.640383	0.378926		17.5388	-1	1.40873	2.68318	NaN	1.05865	1.7693		17.4726	-1	1.51319	1.06572	1.92403	0.978266	1.81008
18.0242	0	1.44277	0.534896	1.50025	1.60211	1.21389		18.0471	-1	0.359806	2.16546	1.55692	2.26708	0.517748		18.1851	-1	0.62549	1.08296	1.58808	0.591236	0.374684		18.0388	-1	1.33473	2.71832	NaN	1.05282	1.80852		17.9726	-1	1.51655	1.08264	1.8664	1.02946	1.715
18.5242	0	1.37449	0.560581	1.51447	1.77479	1.46044		18.5471	-1	0.29282	2.18076	1.43585	2.20026	0.502963		18.6851	-1	0.632354	1.07255	1.57993	0.547765	0.370126		18.5388	-1	1.30512	2.78628	NaN	1.06803	1.79513		18.4726	-1	1.50534	1.09629	1.80944	1.07509	1.62955
19.0242	1	1.27831	0.548884	1.52011	1.83433	1.68415		19.0471	-1	0.23779	2.18677	1.34403	2.15748	0.491108		19.1851	-1	0.660628	1.0734	1.58652	0.547662	0.359208		19.0388	-1	1.28974	2.8529	NaN	1.07858	1.77018		18.9726	-1	1.45902	1.09619	1.76801	1.08734	1.598
19.5242	1	1.15405	0.499535	1.51711	1.77994	1.88485		19.5471	-1	0.186987	2.18951	1.26255	2.1232	0.480289		19.6851	-1	0.677422	1.07501	1.58676	0.548479	0.349662		19.5388	-1	1.35654	2.83945	NaN	0.992714	1.71097		19.4726	-1	1.41192	1.09494	1.72758	1.09412	1.57461
20.0242	1	1.0982	0.458416	1.46539	1.73925	2.05901		20.0471	-1	0.162224	2.20691	1.19738	2.06873	0.471675		20.1851	-1	0.669295	1.07824	1.57323	0.55129	0.343091		20.0388	-1	1.41575	2.81262	NaN	0.93628	1.67699		19.9726	-1	1.3612	1.0884	1.69182	1.07556	1.58902
20.5242	1	1.06934	0.420541	1.39446	1.70395	2.22269		20.5471	-1	0.146763	2.22956	1.13805	2.00704	0.463849		20.6851	-1	0.652481	1.07849	1.56606	0.554997	0.338046		20.5388	-1	1.46734	2.77236	NaN	0.909398	1.66835		20.4726	-1	1.32144	1.08469	1.66315	1.06105	1.58877
21.0242	1	1.0814	0.400314	1.36917	1.63401	2.32339		21.0471	-1	0.140145	2.23759	1.11783	1.95102	0.467877		21.1851	-1	0.62807	1.07613	1.56443	0.559487	0.334336		21.0388	-1	1.54341	2.68926	NaN	0.869367	1.69019		20.9726	-1	1.2997	1.08564	1.6461	1.05318	1.56445
21.5242	1	1.09906	0.386554	1.34902	1.56162	2.40419		21.5471	-1	0.140092	2.24608	1.09776	1.89188	0.474802		21.6851	-1	0.601089	1.0747	1.56873	0.561996	0.334012		21.5388	-1	1.6201	2.60386	NaN	0.832374	1.71768		21.4726	-1	1.28513	1.08188	1.63166	1.03636	1.55731
22.0242	1	1.12724	0.398987	1.33458	1.49259	2.40851		22.0471	-1	0.168284	2.25976	1.07005	1.81721	0.492518		22.1851	-1	0.572764	1.07375	1.57613	0.563467	0.335461		22.0388	-1	1.65571	2.58124	NaN	0.842341	1.72999		21.9726	-1	1.27772	1.0734	1.61984	1.0106	1.56735
22.5242	1	1.1762	0.410822	1.32984	1.40531	2.39142		22.5471	-1	0.194991	2.25414	1.04233	1.73523	0.505157		22.6851	-1	0.537581	1.07164	1.58816	0.557623	0.342781		22.5388	-1	1.69197	2.56201	NaN	0.854046	1.72608		22.4726	-1	1.25446	1.06489	1.60127	0.991834	1.58397
23.0242	1	1.25656	0.421754	1.33976	1.29044	2.34199		23.0471	-1	0.219451	2.21931	1.01459	1.64218	0.510111		23.1851	-1	0.501222	1.06887	1.60016	0.551357	0.350385		23.0388	-1	1.7317	2.56064	NaN	0.874928	1.63643		22.9726	-1	1.22464	1.05638	1.57992	0.97596	1.60332
23.5242	1	1.28833	0.407616	1.32427	1.21532	2.27131		23.5471	-1	0.239629	2.19429	0.969411	1.55262	0.50488		23.6851	-1	0.462995	1.06133	1.60554	0.550964	0.352763		23.5388	-1	1.7565	2.53002	NaN	0.924423	1.5359		23.4726	-1	1.20662	1.05541	1.55222	0.973952	1.63804
24.0242	1	1.29012	0.37801	1.2931	1.16472	2.18752		24.0471	-1	0.256335	2.17564	0.913096	1.46595	0.492812		24.1851	0	0.422803	1.05387	1.61064	0.551272	0.354817		24.0388	-1	1.7588	2.45534	NaN	1.01702	1.419		23.9726	-1	1.20593	1.05363	1.53288	0.974051	1.66307
24.5242	1	1.23906	0.3504	1.28653	1.22805	2.1214		24.5471	-1	0.240936	2.14621	0.886743	1.40943	0.479981		24.6851	0	0.378724	1.04656	1.61518	0.552969	0.35623		24.5388	-1	1.79727	2.3857	NaN	1.15377	1.30161		24.4726	-1	1.28689	1.04547	1.55671	0.980178	1.63552
25.0242	1	1.17299	0.322341	1.28365	1.31316	2.05607		25.0471	-1	0.226979	2.12092	0.866682	1.35917	0.471621		25.1851	1	0.338904	1.03982	1.62429	0.56139	0.354576		25.0388	-1	1.85806	2.31916	NaN	1.31777	1.18392		24.9726	-1	1.38942	1.03211	1.59199	0.984057	1.60365
25.5242	1	1.03126	0.281941	1.2666	1.40332	1.95283		25.5471	-1	0.21765	2.10893	0.866808	1.32898	0.477609		25.6851	1	0.304153	1.03375	1.63883	0.577815	0.349273		25.5388	-1	1.79223	2.31618	NaN	1.43232	1.07687		25.4726	-1	1.52822	1.01001	1.64651	0.984157	1.56453
26.0242	1	0.914419	0.241923	1.25327	1.49039	1.87179		26.0471	-1	0.212614	2.09876	0.906806	1.29647	0.475145		26.1851	1	0.287633	1.03122	1.65709	0.591073	0.346335		26.0388	-1	1.69846	2.32723	NaN	1.53596	0.972164		25.9726	-1	1.63176	0.983994	1.72261	1.01432	1.51955
26.5242	1	0.896196	0.203417	1.25468	1.56521	1.87866		26.5471	-1	0.210014	2.0896	0.969406	1.26265	0.46789		26.6851	1	0.288227	1.03199	1.67885	0.601359	0.345617		26.5388	-1	1.51858	2.3024	NaN	1.59285	0.940476		26.4726	-1	1.71861	0.956225	1.80842	1.05879	1.4719
27.0242	0	0.873633	0.166992	1.25837	1.6105	1.87513		27.0471	-1	0.214467	2.10693	1.05321	1.24287	0.455758		27.1851	1	0.308926	1.02791	1.68305	0.616512	0.343088		27.0388	-1	1.32541	2.28358	NaN	1.62315	0.911132		26.9726	-1	1.78502	0.94091	1.83644	1.13084	1.43483
27.5242	0	0.845137	0.133415	1.26517	1.61539	1.85738		27.5471	-1	0.220081	2.12861	1.1405	1.22541	0.442825		27.6851	1	0.336828	1.02209	1.68095	0.633409	0.339911		27.5388	-1	1.09706	2.30344	NaN	1.5449	0.870401		27.4726	-1	1.83314	0.924921	1.86378	1.19888	1.39624
28.0242	-1	0.825684	0.122004	1.28679	1.62582	1.8367		28.0471	0	0.243271	2.17353	1.25142	1.2159	0.404286		28.1851	1	0.383976	1.02058	1.66561	0.639102	0.339482		28.0388	-1	0.915791	2.28954	NaN	1.4546	0.854761		27.9726	-1	1.73074	0.903387	1.88554	1.23395	1.34527
28.5242	-1	0.811273	0.122953	1.31666	1.63935	1.81438		28.5471	1	0.270433	2.2143	1.35357	1.20438	0.371758		28.6851	1	0.430064	1.02394	1.6496	0.644496	0.338869		28.5388	-1	0.805573	2.22471	NaN	1.34613	0.87698		28.4726	-1	1.64331	0.895117	1.88431	1.20783	1.30037
29.0242	-1	0.792966	0.122079	1.32034	1.7444	1.69264		29.0471	1	0.31199	2.23628	1.4184	1.18405	0.365686		29.1851	1	0.465744	1.05259	1.6332	0.650995	0.336583		29.0388	-1	0.782109	2.22386	NaN	1.24545	0.837349		28.9726	-1	1.5689	0.898385	1.86306	1.12848	1.26075
29.5242	0	0.777999	0.120506	1.31894	1.87031	1.55391		29.5471	1	0.354153	2.24803	1.49963	1.16033	0.360563		29.6851	1	0.497126	1.07565	1.62799	0.648152	0.327505		29.5388	-1	0.768189	2.22566	NaN	1.17077	0.797107		29.4726	-1	1.44714	0.90574	1.8486	1.05938	1.23951
30.0242	0	0.796869	0.114945	1.30383	2.07185	1.38252		30.0471	1	0.397616	2.23785	1.61611	1.12932	0.35748		30.1851	1	0.521968	1.09022	1.6398	0.631095	0.308091		30.0388	-1	0.747913	2.21137	NaN	1.16086	0.777493		29.9726	-1	1.31099	0.914338	1.8362	0.9934	1.22385
30.5242	1	0.816014	0.126165	1.28485	2.29127	1.24502		30.5471	1	0.45182	2.21574	1.73375	1.09775	0.346292		30.6851	1	0.544807	1.09945	1.65359	0.692522	0.302552		30.5388	-1	0.737781	2.15772	NaN	1.17057	0.749887		30.4726	-1	1.33322	0.93334	1.80636	0.956491	1.1956
31.0242	1	0.835786	0.175658	1.25706	2.55147	1.1848		31.0471	1	0.515996	2.18256	1.85246	1.06566	0.327581		31.1851	1	0.566401	1.10537	1.66862	0.802708	0.305633		31.0388	-1	0.728749	2.09907	NaN	1.18049	0.724087		30.9726	-1	1.37836	0.953374	1.77414	0.925345	1.16579
31.5242	1	0.815856	0.245413	1.23521	2.75402	1.11478		31.5471	1	0.552826	2.14778	1.9722	1.04995	0.309169		31.6851	1	0.59015	1.12553	1.77595	0.995287	0.291303		31.5388	-1	0.690001	2.14913	NaN	1.11555	0.745918		31.4726	-1	1.4475	0.944656	1.74837	0.998054	1.15026
32.0242	1	0.741902	0.342737	1.22145	2.87813	1.03142		32.0471	1	0.579987	2.11244	2.09232	1.04002	0.290863		32.1851	1	0.614859	1.15058	1.89791	1.20507	0.27458		32.0388	-1	0.743432	2.24793	NaN	1.04558	0.752217		31.9726	-1	1.52443	0.936801	1.71849	1.06484	1.13901
32.5242	1	0.679481	0.414259	1.20831	2.9593	0.981849		32.5471	1	0.572705	2.08929	2.1388	1.02295	0.275098		32.6851	1	0.648577	1.21091	1.9631	1.43346	0.274712		32.5388	-1	0.935594	2.4201	NaN	0.968037	0.735141		32.4726	-1	1.62719	0.931803	1.67495	1.112	1.14193
33.0242	1	0.62399	0.470274	1.19554	3.01465	0.952575		33.0471	1	0.55434	2.07031	2.17416	1.00687	0.265459		33.1851	1	0.669998	1.27998	2.0053	1.63682	0.273489		33.0388	-1	1.06679	2.5973	NaN	0.921252	0.679943		32.9726	-1	1.76393	0.926677	1.63073	1.13568	1.16477
33.5242	1	0.705271	0.487539	1.18927	2.99109	0.94435		33.5471	1	0.49172	2.06816	2.17286	0.996769	0.283568		33.6851	1	0.659131	1.37199	1.98714	1.77444	0.268708		33.5388	-1	1.16333	2.77737	NaN	0.89195	0.603075		33.4726	-1	1.961	0.921325	1.5853	1.11768	1.22298
34.0242	1	0.811642	0.497696	1.18418	2.95304	0.939985		34.0471	1	0.432161	2.07462	2.16404	0.989112	0.297131		34.1851	1	0.65915	1.44823	1.84801	1.86893	0.296221		34.0388	-1	1.25993	2.92302	NaN	0.94304	0.478245		33.9726	-1	2.17831	0.916075	1.54016	1.06351	1.29442
34.5242	1	0.98067	0.467091	1.19979	3.02601	0.955859		34.5471	1	0.377221	2.09408	2.14385	0.985146	0.303834		34.6851	1	0.66943	1.5096	1.59488	1.92277	0.354171		34.5388	-1	1.28268	2.98813	NaN	0.979556	0.375906		34.4726	-1	2.41227	0.910909	1.49525	0.979595	1.37674
35.0242	0	1.14526	0.438325	1.21737	3.10146	0.974798		35.0471	0	0.382318	2.11626	2.10726	0.994586	0.289651		35.1851	1	0.663843	1.5382	1.41381	1.89236	0.398535		35.0388	-1	1.17365	2.91349	NaN	0.980887	0.319168		34.9726	-1	2.74851	0.920341	1.44683	0.887255	1.47629
35.5242	0	1.2121	0.457971	1.25246	3.15368	1.02731		35.5471	0	0.424462	2.14012	2.06056	1.0123	0.26258		35.6851	1	0.651956	1.55378	1.26135	1.82851	0.437505		35.5388	-1	1.13495	2.74015	NaN	0.983601	0.269683		35.4726	-1	3.02898	0.938758	1.41134	0.828511	1.55868
36.0242	-1	1.2588	0.475101	1.2909	3.19674	1.0552		36.0471	-1	0.45579	2.13104	2.22516	1.04284	0.243569		36.1851	1	0.71	1.56314	1.1919	1.73995	0.456847		36.0388	-1	1.11622	2.53881	NaN	0.986707	0.222256		35.9726	-1	3.11407	0.968601	1.40807	0.853145	1.59011
36.5242	-1	1.24946	0.485231	1.33866	3.21431	1.01456		36.5471	-1	0.485027	2.1156	2.43062	1.07586	0.226116		36.6851	1	0.768149	1.56915	1.14129	1.64993	0.467027		36.5388	-1	1.08984	2.27731	NaN	0.970337	0.181085		36.4726	-1	3.15029	1.00289	1.41076	0.901024	1.60917
37.0242	-1	1.24291	0.480311	1.36097	3.21966	0.958343		37.0471	-1	0.52829	2.10677	2.64411	1.12416	0.227907		37.1851	1	0.765417	1.55498	1.1618	1.57051	0.424297		37.0388	-1	1.04579	2.07025	NaN	1.0003	0.132582		36.9726	-1	3.12429	1.04283	1.42104	0.978487	1.6125
37.5242	-1	1.23935	0.459296	1.35604	3.21194	0.885462		37.5471	-1	0.572156	2.09822	2.85794	1.17313	0.230525		37.6851	1	0.772619	1.55149	1.15855	1.51594	0.388684		37.5388	-1	0.982591	1.92401	NaN	1.08135	0.0759276		37.4726	-1	2.93494	1.07	1.43345	1.03849	1.59916
38.0242	-1	1.31209	0.438745	1.37023	3.20093	0.836052		38.0471	-1	0.555838	2.05961	3.09286	1.21004	0.261341		38.1851	1	0.799417	1.56906	1.10841	1.51038	0.367109		38.0388	-1	0.920585	1.84523	NaN	1.1032	0.0509081		37.9726	-1	2.66173	1.09061	1.44694	1.08953	1.57727
38.5242	-1	1.41688	0.418389	1.39246	3.18853	0.796501		38.5471	-1	0.540404	2.02921	3.25454	1.23933	0.292868		38.6851	1	0.782015	1.56455	1.05724	1.51807	0.32752		38.5388	-1	0.859091	1.79551	NaN	1.09958	0.0395113		38.4726	-1	2.40135	1.08555	1.42059	1.10666	1.58372
39.0242	-1	1.5655	0.387884	1.36658	3.31513	0.752519		39.0471	-1	0.527984	2.02513	3.1824	1.24433	0.326577		39.1851	1	0.732106	1.54382	1.00532	1.53549	0.274682		39.0388	-1	0.818437	1.78509	NaN	1.117	0.0141188		38.9726	-1	2.14781	1.07689	1.39001	1.1164	1.59174
39.5242	-1	1.70723	0.360358	1.3387	3.4465	0.710954		39.5471	-1	0.507148	2.01091	3.11081	1.24305	0.361156		39.6851	1	0.717852	1.52006	0.968002	1.48829	0.336547		39.5388	-1	0.781728	1.77002	NaN	1.12824	-0.0135651		39.4726	-1	1.93141	1.06254	1.35987	1.10063	1.58972
40.0242	-1	1.62162	0.415598	1.35268	3.43422	0.72975		40.0471	-1	0.476347	1.98467	3.03985	1.23433	0.396768		40.1851	1	0.713914	1.49542	0.934903	1.42239	0.431598		40.0388	-1	0.739983	1.65593	NaN	1.05914	-0.0352218		39.9726	-1	1.75265	1.0463	1.32545	1.07692	1.59857
40.5242	-1	1.52545	0.464828	1.35661	3.40744	0.741447		40.5471	-1	0.442457	1.9791	2.9911	1.22677	0.446141		40.6851	1	0.665368	1.47853	0.91309	1.43179	0.542804		40.5388	-1	0.705225	1.61795	NaN	1.03347	-0.0420615		40.4726	-1	1.64141	1.02667	1.28336	1.03896	1.62689
41.0242	-1	1.36689	0.478561	1.30111	3.29499	0.711224		41.0471	-1	0.406964	1.98424	2.95387	1.21981	0.502647		41.1851	1	0.619033	1.45943	0.900713	1.43675	0.666822		41.0388	-1	0.676932	1.65039	NaN	1.04799	-0.0351909		40.9726	-1	1.55625	1.00974	1.25872	0.999115	1.66426
41.5242	-1	1.17981	0.5004	1.26106	3.1402	0.695059		41.5471	-1	0.366662	2.00914	2.83596	1.294	0.544163		41.6851	1	0.59098	1.42317	0.96049	1.40541	0.88877		41.5388	-1	0.642474	1.70917	NaN	1.01464	-0.0286405		41.4726	-1	1.48992	0.994765	1.24667	0.957905	1.70819
42.0242	-1	0.946975	0.535242	1.24577	2.9175	0.701447		42.0471	-1	0.324994	2.03965	2.69516	1.39121	0.581425		42.1851	1	0.556594	1.38741	0.961447	1.38909	1.11378		42.0388	-1	0.617224	1.80118	NaN	0.99783	-0.0217959		41.9726	0	1.46817	0.988602	1.22923	0.947162	1.80077
42.5242	-1	0.863237	0.557905	1.22646	2.77275	0.723038		42.5471	-1	0.289757	2.07384	2.51166	1.47276	0.618977		42.6851	1	0.510528	1.35255	0.853933	1.40044	1.34442		42.5388	-1	0.606664	1.93984	NaN	1.01225	-0.0144658		42.4726	0	1.46601	0.98631	1.20942	0.949801	1.91471
43.0242	-1	0.877089	0.572598	1.20452	2.67903	0.754581		43.0471	-1	0.264989	2.10871	2.33917	1.54997	0.663655		43.1851	1	0.562943	1.37206	0.839113	1.36813	1.65279		43.0388	-1	0.60241	2.05116	NaN	1.02335	-0.0159467		42.9726	1	1.53586	0.992062	1.18401	0.971468	2.05431
43.5242	-1	0.976273	0.616422	1.23231	2.66251	0.801631		43.5471	-1	0.277575	2.14603	2.20613	1.61171	0.73377		43.6851	1	0.689046	1.43224	0.893649	1.30313	2.01932		43.5388	-1	0.602046	2.14393	NaN	1.03388	-0.0226209		43.4726	1	1.61713	0.997535	1.15501	0.994703	2.17217
44.0242	-1	1.09893	0.668235	1.27366	2.66759	0.852781		44.0471	-1	0.31165	2.15983	2.09475	1.629	0.839829		44.1851	1	0.898617	1.48069	0.844864	1.19549	2.29003		44.0388	-1	0.602087	2.15078	NaN	1.11715	-0.0179141		43.9726	1	1.73097	0.996142	1.10536	1.01675	2.12739
44.5242	-1	1.22475	0.716269	1.29008	2.74817	0.870079		44.5471	-1	0.373274	2.14348	2.01113	1.5893	0.991969		44.6851	1	1.1303	1.52603	0.768713	1.07656	2.53537		44.5388	-1	0.601415	2.14935	NaN	1.20046	-0.0187762		44.4726	1	1.82773	0.992064	1.05323	1.02606	2.0765
45.0242	-1	1.34942	0.762387	1.30325	2.83678	0.880797		45.0471	-1	0.498705	2.13262	2.12536	1.55344	1.14657		45.1851	1	1.35302	1.58826	0.860418	0.949644	2.72702		45.0388	-1	0.600083	2.14026	NaN	1.28381	-0.0247911		44.9726	1	1.87248	0.979807	0.993573	0.99659	2.007
45.5242	-1	1.466	0.794917	1.29345	2.98231	0.844851		45.5471	-1	0.65736	2.12461	2.34261	1.51958	1.30244		45.6851	1	1.54647	1.63433	0.991339	0.831947	2.89533		45.5388	-1	0.650444	2.06604	NaN	1.31394	0.0283117		45.4726	1	1.86228	0.96179	0.945687	0.969599	1.92616
46.0242	-1	1.56474	0.825471	1.2626	3.11253	0.801778		46.0471	-1	0.8351	2.10012	2.48187	1.50067	1.40612		46.1851	1	1.57983	1.58029	1.25234	0.770475	2.96122		46.0388	0	0.710009	1.99911	NaN	1.33112	0.0827573		45.9726	1	1.79119	0.937394	0.910846	0.945358	1.83277
46.5242	-1	1.62636	0.851912	1.18795	3.21088	0.743863		46.5471	-1	1.01597	2.07292	2.60834	1.48422	1.50125		46.6851	1	1.59032	1.53727	1.52853	0.723331	3.05729		46.5388	0	0.788348	1.96895	NaN	1.31786	0.129301		46.4726	1	1.66419	0.920763	0.886506	0.929546	1.86121
47.0242	-1	1.70631	0.880281	1.13256	3.29695	0.718051		47.0471	-1	1.10688	2.11722	2.79325	1.47241	1.4792		47.1851	1	1.54662	1.52035	1.8407	0.710139	3.22486		47.0388	1	0.875076	1.95533	NaN	1.29704	0.18393		46.9726	1	1.51169	0.907672	0.866955	0.917579	1.9452
47.5242	-1	1.80155	0.910258	1.09324	3.37276	0.71902		47.5471	-1	1.18094	2.16783	2.93433	1.46047	1.44193		47.6851	1	1.54227	1.49696	2.14727	0.654951	3.43391		47.5388	1	0.97166	1.96114	NaN	1.26734	0.248059		47.4726	1	1.38823	0.891592	0.85746	0.906676	2.01795
48.0242	-1	1.80995	0.911757	1.04429	3.42392	0.699881		48.0471	-1	1.19503	2.23753	2.89307	1.44754	1.35375		48.1851	1	1.57779	1.46699	2.44818	0.557191	3.68501		48.0388	1	1.02882	2.03851	NaN	1.23702	0.270791		47.9726	1	1.27272	0.874899	0.850209	0.896248	2.088
48.5242	-1	1.77428	0.898805	0.990436	3.46256	0.670538		48.5471	-1	1.21004	2.32814	2.88722	1.44155	1.26462		48.6851	1	1.59529	1.44264	2.51801	0.445479	3.81076		48.5388	1	1.06739	2.14966	NaN	1.20641	0.27399		48.4726	1	1.18836	0.859667	0.842155	0.891108	2.15466
49.0242	-1	1.68332	0.871622	0.986408	3.54558	0.656063		49.0471	-1	1.22633	2.4478	2.93056	1.4452	1.17416		49.1851	1	1.60243	1.42151	2.45501	0.325747	3.86447		49.0388	1	1.08317	2.26769	NaN	1.2157	0.270916		48.9726	1	1.11246	0.84347	0.834347	0.883812	2.21741
49.5242	-1	1.58489	0.842466	0.988838	3.63416	0.643421		49.5471	-1	1.27436	2.53063	3.00888	1.4443	1.10799		49.6851	1	1.58021	1.41248	2.387	0.219416	3.86797		49.5388	1	1.08632	2.32908	NaN	1.25195	0.26439		49.4726	1	1.06021	0.824569	0.827229	0.870473	2.26923
50.0242	-1	1.41573	0.783137	0.99012	3.67614	0.608278		50.0471	-1	1.34031	2.59265	3.10696	1.44083	1.05554		50.1851	1	1.54746	1.40727	2.30252	0.124577	3.86666		50.0388	1	1.07289	2.29622	NaN	1.32516	0.253349		49.9726	1	1.00081	0.80591	0.820135	0.847428	2.32087
50.5242	-1	1.27148	0.728849	0.996336	3.71042	0.586368		50.5471	-1	1.40203	2.63482	3.1997	1.4331	1.01225		50.6851	1	1.44747	1.42359	2.0307	0.140608	3.90842		50.5388	1	1.09051	2.2022	NaN	1.43255	0.221052		50.4726	1	0.934084	0.787499	0.813066	0.814473	2.37234
51.0242	-1	1.20405	0.690115	1.01777	3.72095	0.605282		51.0471	-1	1.46156	2.66674	3.2897	1.42316	0.973685		51.1851	1	1.36237	1.43592	1.79586	0.154175	3.93699		51.0388	1	1.11322	2.09815	NaN	1.54554	0.185273		50.9726	1	0.874736	0.767698	0.805537	0.783439	2.42674
51.5242	-1	1.16254	0.668482	1.03403	3.72509	0.617624		51.5471	-1	1.50489	2.66257	3.34206	1.4062	0.929299		51.6851	1	1.33874	1.43181	1.71364	0.157576	3.91105		51.5388	1	1.15576	1.88537	NaN	1.60868	0.155037		51.4726	1	0.821612	0.746726	0.797622	0.754025	2.48362
52.0242	-1	1.14871	0.66511	1.04475	3.72239	0.622948		52.0471	-1	1.5497	2.65313	3.37801	1.38954	0.882563		52.1851	1	1.3256	1.42187	1.64781	0.157764	3.8915		52.0388	1	1.23864	1.71012	NaN	1.63816	0.122864		51.9726	1	0.770034	0.731453	0.782949	0.631019	2.53198
52.5242	-1	1.12764	0.667133	1.04065	3.73757	0.626148		52.5471	-1	1.62885	2.64088	3.31041	1.38467	0.821555		52.6851	1	1.32842	1.40306	1.60693	0.153059	3.88168		52.5388	1	1.38733	1.60049	NaN	1.6139	0.0873056		52.4726	1	0.719339	0.717843	0.76647	0.482539	2.57745
53.0242	-1	1.10293	0.671871	1.02909	3.76173	0.628278		53.0471	-1	1.67737	2.63591	3.21741	1.36057	0.76348		53.1851	0	1.37367	1.37347	1.71125	0.13995	3.74659		53.0388	1	1.57806	1.55377	NaN	1.60473	0.0841197		52.9726	1	0.688241	0.708205	0.752344	0.347412	2.59982
53.5242	-1	1.11862	0.68305	1.04858	3.77678	0.630162		53.5471	-1	1.66028	2.6465	3.07	1.29531	0.711685		53.6851	0	1.4446	1.33736	1.90344	0.121754	3.5357		53.5388	1	1.74988	1.51645	NaN	1.59373	0.0853695		53.4726	1	0.656139	0.700691	0.740896	0.210188	2.6191
54.0242	-1	1.13986	0.694951	1.07214	3.79045	0.632101		54.0471	-1	1.59113	2.64491	3.02276	1.23366	0.663959		54.1851	-1	1.47015	1.31681	1.95407	0.155669	3.52918		54.0388	1	1.85805	1.48113	NaN	1.57269	0.0866098		53.9726	1	0.620882	0.699846	0.737855	0.06638	2.62867
54.5242	-1	1.22188	0.67832	1.09774	3.75998	0.654478		54.5471	-1	1.45545	2.62776	3.10355	1.17661	0.621433		54.6851	-1	1.48722	1.29916	1.97825	0.199319	3.56084		54.5388	1	1.89906	1.42781	NaN	1.56362	0.0896452		54.4726	1	0.589761	0.696561	0.73886	-0.0137919	2.63334
55.0242	-1	1.29246	0.661603	1.12338	3.72786	0.676372		55.0471	-1	1.27858	2.63002	3.12156	1.13381	0.589401		55.1851	-1	1.4488	1.32293	1.99432	0.28029	3.5575		55.0388	1	1.87298	1.35649	NaN	1.56652	0.0944742		54.9726	1	0.563711	0.690283	0.744827	-0.0159345	2.63199
55.5242	-1	1.32713	0.644612	1.14918	3.69057	0.696746		55.5471	-1	1.07841	2.64328	3.10406	1.09908	0.563308		55.6851	-1	1.40096	1.34945	2.00883	0.36336	3.54995		55.5388	1	1.73751	1.29497	NaN	1.52135	0.125838		55.4726	1	0.590744	0.663393	0.751461	-0.0195842	2.61952
56.0242	-1	1.35509	0.626332	1.17338	3.64823	0.721498		56.0471	-1	0.942951	2.64572	3.21898	1.15697	0.542496		56.1851	-1	1.31807	1.38139	2.01728	0.449461	3.52872		56.0388	0	1.55929	1.27394	NaN	1.48572	0.168866		55.9726	1	0.656311	0.621539	0.758579	-0.0243278	2.59896
56.5242	-1	1.36758	0.605079	1.19388	3.59427	0.756362		56.5471	-1	0.820264	2.64408	3.25923	1.22075	0.528304		56.6851	-1	1.24218	1.41739	2.0351	0.514555	3.49726		56.5388	0	1.38061	1.44599	NaN	1.59903	0.218818		56.4726	1	0.652357	0.589039	0.772086	-0.0126967	2.5442
57.0242	-1	1.3448	0.576857	1.2188	3.52813	0.79053		57.0471	-1	0.743095	2.62456	2.85863	1.2841	0.54737		57.1851	-1	1.17817	1.46026	2.06884	0.544	3.44845		57.0388	-1	1.20737	1.63252	NaN	1.69515	0.26943		56.9726	1	0.632042	0.559196	0.787839	0.00250279	2.48168
57.5242	-1	1.28714	0.541744	1.2481	3.44996	0.824009		57.5471	-1	0.692068	2.58664	2.63368	1.30996	0.576164		57.6851	-1	1.11615	1.50186	2.08395	0.564523	3.39471		57.5388	-1	1.03811	1.82958	NaN	1.77875	0.320523		57.4726	1	0.613394	0.543315	0.826568	0.00846433	2.42876
58.0242	0	1.2939	0.50992	1.29632	3.35935	0.926921		58.0471	-1	0.658557	2.53639	2.5264	1.31069	0.611478		58.1851	-1	1.05613	1.54217	2.08028	0.576052	3.33602		58.0388	-1	0.886184	2.02259	NaN	1.87952	0.343102		57.9726	1	0.553807	0.541003	0.870453	0.0456044	2.39918
58.5242	0	1.32789	0.479487	1.35255	3.26348	1.0592		58.5471	-1	0.654315	2.50656	2.26334	1.29601	0.637466		58.6851	-1	0.987121	1.57471	2.07683	0.575676	3.29674		58.5388	-1	0.760306	2.16204	NaN	1.94223	0.359627		58.4726	1	0.378667	0.576992	0.928892	0.17075	2.43549
59.0242	1	1.24001	0.459482	1.36788	3.16446	1.22227		59.0471	-1	0.644982	2.48901	2.09099	1.27863	0.655286		59.1851	-1	0.912167	1.60213	2.07352	0.567422	3.27031		59.0388	-1	0.703194	2.1348	NaN	1.87038	0.379783		58.9726	1	0.290962	0.614046	0.979658	0.238854	2.48204
59.5242	1	1.14671	0.442091	1.37616	3.06714	1.38706		59.5471	-1	0.622205	2.49928	2.13977	1.25569	0.654369		59.6851	-1	0.84622	1.6116	2.08531	0.561472	3.28829		59.5388	-1	0.712597	2.09801	NaN	1.80621	0.386996		59.4726	1	0.294554	0.652213	1.02241	0.247397	2.53928
60.0242	1	1.08386	0.454308	1.31624	2.9981	1.54924		60.0471	-1	0.585694	2.5019	2.11658	1.24473	0.642871		60.1851	-1	0.783731	1.61663	2.10078	0.556134	3.31676		60.0388	-1	0.774646	2.05368	NaN	1.74812	0.383963		59.9726	1	0.310555	0.688287	1.03997	0.250417	2.57677
60.5242	1	1.01196	0.474436	1.25353	2.93296	1.70454		60.5471	-1	0.540716	2.4998	2.04902	1.24116	0.624851		60.6851	-1	0.761839	1.60663	2.12799	0.553889	3.36924		60.5388	-1	0.901289	2.03475	NaN	1.70354	0.376097		60.4726	1	0.33144	0.723537	1.0476	0.251262	2.6065
61.0242	1	0.899641	0.52988	1.17835	2.88529	1.8291		61.0471	-1	0.472203	2.48074	2.20296	1.227	0.602727		61.1851	-1	0.743263	1.59643	2.15265	0.553475	3.41931		61.0388	-1	1.04171	2.03104	NaN	1.66826	0.362046		60.9726	1	0.417616	0.75725	1.03416	0.182034	2.53507
61.5242	1	0.839603	0.593608	1.11315	2.78257	1.92897		61.5471	-1	0.40809	2.45851	2.3817	1.21068	0.578391		61.6851	-1	0.746636	1.58492	2.16047	0.565188	3.4534		61.5388	-1	1.20278	2.05018	NaN	1.64695	0.338713		61.4726	1	0.51414	0.790718	1.01738	0.101702	2.44761
62.0242	1	0.857206	0.66964	1.06279	2.59813	1.99216		62.0471	-1	0.399178	2.43687	2.44962	1.19369	0.545285		62.1851	-1	0.749783	1.57397	2.14456	0.569646	3.48352		62.0388	-1	1.34784	2.07768	NaN	1.62456	0.309534		61.9726	0	0.665866	0.814608	0.979496	0.105669	2.30789
62.5242	1	0.843814	0.735258	1.06182	2.41998	2.06668		62.5471	-1	0.400415	2.4337	2.4948	1.18783	0.518604		62.6851	-1	0.752521	1.56402	2.08586	0.561014	3.50652		62.5388	-1	1.4796	2.11041	NaN	1.60121	0.276708		62.4726	-1	0.83423	0.837738	0.944748	0.113739	2.16834
63.0242	1	0.810737	0.794264	1.09221	2.24581	2.14838		63.0471	0	0.40873	2.44163	2.51706	1.18908	0.496463		63.1851	-1	0.783671	1.56165	2.03514	0.551928	3.50878		63.0388	-1	1.54849	2.13476	NaN	1.57219	0.249867		62.9726	-1	1.06764	0.858599	0.925393	0.130794	2.0347
63.5242	1	0.751505	0.824872	1.09052	2.0144	2.19683		63.5471	0	0.43787	2.44241	2.31588	1.19652	0.488978		63.6851	-1	0.835768	1.56486	1.9903	0.542508	3.49574		63.5388	-1	1.57263	2.17088	NaN	1.54403	0.219112		63.4726	-1	1.32917	0.878625	0.919293	0.139898	1.91391
64.0242	1	0.682774	0.845168	1.07717	1.76221	2.2332		64.0471	1	0.45608	2.43371	2.15967	1.19867	0.475921		64.1851	-1	0.874263	1.54433	1.9943	0.52943	3.50024		64.0388	-1	1.55198	2.21878	NaN	1.51671	0.184439		63.9726	-1	1.6304	0.897475	0.931907	0.137777	1.81122
64.5242	1	0.624141	0.86599	1.08772	1.6496	2.23701		64.5471	1	0.451	2.40481	2.09929	1.18957	0.450988		64.6851	0	0.909555	1.51821	2.0098	0.515492	3.50886		64.5388	-1	1.57724	2.17479	NaN	1.50602	0.16645		64.4726	-1	1.83227	0.923834	0.962947	0.142805	1.75225
65.0242	1	0.581839	0.888453	1.09696	1.54716	2.23141		65.0471	1	0.439666	2.34395	2.07617	1.12937	0.40917		65.1851	1	0.939372	1.52149	2.06327	0.523615	3.48292		65.0388	-1	1.61872	2.09831	NaN	1.5012	0.15436		64.9726	-1	1.98064	0.954236	1.00391	0.151681	1.71681
65.5242	1	0.615413	0.91866	1.09422	1.4602	2.18845		65.5471	1	0.432155	2.2826	2.06291	1.05505	0.366096		65.6851	1	0.961924	1.52581	2.12048	0.534075	3.45347		65.5388	-1	1.67659	2.06047	NaN	1.45531	0.154816		65.4726	-1	2.0794	0.954854	1.00495	0.16625	1.68217
66.0242	1	0.663131	0.941489	1.11432	1.428	2.13207		66.0471	1	0.438567	2.24079	2.05087	0.977484	0.330751		66.1851	1	0.935921	1.51855	2.17992	0.547018	3.4213		66.0388	0	1.72715	2.0936	NaN	1.44603	0.156045		65.9726	-1	2.1639	0.946914	0.994518	0.182454	1.64775
66.5242	1	0.732747	0.952891	1.1698	1.48059	2.0549		66.5471	1	0.459962	2.23617	2.01816	0.930277	0.302846		66.6851	1	0.903187	1.52701	2.23532	0.566746	3.39704		66.5388	0	1.75709	2.30528	NaN	1.53559	0.157884		66.4726	-1	2.06796	0.929469	0.951904	0.200724	1.66265
67.0242	1	0.738998	0.949735	1.202	1.57264	1.98924		67.0471	1	0.492235	2.25855	1.97045	0.905106	0.280344		67.1851	1	0.857306	1.56619	2.28286	0.599725	3.38822		67.0388	1	1.71214	2.58323	NaN	1.6232	0.164824		66.9726	-1	1.96513	0.909738	0.904207	0.219673	1.66742
67.5242	1	0.685144	0.93277	1.21212	1.70211	1.93448		67.5471	1	0.624049	2.29566	1.94775	0.911075	0.327061		67.6851	1	0.813074	1.59752	2.38086	0.624113	3.35397		67.5388	1	1.61287	2.90924	NaN	1.70939	0.175465		67.4726	-1	1.84751	0.882231	0.839843	0.240973	1.63255
68.0242	1	0.662673	0.924178	1.20789	1.90048	1.9135		68.0471	1	0.759026	2.33694	1.97125	0.922201	0.390568		68.1851	1	0.770054	1.62311	2.51593	0.642193	3.30104		68.0388	1	1.43781	3.12529	NaN	1.77135	0.156953		67.9726	-1	1.74385	0.884023	0.794561	0.273506	1.59883
68.5242	1	0.650541	0.918346	1.19893	2.12154	1.90364		68.5471	1	0.845678	2.38802	2.19029	0.937273	0.487206		68.6851	1	0.723639	1.65829	2.78151	0.684528	3.14851		68.5388	1	1.25691	3.22187	NaN	1.86007	0.140296		68.4726	-1	1.65719	0.921479	0.772507	0.319711	1.5665
69.0242	0	0.59113	0.943776	1.18056	2.20728	1.84782		69.0471	1	0.868871	2.41383	2.33155	0.92772	0.599225		69.1851	1	0.6757	1.69779	3.10562	0.737739	2.95132		69.0388	1	1.0841	3.13251	NaN	2.00235	0.134048		68.9726	-1	1.67673	0.951245	0.761735	0.367174	1.51891
69.5242	-1	0.555743	0.971177	1.16794	2.2804	1.78533		69.5471	1	0.822819	2.41207	2.38797	0.891296	0.728028		69.6851	1	0.672957	1.71669	3.38997	0.781878	2.8009		69.5388	1	0.956453	2.94897	NaN	2.10645	0.112443		69.4726	-1	1.77391	0.975388	0.759212	0.415557	1.46017
70.0242	-1	0.626294	1.00319	1.18045	2.31644	1.70023		70.0471	1	0.707912	2.38873	2.42569	0.86576	0.863826		70.1851	1	0.675363	1.7333	3.66998	0.825052	2.65579		70.0388	1	0.864174	2.77107	NaN	2.25385	0.0935952		69.9726	-1	1.89908	0.989497	0.764127	0.490989	1.42907
70.5242	-1	0.621701	1.03477	1.19724	2.30886	1.71621		70.5471	1	0.564211	2.35509	2.45109	0.844739	1.00256		70.6851	1	0.725725	1.78394	4.08022	0.928077	2.52939		70.5388	1	0.823825	2.6393	NaN	2.4997	0.0858389		70.4726	-1	2.03383	1.00017	0.771591	0.575688	1.40744
71.0242	-1	0.500851	1.0657	1.22066	2.23379	1.88857		71.0471	1	0.464741	2.27179	2.26242	0.81488	1.13729		71.1851	1	0.774393	1.8107	4.33588	0.998343	2.45819		71.0388	1	0.83542	2.48334	NaN	2.6307	0.0879427		70.9726	-1	2.04359	0.98247	0.773517	0.663822	1.38925
71.5242	-1	0.414831	1.09684	1.23237	2.15437	2.08481		71.5471	1	0.385999	2.18836	2.08477	0.788866	1.27068		71.6851	1	0.817473	1.7587	4.08156	0.96053	2.56911		71.5388	1	0.887382	2.31304	NaN	2.7086	0.108591		71.4726	-1	2.02878	0.961915	0.772688	0.751791	1.37053
72.0242	-1	0.413099	1.12853	1.21576	2.06444	2.33883		72.0471	1	0.381701	2.1044	1.94666	0.776658	1.39927		72.1851	1	0.856271	1.75693	3.84462	0.946894	2.57718		72.0388	1	1.02103	2.13758	NaN	2.87189	0.224848		71.9726	-1	1.97048	0.963076	0.750552	0.831179	1.33907
72.5242	-1	0.41155	1.15464	1.20819	1.95424	2.58545		72.5471	1	0.370591	2.02328	1.8112	0.765976	1.51782		72.6851	1	0.890004	1.81453	3.62823	0.961846	2.46365		72.5388	1	1.12475	2.0423	NaN	2.98404	0.341531		72.4726	-1	1.92171	0.967099	0.726974	0.901637	1.30723
73.0242	-1	0.434101	1.17127	1.19787	1.81438	2.75657		73.0471	1	0.350764	1.94579	1.67912	0.757247	1.62349		73.1851	1	0.874287	1.83429	3.18756	0.924695	2.3457		73.0388	1	1.20846	2.00055	NaN	3.06202	0.458499		72.9726	-1	1.89446	0.977582	0.700141	0.951933	1.27452
73.5242	-1	0.55798	1.15482	1.16473	1.57465	2.6187		73.5471	1	0.339412	1.88526	1.57932	0.752209	1.71532		73.6851	1	0.835	1.836	2.63999	0.862707	2.22565		73.5388	1	1.20928	1.96001	NaN	3.15416	0.546916		73.4726	-1	1.92564	0.986652	0.673992	0.975797	1.23053
74.0242	-1	0.643874	1.13159	1.13795	1.35494	2.49309		74.0471	1	0.332439	1.83348	1.4962	0.749076	1.79998		74.1851	1	0.819281	1.88964	2.50705	0.863573	2.02093		74.0388	1	1.18978	1.9186	NaN	3.24873	0.626934		73.9726	-1	2.00704	0.994507	0.64843	0.976943	1.17682
74.5242	-1	0.653613	1.09475	1.12392	1.17537	2.39206		74.5471	1	0.337066	1.79574	1.44831	0.747486	1.91442		74.6851	1	0.808713	1.95346	2.47697	0.880758	1.79711		74.5388	1	1.07098	1.81891	NaN	3.30704	0.601057		74.4726	-1	2.09237	1.00295	0.620445	1.10248	1.13192
75.0242	-1	0.66067	1.04745	1.09008	1.03018	2.29022		75.0471	1	0.344809	1.7606	1.40976	0.745983	2.03178		75.1851	1	0.750309	1.86343	2.11806	0.878369	1.71981		75.0388	1	0.957409	1.7022	NaN	3.35683	0.573487		74.9726	-1	2.17974	1.01169	0.591199	1.29279	1.09161
75.5242	-1	0.665565	0.991712	1.04025	0.912734	2.18775		75.5471	1	0.37178	1.73036	1.4277	0.741872	2.11841		75.6851	1	0.705856	1.77575	1.81192	0.886622	1.65076		75.5388	1	0.862446	1.52511	NaN	3.37636	0.539902		75.4726	-1	2.19057	0.997886	0.633337	1.50374	1.04024
76.0242	-1	0.613697	0.989372	1.0215	0.933893	2.11036		76.0471	1	0.389546	1.68695	1.48912	0.740344	2.20314		76.1851	1	0.703703	1.69518	1.66579	0.927146	1.60668		76.0388	1	0.805185	1.32351	NaN	3.3874	0.509807		75.9726	-1	2.18548	0.979457	0.687619	1.71732	0.990138
76.5242	-1	0.547031	1.00095	1.01085	0.99119	2.03951		76.5471	1	0.390932	1.6201	1.62792	0.743413	2.28451		76.6851	1	0.717977	1.61814	1.44452	0.99687	1.58114		76.5388	1	0.796103	1.09056	NaN	3.38756	0.484171		76.4726	-1	2.1322	0.947392	0.761748	1.92861	0.966309
77.0242	-1	0.456047	1.01304	1.03354	1.04924	1.95582		77.0471	1	0.373875	1.55539	1.7501	0.738555	2.33175		77.1851	1	0.750148	1.54494	1.14138	1.0984	1.57581		77.0388	1	0.798711	1.03621	NaN	3.39559	0.470397		76.9726	-1	2.05287	0.912438	0.838506	2.07096	0.943277
77.5242	0	0.367447	1.02549	1.05974	1.10368	1.87637		77.5471	1	0.347267	1.4918	1.86369	0.729592	2.36131		77.6851	1	0.817483	1.55003	1.1912	1.14557	1.51738		77.5388	1	0.802914	1.00622	NaN	3.40469	0.458241		77.4726	-1	1.91943	0.871485	0.920726	2.07015	0.921902
78.0242	0	0.326009	1.0402	1.07543	1.12846	1.84571		78.0471	1	0.310494	1.43012	1.99147	0.721963	2.40995		78.1851	1	0.901034	1.59124	1.4038	1.16767	1.43447		78.0388	1	0.779127	0.973778	NaN	3.45336	0.439645		77.9726	-1	1.79049	0.837373	0.967101	2.04774	0.915645
78.5242	1	0.305345	1.03479	1.0825	1.16053	1.83305		78.5471	1	0.277668	1.36907	2.10011	0.715265	2.46677		78.6851	1	0.987091	1.63215	1.57789	1.15146	1.42686		78.5388	1	0.751553	0.94142	NaN	3.50566	0.420696		78.4726	-1	1.66705	0.811589	0.96984	1.99904	0.927789
79.0242	1	0.326217	0.989146	1.07236	1.20717	1.85635		79.0471	1	0.294472	1.31138	2.01294	0.715519	2.57527		79.1851	1	1.06196	1.66817	1.74857	1.12351	1.42011		79.0388	1	0.659917	0.92294	NaN	3.56604	0.411667		78.9726	-1	1.57729	0.800346	0.96074	1.96046	0.948522
79.5242	1	0.356331	0.943737	1.04083	1.22778	1.91565		79.5471	1	0.309246	1.25907	1.99274	0.717169	2.65765		79.6851	1	1.05271	1.66877	1.93093	1.0463	1.34787		79.5388	1	0.563757	0.899508	NaN	3.62445	0.404054		79.4726	-1	1.50184	0.795281	0.94661	1.92617	0.972905
80.0242	1	0.393339	0.8985	0.993333	1.22897	2.00177		80.0471	1	0.319705	1.21821	2.11499	0.721786	2.68447		80.1851	1	1.03991	1.64381	2.01411	0.994041	1.30106		80.0388	1	0.451502	0.858456	NaN	3.67582	0.401477		79.9726	-1	1.43963	0.790415	0.92972	1.92281	0.970574
80.5242	1	0.363644	0.854343	0.954345	1.20801	2.09091		80.5471	1	0.331087	1.17904	2.23511	0.733646	2.68587		80.6851	1	1.01966	1.56523	1.88919	0.994156	1.3076		80.5388	1	0.351842	0.820371	NaN	3.70841	0.399787		80.4726	-1	1.41103	0.785185	0.913517	1.91551	0.962644
81.0242	1	0.316558	0.810469	0.917574	1.18127	2.18084		81.0471	1	0.343258	1.1413	2.35342	0.751691	2.66557		81.1851	0	0.992989	1.47928	1.7526	0.975185	1.26522		81.0388	1	0.268239	0.786069	NaN	3.71707	0.399225		80.9726	-1	1.55484	0.777945	0.902059	1.87497	0.9359
81.5242	1	0.25516	0.774524	0.951085	1.2086	2.30308		81.5471	1	0.320054	1.12087	2.52129	0.784842	2.56844		81.6851	0	0.960801	1.38698	1.60595	0.939782	1.18074		81.5388	1	0.202028	0.748136	NaN	3.7212	0.405419		81.4726	-1	1.69495	0.771124	0.886144	1.83916	0.906616
82.0242	1	0.201167	0.74131	0.988649	1.22998	2.42697		82.0471	1	0.284394	1.10654	2.70661	0.823312	2.44428		82.1851	-1	0.94097	1.27201	1.36993	0.900446	1.14538		82.0388	1	0.1456	0.708161	NaN	3.72279	0.415413		81.9726	-1	1.82931	0.764953	0.863324	1.81069	0.873397
82.5242	1	0.158788	0.712208	1.03155	1.24147	2.55299		82.5471	1	0.264883	1.08241	2.71421	0.877385	2.34306		82.6851	-1	0.925195	1.14959	1.10457	0.859817	1.12615		82.5388	1	0.115864	0.668587	NaN	3.71672	0.435099		82.4726	-1	1.88404	0.761859	0.848407	1.78126	0.857573
83.0242	1	0.117927	0.693107	1.08512	1.23884	2.69334		83.0471	1	0.254819	1.05858	2.6922	0.938062	2.24963		83.1851	-1	0.908928	1.04769	0.980959	0.780521	1.06228		83.0388	1	0.0919322	0.629817	NaN	3.71171	0.456444		82.9726	-1	1.85901	0.761847	0.841405	1.75087	0.859173
83.5242	1	0.0780276	0.68033	1.14544	1.22726	2.84275		83.5471	1	0.289131	1.0397	2.57508	1.02827	2.18942		83.6851	-1	0.891976	0.959219	0.861096	0.717302	0.998607		83.5388	1	0.0910599	0.602659	NaN	3.74292	0.479117		83.4726	-1	1.72726	0.776112	0.82377	1.74869	0.867191
84.0242	1	0.0430932	0.659058	1.15246	1.16369	2.98343		84.0471	1	0.333987	1.03533	2.51443	1.11455	2.13096		84.1851	-1	0.872411	0.921077	0.742588	0.72018	0.939902		84.0388	1	0.0922792	0.576143	NaN	3.76836	0.493332		83.9726	-1	1.55625	0.795631	0.802221	1.75688	0.877571
84.5242	1	0.0108542	0.637549	1.14958	1.08999	3.13082		84.5471	1	0.396091	1.05467	2.54615	1.1944	2.07534		84.6851	-1	0.864971	0.898705	0.81262	0.741288	0.874033		84.5388	1	0.0988773	0.551283	NaN	3.77897	0.485796		84.4726	-1	1.38824	0.800836	0.792197	1.78855	0.875163
85.0242	1	0.000211927	0.634805	1.15722	1.02068	3.38596		85.0471	1	0.440843	1.12296	2.63824	1.23529	2.03993		85.1851	-1	0.874471	0.898363	1.14603	0.787863	0.798156		85.0388	1	0.104555	0.530307	NaN	3.78613	0.474877		84.9726	-1	1.27097	0.803042	0.778796	1.81625	0.869329
85.5242	1	-0.000211927	0.623674	1.15416	0.957021	3.59231		85.5471	1	0.472977	1.22685	2.77424	1.24785	2.0192		85.6851	-1	0.875434	0.927472	1.46691	0.822058	0.726056		85.5388	1	0.108959	0.514715	NaN	3.78851	0.459268		85.4726	-1	1.36723	0.795132	0.749099	1.82309	0.851309
86.0242	1	0.0229369	0.593195	1.12643	0.906407	3.6861		86.0471	1	0.472751	1.35423	2.82713	1.19519	1.96707		86.1851	-1	0.871542	0.973335	1.78065	0.849209	0.656105		86.0388	1	0.0984673	0.496892	NaN	3.79172	0.44889		85.9726	-1	1.49939	0.804543	0.726507	1.81879	0.860279
86.5242	1	0.0540175	0.566905	1.11691	0.860688	3.78217		86.5471	1	0.464364	1.48754	2.85907	1.12608	1.90702		86.6851	-1	0.860687	0.953985	2.07966	0.945031	0.614912		86.5388	1	0.0795974	0.477814	NaN	3.7954	0.441454		86.4726	-1	1.69019	0.842263	0.715528	1.79627	0.913361
87.0242	1	0.0923322	0.544436	1.12399	0.819433	3.88032		87.0471	0	0.458445	1.63241	2.56535	1.02488	1.86282		87.1851	-1	0.853874	0.929791	2.36611	1.04913	0.578955		87.0388	1	0.0706002	0.469628	NaN	3.79266	0.440723		86.9726	-1	1.86959	0.870379	0.744406	1.78965	0.997447
87.5242	1	0.113969	0.514729	1.10461	0.790586	3.85657		87.5471	-1	0.463786	1.77119	2.23699	0.926746	1.81778		87.6851	-1	0.910275	0.99	2.53516	1.1021	0.542621		87.5388	1	0.0647274	0.46489	NaN	3.78789	0.442113		87.4726	-1	2.04196	0.892568	0.79788	1.79285	1.10066
88.0242	1	0.129838	0.482519	1.07609	0.766031	3.79066		88.0471	-1	0.527622	1.87238	1.87679	0.859773	1.76098		88.1851	-1	0.96023	1.05068	2.69316	1.1534	0.506799		88.0388	1	0.067503	0.447763	NaN	3.79398	0.437214		87.9726	-1	2.18048	0.925426	0.86519	1.79616	1.20033
88.5242	1	0.124351	0.465577	1.07449	0.741826	3.83646		88.5471	-1	0.588448	1.97081	1.64249	0.822586	1.765		88.6851	-1	0.974175	1.11398	2.78942	1.19534	0.47384		88.5388	1	0.0714512	0.43114	NaN	3.78383	0.432759		88.4726	-1	2.30363	0.957227	0.936	1.80256	1.29097
89.0242	1	0.116029	0.451463	1.07422	0.716614	3.89821		89.0471	-1	0.644348	2.06474	1.61429	0.834162	1.86858		89.1851	-1	0.997957	1.18236	2.90639	1.21593	0.435539		89.0388	1	0.0789396	0.417208	NaN	3.71518	0.43034		88.9726	-1	2.28379	0.940326	1.02105	1.85794	1.24887
89.5242	1	0.112719	0.440772	1.04792	0.682085	3.94357		89.5471	-1	0.682608	2.14037	1.67232	0.841016	1.96248		89.6851	-1	1.04818	1.26437	3.07901	1.17912	0.382881		89.5388	1	0.0873424	0.400269	NaN	3.66809	0.428403		89.4726	-1	2.25171	0.929925	1.08537	1.90427	1.19064
90.0242	1	0.115963	0.434247	1.02308	0.653	3.97848		90.0471	-1	0.709059	2.20377	1.78808	0.844709	2.04988		90.1851	-1	1.05762	1.33397	3.05926	1.16175	0.333873		90.0388	1	0.0969098	0.379501	NaN	3.64846	0.427077		89.9726	-1	2.18817	0.936221	1.09644	1.92738	1.09092
90.5242	1	0.134224	0.437272	1.00158	0.636389	3.98945		90.5471	-1	0.774705	2.25104	2.00257	0.865813	2.13686		90.6851	-1	1.02534	1.39086	2.84263	1.16429	0.288599		90.5388	1	0.0975429	0.361795	NaN	3.61366	0.422515		90.4726	-1	2.07738	0.93825	1.09997	1.95801	1.00121
91.0242	1	0.159591	0.433853	0.955196	0.634039	3.98057		91.0471	-1	0.857164	2.29139	2.25941	0.894387	2.22366		91.1851	-1	1.04043	1.39168	2.61886	1.1737	0.246136		91.0388	1	0.0917008	0.346307	NaN	3.56785	0.415605		90.9726	-1	1.91789	0.935882	1.09575	1.9964	0.921818
91.5242	1	0.19142	0.424577	0.88618	0.644652	3.95363		91.5471	-1	0.9048	2.307	2.33756	0.882107	2.17454		91.6851	-1	1.07335	1.37141	2.39241	1.1857	0.204729		91.5388	1	0.0890556	0.332743	NaN	3.55796	0.414111		91.4726	-1	1.76321	0.91952	1.11191	2.01521	0.888007
92.0242	1	0.210579	0.421863	0.818153	0.660321	3.93756		92.0471	-1	0.955709	2.32507	2.40216	0.867662	2.10962		92.1851	-1	1.14906	1.37904	2.16955	1.19647	0.169342		92.0388	1	0.0868757	0.319543	NaN	3.55603	0.413801		91.9726	-1	1.61083	0.896525	1.13774	2.02475	0.875803
92.5242	1	0.222686	0.422804	0.750676	0.678804	3.92755		92.5471	-1	1.04574	2.37176	2.47983	0.86197	2.02073		92.6851	-1	1.22718	1.38825	1.94689	1.20717	0.134295		92.5388	1	0.0684285	0.300618	NaN	3.505	0.405399		92.4726	-1	1.46956	0.870427	1.18111	2.01059	0.87266
93.0242	1	0.2246	0.401069	0.65	0.694154	3.83683		93.0471	-1	1.09828	2.41391	2.48964	0.851251	1.93651		93.1851	-1	1.38234	1.35395	1.91914	1.13973	0.122633		93.0388	1	0.0527266	0.292054	NaN	3.45521	0.400598		92.9726	-1	1.33208	0.843722	1.22889	1.99028	0.871616
93.5242	1	0.222984	0.371483	0.537828	0.70842	3.71816		93.5471	-1	1.08393	2.44797	2.37839	0.831561	1.86063		93.6851	-1	1.52584	1.31687	1.91136	1.07655	0.112699		93.5388	1	0.0457374	0.316369	NaN	3.40937	0.407227		93.4726	-1	1.24092	0.827704	1.26801	1.97234	0.856507
94.0242	1	0.227456	0.357754	0.474149	0.734046	3.64929		94.0471	-1	1.07995	2.49192	2.26029	0.798948	1.77708		94.1851	-1	1.57533	1.28037	1.94344	1.06622	0.103791		94.0388	1	0.0395482	0.343326	NaN	3.37382	0.425629		93.9726	-1	1.15268	0.815266	1.29103	1.96165	0.846107
94.5242	1	0.233599	0.341606	0.414139	0.767926	3.55545		94.5471	-1	1.08413	2.54364	2.13681	0.756165	1.6875		94.6851	0	1.61269	1.25096	1.98076	1.04517	0.0962874		94.5388	1	0.0342286	0.373154	NaN	3.34947	0.456825		94.4726	-1	1.07488	0.815583	1.25669	1.97679	0.852479
95.0242	1	0.245931	0.31483	0.365352	0.833644	3.35957		95.0471	-1	1.05559	2.53315	2.00972	0.710413	1.61812		95.1851	1	1.62798	1.23446	2.02762	1.00461	0.0913389		95.0388	1	0.0382169	0.351557	NaN	3.348	0.500882		94.9726	-1	1.01516	0.819046	1.21016	1.98324	0.862797
95.5242	1	0.259518	0.29356	0.344756	0.892982	3.21316		95.5471	-1	1.01781	2.5051	1.88161	0.663823	1.55444		95.6851	1	1.62481	1.22191	2.04615	0.996299	0.0882743		95.5388	1	0.0484157	0.295649	NaN	3.3618	0.55352		95.4726	-1	0.977388	0.82633	1.14883	1.97913	0.877901
96.0242	1	0.27512	0.281138	0.369461	0.942071	3.14623		96.0471	-1	0.974644	2.45527	1.73118	0.619962	1.48951		96.1851	1	1.59254	1.2156	2.01997	1.03887	0.0881812		96.0388	1	0.058669	0.229341	NaN	3.39244	0.576193		95.9726	-1	1.01247	0.826658	1.09235	1.96634	0.920836
96.5242	1	0.299492	0.268896	0.403656	0.983911	3.03432		96.5471	-1	0.936552	2.40747	1.58331	0.579854	1.43132		96.6851	1	1.62243	1.22311	1.98221	1.0044	0.0972684		96.5388	1	0.069066	0.159869	NaN	3.42072	0.592687		96.4726	-1	1.10167	0.82182	1.03946	1.94708	0.984442
97.0242	1	0.329649	0.256773	0.444111	1.02097	2.89274		97.0471	-1	0.916563	2.36696	1.44463	0.553125	1.39718		97.1851	1	1.69145	1.23933	1.93715	0.921427	0.112137		97.0388	1	0.08155	0.072311	NaN	3.36097	0.603132		96.9726	-1	1.20033	0.819061	0.997803	1.82146	1.05785
97.5242	1	0.341156	0.247245	0.48116	1.04075	2.79871		97.5471	-1	0.891557	2.34263	1.3172	0.532088	1.36701		97.6851	1	1.70892	1.24656	2.05149	0.860932	0.178073		97.5388	1	0.0856766	0.0165313	NaN	3.28962	0.625814		97.4726	-1	1.30135	0.816813	0.958949	1.66944	1.13371
98.0242	1	0.348381	0.238448	0.516746	1.05822	2.71336		98.0471	-1	0.859595	2.34076	1.20536	0.518944	1.34235		98.1851	1	1.71287	1.25097	2.20099	0.804379	0.255143		98.0388	1	0.0703028	0.0349004	NaN	3.19118	0.677051		97.9726	-1	1.41428	0.811478	0.936955	1.52069	1.23343
98.5242	1	0.351295	0.232262	0.54152	1.09595	2.60622		98.5471	-1	0.834127	2.35209	1.11918	0.505407	1.31433		98.6851	1	1.6081	1.2157	2.39001	0.707755	0.338954		98.5388	1	0.060406	0.0433137	NaN	3.08569	0.764297		98.4726	-1	1.50843	0.805888	0.911624	1.37313	1.33201
99.0242	1	0.348158	0.225846	0.565875	1.13148	2.49779		99.0471	-1	0.812314	2.37085	1.04744	0.491648	1.28442		99.1851	1	1.50175	1.18292	2.58152	0.637979	0.421702		99.0388	1	0.0555606	0.0425444	NaN	2.97371	0.884758		98.9726	-1	1.53497	0.799382	0.874284	1.22988	1.42652
99.5242	1	0.329693	0.218849	0.589165	1.16144	2.38612		99.5471	-1	0.776679	2.37239	0.98672	0.475604	1.25769		99.6851	1	1.39039	1.15797	2.78087	0.652852	0.501102		99.5388	1	0.0484361	0.0492792	NaN	2.8993	1.06837		99.4726	-1	1.55187	0.787592	0.843055	1.12002	1.51998
100.024	1	0.32068	0.232253	0.611186	1.11618	2.29193		100.047	-1	0.73665	2.36846	0.929508	0.458834	1.23197		100.185	1	1.29492	1.12164	2.89405	0.672911	0.559014		100.039	1	0.0405041	0.0586727	NaN	2.83821	1.27437		99.9726	-1	1.54943	0.765208	0.824076	1.0771	1.61133
100.524	1	0.320259	0.264205	0.632052	1.00254	2.21363		100.547	-1	0.712506	2.37504	0.881414	0.443175	1.18904		100.685	1	1.21764	1.07227	2.90865	0.698903	0.592341		100.539	1	0.0503183	0.0561238	NaN	2.76499	1.44194		100.473	-1	1.51739	0.743595	0.810153	1.04945	1.69281
101.024	1	0.322176	0.278925	0.638044	0.926513	2.16258		101.047	-1	0.689478	2.38306	0.832436	0.428834	1.1468		101.185	1	1.19368	1.05285	2.91532	0.735172	0.609345		101.039	1	0.0628591	0.0517854	NaN	2.68687	1.60646		100.973	-1	1.46329	0.722556	0.799996	1.03317	1.76693
101.524	1	0.32482	0.28828	0.639405	0.862199	2.12002		101.547	-1	0.67546	2.405	0.771191	0.429301	1.11644		101.685	0	1.20727	1.05451	2.91642	0.778678	0.614855		101.539	1	0.0983499	0.0325277	NaN	2.55777	1.75445		101.473	-1	1.38323	0.697683	0.797486	1.01683	1.83627
102.024	1	0.31722	0.30749	0.633197	0.745624	2.0738		102.047	-1	0.66575	2.43261	0.725252	0.430258	1.08446		102.185	0	1.19061	1.06775	2.91349	0.797575	0.6119		102.039	1	0.174138	0.0423761	NaN	2.44322	1.88059		101.973	-1	1.29132	0.67106	0.798467	1.00047	1.90345
102.524	1	0.306441	0.329758	0.624641	0.612834	2.02643		102.547	-1	0.666124	2.47345	0.715131	0.432362	1.04871		102.685	-1	1.16624	1.08407	2.90945	0.810017	0.606626		102.539	1	0.353547	0.127069	NaN	2.36611	1.95058		102.473	-1	1.19338	0.652288	0.791262	0.982466	1.97565
103.024	1	0.300596	0.319133	0.612958	0.577238	2.05204		103.047	-1	0.664718	2.50726	0.740876	0.439631	1.02638		103.185	-1	1.15091	1.11257	2.8978	0.81041	0.586305		103.039	1	0.533601	0.229124	NaN	2.29909	2.00121		102.973	-1	1.09706	0.632898	0.781452	0.962913	2.04489
103.524	1	0.308501	0.321391	0.607939	0.63704	2.10513		103.547	-1	0.661665	2.53456	0.799806	0.451682	1.01647		103.685	-1	1.13638	1.14827	2.89928	0.806788	0.575797		103.539	1	0.714364	0.350246	NaN	2.24313	2.03059		103.473	-1	1.01352	0.605958	0.759638	0.934651	2.09353
104.024	1	0.338519	0.345375	0.613786	0.848553	2.20073		104.047	-1	0.657994	2.5473	0.869637	0.46196	1.00521		104.185	-1	1.12428	1.20574	2.94046	0.791028	0.594945		104.039	1	0.93655	0.496555	NaN	2.23154	2.01289		103.973	-1	0.93052	0.579446	0.738738	0.903232	2.13903
104.524	1	0.371476	0.365625	0.615708	1.0889	2.35399		104.547	-1	0.653975	2.55184	0.945604	0.47124	0.993189		104.685	-1	1.12414	1.26281	2.84548	0.770856	0.576171		104.539	1	1.17656	0.6537	NaN	2.23902	1.97493		104.473	-1	0.848448	0.55366	0.719388	0.866462	2.17921
105.024	1	0.406241	0.38358	0.615218	1.34695	2.54267		105.047	-1	0.64719	2.54186	1.01476	0.493713	0.982068		105.185	-1	1.13721	1.31944	2.6001	0.745813	0.515517		105.039	1	1.16331	0.588611	NaN	2.38485	1.87052		104.973	-1	0.785789	0.528303	0.696291	0.839203	2.20156
105.524	1	0.436874	0.385758	0.581083	1.60778	2.60495		105.547	-1	0.638587	2.53132	1.08419	0.517593	0.96976		105.685	-1	1.10426	1.39497	2.29907	0.708695	0.453591		105.539	1	1.11956	0.500728	NaN	2.54468	1.76075		105.473	-1	0.735995	0.503229	0.670711	0.818248	2.21209
106.024	1	0.473282	0.384251	0.541159	1.84721	2.64452		106.047	-1	0.608067	2.55108	1.17667	0.528576	0.935822		106.185	-1	1.0469	1.48053	1.9685	0.665174	0.390992		106.039	1	1.03108	0.394388	NaN	2.71508	1.65308		105.973	-1	0.696465	0.480239	0.655564	0.802282	2.25559
106.524	1	0.580137	0.369681	0.496045	1.84728	2.65399		106.547	-1	0.577123	2.56785	1.24844	0.537374	0.899309		106.685	-1	1.04939	1.57337	1.62225	0.628288	0.379358		106.539	1	0.901017	0.289685	NaN	2.87124	1.56701		106.473	-1	0.660907	0.458054	0.644456	0.788245	2.31184
107.024	1	0.685811	0.353483	0.490696	1.85784	2.64563		107.047	-1	0.544967	2.57604	1.26101	0.539929	0.855438		107.185	-1	1.05918	1.66249	1.31136	0.591913	0.390179		107.039	1	0.703101	0.187654	NaN	3.00415	1.51615		106.973	-1	0.629505	0.444141	0.641964	0.780448	2.33863
107.524	1	0.790321	0.335682	0.524482	1.87871	2.61972		107.547	-1	0.511682	2.58351	1.25702	0.538169	0.814306		107.685	-1	1.05891	1.71484	1.29044	0.552132	0.517708		107.539	1	0.576095	0.171916	NaN	3.07385	1.57561		107.473	-1	0.598062	0.430847	0.639926	0.772982	2.36348
108.024	1	0.893477	0.291825	0.563668	1.89901	2.54433		108.047	-1	0.477179	2.5902	1.2351	0.531742	0.776136		108.185	-1	1.06568	1.759	1.27908	0.513933	0.651088		108.039	1	0.519885	0.242334	NaN	3.08043	1.7452		107.973	-1	0.556341	0.417816	0.632498	0.761654	2.3953
108.524	1	0.99606	0.23696	0.605135	1.91908	2.44804		108.547	0	0.477646	2.58899	1.21756	0.5301	0.740533		108.685	-1	1.08998	1.7827	1.29158	0.479678	0.79906		108.539	1	0.519946	0.247636	NaN	3.06059	1.85841		108.473	-1	0.514868	0.406836	0.624915	0.748958	2.42281
109.024	1	1.00477	0.162595	0.625542	1.89392	2.28831		109.047	0	0.493129	2.5844	1.20191	0.530512	0.706032		109.185	-1	1.07724	1.78695	1.3077	0.443782	0.932118		109.039	1	0.567827	0.197603	NaN	3.0183	1.9237		108.973	-1	0.474101	0.401701	0.616887	0.73236	2.43807
109.524	1	1.01202	0.0920371	0.617065	1.81792	2.10275		109.547	1	0.573281	2.6094	1.40069	0.537046	0.698899		109.685	-1	1.00685	1.76092	1.32944	0.405334	1.04197		109.539	1	0.630321	0.20157	NaN	3.00707	1.9509		109.473	-1	0.435295	0.392544	0.605149	0.718825	2.45852
110.024	1	1.03565	0.0327323	0.557765	1.65415	1.88086		110.047	1	0.661514	2.63189	1.61636	0.542465	0.695529		110.185	-1	0.934627	1.74551	1.34275	0.370309	1.14858		110.039	1	0.696937	0.220769	NaN	3.00459	1.96735		109.973	-1	0.399215	0.377801	0.588257	0.709544	2.48619
110.524	1	1.06069	2.85153e-05	0.510327	1.47124	1.75053		110.547	1	0.764773	2.62296	1.82099	0.537729	0.700631		110.685	0	0.860589	1.74067	1.34765	0.338693	1.25197		110.539	1	0.73045	0.213412	NaN	2.97623	1.8007		110.473	-1	0.374016	0.360572	0.573233	0.697349	2.50811
111.024	1	1.08682	-0.0120444	0.472089	1.27347	1.69122		111.047	1	0.868039	2.60999	2.01184	0.531619	0.710474		111.185	0	0.800399	1.74312	1.36362	0.313443	1.34211		111.039	1	0.765046	0.2064	NaN	2.94697	1.64014		110.973	-1	0.358058	0.341232	0.559793	0.682679	2.52516
111.524	1	1.10183	-0.0126745	0.429764	1.08409	1.63778		111.547	1	0.971316	2.58979	2.17812	0.523056	0.728772		111.685	1	0.745055	1.74811	1.38345	0.290419	1.4276		111.539	1	0.825536	0.207725	NaN	2.89651	1.62508		111.473	-1	0.37671	0.333405	0.637101	0.667093	2.53355
112.024	0	1.11363	-0.0100776	0.386325	0.89752	1.58615		112.047	1	1.03333	2.53164	2.24748	0.515589	0.731987		112.185	1	0.712569	1.75796	1.40606	0.282735	1.50285		112.039	1	0.87773	0.202122	NaN	2.83747	1.60559		111.973	-1	0.405157	0.328957	0.740744	0.6512	2.53933
112.524	0	1.08879	0.00974847	0.349217	0.876758	1.59141		112.547	1	1.05068	2.43241	2.21194	0.509306	0.718874		112.685	1	0.682315	1.76614	1.43058	0.273603	1.59106		112.539	1	0.906266	0.176756	NaN	2.754	1.57345		112.473	-1	0.373538	0.33195	0.835231	0.626147	2.52272
113.024	-1	1.06718	0.0307588	0.31668	0.858467	1.59521		113.047	1	1.0553	2.34214	2.1357	0.518505	0.707381		113.185	1	0.658379	1.76711	1.46243	0.256954	1.7321		113.039	1	0.944607	0.159256	NaN	2.65945	1.5414		112.973	-1	0.351086	0.340764	0.925161	0.593499	2.50986
113.524	-1	1.06878	0.0602597	0.316924	0.857889	1.58852		113.547	1	1.05447	2.25571	2.04204	0.534334	0.696581		113.685	1	0.632395	1.76557	1.48871	0.239218	1.87282		113.539	1	0.992793	0.149654	NaN	2.55378	1.50945		113.473	-1	0.396364	0.392586	0.98142	0.504736	2.52474
114.024	-1	1.06395	0.0827032	0.336577	0.877857	1.58933		114.047	1	0.996566	2.14986	2.0628	0.559604	0.672461		114.185	1	0.601805	1.75838	1.50249	0.219041	2.0128		114.039	1	0.982314	0.179588	NaN	2.48277	1.44556		113.973	-1	0.407859	0.44746	1.02746	0.422729	2.4805
114.524	-1	1.04679	0.0916166	0.393439	0.937214	1.60451		114.547	1	0.939919	2.05864	2.10412	0.582553	0.64722		114.685	1	0.569265	1.74907	1.49818	0.192558	2.1508		114.539	1	0.932529	0.236013	NaN	2.43497	1.36027		114.473	-1	0.358188	0.50786	1.05501	0.352955	2.3292
115.024	-1	1.02067	0.0857731	0.442347	0.97041	1.58623		115.047	1	0.922066	2.06862	2.2106	0.585992	0.622267		115.185	1	0.534379	1.73718	1.47213	0.158487	2.28642		115.039	1	0.964096	0.247861	NaN	2.31641	1.42557		114.973	-1	0.362492	0.570753	1.08036	0.29017	2.26696
115.524	-1	0.987594	0.0684473	0.485065	0.98325	1.5419		115.547	1	0.905022	2.09962	2.30687	0.589217	0.587921		115.685	1	0.515275	1.7368	1.45419	0.128697	2.34984		115.539	1	1.01415	0.249101	NaN	2.18367	1.52479		115.473	-1	0.406105	0.635461	1.10411	0.232474	2.26959
116.024	-1	0.934639	0.0518372	0.524806	0.991216	1.49321		116.047	1	0.889421	2.16815	2.38491	0.592057	0.536821		116.185	1	0.508144	1.74515	1.44242	0.102156	2.3585		116.039	1	1.09046	0.212233	NaN	2.12228	1.65806		115.973	-1	0.395247	0.673734	1.15696	0.250897	2.17775
116.524	-1	0.876202	0.0354246	0.563727	0.997836	1.44332		116.547	1	0.895477	2.22672	2.59635	0.588029	0.513775		116.685	1	0.51606	1.74719	1.47633	0.0754044	2.38833		116.539	1	1.16437	0.192616	NaN	2.05949	1.8097		116.473	-1	0.369335	0.704661	1.21784	0.290412	2.05979
117.024	-1	0.952528	0.0588488	0.529485	0.97618	1.36614		117.047	1	0.917215	2.27807	2.90438	0.579026	0.511043		117.185	1	0.527968	1.74764	1.52237	0.0488203	2.42405		117.039	1	1.23075	0.227505	NaN	1.99225	2.01943		116.973	-1	0.445774	0.717635	1.18612	0.283513	2.07819
117.524	-1	1.04398	0.0865153	0.506596	0.956254	1.28802		117.547	1	0.892617	2.28074	3.24797	0.583056	0.510093		117.685	1	0.543534	1.75078	1.57959	0.0327068	2.47797		117.539	1	1.31617	0.264101	NaN	1.97088	2.174		117.473	-1	0.521212	0.730417	1.15661	0.282232	2.06115
118.024	-1	1.1395	0.11402	0.598179	0.96472	1.22178		118.047	0	0.854985	2.26987	3.60291	0.590668	0.510166		118.185	1	0.558674	1.75355	1.63656	0.0167674	2.5326		118.039	1	1.42388	0.302693	NaN	2.0032	2.26402		117.973	-1	0.593137	0.742519	1.13483	0.300687	1.91961
118.524	-1	1.26231	0.145434	0.683586	0.981013	1.1572		118.547	0	0.821449	2.27208	4.02446	0.592823	0.53699		118.685	1	0.555754	1.74087	1.68303	0.00821824	2.61732		118.539	1	1.53767	0.365838	NaN	1.97342	2.32441		118.473	-1	0.682323	0.75654	1.11861	0.30169	1.80242
119.024	-1	1.43319	0.183732	0.758118	1.01109	1.09554		119.047	-1	0.784187	2.28708	4.35519	0.591773	0.563831		119.185	1	0.552903	1.73077	1.72575	0.000727145	2.69753		119.039	1	1.65587	0.446851	NaN	1.89845	2.36324		118.973	-1	0.805898	0.774384	1.11345	0.267925	1.73375
119.524	-1	1.55884	0.212402	0.865257	0.972167	1.03299		119.547	-1	0.735128	2.34264	4.39832	0.580578	0.590723		119.685	1	0.550499	1.73737	1.74421	8.57309e-05	2.74858		119.539	1	1.81813	0.4913	NaN	1.84586	2.36564		119.473	-1	0.937294	0.794141	1.11901	0.245607	1.6576
120.024	-1	1.64946	0.233616	0.997644	0.879815	0.969762		120.047	-1	0.691315	2.417	4.37412	0.564507	0.632746		120.185	1	0.548721	1.73729	1.75111	-0.000564968	2.78535		120.039	1	1.99278	0.52546	NaN	1.79956	2.35778		119.973	-1	1.07449	0.815317	1.13253	0.231785	1.57588
120.524	-1	1.75229	0.252345	1.04305	0.870754	0.923287		120.547	-1	0.653675	2.51351	4.27067	0.542696	0.692575		120.685	1	0.548046	1.72541	1.73756	-0.00123207	2.79693		120.539	1	2.07874	0.620059	NaN	1.77587	2.32584		120.473	-1	1.24065	0.843243	1.17744	0.213735	1.50936
121.024	-1	1.85849	0.270389	1.0645	0.884641	0.881428		121.047	-1	0.604179	2.59452	4.16114	0.536998	0.736017		121.185	0	0.547825	1.71668	1.72325	-8.23689e-05	2.83718		121.039	1	2.13717	0.69914	NaN	1.76909	2.27663		120.973	-1	1.41905	0.874024	1.23562	0.193897	1.44927
121.524	-1	1.82687	0.305908	1.05789	0.924332	0.808785		121.547	-1	0.549083	2.6682	4.04874	0.53891	0.77172		121.685	0	0.548091	1.71133	1.70812	0.00301672	2.90819		121.539	1	2.0725	0.649823	NaN	1.85497	2.1333		121.473	-1	1.5138	0.897562	1.29415	0.204235	1.39343
122.024	-1	1.77768	0.341469	1.0479	1.00057	0.742607		122.047	-1	0.499667	2.74402	3.67272	0.554461	0.803544		122.185	-1	0.543255	1.70523	1.68866	0.00588722	3.01005		122.039	1	1.96118	0.595563	NaN	1.95038	1.98124		121.973	-1	1.5837	0.92074	1.35226	0.220238	1.33999
122.524	-1	1.71157	0.366136	1.0356	1.27834	0.73461		122.547	-1	0.458746	2.81519	3.28465	0.572927	0.838969		122.685	-1	0.535558	1.6987	1.66678	0.00862959	3.12922		122.539	1	1.76678	0.532502	NaN	2.06276	1.8136		122.473	-1	1.56568	0.944181	1.40845	0.253449	1.29606
123.024	-1	1.65183	0.389575	1.03303	1.50025	0.723888		123.047	-1	0.47592	2.85011	3.03004	0.601448	0.90432		123.185	-1	0.522942	1.69161	1.67391	0.0120479	3.25309		123.039	1	1.53873	0.439071	NaN	2.18315	1.64812		122.973	-1	1.51351	0.961901	1.44999	0.28492	1.26332
123.524	-1	1.60424	0.410675	1.049	1.61577	0.707977		123.547	-1	0.499271	2.86258	2.73096	0.618494	0.982577		123.685	-1	0.509266	1.68438	1.68729	0.0156117	3.37797		123.539	1	1.2742	0.31274	NaN	2.31224	1.48496		123.473	-1	1.41114	0.971216	1.47	0.313834	1.247
124.024	-1	1.54454	0.428756	1.03323	1.71114	0.698043		124.047	-1	0.534614	2.83148	2.34558	0.613264	1.08589		124.185	-1	0.521842	1.68678	1.69054	0.0152668	3.44405		124.039	1	1.05465	0.251857	NaN	2.39718	1.39128		123.973	-1	1.32041	0.979845	1.48901	0.334936	1.22295
124.524	-1	1.47079	0.44333	0.980607	1.78311	0.695046		124.547	-1	0.642448	2.78955	2.08755	0.608417	1.20115		124.685	-1	0.534308	1.68888	1.69122	0.0161226	3.49949		124.539	1	0.876493	0.251197	NaN	2.4415	1.36152		124.473	-1	1.23611	0.988093	1.50747	0.351728	1.19462
125.024	-1	1.37601	0.458234	0.939988	1.81351	0.673102		125.047	-1	0.817196	2.73763	1.94707	0.603925	1.32744		125.185	-1	0.537013	1.68614	1.68221	0.0245404	3.5206		125.039	1	0.791551	0.241475	NaN	2.4608	1.34811		124.973	-1	1.16102	0.988264	1.51063	0.374541	1.16917
125.524	-1	1.27147	0.47329	0.90494	1.82462	0.642364		125.547	-1	0.957751	2.66766	1.72201	0.600728	1.45361		125.685	-1	0.538806	1.68189	1.67833	0.0332697	3.54838		125.539	1	0.739225	0.228583	NaN	2.47134	1.34042		125.473	-1	1.0876	0.98719	1.51133	0.398828	1.14399
126.024	-1	1.12419	0.497468	0.84376	1.78522	0.60159		126.047	-1	1.085	2.59065	1.46402	0.598035	1.57973		126.185	-1	0.538269	1.67381	1.68751	0.0427937	3.59319		126.039	1	0.736284	0.274946	NaN	2.38142	1.32574		125.973	-1	1.06063	0.987845	1.49848	0.529995	1.08539
126.524	-1	0.968991	0.52307	0.778665	1.73574	0.558728		126.547	0	1.17087	2.54104	1.43272	0.598644	1.71788		126.685	-1	0.526702	1.6568	1.66828	0.0487825	3.63072		126.539	0	0.726347	0.309437	NaN	2.29253	1.32589		126.473	-1	1.02867	0.988423	1.48251	0.666115	1.03412
127.024	-1	0.882816	0.526852	0.780594	1.74781	0.525902		127.047	1	1.23056	2.49055	1.41374	0.598526	1.85224		127.185	-1	0.504446	1.63112	1.62151	0.0513446	3.66119		127.039	0	0.684308	0.291488	NaN	2.2161	1.38599		126.973	-1	0.97729	0.988701	1.45449	0.821465	1.01132
127.524	-1	0.805173	0.536273	0.783568	1.74971	0.485614		127.547	1	1.16698	2.4261	1.38249	0.593472	1.96267		127.685	-1	0.505825	1.60986	1.57803	0.0494149	3.67397		127.539	-1	0.62833	0.291245	NaN	2.13765	1.44638		127.473	-1	0.978126	0.997543	1.41327	0.963301	1.00093
128.024	-1	0.749909	0.560484	0.789278	1.72494	0.42575		128.047	1	1.0988	2.3607	1.36564	0.588538	2.06925		128.185	-1	0.516125	1.59026	1.53579	0.0457899	3.68007		128.039	-1	0.528306	0.346949	NaN	2.05283	1.50771		127.973	-1	1.04483	1.01719	1.35539	1.08809	1.00617
128.524	-1	0.694356	0.582716	0.796201	1.73516	0.386301		128.547	1	1.0187	2.29284	1.38602	0.583917	2.1659		128.685	-1	0.550546	1.59088	1.49208	0.0468134	3.63845		128.539	-1	0.436059	0.373114	NaN	2.00028	1.57396		128.473	-1	1.08635	1.03934	1.28786	1.14957	1.00176
129.024	-1	0.638508	0.602932	0.804359	1.78104	0.367664		129.047	1	0.953754	2.20005	1.36488	0.583389	2.25124		129.185	-1	0.590518	1.59575	1.44966	0.0490747	3.58762		129.039	-1	0.354525	0.35859	NaN	1.99219	1.647		128.973	-1	1.11509	1.06277	1.21543	1.17889	0.992439
129.524	-1	0.60261	0.608652	0.82199	1.82644	0.344293		129.547	1	0.913555	2.06648	1.27587	0.589553	2.31808		129.685	-1	0.648804	1.60252	1.46273	0.0606916	3.56179		129.539	-1	0.29054	0.374722	NaN	2.03906	1.64795		129.473	-1	1.1434	1.08427	1.12107	1.17751	0.958658
130.024	-1	0.573868	0.609171	0.843017	1.87166	0.319224		130.047	1	0.869038	1.94885	1.26063	0.595167	2.36273		130.185	-1	0.708109	1.60931	1.4775	0.0709372	3.54006		130.039	-1	0.237265	0.409563	NaN	2.11947	1.60492		129.973	-1	1.16016	1.1026	1.02387	1.1738	0.921891
130.524	-1	0.54083	0.598667	0.855723	1.96135	0.341532		130.547	1	0.82162	1.84192	1.29495	0.60041	2.39246		130.685	-1	0.770715	1.61616	1.49781	0.0767388	3.53164		130.539	-1	0.222626	0.415428	NaN	2.18689	1.56597		130.473	-1	1.07655	1.09556	0.927253	1.18518	0.887311
131.024	-1	0.515195	0.589186	0.866981	2.05772	0.357194		131.047	1	0.778449	1.74441	1.29615	0.580199	2.38957		131.185	-1	0.828246	1.61863	1.50964	0.0828951	3.52567		131.039	-1	0.216225	0.41864	NaN	2.24874	1.52926		130.973	-1	1.00348	1.09105	0.842918	1.19395	0.854165
131.524	-1	0.520339	0.585051	0.873181	2.1768	0.340646		131.547	1	0.736217	1.64898	1.29003	0.554363	2.37948		131.685	-1	0.879749	1.61591	1.51139	0.089473	3.52263		131.539	-1	0.223944	0.465891	NaN	2.2623	1.5153		131.473	-1	0.96721	1.09539	0.801429	1.19367	0.826026
132.024	-1	0.536035	0.580091	0.877134	2.29216	0.33802		132.047	1	0.677984	1.54677	1.32095	0.557425	2.34266		132.185	-1	0.914526	1.62278	1.50917	0.0913662	3.50688		132.039	0	0.24257	0.51505	NaN	2.27198	1.50973		131.973	-1	0.930443	1.08775	0.774634	1.21564	0.796886
132.524	-1	0.566543	0.573973	0.877931	2.40231	0.354936		132.547	1	0.616781	1.44052	1.33485	0.562615	2.29678		132.685	-1	0.936085	1.63723	1.50381	0.0895575	3.48111		132.539	0	0.286648	0.568659	NaN	2.2726	1.52375		132.473	-1	0.8931	1.06624	0.764854	1.26338	0.766588
133.024	-1	0.589018	0.550126	0.86995	2.43568	0.340748		133.047	1	0.546666	1.31786	1.26097	0.56921	2.21742		133.185	-1	0.923135	1.63304	1.52182	0.0993884	3.39604		133.039	1	0.365967	0.608629	NaN	2.24826	1.54146		132.973	-1	0.876457	1.04657	0.775156	1.31067	0.738225
133.524	-1	0.604517	0.510881	0.854346	2.40237	0.299548		133.547	1	0.480777	1.20827	1.17774	0.587399	2.19536		133.685	-1	0.892105	1.61908	1.55207	0.115318	3.27989		133.539	1	0.47774	0.636039	NaN	2.20093	1.56257		133.473	-1	0.871297	1.02793	0.796598	1.35772	0.710935
134.024	-1	0.650676	0.479034	0.846064	2.36475	0.291293		134.047	1	0.421817	1.12009	1.07916	0.624599	2.26724		134.185	-1	0.86722	1.60412	1.78134	0.152726	3.25285		134.039	1	0.589324	0.686771	NaN	2.17098	1.60641		133.973	-1	0.84029	0.99728	0.794717	1.4406	0.680866
134.524	-1	0.705697	0.449325	0.839897	2.32588	0.292558		134.547	1	0.377007	1.06458	1.03157	0.642847	2.32275		134.685	-1	0.843272	1.589	2.04099	0.193412	3.23941		134.539	1	0.700848	0.744858	NaN	2.14652	1.65743		134.473	-1	0.801264	0.962903	0.785599	1.5346	0.649933
135.024	-1	0.840908	0.466144	0.826159	2.23876	0.290525		135.047	1	0.341663	1.03092	1.01809	0.648417	2.36731		135.185	0	0.805959	1.59076	2.35567	0.249573	3.138		135.039	1	0.830857	0.748343	NaN	2.08525	1.67957		134.973	-1	0.792781	0.950849	0.777577	1.60402	0.624304
135.524	-1	0.976014	0.489229	0.812448	2.16413	0.28988		135.547	1	0.350425	0.984023	0.919581	0.681922	2.47995		135.685	0	0.766823	1.59482	2.67786	0.307844	3.0246		135.539	1	0.958981	0.753877	NaN	2.02734	1.7035		135.473	-1	0.787892	0.941732	0.768671	1.66582	0.598085
136.024	-1	1.10258	0.533355	0.799618	2.14562	0.295273		136.047	1	0.36883	0.934227	0.80248	0.721535	2.60747		136.185	1	0.757983	1.634	2.95766	0.363523	3.04027		136.039	1	1.06122	0.795559	NaN	2.01656	1.75471		135.973	-1	0.769459	0.926135	0.748119	1.68655	0.556137
136.524	-1	1.19729	0.560762	0.773468	2.12899	0.285312		136.547	1	0.364792	0.828762	0.97881	0.71295	2.58111		136.685	1	0.749277	1.66283	3.15592	0.415107	3.02794		136.539	1	1.14841	0.803363	NaN	1.98763	1.79535		136.473	-1	0.750927	0.911194	0.724788	1.68278	0.518174
137.024	-1	1.2473	0.564719	0.728633	2.11499	0.253813		137.047	1	0.355589	0.722738	1.1437	0.697615	2.55692		137.185	1	0.737672	1.64364	3.0123	0.449574	2.88177		137.039	1	1.20049	0.732039	NaN	1.9163	1.81129		136.973	-1	0.732167	0.897767	0.695051	1.6225	0.489408
137.524	-1	1.30505	0.559021	0.692393	2.09862	0.222061		137.547	1	0.323598	0.635716	1.11978	0.660108	2.60824		137.685	1	0.735473	1.61277	2.92324	0.490545	2.77013		137.539	0	1.19764	0.724883	NaN	1.84585	1.87139		137.473	-1	0.743317	0.882125	0.665233	1.56161	0.476054
138.024	-1	1.36686	0.548269	0.660653	2.08101	0.190175		138.047	1	0.286889	0.555198	1.12784	0.61574	2.63438		138.185	1	0.74715	1.5647	2.91468	0.541108	2.70941		138.039	0	1.14387	0.777195	NaN	1.7762	1.97243		137.973	-1	0.779682	0.864615	0.635348	1.50021	0.475692
138.524	-1	1.41462	0.520553	0.646678	2.06716	0.143156		138.547	1	0.241027	0.487296	1.19792	0.558062	2.6117		138.685	1	0.758563	1.50498	2.91563	0.64579	2.58558		138.539	-1	1.04518	0.890969	NaN	1.67433	2.06855		138.473	-1	0.836726	0.854696	0.62822	1.42316	0.47204
139.024	-1	1.45904	0.49215	0.636034	2.05115	0.0970146		139.047	1	0.215511	0.446528	1.18213	0.524201	2.6024		139.185	1	0.769815	1.43815	2.92237	0.78353	2.42321		139.039	-1	0.9308	1.02623	NaN	1.5612	2.16296		138.973	-1	0.904252	0.848625	0.632627	1.33818	0.46672
139.524	-1	1.48706	0.475979	0.637648	2.01014	0.0760759		139.547	1	0.213958	0.437716	1.06521	0.51839	2.60887		139.685	1	0.7642	1.4118	3.02614	0.907301	2.31007		139.539	-1	0.811569	1.08521	NaN	1.44627	2.23679		139.473	-1	0.985272	0.846062	0.65157	1.26672	0.478196
140.024	0	1.46684	0.457443	0.643589	1.98791	0.0502		140.047	1	0.213493	0.416361	1.03611	0.525047	2.57184		140.185	1	0.755572	1.39572	3.13527	1.02781	2.20654		140.039	-1	0.691544	1.13171	NaN	1.33105	2.30725		139.973	-1	1.06738	0.84588	0.675414	1.19665	0.485955
140.524	0	1.35007	0.434178	0.65819	2.00328	0.0144439		140.547	1	0.21354	0.389109	1.04831	0.537566	2.51436		140.685	1	0.748613	1.4162	3.07551	1.13952	2.10891		140.539	-1	0.616686	1.12269	NaN	1.19528	2.26358		140.473	-1	1.1469	0.859989	0.723069	1.1262	0.454353
141.024	1	1.23175	0.415115	0.667337	2.027	0.00751788		141.047	1	0.229876	0.391177	1.12143	0.547064	2.51526		141.185	1	0.730463	1.41747	3.00827	1.22119	2.01662		141.039	-1	0.559305	1.09632	NaN	1.0731	2.20544		140.973	-1	1.2427	0.87544	0.757968	1.09031	0.437072
141.524	1	1.11207	0.399689	0.671768	2.05792	0.0255292		141.547	1	0.246065	0.397701	1.1968	0.554749	2.50988		141.685	1	0.683738	1.36965	2.92192	1.22617	1.93798		141.539	-1	0.564347	1.00971	NaN	1.00857	2.10818		141.473	-1	1.36708	0.893248	0.770463	1.1151	0.444944
142.024	1	1.02114	0.391721	0.67908	2.10639	0.040456		142.047	1	0.24464	0.415108	1.23156	0.549093	2.38938		142.185	1	0.639763	1.32552	2.8521	1.2499	1.86056		142.039	-1	0.606198	1.00166	NaN	0.997639	2.02746		141.973	-1	1.50412	0.907035	0.770534	1.15291	0.448743
142.524	1	0.93949	0.386162	0.687323	2.16052	0.0543861		142.547	1	0.246062	0.433327	1.25029	0.541483	2.27605		142.685	1	0.599879	1.28687	2.80687	1.30152	1.78495		142.539	-1	0.698837	1.102	NaN	1.06065	1.96957		142.473	-1	1.6495	0.918175	0.762425	1.19931	0.44986
143.024	1	0.840419	0.363562	0.696667	2.20756	0.0645494		143.047	1	0.257604	0.454435	1.21207	0.526931	2.18819		143.185	1	0.591251	1.26204	2.83797	1.34583	1.74525		143.039	-1	0.771656	1.19685	NaN	1.12046	1.92632		142.973	-1	1.76943	0.911222	0.746577	1.25411	0.450055
143.524	1	0.742109	0.338059	0.705994	2.25345	0.0724249		143.547	1	0.261904	0.469497	1.15692	0.516582	2.07594		143.685	1	0.602555	1.24602	2.91777	1.38547	1.72846		143.539	-1	0.834275	1.28888	NaN	1.17862	1.89059		143.473	-1	1.87863	0.89664	0.727464	1.31246	0.449862
144.024	1	0.674239	0.30822	0.713683	2.29796	0.0639467		144.047	1	0.256993	0.476871	1.08023	0.51158	1.93268		144.185	1	0.601641	1.22386	2.93278	1.40105	1.65336		144.039	-1	0.85715	1.40093	NaN	1.23272	1.89134		143.973	-1	1.99644	0.877258	0.731862	1.41616	0.445984
144.524	1	0.60434	0.284177	0.71904	2.34224	0.0615373		144.547	1	0.260309	0.474317	0.967548	0.519827	1.85869		144.685	1	0.600513	1.20056	2.93458	1.4106	1.56586		144.539	-1	0.875512	1.5152	NaN	1.28628	1.89624		144.473	-1	2.08926	0.864304	0.734519	1.49951	0.436616
145.024	1	0.530036	0.272719	0.719331	2.38599	0.0723005		145.047	1	0.267846	0.466667	0.836396	0.534875	1.82026		145.185	1	0.639167	1.1785	2.9308	1.39778	1.46438		145.039	-1	0.870012	1.5781	NaN	1.25091	1.91812		144.973	-1	2.02706	0.892544	0.714814	1.43726	0.395994
145.524	1	0.478714	0.256848	0.712843	2.38837	0.074807		145.547	1	0.279233	0.495439	1.00057	0.595393	1.89731		145.685	1	0.66419	1.1479	2.89675	1.39279	1.36984		145.539	-1	0.876192	1.64346	NaN	1.23258	1.92865		145.473	-1	1.95337	0.921341	0.688093	1.37606	0.362922
146.024	1	0.447237	0.237166	0.700499	2.35501	0.0701831		146.047	1	0.288615	0.528411	1.19546	0.657929	1.9804		146.185	1	0.653239	1.09479	2.78287	1.40848	1.29366		146.039	-1	0.929092	1.71861	NaN	1.28242	1.89377		145.973	-1	1.85773	0.951201	0.647972	1.31687	0.344273
146.524	1	0.436471	0.246614	0.684921	2.32357	0.0580979		146.547	1	0.275165	0.554797	1.30677	0.683081	1.97688		146.685	1	0.662343	1.05883	2.69585	1.47875	1.25747		146.539	-1	0.982004	1.73836	NaN	1.33582	1.84831		146.473	-1	1.7069	0.976963	0.597393	1.20412	0.309462
147.024	1	0.43208	0.265029	0.668348	2.29273	0.0437157		147.047	1	0.278876	0.599286	1.43581	0.674236	1.98006		147.185	1	0.694428	1.04252	2.63961	1.61155	1.26712		147.039	-1	1.03493	1.68743	NaN	1.39378	1.78936		146.973	-1	1.51264	0.9995	0.538585	1.0492	0.261931
147.524	1	0.439354	0.244111	0.660385	2.26073	0.0205056		147.547	1	0.319121	0.682316	1.6026	0.593017	1.99749		147.685	1	0.721389	0.996425	2.36238	1.71207	1.27527		147.539	-1	1.07902	1.64972	NaN	1.45337	1.71203		147.473	-1	1.39971	0.987437	0.494657	1.03544	0.234942
148.024	1	0.469508	0.218848	0.658393	2.2351	-0.00202866		148.047	1	0.344131	0.792254	1.63145	0.50269	1.94223		148.185	1	0.746025	0.936802	1.98483	1.79794	1.28273		148.039	-1	1.11558	1.62324	NaN	1.51437	1.61908		147.973	-1	1.32528	0.958987	0.457776	1.08853	0.217683
148.524	1	0.557284	0.201624	0.668595	2.22771	-0.0181704		148.547	1	0.356152	0.925131	1.5427	0.404596	1.82499		148.685	1	0.75079	0.826309	1.54559	1.89421	1.25692		148.539	-1	1.10407	1.59559	NaN	1.53081	1.58316		148.473	-1	1.2391	0.935788	0.420013	1.13193	0.213758
149.024	1	0.626505	0.179683	0.67384	2.23195	-0.0256366		149.047	0	0.409157	1.09207	1.51036	0.319698	1.76731		149.185	1	0.760217	0.751516	1.11093	1.97142	1.22822		149.039	-1	1.07738	1.56757	NaN	1.53318	1.56526		148.973	-1	1.14958	0.914081	0.382	1.17257	0.213622
149.524	1	0.677364	0.153074	0.674178	2.2477	-0.0245169		149.547	0	0.485196	1.27814	1.50973	0.242215	1.74309		149.685	1	0.813839	0.949444	0.746963	1.91388	1.20174		149.539	-1	1.01496	1.60723	NaN	1.48623	1.5454		149.473	-1	1.08215	0.906523	0.341334	1.2302	0.221713
150.024	1	0.724111	0.13769	0.697991	2.2281	-0.0384597		150.047	-1	0.522369	1.43986	1.45572	0.256974	1.69089		150.185	1	0.879822	1.14614	0.511467	1.86668	1.2073		150.039	-1	0.949881	1.64307	NaN	1.4413	1.52267		149.973	-1	1.0164	0.901048	0.300603	1.27092	0.227529
150.524	1	0.769294	0.126577	0.730735	2.19506	-0.0581331		150.547	-1	0.558082	1.59122	1.40174	0.284422	1.63359		150.685	1	0.969044	1.34052	0.517515	1.8389	1.27311		150.539	-1	0.876071	1.65545	NaN	1.41	1.48718		150.473	-1	0.956561	0.903004	0.259642	1.25088	0.225139
151.024	1	0.675174	0.113123	0.74545	2.20671	-0.0205976		151.047	-1	0.650362	1.66823	1.44923	0.284823	1.56989		151.185	1	1.07732	1.561	0.669454	1.79271	1.25331		151.039	-1	0.819261	1.64558	NaN	1.37527	1.45133		150.973	-1	0.908867	0.904498	0.219305	1.22756	0.214025
151.524	1	0.580527	0.096541	0.760068	2.20311	0.0126328		151.547	-1	0.737485	1.74195	1.50389	0.281574	1.50899		151.685	1	1.20052	1.80193	0.93565	1.73211	1.16646		151.539	-1	0.787802	1.6025	NaN	1.33543	1.41495		151.473	-1	0.877969	0.905353	0.179832	1.19971	0.190844
152.024	1	0.525802	0.0647252	0.779702	2.1081	0.00642063		152.047	-1	0.801241	1.80078	1.59105	0.261781	1.46087		152.185	1	1.28668	1.84286	1.13456	1.74517	1.1029		152.039	-1	0.75673	1.56891	NaN	1.30735	1.39232		151.973	-1	0.845474	0.900245	0.157447	1.17447	0.177737
152.524	1	0.469116	0.0422653	0.809524	2.02058	0.000454678		152.547	-1	0.868731	1.87567	1.73325	0.25629	1.42077		152.685	1	1.36252	1.82891	1.31494	1.77846	1.04561		152.539	-1	0.725895	1.54109	NaN	1.28643	1.37809		152.473	-1	0.812079	0.891777	0.144692	1.15069	0.170305
153.024	1	0.407957	0.0411444	0.862583	1.95017	-0.00494977		153.047	-1	0.941821	1.97466	1.95797	0.27225	1.39269		153.185	1	1.32902	1.83984	1.45118	1.81181	0.909041		153.039	-1	0.714655	1.52352	NaN	1.25928	1.36554		152.973	-1	0.798505	0.890825	0.148106	1.1504	0.180918
153.524	1	0.40649	0.0414679	0.917194	1.86493	-0.0182543		153.547	-1	1.01393	2.05595	2.07569	0.292214	1.33892		153.685	1	1.30126	1.83146	1.55718	1.84735	0.806957		153.539	-1	0.704905	1.5045	NaN	1.22946	1.35315		153.473	-1	0.791218	0.892256	0.156649	1.15757	0.197253
154.024	1	0.459074	0.0430993	0.973211	1.76627	-0.0387124		154.047	-1	1.08543	2.1264	2.12793	0.314627	1.26942		154.185	1	1.29363	1.75525	1.557	1.89058	0.826017		154.039	-1	0.660622	1.43283	NaN	1.17632	1.33822		153.973	-1	0.829608	0.907051	0.184424	1.17367	0.224542
154.524	0	0.502845	0.0703102	1.0362	1.70797	-0.0259477		154.547	-1	1.28118	2.2306	2.29212	0.365894	1.15049		154.685	1	1.24814	1.67882	1.59583	1.93227	0.815303		154.539	-1	0.618915	1.3974	NaN	1.11512	1.32085		154.473	-1	0.879588	0.92367	0.219372	1.1833	0.252206
155.024	0	0.543241	0.107321	1.10186	1.66514	-0.000454678		155.047	-1	1.5251	2.34788	2.49972	0.428348	1.01238		155.185	1	1.15514	1.6021	1.68359	1.97204	0.767242		155.039	-1	0.583201	1.44629	NaN	1.03517	1.2978		154.973	-1	0.967327	0.945775	0.278361	1.1693	0.280392
155.524	-1	0.637296	0.128996	1.15581	1.58961	0.037945		155.547	-1	1.71046	2.40775	2.57698	0.435031	0.913602		155.685	1	1.08615	1.49357	1.73603	1.93854	0.750037		155.539	-1	0.538111	1.52143	NaN	0.952833	1.29266		155.473	-1	1.04304	0.961964	0.33856	1.14171	0.305745
156.024	-1	0.739224	0.15095	1.20199	1.52384	0.0733806		156.047	-1	1.87916	2.46634	2.66084	0.439349	0.82264		156.185	1	1.02975	1.36836	1.76995	1.86662	0.749012		156.039	-1	0.484345	1.62086	NaN	0.868282	1.3041		155.973	-1	1.09538	0.966659	0.401114	1.08769	0.325593
156.524	-1	0.860571	0.18231	1.20809	1.53233	0.0847498		156.547	-1	1.98004	2.53728	2.82245	0.449786	0.759558		156.685	1	0.967805	1.30257	1.64959	1.7962	0.650784		156.539	-1	0.445126	1.79604	NaN	0.80278	1.3172		156.473	-1	1.09658	0.964996	0.451708	1.02985	0.339077
157.024	-1	0.963591	0.207735	1.19957	1.53704	0.0916882		157.047	-1	2.02692	2.59277	2.91289	0.457401	0.718904		157.185	1	0.915468	1.24469	1.50382	1.72815	0.543835		157.039	-1	0.411526	2.00047	NaN	0.744636	1.33095		156.973	-1	1.05748	0.958322	0.492875	0.968995	0.347544
157.524	-1	1.0345	0.222767	1.16545	1.53511	0.0908645		157.547	-1	1.93577	2.60882	2.82145	0.4578	0.735581		157.685	1	0.981665	1.17443	1.33509	1.68435	0.505062		157.539	-1	0.406823	2.08093	NaN	0.730524	1.34577		157.473	-1	1.01683	0.944389	0.498349	0.922783	0.33384
158.024	-1	1.05743	0.254074	1.0976	1.57408	0.168666		158.047	-1	1.86914	2.6345	2.76762	0.477908	0.729336		158.185	1	1.05181	1.11297	1.17691	1.65044	0.459212		158.039	-1	0.405626	2.15175	NaN	0.721779	1.35401		157.973	-1	0.975741	0.928406	0.493745	0.880706	0.313875
158.524	-1	1.04619	0.296967	1.00575	1.64216	0.302428		158.547	-1	1.82695	2.66978	2.7513	0.517663	0.700242		158.685	1	1.13805	1.0874	1.06174	1.65678	0.384512		158.539	-1	0.431395	2.1918	NaN	0.754475	1.25777		158.473	-1	1.02123	0.919491	0.485567	0.852496	0.281809
159.024	-1	0.98976	0.322135	0.961148	1.64008	0.413308		159.047	-1	1.80018	2.70796	2.66286	0.552328	0.680748		159.185	1	1.2037	1.05763	1.0074	1.64373	0.37025		159.039	-1	0.452703	2.24944	NaN	0.788144	1.20249		158.973	-1	1.08871	0.911279	0.481855	0.827197	0.249667
159.524	-1	0.923885	0.342067	0.928748	1.62187	0.518518		159.547	-1	1.78001	2.74738	2.54351	0.584811	0.665367		159.685	1	1.2401	1.02188	1.03947	1.60316	0.441821		159.539	-1	0.463647	2.34791	NaN	0.824073	1.24235		159.473	-1	1.24372	0.902449	0.512709	0.811588	0.226573
160.024	-1	0.898191	0.328202	0.929749	1.61857	0.615302		160.047	-1	1.76267	2.81147	2.50362	0.607117	0.621782		160.185	1	1.25192	1.06093	1.05926	1.56185	0.489355		160.039	-1	0.470046	2.47023	NaN	0.858479	1.31676		159.973	-1	1.40177	0.895528	0.554457	0.779273	0.193906
160.524	-1	0.899363	0.284615	0.922502	1.54388	0.64855		160.547	-1	1.73999	2.87413	2.45317	0.622487	0.576955		160.685	1	1.24978	1.14249	1.07208	1.52011	0.523227		160.539	-1	0.471918	2.6163	NaN	0.891368	1.42557		160.473	-1	1.56514	0.891951	0.61529	0.717694	0.144469
161.024	-1	0.936119	0.20166	0.904331	1.37463	0.597646		161.047	-1	1.68296	2.91493	2.29532	0.600523	0.539461		161.185	1	1.2065	1.2219	1.00526	1.51441	0.569284		161.039	-1	0.483599	2.72471	NaN	0.900042	1.63421		160.973	-1	1.67808	0.888712	0.685379	0.652918	0.125417
161.524	-1	0.941542	0.144461	0.864025	1.25284	0.566316		161.547	-1	1.62303	2.95009	2.15072	0.583765	0.506594		161.685	1	1.14412	1.30032	0.90144	1.52545	0.621002		161.539	-1	0.499078	2.81854	NaN	0.899336	1.8815		161.473	-1	1.75783	0.885696	0.76156	0.586037	0.12637
162.024	-1	0.930138	0.101095	0.811832	1.15653	0.545497		162.047	-1	1.55747	2.97437	2.03175	0.577077	0.482677		162.185	1	1.11787	1.39182	0.821372	1.58185	0.634535		162.039	-1	0.570612	2.84511	NaN	0.891423	1.98213		161.973	-1	1.8959	0.892568	0.810477	0.511118	0.130733
162.524	-1	0.968655	0.111245	0.779427	1.0653	0.567309		162.547	-1	1.51456	2.97951	1.91131	0.570952	0.457996		162.685	1	1.09489	1.46288	0.739809	1.6345	0.648343		162.539	-1	0.659844	2.84604	NaN	0.880202	2.0626		162.473	-1	2.04649	0.901561	0.853545	0.434477	0.135827
163.024	-1	1.0213	0.137683	0.753348	0.977165	0.601659		163.047	-1	1.49092	2.96836	1.78962	0.565305	0.432664		163.185	1	1.06294	1.36588	0.624624	1.61614	0.699998		163.039	-1	0.813021	2.75035	NaN	0.856103	2.09378		162.973	-1	2.27551	0.910446	0.883095	0.404572	0.195681
163.524	-1	0.999543	0.190737	0.765491	1.03608	0.616298		163.547	-1	1.48577	2.95482	1.73754	0.57076	0.405903		163.685	1	1.04073	1.29995	0.594877	1.62866	0.741732		163.539	-1	0.993638	2.6235	NaN	0.823571	2.089		163.473	-1	2.52544	0.919312	0.909957	0.37873	0.251192
164.024	-1	0.982979	0.242163	0.780478	1.07978	0.633991		164.047	-1	1.48583	2.94061	1.70503	0.579331	0.378736		164.185	1	1.04896	1.33115	0.832166	1.73768	0.752461		164.039	-1	1.21541	2.44992	NaN	0.778389	2.03028		163.973	-1	2.85802	0.928112	0.927252	0.359213	0.267576
164.524	-1	1.00113	0.282721	0.814466	1.02182	0.67208		164.547	-1	1.5166	2.92879	1.6725	0.574454	0.342497		164.685	1	1.02003	1.3612	1.03597	1.80692	0.767167		164.539	-1	1.45929	2.22795	NaN	0.719443	1.97331		164.473	-1	3.14963	0.939227	0.969169	0.345033	0.280403
165.024	-1	0.9795	0.302475	0.836721	0.978575	0.688375		165.047	-1	1.54314	2.91826	1.64571	0.569633	0.31031		165.185	1	0.948382	1.38993	1.20127	1.83042	0.786447		165.039	-1	1.71792	1.97369	NaN	0.651312	1.9175		164.973	-1	3.37491	0.954091	1.05095	0.339492	0.28747
165.524	-1	0.88406	0.283629	0.837205	0.962616	0.66423		165.547	-1	1.53877	2.91711	1.6609	0.565225	0.307736		165.685	1	0.894877	1.43719	1.43781	1.88926	0.812502		165.539	-1	1.92214	1.78578	NaN	0.652635	1.87465		165.473	-1	3.47069	0.964909	1.13463	0.371194	0.274616
166.024	-1	0.801074	0.283633	0.830954	0.931367	0.726745		166.047	-1	1.53659	2.91634	1.66425	0.561463	0.30619		166.185	1	0.850466	1.49374	1.71004	1.96582	0.84195		166.039	-1	2.11442	1.61243	NaN	0.669182	1.83464		165.973	-1	3.48157	0.973075	1.21954	0.427313	0.248702
166.524	-1	0.727482	0.297857	0.819622	0.888582	0.854635		166.547	-1	1.54579	2.91761	1.60585	0.561076	0.310011		166.685	1	0.903636	1.47468	1.87363	1.97063	0.821795		166.539	-1	2.13764	1.62892	NaN	0.721275	1.95685		166.473	-1	3.37436	0.970514	1.2968	0.488314	0.236045
167.024	-1	0.675759	0.357729	0.797771	0.891971	0.961371		167.047	-1	1.55032	2.92008	1.56353	0.559867	0.317517		167.185	1	0.971816	1.45839	2.00881	1.97167	0.796046		167.039	-1	2.12459	1.66717	NaN	0.777897	2.08226		166.973	-1	3.22219	0.963867	1.37116	0.551175	0.228436
167.524	-1	0.629145	0.428267	0.773462	0.906148	1.06316		167.547	-1	1.53624	2.92736	1.58525	0.555382	0.339683		167.685	1	1.06642	1.53236	2.02471	2.00906	0.772503		167.539	-1	1.97802	1.75601	NaN	0.846364	2.17013		167.473	-1	2.9496	0.940164	1.38141	0.589783	0.232326
168.024	-1	0.707787	0.509097	0.771295	0.868605	1.27203		168.047	-1	1.52506	2.93555	1.57904	0.547306	0.35106		168.185	1	1.15781	1.63032	2.07508	2.03967	0.733615		168.039	0	1.81956	1.8429	NaN	0.896588	2.27169		167.973	-1	2.6801	0.918502	1.38581	0.616822	0.243597
168.524	-1	0.785194	0.587865	0.765476	0.825799	1.4686		168.547	-1	1.51756	2.94488	1.53741	0.534673	0.348748		168.685	1	1.24291	1.77507	2.19264	2.0571	0.664806		168.539	0	1.62727	1.92426	NaN	0.894889	2.41218		168.473	-1	2.45653	0.910508	1.38111	0.598683	0.284753
169.024	-1	0.810976	0.65285	0.733817	0.776208	1.56637		169.047	-1	1.53402	2.95342	1.52277	0.525805	0.341752		169.185	1	1.24484	1.9046	2.23394	2.02759	0.642888		169.039	1	1.46538	1.95058	NaN	0.888982	2.52895		168.973	-1	2.25285	0.905805	1.39753	0.595089	0.317129
169.524	-1	0.847115	0.69456	0.710783	0.731118	1.63926		169.547	-1	1.56284	2.96156	1.52207	0.518881	0.332339		169.685	1	1.18028	2.02196	2.2143	1.96059	0.658448		169.539	1	1.33658	1.91699	NaN	0.878493	2.61988		169.473	-1	2.08106	0.90638	1.4478	0.614808	0.335431
170.024	-1	0.899454	0.699867	0.701238	0.693068	1.67324		170.047	-1	1.59932	2.96514	1.53454	0.513081	0.317969		170.185	1	1.23733	2.06679	2.34888	1.92394	0.642678		170.039	1	1.26354	1.88101	NaN	0.8604	2.75731		169.973	-1	1.92441	0.902612	1.47179	0.676045	0.353373
170.524	-1	0.974344	0.704448	0.69421	0.656698	1.70219		170.547	-1	1.64644	2.96242	1.56531	0.508842	0.29672		170.685	1	1.32777	2.09109	2.52472	1.89572	0.618866		170.539	1	1.21206	1.84411	NaN	0.839369	2.91272		170.473	-1	1.77688	0.896231	1.47995	0.762277	0.371098
171.024	-1	1.06245	0.708603	0.688657	0.621315	1.72818		171.047	0	1.72165	2.9575	1.57073	0.466132	0.265793		171.185	1	1.38515	2.06766	2.53809	1.86955	0.66555		171.039	1	1.18704	1.78779	NaN	0.796182	3.01424		170.973	-1	1.66745	0.883275	1.47566	0.897281	0.367141
171.524	0	1.19569	0.713991	0.68934	0.587812	1.74628		171.547	0	1.8227	2.95057	1.55281	0.388026	0.22596		171.685	1	1.44812	2.05533	2.5495	1.85347	0.70772		171.539	1	1.16396	1.73297	NaN	0.751283	3.11097		171.473	-1	1.57121	0.868046	1.46707	1.04915	0.355683
172.024	0	1.33692	0.719597	0.691129	0.554642	1.76299		172.047	1	1.91255	2.93183	1.65114	0.302624	0.210147		172.185	1	1.53041	2.08131	2.55413	1.87218	0.734306		172.039	1	1.15402	1.71467	NaN	0.69394	3.16744		171.973	-1	1.47667	0.863245	1.40114	1.18284	0.343603
172.524	1	1.46475	0.746053	0.689827	0.497992	1.82738		172.547	1	1.99845	2.90895	1.79032	0.214659	0.202773		172.685	1	1.54612	2.11623	2.51891	1.87466	0.795163		172.539	1	1.14352	1.6835	NaN	0.636602	3.21685		172.473	-1	1.40979	0.860642	1.34306	1.30708	0.330052
173.024	1	1.56552	0.770726	0.684801	0.440801	1.8919		173.047	1	2.08722	2.84872	1.80794	0.146728	0.209016		173.185	1	1.47315	2.16304	2.43058	1.85551	0.901672		173.039	1	1.13159	1.61938	NaN	0.57928	3.24816		172.973	-1	1.46661	0.867089	1.32437	1.39039	0.309964
173.524	1	1.53646	0.781109	0.662222	0.38714	1.9444		173.547	1	2.17452	2.79021	1.82735	0.0842498	0.215478		173.685	1	1.43738	2.19736	2.50682	1.99445	0.876441		173.539	1	1.08539	1.56926	NaN	0.545785	3.26156		173.473	-1	1.54163	0.879311	1.3228	1.45296	0.295381
174.024	1	1.50462	0.783833	0.662248	0.348377	2.0284		174.047	1	2.23703	2.78297	1.95448	0.0940564	0.216454		174.185	1	1.42222	2.22476	2.67428	2.22102	0.778193		174.039	1	1.00506	1.53306	NaN	0.536023	3.2571		173.973	-1	1.64344	0.900032	1.34642	1.485	0.288902
174.524	1	1.46839	0.77449	0.697896	0.333094	2.16202		174.547	1	2.2818	2.79223	2.04026	0.102861	0.217327		174.685	1	1.52772	2.1234	2.88477	2.18393	0.78798		174.539	1	0.920894	1.47564	NaN	0.522063	3.22657		174.473	0	1.76948	0.915198	1.38065	1.50934	0.31454
175.024	1	1.3901	0.742897	0.70908	0.322116	2.27833		175.047	1	2.27614	2.84838	2.00848	0.108815	0.217912		175.185	1	1.65103	1.99785	3.08882	2.1139	0.814961		175.039	1	0.836234	1.41346	NaN	0.507499	3.19109		174.973	0	1.9176	0.925302	1.42457	1.52666	0.369446
175.524	1	1.28487	0.697057	0.704597	0.313896	2.38355		175.547	1	2.25135	2.92087	2.03706	0.102214	0.211855		175.685	1	1.76568	1.81989	3.13775	2.13386	0.848998		175.539	1	0.774397	1.37655	NaN	0.514618	3.23184		175.473	1	2.01692	0.932692	1.44866	1.53037	0.444507
176.024	1	1.17195	0.681897	0.719403	0.297883	2.53082		176.047	1	2.20592	3.011	2.13077	0.0820671	0.198632		176.185	1	1.87646	1.69857	3.06173	2.06846	0.906905		176.039	1	0.714776	1.3433	NaN	0.522204	3.27356		175.973	1	2.09911	0.93913	1.46578	1.52931	0.526641
176.524	1	1.05727	0.672674	0.736861	0.279706	2.6836		176.547	0	2.10707	3.09227	2.20557	0.0578783	0.210645		176.685	1	1.9784	1.70651	2.70042	1.80818	1.01931		176.539	1	0.663951	1.32455	NaN	0.531645	3.31912		176.473	1	2.10467	0.930116	1.45262	1.50647	0.640911
177.024	1	0.935125	0.650477	0.703654	0.239011	2.71525		177.047	0	1.97268	3.16766	2.26779	0.0309997	0.239455		177.185	1	1.92987	1.74819	2.52449	1.80085	1.08732		177.039	1	0.617194	1.30067	NaN	0.5515	3.36135		176.973	1	2.09508	0.919147	1.43281	1.47678	0.760676
177.524	1	0.812983	0.62828	0.670446	0.198317	2.7469		177.547	-1	1.85564	3.16479	2.299	0.0131982	0.264908		177.685	1	1.74983	1.81934	2.51058	2.01462	1.11653		177.539	1	0.576007	1.26977	NaN	0.585618	3.399		177.473	1	2.06281	0.913482	1.39809	1.41772	0.882277
178.024	1	0.685583	0.643763	0.695119	0.165591	2.86661		178.047	-1	1.74263	3.14657	2.31885	-0.00239402	0.289757		178.185	1	1.62535	1.90358	2.56281	2.1314	1.13898		178.039	1	0.530833	1.24317	NaN	0.626144	3.41341		177.973	1	2.03361	0.903963	1.36637	1.36405	1.00689
178.524	1	0.559596	0.656119	0.71913	0.132923	2.97713		178.547	-1	1.63557	3.17085	2.22763	-0.0125325	0.317751		178.685	1	1.51942	1.99218	2.63714	2.21579	1.15917		178.539	1	0.482276	1.22022	NaN	0.67211	3.40809		178.473	1	2.0104	0.886955	1.34048	1.32085	1.13736
179.024	1	0.451004	0.619361	0.712404	0.0976386	2.9526		179.047	-1	1.54089	3.18463	2.14279	-0.0220299	0.346109		179.185	1	1.37273	1.85637	2.91791	2.13373	1.24047		179.039	1	0.468968	1.20061	NaN	0.695259	3.42681		178.973	1	1.97708	0.868034	1.31493	1.28477	1.26724
179.524	1	0.358537	0.59072	0.711212	0.0699487	2.94409		179.547	-1	1.48134	3.16858	2.07604	-0.0297064	0.375496		179.685	1	1.33352	1.74241	3.10488	1.98023	1.29944		179.539	1	0.465521	1.18193	NaN	0.712024	3.45225		179.473	1	1.93578	0.847607	1.28963	1.2543	1.39666
180.024	1	0.299591	0.57895	0.721527	0.0580454	2.96889		180.047	-1	1.42179	3.17196	2.04837	-0.0359421	0.39286		180.185	1	1.44242	1.66916	3.15422	1.73775	1.32506		180.039	1	0.507039	1.17178	NaN	0.756912	3.46466		179.973	1	1.86367	0.822521	1.25979	1.22351	1.49806
180.524	1	0.281799	0.550574	0.722597	0.0505796	2.94592		180.547	-1	1.36223	3.19629	2.06281	-0.0406245	0.39726		180.685	1	1.54268	1.5981	3.24847	1.52871	1.32997		180.539	1	0.55088	1.16286	NaN	0.799813	3.47887		180.473	1	1.78282	0.796114	1.22866	1.19263	1.59151
181.024	1	0.298502	0.508277	0.715917	0.0468334	2.88289		181.047	-1	1.31608	3.19228	2.09657	-0.047829	0.399906		181.185	1	1.63796	1.52831	3.36866	1.33898	1.32291		181.039	1	0.608005	1.16368	NaN	0.820143	3.51139		180.973	1	1.64777	0.777739	1.18734	1.16205	1.67494
181.524	1	0.331052	0.496705	0.711752	0.0635341	2.85644		181.547	-1	1.27894	3.16923	2.14331	-0.0567276	0.401373		181.685	1	1.70209	1.52895	3.52588	1.3186	1.32238		181.539	1	0.658787	1.16449	NaN	0.832394	3.52045		181.473	1	1.50948	0.759219	1.14488	1.13044	1.75445
182.024	1	0.367957	0.493578	0.708278	0.0858548	2.84005		182.047	-1	1.24355	3.1384	2.13799	-0.0537384	0.402714		182.185	1	1.75712	1.54363	3.68321	1.3292	1.32507		182.039	1	0.696166	1.16528	NaN	0.827574	3.47993		181.973	1	1.3884	0.734285	1.10235	1.09216	1.81662
182.524	1	0.392322	0.495666	0.691769	0.098784	3.00249		182.547	-1	1.20857	3.10562	2.11974	-0.0477845	0.404039		182.685	1	1.72285	1.5926	3.67122	1.34974	1.38055		182.539	1	0.700472	1.13143	NaN	0.81518	3.41098		182.473	1	1.27148	0.711524	1.06359	1.05889	1.88243
183.024	1	0.411123	0.49812	0.672632	0.109523	3.18963		183.047	-1	1.13211	3.08462	2.24451	-0.0414325	0.445711		183.185	1	1.69563	1.63727	3.66031	1.35902	1.42749		183.039	1	0.676787	1.06826	NaN	0.796375	3.31796		182.973	1	1.16137	0.692311	1.03096	1.0338	1.95418
183.524	1	0.402483	0.498338	0.647109	0.113578	3.3848		183.547	-1	1.04959	3.0704	2.35621	-0.0317296	0.488486		183.685	1	1.68919	1.66925	3.65261	1.33507	1.44918		183.539	1	0.631064	0.960994	NaN	0.805857	3.21021		183.473	1	1.07345	0.669773	1.01276	0.909673	2.0108
184.024	1	0.39341	0.496721	0.623667	0.107624	3.5752		184.047	-1	0.922467	3.10599	2.37186	0.00259352	0.539363		184.185	1	1.68642	1.70367	3.62394	1.30565	1.4952		184.039	1	0.578441	0.839931	NaN	0.824193	3.09783		183.973	1	0.995037	0.645809	1.00074	0.743052	2.06091
184.524	1	0.383584	0.491915	0.603841	0.0842715	3.75731		184.547	0	0.800804	3.1427	2.34609	0.0358288	0.592111		184.685	1	1.68767	1.74075	3.57232	1.27025	1.56784		184.539	1	0.556887	0.767456	NaN	0.855965	2.96703		184.473	1	0.930835	0.63098	0.99252	0.696749	2.12334
185.024	1	0.39871	0.491705	0.597416	0.07888	3.79243		185.047	0	0.690723	3.18176	2.23238	0.0667546	0.648831		185.185	1	1.70964	1.75444	3.47679	1.22397	1.61789		185.039	1	0.535735	0.710586	NaN	0.88694	2.85179		184.973	1	0.884746	0.615975	0.98646	0.665283	2.1801
185.524	1	0.431639	0.494774	0.600554	0.0863039	3.72267		185.547	1	0.612886	3.23057	2.0483	0.0911245	0.688464		185.685	1	1.73981	1.75886	3.36386	1.17336	1.65899		185.539	1	0.51384	0.712085	NaN	0.913733	2.79975		185.473	1	0.929264	0.596967	0.990496	0.671509	2.20285
186.024	1	0.433269	0.494692	0.599497	0.0908225	3.63184		186.047	1	0.572749	3.29076	1.78195	0.107829	0.70812		186.185	1	1.75206	1.76099	3.30264	1.18318	1.6983		186.039	1	0.487539	0.739472	NaN	0.94385	2.74174		185.973	1	0.942111	0.562906	0.99396	0.701576	2.17983
186.524	1	0.427933	0.493679	0.597438	0.0948413	3.53713		186.547	1	0.568539	3.30745	1.6047	0.120029	0.783691		186.685	1	1.75646	1.74872	3.23434	1.19543	1.73881		186.539	1	0.455176	0.80246	NaN	0.978536	2.6755		186.473	1	0.903241	0.504263	0.99649	0.770573	2.08208
187.024	1	0.418238	0.488909	0.593785	0.10059	3.45133		187.047	1	0.581222	3.3037	1.46933	0.130111	0.885551		187.185	1	1.70771	1.6199	3.07589	1.19023	1.79019		187.039	1	0.385265	0.920163	NaN	1.06857	2.60817		186.973	0	0.887886	0.477012	0.996695	0.847336	2.05582
187.524	1	0.412619	0.480262	0.594423	0.104454	3.37735		187.547	1	0.647268	3.25803	1.51684	0.151452	0.986915		187.685	0	1.63984	1.48083	2.96928	1.1706	1.84055		187.539	1	0.294269	1.06859	NaN	1.18967	2.54023		187.473	0	0.888208	0.470687	0.99535	0.929275	2.07723
188.024	1	0.422823	0.45656	0.611726	0.101004	3.34924		188.047	1	0.721228	3.20499	1.58561	0.172593	1.09042		188.185	0	1.5574	1.33395	2.90217	1.14	1.89013		188.039	1	0.22266	1.1774	NaN	1.33076	2.43807		187.973	-1	0.751072	0.500792	1.04944	0.870239	2.03516
188.524	1	0.429011	0.426642	0.626937	0.11981	3.29862		188.547	1	0.801551	3.13649	1.62341	0.178236	1.21378		188.685	-1	1.54314	1.18354	2.85591	1.10725	1.89721		188.539	1	0.154705	1.27874	NaN	1.47561	2.32945		188.473	-1	0.583843	0.538872	1.11567	0.78034	1.9792
189.024	1	0.430185	0.388965	0.639536	0.166396	3.21989		189.047	1	0.873082	3.07328	1.65448	0.177587	1.33747		189.185	-1	1.54803	1.03429	2.81553	1.0745	1.89226		189.039	1	0.0924788	1.38224	NaN	1.63462	2.18446		188.973	-1	0.654302	0.654434	1.17456	0.720266	1.9811
189.524	1	0.413293	0.354654	0.636551	0.216518	3.16501		189.547	1	0.913547	3.02875	1.6618	0.154709	1.46234		189.685	-1	1.63341	1.02292	2.80139	1.07895	1.83115		189.539	0	0.0384296	1.42683	NaN	1.78597	2.05554		189.473	-1	0.742853	0.753044	1.23129	0.638811	1.96289
190.024	1	0.3873	0.322038	0.625715	0.26842	3.12215		190.047	1	0.907183	3.01007	1.63669	0.120962	1.5829		190.185	-1	1.727	1.00973	2.79779	1.08746	1.75942		190.039	0	0.0127552	1.26382	NaN	1.90934	1.98584		189.973	-1	0.845645	0.735984	1.27918	0.434602	1.81903
190.524	1	0.318675	0.328357	0.574892	0.327551	3.16569		190.547	1	0.841412	3.02418	1.57043	0.0734251	1.69802		190.685	-1	1.84608	0.99084	2.82696	1.10859	1.65473		190.539	-1	-0.00886346	1.12667	NaN	2.02622	1.92305		190.473	-1	0.982209	0.710478	1.30472	0.266933	1.69479
191.024	1	0.249285	0.340983	0.533832	0.380585	3.23107		191.047	1	0.741273	3.00397	1.47474	0.0551174	1.83426		191.185	-1	1.90513	1.01494	2.85714	1.1237	1.57006		191.039	-1	-0.0253369	1.02232	NaN	2.13489	1.86902		190.973	-1	1.21371	0.661229	1.26743	0.201976	1.6257
191.524	1	0.205484	0.368919	0.589072	0.386316	3.38462		191.547	1	0.623478	2.96612	1.36395	0.051827	1.98134		191.685	-1	1.90118	1.08414	2.88838	1.13247	1.50639		191.539	-1	-0.0259848	0.915338	NaN	2.25902	1.82386		191.473	-1	1.39688	0.5962	1.23049	0.168	1.58143
192.024	0	0.195017	0.38408	0.650315	0.392358	3.41938		192.047	1	0.522382	2.89924	1.24046	0.0605785	2.06721		192.185	-1	1.88157	1.10872	2.92923	1.13247	1.44139		192.039	-1	-0.016999	0.806744	NaN	2.39257	1.78411		191.973	-1	1.52849	0.514334	1.19393	0.167078	1.56364
192.524	0	0.216939	0.386829	0.71739	0.3987	3.33871		192.547	1	0.432382	2.82355	1.11572	0.0725262	2.14251		192.685	-1	1.85564	1.11532	2.97396	1.12893	1.37585		192.539	-1	-0.0110605	0.8211	NaN	2.55146	1.72121		192.473	-1	1.56738	0.499539	1.16955	0.227224	1.56898
193.024	-1	0.229016	0.352771	0.802099	0.394191	3.17853		193.047	1	0.420625	2.70508	0.995321	0.0981118	2.19917		193.185	-1	1.80227	1.17877	2.97611	1.13688	1.31652		193.039	-1	-0.00563378	0.857446	NaN	2.71479	1.65433		192.973	-1	1.56714	0.513053	1.15032	0.313145	1.58408
193.524	-1	0.235208	0.296703	0.897353	0.383194	2.9708		193.547	1	0.414331	2.58853	0.897505	0.117614	2.24476		193.685	-1	1.74307	1.23136	2.97058	1.14187	1.2672		193.539	-1	0.000824258	0.872852	NaN	2.87238	1.59406		193.473	-1	1.60372	0.59466	1.20523	0.324027	1.63433
194.024	-1	0.268784	0.256829	0.925279	0.447069	2.78852		194.047	1	0.418593	2.4757	0.843328	0.12536	2.26896		194.185	-1	1.66326	1.1978	2.94072	1.12509	1.27146		194.039	-1	0.0056182	0.885181	NaN	3.02033	1.53171		193.973	-1	1.63516	0.681063	1.26381	0.330555	1.67623
194.524	-1	0.308065	0.220329	0.939179	0.526541	2.61154		194.547	1	0.422621	2.3786	0.822585	0.133384	2.28125		194.685	-1	1.59274	1.16915	2.92034	1.10579	1.26883		194.539	-1	0.00655502	0.890379	NaN	3.14593	1.46452		194.473	-1	1.61737	0.762438	1.3076	0.348199	1.65058
195.024	-1	0.29448	0.207344	0.954131	0.6203	2.56213		195.047	1	0.42645	2.29484	0.830233	0.141644	2.28343		195.185	-1	1.53753	1.14858	2.9156	1.08236	1.25486		195.039	-1	0.0113099	0.892217	NaN	3.23806	1.39564		194.973	-1	1.60633	0.84341	1.35516	0.361168	1.62209
195.524	-1	0.303771	0.197969	0.976189	0.714896	2.51558		195.547	1	0.405844	2.23309	0.805548	0.146591	2.32194		195.685	-1	1.49748	1.1392	2.88368	1.04908	1.24916		195.539	-1	0.0195721	0.890969	NaN	3.29947	1.3252		195.473	-1	1.66916	0.919975	1.44395	0.323022	1.56275
196.024	-1	0.407581	0.199303	1.0253	0.810804	2.46309		196.047	1	0.372491	2.18282	0.763998	0.14981	2.37939		196.185	-1	1.46771	1.13742	2.83334	1.00911	1.24908		196.039	-1	0.0368164	0.886503	NaN	3.34723	1.26302		195.973	-1	1.7337	0.974573	1.49698	0.316058	1.48475
196.524	-1	0.522494	0.195419	1.06395	0.856124	2.3936		196.547	1	0.372266	2.14942	0.645236	0.162604	2.40349		196.685	-1	1.44917	1.12654	2.75726	0.960724	1.2373		196.539	-1	0.0572263	0.880902	NaN	3.39018	1.20374		196.473	-1	1.80218	0.978879	1.46813	0.380483	1.36402
197.024	-1	0.652553	0.18442	1.08835	0.832438	2.3009		197.047	1	0.377294	2.11624	0.52481	0.174671	2.42063		197.185	-1	1.43195	1.11333	2.67408	0.911865	1.22316		197.039	-1	0.0601021	0.918323	NaN	3.42059	1.13459		196.973	-1	1.80187	0.977475	1.45809	0.409097	1.2685
197.524	-1	0.867567	0.180786	1.11196	0.80464	2.21715		197.547	1	0.388125	2.06814	0.468002	0.172041	2.41969		197.685	-1	1.38644	1.0942	2.56208	0.895817	1.21589		197.539	-1	0.059149	0.957625	NaN	3.44864	1.06527		197.473	-1	1.73909	0.970882	1.46514	0.405179	1.19586
198.024	-1	1.15944	0.183818	1.13484	0.773123	2.14148		198.047	1	0.400311	2.01129	0.432681	0.200466	2.40546		198.185	-1	1.33852	1.06643	2.44778	0.878515	1.20953		198.039	-1	0.0524369	0.926039	NaN	3.47677	1.01508		197.973	-1	1.64508	0.972049	1.42967	0.409342	1.11927
198.524	-1	1.32099	0.201616	1.13879	0.757947	2.10813		198.547	1	0.415107	1.93758	0.438737	0.288695	2.36561		198.685	-1	1.28397	1.01484	2.32713	0.857767	1.2057		198.539	-1	0.0390951	0.907568	NaN	3.50338	0.965177		198.473	-1	1.53229	0.977884	1.36863	0.418366	1.0403
199.024	-1	1.43844	0.224411	1.13633	0.748301	2.08909		199.047	1	0.40818	1.86656	0.626885	0.379461	2.32827		199.185	-1	1.2257	0.994364	2.19293	0.843594	1.18665		199.039	-1	0.010328	0.919613	NaN	3.52646	0.915911		198.973	-1	1.3412	0.983493	1.32872	0.402438	0.990719
199.524	-1	1.55758	0.246902	1.157	0.761361	2.01105		199.547	1	0.384239	1.79764	0.957641	0.472214	2.29291		199.685	-1	1.16104	1.0274	2.03541	0.840733	1.1414		199.539	-1	-0.000791934	0.907286	NaN	3.54023	0.884523		199.473	-1	1.14476	0.989363	1.29175	0.384278	0.948422
200.024	-1	1.66565	0.268973	1.17981	0.777897	1.93313		200.047	1	0.362416	1.74202	1.17405	0.585768	2.26734		200.185	-1	1.10507	1.02574	1.90062	0.830057	1.09638		200.039	-1	0.00566489	0.870685	NaN	3.54472	0.870943		199.973	-1	1.08378	0.999706	1.24044	0.401382	0.933517
200.524	-1	1.61671	0.285288	1.22159	0.832389	1.88564		200.547	1	0.34054	1.68611	1.38533	0.694478	2.23977		200.685	-1	1.05535	0.999123	1.78217	0.813764	1.05153		200.539	-1	0.0106109	0.894928	NaN	3.44657	0.858532		200.473	-1	1.03748	1.0123	1.19703	0.419404	0.922805
201.024	-1	1.58317	0.29759	1.25585	0.878938	1.83041		201.047	1	0.317072	1.62066	1.5908	0.737985	2.18467		201.185	-1	0.984462	0.980819	1.75385	0.808032	1.00013		201.039	-1	0.0147012	0.953634	NaN	3.29029	0.846785		200.973	-1	1.03262	1.03126	1.17588	0.440014	0.923917
201.524	-1	1.6023	0.296161	1.26436	0.89831	1.74874		201.547	1	0.296509	1.56527	1.73737	0.796342	2.12115		201.685	-1	0.911049	0.958592	1.74092	0.803333	0.947246		201.539	-1	0.0547162	1.03969	NaN	3.16022	0.858682		201.473	-1	1.08102	1.0434	1.15251	0.4509	0.906173
202.024	-1	1.61379	0.294368	1.27254	0.928051	1.68542		202.047	1	0.282716	1.53332	1.74663	0.889317	2.03801		202.185	-1	0.840063	0.888135	1.76206	0.795225	0.888344		202.039	-1	0.100264	1.11852	NaN	3.03314	0.874258		201.973	-1	1.18617	1.04827	1.12677	0.451429	0.868343
202.524	-1	1.61084	0.291885	1.28006	0.977353	1.65674		202.547	1	0.276624	1.5084	1.69933	0.967855	1.95575		202.685	-1	0.772253	0.844203	1.78461	0.789709	0.833965		202.539	-1	0.142887	1.06498	NaN	2.89207	0.888327		202.473	-1	1.29119	1.05426	1.13206	0.493927	0.841432
203.024	-1	1.62605	0.27886	1.28563	1.01554	1.62042		203.047	1	0.274392	1.48676	1.62712	1.04011	1.87372		203.185	-1	0.710924	0.854421	1.81004	0.789485	0.788818		203.039	-1	0.183574	1.0064	NaN	2.76609	0.912773		202.973	-1	1.39612	1.06098	1.15774	0.564011	0.821698
203.524	-1	1.65407	0.258398	1.28983	1.04589	1.57871		203.547	1	0.300226	1.47864	1.51793	1.10662	1.78405		203.685	-1	0.665327	0.852177	1.80095	0.793174	0.753695		203.539	-1	0.202356	0.890766	NaN	2.81093	1.05465		203.473	-1	1.53086	1.06249	1.22885	0.645491	0.772204
204.024	-1	1.70117	0.250233	1.30206	1.00036	1.51262		204.047	1	0.36095	1.45356	1.41434	1.15178	1.70441		204.185	-1	0.633056	0.839377	1.76263	0.800178	0.727062		204.039	-1	0.194511	0.746158	NaN	2.85174	1.17295		203.973	-1	1.67122	1.06302	1.30852	0.729116	0.717107
204.524	-1	1.74758	0.244435	1.31681	0.945339	1.44484		204.547	1	0.456647	1.41149	1.31636	1.17554	1.63483		204.685	-1	0.628432	0.832883	1.71559	0.810313	0.724137		204.539	-1	0.157794	0.570139	NaN	2.88816	1.26569		204.473	-1	1.68681	1.06496	1.4277	0.852719	0.716707
205.024	-1	1.69741	0.234454	1.34896	1.02209	1.44784		205.047	1	0.511293	1.36636	1.29934	1.23648	1.59274		205.185	-1	0.636553	0.827167	1.66779	0.821159	0.725996		205.039	-1	0.10496	0.573461	NaN	2.97382	1.34588		204.973	-1	1.69756	1.06625	1.54166	0.962315	0.719365
205.524	-1	1.65816	0.22354	1.38023	1.10701	1.45178		205.547	1	0.57415	1.31511	1.29508	1.29801	1.54782		205.685	-1	0.709901	0.797213	1.65916	0.82595	0.670844		205.539	-1	0.0590964	0.598272	NaN	3.05909	1.41064		205.473	-1	1.70841	1.06472	1.62871	1.01002	0.725688
206.024	-1	1.68243	0.207191	1.40641	1.2395	1.46118		206.047	1	0.672123	1.24923	1.29566	1.34826	1.48625		206.185	-1	0.757628	0.754405	1.65569	0.828704	0.616065		206.039	-1	0.0764761	0.637622	NaN	3.10268	1.37339		205.973	-1	1.69287	1.0594	1.68904	1.06129	0.740359
206.524	-1	1.66433	0.190863	1.44142	1.30529	1.50608		206.547	1	0.757647	1.16756	1.27973	1.41169	1.43295		206.685	-1	0.782467	0.700117	1.65681	0.829639	0.561619		206.539	-1	0.144704	0.671368	NaN	3.1183	1.34571		206.473	-1	1.64407	1.04927	1.71569	1.11707	0.76556
207.024	-1	1.57916	0.174568	1.49038	1.26551	1.60715		207.047	1	0.833722	1.0897	1.25839	1.46886	1.38382		207.185	-1	0.79478	0.689893	1.62756	0.829651	0.50046		207.039	-1	0.255935	0.700374	NaN	3.11027	1.32612		206.973	-1	1.60587	1.04596	1.73407	1.15778	0.769523
207.524	-1	1.51498	0.164154	1.47777	1.10908	1.63503		207.547	1	0.890861	1.05994	1.2444	1.47192	1.33768		207.685	-1	0.804469	0.688899	1.59194	0.829469	0.437895		207.539	-1	0.413026	0.696786	NaN	3.09979	1.3024		207.473	-1	1.5731	1.04611	1.74824	1.1908	0.762643
208.024	-1	1.46338	0.157266	1.42823	0.882711	1.61903		208.047	1	0.916713	1.04411	1.22901	1.4938	1.29126		208.185	-1	0.810631	0.734319	1.53619	0.863019	0.473009		208.039	-1	0.584457	0.683006	NaN	3.08855	1.27739		207.973	-1	1.5176	1.05894	1.73911	1.27881	0.756684
208.524	-1	1.39441	0.177539	1.34531	0.516167	1.57089		208.547	1	0.895715	1.04913	1.21154	1.54387	1.24444		208.685	-1	0.833852	0.775931	1.40563	0.859528	0.504011		208.539	0	0.737489	0.632058	NaN	3.05502	1.24855		208.473	-1	1.46275	1.07387	1.72588	1.37164	0.752903
209.024	-1	1.32844	0.202638	1.25641	0.151856	1.51201		209.047	1	0.841859	1.05756	1.21413	1.60981	1.17898		209.185	-1	0.875779	0.812549	1.19368	0.814947	0.528759		209.039	1	0.854169	0.574932	NaN	3.0377	1.21711		208.973	-1	1.43589	1.09505	1.69919	1.45346	0.767521
209.524	-1	1.35196	0.225279	1.16976	0.191992	1.38362		209.547	1	0.773103	1.06098	1.22574	1.68672	1.1009		209.685	-1	0.97436	0.724345	1.06629	0.750465	0.590606		209.539	1	0.867977	0.520425	NaN	3.08422	1.17973		209.473	-1	1.40895	1.11314	1.66843	1.53329	0.781335
210.024	-1	1.37807	0.248146	1.09514	0.24638	1.26765		210.047	1	0.741964	1.01286	1.21376	1.77279	1.01404		210.185	-1	1.0591	0.589665	0.980252	0.684547	0.628973		210.039	1	0.840979	0.488574	NaN	3.11344	1.14691		209.973	-1	1.3817	1.12039	1.62342	1.60614	0.792327
210.524	-1	1.41557	0.272007	1.07344	0.36347	1.20628		210.547	1	0.723865	0.954042	1.19968	1.8527	0.929815		210.685	0	1.1214	0.399137	0.945542	0.617894	0.632944		210.539	1	0.766461	0.483108	NaN	3.12251	1.11939		210.473	-1	1.35785	1.11996	1.58797	1.65905	0.789439
211.024	-1	1.45174	0.285048	1.07131	0.511643	1.15422		211.047	1	0.722336	0.881614	1.18295	1.92476	0.848937		211.185	0	1.14059	0.220944	0.990872	0.609573	0.638988		211.039	1	0.700585	0.497067	NaN	3.14631	1.09154		210.973	-1	1.33827	1.1098	1.56461	1.68675	0.769
211.524	-1	1.48611	0.283475	1.09561	0.701802	1.11474		211.547	1	0.756644	0.845081	1.13858	1.93178	0.791054		211.685	1	1.13337	0.0513621	1.07981	0.634862	0.645063		211.539	1	0.640941	0.525035	NaN	3.18072	1.06344		211.473	-1	1.31791	1.09975	1.55221	1.67343	0.764548
212.024	-1	1.54059	0.275819	1.14089	0.800632	1.09732		212.047	1	0.789416	0.824376	1.10324	1.92164	0.718882		212.185	1	1.01799	-0.0432021	1.14374	0.718257	0.604616		212.039	1	0.646203	0.54311	NaN	3.16684	1.05533		211.973	-1	1.29715	1.08975	1.54538	1.63917	0.768258
212.524	-1	1.60626	0.26478	1.19783	0.848668	1.09217		212.547	1	0.815303	0.822761	1.08494	1.89414	0.622385		212.685	1	0.894188	-0.114691	1.16926	0.79659	0.559047		212.539	1	0.665557	0.559037	NaN	3.14246	1.05156		212.473	-1	1.33256	1.07765	1.53508	1.61208	0.787817
213.024	-1	1.65982	0.256434	1.23566	0.884303	1.08936		213.047	1	0.870154	0.882432	1.11798	1.88617	0.551497		213.185	1	0.753586	-0.140167	1.11817	0.864827	0.503265		213.039	1	0.702991	0.467177	NaN	3.1366	1.04845		212.973	-1	1.3892	1.06446	1.52304	1.58723	0.812912
213.524	-1	1.70308	0.247925	1.27102	0.921065	1.08266		213.547	1	0.902591	0.950002	1.17218	1.87456	0.48453		213.685	1	0.646731	-0.141997	1.08956	0.93486	0.428402		213.539	1	0.742157	0.371241	NaN	3.12119	1.05421		213.473	-1	1.68944	1.02827	1.47695	1.57271	0.886541
214.024	-1	1.6566	0.233117	1.31202	0.990802	1.03026		214.047	1	0.881006	1.01996	1.25906	1.85069	0.419871		214.185	1	0.579814	-0.115845	1.08755	1.00702	0.330958		214.039	1	0.785056	0.291004	NaN	3.04091	1.11356		213.973	-1	2.02508	0.987695	1.4246	1.56244	0.962054
214.524	-1	1.59932	0.216869	1.34567	1.05667	0.967259		214.547	1	0.910536	1.11083	1.26882	1.84555	0.419753		214.685	1	0.586653	-0.0716654	1.09672	1.03907	0.293097		214.539	1	0.820155	0.250087	NaN	2.95027	1.17647		214.473	-1	2.47208	0.933284	1.35254	1.56554	1.04349
215.024	-1	1.48724	0.193314	1.34202	1.10287	0.850419		215.047	1	0.935019	1.19163	1.26847	1.82635	0.438102		215.185	1	0.602955	-0.0242717	1.1092	1.06149	0.263345		215.039	1	0.841483	0.278588	NaN	2.84137	1.24565		214.973	-1	2.91795	0.876788	1.28146	1.56131	1.13799
215.524	-1	1.39324	0.16708	1.34335	1.1377	0.72787		215.547	1	0.903652	1.22433	1.29652	1.74824	0.464244		215.685	1	0.635317	0.0301432	1.13059	1.05972	0.248161		215.539	1	0.895753	0.310729	NaN	2.71876	1.30253		215.473	-1	3.36217	0.817199	1.21184	1.54622	1.25185
216.024	-1	1.32582	0.136903	1.35201	1.1558	0.596926		216.047	1	0.897531	1.23683	1.30188	1.70547	0.499131		216.185	1	0.670388	0.0676617	1.13538	1.04272	0.253289		216.039	1	0.97374	0.345489	NaN	2.58629	1.35055		215.973	0	3.68144	0.765842	1.14596	1.51785	1.36816
216.524	-1	1.25695	0.11558	1.35674	1.16621	0.486706		216.547	1	0.911166	1.23353	1.28949	1.69036	0.540861		216.685	1	0.706973	0.0957254	1.13088	1.0172	0.269784		216.539	1	1.00899	0.412342	NaN	2.53991	1.34234		216.473	0	3.88611	0.722035	1.08351	1.47729	1.48673
217.024	-1	1.18676	0.102266	1.35793	1.16966	0.395236		217.047	1	0.871	1.21141	1.38496	1.65764	0.547858		217.185	1	0.722099	0.10026	1.11977	0.990665	0.292975		217.039	1	1.03354	0.487058	NaN	2.51497	1.32013		216.973	1	3.92986	0.6897	1.03574	1.42551	1.58367
217.524	-1	1.10068	0.0843903	1.35966	1.17001	0.385626		217.547	1	0.851003	1.19468	1.49091	1.62083	0.553908		217.685	1	0.733765	0.101002	1.10759	0.963966	0.317245		217.539	1	1.00584	0.493216	NaN	2.52704	1.28302		217.473	1	3.93285	0.66244	0.992069	1.37268	1.67524
218.024	-1	1.00913	0.0649424	1.36157	1.16929	0.404243		218.047	1	0.912413	1.20174	1.57751	1.58049	0.573048		218.185	1	0.751396	0.117789	1.14426	0.865407	0.315521		218.039	0	0.959714	0.525182	NaN	2.5309	1.25545		217.973	1	3.82433	0.667792	0.962943	1.33228	1.75292
218.524	-1	0.893485	0.0752535	1.37181	1.16049	0.491185		218.547	1	0.953209	1.26174	1.61528	1.51089	0.57676		218.685	1	0.76754	0.133068	1.18074	0.768395	0.317802		218.539	0	0.848865	0.647806	NaN	2.50593	1.26146		218.473	1	3.70148	0.674648	0.93755	1.28549	1.82431
219.024	-1	0.790266	0.0830176	1.38049	1.15397	0.578359		219.047	1	0.971761	1.37888	1.60034	1.40974	0.563828		219.185	1	0.776448	0.139515	1.20916	0.688673	0.341067		219.039	-1	0.751212	0.731261	NaN	2.52339	1.28326		218.973	1	3.54545	0.684984	0.920789	1.22393	1.88114
219.524	-1	0.736781	0.0790939	1.3826	1.15685	0.66234		219.547	0	1.08282	1.50671	1.57354	1.3254	0.552207		219.685	1	0.799938	0.142015	1.23887	0.667003	0.344241		219.539	-1	0.670273	0.765105	NaN	2.59459	1.32507		219.473	1	3.35169	0.693843	0.907436	1.16608	1.94164
220.024	-1	0.702242	0.089645	1.38183	1.16576	0.720319		220.047	-1	1.19253	1.6261	1.53194	1.24803	0.538062		220.185	1	0.838531	0.140425	1.26992	0.705463	0.326605		220.039	-1	0.596615	0.808463	NaN	2.67783	1.3423		219.973	1	3.12601	0.701453	0.896964	1.11138	2.00525
220.524	-1	0.695489	0.121426	1.37684	1.18349	0.740164		220.547	-1	1.23482	1.67772	1.3904	1.21077	0.5048		220.685	0	0.883958	0.135038	1.24875	0.801445	0.336624		220.539	-1	0.527384	0.857604	NaN	2.7684	1.34458		220.473	1	2.92339	0.689329	0.892809	1.06312	2.04115
221.024	-1	0.675199	0.143752	1.34179	1.2248	0.721728		221.047	-1	1.33723	1.6984	1.25063	1.18557	0.485932		221.185	0	0.932275	0.128047	1.20551	0.921753	0.358336		221.039	-1	0.482657	0.92838	NaN	2.90928	1.32637		220.973	1	2.72797	0.671034	0.890628	1.01689	2.06838
221.524	-1	0.646793	0.160409	1.28873	1.28024	0.680343		221.547	-1	1.51592	1.67982	1.11312	1.17567	0.485322		221.685	-1	0.980049	0.119133	1.19213	1.03944	0.390357		221.539	-1	0.461489	1.01489	NaN	3.05184	1.29679		221.473	1	2.53855	0.651146	0.880108	0.998944	2.09442
222.024	-1	0.625367	0.183348	1.22597	1.3101	0.686752		222.047	-1	1.56999	1.65849	0.978619	1.17173	0.488912		222.185	-1	1.02364	0.105487	1.17729	1.11856	0.415878		222.039	-1	0.54168	1.15438	NaN	3.06591	1.24256		221.973	1	2.37963	0.633055	0.870767	0.99231	2.11501
222.524	-1	0.611219	0.207977	1.16179	1.33422	0.706395		222.547	-1	1.58109	1.63898	0.851902	1.16952	0.494515		222.685	-1	1.05787	0.0815095	1.1528	1.11066	0.424455		222.539	-1	0.665769	1.28678	NaN	3.08377	1.22017		222.473	1	2.25562	0.617061	0.862956	0.998081	2.12934
223.024	-1	0.715091	0.236156	1.11728	1.36814	0.761031		223.047	-1	1.61158	1.68302	0.878478	1.15883	0.51238		223.185	-1	1.07194	0.0736407	1.29159	1.10391	0.425621		223.039	-1	0.826953	1.41317	NaN	3.10484	1.22468		222.973	1	2.13381	0.605632	0.85317	1.01699	2.1448
223.524	-1	0.825073	0.261648	1.08441	1.39129	0.814672		223.547	-1	1.61717	1.72592	0.936237	1.14721	0.51868		223.685	-1	1.06786	0.0802762	1.57738	1.0982	0.420116		223.539	-1	1.06664	1.51012	NaN	3.0824	1.29443		223.473	1	2.01276	0.59542	0.842841	1.03949	2.1607
224.024	-1	0.952195	0.279606	1.08422	1.38422	0.865524		224.047	-1	1.5747	1.76661	1.0542	1.13381	0.502649		224.185	-1	1.0656	0.0641837	1.84218	1.0423	0.397331		224.039	-1	1.33094	1.59778	NaN	3.04625	1.38468		223.973	1	1.92707	0.576436	0.832758	1.05585	2.20268
224.524	-1	1.0584	0.300221	1.08162	1.39246	0.90008		224.547	-1	1.59172	1.78367	1.16997	1.11513	0.485045		224.685	-1	1.06395	0.0405072	2.09998	0.969649	0.368779		224.539	-1	1.62148	1.65161	NaN	2.96058	1.52007		224.473	1	1.8399	0.557293	0.823208	1.06827	2.2396
225.024	-1	1.12822	0.325459	1.07484	1.42737	0.906286		225.047	-1	1.64204	1.7875	1.2845	1.0935	0.466561		225.185	-1	1.03121	0.0446417	2.31281	0.893431	0.353602		225.039	-1	1.89469	1.68943	NaN	2.85589	1.66618		224.973	1	1.74812	0.537658	0.815313	1.06842	2.26074
225.524	-1	1.13691	0.340124	1.06223	1.47375	0.883578		225.547	-1	1.65014	1.79239	1.35244	1.06915	0.433887		225.685	-1	0.997292	0.0417305	2.43579	0.818349	0.340024		225.539	-1	2.11367	1.67718	NaN	2.69171	1.84578		225.473	1	1.66366	0.51916	0.805616	1.06119	2.28147
226.024	-1	1.10216	0.347277	1.04547	1.52829	0.840325		226.047	-1	1.63273	1.80356	1.45	1.05094	0.403142		226.185	-1	0.963297	0.0175004	2.32609	0.746616	0.329359		226.039	-1	2.25348	1.65423	NaN	2.54207	2.015		225.973	1	1.59201	0.502652	0.792763	1.04104	2.30148
226.524	-1	1.07498	0.364663	1.01033	1.59064	0.803035		226.547	-1	1.57612	1.82758	1.62601	1.04657	0.381347		226.685	-1	0.914917	0.00276497	2.21466	0.710906	0.322305		226.539	-1	2.30096	1.6188	NaN	2.4094	2.1721		226.473	1	1.52679	0.486806	0.786518	1.02295	2.31279
227.024	-1	1.05008	0.383986	0.973105	1.65322	0.772591		227.047	-1	1.51174	1.86039	1.81747	1.05584	0.365365		227.185	-1	0.852427	-0.00265654	2.10153	0.710534	0.318793		227.039	-1	2.23379	1.56666	NaN	2.30107	2.33022		226.973	1	1.46617	0.471432	0.784982	1.00633	2.31789
227.524	-1	1.03499	0.399786	0.962487	1.69497	0.823159		227.547	-1	1.44025	1.90128	2.02313	1.07761	0.35472		227.685	-1	0.811404	0.0096138	1.99501	0.711881	0.32036		227.539	-1	2.11293	1.50669	NaN	2.20415	2.48881		227.473	1	1.45551	0.457789	0.790214	1.00588	2.33674
228.024	-1	1.03245	0.411545	0.952019	1.72662	0.877976		228.047	-1	1.38186	1.94567	2.21443	1.11794	0.346147		228.185	-1	0.778871	0.0288809	1.89111	0.713907	0.323935		228.039	-1	1.94763	1.44819	NaN	2.11209	2.6307		227.973	1	1.45594	0.444398	0.797018	1.00881	2.35855
228.524	-1	1.06142	0.413156	0.941926	1.73291	0.943465		228.547	-1	1.32758	1.99117	2.40122	1.16409	0.338225		228.685	-1	0.742733	0.0428253	1.82151	0.712628	0.370898		228.539	-1	1.78036	1.39082	NaN	2.02622	2.76738		228.473	1	1.47099	0.426357	0.808545	1.00819	2.38044
229.024	-1	1.06049	0.40958	0.914428	1.71505	1.01934		229.047	-1	1.28927	2.02626	2.40687	1.20642	0.336329		229.185	-1	0.703549	0.0561515	1.75576	0.710642	0.413158		229.039	-1	1.63408	1.34051	NaN	1.98113	2.87975		228.973	1	1.49989	0.408828	0.816985	0.996208	2.39335
229.524	-1	1.01918	0.399	0.863422	1.66458	1.10926		229.547	-1	1.24712	2.0515	2.39382	1.24618	0.333		229.685	-1	0.64874	0.068148	1.69789	0.70602	0.411645		229.539	-1	1.49906	1.29392	NaN	1.93458	2.98796		229.473	1	1.56727	0.392723	0.816853	0.952665	2.38128
230.024	-1	1.03639	0.380188	0.80179	1.63526	1.15179		230.047	-1	1.18837	2.03814	2.32012	1.276	0.32346		230.185	-1	0.623685	0.205706	1.61078	0.722885	0.427396		230.039	-1	1.3857	1.25451	NaN	1.88522	3.08815		229.973	1	1.59461	0.381841	0.822777	0.909132	2.37389
230.524	-1	1.08577	0.356849	0.734316	1.61757	1.16827		230.547	-1	1.13326	2.01627	2.23542	1.30284	0.309914		230.685	-1	0.647507	0.549524	1.47565	0.775047	0.471507		230.539	-1	1.31422	1.22164	NaN	1.85641	3.1787		230.473	1	1.55761	0.37935	0.838429	0.865614	2.37402
231.024	-1	1.09245	0.364075	0.680044	1.51862	1.23142		231.047	-1	1.08407	1.98062	2.13292	1.32488	0.289877		231.185	-1	0.608753	0.669787	1.35197	0.800075	0.497783		231.039	-1	1.27814	1.1943	NaN	1.84499	3.26111		230.973	1	1.48473	0.368116	0.856226	0.802034	2.33767
231.524	-1	1.09751	0.377404	0.637665	1.43155	1.29672		231.547	-1	1.07308	1.92786	2.06651	1.32615	0.266478		231.685	-1	0.52962	0.645794	1.23568	0.807596	0.51255		231.539	0	1.25129	1.17634	NaN	1.6928	3.35823		231.473	1	1.38999	0.351551	0.875331	0.72622	2.27907
232.024	-1	1.13676	0.408694	0.682452	1.53783	1.32798		232.047	-1	1.10009	1.85809	2.03601	1.30676	0.239734		232.185	0	0.537886	0.605237	1.14597	0.820409	0.563472		232.039	1	1.22637	1.16253	NaN	1.50253	3.45076		231.973	1	1.24327	0.337033	0.890341	0.685186	2.21405
232.524	-1	1.16024	0.442923	0.72998	1.61667	1.34593		232.547	-1	1.19682	1.80293	2.05768	1.29004	0.219274		232.685	0	0.562346	0.539503	1.06851	0.831071	0.618346		232.539	1	1.19655	1.15496	NaN	1.34327	3.49579		232.473	1	1.08683	0.322898	0.904585	0.650659	2.14784
233.024	-1	1.14784	0.483844	0.783748	1.63304	1.33355		233.047	-1	1.32292	1.75792	2.09589	1.27043	0.203077		233.185	1	0.54423	0.120132	1.09793	0.787912	0.610664		233.039	1	1.15243	1.14203	NaN	1.1771	3.54471		232.973	1	1.00173	0.288989	0.894814	0.623899	2.04092
233.524	-1	1.14269	0.520083	0.821791	1.6927	1.29854		233.547	-1	1.50564	1.81711	2.05046	1.15979	0.229361		233.685	1	0.534564	-0.195755	1.08936	0.768703	0.59723		233.539	1	1.07179	1.11537	NaN	0.993315	3.60358		233.473	1	0.927751	0.257266	0.886244	0.6044	1.93949
234.024	-1	1.14738	0.549981	0.838541	1.81099	1.23288		234.047	-1	1.62365	1.88787	2.00878	1.0614	0.261227		234.185	1	0.547157	-0.239099	0.980715	0.812576	0.568646		234.039	1	1.00984	1.07778	NaN	0.885571	3.64663		233.973	1	0.891014	0.238917	0.887378	0.616141	1.87009
234.524	-1	1.1972	0.548735	0.832731	1.79264	1.19111		234.547	-1	1.67202	1.97105	1.97113	0.976203	0.299103		234.685	1	0.531872	-0.19901	0.864347	0.859209	0.530623		234.539	1	0.966403	1.02934	NaN	0.853205	3.67399		234.473	1	0.867703	0.218925	0.896016	0.630672	1.80522
235.024	-1	1.26976	0.531799	0.815558	1.70546	1.16137		235.047	-1	1.7304	2.06443	1.91858	0.889036	0.31341		235.185	1	0.488329	-0.0743485	0.740148	0.908641	0.483029		235.039	1	0.930604	0.977945	NaN	0.831366	3.70136		234.973	1	0.86438	0.196488	0.915823	0.649358	1.7471
235.524	-1	1.20975	0.528007	0.848439	1.68068	1.16425		235.547	-1	1.79305	2.16215	1.85969	0.80103	0.317683		235.685	1	0.395969	0.0807919	0.639412	0.978184	0.457245		235.539	1	0.898037	0.925299	NaN	0.813982	3.72873		235.473	1	0.871583	0.179214	0.941603	0.661415	1.68172
236.024	-1	1.13274	0.525493	0.890914	1.66238	1.17099		236.047	-1	1.76994	2.17947	1.97964	0.765876	0.316042		236.185	1	0.284322	0.247974	0.547947	1.05567	0.440078		236.039	1	0.887073	0.94213	NaN	0.798725	3.79342		235.973	1	0.885722	0.16534	0.971317	0.669103	1.61157
236.524	-1	1.05936	0.518201	0.966569	1.62586	1.17332		236.547	-1	1.72257	2.17854	2.12965	0.743369	0.308326		236.685	1	0.252544	0.40451	0.551222	1.06257	0.445941		236.539	1	0.875382	0.971637	NaN	0.784546	3.86472		236.473	1	0.909226	0.148693	0.998646	0.684933	1.55536
237.024	-1	0.97871	0.508298	1.03496	1.59113	1.17277		237.047	-1	1.58831	2.16492	2.14725	0.739239	0.22733		237.185	1	0.22696	0.54491	0.557679	1.07517	0.450766		237.039	1	0.810322	0.99712	NaN	0.777938	3.93165		236.973	1	0.934235	0.131729	1.02505	0.702815	1.50252
237.524	-1	0.872758	0.489307	1.07806	1.56261	1.16225		237.547	-1	1.43979	2.13921	2.15464	0.735298	0.152748		237.685	1	0.208737	0.611346	0.553014	1.13456	0.444253		237.539	1	0.747343	0.996509	NaN	0.772059	4.00751		237.473	1	0.947703	0.121099	1.04216	0.727447	1.45806
238.024	-1	0.848474	0.475616	1.08199	1.47567	1.15643		238.047	-1	1.25088	2.07923	2.13305	0.731895	0.0963505		238.185	1	0.221978	0.664414	0.544882	1.19261	0.445059		238.039	1	0.689179	0.935529	NaN	0.767866	4.10402		237.973	1	0.958488	0.111167	1.05892	0.75223	1.41236
238.524	-1	0.926047	0.468532	1.03706	1.31588	1.15647		238.547	0	1.09619	1.99772	2.09949	0.725851	0.0455047		238.685	1	0.28398	0.696763	0.531377	1.24858	0.457208		238.539	1	0.611073	0.837202	NaN	0.765321	4.12695		238.473	1	0.96173	0.103199	1.07466	0.777435	1.36317
239.024	-1	0.982164	0.470629	0.991355	1.20112	1.15728		239.047	0	0.978354	1.89303	2.05304	0.716964	0.000635093		239.185	1	0.300998	0.724024	0.568293	1.31948	0.469715		239.039	1	0.524502	0.723023	NaN	0.763476	4.11865		238.973	1	0.964138	0.094671	1.0856	0.806843	1.31039
239.524	-1	1.02839	0.476959	0.945298	1.10713	1.15843		239.547	1	0.912675	1.77299	2.00913	0.721677	-0.0164968		239.685	1	0.288695	0.747969	0.638072	1.40012	0.482455		239.539	1	0.471536	0.621474	NaN	0.759088	4.11521		239.473	1	0.965719	0.0855858	1.09178	0.840419	1.25402
240.024	-1	1.07356	0.511104	0.998378	1.0256	1.16513		240.047	1	0.884457	1.64192	1.96704	0.736157	-0.0137072		240.185	1	0.278668	0.736846	0.697487	1.45697	0.521726		240.039	1	0.42697	0.52646	NaN	0.754189	4.11337		239.973	1	0.957883	0.0792636	1.10411	0.87481	1.19209
240.524	-1	1.11783	0.548573	1.0651	0.949647	1.17244		240.547	1	0.800974	1.6153	1.92397	0.805648	-0.00756337		240.685	1	0.266658	0.720265	0.755352	1.50823	0.568043		240.539	1	0.408437	0.520214	NaN	0.750248	4.12463		240.473	1	0.94642	0.0740051	1.1188	0.909516	1.12801
241.024	-1	1.13259	0.57558	1.16417	1.02737	1.17544		241.047	1	0.703762	1.61462	1.88066	0.888806	-0.00058624		241.185	1	0.206051	0.744234	0.82646	1.55006	0.641017		241.039	1	0.407882	0.511482	NaN	0.739716	4.12637		240.973	1	0.929704	0.0667091	1.13103	0.954903	1.07865
241.524	-1	1.11679	0.596285	1.25253	1.08142	1.18616		241.547	1	0.59611	1.70004	2.01116	0.964339	0.00909347		241.685	1	0.177087	0.771788	0.865833	1.60284	0.733028		241.539	1	0.422519	0.500648	NaN	0.723616	4.12007		241.473	1	0.911138	0.0596547	1.14267	1.00315	1.03012
242.024	-1	1.00673	0.597551	1.30788	1.06247	1.22066		242.047	1	0.492274	1.79126	2.12576	1.03877	0.0205253		242.185	1	0.230548	0.808676	0.822536	1.68418	0.874628		242.039	1	0.432868	0.481294	NaN	0.714245	4.08238		241.973	1	0.885171	0.0540716	1.15217	1.06233	0.982647
242.524	-1	0.903125	0.596626	1.32881	1.07608	1.27019		242.547	1	0.424325	1.91981	2.06881	1.10466	0.0471634		242.685	1	0.302149	0.808521	0.831272	1.75126	0.921545		242.539	1	0.444102	0.456156	NaN	0.704567	4.03677		242.473	1	0.869149	0.0470472	1.16154	1.12851	0.935937
243.024	-1	0.806395	0.593373	1.31317	1.1243	1.33569		243.047	0	0.370557	2.02333	1.99164	1.14248	0.0766165		243.185	1	0.391993	0.771115	0.892333	1.80402	0.873249		243.039	1	0.462295	0.421261	NaN	0.687352	3.99714		242.973	1	0.867871	0.037886	1.17071	1.20506	0.890355
243.524	-1	0.719295	0.582525	1.2739	1.13036	1.42302		243.547	0	0.346844	2.0738	1.87164	1.12081	0.112035		243.685	1	0.437338	0.686386	0.890433	1.83033	0.782155		243.539	1	0.476178	0.384189	NaN	0.682779	3.95972		243.473	1	0.85788	0.0286604	1.17369	1.30386	0.844446
244.024	-1	0.636224	0.568499	1.22474	1.11877	1.51948		244.047	-1	0.338914	2.1113	1.62985	1.09769	0.128353		244.185	1	0.465889	0.583797	0.86477	1.84665	0.674909		244.039	1	0.485418	0.344771	NaN	0.691824	3.9247		243.973	1	0.843045	0.019399	1.17321	1.41504	0.798356
244.524	-1	0.727167	0.558796	1.20715	1.14454	1.60062		244.547	-1	0.352675	2.13096	1.22071	1.07257	0.118425		244.685	1	0.450501	0.470207	0.865312	1.83687	0.482264		244.539	1	0.505801	0.303984	NaN	0.706099	3.89964		244.473	1	0.836815	0.0154494	1.17269	1.54108	0.7586
245.024	-1	0.822015	0.553408	1.18495	1.15677	1.67338		245.047	-1	0.375429	2.14388	1.07325	1.03067	0.113465		245.185	1	0.423016	0.375268	0.847665	1.82539	0.325391		245.039	1	0.530911	0.262616	NaN	0.722591	3.87881		244.973	1	0.833307	0.0131613	1.17214	1.67177	0.720821
245.524	-1	0.86784	0.561329	1.13553	1.10896	1.72278		245.547	-1	0.403207	2.15303	1.07196	0.979396	0.111281		245.685	1	0.34998	0.368767	0.740196	1.8121	0.353005		245.539	1	0.577124	0.281379	NaN	0.755368	3.82053		245.473	1	0.853618	0.0124847	1.15304	1.80772	0.682195
246.024	-1	0.969712	0.579382	1.11002	1.0834	1.7826		246.047	-1	0.507555	1.86676	1.16423	0.982474	0.0874352		246.185	1	0.30114	0.359057	0.695935	1.8362	0.399941		246.039	1	0.627929	0.313448	NaN	0.791818	3.75398		245.973	1	0.883025	0.0166842	1.13162	1.92946	0.645605
246.524	-1	1.14723	0.611109	1.11678	1.08787	1.85649		246.547	-1	0.627485	1.53727	1.28156	0.99417	0.0607333		246.685	1	0.268742	0.347167	0.694626	1.8857	0.460006		246.539	1	0.678368	0.35408	NaN	0.833588	3.68293		246.473	1	0.948184	0.0400514	1.10107	1.99528	0.617019
247.024	0	1.1687	0.621472	1.095	1.08723	1.89422		247.047	-1	0.784007	1.25977	1.51245	1.00392	0.0414241		247.185	1	0.2922	0.473013	0.837448	1.91508	0.498775		247.039	1	0.70781	0.406787	NaN	0.880169	3.60267		246.973	1	1.0124	0.0611868	1.07163	2.05702	0.589091
247.524	0	1.10443	0.620098	1.05753	1.08378	1.91208		247.547	-1	0.934817	0.987994	1.71407	1.01844	0.0189361		247.685	1	0.328501	0.630687	1.01342	1.93935	0.532133		247.539	1	0.671634	0.497239	NaN	0.941791	3.49363		247.473	1	1.05567	0.0328916	1.06671	2.02814	0.575736
248.024	1	1.05856	0.606606	1.07004	1.11239	1.97771		248.047	-1	1.07245	0.729431	1.84817	1.04401	-0.0108851		248.185	1	0.345455	0.759878	1.14018	1.91078	0.509152		248.039	1	0.585748	0.531694	NaN	1.01677	3.38613		247.973	1	1.09358	0.00518826	1.06006	2.0003	0.560329
248.524	1	1.01429	0.591399	1.08891	1.14494	2.04917		248.547	-1	1.16454	0.607936	1.98658	1.05052	-0.0307991		248.685	1	0.36824	0.922801	1.27648	1.88235	0.484994		248.539	1	0.474484	0.537558	NaN	1.09857	3.27943		248.473	1	1.10383	-0.019463	1.04444	1.97781	0.534336
249.024	1	0.808606	0.550794	1.07242	1.12603	2.03558		249.047	-1	1.19378	0.675567	2.13094	1.03075	-0.0370427		249.185	1	0.411064	1.20164	1.44558	1.85441	0.456796		249.039	1	0.37001	0.497093	NaN	1.20019	3.18901		248.973	1	1.1235	-0.054419	1.04648	1.95225	0.51052
249.524	1	0.625821	0.514807	1.05966	1.10866	2.02938		249.547	-1	1.17915	0.720655	2.20525	1.01972	-0.0412376		249.685	1	0.399107	1.30587	1.44002	1.81024	0.431827		249.539	1	0.266622	0.449223	NaN	1.30499	3.1012		249.473	1	1.15841	-0.106046	1.07707	1.92173	0.490222
250.024	1	0.603305	0.511138	1.07302	1.10204	2.07489		250.047	-1	1.1378	0.752008	2.23686	1.01401	-0.0441843		250.185	1	0.357392	1.31524	1.33958	1.75726	0.408612		250.039	1	0.202817	0.416942	NaN	1.39924	3.0562		249.973	1	1.23494	-0.123962	1.079	1.91756	0.458055
250.524	1	0.573384	0.502539	1.07663	1.07752	2.10727		250.547	-1	1.09082	0.777483	2.28585	1.01641	-0.0375173		250.685	1	0.409588	1.3689	1.30625	1.75288	0.499623		250.539	0	0.144941	0.388891	NaN	1.4925	3.00914		250.473	1	1.33672	-0.121426	1.06354	1.92936	0.418686
251.024	1	0.529406	0.484579	1.06172	1.01901	2.11473		251.047	-1	1.04261	0.801682	2.33861	1.02058	-0.0287627		251.185	1	0.477672	1.41156	1.27164	1.74169	0.597531		251.039	0	0.098588	0.379117	NaN	1.58692	2.91314		250.973	1	1.46715	-0.132511	1.04223	1.99113	0.31379
251.524	1	0.487741	0.466049	1.04644	0.958871	2.16699		251.547	-1	1.00913	0.811336	2.36257	1.01463	-0.0108066		251.685	1	0.567266	1.27735	1.12473	1.58959	0.595939		251.539	-1	0.0597537	0.398685	NaN	1.69086	2.81761		251.473	1	1.60294	-0.146141	1.01982	2.06223	0.196654
252.024	1	0.448003	0.447047	1.03086	0.897371	2.25655		252.047	-1	0.974983	0.820586	2.38042	1.00724	0.00866987		252.185	1	0.645626	1.15572	1.0098	1.45968	0.60329		252.039	-1	0.0303805	0.455174	NaN	1.80676	2.72268		251.973	1	1.5067	-0.12831	0.971342	2.12336	0.155094
252.524	1	0.384388	0.420185	1.02007	0.837427	2.3539		252.547	-1	0.904758	0.84134	2.30071	0.981516	0.0495598		252.685	1	0.698431	1.06272	0.96761	1.38028	0.630976		252.539	-1	0.0116255	0.483198	NaN	1.96914	2.59915		252.473	1	1.42016	-0.107971	0.945685	2.19759	0.114842
253.024	1	0.313488	0.390926	1.01075	0.777958	2.45363		253.047	0	0.833712	0.852007	2.21358	0.950425	0.0970928		253.185	1	0.717459	0.948355	0.947066	1.30769	0.627326		253.039	-1	-0.00360915	0.505041	NaN	2.14109	2.47645		252.973	1	1.38705	-0.0799208	1.01102	2.3238	0.0746508
253.524	1	0.265868	0.384213	0.996918	0.748477	2.54839		253.547	0	0.760358	0.834291	2.10559	0.904247	0.163318		253.685	1	0.689572	0.804317	0.956596	1.24459	0.580151		253.539	-1	0.00157784	0.508489	NaN	2.33724	2.41384		253.473	1	1.32217	-0.0440189	1.086	2.4102	0.0799586
254.024	1	0.222968	0.379423	0.982811	0.722058	2.63927		254.047	1	0.678481	0.811829	2.01128	0.860463	0.26716		254.185	1	0.645956	0.71623	1.05309	1.26404	0.579923		254.039	-1	0.0100151	0.512104	NaN	2.52578	2.34948		253.973	1	1.21468	0.00241915	1.17393	2.44319	0.146322
254.524	1	0.19176	0.367427	0.970934	0.689583	2.70766		254.547	1	0.58667	0.783837	1.9329	0.81947	0.41484		254.685	1	0.593407	0.659917	1.19896	1.33037	0.606356		254.539	-1	0.0259504	0.516103	NaN	2.69679	2.28105		254.473	1	1.23013	0.0261096	1.26198	2.49172	0.154243
255.024	1	0.162201	0.357385	0.958402	0.661187	2.77084		255.047	1	0.514085	0.733794	1.88277	0.785848	0.587797		255.185	1	0.585602	0.797655	1.37502	1.3965	0.632906		255.039	-1	0.0410886	0.513484	NaN	2.85125	2.20758		254.973	1	1.307	0.038433	1.35009	2.548	0.13296
255.524	1	0.135761	0.351043	0.944628	0.640517	2.82419		255.547	1	0.450483	0.67345	1.84585	0.755671	0.772562		255.685	1	0.580585	0.966396	1.55347	1.4604	0.658115		255.539	-1	0.0551359	0.501808	NaN	2.98308	2.12721		255.473	1	1.28259	0.0445574	1.35317	2.58353	0.116746
256.024	1	0.103727	0.338424	0.930506	0.62063	2.8666		256.047	1	0.380093	0.623796	1.77366	0.73231	0.965496		256.185	1	0.502416	1.10101	1.6902	1.49133	0.662959		256.039	-1	0.0597118	0.504426	NaN	3.10435	2.03775		255.973	1	1.24518	0.0498532	1.34519	2.61641	0.101211
256.524	1	0.0652628	0.318589	0.915982	0.601643	2.89643		256.547	1	0.308719	0.576367	1.6908	0.711001	1.15875		256.685	1	0.434603	1.22191	1.83624	1.51589	0.646257		256.539	-1	0.0594648	0.514322	NaN	3.22024	1.94367		256.473	1	1.24443	0.051192	1.34144	2.6594	0.089233
257.024	1	0.0525623	0.307634	0.906346	0.596489	2.92247		257.047	1	0.268721	0.510303	1.5176	0.706726	1.27463		257.185	1	0.393578	1.30732	2.00638	1.52395	0.57382		257.039	-1	0.056844	0.518764	NaN	3.33146	1.85999		256.973	1	1.24721	0.0523009	1.33704	2.71319	0.0788152
257.524	1	0.0507256	0.300424	0.89877	0.597168	2.94691		257.547	1	0.229099	0.443461	1.3482	0.703713	1.38822		257.685	1	0.358479	1.28982	2.14564	1.52664	0.516559		257.539	-1	0.0545134	0.520771	NaN	3.43581	1.77775		257.473	1	1.26217	0.0526179	1.33045	2.8042	0.0737697
258.024	1	0.0788861	0.295026	0.888476	0.601043	2.94605		258.047	1	0.192177	0.371034	1.20604	0.709754	1.48542		258.185	1	0.329168	1.17176	2.25473	1.52409	0.474128		258.039	-1	0.0540705	0.518408	NaN	3.52298	1.69481		257.973	1	1.277	0.0515989	1.31916	2.89003	0.068691
258.524	1	0.115131	0.289281	0.87827	0.602531	2.94267		258.547	1	0.161872	0.300009	1.10083	0.715491	1.57496		258.685	1	0.381556	1.07198	2.2831	1.49873	0.409843		258.539	-1	0.0628093	0.497165	NaN	3.59191	1.63258		258.473	1	1.29165	0.0489097	1.30198	2.96941	0.0635707
259.024	1	0.179935	0.281036	0.869619	0.59065	2.93686		259.047	1	0.145538	0.23194	1.07362	0.720584	1.64829		259.185	1	0.470103	0.980285	2.27576	1.46327	0.335885		259.039	-1	0.0813997	0.455665	NaN	3.64128	1.59259		258.973	1	1.30473	0.0477234	1.27768	3.04819	0.0600021
259.524	1	0.237426	0.2723	0.86282	0.570235	2.92125		259.547	1	0.132685	0.171669	1.05226	0.727422	1.74144		259.685	1	0.522983	0.858695	2.11149	1.41582	0.355203		259.539	0	0.0780138	0.433562	NaN	3.67997	1.54426		259.473	1	1.31661	0.0476924	1.24791	3.1265	0.0576261
260.024	1	0.283235	0.262777	0.858978	0.53619	2.89		260.047	1	0.12328	0.119123	1.03671	0.73599	1.8542		260.185	1	0.571513	0.728767	1.9294	1.37129	0.379439		260.039	1	0.0905981	0.371681	NaN	3.68252	1.51577		259.973	1	1.3224	0.0486706	1.23018	3.2041	0.0530924
260.524	1	0.31483	0.254261	0.865022	0.499066	2.87375		260.547	1	0.127552	0.0778686	1.06342	0.733116	1.91677		260.685	1	0.613939	0.559566	1.73004	1.35654	0.372656		260.539	1	0.12972	0.248174	NaN	3.63268	1.51787		260.473	1	1.32755	0.049987	1.21649	3.28152	0.0481976
261.024	1	0.337184	0.2464	0.877494	0.459941	2.86724		261.047	1	0.137091	0.0409625	1.1064	0.725838	1.96001		261.185	1	0.667788	0.396187	1.59776	1.36326	0.370193		261.039	1	0.149231	0.182525	NaN	3.60273	1.49175		260.973	1	1.36426	0.054898	1.2458	3.3585	0.049507
261.524	1	0.329949	0.238793	0.883003	0.447617	2.84189		261.547	1	0.138652	0.00834328	1.09275	0.737873	2.05816		261.685	1	0.742966	0.243678	1.59071	1.41005	0.375795		261.539	1	0.157333	0.150536	NaN	3.58437	1.44923		261.473	1	1.40169	0.0562519	1.27491	3.44076	0.0499696
262.024	1	0.312711	0.231282	0.88617	0.444107	2.81702		262.047	1	0.139653	-0.0211379	1.0902	0.74615	2.1436		262.185	1	0.831458	0.154281	1.50607	1.38993	0.386248		262.039	1	0.164454	0.0910104	NaN	3.54392	1.42867		261.973	1	1.44116	0.0476584	1.3035	3.53781	0.048064
262.524	1	0.282544	0.223914	0.886338	0.451463	2.80735		262.547	1	0.14029	-0.0357029	1.16328	0.72878	2.14573		262.685	1	0.932082	0.122399	1.3507	1.30884	0.401123		262.539	1	0.168722	0.0383737	NaN	3.50208	1.40737		262.473	1	1.4672	0.0429865	1.31555	3.59927	0.0459689
263.024	1	0.255612	0.215493	0.884274	0.461471	2.78286		263.047	1	0.139494	-0.0480114	1.24257	0.71404	2.15724		263.185	1	1.05484	0.161425	1.32046	1.22525	0.39857		263.039	1	0.149203	0.0852909	NaN	3.47902	1.34866		262.973	1	1.47897	0.0424786	1.31004	3.62293	0.0436727
263.524	1	0.239871	0.203422	0.874489	0.48066	2.70711		263.547	1	0.132224	-0.0501233	1.34988	0.711181	2.21115		263.685	1	1.18558	0.226042	1.33538	1.14076	0.389727		263.539	1	0.132	0.120881	NaN	3.45453	1.30274		263.473	1	1.4684	0.0387201	1.26767	3.64844	0.0394726
264.024	1	0.240879	0.203679	0.876851	0.496843	2.66623		264.047	1	0.122946	-0.0144019	1.43665	0.700639	2.24704		264.185	1	1.20541	0.278744	1.14437	1.05398	0.414158		264.039	1	0.119679	0.132597	NaN	3.42703	1.28381		263.973	1	1.44656	0.0333211	1.20669	3.6749	0.0343116
264.524	1	0.261143	0.218109	0.893177	0.509571	2.66545		264.547	1	0.110412	0.0826822	1.49012	0.677639	2.25371		264.685	1	1.21095	0.321823	0.978107	0.984844	0.433506		264.539	1	0.107867	0.151246	NaN	3.43926	1.25206		264.473	1	1.47394	0.0329562	1.14455	3.65286	0.028553
265.024	1	0.290907	0.229076	0.891298	0.51538	2.69935		265.047	1	0.0949876	0.176442	1.50864	0.665807	2.26872		265.185	1	1.16772	0.3131	1.0165	1.01802	0.413552		265.039	1	0.0960221	0.174546	NaN	3.46803	1.23874		264.973	1	1.51839	0.0339202	1.08296	3.61848	0.0226826
265.524	1	0.324647	0.238593	0.8818	0.518295	2.74777		265.547	1	0.0776433	0.267995	1.50395	0.661388	2.28925		265.685	1	1.12407	0.290345	0.992604	1.03891	0.405512		265.539	1	0.0827768	0.223674	NaN	3.55573	1.41563		265.473	1	1.70337	0.0327715	1.05594	3.6228	0.0188825
266.024	1	0.356648	0.265772	0.871343	0.520504	2.82327		266.047	1	0.0748616	0.350875	1.4028	0.677029	2.31018		266.185	1	1.07972	0.243902	0.863542	1.03907	0.417584		266.039	1	0.0840868	0.258307	NaN	3.63742	1.56487		265.973	1	1.89261	0.0296785	1.03588	3.6099	0.0150709
266.524	1	0.388498	0.290755	0.857259	0.516659	2.92654		266.547	1	0.0752205	0.431884	1.28084	0.696996	2.3312		266.685	1	1.08466	0.217298	0.806538	1.0415	0.406199		266.539	1	0.113351	0.265104	NaN	3.70759	1.66101		266.473	1	2.09364	0.0212036	1.03504	3.54932	0.0112275
267.024	1	0.420546	0.287594	0.818485	0.47094	3.20459		267.047	1	0.0970574	0.445197	1.27177	0.710017	2.43484		267.185	1	1.12268	0.204008	0.797894	1.04546	0.379072		267.039	1	0.169766	0.220233	NaN	3.66755	1.79682		266.973	1	2.24056	0.0132333	1.04102	3.53713	0.00818808
267.524	1	0.451986	0.282382	0.784812	0.422069	3.46862		267.547	1	0.116269	0.454784	1.27995	0.724949	2.53584		267.685	1	1.17537	0.263971	0.808571	1.14697	0.351877		267.539	1	0.216259	0.166724	NaN	3.59688	1.83526		267.473	1	2.33001	0.00579873	1.05423	3.57632	0.00600227
268.024	1	0.481557	0.27086	0.766828	0.363508	3.68957		268.047	1	0.123043	0.465895	1.32024	0.747238	2.61244		268.185	1	1.22948	0.340425	0.82352	1.26835	0.324674		268.039	1	0.211182	0.134075	NaN	3.53639	1.56564		267.973	1	2.31866	0.00183022	1.0955	3.57035	0.00998469
268.524	1	0.512213	0.260139	0.74915	0.332552	3.95104		268.547	1	0.114752	0.468952	1.41335	0.768604	2.66833		268.685	1	1.22379	0.42387	0.837827	1.33092	0.297709		268.539	1	0.184339	0.0914437	NaN	3.49295	1.36991		268.473	1	2.26904	-0.000822272	1.14744	3.54725	0.0163091
269.024	1	0.544751	0.250807	0.732004	0.349497	4.28281		269.047	1	0.0888751	0.462607	1.56812	0.788894	2.70004		269.185	1	1.20268	0.497328	0.856435	1.38521	0.283123		269.039	1	0.148282	0.0445877	NaN	3.45674	1.20547		268.973	1	2.19169	0.0230741	1.21491	3.50758	0.0285248
269.524	1	0.57978	0.256487	0.706625	0.350107	4.40782		269.547	1	0.0582969	0.440144	1.64881	0.835414	2.64507		269.685	1	1.13648	0.541609	0.887606	1.41528	0.304707		269.539	1	0.0854841	0.0550242	NaN	3.5246	0.982164		269.473	0	2.10702	0.0548542	1.28548	3.44817	0.042828
270.024	1	0.616575	0.272807	0.675409	0.339138	4.38628		270.047	1	0.0255164	0.410131	1.69481	0.894221	2.5495		270.185	1	1.06777	0.567791	0.914796	1.41345	0.329386		270.039	1	0.0450782	0.0740215	NaN	3.54287	0.817863		269.973	0	1.99048	0.129736	1.35964	3.14925	0.0715457
270.524	1	0.664954	0.296399	0.616337	0.400882	4.2768		270.547	1	0.00353685	0.375719	1.69101	0.965586	2.47879		270.685	1	0.994724	0.562649	0.935097	1.35642	0.359421		270.539	1	0.0521293	0.100307	NaN	3.44883	0.776746		270.473	-1	1.86432	0.207859	1.42003	2.83983	0.100034
271.024	1	0.708957	0.316709	0.553559	0.449052	4.11455		271.047	1	-0.0154176	0.340075	1.67325	1.04047	2.41505		271.185	1	0.951365	0.571359	1.00304	1.33173	0.380107		271.039	1	0.0719047	0.14498	NaN	3.30902	0.738697		270.973	-1	1.71399	0.294119	1.44587	2.50408	0.127944
271.524	1	0.738345	0.326517	0.490423	0.440175	3.84873		271.547	1	-0.0118238	0.331598	1.57263	1.10828	2.35071		271.685	1	0.929119	0.589919	1.10487	1.33004	0.394147		271.539	1	0.106334	0.20365	NaN	3.14554	0.718733		271.473	-1	1.57006	0.371431	1.46424	2.21135	0.150344
272.024	1	0.766616	0.332158	0.447229	0.475761	3.65034		272.047	1	-0.00513204	0.323427	1.47926	1.16841	2.29448		272.185	1	0.911119	0.593456	1.20776	1.3213	0.386534		272.039	1	0.170776	0.285534	NaN	2.95567	0.746867		271.973	-1	1.4319	0.440654	1.47586	1.95751	0.167762
272.524	1	0.794335	0.336038	0.412551	0.529725	3.48028		272.547	1	0.0120973	0.314436	1.42066	1.19877	2.2703		272.685	1	0.894203	0.593162	1.31091	1.31076	0.373399		272.539	1	0.20128	0.303217	NaN	2.83816	0.876291		272.473	-1	1.33439	0.486645	1.47081	1.79154	0.18285
273.024	1	0.805572	0.334669	0.41997	0.560759	3.36115		273.047	1	0.0268014	0.307306	1.35796	1.22404	2.2375		273.185	1	0.88273	0.601475	1.41007	1.32605	0.37431		273.039	1	0.210599	0.289397	NaN	2.75777	1.05263		272.973	-1	1.25926	0.519838	1.45658	1.67397	0.196655
273.524	1	0.814184	0.331287	0.429041	0.59148	3.24907		273.547	1	0.0361833	0.304099	1.28663	1.23856	2.18653		273.685	1	0.870657	0.607786	1.49189	1.34107	0.375375		273.539	1	0.199541	0.281432	NaN	2.67915	1.20525		273.473	-1	1.19354	0.530665	1.43116	1.59219	0.193136
274.024	1	0.811308	0.319094	0.445348	0.620829	3.16787		274.047	1	0.0467669	0.296047	1.22965	1.25885	2.13465		274.185	1	0.856253	0.606662	1.51227	1.35414	0.376467		274.039	1	0.19157	0.270695	NaN	2.61304	1.35257		273.973	-1	1.12813	0.538156	1.39671	1.51518	0.186183
274.524	1	0.790135	0.301893	0.469365	0.656025	3.07276		274.547	1	0.0583667	0.283899	1.18482	1.28404	2.08201		274.685	1	0.837097	0.607673	1.53067	1.36796	0.375081		274.539	1	0.18904	0.255069	NaN	2.56899	1.49053		274.473	-1	1.05624	0.542674	1.30925	1.43891	0.170984
275.024	1	0.75104	0.279788	0.500933	0.696947	2.96403		275.047	1	0.0689508	0.253661	1.17345	1.34421	2.01039		275.185	1	0.812067	0.611322	1.54662	1.38271	0.370632		275.039	1	0.242375	0.292944	NaN	2.54189	1.53557		274.973	-1	1.0174	0.543541	1.21489	1.35641	0.153488
275.524	1	0.697561	0.263367	0.541197	0.745245	2.851		275.547	1	0.0792177	0.217773	1.17255	1.41531	1.93283		275.685	1	0.786154	0.611786	1.56245	1.38843	0.366434		275.539	1	0.332554	0.366102	NaN	2.52597	1.51932		275.473	-1	1.04109	0.537498	1.10747	1.2621	0.131647
276.024	1	0.64809	0.248966	0.585261	0.792486	2.73438		276.047	1	0.080191	0.197189	1.12933	1.46993	1.83972		276.185	1	0.759239	0.608638	1.57815	1.38392	0.362522		276.039	1	0.484705	0.439677	NaN	2.4914	1.4864		275.973	-1	1.0784	0.534151	0.992721	1.18141	0.11445
276.524	1	0.631081	0.234104	0.631061	0.826507	2.61105		276.547	1	0.0798089	0.18304	1.08151	1.52073	1.74539		276.685	1	0.709472	0.598146	1.6042	1.38522	0.296875		276.539	1	0.663065	0.513429	NaN	2.44894	1.44643		276.473	-1	1.13135	0.533899	0.869546	1.11637	0.102589
277.024	1	0.619978	0.218629	0.676144	0.874549	2.49547		277.047	1	0.0809238	0.213991	1.05819	1.55808	1.66524		277.185	1	0.648712	0.584122	1.63522	1.38933	0.20153		277.039	1	0.863026	0.546944	NaN	2.39229	1.37769		276.973	-1	1.20333	0.522164	0.765786	1.03243	0.0871666
277.524	1	0.615068	0.202388	0.720747	0.93467	2.38805		277.547	1	0.0818449	0.260714	1.02273	1.57569	1.59905		277.685	1	0.613979	0.575494	1.6802	1.41383	0.114717		277.539	1	1.04913	0.569329	NaN	2.32938	1.31406		277.473	-1	1.28402	0.505164	0.670931	0.939826	0.0701119
278.024	1	0.661261	0.175847	0.770018	1.01123	2.34928		278.047	1	0.0823186	0.343853	0.959252	1.54771	1.56509		278.185	1	0.585305	0.570185	1.72594	1.44043	0.0363547		278.039	1	1.14368	0.539459	NaN	2.23393	1.29183		277.973	-1	1.30812	0.494283	0.600796	0.885557	0.0405122
278.524	1	0.703231	0.154798	0.815625	1.08001	2.29424		278.547	1	0.102243	0.411166	0.904726	1.45862	1.54681		278.685	1	0.579922	0.58692	1.76339	1.46316	0.0195725		278.539	1	1.17866	0.526581	NaN	2.1554	1.2774		278.473	-1	1.32948	0.483952	0.532224	0.836891	0.01294
279.024	1	0.73646	0.145113	0.85365	1.1327	2.20553		279.047	1	0.134307	0.467079	0.851046	1.33152	1.53765		279.185	1	0.587535	0.590515	1.80448	1.48185	0.011963		279.039	1	1.1635	0.528005	NaN	2.0911	1.26953		278.973	-1	1.39479	0.474663	0.452953	0.844115	0.0551492
279.524	1	0.764465	0.132765	0.874463	1.17805	2.10796		279.547	1	0.17142	0.483651	0.689894	1.19156	1.51731		279.685	1	0.622286	0.56667	1.85314	1.4921	0.0235093		279.539	0	1.08003	0.532395	NaN	2.04525	1.2561		279.473	-1	1.46442	0.466412	0.38515	0.862908	0.107363
280.024	1	0.787137	0.118964	0.879225	1.21529	2.00332		280.047	1	0.211599	0.489457	0.539104	1.05758	1.4961		280.185	1	0.664388	0.643921	1.91746	1.47955	0.0808653		280.039	-1	0.986352	0.535343	NaN	2.01507	1.23831		279.973	-1	1.54513	0.460811	0.346694	0.911303	0.185176
280.524	1	0.773324	0.133256	0.819866	1.17845	1.90987		280.547	1	0.260447	0.464813	0.417625	0.940506	1.47244		280.685	1	0.712568	0.804759	1.99472	1.44813	0.176097		280.539	-1	0.941814	0.52771	NaN	2.02951	1.20869		280.473	-1	1.6199	0.456698	0.323489	0.961344	0.268045
281.024	1	0.756044	0.147817	0.750353	1.13782	1.83178		281.047	1	0.301593	0.457097	0.303441	0.910054	1.44444		281.185	1	0.732752	0.946277	2.04825	1.40594	0.208188		281.039	-1	0.905729	0.520431	NaN	2.05507	1.17699		280.973	-1	1.68878	0.454062	0.315438	1.01302	0.355936
281.524	1	0.718413	0.163962	0.621265	1.07489	1.8438		281.547	1	0.334466	0.46756	0.19709	0.972613	1.41178		281.685	1	0.744724	1.08213	2.09482	1.36059	0.221758		281.539	-1	0.882188	0.513677	NaN	2.09713	1.14221		281.473	-1	1.82982	0.454349	0.32317	1.01619	0.388791
282.024	1	0.675177	0.194724	0.501893	1.00665	1.86279		282.047	1	0.408871	0.461489	0.202198	1.04164	1.408		282.185	1	0.795	1.26202	2.07554	1.32565	0.308348		282.039	-1	0.833886	0.525925	NaN	2.12198	1.12472		281.973	-1	1.99884	0.455769	0.337022	1.00055	0.400307
282.524	1	0.62223	0.250809	0.399354	0.929212	1.89388		282.547	1	0.492715	0.455233	0.260242	1.11163	1.41582		282.685	1	0.842537	1.41539	2.06336	1.29371	0.37526		282.539	-1	0.772794	0.54381	NaN	2.13377	1.11946		282.473	-1	2.17359	0.479638	0.342076	1.02711	0.405144
283.024	1	0.595866	0.300249	0.32479	0.865394	1.91648		283.047	1	0.525739	0.487637	0.324266	1.17113	1.41429		283.185	1	0.879064	1.46545	2.07939	1.27334	0.365121		283.039	-1	0.675908	0.566897	NaN	2.09844	1.1567		282.973	-1	2.3537	0.50544	0.347333	1.0546	0.411013
283.524	1	0.590322	0.349805	0.276275	0.811078	1.93721		283.547	1	0.565774	0.515322	0.395295	1.21519	1.40585		283.685	1	0.936601	1.5108	2.10626	1.25862	0.352566		283.539	-1	0.561857	0.563301	NaN	2.03773	1.21286		283.473	-1	2.59223	0.537507	0.361362	1.06223	0.433791
284.024	1	0.622218	0.416734	0.28796	0.770088	1.97		284.047	1	0.618155	0.534701	0.478662	1.23207	1.38527		284.185	1	1.02337	1.5496	2.14823	1.25177	0.33665		284.039	-1	0.427912	0.52878	NaN	1.94761	1.29095		283.973	-1	2.8039	0.567855	0.373735	1.06695	0.454301
284.524	1	0.694731	0.434615	0.286412	0.828788	1.99832		284.547	1	0.600715	0.534837	0.669152	1.24649	1.30493		284.685	1	1.08513	1.5792	2.2074	1.23464	0.337076		284.539	-1	0.360399	0.504336	NaN	1.86068	1.34661		284.473	-1	2.95277	0.594184	0.382236	1.06488	0.469506
285.024	1	0.789619	0.425476	0.277576	0.942404	2.02418		285.047	1	0.529585	0.519873	0.93914	1.25806	1.17719		285.185	1	1.13082	1.6029	2.27764	1.21091	0.348003		285.039	-1	0.309261	0.477722	NaN	1.77881	1.39635		284.973	-1	3.08869	0.608195	0.397963	1.03981	0.47719
285.524	1	0.849216	0.425297	0.27806	1.05933	2.04272		285.547	1	0.490166	0.499477	1.02632	1.2267	1.00799		285.685	1	1.16854	1.59074	2.20895	1.19304	0.37186		285.539	-1	0.323064	0.409268	NaN	1.74752	1.41977		285.473	-1	3.21289	0.611079	0.420217	0.993976	0.478082
286.024	1	0.902188	0.424499	0.280085	1.17327	2.05818		286.047	0	0.44255	0.486052	1.15487	1.19702	0.849222		286.185	1	1.20141	1.57177	2.11216	1.17861	0.399723		286.039	-1	0.388147	0.374149	NaN	1.747	1.41379		285.973	-1	3.25073	0.611559	0.440443	1.04612	0.475795
286.524	1	0.938907	0.395464	0.283452	1.23799	2.04625		286.547	0	0.369227	0.494487	1.41316	1.1726	0.723189		286.685	1	1.18247	1.55742	2.00634	1.20041	0.450435		286.539	-1	0.493165	0.364991	NaN	1.77044	1.38492		286.473	-1	3.26207	0.611302	0.460046	1.12833	0.472533
287.024	1	0.931607	0.404981	0.302809	1.20744	2.08218		287.047	-1	0.413594	0.535378	1.5042	1.15708	0.653648		287.185	1	1.1493	1.51885	1.89708	1.19245	0.48758		287.039	-1	0.603472	0.375009	NaN	1.79236	1.36601		286.973	-1	3.16311	0.620512	0.501013	1.23442	0.49266
287.524	1	0.892044	0.442198	0.332602	1.10197	2.15355		287.547	-1	0.498839	0.587543	1.53714	1.14465	0.60373		287.685	1	1.07956	1.41806	1.77901	1.10803	0.489872		287.539	-1	0.715248	0.390354	NaN	1.81386	1.34987		287.473	-1	3.07276	0.631333	0.540856	1.33657	0.514101
288.024	1	0.881383	0.443125	0.326523	0.958186	2.20084		288.047	-1	0.607469	0.695922	1.58371	1.13276	0.613251		288.185	1	1.00734	1.32875	1.74112	1.00411	0.52082		288.039	-1	0.968474	0.3568	NaN	1.82293	1.31003		287.973	-1	3.0688	0.654605	0.568569	1.40248	0.543766
288.524	1	0.91131	0.441161	0.313212	0.875786	2.22926		288.547	-1	0.721562	0.809036	1.58719	1.11121	0.622542		288.685	1	0.93266	1.25085	1.78292	0.880802	0.58024		288.539	-1	1.21571	0.308721	NaN	1.84927	1.27749		288.473	-1	3.07345	0.674258	0.590813	1.42659	0.582216
289.024	1	0.977451	0.436296	0.293786	0.843673	2.24128		289.047	-1	0.858235	0.938845	1.39668	1.0464	0.626034		289.185	1	0.864655	1.19725	1.81264	0.723961	0.664382		289.039	-1	1.44928	0.238606	NaN	1.90381	1.25737		288.973	-1	3.09596	0.686409	0.601718	1.36407	0.638876
289.524	1	1.13672	0.413611	0.26948	0.796878	2.22502		289.547	-1	0.917952	1.08404	1.17539	0.994116	0.619888		289.685	1	0.799102	1.15257	1.83792	0.554804	0.757602		289.539	-1	1.70441	0.149891	NaN	2.04981	1.22528		289.473	-1	3.17124	0.694564	0.614592	1.32426	0.692105
290.024	1	1.21656	0.393311	0.23793	0.77877	2.20723		290.047	-1	0.929827	1.23751	0.93614	0.950771	0.606821		290.185	1	0.76385	1.19113	1.91192	0.497074	0.907125		290.039	-1	1.91916	0.0731573	NaN	2.22132	1.1944		289.973	-1	3.28718	0.699639	0.628985	1.30195	0.742691
290.524	1	1.22489	0.37516	0.199857	0.786491	2.18807		290.547	-1	0.891722	1.34544	0.728075	0.965621	0.54728		290.685	1	0.731999	1.23094	1.97883	0.45403	1.05454		290.539	-1	1.90827	0.0888025	NaN	2.31641	1.19381		290.473	-1	3.33113	0.705792	0.677179	1.28057	0.782945
291.024	1	1.11876	0.368347	0.183161	0.815766	2.11904		291.047	-1	0.855687	1.43028	0.619157	0.981336	0.492887		291.185	1	0.705908	1.23714	1.97839	0.445476	1.16125		291.039	-1	1.86404	0.11818	NaN	2.39724	1.19717		290.973	-1	3.35427	0.711874	0.735009	1.26003	0.818258
291.524	1	0.966679	0.358811	0.170489	0.855804	2.01881		291.547	-1	0.821745	1.49176	0.610585	0.997927	0.443704		291.685	1	0.682459	1.23511	1.97652	0.434959	1.26192		291.539	-1	1.78667	0.161202	NaN	2.4639	1.20446		291.473	-1	3.33504	0.704143	0.807555	1.26126	0.773743
292.024	1	0.761028	0.344023	0.161205	0.908991	1.87905		292.047	-1	0.78489	1.51549	0.6981	1.00152	0.405282		292.185	1	0.663539	1.21897	1.97219	0.421076	1.35227		292.039	-1	1.66492	0.192719	NaN	2.48693	1.196		291.973	-1	3.30712	0.698095	0.880721	1.24175	0.731651
292.524	1	0.603608	0.341596	0.183976	0.968503	1.73416		292.547	-1	0.746617	1.52418	0.823022	0.999691	0.371818		292.685	1	0.647708	1.20261	1.95832	0.40078	1.4472		292.539	-1	1.53092	0.219355	NaN	2.50114	1.18255		292.473	-1	3.2283	0.701909	0.957521	1.10071	0.703754
293.024	1	0.471508	0.342543	0.218875	1.03188	1.5906		293.047	-1	0.694687	1.51108	0.963466	0.979261	0.375654		293.185	1	0.633937	1.1861	1.9381	0.376204	1.54518		293.039	-1	1.44511	0.233282	NaN	2.61025	1.17664		292.973	-1	3.11733	0.702086	1.01823	1.00105	0.689924
293.524	1	0.376646	0.331901	0.246622	1.10383	1.47028		293.547	-1	0.639222	1.48842	1.10028	0.956493	0.377446		293.685	1	0.621071	1.18336	1.89692	0.351828	1.67042		293.539	-1	1.36204	0.239718	NaN	2.71707	1.17162		293.473	-1	2.95516	0.696472	1.05332	0.967264	0.698489
294.024	1	0.299486	0.320654	0.27796	1.18761	1.36224		294.047	-1	0.579648	1.45464	1.23286	0.931007	0.376862		294.185	1	0.609263	1.18276	1.85769	0.327837	1.80178		294.039	-1	1.28191	0.238124	NaN	2.82143	1.16755		293.973	-1	2.80633	0.696756	1.07678	0.932004	0.733693
294.524	1	0.238519	0.308952	0.312519	1.28198	1.26529		294.547	-1	0.523481	1.42947	1.24094	0.916814	0.370732		294.685	1	0.611219	1.17717	1.90603	0.309231	1.95214		294.539	-1	1.19465	0.247656	NaN	2.88861	1.17919		294.473	-1	2.6755	0.704995	1.08456	0.894758	0.804821
295.024	1	0.21797	0.307392	0.347833	1.37477	1.17992		295.047	-1	0.4689	1.40831	1.19102	0.907883	0.362017		295.185	1	0.610455	1.17494	1.94744	0.29247	2.09402		295.039	-1	1.10225	0.265192	NaN	2.92904	1.20213		294.973	-1	2.61741	0.710118	1.06449	0.935224	0.91312
295.524	1	0.202399	0.302679	0.384545	1.448	1.10946		295.547	-1	0.446149	1.387	1.16419	0.893519	0.334827		295.685	1	0.602856	1.18115	1.9714	0.280346	2.21456		295.539	-1	1.0139	0.272002	NaN	2.99271	1.21155		295.473	-1	2.59585	0.713675	1.03045	1.0147	1.04008
296.024	1	0.192041	0.294666	0.422723	1.50076	1.05459		296.047	-1	0.426803	1.36509	1.14376	0.880014	0.306168		296.185	1	0.608534	1.17461	2.00742	0.268286	2.33286		296.039	-1	0.926931	0.276624	NaN	3.06177	1.21726		295.973	0	2.64969	0.703971	0.974351	1.02653	1.14537
296.524	1	0.198922	0.291805	0.450119	1.53234	0.998414		296.547	-1	0.413819	1.33786	1.16274	0.878151	0.278309		296.685	1	0.627354	1.15545	2.05537	0.256289	2.44894		296.539	-1	0.842736	0.290017	NaN	3.11887	1.22344		296.473	1	2.71341	0.692434	0.915744	1.03005	1.24762
297.024	1	0.20999	0.290165	0.475041	1.55867	0.942366		297.047	-1	0.401729	1.31262	1.19297	0.878518	0.250523		297.185	1	0.666563	1.14834	2.05276	0.243851	2.51793		297.039	-1	0.760424	0.298816	NaN	3.19136	1.23026		296.973	1	2.7775	0.680163	0.859721	1.03709	1.34831
297.524	1	0.230482	0.287972	0.510116	1.56222	0.935378		297.547	-1	0.393169	1.29522	1.26759	0.887693	0.223021		297.685	1	0.713521	1.1458	2.03094	0.231246	2.56902		297.539	-1	0.682446	0.297038	NaN	3.29925	1.23856		297.473	1	2.81549	0.661676	0.81077	1.03171	1.42689
298.024	1	0.257221	0.269532	0.567373	1.58626	0.910411		298.047	-1	0.388632	1.29251	1.31786	0.901008	0.200382		298.185	1	0.77079	1.11045	2.03074	0.217201	2.65561		298.039	-1	0.62068	0.290096	NaN	3.3756	1.23957		297.973	1	2.80386	0.631379	0.77526	1.00273	1.46346
298.524	1	0.289536	0.236591	0.644426	1.62857	0.869399		298.547	-1	0.389168	1.30832	1.33744	0.919543	0.18387		298.685	1	0.825631	1.07872	2.02846	0.204653	2.75311		298.539	-1	0.574932	0.278053	NaN	3.42079	1.23339		298.473	1	2.90403	0.603792	0.747873	0.974573	1.50721
299.024	1	0.340596	0.205758	0.701589	1.62406	0.843542		299.047	-1	0.388106	1.28529	1.34415	0.897019	0.165669		299.185	1	0.860532	1.08753	2.00114	0.201345	2.88937		299.039	-1	0.549387	0.266202	NaN	3.44928	1.23464		298.973	1	3.0902	0.57829	0.726734	0.94706	1.55647
299.524	1	0.39354	0.175312	0.752411	1.60974	0.817991		299.547	-1	0.386299	1.26089	1.34649	0.859777	0.148535		299.685	1	0.88543	1.10181	1.93192	0.217914	3.11088		299.539	-1	0.531598	0.254425	NaN	3.47135	1.23875		299.473	1	3.46412	0.577626	0.726159	0.906887	1.6088
300.024	1	0.405241	0.143857	0.756955	1.59242	0.733861		300.047	-1	0.38074	1.39947	1.3432	0.792804	0.155655		300.185	1	0.894471	1.12476	1.79627	0.265992	3.46756		300.039	-1	0.514754	0.23985	NaN	3.44601	1.22527		299.973	1	3.88341	0.582963	0.730553	0.863655	1.66187
300.524	1	0.418368	0.123591	0.742731	1.55857	0.655095		300.547	-1	0.367101	1.51367	1.34818	0.724466	0.151887		300.685	1	0.903164	1.15412	1.68702	0.29627	3.74535		300.539	-1	0.498435	0.224312	NaN	3.41064	1.21131		300.473	1	3.99097	0.603213	0.80211	0.779577	1.69116
301.024	1	0.435455	0.134417	0.676347	1.47875	0.591236		301.047	-1	0.33926	1.58499	1.36771	0.653726	0.128979		301.185	1	0.911628	1.1877	1.59511	0.314858	3.97134		301.039	-1	0.486022	0.203851	NaN	3.36244	1.22882		300.973	1	4.03467	0.626396	0.878646	0.691553	1.71323
301.524	1	0.412556	0.141188	0.607335	1.44336	0.616598		301.547	-1	0.315083	1.67128	1.43799	0.601135	0.113326		301.685	1	0.910253	1.19218	1.51053	0.321544	4.11134		301.539	-1	0.45958	0.232193	NaN	3.25049	1.25341		301.473	1	3.80826	0.661644	0.95203	0.599036	1.69827
302.024	1	0.374762	0.145751	0.539118	1.4308	0.695182		302.047	-1	0.294535	1.7724	1.55854	0.566519	0.10486		302.185	1	0.905802	1.18756	1.42824	0.324507	4.22446		302.039	-1	0.400745	0.373228	NaN	2.99137	1.29435		301.973	1	3.47159	0.69343	1.03007	0.518735	1.68107
302.524	1	0.434201	0.150449	0.502058	1.39822	0.836054		302.547	-1	0.27465	1.777	1.65557	0.543811	0.0883017		302.685	1	0.869132	1.17812	1.40063	0.292834	4.04853		302.539	-1	0.352227	0.586522	NaN	2.77606	1.32963		302.473	1	2.92593	0.718654	1.11695	0.461585	1.6596
303.024	1	0.497887	0.153954	0.460989	1.37105	1.00279		303.047	-1	0.255019	1.74453	1.74357	0.525674	0.0686362		303.185	1	0.832184	1.17349	1.37357	0.282553	3.88157		303.039	-1	0.306659	0.819759	NaN	2.57317	1.36325		302.973	1	2.59574	0.740852	1.1445	0.476411	1.62671
303.524	1	0.566053	0.156201	0.415689	1.34959	1.19681		303.547	-1	0.229859	1.76402	1.837	0.513537	0.0872308		303.685	1	0.798349	1.18954	1.34158	0.365963	3.79026		303.539	-1	0.280987	0.95447	NaN	2.41696	1.37157		303.473	1	2.4184	0.760904	1.12995	0.542296	1.58572
304.024	1	0.643908	0.163692	0.401387	1.30914	1.26154		304.047	-1	0.20363	1.79567	1.92595	0.502812	0.113912		304.185	1	0.754907	1.21184	1.31611	0.457766	3.68238		304.039	-1	0.282646	1.0653	NaN	2.30749	1.37334		303.973	0	2.31638	0.761456	1.09522	0.583865	1.54719
304.524	1	0.71477	0.170038	0.386513	1.27304	1.3081		304.547	-1	0.182803	1.86903	1.76764	0.497289	0.133409		304.685	1	0.697539	1.2432	1.30009	0.561738	3.55046		304.539	-1	0.37953	1.09294	NaN	2.3609	1.35229		304.473	0	2.24602	0.753809	1.052	0.61521	1.50969
305.024	1	0.75305	0.170478	0.364227	1.25924	1.29425		305.047	-1	0.171756	1.94474	1.60643	0.49382	0.160227		305.185	1	0.653343	1.2647	1.30922	0.643955	3.43706		305.039	-1	0.501004	1.08055	NaN	2.39747	1.33821		304.973	-1	2.34772	0.755909	0.991561	0.623073	1.40348
305.524	1	0.782536	0.172973	0.342649	1.23405	1.28739		305.547	-1	0.191309	2.02781	1.43614	0.496782	0.209951		305.685	1	0.616885	1.28041	1.33312	0.713395	3.33455		305.539	-1	0.655966	1.01364	NaN	2.4111	1.3336		305.473	-1	2.46778	0.758561	0.934501	0.623563	1.29541
306.024	1	0.799167	0.178471	0.322106	1.19221	1.29074		306.047	-1	0.213762	2.07268	1.40947	0.499227	0.227337		306.185	1	0.553584	1.28645	1.32281	0.712845	3.20568		306.039	-1	0.825124	1.02955	NaN	2.39649	1.32596		305.973	-1	2.70738	0.760887	0.941205	0.537029	1.219
306.524	1	0.807524	0.173023	0.286538	1.1816	1.27828		306.547	-1	0.237837	2.09618	1.46318	0.501384	0.226628		306.685	1	0.487451	1.28937	1.30773	0.698904	3.08079		306.539	-1	1.00533	1.10991	NaN	2.35991	1.31595		306.473	-1	2.9058	0.761122	0.955247	0.46338	1.14453
307.024	1	0.810959	0.161063	0.242031	1.18957	1.25643		307.047	-1	0.286279	2.13364	1.52398	0.507211	0.224269		307.185	1	0.47253	1.27328	1.33698	0.710736	3.12761		307.039	-1	1.12604	1.18588	NaN	2.30252	1.30812		306.973	-1	3.01054	0.756606	0.985981	0.419034	1.07449
307.524	1	0.755538	0.166432	0.192705	1.20442	1.3504		307.547	-1	0.352291	2.17642	1.60705	0.515823	0.219048		307.685	1	0.456277	1.26133	1.37573	0.719986	3.17556		307.539	-1	1.22999	1.26075	NaN	2.23938	1.30091		307.473	-1	3.04145	0.747589	1.05794	0.407659	1.044
308.024	1	0.685561	0.171746	0.142735	1.22229	1.45065		308.047	-1	0.44201	2.20403	1.80132	0.528848	0.202041		308.185	1	0.436541	1.26021	1.43932	0.722485	3.22644		308.039	-1	1.2397	1.3675	NaN	2.17792	1.30449		307.973	-1	3.00574	0.73451	1.16712	0.426042	1.0492
308.524	1	0.596139	0.161014	0.0939273	1.24909	1.47696		308.547	-1	0.533098	2.1943	1.87271	0.540213	0.213252		308.685	1	0.437369	1.26274	1.51136	0.759601	3.29949		308.539	-1	1.22874	1.46887	NaN	2.11852	1.31583		308.473	-1	2.84364	0.722765	1.25173	0.469855	1.05246
309.024	1	0.508295	0.159378	0.0647935	1.25978	1.51536		309.047	-1	0.625256	2.15541	1.84809	0.550281	0.246508		309.185	1	0.458976	1.26896	1.59193	0.831697	3.39492		309.039	-1	1.16521	1.55654	NaN	2.06438	1.34691		308.973	-1	2.63839	0.711475	1.32796	0.522354	1.05505
309.524	1	0.422116	0.167347	0.0564339	1.25345	1.56652		309.547	-1	0.712706	2.10406	1.8365	0.557158	0.314227		309.685	1	0.454081	1.26487	1.62324	0.834051	3.41919		309.539	-1	1.08163	1.65213	NaN	1.99953	1.3637		309.473	-1	2.4689	0.705912	1.41729	0.614345	1.03172
310.024	0	0.374929	0.18969	0.0512235	1.23341	1.50872		310.047	-1	0.79868	2.04879	1.82899	0.563035	0.392758		310.185	1	0.438477	1.25662	1.63465	0.808222	3.41471		310.039	-1	0.978262	1.75551	NaN	1.92412	1.36639		309.973	-1	2.30619	0.699865	1.48905	0.708498	1.00424
310.524	-1	0.354123	0.224301	0.0470134	1.20694	1.41298		310.547	-1	0.843074	1.9023	1.87263	0.567497	0.51681		310.685	1	0.426012	1.24671	1.60359	0.8228	3.42935		310.539	-1	0.9193	1.86159	NaN	1.81273	1.36611		310.473	-1	2.14442	0.676607	1.33959	0.744769	0.984551
311.024	-1	0.392079	0.302311	0.0378951	1.18413	1.45859		311.047	-1	0.872774	1.77756	1.8979	0.571016	0.631107		311.185	1	0.412062	1.24093	1.5727	0.83256	3.43067		311.039	-1	0.877284	1.96869	NaN	1.6876	1.36468		310.973	-1	1.99455	0.64783	1.18591	0.772943	0.964337
311.524	-1	0.418605	0.374419	0.0249886	1.15048	1.48325		311.547	-1	0.886195	1.6804	1.90048	0.573461	0.732937		311.685	1	0.389305	1.25727	1.55699	0.803581	3.35609		311.539	-1	0.855309	2.02285	NaN	1.5872	1.36525		311.473	-1	1.86952	0.607527	1.02344	0.784205	0.943029
312.024	-1	0.410137	0.428462	0.000483402	1.08364	1.4438		312.047	-1	0.886014	1.52516	2.08648	0.580026	0.847207		312.185	1	0.369344	1.28036	1.52508	0.790111	3.29335		312.039	-1	0.838083	2.0752	NaN	1.48937	1.36991		311.973	-1	1.77315	0.579808	0.84931	0.771225	0.926499
312.524	-1	0.416896	0.469918	-0.016571	1.07729	1.45283		312.547	-1	0.873481	1.3299	2.39928	0.588447	0.968815		312.685	1	0.353826	1.31416	1.46742	0.801289	3.24944		312.539	-1	0.842137	2.13586	NaN	1.39804	1.39842		312.473	-1	1.69898	0.561841	0.666142	0.739458	0.91367
313.024	-1	0.428348	0.500131	-0.0268064	1.1117	1.46608		313.047	-1	0.834991	1.21906	2.45181	0.575812	1.0534		313.185	1	0.334146	1.37496	1.60516	0.807877	3.36117		313.039	-1	0.844381	2.18627	NaN	1.3483	1.41804		312.973	-1	1.60665	0.544079	0.586482	0.721277	0.900767
313.524	-1	0.432744	0.485549	-0.00940017	1.27008	1.38323		313.547	-1	0.79242	1.11995	2.50004	0.563651	1.13902		313.685	1	0.31163	1.45174	1.8648	0.81065	3.57034		313.539	-1	0.843445	2.21869	NaN	1.37165	1.42204		313.473	-1	1.50925	0.526373	0.535743	0.706891	0.887842
314.024	-1	0.440293	0.489421	-0.00585076	1.41563	1.328		314.047	-1	0.739509	1.05053	2.53738	0.552694	1.22729		314.185	1	0.283138	1.43567	1.79261	0.769338	3.5332		314.039	-1	0.854682	2.2511	NaN	1.38902	1.41856		313.973	-1	1.43499	0.517337	0.493578	0.681893	0.879382
314.524	-1	0.450458	0.508615	-0.0138047	1.55052	1.29569		314.547	0	0.673338	0.99591	2.47273	0.536035	1.31388		314.685	1	0.255061	1.41996	1.72465	0.733844	3.48999		314.539	-1	0.874671	2.28349	NaN	1.40208	1.40972		314.473	-1	1.36751	0.509332	0.452729	0.657053	0.876701
315.024	-1	0.437584	0.534374	-0.0133484	1.63494	1.25416		315.047	0	0.591724	0.958527	2.28931	0.512735	1.39852		315.185	1	0.228341	1.40545	1.67053	0.717416	3.42686		315.039	-1	0.895068	2.21053	NaN	1.40177	1.40278		314.973	-1	1.32562	0.501945	0.414253	0.63988	0.905479
315.524	-1	0.422387	0.559069	-0.00905812	1.67481	1.20302		315.547	1	0.505478	0.908435	2.16223	0.50195	1.47932		315.685	1	0.209403	1.37447	1.5024	0.702476	3.25423		315.539	-1	0.915076	2.11198	NaN	1.39765	1.39698		315.473	-1	1.31746	0.494635	0.374992	0.597325	0.935897
316.024	-1	0.439528	0.564461	0.000863141	1.55498	1.11413		316.047	1	0.420189	0.859496	2.06862	0.495808	1.55977		316.185	1	0.199936	1.32345	1.19549	0.689348	2.94832		316.039	-1	0.914813	2.02562	NaN	1.37154	1.41957		315.973	-1	1.36831	0.487459	0.334356	0.510383	0.969183
316.524	-1	0.477289	0.56411	0.0456786	1.44085	1.03884		316.547	1	0.345658	0.833487	2.04544	0.492849	1.64401		316.685	1	0.18246	1.30937	0.995168	0.689658	2.85419		316.539	-1	0.913468	1.95398	NaN	1.34297	1.44099		316.473	-1	1.44604	0.4605	0.288736	0.423134	1.06231
317.024	-1	0.53214	0.558998	0.119415	1.33145	0.974821		317.047	1	0.285453	0.833415	1.96093	0.493225	1.73724		317.185	1	0.160956	1.31387	0.84844	0.696724	2.86656		317.039	-1	0.909105	1.92347	NaN	1.30752	1.45916		316.973	-1	1.54182	0.420254	0.239767	0.335679	1.19563
317.524	-1	0.599992	0.524873	0.166799	1.22958	0.931307		317.547	1	0.23257	0.846599	1.84508	0.495305	1.83506		317.685	1	0.144424	1.32655	0.752893	0.701965	2.8376		317.539	-1	0.913405	1.92666	NaN	1.28364	1.45984		317.473	0	1.68278	0.370644	0.20411	0.263478	1.36528
318.024	-1	0.641484	0.503373	0.212303	1.14541	0.892649		318.047	1	0.191251	0.853261	1.77507	0.497078	1.91332		318.185	1	0.127503	1.33883	0.661853	0.706619	2.80289		318.039	-1	0.926951	1.9658	NaN	1.2721	1.44186		317.973	1	1.82898	0.319285	0.171779	0.197885	1.54314
318.524	-1	0.636696	0.505397	0.256134	1.09131	0.861148		318.547	1	0.152297	0.856085	1.7049	0.496675	1.98786		318.685	1	0.103227	1.34087	0.558112	0.708572	2.76275		318.539	-1	0.944658	1.99799	NaN	1.28554	1.40083		318.473	1	1.91777	0.268878	0.151908	0.192658	1.74086
319.024	-1	0.668766	0.527173	0.269175	1.05165	0.865939		319.047	1	0.121863	0.844259	1.63102	0.487735	2.04902		319.185	1	0.0864934	1.34261	0.487847	0.708955	2.69567		319.039	-1	0.965114	2.02561	NaN	1.31548	1.34457		318.973	1	2.00334	0.244874	0.130744	0.191575	1.91947
319.524	-1	0.723959	0.558383	0.281539	1.03394	0.86038		319.547	1	0.0948252	0.82332	1.5959	0.475383	2.09242		319.685	1	0.0841822	1.34378	0.48159	0.706335	2.57707		319.539	0	0.993589	1.99223	NaN	1.34011	1.28621		319.473	1	2.08046	0.28979	0.106206	0.201303	2.04823
320.024	-1	0.824428	0.605704	0.307467	1.06956	0.80811		320.047	1	0.0724349	0.789911	1.61381	0.45836	2.11149		320.185	1	0.0890661	1.3442	0.455594	0.700928	2.47011		320.039	1	1.02392	1.94405	NaN	1.36335	1.22748		319.973	1	2.11798	0.337852	0.0824824	0.200605	2.17242
320.524	-1	0.983175	0.623513	0.354822	1.15917	0.827708		320.547	1	0.0593933	0.758956	1.60808	0.433206	2.12839		320.685	1	0.0993426	1.34407	0.414803	0.693432	2.37187		320.539	1	1.01684	1.94931	NaN	1.3534	1.22028		320.473	1	2.09537	0.390692	0.059995	0.184072	2.2897
321.024	-1	1.15427	0.629893	0.399997	1.26746	0.861301		321.047	1	0.0515695	0.72937	1.58915	0.403514	2.14407		321.185	1	0.1106	1.3645	0.373718	0.683897	2.28911		321.039	1	0.989348	1.99439	NaN	1.34634	1.23097		320.973	1	2.07102	0.472634	0.0512579	0.164781	2.37237
321.524	-1	1.29962	0.630089	0.41076	1.37878	0.85857		321.547	1	0.0444373	0.693824	1.56431	0.382478	2.151		321.685	1	0.122302	1.38841	0.333687	0.674231	2.21108		321.539	1	0.890575	2.1785	NaN	1.34938	1.30416		321.473	1	2.0457	0.571247	0.0503973	0.14391	2.43522
322.024	-1	1.37922	0.62199	0.420152	1.45743	0.863936		322.047	1	0.0375148	0.656658	1.53775	0.363838	2.15553		322.185	1	0.144	1.33272	0.349378	0.683118	2.1768		322.039	1	0.786376	2.39526	NaN	1.34596	1.39282		321.973	1	1.9807	0.620956	0.0540424	0.117361	2.48061
322.524	-1	1.36529	0.602091	0.427593	1.48961	0.880818		322.547	1	0.0382837	0.631111	1.47917	0.346285	2.1725		322.685	1	0.162034	1.27941	0.365987	0.692288	2.14195		322.539	1	0.675893	2.64981	NaN	1.33505	1.49941		322.473	1	1.90306	0.655087	0.0591229	0.0890038	2.52042
323.024	-1	1.32644	0.599891	0.466621	1.50637	0.886859		323.047	1	0.0400951	0.607704	1.42383	0.335486	2.18556		323.185	1	0.168564	1.23362	0.38548	0.702348	2.10531		323.039	1	0.62615	2.85045	NaN	1.2489	1.60425		322.973	1	1.82284	0.690464	0.0723118	0.0671196	2.5446
323.524	-1	1.2742	0.607213	0.522643	1.51483	0.887067		323.547	1	0.0445399	0.589703	1.37672	0.341748	2.18871		323.685	0	0.181947	1.21632	0.395018	0.723519	2.11141		323.539	1	0.619781	3.01259	NaN	1.109	1.70785		323.473	1	1.7407	0.714064	0.0856309	0.0485007	2.57636
324.024	-1	1.23662	0.619599	0.592535	1.51603	0.869967		324.047	1	0.0459373	0.575371	1.30933	0.350872	2.19019		324.185	-1	0.203033	1.23104	0.393366	0.75718	2.16556		324.039	1	0.779279	2.86501	NaN	0.959938	1.83392		323.973	1	1.65169	0.695412	0.0993535	0.0415442	2.63546
324.524	-1	1.21349	0.63258	0.666226	1.52702	0.855543		324.547	1	0.0440676	0.564973	1.2202	0.363066	2.18988		324.685	-1	0.21463	1.26352	0.380624	0.770033	2.20823		324.539	1	0.976059	2.64675	NaN	0.809886	1.96538		324.473	1	1.56527	0.675568	0.110615	0.0360845	2.69254
325.024	-1	1.28692	0.644448	0.75388	1.62321	0.881936		325.047	1	0.0495206	0.55544	1.19809	0.379381	2.21033		325.185	-1	0.219708	1.3082	0.360263	0.768592	2.24303		325.039	1	1.18891	2.3747	NaN	0.682752	2.10658		324.973	1	1.48496	0.652915	0.116067	0.0341578	2.7449
325.524	-1	1.35144	0.656571	0.823138	1.72308	0.900138		325.547	1	0.0590462	0.546387	1.21325	0.397988	2.24232		325.685	-1	0.22521	1.35969	0.332104	0.774815	2.2621		325.539	1	1.37123	2.10846	NaN	0.634758	2.25961		325.473	1	1.41575	0.630785	0.120877	0.0321565	2.79577
326.024	-1	1.36642	0.670106	0.790247	1.84344	0.872856		326.047	1	0.0783394	0.532571	1.25953	0.409902	2.27958		326.185	-1	0.229894	1.41021	0.302736	0.781941	2.27528		326.039	1	1.47635	1.85695	NaN	0.786876	2.44255		325.973	1	1.35685	0.60914	0.12509	0.0300856	2.84526
326.524	-1	1.37805	0.664234	0.784907	1.94363	0.91498		326.547	1	0.100683	0.517266	1.31553	0.419726	2.31847		326.685	-1	0.203183	1.37206	0.295802	0.757252	2.21567		326.539	1	1.50971	1.678	NaN	0.917122	2.59348		326.473	1	1.31153	0.59076	0.130515	0.0201197	2.88003
327.024	-1	1.38717	0.643865	0.80015	2.02876	1.00895		327.047	1	0.126256	0.497367	1.4959	0.42147	2.4948		327.185	-1	0.177374	1.34679	0.283763	0.741342	2.15634		327.039	1	1.4721	1.57081	NaN	1.02574	2.71274		326.973	1	1.27056	0.573425	0.136328	0.00762789	2.9101
327.524	-1	1.33372	0.642883	0.750716	1.94853	0.992713		327.547	1	0.144346	0.478625	1.61803	0.419389	2.64856		327.685	-1	0.154781	1.36742	0.253541	0.756702	2.09794		327.539	1	1.38623	1.45886	NaN	1.12617	2.81199		327.473	1	1.22871	0.559444	0.148718	-0.00112444	2.9459
328.024	-1	1.29283	0.644437	0.704719	1.82699	0.977283		328.047	1	0.141208	0.463434	1.56834	0.407098	2.72988		328.185	-1	0.134658	1.37131	0.23102	0.766416	2.05582		328.039	1	1.27996	1.34489	NaN	1.22316	2.90279		327.973	1	1.18478	0.545789	0.160799	-0.0097038	2.98157
328.524	-1	1.34812	0.646939	0.712433	1.60323	1.02924		328.547	1	0.132704	0.449968	1.48533	0.395845	2.8139		328.685	-1	0.117662	1.35401	0.218245	0.768985	2.03428		328.539	1	1.16935	1.26561	NaN	1.21355	2.96907		328.473	1	1.13343	0.533031	0.171212	-0.0179706	3.01629
329.024	-1	1.38664	0.653412	0.711121	1.38932	1.0605		329.047	1	0.114792	0.439524	1.3439	0.386411	2.90264		329.185	-1	0.116573	1.34144	0.207655	0.775606	2.0058		329.039	1	1.06246	1.18905	NaN	1.19466	3.03163		328.973	1	1.07841	0.518272	0.176803	-0.025187	3.05383
329.524	-1	1.38446	0.669523	0.687904	1.19934	1.04152		329.547	1	0.10152	0.427045	1.1541	0.381187	2.9194		329.685	-1	0.123496	1.33126	0.198164	0.784268	1.97383		329.539	1	0.9799	1.11146	NaN	1.17336	3.08419		329.473	1	1.01621	0.499597	0.172956	-0.0303477	3.09687
330.024	-1	1.4208	0.678388	0.696918	1.05669	1.05862		330.047	1	0.0915693	0.41311	0.929685	0.378977	2.88464		330.185	-1	0.137594	1.34683	0.189415	0.785278	1.92539		330.039	1	0.914943	1.0431	NaN	1.15714	3.1275		329.973	1	0.95351	0.482632	0.172459	-0.0336207	3.12583
330.524	-1	1.49456	0.680211	0.737248	0.960039	1.11076		330.547	1	0.0958053	0.39499	0.877459	0.384641	2.87403		330.685	-1	0.151228	1.36423	0.181461	0.785111	1.87521		330.539	1	0.880831	0.990886	NaN	1.14985	3.1546		330.473	1	0.890443	0.466912	0.174402	-0.0355189	3.14454
331.024	-1	1.47824	0.67862	0.751136	1.03763	1.0808		331.047	1	0.10354	0.375838	0.867692	0.392245	2.86939		331.185	-1	0.154469	1.3714	0.178953	0.783116	1.82725		331.039	1	0.850519	0.93788	NaN	1.1418	3.19319		330.973	1	0.91528	0.462982	0.193042	0.0576276	3.10016
331.524	-1	1.46728	0.677653	0.771046	1.11806	1.05168		331.547	1	0.099883	0.349508	0.886087	0.388403	2.885		331.685	-1	0.156342	1.38158	0.169499	0.786349	1.77741		331.539	1	0.822928	0.884303	NaN	1.13322	3.24002		331.473	1	0.962925	0.462111	0.216013	0.175433	3.03941
332.024	-1	1.48156	0.679257	0.815402	1.20029	1.03001		332.047	1	0.0946422	0.322785	0.902652	0.382521	2.89971		332.185	-1	0.155406	1.39795	0.145777	0.800326	1.72371		332.039	1	0.803062	0.862163	NaN	1.13167	3.29555		331.973	1	1.02053	0.457658	0.234541	0.362402	3.03422
332.524	-1	1.47651	0.691113	0.855637	1.26983	1.00097		332.547	1	0.0867489	0.298749	0.884496	0.370752	2.89245		332.685	-1	0.147242	1.38594	0.135991	0.806138	1.69824		332.539	1	0.784636	0.847197	NaN	1.13158	3.35325		332.473	1	1.07509	0.452228	0.257037	0.549678	3.03092
333.024	-1	1.45404	0.712193	0.892445	1.32751	0.965342		333.047	1	0.0748071	0.284086	0.833501	0.355848	2.8792		333.185	-1	0.132931	1.3498	0.138057	0.805005	1.69678		333.039	1	0.747714	0.810979	NaN	1.12096	3.41209		332.973	1	1.11636	0.443168	0.296045	0.731653	3.02998
333.524	-1	1.4315	0.732075	0.973634	1.31546	0.9381		333.547	1	0.0550828	0.287439	0.719383	0.334917	2.85447		333.685	-1	0.128442	1.34757	0.125287	0.819017	1.65201		333.539	1	0.71475	0.777307	NaN	1.11226	3.46645		333.473	1	1.12775	0.428156	0.327169	0.841463	3.06741
334.024	0	1.38196	0.743985	1.05892	1.29223	0.901294		334.047	1	0.04373	0.293757	0.628402	0.318533	2.82005		334.185	-1	0.12707	1.3561	0.107805	0.837838	1.59348		334.039	1	0.705317	0.758771	NaN	1.11499	3.49423		333.973	1	1.07477	0.400319	0.341303	0.795791	3.1875
334.524	0	1.30392	0.747483	1.14854	1.25721	0.854396		334.547	1	0.0429117	0.303804	0.566539	0.307871	2.77345		334.685	-1	0.126588	1.35002	0.112846	0.841539	1.54651		334.539	1	0.697312	0.730494	NaN	1.11356	3.50333		334.473	0	1.04566	0.370198	0.39871	0.730209	3.28666
335.024	1	1.17898	0.712415	1.22844	1.17566	0.821137		335.047	1	0.0372855	0.313416	0.580113	0.303412	2.7064		335.185	-1	0.127697	1.34497	0.112379	0.84606	1.49449		335.039	1	0.691806	0.685164	NaN	1.10485	3.47973		334.973	0	1.03872	0.337957	0.496286	0.646145	3.3664
335.524	1	1.0614	0.679705	1.29183	1.11338	0.791271		335.547	1	0.0291934	0.322805	0.632377	0.302133	2.62886		335.685	-1	0.135142	1.34577	0.0869153	0.855706	1.42059		335.539	1	0.691146	0.658013	NaN	1.11626	3.47845		335.473	-1	1.0496	0.32936	0.60245	0.557485	3.41508
336.024	1	0.977981	0.66366	1.30681	1.1218	0.768525		336.047	1	0.0300409	0.308356	0.735071	0.311238	2.5614		336.185	-1	0.14259	1.34146	0.0660167	0.862846	1.36236		336.039	1	0.693963	0.643908	NaN	1.14211	3.49316		335.973	-1	1.06762	0.330214	0.712048	0.466988	3.45134
336.524	1	0.914134	0.656929	1.30088	1.1143	0.729199		336.547	1	0.0323076	0.290123	0.845771	0.321991	2.49555		336.685	-1	0.150042	1.33094	0.0506615	0.866944	1.32315		336.539	1	0.656703	0.639464	NaN	1.14339	3.46709		336.473	-1	1.0813	0.361175	0.809496	0.470958	3.4144
337.024	1	0.865236	0.657311	1.27899	1.09465	0.677212		337.047	1	0.0280347	0.290124	0.961064	0.332135	2.43814		337.185	-1	0.150719	1.3236	0.0385465	0.870822	1.28945		337.039	1	0.609829	0.637197	NaN	1.13874	3.43313		336.973	-1	1.09413	0.398145	0.904519	0.493786	3.36285
337.524	0	0.837963	0.666527	1.26499	1.12973	0.653451		337.547	1	0.0245872	0.285723	1.06952	0.343468	2.37482		337.685	-1	0.147896	1.31791	0.0281067	0.874585	1.25861		337.539	1	0.57108	0.627051	NaN	1.13744	3.48726		337.473	-1	1.05807	0.455029	0.920088	0.543305	3.20432
338.024	0	0.819661	0.679408	1.25426	1.18752	0.641399		338.047	1	0.0244392	0.264768	1.15378	0.358997	2.29029		338.185	-1	0.150769	1.31482	0.0279379	0.883315	1.22796		338.039	1	0.530212	0.624711	NaN	1.13228	3.5238		337.973	-1	1.07596	0.511241	0.923469	0.585778	3.04924
338.524	-1	0.762391	0.650802	1.26067	1.10264	0.616714		338.547	1	0.0232019	0.247343	1.23949	0.374493	2.19993		338.685	-1	0.154455	1.31211	0.0292337	0.892753	1.19734		338.539	1	0.481983	0.649475	NaN	1.11367	3.49929		338.473	-1	1.32821	0.560613	0.892306	0.59351	2.93018
339.024	-1	0.734476	0.629849	1.26398	1.09935	0.602003		339.047	1	0.0205871	0.23438	1.32707	0.389944	2.10219		339.185	-1	0.143498	1.31307	0.0327221	0.897372	1.16868		339.039	1	0.474713	0.650303	NaN	1.10728	3.55701		338.973	-1	1.65998	0.598067	0.878719	0.609984	2.81704
339.524	-1	0.750461	0.623885	1.26119	1.22196	0.602139		339.547	1	0.0142883	0.216989	1.35657	0.413512	2.01826		339.685	-1	0.133762	1.31452	0.0351289	0.902091	1.14132		339.539	1	0.518858	0.621084	NaN	1.11623	3.71797		339.473	-1	2.09552	0.619967	0.88807	0.637869	2.7116
340.024	-1	0.848547	0.667527	1.25831	1.3509	0.61745		340.047	1	0.00611519	0.197345	1.35652	0.441208	1.94136		340.185	-1	0.12856	1.31758	0.0337041	0.907237	1.11848		340.039	1	0.539467	0.612622	NaN	1.14117	3.68304		339.973	-1	2.59084	0.645272	0.913578	0.646053	2.63547
340.524	-1	0.959178	0.711411	1.2522	1.51407	0.632472		340.547	1	0.000507777	0.1963	1.29551	0.45221	1.88926		340.685	-1	0.127691	1.31935	0.0347309	0.911181	1.09902		340.539	1	0.549162	0.613785	NaN	1.17353	3.55728		340.473	-1	3.11785	0.672382	0.947649	0.643797	2.57488
341.024	-1	1.0539	0.720721	1.23514	1.78916	0.635684		341.047	1	-0.00438524	0.200435	1.21752	0.458563	1.84406		341.185	-1	0.132255	1.31949	0.0388327	0.913618	1.08379		341.039	1	0.562987	0.547075	NaN	1.1982	3.49335		340.973	-1	3.39288	0.679223	0.990571	0.698222	2.50585
341.524	-1	1.11317	0.730193	1.20004	1.95681	0.643398		341.547	1	0.0271094	0.213151	1.09824	0.472452	1.85219		341.685	-1	0.140846	1.31613	0.0481729	0.916527	1.06175		341.539	1	0.57711	0.473445	NaN	1.22216	3.43592		341.473	-1	3.63091	0.683089	1.03479	0.760967	2.43557
342.024	-1	1.1531	0.739755	1.15509	2.06584	0.65357		342.047	1	0.0554551	0.223929	0.997555	0.478525	1.84003		342.185	-1	0.151501	1.31095	0.0601995	0.919678	1.03622		342.039	1	0.546001	0.504808	NaN	1.2821	3.34165		341.973	-1	3.58145	0.673036	1.05001	0.822862	2.35704
342.524	-1	1.25115	0.697841	1.11843	2.18231	0.648577		342.547	1	0.0688674	0.226505	0.972769	0.453406	1.74448		342.685	-1	0.147829	1.30097	0.0677304	0.920131	1.00712		342.539	1	0.514496	0.552527	NaN	1.34273	3.24874		342.473	-1	3.49773	0.661496	1.06257	0.87378	2.27744
343.024	-1	1.33701	0.662896	1.08516	2.28467	0.642884		343.047	1	0.0794681	0.229961	0.961327	0.433204	1.6521		343.185	-1	0.140897	1.29114	0.0739449	0.919626	0.977223		343.039	1	0.481431	0.664462	NaN	1.40605	3.1612		342.973	-1	3.29479	0.644813	1.06604	0.884397	2.19413
343.524	-1	1.35557	0.670974	1.06459	2.32389	0.637911		343.547	1	0.0862461	0.234613	0.968029	0.419687	1.56402		343.685	-1	0.12155	1.28813	0.0736529	0.913727	0.944297		343.539	0	0.457589	0.758556	NaN	1.48232	3.14607		343.473	-1	3.0534	0.63257	1.06324	0.889329	2.11604
344.024	-1	1.39562	0.672031	1.0809	2.26101	0.626928		344.047	1	0.0744286	0.238293	0.963771	0.411922	1.43182		344.185	-1	0.102778	1.28581	0.0709233	0.906845	0.918992		344.039	0	0.445296	0.830308	NaN	1.57482	3.22162		343.973	-1	2.76168	0.626141	1.0522	0.886815	2.04479
344.524	-1	1.46695	0.662869	1.15093	2.04951	0.607195		344.547	1	0.0469228	0.241154	0.950264	0.409011	1.26238		344.685	-1	0.0851593	1.28484	0.0633028	0.897986	0.908979		344.539	-1	0.450194	0.828959	NaN	1.64029	3.14129		344.473	-1	2.53357	0.633097	1.0556	0.877491	1.98785
345.024	-1	1.46236	0.638074	1.22994	1.82352	0.57508		345.047	1	0.0359135	0.252575	0.918699	0.42153	1.20295		345.185	-1	0.0721471	1.28521	0.0607357	0.890771	0.896128		345.039	-1	0.468437	0.770867	NaN	1.68477	2.93997		344.973	-1	2.34212	0.647769	1.06732	0.864243	1.93917
345.524	-1	1.40865	0.603167	1.31476	1.58817	0.534954		345.547	1	0.0300227	0.266651	0.881531	0.438837	1.17765		345.685	-1	0.0649741	1.28726	0.0645742	0.885639	0.879678		345.539	-1	0.527655	0.607158	NaN	1.78108	2.97777		345.473	-1	2.19955	0.666516	1.05991	0.862367	1.89384
346.024	-1	1.40216	0.613988	1.41702	1.31286	0.558485		346.047	1	0.0326551	0.278332	0.863024	0.445289	1.19872		346.185	-1	0.0528037	1.29	0.0642214	0.882406	0.860447		346.039	-1	0.594079	0.440425	NaN	1.87108	3.05503		345.973	-1	2.06398	0.685848	1.04976	0.862123	1.849
346.524	-1	1.41249	0.628289	1.5172	1.08308	0.591549		346.547	1	0.0367281	0.289067	0.848675	0.44881	1.22908		346.685	-1	0.0366456	1.29329	0.0605242	0.880689	0.838997		346.539	-1	0.670366	0.47796	NaN	1.74573	3.15175		346.473	-1	1.95692	0.706684	1.01875	0.858482	1.79945
347.024	-1	1.44137	0.616957	1.59601	1.04108	0.604896		347.047	1	0.0418305	0.293477	0.847783	0.438772	1.28116		347.185	-1	0.0242475	1.29468	0.0748549	0.879655	0.804449		347.039	-1	0.716904	0.535181	NaN	1.6118	3.22895		346.973	-1	1.86131	0.727457	0.983591	0.855312	1.74816
347.524	-1	1.39503	0.639898	1.60463	0.960302	0.657171		347.547	1	0.0487796	0.297131	0.852429	0.42747	1.31483		347.685	-1	0.0129618	1.29548	0.0944315	0.878815	0.766126		347.539	-1	0.688439	0.642028	NaN	1.45625	3.25694		347.473	-1	1.80421	0.747979	0.934732	0.85383	1.69104
348.024	0	1.30412	0.682961	1.57188	0.856826	0.732387		348.047	1	0.0599728	0.299051	0.869804	0.413259	1.30618		348.185	-1	0.00614258	1.27742	0.0990252	0.875905	0.75322		348.039	-1	0.640735	0.774101	NaN	1.26353	3.24379		347.973	-1	1.7428	0.768251	0.89247	0.868451	1.64321
348.524	0	1.23529	0.688959	1.59148	0.803565	0.777848		348.547	1	0.0775489	0.316959	0.882846	0.398375	1.28081		348.685	-1	0.00052528	1.25828	0.105285	0.875125	0.739595		348.539	-1	0.561534	0.947468	NaN	1.00994	3.16328		348.473	-1	1.67557	0.788188	0.859085	0.904732	1.60788
349.024	1	1.13104	0.696095	1.5642	0.742946	0.857231		349.047	1	0.100497	0.348325	0.89224	0.382922	1.24136		349.185	-1	-0.000830759	1.23536	0.117454	0.881898	0.723414		349.039	-1	0.515073	1.03273	NaN	0.883849	2.94131		348.973	-1	1.67328	0.804492	0.829259	0.932088	1.56068
349.524	1	0.989455	0.704432	1.48754	0.674574	0.972345		349.547	0	0.140218	0.396695	0.862017	0.371195	1.20294		349.685	-1	-0.00161349	1.21408	0.118947	0.885662	0.712509		349.539	-1	0.490075	1.06022	NaN	0.841345	2.62659		349.473	-1	1.7068	0.818793	0.801396	0.954521	1.50693
350.024	1	0.892138	0.696107	1.44971	0.622818	1.10296		350.047	0	0.185723	0.450929	0.818136	0.360752	1.16488		350.185	-1	-0.00164182	1.19497	0.106394	0.885465	0.708545		350.039	-1	0.540539	1.07806	NaN	0.836712	2.48076		349.973	-1	1.49097	0.848214	0.771689	1.12364	1.47312
350.524	1	0.823699	0.676913	1.43721	0.581901	1.24367		350.547	-1	0.252081	0.551534	0.748521	0.343513	1.11435		350.685	-1	0.00605876	1.18653	0.0965943	0.891486	0.695666		350.539	-1	0.610192	1.09319	NaN	0.840129	2.37254		350.473	-1	1.24025	0.880631	0.741937	1.305	1.44246
351.024	1	0.750184	0.638373	1.3745	0.559794	1.3608		351.047	-1	0.319086	0.658099	0.677082	0.325999	1.06263		351.185	-1	0.0178159	1.18369	0.0882406	0.90077	0.678108		351.039	-1	0.746748	1.09414	NaN	0.842458	2.29719		350.973	-1	1.02519	0.920209	0.714688	1.37762	1.41264
351.524	1	0.675604	0.595774	1.30126	0.541632	1.47298		351.547	-1	0.385457	0.783552	0.601814	0.308403	1.00764		351.685	-1	0.0230821	1.18474	0.0745905	0.903264	0.665942		351.539	-1	0.869091	1.09561	NaN	0.847104	2.22284		351.473	-1	0.783128	0.960419	0.689591	1.44461	1.3923
352.024	1	0.565013	0.57161	1.25807	0.538992	1.61313		352.047	-1	0.453156	0.90407	0.553058	0.292502	0.958888		352.185	0	0.0273745	1.18575	0.0604284	0.905621	0.654265		352.039	-1	0.951811	1.09851	NaN	0.85821	2.1513		351.973	-1	0.485309	1.00193	0.668942	1.5	1.39154
352.524	1	0.458086	0.551559	1.21179	0.540482	1.74869		352.547	-1	0.522859	1.01714	0.544303	0.279159	0.919551		352.685	0	0.0309869	1.18154	0.0482095	0.915051	0.640313		352.539	-1	1.05074	1.09395	NaN	0.866157	2.0741		352.473	-1	0.340903	1.02787	0.650737	1.45261	1.3715
353.024	1	0.360475	0.536534	1.1577	0.547299	1.87417		353.047	-1	0.636298	1.10639	0.559496	0.273466	0.871194		353.185	1	0.0310741	1.17794	0.0382397	0.919885	0.627061		353.039	-1	1.17567	1.07742	NaN	0.869039	1.98783		352.973	-1	0.324266	1.04084	0.634568	1.31962	1.33539
353.524	1	0.257207	0.526683	1.12515	0.528595	2.02467		353.547	-1	0.779608	1.17936	0.591044	0.272997	0.816678		353.685	1	0.0234383	1.17568	0.0331973	0.914653	0.615342		353.539	-1	1.2746	1.07176	NaN	0.862708	1.91621		353.473	-1	0.307291	1.04133	0.624218	1.2571	1.30223
354.024	1	0.157556	0.516009	1.09909	0.501943	2.16871		354.047	-1	0.966285	1.22519	0.640896	0.288527	0.766386		354.185	1	0.0166001	1.17239	0.0295187	0.909354	0.604413		354.039	-1	1.35786	1.07265	NaN	0.850825	1.85342		353.973	-1	0.290223	1.03842	0.615455	1.21379	1.26987
354.524	1	0.0817474	0.494873	1.07484	0.472012	2.25079		354.547	-1	1.17141	1.25948	0.698533	0.310861	0.717891		354.685	1	0.0105602	1.16807	0.027205	0.903988	0.594274		354.539	-1	1.38828	1.15109	NaN	0.906581	1.77514		354.473	-1	0.298109	1.02896	0.609967	1.18421	1.24072
355.024	1	0.0362062	0.47244	1.0605	0.463712	2.34471		355.047	-1	1.37277	1.29811	0.749732	0.318714	0.668514		355.185	1	0.00610298	1.1634	0.0305655	0.89799	0.584532		355.039	-1	1.40557	1.24729	NaN	0.974427	1.69189		354.973	-1	0.307599	1.0206	0.608235	1.15677	1.21973
355.524	1	0.0126547	0.449067	1.05336	0.471127	2.44723		355.547	-1	1.55171	1.33635	0.793152	0.32576	0.623096		355.685	1	0.00229542	1.15857	0.036255	0.891734	0.574952		355.539	-1	1.37342	1.39403	NaN	1.03589	1.57765		355.473	-1	0.32192	1.01684	0.620737	1.13686	1.22989
356.024	1	0.0137295	0.433692	1.02847	0.473532	2.49751		356.047	-1	1.59736	1.37006	0.792907	0.335268	0.60201		356.185	1	-0.000515269	1.15339	0.0351883	0.888574	0.567333		356.039	-1	1.33502	1.53592	NaN	1.08922	1.46375		355.973	-1	0.327654	1.01501	0.6371	1.12144	1.2425
356.524	1	0.0152318	0.419961	1.00371	0.475572	2.55088		356.547	-1	1.63086	1.40837	0.789222	0.343825	0.581688		356.685	1	-0.00338562	1.14831	0.0340036	0.886131	0.560618		356.539	-1	1.28087	1.66555	NaN	1.12203	1.35071		356.473	-1	0.313929	1.01752	0.662214	1.11621	1.2607
357.024	1	0.0158685	0.41957	0.983507	0.475254	2.64219		357.047	-1	1.62664	1.46097	0.774844	0.349426	0.563735		357.185	1	-0.00703988	1.14401	0.0350068	0.886647	0.558473		357.039	-1	1.23722	1.72548	NaN	1.11196	1.2809		356.973	-1	0.301617	1.01834	0.689372	1.11401	1.27107
357.524	1	0.010459	0.418276	0.959144	0.470585	2.71556		357.547	-1	1.61648	1.50346	0.778929	0.355519	0.550144		357.685	1	-0.00998112	1.1415	0.0338367	0.885867	0.557432		357.539	-1	1.20478	1.71105	NaN	1.05616	1.25722		357.473	-1	0.290577	1.01764	0.718368	1.11454	1.27442
358.024	1	-0.00782227	0.415058	0.925924	0.45665	2.75074		358.047	-1	1.59885	1.53323	0.806209	0.36223	0.54203		358.185	1	-0.0117083	1.14202	0.0289661	0.882877	0.558274		358.039	-1	1.15338	1.64973	NaN	1.00046	1.27149		357.973	-1	0.279801	1.00937	0.734421	1.05499	1.255
358.524	1	-0.0122346	0.407081	0.892084	0.439001	2.77421		358.547	-1	1.59248	1.57534	0.836903	0.374004	0.533652		358.685	1	-0.0134229	1.14287	0.0237346	0.881256	0.558587		358.539	-1	1.08953	1.55761	NaN	0.944828	1.31069		358.473	-1	0.269171	0.996958	0.743381	0.962512	1.22308
359.024	1	-0.00476588	0.395029	0.857714	0.418172	2.78764		359.047	-1	1.59184	1.62372	0.869333	0.388354	0.525138		359.185	0	-0.0150776	1.14524	0.0167875	0.886144	0.556388		359.039	-1	1.03414	1.48394	NaN	0.945981	1.33383		358.973	-1	0.309603	0.986646	0.72892	0.880437	1.17529
359.524	1	0.020997	0.36895	0.840636	0.442748	2.75941		359.547	-1	1.59912	1.67931	1.21689	0.399406	0.519826		359.685	0	-0.0116578	1.14876	0.00979583	0.88935	0.554082		359.539	-1	0.980567	1.41423	NaN	0.95928	1.35353		359.473	-1	0.360949	0.977074	0.709854	0.799825	1.12681
360.024	1	0.0505451	0.342546	0.828158	0.472578	2.72721		360.047	-1	1.59928	1.73651	1.57808	0.408751	0.510242		360.185	-1	-0.000504681	1.15404	0.00273627	0.88999	0.551615		360.039	-1	0.936322	1.35046	NaN	0.962644	1.32274		359.973	-1	0.455495	0.973445	0.676708	0.717124	1.10374
360.524	1	0.0887717	0.319927	0.828028	0.507173	2.69413		360.547	-1	1.52825	1.79946	1.69518	0.406998	0.459682		360.685	-1	0.0131571	1.16085	0.0122374	0.912339	0.551723		360.539	-1	0.900188	1.29809	NaN	0.978542	1.28487		360.473	-1	0.543639	0.969575	0.642569	0.669322	1.09219
361.024	1	0.126568	0.302704	0.830565	0.543551	2.70064		361.047	-1	1.4579	1.8521	1.82934	0.404773	0.407858		361.185	-1	0.0283163	1.16857	0.0316242	0.947646	0.553367		361.039	-1	0.898472	1.29532	NaN	1.05168	1.22395		360.973	-1	0.615815	0.965101	0.605953	0.70856	1.10938
361.524	1	0.163944	0.290738	0.835702	0.581667	2.74574		361.547	-1	1.39013	1.86426	2.03048	0.400695	0.351072		361.685	-1	0.0426422	1.17718	0.0418496	0.973293	0.55054		361.539	-1	0.909911	1.279	NaN	1.13707	1.16653		361.473	-1	0.679576	0.969764	0.584857	0.726405	1.12421
362.024	1	0.196349	0.283415	0.82175	0.546248	2.8021		362.047	0	1.32965	1.86024	2.09794	0.398088	0.295899		362.185	-1	0.056739	1.18571	0.051393	0.997539	0.547022		362.039	-1	0.940773	1.2427	NaN	1.24056	1.11428		361.973	-1	0.735135	0.983335	0.57889	0.723398	1.13674
362.524	1	0.228426	0.277004	0.803647	0.507393	2.86079		362.547	0	1.27912	1.83412	1.98274	0.39749	0.242929		362.685	-1	0.0696983	1.19124	0.0719766	1.02469	0.544324		362.539	-1	1.0038	1.24849	NaN	1.3522	1.06838		362.473	-1	0.95775	1.00569	0.606381	0.727133	1.13889
363.024	1	0.265427	0.270228	0.784245	0.551261	2.9194		363.047	1	1.26457	1.78349	1.95898	0.408839	0.208559		363.185	-1	0.0793469	1.19615	0.0853282	1.0443	0.539311		363.039	-1	1.08793	1.28187	NaN	1.4692	1.02663		362.973	-1	1.31916	1.03535	0.661671	0.736469	1.13243
363.524	1	0.292829	0.262939	0.760865	0.591293	2.97182		363.547	1	1.27	1.71926	1.98594	0.426817	0.184507		363.685	-1	0.0810222	1.19959	0.0812629	1.0457	0.528721		363.539	-1	1.11767	1.33094	NaN	1.43493	0.992861		363.473	-1	1.78714	1.06185	0.792454	0.777666	1.13131
364.024	1	0.300385	0.25459	0.729263	0.623393	3.01146		364.047	1	1.2802	1.66135	1.90124	0.431047	0.162531		364.185	-1	0.0900909	1.19948	0.0765094	1.05	0.522848		364.039	-1	1.13301	1.38637	NaN	1.35899	0.961158		363.973	-1	2.30851	1.08677	0.961062	0.834827	1.13289
364.524	1	0.315057	0.248018	0.7087	0.691531	3.03484		364.547	1	1.2919	1.60541	1.78174	0.430992	0.141201		364.685	-1	0.10605	1.19607	0.0711146	1.05699	0.521372		364.539	-1	1.12454	1.49722	NaN	1.18065	0.931914		364.473	-1	2.76325	1.09156	1.11916	0.934903	1.14167
365.024	1	0.335618	0.242917	0.697274	0.78949	3.04477		365.047	1	1.25642	1.52394	1.58807	0.427707	0.106413		365.185	-1	0.123556	1.18976	0.0694851	1.05964	0.51744		365.039	-1	1.11598	1.58589	NaN	1.00785	0.88981		364.973	-1	3.19786	1.09081	1.27407	1.04642	1.15174
365.524	1	0.334029	0.237705	0.693977	0.795904	3.07138		365.547	1	1.21749	1.44123	1.39339	0.423745	0.0732647		365.685	-1	0.141624	1.18239	0.0692257	1.06072	0.512613		365.539	-1	1.10724	1.61874	NaN	0.849039	0.815347		365.473	-1	3.21109	1.07209	1.35928	1.11356	1.0206
366.024	1	0.329886	0.232137	0.692003	0.785325	3.09794		366.047	1	1.22241	1.3893	1.31649	0.417894	0.0817078		366.185	-1	0.183758	1.17337	0.0684068	1.05727	0.515076		366.039	-1	1.09513	1.65135	NaN	0.744628	0.758155		365.973	-1	3.15743	1.0588	1.41943	1.15447	0.888327
366.524	1	0.334188	0.224629	0.689161	0.772399	3.10664		366.547	1	1.23609	1.32877	1.29511	0.450886	0.109758		366.685	-1	0.22692	1.16454	0.0678784	1.05326	0.517724		366.539	-1	1.07995	1.68372	NaN	0.689596	0.716637		366.473	-1	2.89698	1.06227	1.4021	1.11427	0.752537
367.024	1	0.320179	0.215115	0.683331	0.764805	3.14298		367.047	1	1.27001	1.24842	1.40193	0.57357	0.183081		367.185	-1	0.264586	1.16029	0.072474	1.04452	0.51672		367.039	-1	1.04278	1.73328	NaN	0.679903	0.719393		366.973	-1	2.66602	1.05581	1.37266	1.05353	0.60733
367.524	1	0.294479	0.204405	0.675548	0.759685	3.19791		367.547	1	1.31919	1.17429	1.57113	0.689165	0.251538		367.685	-1	0.301187	1.15696	0.0728088	1.03816	0.516891		367.539	-1	0.998024	1.78876	NaN	0.685825	0.737399		367.473	-1	2.46644	1.0388	1.33033	0.970928	0.452099
368.024	1	0.285065	0.196664	0.669814	0.736882	3.2414		368.047	1	1.39095	1.10937	1.83259	0.794275	0.312799		368.185	-1	0.335067	1.15601	0.0622522	1.03786	0.520063		368.039	-1	0.917005	1.84285	NaN	0.695247	0.807263		367.973	-1	2.3071	1.02246	1.27305	0.887949	0.357292
368.524	1	0.29623	0.194006	0.666817	0.721243	3.26627		368.547	0	1.45665	1.05363	2.09454	0.893844	0.359168		368.685	-1	0.351635	1.15569	0.0590964	1.03652	0.522888		368.539	-1	0.826091	1.89647	NaN	0.705817	0.891488		368.473	-1	2.17632	1.00659	1.20516	0.804705	0.305386
369.024	1	0.342799	0.20009	0.66853	0.717925	3.25909		369.047	0	1.51867	1.00345	2.35677	0.990055	0.39651		369.185	-1	0.350946	1.15599	0.0633176	1.03414	0.525368		369.039	-1	0.780154	1.92206	NaN	0.772466	0.977565		368.973	-1	2.13505	0.9872	1.13293	0.746672	0.23565
369.524	1	0.393437	0.205124	0.660834	0.719687	3.26238		369.547	-1	1.54649	0.997779	2.53728	1.00282	0.383614		369.685	-1	0.342034	1.15612	0.06162	1.03833	0.534069		369.539	-1	0.738057	1.9427	NaN	0.840219	1.05847		369.473	-1	2.11574	0.967613	1.06045	0.696006	0.16255
370.024	1	0.445183	0.209866	0.650314	0.722972	3.26894		370.047	-1	1.56789	1.00045	2.70248	0.999959	0.361305		370.185	-1	0.329681	1.15617	0.0574459	1.04526	0.545373		370.039	-1	0.728892	1.9209	NaN	0.917449	1.09502		369.973	-1	2.10486	0.976429	1.02243	0.698349	0.131027
370.524	1	0.497396	0.214349	0.629354	0.731866	3.29158		370.547	-1	1.57451	1.03054	2.73937	1.02439	0.336048		370.685	-1	0.324362	1.15395	0.0589117	1.04647	0.554886		370.539	-1	0.723103	1.92128	NaN	0.97977	1.12115		370.473	-1	2.07528	0.984694	0.990448	0.711769	0.104477
371.024	1	0.532628	0.213441	0.612885	0.742852	3.32216		371.047	-1	1.57698	1.0622	2.76634	1.0506	0.310484		371.185	-1	0.320031	1.15152	0.060067	1.04723	0.564082		371.039	-1	0.724373	1.96802	NaN	1.01093	1.12551		370.973	-1	1.98097	0.991048	0.979345	0.763513	0.0951303
371.524	1	0.533003	0.201471	0.605637	0.758134	3.36902		371.547	-1	1.55961	1.09334	2.77995	1.07765	0.28413		371.685	-1	0.3226	1.14883	0.0467283	1.04893	0.570324		371.539	-1	0.729251	1.92226	NaN	1.0085	1.10347		371.473	-1	1.90501	1.00118	0.963429	0.791648	0.0894976
372.024	1	0.537461	0.185689	0.622067	0.761343	3.40569		372.047	-1	1.5421	1.13247	2.74451	1.08579	0.274369		372.185	-1	0.332849	1.1441	0.0213857	1.04323	0.584053		372.039	-1	0.737029	1.80215	NaN	0.979091	1.06021		371.973	-1	1.85193	1.01604	0.941506	0.790312	0.0885004
372.524	1	0.543303	0.168616	0.646524	0.760459	3.43889		372.547	-1	1.52433	1.18558	2.62327	1.06085	0.293625		372.685	-1	0.363406	1.13396	-0.0356991	1.01791	0.617577		372.539	-1	0.749022	1.75679	NaN	0.962845	0.999994		372.473	-1	1.83426	1.02442	0.920968	0.779386	0.0692337
373.024	1	0.513022	0.175551	0.654231	0.776054	3.41029		373.047	-1	1.52867	1.21037	2.56197	1.02122	0.3067		373.185	-1	0.381451	1.10681	-0.0565	0.994986	0.628049		373.039	-1	0.763393	1.75362	NaN	0.954031	0.930209		372.973	-1	1.83285	1.02982	0.901066	0.764051	0.0415657
373.524	1	0.478274	0.182938	0.658818	0.787968	3.37806		373.547	-1	1.54874	1.21501	2.54333	0.971137	0.315374		373.685	-1	0.386763	1.06237	-0.0403727	0.974495	0.61506		373.539	-1	0.747011	1.73381	NaN	0.964405	0.861402		373.473	-1	1.95574	1.04313	0.912701	0.722813	0.0203106
374.024	1	0.429396	0.18875	0.652279	0.781396	3.33913		374.047	0	1.53939	1.19212	2.66462	0.916307	0.320778		374.185	-1	0.39627	1.0328	-0.0414368	0.95661	0.59896		374.039	-1	0.727631	1.72224	NaN	0.97904	0.796263		373.973	-1	2.10534	1.05741	0.934523	0.678274	0.000480535
374.524	1	0.383398	0.199238	0.629289	0.775283	3.2941		374.547	1	1.52443	1.15008	2.85806	0.866418	0.316013		374.685	0	0.407473	1.00925	-0.0494547	0.93978	0.5816		374.539	-1	0.729087	1.83089	NaN	1.00709	0.769934		374.473	-1	2.17648	1.05096	1.01015	0.699074	-0.0223849
375.024	1	0.341264	0.215996	0.584239	0.769784	3.24089		375.047	1	1.54456	1.06967	3.11757	0.852112	0.266276		375.185	1	0.389402	0.978314	0.00944637	0.949504	0.539902		375.039	-1	0.725314	1.91057	NaN	1.03546	0.747185		374.973	-1	2.23173	1.04211	1.08746	0.752055	-0.039782
375.524	1	0.320955	0.210939	0.55716	0.743842	3.20278		375.547	1	1.53726	0.995839	3.32255	0.846308	0.234582		375.685	1	0.370002	0.953015	0.0650779	0.959911	0.502026		375.539	-1	0.698263	1.8612	NaN	1.06524	0.740376		375.473	-1	2.20667	1.02108	1.17333	0.967652	-0.0295467
376.024	1	0.307244	0.203573	0.535342	0.717683	3.18073		376.047	1	1.48572	0.932615	3.43953	0.854224	0.232002		376.185	1	0.356672	0.965133	0.0688969	0.96166	0.498832		376.039	-1	0.673435	1.8085	NaN	1.11415	0.737629		375.973	-1	2.109	0.994675	1.24262	1.2472	-0.0208937
376.524	1	0.30249	0.196036	0.520548	0.695353	3.18843		376.547	1	1.37426	0.890582	3.59188	0.906121	0.24484		376.685	1	0.342226	0.97427	0.0768403	0.960824	0.497185		376.539	-1	0.651639	1.75125	NaN	1.18913	0.740423		376.473	-1	1.9043	0.960345	1.28748	1.62101	-0.0145732
377.024	1	0.29184	0.187495	0.512822	0.681127	3.19013		377.047	0	1.2216	0.875479	3.73233	0.996561	0.285875		377.185	1	0.325855	0.978263	0.0918973	0.955528	0.498207		377.039	-1	0.610399	1.72692	NaN	1.3028	0.727138		376.973	-1	1.68472	0.926627	1.29835	2.00576	-0.000210479
377.524	1	0.273912	0.177716	0.513816	0.676904	3.18442		377.547	0	1.05403	0.972088	3.56947	1.16939	0.482299		377.685	1	0.31255	0.999892	0.108033	0.949072	0.504457		377.539	-1	0.558409	1.7208	NaN	1.43784	0.704966		377.473	-1	1.45621	0.893277	1.28881	2.39709	0.0189816
378.024	1	0.268329	0.163015	0.511995	0.68162	3.18385		378.047	-1	0.886128	1.04288	3.45186	1.24302	0.623027		378.185	1	0.301447	1.03418	0.124943	0.941783	0.514458		378.039	-1	0.503609	1.72505	NaN	1.5139	0.674628		377.973	-1	1.33086	0.90626	1.30047	2.52078	0.0456167
378.524	1	0.265252	0.148937	0.508965	0.672565	3.17973		378.547	-1	0.717998	1.09513	3.36675	1.2454	0.723753		378.685	1	0.284826	1.05177	0.13413	0.954139	0.515373		378.539	-1	0.449536	1.73107	NaN	1.57504	0.643809		378.473	-1	1.23276	0.926436	1.31672	2.58519	0.0766171
379.024	1	0.25845	0.141279	0.504845	0.613442	3.16012		379.047	0	0.656571	1.13446	3.07171	1.19382	0.795017		379.185	1	0.266837	1.06486	0.141394	0.971576	0.514217		379.039	-1	0.408212	1.73851	NaN	1.57586	0.621848		378.973	-1	1.23763	0.946026	1.34481	2.48827	0.137337
379.524	1	0.283063	0.143566	0.504432	0.551839	3.14706		379.547	1	0.610957	1.16303	2.79044	1.12194	0.846379		379.685	1	0.247092	1.06123	0.145928	1.0017	0.515665		379.539	-1	0.375915	1.73896	NaN	1.56219	0.610991		379.473	-1	1.24461	0.96621	1.36476	2.37311	0.190829
380.024	1	0.319142	0.149997	0.505424	0.489511	3.13621		380.047	1	0.580924	1.11263	2.87026	0.934811	0.757857		380.185	1	0.229356	1.05382	0.146921	1.02473	0.511246		380.039	-1	0.364483	1.72324	NaN	1.51502	0.625797		379.973	-1	1.25614	0.987675	1.36713	2.2186	0.228719
380.524	1	0.344749	0.172062	0.507072	0.434645	3.11686		380.547	1	0.589974	1.10154	2.94424	0.812022	0.706413		380.685	1	0.217875	1.03463	0.136891	1.02568	0.488568		380.539	-1	0.356705	1.71413	NaN	1.49357	0.649356		380.473	-1	1.30605	0.988324	1.34344	2.10561	0.256313
381.024	1	0.384148	0.197698	0.507391	0.41631	3.10748		381.047	1	0.62841	1.11684	3.03008	0.744325	0.683976		381.185	1	0.2059	1.0253	0.114865	1.0212	0.472346		381.039	-1	0.354352	1.71483	NaN	1.51029	0.685913		380.973	-1	1.3868	0.972242	1.2988	2.026	0.275632
381.524	1	0.439362	0.227428	0.506184	0.439871	3.10952		381.547	1	0.682762	1.11351	3.29107	0.776215	0.688965		381.685	1	0.193348	1.02748	0.0788109	1.01037	0.463674		381.539	-1	0.347701	1.74535	NaN	1.54259	0.712865		381.473	-1	1.40732	0.960319	1.24682	1.95993	0.257112
382.024	1	0.515469	0.254701	0.482715	0.462016	3.06375		382.047	1	0.724324	1.10236	3.50031	0.817522	0.696687		382.185	1	0.173834	1.0294	0.0547792	0.991213	0.454391		382.039	-1	0.336831	1.80516	NaN	1.59017	0.730388		381.973	-1	1.399	0.950387	1.19133	1.90036	0.220473
382.524	1	0.596781	0.280829	0.454668	0.484071	3.03725		382.547	1	0.75327	1.0835	3.65848	0.868118	0.707107		382.685	1	0.150955	1.03119	0.0365571	0.968024	0.444814		382.539	0	0.32339	1.82441	NaN	1.62709	0.734455		382.473	-1	1.53741	0.940851	1.14233	1.76552	0.197114
383.024	1	0.698126	0.29709	0.418956	0.508459	3.40464		383.047	1	0.849047	1.05055	3.69962	0.964985	0.7138		383.185	1	0.124467	1.02725	0.015269	0.97384	0.442971		383.039	0	0.308971	1.82825	NaN	1.65994	0.733409		382.973	-1	1.68363	0.932177	1.09703	1.65886	0.174956
383.524	1	0.794659	0.316239	0.378921	0.526257	3.7099		383.547	1	0.973085	1.01165	3.69127	1.08142	0.718917		383.685	1	0.0976207	1.02266	-0.00624145	0.983019	0.442061		383.539	1	0.298659	1.83082	NaN	1.66409	0.730716		383.473	-1	1.79424	0.928692	1.07125	1.77281	0.152691
384.024	1	0.885661	0.33871	0.333915	0.536479	3.94372		384.047	1	1.05121	1.00246	3.63158	1.15551	0.710249		384.185	1	0.0843917	1.02147	0.00073129	0.984024	0.446497		384.039	1	0.289144	1.83141	NaN	1.66409	0.729129		383.973	-1	1.91235	0.926785	1.03948	1.88777	0.141363
384.524	1	0.859438	0.351032	0.298653	0.567769	4.17533		384.547	1	1.12508	1.00058	3.55639	1.21945	0.695575		384.685	1	0.0714467	1.02005	0.00778102	0.985038	0.450934		384.539	1	0.287684	1.79098	NaN	1.6395	0.756014		384.473	-1	2.05215	0.929444	0.990399	2.00569	0.161689
385.024	1	0.810925	0.364438	0.274058	0.613822	4.21514		385.047	1	1.22751	0.998333	3.47042	1.28494	0.670688		385.185	1	0.0656524	1.01259	0.0167693	0.986269	0.455392		385.039	1	0.287474	1.73079	NaN	1.60877	0.782237		384.973	-1	2.11505	0.930061	0.943869	2.19088	0.18321
385.524	1	0.74024	0.380318	0.264162	0.679542	3.97545		385.547	1	1.28255	0.994024	3.4517	1.33093	0.660165		385.685	1	0.0630618	1.00677	0.0263592	0.986528	0.459925		385.539	1	0.290746	1.61566	NaN	1.56095	0.806615		385.473	-1	2.0933	0.92843	0.900147	2.45015	0.206046
386.024	1	0.66616	0.380819	0.265164	0.831615	3.83059		386.047	1	1.26685	0.986641	3.53337	1.34781	0.671082		386.185	1	0.0692931	1.00548	0.0376061	0.984109	0.464668		386.039	1	0.305304	1.50674	NaN	1.53475	0.834127		385.973	-1	1.99974	0.931485	0.863312	2.54667	0.243984
386.524	1	0.592011	0.377757	0.269788	1.00261	3.70508		386.547	1	1.28449	0.973515	3.44817	1.36484	0.685448		386.685	1	0.0717093	1.00006	0.040623	0.979838	0.467975		386.539	1	0.331877	1.40443	NaN	1.53156	0.864976		386.473	-1	1.87779	0.936392	0.829201	2.57882	0.287896
387.024	1	0.530693	0.367782	0.301248	1.19087	3.56975		387.047	1	1.3186	0.958463	3.25683	1.37872	0.70098		387.185	1	0.0700808	0.990284	0.0349147	0.9736	0.46976		387.039	1	0.353458	1.27701	NaN	1.57178	0.884129		386.973	-1	1.734	0.934515	0.81671	2.61125	0.32609
387.524	1	0.477558	0.359359	0.331454	1.37084	3.45202		387.547	1	1.30611	0.959264	3.09507	1.36481	0.707066		387.685	1	0.0713306	0.988155	0.0194349	0.973085	0.470266		387.539	1	0.372935	1.13899	NaN	1.63028	0.898355		387.473	-1	1.59596	0.933906	0.808476	2.63286	0.367416
388.024	1	0.43169	0.352365	0.36055	1.5427	3.34986		388.047	1	1.28917	0.989295	2.96682	1.3652	0.707546		388.185	1	0.0739526	0.989674	-0.000702612	0.975298	0.470162		388.039	1	0.425983	1.06955	NaN	1.7289	0.89698		387.973	-1	1.49658	0.94254	0.815224	2.59643	0.427568
388.524	1	0.378696	0.350373	0.391425	1.6299	3.22356		388.547	1	1.26207	1.08625	2.91532	1.39831	0.695189		388.685	1	0.0775635	1.01282	-0.0537947	0.986227	0.486209		388.539	1	0.493926	1.0057	NaN	1.85633	0.895314		388.473	-1	1.41817	0.950367	0.829193	2.53135	0.482998
389.024	1	0.324624	0.34739	0.424651	1.71236	3.10429		389.047	1	1.26261	1.13731	2.83198	1.37348	0.694227		389.185	1	0.082841	1.0296	-0.101273	0.986124	0.500298		389.039	1	0.634449	0.941685	NaN	2.13625	0.899531		388.973	-1	1.39491	0.956075	0.862159	2.39086	0.526004
389.524	1	0.268988	0.342967	0.461294	1.78792	2.99523		389.547	1	1.26935	1.17821	2.73938	1.33475	0.696769		389.685	1	0.0992651	0.984221	-0.0833634	0.900528	0.488011		389.539	1	0.779271	0.857728	NaN	2.35821	0.887444		389.473	-1	1.43425	0.949486	0.877129	2.25658	0.561609
390.024	1	0.235395	0.329528	0.483896	1.86531	2.8291		390.047	1	1.25327	1.26292	2.58563	1.30634	0.729288		390.185	1	0.113663	0.946558	-0.0592046	0.823798	0.473373		390.039	1	0.931605	0.738923	NaN	2.47888	0.846872		389.973	-1	1.53699	0.930442	0.87387	2.12859	0.589719
390.524	1	0.203364	0.316334	0.511497	1.91863	2.67033		390.547	0	1.23235	1.32323	2.36459	1.26961	0.755256		390.685	1	0.124233	0.923476	-0.0232338	0.763827	0.454295		390.539	1	1.07573	0.634356	NaN	2.61324	0.808248		390.473	-1	1.59901	0.899158	0.921172	2.05475	0.586633
391.024	1	0.169191	0.305535	0.550768	1.93017	2.53673		391.047	0	1.20137	1.33262	2.00302	1.2155	0.767544		391.185	1	0.133942	0.900313	0.0155249	0.685271	0.437213		391.039	1	1.21447	0.539115	NaN	2.75657	0.7709		390.973	-1	1.64648	0.863501	0.986534	2.00026	0.572402
391.524	1	0.147583	0.300797	0.580192	1.96828	2.42535		391.547	-1	1.15464	1.37124	1.72634	1.19166	0.768253		391.685	1	0.142976	0.877087	0.0564706	0.592137	0.421698		391.539	1	1.23793	0.406267	NaN	2.69031	0.712281		391.473	-1	1.87361	0.817244	0.994469	2.00651	0.592813
392.024	1	0.126649	0.298426	0.609004	2.00911	2.32552		392.047	-1	1.09459	1.43466	1.52161	1.19349	0.759147		392.185	1	0.148342	0.90653	0.0513079	0.578043	0.424177		392.039	1	1.23743	0.271266	NaN	2.58237	0.651202		391.973	0	2.11248	0.785599	1.00376	2.01007	0.622335
392.524	1	0.097751	0.302453	0.643631	2.03962	2.2635		392.547	-1	1.06134	1.44277	1.35913	1.17356	0.720349		392.685	1	0.152759	0.950331	0.0337634	0.585462	0.431528		392.539	1	1.25629	0.265076	NaN	2.55084	0.636095		392.473	0	2.34932	0.836373	1.04117	1.97702	0.688287
393.024	1	0.0866758	0.302258	0.667863	2.08747	2.17774		393.047	-1	1.03647	1.43362	1.20986	1.14684	0.672277		393.185	1	0.163129	0.985174	0.043787	0.576009	0.432334		393.039	1	1.26065	0.260124	NaN	2.50674	0.626067		392.973	1	2.6226	0.889262	1.05773	1.9339	0.747007
393.524	1	0.088558	0.299076	0.684855	2.14729	2.07557		393.547	-1	0.966038	1.39827	1.32047	1.12435	0.640531		393.685	1	0.166995	1.01195	0.0642934	0.575553	0.426119		393.539	1	1.2245	0.258626	NaN	2.42756	0.630216		393.473	1	2.98475	0.94731	1.02344	1.86621	0.788091
394.024	1	0.147979	0.29366	0.711789	2.17365	2.01665		394.047	-1	0.892072	1.36347	1.47316	1.1012	0.61211		394.185	1	0.148713	1.01123	0.120497	0.605735	0.395996		394.039	1	1.19055	0.273453	NaN	2.34234	0.645089		393.973	1	3.2096	0.999772	0.98602	1.78883	0.788596
394.524	1	0.225133	0.284541	0.73522	2.2267	1.95213		394.547	-1	0.858902	1.38061	1.63492	1.06328	0.591795		394.685	1	0.131928	1.01829	0.163004	0.629261	0.367216		394.539	1	1.16012	0.3144	NaN	2.24743	0.677122		394.473	1	3.31317	1.0473	0.945838	1.7029	0.753261
395.024	1	0.319501	0.271826	0.75525	2.30568	1.88217		395.047	-1	0.824748	1.4139	1.83507	1.03051	0.58614		395.185	1	0.116954	1.03474	0.188933	0.644729	0.340062		395.039	1	1.13323	0.300952	NaN	2.14763	0.710971		394.973	1	3.32755	1.02616	0.894849	1.62214	0.697911
395.524	1	0.470075	0.260474	0.747214	2.34773	1.8618		395.547	-1	0.788114	1.48787	2.13205	1.01069	0.617444		395.685	1	0.103324	1.03509	0.210252	0.661389	0.328532		395.539	1	1.10866	0.251901	NaN	2.04463	0.746008		395.473	1	3.31239	0.982276	0.84028	1.54309	0.63593
396.024	1	0.614218	0.252066	0.734171	2.38336	1.81882		396.047	-1	0.778646	1.57742	2.2361	0.995911	0.640099		396.185	1	0.0903296	1.02783	0.229395	0.67861	0.324374		396.039	1	1.08296	0.189526	NaN	1.91835	0.826993		395.973	1	3.18591	0.903944	0.823914	1.53852	0.611092
396.524	1	0.74811	0.247232	0.716115	2.41259	1.74592		396.547	-1	0.788609	1.67812	2.20216	0.984729	0.656567		396.685	1	0.10631	1.03003	0.232221	0.656322	0.339147		396.539	0	1.05575	0.125526	NaN	1.79061	0.916416		396.473	1	3.04109	0.826551	0.809543	1.53703	0.590476
397.024	1	0.850067	0.235665	0.695158	2.39162	1.69606		397.047	-1	0.783116	1.71675	2.31922	0.988543	0.679345		397.185	1	0.123253	1.03039	0.23524	0.63351	0.355301		397.039	0	1.00063	0.079176	NaN	1.723	1.0055		396.973	1	2.74295	0.769451	0.803744	1.54403	0.601565
397.524	1	0.937515	0.221039	0.672884	2.34785	1.65667		397.547	-1	0.773835	1.74017	2.47328	0.996031	0.703669		397.685	1	0.123875	1.00914	0.252978	0.638891	0.366453		397.539	-1	0.954487	0.0698917	NaN	1.6616	1.09611		397.473	1	2.44459	0.719905	0.802882	1.55548	0.604777
398.024	1	0.977709	0.208088	0.666145	2.36518	1.59885		398.047	-1	0.754027	1.74574	2.49105	1.01261	0.721738		398.185	1	0.135899	0.99036	0.256755	0.644336	0.37388		398.039	-1	0.933251	0.163625	NaN	1.61747	1.19099		397.973	1	2.14574	0.687125	0.812977	1.57681	0.590508
398.524	1	1.00809	0.195485	0.662634	2.3952	1.5372		398.547	-1	0.737777	1.75157	2.51051	1.03075	0.740367		398.685	1	0.16996	0.976332	0.23355	0.649906	0.374107		398.539	-1	0.915606	0.271053	NaN	1.60543	1.26275		398.473	0	1.8575	0.679527	0.805392	1.56366	0.602819
399.024	1	0.999745	0.180885	0.657742	2.45165	1.46463		399.047	-1	0.764322	1.78015	2.69982	1.05207	0.770975		399.185	1	0.199607	0.963336	0.209898	0.668356	0.369572		399.039	-1	0.904226	0.402371	NaN	1.64939	1.29422		398.973	0	1.58325	0.705147	0.774485	1.50502	0.650194
399.524	1	0.991442	0.167587	0.652197	2.51093	1.38978		399.547	-1	0.784221	1.80583	2.84496	1.0673	0.801563		399.685	1	0.225899	0.951123	0.185905	0.696593	0.361418		399.539	-1	0.879006	0.563928	NaN	1.61986	1.32757		399.473	-1	1.40906	0.72478	0.748297	1.39729	0.698129
400.024	1	0.995806	0.162412	0.643351	2.57789	1.30537		400.047	-1	0.778063	1.82013	2.81695	1.05866	0.832077		400.185	1	0.271248	0.938833	0.161867	0.712138	0.359082		400.039	-1	0.84012	0.75534	NaN	1.51776	1.36278		399.973	-1	1.28384	0.741485	0.724419	1.26552	0.746337
400.524	1	1.03127	0.161428	0.639336	2.63105	1.23094		400.547	-1	0.767175	1.84993	2.78837	1.04689	0.823272		400.685	1	0.321574	0.926566	0.137904	0.724098	0.358443		400.539	-1	0.756383	0.862626	NaN	1.42491	1.3638		400.473	-1	1.17952	0.753535	0.6781	1.1349	0.788566
401.024	1	1.09237	0.163898	0.639302	2.67284	1.16474		401.047	-1	0.749832	1.90089	2.75902	1.03087	0.760789		401.185	1	0.335072	0.919192	0.123306	0.731554	0.365788		401.039	-1	0.657261	0.941057	NaN	1.33522	1.35307		400.973	-1	1.09602	0.762909	0.630116	1.01052	0.798217
401.524	1	1.17465	0.165944	0.638194	2.6441	1.10872		401.547	-1	0.741215	1.94266	2.62125	0.997347	0.699212		401.685	1	0.353613	0.912049	0.108844	0.740415	0.372225		401.539	-1	0.576683	1.01473	NaN	1.21039	1.33101		401.473	-1	1.05047	0.767794	0.583221	0.898504	0.74315
402.024	1	1.26224	0.167714	0.6369	2.60949	1.06063		402.047	-1	0.737434	1.97932	2.42339	0.954135	0.638137		402.185	1	0.389274	0.905688	0.0948475	0.754046	0.375583		402.039	-1	0.501733	1.08675	NaN	1.07657	1.30574		401.973	-1	1.11741	0.771291	0.532992	0.825806	0.694444
402.524	1	1.35291	0.169078	0.635622	2.58891	1.02505		402.547	-1	0.791064	2.01809	2.28446	0.923914	0.55992		402.685	1	0.428405	0.901688	0.0816179	0.768912	0.380928		402.539	-1	0.53961	1.08454	NaN	1.07755	1.25981		402.473	-1	1.33285	0.772955	0.478362	0.805008	0.654135
403.024	1	1.43912	0.170208	0.62827	2.53647	0.992076		403.047	-1	0.862527	2.0575	2.16383	0.897729	0.476378		403.185	1	0.471655	0.900492	0.0692991	0.785243	0.388634		403.039	-1	0.583674	1.08372	NaN	1.08337	1.21684		402.973	0	1.62278	0.773098	0.435479	0.784806	0.696765
403.524	1	1.51985	0.171049	0.613417	2.44467	0.962342		403.547	-1	0.990928	2.03849	2.24173	0.867292	0.471637		403.685	1	0.531595	0.898408	0.0615714	0.791069	0.392077		403.539	-1	0.649245	1.08771	NaN	1.10601	1.1842		403.473	0	1.95264	0.772425	0.398894	0.764925	0.783858
404.024	1	1.60616	0.169437	0.601992	2.3933	0.951823		404.047	-1	1.1276	2.01167	2.30914	0.842236	0.466492		404.185	1	0.59875	0.895941	0.0558282	0.792354	0.393678		404.039	-1	0.723285	1.09925	NaN	1.13193	1.15825		403.973	1	2.25412	0.765529	0.363423	0.748687	0.936143
404.524	1	1.71254	0.168463	0.594755	2.31472	0.934773		404.547	-1	1.28853	1.96256	2.3061	0.839038	0.448213		404.685	1	0.648706	0.895927	0.055819	0.78904	0.403267		404.539	-1	0.807937	1.12026	NaN	1.16195	1.14069		404.473	1	2.52272	0.756467	0.330498	0.729825	1.09744
405.024	1	1.8502	0.168714	0.593847	2.18951	0.905707		405.047	-1	1.48211	1.87915	2.27535	0.833847	0.432711		405.185	1	0.692213	0.896579	0.0549003	0.793202	0.412741		405.039	-1	0.91536	1.11464	NaN	1.16279	1.12027		404.973	1	2.56106	0.737387	0.316694	0.685591	1.2538
405.524	1	1.91313	0.167195	0.594803	2.08929	0.893239		405.547	-1	1.71999	1.74919	2.20697	0.825954	0.42098		405.685	1	0.70625	0.899889	0.0451712	0.845536	0.416957		405.539	-1	1.0343	1.09556	NaN	1.14888	1.09839		405.473	1	2.57064	0.718	0.302838	0.639029	1.39184
406.024	1	1.95645	0.166434	0.596032	2.01941	0.886986		406.047	-1	1.89535	1.63535	2.13696	0.835326	0.404123		406.185	1	0.705331	0.902369	0.0387098	0.898377	0.423967		406.039	-1	1.12548	1.11949	NaN	1.11123	1.08428		405.973	1	2.48436	0.697588	0.288813	0.584711	1.46878
406.524	1	2.00145	0.169854	0.596486	2.02945	0.886655		406.547	-1	2.0184	1.535	2.0656	0.859148	0.382975		406.685	1	0.673353	0.903123	0.0390354	0.95227	0.436778		406.539	-1	1.21233	1.15013	NaN	1.06987	1.07138		406.473	1	2.39143	0.670591	0.278984	0.527217	1.5427
407.024	1	2.04472	0.178053	0.603774	2.0677	0.893144		407.047	-1	2.06317	1.43409	2.09689	0.890352	0.35926		407.185	1	0.632121	0.904991	0.0389833	1.00703	0.447211		407.039	-1	1.30638	1.23538	NaN	1.02827	1.0505		406.973	1	2.29035	0.635534	0.274292	0.465833	1.61292
407.524	1	2.08569	0.192626	0.62018	2.1436	0.908731		407.547	-1	2.04537	1.35291	2.1721	0.924286	0.336492		407.685	1	0.582912	0.90782	0.0386058	1.06253	0.455591		407.539	-1	1.36618	1.3194	NaN	0.98397	1.02185		407.473	1	2.18204	0.606913	0.267108	0.433027	1.68408
408.024	1	2.15397	0.206187	0.639422	2.22064	0.904528		408.047	-1	1.84705	1.37279	2.29038	0.95915	0.323029		408.185	1	0.528802	0.90713	0.047732	1.06724	0.468911		408.039	-1	1.292	1.39526	NaN	0.929183	0.963404		407.973	1	2.06985	0.581738	0.25859	0.415513	1.75573
408.524	1	2.21646	0.218587	0.65666	2.28724	0.889044		408.547	-1	1.78387	1.41056	2.39918	0.994771	0.328266		408.685	1	0.473099	0.905297	0.059949	1.05544	0.483838		408.539	-1	1.1974	1.45165	NaN	0.872367	0.912938		408.473	1	1.96967	0.547921	0.256556	0.396329	1.82908
409.024	1	2.21794	0.228016	0.662233	2.31248	0.858889		409.047	-1	1.79285	1.45851	2.49418	1.02435	0.352796		409.185	1	0.443381	0.911321	0.0649712	1.10193	0.497227		409.039	-1	1.07499	1.48154	NaN	0.81279	0.87333		408.973	1	1.87306	0.511546	0.256441	0.376652	1.90294
409.524	1	2.19677	0.236842	0.666649	2.32431	0.819829		409.547	-1	1.77454	1.50981	2.49498	0.98289	0.475849		409.685	1	0.417137	0.914821	0.0716871	1.13907	0.509907		409.539	-1	0.908386	1.50686	NaN	0.75084	0.849458		409.473	1	1.81526	0.48513	0.255353	0.364191	1.96338
410.024	1	2.16457	0.245962	0.668464	2.33418	0.777583		410.047	-1	1.7637	1.55107	2.49038	0.942354	0.625651		410.185	0	0.402921	0.908662	0.0849547	1.13942	0.520005		410.039	-1	0.717409	1.52966	NaN	0.687583	0.834261		409.973	1	1.75956	0.458991	0.254512	0.351183	2.02195
410.524	1	2.15216	0.260483	0.65435	2.39363	0.752667		410.547	-1	1.76994	1.56939	2.47342	0.903925	0.836583		410.685	0	0.410439	0.901496	0.0910873	1.13961	0.526361		410.539	-1	0.659877	1.55716	NaN	0.613947	0.86692		410.473	1	1.71046	0.433568	0.254634	0.33586	2.07384
411.024	1	2.16171	0.273217	0.647246	2.42903	0.731474		411.047	0	1.72003	1.55704	2.43682	0.856095	1.0626		411.185	-1	0.46945	0.891943	0.0803153	1.13943	0.523854		411.039	-1	0.638496	1.58364	NaN	0.538357	0.911104		410.973	1	1.65268	0.412087	0.25648	0.32519	2.12691
411.524	1	2.2006	0.283563	0.649513	2.43226	0.715256		411.547	0	1.59398	1.50307	2.37358	0.795516	1.30908		411.685	-1	0.528956	0.877944	0.0662814	1.10773	0.518604		411.539	-1	0.764715	1.523	NaN	0.485866	0.950255		411.473	1	1.58235	0.396298	0.260816	0.32124	2.18167
412.024	1	2.1647	0.28847	0.641521	2.45172	0.684974		412.047	1	1.49381	1.44334	2.35228	0.762919	1.51719		412.185	-1	0.588865	0.860328	0.0495937	1.0504	0.511122		412.039	-1	0.905204	1.48071	NaN	0.44145	0.99405		411.973	1	1.49549	0.383412	0.266515	0.309928	2.22295
412.524	1	2.06752	0.288696	0.625267	2.48417	0.642453		412.547	1	1.41708	1.3784	2.36897	0.755659	1.69057		412.685	-1	0.633572	0.851532	0.0374144	1.03177	0.498872		412.539	-1	1.08981	1.49518	NaN	0.421997	1.0522		412.473	1	1.3997	0.372095	0.272952	0.294638	2.25695
413.024	1	2.02294	0.264021	0.6341	2.46526	0.518621		413.047	1	1.32792	1.31226	2.38228	0.747813	1.84852		413.185	-1	0.674022	0.845207	0.0264978	1.02398	0.485286		413.039	-1	1.22159	1.50821	NaN	0.43804	1.09372		412.973	1	1.31437	0.355591	0.278385	0.285019	2.27601
413.524	1	2.00296	0.245608	0.641188	2.4723	0.40745		413.547	1	1.21503	1.24387	2.38914	0.738848	1.97704		413.685	-1	0.744835	0.811809	0.0857254	1.05563	0.522643		413.539	-1	1.2924	1.5196	NaN	0.495052	1.11604		413.473	1	1.23233	0.33757	0.283493	0.276996	2.2904
414.024	1	2.00684	0.233265	0.646583	2.5045	0.30855		414.047	1	1.11456	1.19439	2.34509	0.729014	2.09471		414.185	-1	0.822196	0.802917	0.140415	1.12181	0.568396		414.039	-1	1.28856	1.58042	NaN	0.559929	1.12485		413.973	1	1.16941	0.325628	0.285214	0.253631	2.28148
414.524	1	2.14696	0.224077	0.650641	2.55462	0.242946		414.547	1	1.0245	1.16077	2.25838	0.718451	2.20328		414.685	-1	0.922892	0.888758	0.174141	1.31739	0.643448		414.539	-1	1.24971	1.66441	NaN	0.628494	1.12734		414.473	1	1.11122	0.313959	0.286317	0.231129	2.27359
415.024	1	2.31535	0.215543	0.654421	2.60847	0.184247		415.047	1	0.981843	1.11308	2.17337	0.713663	2.26643		415.185	-1	1.02833	0.94635	0.199129	1.43971	0.792437		415.039	-1	1.19283	1.60333	NaN	0.67812	1.08022		414.973	1	1.0921	0.30454	0.282316	0.215758	2.27413
415.524	1	2.43705	0.217777	0.637134	2.6547	0.175064		415.547	1	0.955486	1.06056	2.08894	0.71086	2.31397		415.685	-1	1.14065	0.96299	0.211448	1.45581	1.04862		415.539	-1	1.13737	1.53441	NaN	0.724366	1.02929		415.473	1	1.07298	0.295121	0.278315	0.200387	2.27468
416.024	1	2.53597	0.218089	0.618825	2.72168	0.164632		416.047	1	0.960674	0.977193	2.06117	0.743786	2.35733		416.185	-1	1.2026	1.00786	0.209821	1.44453	1.26909		416.039	-1	1.11058	1.52971	NaN	0.758692	0.990513		415.973	1	1.05353	0.286018	0.277836	0.173204	2.27867
416.524	1	2.57682	0.212146	0.599664	2.84617	0.146215		416.547	1	0.970893	0.889945	2.04281	0.780998	2.39767		416.685	-1	1.235	1.06929	0.200012	1.41718	1.4686		416.539	-1	1.09025	1.52538	NaN	0.79215	0.954946		416.473	1	1.03507	0.275922	0.276994	0.153427	2.28487
417.024	1	2.51205	0.210339	0.594471	2.94523	0.134533		417.047	1	0.981918	0.813287	2.02996	0.803579	2.4119		417.185	-1	1.26045	1.05012	0.232989	1.23598	1.62043		417.039	-1	1.08337	1.52179	NaN	0.823799	0.926062		416.973	1	1.02231	0.260089	0.273024	0.179354	2.30255
417.524	1	2.40631	0.210156	0.595252	3.03354	0.125722		417.547	1	0.976189	0.749479	2.03185	0.819109	2.43004		417.685	-1	1.28665	1.02475	0.275779	1.04514	1.74769		417.539	-1	1.07398	1.51932	NaN	0.858293	0.902842		417.473	1	1.00265	0.243483	0.273089	0.20584	2.31511
418.024	1	2.316	0.209875	0.608307	3.1025	0.122592		418.047	1	0.935537	0.712458	2.06449	0.819938	2.45636		418.185	-1	1.33217	1.07037	0.348628	1.01285	1.69968		418.039	-1	1.06171	1.51815	NaN	0.896069	0.886163		417.973	1	0.971139	0.225548	0.280086	0.233286	2.31885
418.524	1	2.22219	0.208767	0.622051	3.16505	0.120685		418.547	1	0.886838	0.693852	2.06003	0.78269	2.47178		418.685	-1	1.39042	1.12722	0.435758	0.981091	1.65956		418.539	-1	1.05068	1.47246	NaN	0.919611	0.87693		418.473	1	1.01063	0.214525	0.293104	0.263001	2.32982
419.024	1	2.08738	0.197929	0.643887	3.15221	0.133163		419.047	1	0.83022	0.693367	2.01907	0.707969	2.47649		419.185	-1	1.47406	1.20646	0.551363	0.950412	1.63519		419.039	-1	1.04018	1.40816	NaN	0.937202	0.87081		418.973	1	1.09579	0.207949	0.309994	0.294176	2.34544
419.524	1	1.95989	0.18628	0.664441	3.13735	0.143265		419.547	1	0.793501	0.684272	1.97418	0.637528	2.495		419.685	-1	1.4791	1.26897	0.652612	0.949242	1.5889		419.539	-1	1.06095	1.45359	NaN	0.912091	0.828103		419.473	1	1.25954	0.203399	0.368954	0.300942	2.33885
420.024	1	1.90012	0.167117	0.673103	3.10377	0.131337		420.047	1	0.76519	0.67154	1.92762	0.568895	2.51934		420.185	-1	1.4191	1.31763	0.741979	0.972489	1.52447		420.039	-1	1.08602	1.49989	NaN	0.875059	0.785083		419.973	1	1.43302	0.199456	0.437531	0.302992	2.32715
420.524	1	1.82901	0.149099	0.684863	3.06889	0.125592		420.547	1	0.76612	0.64151	1.9465	0.523977	2.5125		420.685	-1	1.34824	1.39086	0.766634	0.942073	1.4559		420.539	-1	1.12166	1.49847	NaN	0.787523	0.757841		420.473	1	1.42797	0.198201	0.500686	0.325833	2.31766
421.024	1	1.73105	0.133791	0.703946	3.03097	0.134467		421.047	1	0.768579	0.609587	1.96562	0.486844	2.50426		421.185	-1	1.27408	1.47154	0.771651	0.895375	1.38607		421.039	-1	1.14757	1.51605	NaN	0.714399	0.729499		420.973	1	1.39303	0.195363	0.560923	0.35467	2.30466
421.524	1	1.67156	0.128456	0.712411	2.95401	0.148033		421.547	1	0.769956	0.573276	1.96614	0.482098	2.49842		421.685	-1	1.07569	1.52978	0.703808	0.96969	1.24895		421.539	-1	1.15777	1.56427	NaN	0.664512	0.699384		421.473	1	1.20877	0.184619	0.606583	0.413455	2.27415
422.024	1	1.64815	0.132476	0.710914	2.84042	0.165999		422.047	1	0.779027	0.527883	1.95545	0.480826	2.48586		422.185	0	0.898389	1.58683	0.628154	1.0353	1.12228		422.039	-1	1.13291	1.60586	NaN	0.638827	0.692048		421.973	0	1.03595	0.180828	0.646944	0.47113	2.2706
422.524	1	1.55987	0.143565	0.696965	2.71829	0.199533		422.547	1	0.799455	0.469079	1.92819	0.484683	2.4634		422.685	0	0.829216	1.64225	0.530571	1.04562	1.05008		422.539	-1	1.07082	1.6404	NaN	0.638862	0.708919		422.473	0	0.879792	0.187169	0.679586	0.527187	2.30633
423.024	1	1.49297	0.154257	0.674389	2.61667	0.226388		423.047	1	0.824697	0.408517	1.88428	0.498744	2.45294		423.185	1	0.750054	1.68711	0.46233	1.08803	0.986337		423.039	-1	0.988627	1.79236	NaN	0.656073	0.710966		422.973	-1	0.80753	0.187493	0.636181	0.56162	2.33553
423.524	1	1.45344	0.164354	0.641355	2.54048	0.244764		423.547	1	0.859237	0.34719	1.8289	0.519692	2.45389		423.685	1	0.656494	1.71677	0.436385	1.17669	0.934788		423.539	-1	0.898801	1.98891	NaN	0.679806	0.707385		423.473	-1	0.785048	0.184245	0.547652	0.583221	2.36083
424.024	1	1.45977	0.164161	0.590813	2.49011	0.270384		424.047	1	0.983926	0.291782	1.76733	0.542305	2.50546		424.185	1	0.616436	1.73338	0.508195	1.15406	0.906298		424.039	-1	0.818764	2.08611	NaN	0.685612	0.698703		423.973	-1	0.801114	0.224965	0.460782	0.563613	2.35898
424.524	1	1.50599	0.157022	0.531471	2.45695	0.307515		424.547	1	1.07146	0.24391	1.68949	0.560396	2.50939		424.685	1	0.60791	1.74229	0.637613	1.06585	0.891397		424.539	-1	0.743984	2.16509	NaN	0.688597	0.689057		424.473	-1	0.817434	0.273655	0.371986	0.535293	2.34509
425.024	1	1.65902	0.146566	0.497586	2.43002	0.415271		425.047	1	1.06542	0.215016	1.57067	0.567094	2.39334		425.185	1	0.644104	1.744	0.782773	1.02425	0.845523		425.039	-1	0.689847	2.18944	NaN	0.683788	0.676486		424.973	-1	0.738237	0.319674	0.252298	0.492284	2.23452
425.524	1	1.80539	0.137083	0.473639	2.39005	0.537541		425.547	1	1.05308	0.194867	1.39366	0.564012	2.24905		425.685	1	0.690712	1.74469	0.929933	0.989296	0.795315		425.539	-1	0.637205	2.16916	NaN	0.695518	0.662657		425.473	-1	0.669425	0.370397	0.152895	0.453872	2.12026
426.024	1	1.94203	0.12902	0.464186	2.33108	0.680975		426.047	1	1.03405	0.184013	1.15482	0.550534	2.07476		426.185	1	0.771676	1.74761	1.06939	0.940129	0.755531		426.039	-1	0.586947	2.07764	NaN	0.733646	0.646823		425.973	-1	0.645762	0.441568	0.141679	0.435446	1.98996
426.524	1	2.03498	0.126876	0.474639	2.24044	0.839609		426.547	1	0.915821	0.174187	1.05997	0.533538	1.85063		426.685	1	0.853424	1.73437	1.13244	0.905433	0.723523		426.539	0	0.53828	2.0225	NaN	0.760894	0.625199		426.473	0	0.654226	0.502021	0.131689	0.417842	1.86683
427.024	1	2.10212	0.128229	0.496853	2.13108	1.00722		427.047	1	0.798701	0.17264	1.06319	0.526461	1.65028		427.185	1	0.93699	1.68366	1.01824	0.904312	0.709559		427.039	0	0.490745	1.99322	NaN	0.780407	0.599459		426.973	0	0.735072	0.53833	0.124462	0.402089	1.75987
427.524	1	2.11007	0.129307	0.5159	2.00019	1.14415		427.547	1	0.76898	0.198868	1.28445	0.556672	1.57417		427.685	1	1.00565	1.63171	0.921977	0.910815	0.712763		427.539	1	0.463129	1.88606	NaN	0.786093	0.57114		427.473	1	1.01284	0.568578	0.125669	0.434116	1.59969
428.024	1	2.10019	0.130301	0.533991	1.86283	1.27182		428.047	1	0.760005	0.236876	1.50611	0.600591	1.5945		428.185	1	1.06089	1.57865	0.841855	0.924179	0.731414		428.039	1	0.443865	1.74626	NaN	0.785983	0.541742		427.973	1	1.46664	0.59341	0.134414	0.508855	1.39193
428.524	1	2.09005	0.130895	0.549625	1.72189	1.40683		428.547	1	0.781661	0.292276	1.72835	0.664749	1.7572		428.685	1	1.06179	1.55011	0.833936	0.900063	0.720767		428.539	1	0.447976	1.66838	NaN	0.739938	0.529525		428.473	1	1.90914	0.608875	0.16188	0.610907	1.2177
429.024	1	2.07719	0.130931	0.562426	1.58657	1.54079		429.047	1	0.807309	0.332889	1.87204	0.716884	1.82422		429.185	1	1.04439	1.52982	0.850343	0.86332	0.70025		429.039	1	0.458498	1.60828	NaN	0.684524	0.523133		428.973	1	2.3478	0.621166	0.195694	0.72222	1.05485
429.524	1	2.05764	0.129599	0.568308	1.46518	1.672		429.547	1	0.835417	0.364384	1.9673	0.761604	1.83226		429.685	1	1.03953	1.55291	0.960939	0.924829	0.690152		429.539	1	0.49973	1.64651	NaN	0.63733	0.562918		429.473	1	2.6453	0.621067	0.236877	0.864292	0.889709
430.024	1	2.03752	0.133009	0.574776	1.36763	1.8034		430.047	1	0.851074	0.375166	1.85588	0.79345	1.85951		430.185	1	1.02347	1.58116	1.06456	1.00225	0.678827		430.039	1	0.540286	1.68917	NaN	0.592863	0.604943		429.973	1	2.90738	0.618449	0.279431	1.01034	0.726988
430.524	1	2.017	0.139742	0.581654	1.28676	1.93494		430.547	1	0.845569	0.363971	1.7259	0.813033	1.81832		430.685	1	0.956978	1.62638	1.1257	1.1366	0.660821		430.539	1	0.573533	1.77987	NaN	0.577895	0.671205		430.473	1	2.79452	0.605065	0.323567	1.0978	0.670165
431.024	1	2.04553	0.140942	0.573872	1.22278	2.04192		431.047	1	0.800805	0.314992	1.63653	0.812034	1.6274		431.185	1	0.922345	1.63983	1.14486	1.25217	0.674913		431.039	1	0.617764	1.83884	NaN	0.577485	0.73506		430.973	1	2.6703	0.589447	0.363064	1.17891	0.610642
431.524	1	2.07532	0.141918	0.563872	1.16463	2.14378		431.547	1	0.760706	0.287221	1.54837	0.829678	1.52598		431.685	1	0.934171	1.60698	1.10281	1.34037	0.73581		431.539	1	0.687144	1.8252	NaN	0.610408	0.793408		431.473	1	2.46833	0.558532	0.370781	1.21655	0.532626
432.024	1	2.07398	0.145717	0.547868	1.14059	2.22396		432.047	1	0.72238	0.26751	1.46067	0.854408	1.45857		432.185	1	0.92235	1.562	1.06617	1.37121	0.789688		432.039	1	0.74358	1.76547	NaN	0.653181	0.852112		431.973	1	2.29081	0.528218	0.364679	1.23437	0.460648
432.524	1	2.0653	0.146364	0.532669	1.10269	2.28925		432.547	1	0.721404	0.23799	1.39071	0.870672	1.39062		432.685	1	0.895543	1.50827	1.03467	1.36346	0.838986		432.539	1	0.789184	1.66718	NaN	0.704195	0.911116		432.473	1	2.15528	0.498937	0.334847	1.21816	0.399043
433.024	1	2.05146	0.1448	0.518034	1.05505	2.34411		433.047	1	0.724987	0.209729	1.32321	0.887613	1.31968		433.185	1	0.863745	1.41804	1.05841	1.27299	0.882709		433.039	1	0.845916	1.57726	NaN	0.744557	0.95866		432.973	1	2.0332	0.467702	0.282754	1.17913	0.359198
433.524	1	2.03354	0.14268	0.520458	1.01732	2.36198		433.547	1	0.742508	0.192318	1.26401	0.911494	1.23129		433.685	1	0.818653	1.3414	1.15001	1.19295	0.896882		433.539	1	0.90645	1.49021	NaN	0.781279	1.00229		433.473	1	1.92055	0.435096	0.215037	1.1241	0.334627
434.024	1	2.01558	0.140553	0.523079	0.979698	2.37941		434.047	1	0.768217	0.173781	1.21235	0.933678	1.15834		434.185	1	0.734227	1.30494	1.44242	1.14376	0.823625		434.039	1	0.924997	1.46921	NaN	0.736982	1.0376		433.973	1	1.85622	0.405121	0.150029	1.06549	0.322756
434.524	1	1.95459	0.135815	0.533882	0.934232	2.40566		434.547	1	0.808172	0.153284	1.17382	0.952912	1.11226		434.685	1	0.682842	1.28512	1.72774	1.1109	0.76144		434.539	1	0.934131	1.45667	NaN	0.67772	1.07065		434.473	0	1.80323	0.376124	0.0864185	1.007	0.313567
435.024	1	1.87696	0.130004	0.547578	0.887182	2.4358		435.047	1	0.842694	0.138582	1.1523	0.959364	1.06217		435.185	1	0.667481	1.28343	2.00533	1.09585	0.711326		435.039	1	0.912478	1.42377	NaN	0.593762	1.0933		434.973	0	1.74197	0.359517	0.0496198	0.983707	0.291546
435.524	1	1.75614	0.120342	0.564096	0.860801	2.4845		435.547	1	0.873353	0.128001	1.14289	0.956727	1.00923		435.685	1	0.679794	1.36423	2.23756	1.08537	0.670092		435.539	1	0.884385	1.39328	NaN	0.506587	1.1334		435.473	-1	1.67339	0.345821	0.0160057	0.96183	0.270397
436.024	1	1.62543	0.112452	0.576176	0.82395	2.53535		436.047	1	0.886201	0.108899	1.12294	0.951726	0.966691		436.185	1	0.702806	1.47692	2.45226	1.07666	0.632291		436.039	1	0.842879	1.36781	NaN	0.412713	1.20983		435.973	-1	1.58452	0.340181	-0.00879373	0.943883	0.251658
436.524	1	1.47775	0.107601	0.580646	0.76915	2.5899		436.547	1	0.890876	0.0858862	1.09817	0.945642	0.928923		436.685	1	0.781192	1.57732	2.32419	1.1352	0.676438		436.539	1	0.801585	1.32776	NaN	0.351971	1.32253		436.473	-1	1.4922	0.338153	-0.0325599	0.933647	0.232676
437.024	1	1.32924	0.107354	0.586252	0.722728	2.64268		437.047	1	0.875995	0.0714007	1.08128	0.948758	0.869421		437.185	1	0.837464	1.67013	2.20021	1.17177	0.692863		437.039	1	0.760483	1.27451	NaN	0.321207	1.46803		436.973	-1	1.39595	0.340242	-0.0551478	0.932206	0.213414
437.524	1	1.18032	0.109388	0.59242	0.680456	2.69458		437.547	1	0.859958	0.057579	1.06501	0.954029	0.810178		437.685	1	0.770465	1.72809	2.17887	1.08304	0.551752		437.539	1	0.738775	1.22035	NaN	0.301805	1.63907		437.473	-1	1.32991	0.333891	-0.0811105	0.918441	0.198572
438.024	1	1.05532	0.107949	0.594967	0.629141	2.75939		438.047	1	0.86448	0.0371332	1.04258	0.973184	0.796366		438.185	1	0.704181	1.74488	2.10169	0.976764	0.514539		438.039	1	0.724409	1.16585	NaN	0.286704	1.81979		437.973	-1	1.2765	0.324016	-0.108483	0.899528	0.185575
438.524	1	0.934868	0.106409	0.598522	0.584825	2.81885		438.547	1	0.876052	0.0271798	1.0462	0.983239	0.776163		438.685	1	0.639053	1.69514	1.93422	0.842151	0.645272		438.539	1	0.714845	1.12182	NaN	0.347183	1.95461		438.473	-1	1.24171	0.320324	-0.12548	0.890187	0.186544
439.024	1	0.830494	0.10494	0.606947	0.571974	2.85336		439.047	1	0.902318	0.0390982	1.10414	0.974321	0.74264		439.185	1	0.59725	1.73489	1.96816	0.676445	0.71712		439.039	1	0.705451	1.07816	NaN	0.410354	2.08779		438.973	-1	1.21087	0.317623	-0.137912	0.880414	0.188861
439.524	1	0.729478	0.103213	0.617596	0.550138	2.89184		439.547	1	0.934667	0.0478302	1.12903	0.955888	0.710871		439.685	1	0.573072	1.84225	2.1543	0.487244	0.744473		439.539	1	0.684548	1.02403	NaN	0.4973	2.21239		439.473	-1	1.1946	0.318174	-0.130411	0.865866	0.194078
440.024	1	0.636012	0.100904	0.633245	0.508094	2.93924		440.047	1	0.974638	0.0525689	1.1125	0.925531	0.681302		440.185	1	0.697259	1.94785	2.17672	0.328735	0.89285		440.039	1	0.671549	0.969848	NaN	0.583259	2.33178		439.973	-1	1.18472	0.323638	-0.113156	0.864593	0.199524
440.524	1	0.569603	0.102141	0.646707	0.484262	2.93768		440.547	1	0.997483	0.0602938	1.13591	0.911498	0.614867		440.685	1	0.859972	2.05353	2.15763	0.179012	1.06967		440.539	1	0.689981	0.916069	NaN	0.663933	2.43146		440.473	-1	1.18502	0.336918	-0.0803867	0.884436	0.205336
441.024	1	0.512301	0.104572	0.659434	0.46656	2.91965		441.047	1	1.01168	0.0695271	1.17949	0.90571	0.529809		441.185	1	0.977141	2.20061	2.26569	0.0838417	0.975507		441.039	1	0.732502	0.874637	NaN	0.714291	2.53153		440.973	-1	1.22015	0.328424	-0.0447293	0.903924	0.200136
441.524	1	0.446108	0.104858	0.674591	0.440248	2.938		441.547	1	0.947784	0.0614622	1.21665	0.908673	0.484026		441.685	1	1.08965	2.33455	2.35463	-0.0095624	0.890138		441.539	1	0.807588	0.849895	NaN	0.723665	2.63212		441.473	-1	1.27794	0.30575	-0.00719097	0.923183	0.187763
442.024	1	0.404574	0.105303	0.683068	0.420636	2.97262		442.047	1	0.882252	0.0550385	1.25044	0.916351	0.448229		442.185	1	1.14374	2.30345	2.20353	-0.0807992	0.915121		442.039	1	0.86918	0.816559	NaN	0.729068	2.71615		441.973	-1	1.32835	0.372197	0.0720855	0.933473	0.236653
442.524	1	0.393849	0.106035	0.683199	0.409655	3.0258		442.547	1	0.82188	0.0586695	1.27025	0.943603	0.450581		442.685	1	1.16651	2.28672	2.08747	-0.124743	0.937024		442.539	1	0.922688	0.778075	NaN	0.732092	2.79025		442.473	-1	1.37592	0.472823	0.167369	0.940324	0.309037
443.024	1	0.361206	0.108889	0.70002	0.34783	3.04575		443.047	1	0.771229	0.0827872	1.25302	0.988477	0.500556		443.185	1	1.11646	2.30341	2.05285	-0.105243	0.951768		443.039	1	0.941721	0.728596	NaN	0.752456	2.84451		442.973	-1	1.41442	0.560028	0.24279	0.911512	0.36563
443.524	1	0.343372	0.114154	0.712902	0.28636	3.07014		443.547	1	0.734883	0.137053	1.18125	1.05928	0.620611		443.685	1	1.09248	2.30585	2.02896	-0.0954116	0.97221		443.539	1	0.95037	0.677337	NaN	0.775502	2.8939		443.473	-1	1.44823	0.64953	0.313484	0.879573	0.423206
444.024	1	0.353933	0.123273	0.716761	0.232373	3.10667		444.047	0	0.709564	0.188233	1.05547	1.1289	0.717075		444.185	1	1.09117	2.29591	2.0144	-0.0939888	0.997611		444.039	1	0.872824	0.631098	NaN	0.787957	2.91684		443.973	-1	1.46083	0.75497	0.366045	0.842598	0.490713
444.524	1	0.361212	0.133653	0.716777	0.165737	3.11779		444.547	-1	0.690635	0.236516	0.90466	1.19687	0.795055		444.685	1	1.11631	2.29505	2.01114	-0.0917599	0.995163		444.539	1	0.802546	0.593676	NaN	0.806226	2.9742		444.473	-1	1.4763	0.827673	0.401251	0.800089	0.53322
445.024	1	0.363734	0.145863	0.711222	0.0807636	3.09209		445.047	-1	0.669164	0.273644	0.833435	1.25495	0.826934		445.185	1	1.15028	2.29722	2.01165	-0.0892616	0.983414		445.039	1	0.754638	0.583397	NaN	0.842394	3.13751		444.973	-1	1.49985	0.807976	0.387468	0.741959	0.505165
445.524	1	0.393832	0.150288	0.68445	0.0380509	3.14079		445.547	-1	0.654745	0.31501	0.830167	1.30779	0.844282		445.685	1	1.2462	2.2691	1.97891	-0.0158243	1.00642		445.539	1	0.719432	0.581792	NaN	0.89243	3.31015		445.473	-1	1.53212	0.788003	0.373578	0.688503	0.486321
446.024	1	0.413692	0.153669	0.659847	0.00538646	3.17757		446.047	-1	0.667977	0.372995	1.09337	1.34008	0.804644		446.185	1	1.34259	2.24155	1.93958	0.0583838	1.02352		446.039	1	0.697768	0.589434	NaN	0.95725	3.49274		445.973	-1	1.57369	0.767736	0.359574	0.640047	0.477329
446.524	1	0.414694	0.156676	0.641483	-0.0188954	3.18621		446.547	0	0.711612	0.398965	1.23114	1.37664	0.776549		446.685	1	1.42318	2.22582	1.87663	0.115679	1.00049		446.539	1	0.693416	0.590796	NaN	0.919569	3.66399		446.473	-1	1.60567	0.750802	0.369395	0.589321	0.478527
447.024	1	0.420843	0.162967	0.625499	-0.0243226	3.18653		447.047	0	0.796614	0.381374	1.19822	1.41899	0.764162		447.185	1	1.48042	2.20849	1.8165	0.201765	0.970136		447.039	1	0.685099	0.577983	NaN	0.875278	3.81009		446.973	-1	1.63355	0.73529	0.389379	0.537627	0.484071
447.524	1	0.429005	0.171391	0.608335	-0.0236149	3.18173		447.547	1	0.88184	0.352594	1.12583	1.44639	0.730704		447.685	1	1.49975	2.18856	1.76094	0.334587	0.92788		447.539	1	0.660384	0.510421	NaN	0.811115	3.85909		447.473	-1	1.67718	0.72998	0.414617	0.513693	0.508998
448.024	1	0.43669	0.183154	0.581905	-0.0299411	3.16968		448.047	1	0.967199	0.317102	1.02976	1.46482	0.684605		448.185	1	1.46969	2.18693	1.70175	0.425137	0.875621		448.039	1	0.619848	0.455746	NaN	0.741515	3.89127		447.973	-1	1.72473	0.727215	0.441183	0.49665	0.538724
448.524	1	0.449388	0.194865	0.55517	-0.0364568	3.1726		448.547	1	1.00113	0.219214	0.855359	1.4536	0.60738		448.685	1	1.40603	2.19776	1.6401	0.486913	0.816552		448.539	1	0.557927	0.418493	NaN	0.664563	3.90074		448.473	-1	1.7959	0.740874	0.491367	0.495243	0.570041
449.024	1	0.469977	0.206491	0.527953	-0.0432712	3.19911		449.047	1	1.01735	0.0998344	0.65397	1.43216	0.519435		449.185	1	1.31455	2.19896	1.67336	0.554533	0.79266		449.039	1	0.488439	0.367015	NaN	0.645501	3.90255		448.973	-1	1.87215	0.752169	0.542844	0.506234	0.592888
449.524	1	0.518942	0.209902	0.493146	-0.0437918	3.19516		449.547	1	0.986249	0.0587957	0.804833	1.41212	0.415489		449.685	1	1.21692	2.19839	1.72861	0.622079	0.777556		449.539	1	0.412634	0.303661	NaN	0.674771	3.89798		449.473	-1	1.96624	0.755156	0.598859	0.560774	0.585984
450.024	1	0.583637	0.208483	0.456791	-0.0393882	3.17288		450.047	1	0.947083	0.0325648	0.97733	1.39729	0.331749		450.185	1	1.13347	2.21497	1.76994	0.639176	0.779217		450.039	1	0.337396	0.268234	NaN	0.705305	3.84851		449.973	-1	2.11625	0.762891	0.678508	0.636435	0.578164
450.524	1	0.628771	0.210531	0.446961	-0.0278286	3.16008		450.547	1	0.90059	0.0201319	1.16011	1.38837	0.271936		450.685	1	1.06145	2.22839	1.81038	0.666366	0.783535		450.539	1	0.26256	0.252619	NaN	0.736737	3.76719		450.473	-1	2.37401	0.779778	0.80371	0.752806	0.568581
451.024	1	0.669921	0.209093	0.434216	-0.016051	3.11692		451.047	1	0.903976	0.0100799	1.17964	1.39078	0.21053		451.185	1	1.02319	2.23248	1.84822	0.723385	0.795705		451.039	1	0.210523	0.230333	NaN	0.771155	3.66444		450.973	-1	2.66995	0.788744	0.925252	0.924371	0.553939
451.524	1	0.702942	0.200538	0.415519	-0.00382827	3.01179		451.547	1	0.930383	0.00112676	1.1238	1.39841	0.148388		451.685	1	0.997767	2.23378	1.83708	0.779265	0.801657		451.539	1	0.177156	0.211838	NaN	0.805971	3.552		451.473	-1	2.99567	0.791532	1.04394	1.13899	0.535352
452.024	1	0.758274	0.197949	0.417359	0.00382827	3.01182		452.047	1	1.0222	-0.0188961	1.09238	1.43806	0.134542		452.185	1	0.98736	2.23183	1.76864	0.833815	0.800332		452.039	1	0.176688	0.206888	NaN	0.839967	3.42832		451.973	0	3.30223	0.794093	1.13331	1.39641	0.532328
452.524	1	0.832233	0.200279	0.435886	0.00841497	3.11031		452.547	1	1.11785	-0.038283	1.09276	1.46255	0.139594		452.685	1	0.988665	2.21578	1.67225	0.867242	0.785925		452.539	1	0.18798	0.199063	NaN	0.879547	3.30435		452.473	0	3.60344	0.796589	1.21448	1.66581	0.533657
453.024	1	0.86945	0.190866	0.405843	0.0443502	3.3782		453.047	1	1.19162	-0.0449158	1.29921	1.35611	0.241826		453.185	1	0.994367	2.19445	1.56536	0.892738	0.766605		453.039	1	0.210818	0.188414	NaN	0.92461	3.18009		452.973	1	3.7153	0.763086	1.22264	1.94922	0.510171
453.524	1	0.888671	0.184743	0.375979	0.0717744	3.63534		453.547	1	1.25827	-0.0481012	1.52226	1.24283	0.358578		453.685	1	0.971022	2.17497	1.44064	0.874049	0.734585		453.539	1	0.220305	0.16684	NaN	0.947195	3.10166		453.473	1	3.80175	0.729255	1.22783	2.22664	0.485795
454.024	1	0.890492	0.181803	0.346288	0.090969	3.88207		454.047	1	1.30018	-0.0393164	1.80297	1.10576	0.525751		454.185	1	0.945767	2.15735	1.32291	0.852297	0.70225		454.039	1	0.228097	0.149562	NaN	0.964664	3.01464		453.973	1	3.69418	0.698423	1.21862	2.44869	0.457624
454.524	1	0.829238	0.173129	0.291568	0.107829	3.88249		454.547	0	1.31708	-0.0241607	2.04923	0.961839	0.657438		454.685	1	0.918324	2.14809	1.24232	0.82647	0.67141		454.539	1	0.232855	0.144032	NaN	0.971362	2.90198		454.473	1	3.55682	0.669333	1.20554	2.65502	0.428944
455.024	1	0.744417	0.162313	0.227498	0.123817	3.7909		455.047	0	1.30272	-0.00104009	2.25243	0.809357	0.74476		455.185	1	0.883899	2.14256	1.18711	0.814881	0.646441		455.039	1	0.248716	0.111739	NaN	0.968316	2.83522		454.973	1	3.35639	0.643932	1.18424	2.82804	0.399184
455.524	1	0.667206	0.150648	0.232778	0.148341	3.57282		455.547	-1	1.20494	0.0180168	2.31963	0.762178	0.770655		455.685	1	0.839025	2.1426	1.16987	0.824595	0.630257		455.539	1	0.276158	0.0515217	NaN	0.955105	2.81637		455.473	1	3.1139	0.62607	1.15399	2.95656	0.373493
456.024	1	0.599417	0.133623	0.248974	0.179379	3.3348		456.047	-1	1.06475	0.035008	2.31771	0.768524	0.765328		456.185	1	0.8107	2.15283	1.18093	0.843556	0.617216		456.039	1	0.29753	0.0204755	NaN	0.947425	2.7959		455.973	1	2.83586	0.61458	1.11618	3.04749	0.35124
456.524	1	0.550055	0.105719	0.279695	0.22279	3.07021		456.547	-1	0.915039	0.0654414	2.16123	0.790937	0.705677		456.685	1	0.791659	2.16878	1.20786	0.867705	0.60594		456.539	1	0.316118	0.00280621	NaN	0.942283	2.7747		456.473	1	2.61415	0.59925	1.08237	3.15005	0.332328
457.024	1	0.507773	0.0754721	0.324026	0.267274	2.91548		457.047	-1	0.766143	0.0999606	1.9706	0.814167	0.642139		457.185	1	0.770421	2.16622	1.24515	0.888691	0.57354		457.039	1	0.356616	-0.0062498	NaN	0.917229	2.8003		456.973	1	2.41012	0.582714	1.0498	3.25625	0.314463
457.524	1	0.471315	0.0432959	0.379555	0.31264	2.85113		457.547	-1	0.634818	0.154678	1.65799	0.826583	0.605514		457.685	1	0.749041	2.15982	1.28239	0.902942	0.537457		457.539	1	0.402067	-0.0101739	NaN	0.888152	2.83547		457.473	1	2.26294	0.566135	1.02473	3.32147	0.299386
458.024	1	0.429964	0.0202411	0.417562	0.36474	2.74586		458.047	-1	0.558471	0.212416	1.37949	0.831744	0.568873		458.185	1	0.730263	2.14516	1.29907	0.846445	0.499965		458.039	1	0.439853	0.0501791	NaN	0.876072	2.83313		457.973	1	2.13409	0.548924	1.00283	3.37406	0.284703
458.524	1	0.386992	-2.85153e-05	0.450339	0.419523	2.62829		458.547	-1	0.60752	0.277044	1.17876	0.820357	0.532198		458.685	1	0.704238	2.12617	1.3094	0.783276	0.46347		458.539	1	0.478828	0.0953415	NaN	0.856731	2.84043		458.473	1	2.0992	0.526204	0.999965	3.36399	0.270175
459.024	1	0.328302	-0.017011	0.490194	0.545594	2.51814		459.047	-1	0.672198	0.344982	0.934829	0.812186	0.513487		459.185	1	0.645598	2.08768	1.2911	0.690077	0.431467		459.039	1	0.520792	0.102281	NaN	0.819116	2.87198		458.973	1	2.07952	0.501211	0.99183	3.33321	0.259703
459.524	1	0.271829	-0.0332332	0.531323	0.654547	2.39905		459.547	-1	0.751107	0.415933	0.65155	0.806944	0.511134		459.685	1	0.592533	2.05801	1.26439	0.60406	0.404736		459.539	1	0.525093	0.100993	NaN	0.794694	2.91952		459.473	1	2.09197	0.471417	0.972571	3.25872	0.257791
460.024	1	0.223803	-0.0465566	0.577306	0.698236	2.24589		460.047	-1	0.797019	0.509869	0.409817	0.79202	0.480162		460.185	1	0.548172	2.0421	1.22456	0.529258	0.386238		460.039	1	0.492477	0.0916382	NaN	0.783204	2.98275		459.973	1	2.11721	0.467001	0.944245	3.19087	0.263978
460.524	1	0.186072	-0.0628157	0.624544	0.762623	2.07392		460.547	-1	0.831566	0.611721	0.182394	0.773761	0.439331		460.685	1	0.518274	2.02774	1.23264	0.489734	0.370123		460.539	1	0.447006	0.079343	NaN	0.770231	3.05207		460.473	1	2.15859	0.494597	0.904483	3.13141	0.280378
461.024	1	0.169451	-0.0850949	0.674355	0.869453	1.86337		461.047	-1	0.873347	0.710418	-0.144142	0.779212	0.394404		461.185	1	0.497773	2.01438	1.27185	0.473128	0.355557		461.039	1	0.396663	0.0659336	NaN	0.756697	3.12369		460.973	1	2.07354	0.548823	0.842769	3.01641	0.265287
461.524	1	0.179502	-0.0757467	0.729756	0.930529	1.70077		461.547	-1	0.922324	0.808853	-0.422023	0.784312	0.344858		461.685	1	0.530053	1.99802	1.3426	0.475079	0.338899		461.539	1	0.313305	0.0534097	NaN	0.753519	3.20587		461.473	1	1.92904	0.615569	0.770735	2.87532	0.235389
462.024	1	0.211553	-0.0403116	0.789769	0.953866	1.57772		462.047	-1	1.00626	0.90656	-0.435928	0.783226	0.272766		462.185	1	0.571191	1.98076	1.42015	0.479828	0.322527		462.039	1	0.236922	0.0383322	NaN	0.750925	3.28025		461.973	0	1.71369	0.707717	0.730362	2.72273	0.195401
462.524	1	0.254771	-0.0134414	0.859611	1.04846	1.48046		462.547	-1	1.09792	0.989734	-0.387316	0.804944	0.227755		462.685	1	0.587543	1.95837	1.50794	0.470628	0.317678		462.539	1	0.216986	0.00785349	NaN	0.746878	3.30393		462.473	-1	1.48383	0.797043	0.698042	2.56196	0.153216
463.024	1	0.301726	0.0105615	0.932744	1.16691	1.39184		463.047	-1	1.201	1.0514	-0.24617	0.860415	0.222831		463.185	1	0.596392	1.93768	1.581	0.463841	0.31271		463.039	1	0.192157	-0.0189211	NaN	0.74566	3.34917		462.973	-1	1.20843	0.848853	0.696548	2.3547	0.103681
463.524	1	0.376281	0.0490341	1.0151	1.24703	1.33032		463.547	-1	1.30162	1.11302	-0.0706432	0.903944	0.219428		463.685	1	0.566257	1.92583	1.57746	0.469595	0.307128		463.539	1	0.158048	-0.0386695	NaN	0.749805	3.43531		463.473	-1	1.03789	0.893043	0.704742	2.18604	0.0718506
464.024	1	0.456272	0.0862888	1.09536	1.32367	1.27107		464.047	-1	1.40076	1.17462	0.125441	0.940333	0.216935		464.185	1	0.529926	1.91532	1.56521	0.468983	0.31996		464.039	1	0.136109	-0.0416199	NaN	0.80506	3.42252		463.973	-1	1.06139	0.923128	0.730864	2.08883	0.0727863
464.524	1	0.548804	0.0884763	1.13988	1.42459	1.1927		464.547	-1	1.4548	1.22996	0.236375	1.01403	0.227818		464.685	1	0.48332	1.90704	1.53848	0.457817	0.363323		464.539	1	0.123546	-0.0316268	NaN	0.899697	3.33349		464.473	-1	1.11354	0.947501	0.745309	1.99252	0.0769045
465.024	1	0.632223	0.0945205	1.17025	1.51558	1.12157		465.047	-1	1.50056	1.28414	0.331665	1.09458	0.241158		465.185	1	0.440011	1.89999	1.51422	0.478978	0.401234		465.039	1	0.0915455	-0.00648812	NaN	1.01608	3.28813		464.973	-1	1.19813	0.965408	0.746533	1.89725	0.0846259
465.524	1	0.69702	0.108445	1.17173	1.58626	1.06524		465.547	-1	1.59504	1.3472	0.374783	1.15683	0.243295		465.685	1	0.398884	1.89375	1.49158	0.521528	0.435537		465.539	1	0.0548129	0.0223382	NaN	1.13775	3.25341		465.473	-1	1.42528	0.913828	0.722837	1.79062	0.0811374
466.024	1	0.751831	0.117033	1.16627	1.6328	1.00354		466.047	-1	1.69277	1.40925	0.409566	1.22034	0.243452		466.185	1	0.380149	1.88074	1.46588	0.532337	0.460968		466.039	1	0.0205048	0.053235	NaN	1.29928	3.12004		465.973	-1	1.71088	0.833756	0.688923	1.67932	0.0730525
466.524	1	0.794378	0.119067	1.15229	1.64967	0.935245		466.547	-1	1.79309	1.46236	0.412852	1.29747	0.235722		466.685	1	0.370036	1.86512	1.43899	0.530924	0.482984		466.539	1	-0.009643	0.082394	NaN	1.45955	3.00265		466.473	-1	1.96774	0.773676	0.659528	1.5795	0.0671284
467.024	1	0.827147	0.118486	1.13787	1.65505	0.889788		467.047	-1	1.87733	1.50474	0.484865	1.35687	0.232134		467.185	1	0.346664	1.85254	1.40144	0.542352	0.458355		467.039	1	-0.0198023	0.101966	NaN	1.59742	3.0054		466.973	0	2.25078	0.719171	0.626239	1.50883	0.0615708
467.524	1	0.856972	0.117117	1.12332	1.65698	0.851206		467.547	-1	1.93357	1.52843	0.676549	1.38541	0.235759		467.685	1	0.325361	1.84096	1.36118	0.544974	0.436175		467.539	1	-0.0209247	0.12115	NaN	1.73403	3.00144		467.473	0	2.69439	0.688588	0.568976	1.59993	0.0572524
468.024	1	0.880075	0.115073	1.09825	1.63803	0.81926		468.047	-1	1.95735	1.53929	0.842485	1.40003	0.237186		468.185	1	0.315146	1.83318	1.31114	0.507861	0.43242		468.039	1	-0.00758683	0.139713	NaN	1.86859	2.98678		467.973	1	3.09093	0.69024	0.524196	1.69503	0.059127
468.524	1	0.902339	0.112944	1.07186	1.61647	0.788143		468.547	-1	1.95803	1.54102	0.990078	1.40475	0.237046		468.685	1	0.31004	1.82684	1.26423	0.490017	0.433135		468.539	1	0.00652945	0.15139	NaN	2.00023	2.95611		468.473	1	3.40874	0.7458	0.500293	1.79681	0.0713582
469.024	1	0.967054	0.0913514	1.04989	1.8251	0.820329		469.047	-1	1.87682	1.5634	1.1232	1.45521	0.221335		469.185	1	0.311702	1.82238	1.22146	0.497693	0.439771		469.039	1	0.0212021	0.158145	NaN	2.12977	2.91401		468.973	1	3.69208	0.778535	0.473327	1.91903	0.0821294
469.524	1	1.02603	0.0691373	1.01824	2.02441	0.857408		469.547	-1	1.77542	1.59086	1.25189	1.51689	0.201675		469.685	1	0.320016	1.81756	1.18632	0.501272	0.446024		469.539	1	0.0267885	0.171666	NaN	2.24047	2.82876		469.473	1	3.95064	0.794864	0.444159	2.05594	0.0918511
470.024	1	1.06401	0.0455861	0.953782	2.18336	0.908518		470.047	-1	1.62802	1.62839	1.19912	1.59222	0.151892		470.185	1	0.333622	1.81244	1.15725	0.501592	0.451971		470.039	1	0.029993	0.186909	NaN	2.34579	2.73179		469.973	1	4.05165	0.799516	0.454863	2.0474	0.079405
470.524	1	1.11111	0.0395406	0.888303	2.35321	0.9811		470.547	-1	1.47996	1.66271	1.242	1.67431	0.100668		470.685	1	0.345029	1.81057	1.12678	0.529807	0.45088		470.539	1	0.0501274	0.180151	NaN	2.40704	2.64014		470.473	1	4.11543	0.8019	0.475435	2.00507	0.0624376
471.024	1	1.1694	0.0549949	0.821565	2.53646	1.08005		471.047	-1	1.32989	1.6871	1.57995	1.77725	0.0449968		471.185	1	0.355824	1.8096	1.09591	0.565789	0.447829		471.039	1	0.0738886	0.170981	NaN	2.45393	2.55268		470.973	1	4.13552	0.814397	0.519271	1.93823	0.058838
471.524	1	1.19552	0.0863403	0.733102	2.44067	1.10602		471.547	-1	1.1975	1.69549	1.97431	1.88222	0.0222276		471.685	1	0.357335	1.80162	1.10422	0.590317	0.451113		471.539	1	0.110099	0.153533	NaN	2.45154	2.47958		471.473	1	4.12526	0.835256	0.605398	1.89029	0.0684851
472.024	1	1.21913	0.118399	0.65002	2.31079	1.12832		472.047	-1	1.08541	1.68551	2.43342	1.98952	0.0372217		472.185	1	0.358484	1.79427	1.11313	0.616733	0.455004		472.039	1	0.155464	0.141758	NaN	2.42604	2.43353		471.973	1	4.02958	0.879644	0.810525	1.89553	0.115407
472.524	1	1.24285	0.147383	0.607667	2.11091	1.16243		472.547	-1	1.02961	1.69828	2.84764	2.05556	0.0824185		472.685	1	0.356547	1.79298	1.12635	0.661212	0.464385		472.539	1	0.206415	0.133514	NaN	2.38635	2.40351		472.473	1	3.91564	0.90654	1.02326	1.91177	0.172115
473.024	1	1.26306	0.163176	0.563207	1.91468	1.19951		473.047	-1	0.999747	1.72153	3.2412	2.10258	0.14153		473.185	1	0.354787	1.79148	1.14112	0.695518	0.471342		473.039	1	0.261103	0.130219	NaN	2.33453	2.36698		472.973	1	3.77981	0.912465	1.24511	1.94122	0.240554
473.524	1	1.27676	0.154406	0.514823	1.72526	1.24211		473.547	-1	0.938986	1.69526	3.33179	2.01039	0.189513		473.685	1	0.353384	1.78957	1.15902	0.709228	0.47339		473.539	1	0.316933	0.131354	NaN	2.28194	2.32966		473.473	1	3.61144	0.900889	1.44275	2.05494	0.291736
474.024	1	1.27907	0.145091	0.477673	1.55003	1.30111		474.047	-1	0.88051	1.66621	3.36462	1.89132	0.231356		474.185	1	0.36067	1.78792	1.16826	0.717174	0.472647		474.039	1	0.379515	0.158654	NaN	2.2248	2.28768		473.973	1	3.42775	0.881069	1.62897	2.20836	0.334789
474.524	1	1.26841	0.135153	0.453333	1.391	1.37881		474.547	-1	0.900302	1.69174	3.28411	1.71646	0.224876		474.685	1	0.374889	1.78648	1.17061	0.720521	0.469675		474.539	1	0.419792	0.181451	NaN	2.18032	2.24734		474.473	1	3.228	0.842843	1.67557	2.32499	0.335253
475.024	1	1.25409	0.128432	0.439555	1.30128	1.45831		475.047	-1	0.913826	1.71059	3.09821	1.55048	0.205534		475.185	1	0.408402	1.78056	1.18037	0.711618	0.46624		475.039	1	0.42444	0.197056	NaN	2.15604	2.20959		474.973	1	3.02432	0.800101	1.68791	2.43259	0.325269
475.524	1	1.23812	0.123162	0.430544	1.24284	1.53862		475.547	-1	0.912997	1.71415	2.671	1.40482	0.156747		475.685	1	0.447875	1.77326	1.19242	0.69893	0.462663		475.539	1	0.405632	0.230844	NaN	2.14484	2.16577		475.473	1	2.75808	0.773274	1.66335	2.56706	0.306576
476.024	1	1.2234	0.11982	0.449167	1.20102	1.62417		476.047	-1	0.955818	1.74987	2.24657	1.32343	0.121508		476.185	1	0.50793	1.76525	1.22594	0.685155	0.465162		476.039	1	0.354878	0.289397	NaN	2.15144	2.11369		475.973	1	2.48492	0.748917	1.63102	2.70286	0.287516
476.524	1	1.20988	0.116736	0.469826	1.16117	1.7126		476.547	-1	1.03829	1.81482	1.82466	1.30044	0.0985768		476.685	1	0.573312	1.75737	1.26255	0.672073	0.468897		476.539	1	0.312575	0.324692	NaN	2.1719	2.06471		476.473	1	2.20431	0.73446	1.55276	2.82322	0.274157
477.024	1	1.20502	0.114167	0.484393	1.12382	1.82013		477.047	-1	1.10902	1.85959	1.43732	1.26833	0.0780119		477.185	1	0.659123	1.75177	1.2974	0.667082	0.47549		477.039	1	0.274522	0.348292	NaN	2.19934	2.01727		476.973	1	1.93176	0.720157	1.47462	2.944	0.262596
477.524	1	1.19111	0.113562	0.500893	1.09947	1.90778		477.547	-1	1.17573	1.89744	1.06183	1.23309	0.0582588		477.685	1	0.731239	1.74919	1.32776	0.666979	0.480147		477.539	1	0.272317	0.348764	NaN	2.19539	1.88602		477.473	1	1.69368	0.706511	1.397	3.06656	0.258716
478.024	1	1.16922	0.114534	0.519006	1.08541	1.97615		478.047	-1	1.18536	1.89134	1.10691	1.19652	0.0455009		478.185	1	0.774676	1.75293	1.34874	0.677111	0.480751		478.039	1	0.281283	0.342028	NaN	2.18165	1.72863		477.973	1	1.49352	0.694151	1.32266	3.18411	0.258882
478.524	1	1.14944	0.109791	0.533542	1.02882	1.98941		478.547	-1	1.19385	1.88724	1.179	1.16121	0.0331478		478.685	1	0.840055	1.75869	1.36046	0.67609	0.45924		478.539	1	0.277175	0.360945	NaN	2.15517	1.5549		478.473	1	1.34787	0.683642	1.25303	3.29448	0.264864
479.024	1	1.12773	0.107689	0.548109	0.975915	2.00777		479.047	-1	1.21379	1.92331	1.37074	1.14015	0.0222993		479.185	1	0.924047	1.76618	1.36432	0.665607	0.418965		479.039	1	0.275632	0.377378	NaN	2.12424	1.37913		478.973	1	1.22383	0.671033	1.2034	3.38128	0.264392
479.524	1	1.09497	0.120771	0.562861	0.944145	2.05544		479.547	-1	1.21128	1.94368	1.57048	1.12329	0.014693		479.685	1	0.944207	1.76247	1.36331	0.658284	0.374447		479.539	1	0.286243	0.381186	NaN	2.07453	1.19552		479.473	1	1.11191	0.657246	1.165	3.45487	0.260303
480.024	1	1.06308	0.132106	0.570774	0.912347	2.11156		480.047	-1	1.1576	1.92828	1.78842	1.11599	0.0144747		480.185	1	0.944714	1.75532	1.36081	0.651933	0.328622		480.039	1	0.297083	0.387204	NaN	2.04007	1.04984		479.973	1	1.03088	0.645121	1.13305	3.52603	0.254121
480.524	1	1.03269	0.140451	0.566991	0.880501	2.18213		480.547	-1	1.12843	1.92051	1.97276	1.11725	0.0207416		480.685	1	0.950777	1.74081	1.36117	0.62686	0.283125		480.539	1	0.3084	0.397805	NaN	2.03725	0.982824		480.473	1	0.954428	0.633242	1.10206	3.59684	0.247629
481.024	1	1.00322	0.155532	0.560786	0.866201	2.25593		481.047	-1	1.12147	1.91964	2.12662	1.12629	0.03289		481.185	0	0.938421	1.72376	1.36382	0.60594	0.244364		481.039	1	0.319705	0.3789	NaN	2.08075	0.947447		480.973	1	0.883977	0.617014	1.07734	3.69586	0.239726
481.524	1	0.974726	0.177765	0.552008	0.870531	2.33318		481.547	-1	1.07272	1.90186	2.20468	1.135	0.0531458		481.685	-1	0.86121	1.69821	1.37435	0.600606	0.229191		481.539	1	0.331001	0.337334	NaN	2.15984	0.936371		481.473	1	0.816806	0.601972	1.05452	3.79563	0.232799
482.024	1	0.942143	0.183109	0.540645	0.860248	2.41043		482.047	-1	1.00645	1.87699	2.25099	1.14357	0.0767974		482.185	-1	0.801508	1.68043	1.38499	0.594537	0.218887		482.039	1	0.298997	0.350729	NaN	2.29576	0.938507		481.973	1	0.762396	0.592134	1.03888	3.89589	0.22996
482.524	1	0.907848	0.181371	0.528198	0.843839	2.48769		482.547	-1	0.961974	1.87166	2.19207	1.15849	0.0836125		482.685	-1	0.763658	1.67234	1.39578	0.587554	0.214659		482.539	1	0.256522	0.378132	NaN	2.44586	0.943662		482.473	1	0.712103	0.579487	1.00934	3.90885	0.231325
483.024	1	0.89177	0.184216	0.536514	0.820837	2.55497		483.047	-1	0.917987	1.87099	2.12347	1.17504	0.0899579		483.185	-1	0.721338	1.66387	1.39808	0.587395	0.202002		483.039	1	0.211723	0.436118	NaN	2.61565	0.942799		482.973	1	0.667714	0.562808	0.959846	3.79661	0.23872
483.524	1	0.878904	0.185799	0.542419	0.80183	2.62028		483.547	-1	0.866473	1.88832	2.04824	1.19823	0.101597		483.685	-1	0.676603	1.65519	1.39578	0.590924	0.18479		483.539	1	0.171784	0.492888	NaN	2.7689	0.937872		483.473	1	0.620032	0.542567	0.908965	3.65287	0.242224
484.024	1	0.876618	0.179878	0.530572	0.804318	2.67873		484.047	-1	0.81151	1.89607	1.94954	1.22335	0.105311		484.185	-1	0.642459	1.64382	1.37752	0.591326	0.17646		484.039	1	0.146791	0.54592	NaN	2.87126	0.920446		483.973	1	0.570482	0.520305	0.857298	3.49127	0.243523
484.524	1	0.875988	0.183781	0.526189	0.812818	2.72464		484.547	-1	0.750553	1.88716	1.81004	1.25181	0.0952464		484.685	-1	0.612241	1.63144	1.35335	0.59057	0.171421		484.539	1	0.125158	0.589971	NaN	2.96692	0.904142		484.473	1	0.541131	0.508045	0.795995	3.3192	0.267029
485.024	1	0.876838	0.196452	0.528468	0.826684	2.75934		485.047	-1	0.693037	1.87239	1.67185	1.27047	0.0895015		485.185	-1	0.609784	1.6205	1.34505	0.583177	0.156792		485.039	1	0.109877	0.617046	NaN	3.0499	0.889961		484.973	1	0.523724	0.493093	0.741031	3.16556	0.292615
485.524	1	0.857163	0.182374	0.540862	0.830907	2.75382		485.547	-1	0.638184	1.85311	1.53468	1.28153	0.0871011		485.685	-1	0.614996	1.61018	1.33995	0.57526	0.14402		485.539	1	0.0939916	0.642536	NaN	3.11854	0.876665		485.473	1	0.587639	0.438659	0.758819	3.1981	0.305191
486.024	1	0.832429	0.163338	0.554529	0.833612	2.73701		486.047	-1	0.59652	1.82611	1.5295	1.31848	0.0686302		486.185	-1	0.650869	1.60247	1.34689	0.566068	0.141474		486.039	1	0.0772208	0.6657	NaN	3.16614	0.864666		485.973	1	0.669273	0.393517	0.77537	3.19465	0.31265
486.524	1	0.780385	0.140297	0.558123	0.840091	2.64002		486.547	-1	0.561535	1.79521	1.59117	1.36855	0.0420201		486.685	-1	0.701554	1.59793	1.35598	0.562366	0.134145		486.539	1	0.0662758	0.68904	NaN	3.22151	0.83465		486.473	1	0.815525	0.382261	0.78741	3.05993	0.301451
487.024	1	0.737067	0.111328	0.559489	0.857686	2.52184		487.047	-1	0.536169	1.75274	1.71075	1.4251	0.0269068		487.185	-1	0.77468	1.59818	1.36834	0.566982	0.11957		487.039	1	0.0578334	0.710139	NaN	3.27614	0.80044		486.973	0	0.94069	0.378533	0.801648	2.90366	0.277129
487.524	1	0.717485	0.0662317	0.554794	0.90552	2.34603		487.547	-1	0.515736	1.707	1.82526	1.48169	0.0143446		487.685	-1	0.843382	1.59877	1.36986	0.573011	0.140817		487.539	1	0.073721	0.680678	NaN	3.27263	0.769514		487.473	0	1.03925	0.384299	0.81866	2.72019	0.236251
488.024	1	0.727834	0.0438633	0.538928	0.955089	2.19696		488.047	-1	0.521235	1.64888	1.85162	1.53275	0.00927117		488.185	-1	0.907671	1.59969	1.36058	0.580451	0.1978		488.039	1	0.108692	0.628471	NaN	3.26306	0.73944		487.973	-1	1.14556	0.429881	0.82066	2.61852	0.191
488.524	1	0.745661	0.029249	0.523035	1.00684	2.06272		488.547	-1	0.531535	1.59059	1.86807	1.57649	0.00878005		488.685	-1	0.933646	1.60224	1.34705	0.58902	0.256675		488.539	1	0.196811	0.512915	NaN	3.2366	0.71174		488.473	-1	1.25929	0.513686	0.80825	2.59538	0.141549
489.024	1	0.748285	0.024231	0.54095	1.07548	1.9978		489.047	-1	0.593115	1.53048	1.77871	1.54204	0.0572386		489.185	-1	0.945935	1.60538	1.33201	0.597993	0.316226		489.039	1	0.273261	0.402888	NaN	3.18594	0.697161		488.973	-1	1.29144	0.571403	0.795222	2.71933	0.120583
489.524	1	0.74531	0.01914	0.564698	1.15618	1.94103		489.547	-1	0.661114	1.46865	1.68046	1.4943	0.0986945		489.685	-1	0.901976	1.60809	1.30837	0.6013	0.387391		489.539	1	0.337332	0.298727	NaN	3.10962	0.696502		489.473	-1	1.28906	0.618078	0.781932	2.90556	0.111674
490.024	1	0.737313	0.0139835	0.593676	1.24769	1.89156		490.047	-1	0.745173	1.40256	1.55996	1.41331	0.122634		490.185	-1	0.855591	1.61076	1.28309	0.606705	0.440166		490.039	1	0.393478	0.202345	NaN	3.04822	0.698734		489.973	-1	1.35296	0.633788	0.792421	3.07861	0.11986
490.524	1	0.710297	0.0154933	0.644972	1.30326	1.83861		490.547	-1	0.828108	1.33568	1.5311	1.37015	0.14945		490.685	-1	0.809674	1.6134	1.2542	0.618866	0.438741		490.539	1	0.444458	0.111034	NaN	2.99656	0.702849		490.473	-1	1.42223	0.646986	0.804838	3.2506	0.129433
491.024	1	0.680917	0.0181028	0.699422	1.34971	1.78581		491.047	-1	0.909851	1.26799	1.5994	1.36708	0.179315		491.185	-1	0.796639	1.61417	1.22675	0.629736	0.408836		491.039	1	0.424245	0.0855211	NaN	2.94626	0.700799		490.973	-1	1.41105	0.640578	0.808492	3.23585	0.156021
491.524	1	0.672595	0.016983	0.734291	1.37341	1.74471		491.547	-1	1.00626	1.2363	1.68956	1.36657	0.169851		491.685	-1	0.799177	1.61404	1.19998	0.639994	0.365442		491.539	1	0.389478	0.0730777	NaN	2.89636	0.697489		491.473	-1	1.39522	0.632858	0.811127	3.19341	0.183198
492.024	1	0.659669	0.0171755	0.76391	1.38821	1.67598		492.047	-1	1.1088	1.2197	1.78888	1.36713	0.143916		492.185	-1	0.807111	1.61278	1.15084	0.649824	0.299179		492.039	1	0.373039	0.0293139	NaN	2.85116	0.695759		491.973	-1	1.44457	0.638865	0.814675	3.09898	0.191871
492.524	1	0.626827	0.0230439	0.770826	1.36451	1.48771		492.547	-1	1.15893	1.22156	1.90362	1.38688	0.139718		492.685	-1	0.816724	1.61116	1.09473	0.65952	0.225796		492.539	1	0.353436	-0.00802753	NaN	2.81454	0.693982		492.473	-1	1.52171	0.644986	0.807723	3.02089	0.200335
493.024	1	0.62072	0.0238233	0.754478	1.38694	1.30459		493.047	-1	1.20375	1.22616	2.01779	1.40643	0.137262		493.185	-1	0.796313	1.61529	1.04658	0.661761	0.152295		493.039	1	0.315138	-0.00743794	NaN	2.82862	0.691927		492.973	-1	1.66015	0.651358	0.777617	2.97884	0.208335
493.524	1	0.633425	0.0248208	0.722382	1.44084	1.1366		493.547	-1	1.20865	1.27977	2.05866	1.35521	0.133166		493.685	-1	0.767493	1.61826	1.0005	0.664635	0.101478		493.539	1	0.275646	-0.00269617	NaN	2.86154	0.6937		493.473	-1	1.82736	0.657444	0.749559	2.94288	0.220536
494.024	1	0.678267	0.0931185	0.674378	1.53093	1.19722		494.047	-1	1.18874	1.32953	2.03976	1.31092	0.124955		494.185	-1	0.706136	1.61671	0.962423	0.670037	0.139062		494.039	1	0.234252	0.00866155	NaN	2.92449	0.701574		493.973	-1	2.01985	0.663277	0.723298	2.91225	0.236428
494.524	1	0.718489	0.151885	0.624418	1.5606	1.30464		494.547	-1	1.08331	1.366	1.81477	1.29056	0.102552		494.685	-1	0.6487	1.61598	0.937643	0.67388	0.185213		494.539	1	0.188952	0.0381606	NaN	2.9914	0.703834		494.473	-1	2.26735	0.658739	0.690156	2.86825	0.253123
495.024	1	0.750065	0.192808	0.570793	1.47716	1.49968		495.047	-1	0.955312	1.40684	1.58298	1.26352	0.0801246		495.185	-1	0.595831	1.61623	0.928349	0.675908	0.241339		495.039	1	0.141313	0.0785166	NaN	3.06067	0.702735		494.973	-1	2.54026	0.651848	0.653954	2.8154	0.269434
495.524	1	0.802063	0.2355	0.517935	1.41539	1.68739		495.547	-1	0.799203	1.45314	1.3427	1.22817	0.0576673		495.685	-1	0.553307	1.61346	0.914919	0.681807	0.296977		495.539	1	0.11311	0.118364	NaN	3.0927	0.713396		495.473	-1	2.84591	0.652318	0.614308	2.73972	0.282028
496.024	1	0.869532	0.279531	0.465658	1.37004	1.86957		496.047	-1	0.679227	1.50072	1.14357	1.19836	0.0356633		496.185	-1	0.516023	1.60916	0.899394	0.689667	0.352368		496.039	1	0.0907221	0.155996	NaN	3.11645	0.725616		495.973	-1	3.15912	0.651172	0.579721	2.66189	0.275828
496.524	1	0.92579	0.292652	0.400549	1.27463	1.9605		496.547	-1	0.577388	1.54894	0.965102	1.17134	0.0138867		496.685	-1	0.508198	1.60649	0.908882	0.693271	0.359707		496.539	1	0.104069	0.149687	NaN	3.13133	0.718649		496.473	-1	3.48291	0.647769	0.552194	2.58107	0.243396
497.024	1	0.972059	0.278229	0.324008	1.13461	1.97012		497.047	-1	0.500839	1.57351	1.0357	1.14776	0.030931		497.185	-1	0.508042	1.60423	0.924979	0.695855	0.354426		497.039	1	0.12902	0.134208	NaN	3.12263	0.714715		496.973	-1	3.82742	0.649029	0.524739	2.47486	0.205652
497.524	1	1.0677	0.296747	0.278307	1.16107	2.029		497.547	-1	0.428211	1.59442	1.1449	1.1247	0.0539925		497.685	-1	0.503164	1.60032	0.944925	0.706398	0.347816		497.539	1	0.186058	0.0933757	NaN	3.04874	0.719172		497.473	-1	4.10525	0.649739	0.505696	2.38019	0.1642
498.024	1	1.12605	0.306404	0.24857	1.15936	2.07331		498.047	-1	0.465722	1.62902	1.32348	1.11768	0.0693473		498.185	-1	0.498471	1.59644	0.964867	0.716856	0.340999		498.039	1	0.231459	0.0512374	NaN	2.9603	0.746243		497.973	-1	4.25259	0.647697	0.502112	2.31624	0.117906
498.524	1	1.12665	0.300669	0.239449	1.10385	2.09268		498.547	-1	0.50651	1.66351	1.43956	1.10941	0.0845639		498.685	-1	0.497213	1.59326	0.984747	0.725724	0.330375		498.539	1	0.264562	0.00771904	NaN	2.85649	0.797213		498.473	-1	4.3359	0.656506	0.509267	2.30324	0.0943615
499.024	1	1.17137	0.299553	0.263383	1.0648	2.1302		499.047	-1	0.553487	1.6967	1.30973	1.09534	0.0996997		499.185	-1	0.478194	1.59133	0.981673	0.739458	0.319592		499.039	1	0.270735	-0.0178705	NaN	2.73614	0.805655		498.973	-1	4.40762	0.667278	0.518364	2.29944	0.0749331
499.524	1	1.21243	0.29777	0.285646	1.02147	2.14775		499.547	-1	0.611541	1.72096	1.11752	1.08723	0.120404		499.685	-1	0.44559	1.59036	0.961042	0.756916	0.308685		499.539	1	0.269323	-0.0244448	NaN	2.61987	0.796974		499.473	-1	4.37777	0.671649	0.560939	2.35153	0.0583898
500.024	1	1.23581	0.293652	0.296495	0.966558	2.1265		500.047	-1	0.69258	1.72669	0.795859	1.09148	0.152662		500.185	-1	0.426437	1.59086	0.925591	0.767695	0.308839		500.039	1	0.283036	0.0408584	NaN	2.56411	0.781993		499.973	-1	4.29155	0.678067	0.611128	2.39758	0.0379856
500.524	1	1.28095	0.298328	0.287349	0.920238	2.13308		500.547	-1	0.761732	1.71513	0.511864	1.09116	0.195165		500.685	-1	0.410829	1.59176	0.886235	0.776714	0.311908		500.539	1	0.316032	0.0668497	NaN	2.52795	0.728828		500.473	-1	4.07962	0.689245	0.67791	2.42886	0.00877665
501.024	1	1.3357	0.306919	0.268281	0.877097	2.15734		501.047	-1	0.820967	1.68914	0.259286	1.08701	0.246214		501.185	-1	0.386987	1.59023	0.8454	0.787221	0.285887		501.039	1	0.357521	0.0721404	NaN	2.50159	0.656093		500.973	-1	3.81048	0.68542	0.708889	2.42505	-0.00830009
501.524	1	1.37861	0.311055	0.248821	0.822891	2.2221		501.547	-1	0.874667	1.65858	0.266427	1.06877	0.294478		501.685	-1	0.363507	1.58833	0.805443	0.797067	0.259229		501.539	1	0.373171	0.101486	NaN	2.45898	0.611267		501.473	-1	3.55516	0.682422	0.723612	2.40437	-0.0182478
502.024	1	1.41168	0.314599	0.234898	0.764468	2.29503		502.047	-1	0.925587	1.62573	0.404053	1.04346	0.341343		502.185	-1	0.343853	1.58323	0.773485	0.800862	0.228783		502.039	1	0.376814	0.112317	NaN	2.40457	0.558778		501.973	-1	3.36573	0.690357	0.723079	2.36659	-0.0193503
502.524	1	1.42795	0.317135	0.230419	0.698852	2.3819		502.547	-1	0.913283	1.61796	0.602067	1.00763	0.365295		502.685	-1	0.333627	1.58204	0.74345	0.805861	0.194197		502.539	1	0.355588	0.0847953	NaN	2.32571	0.490422		502.473	-1	3.30138	0.705705	0.723174	2.32695	-0.0151244
503.024	1	1.38922	0.320451	0.234664	0.649142	2.48536		503.047	-1	0.891779	1.61767	0.810014	0.97479	0.38427		503.185	-1	0.343736	1.58926	0.717566	0.813457	0.15068		503.039	1	0.331896	0.0812467	NaN	2.23413	0.432963		502.973	-1	3.34965	0.727728	0.723833	2.28565	-0.00610082
503.524	1	1.33418	0.323838	0.241869	0.605257	2.58953		503.547	-1	0.861337	1.65371	1.03627	0.978999	0.385993		503.685	-1	0.369583	1.59087	0.713547	0.8226	0.114016		503.539	1	0.312309	0.0865606	NaN	2.13396	0.391643		503.473	-1	3.4959	0.752557	0.738689	2.23897	0.00394714
504.024	1	1.2816	0.325016	0.253766	0.575687	2.63616		504.047	-1	0.820747	1.69134	1.19476	0.993501	0.382735		504.185	-1	0.40842	1.58785	0.727579	0.83302	0.0830086		504.039	1	0.328125	0.0842109	NaN	2.01099	0.430379		503.973	-1	3.68555	0.77863	0.759835	2.1899	0.0144489
504.524	1	1.22715	0.329941	0.269556	0.554656	2.6927		504.547	-1	0.759081	1.73229	1.21248	1.02938	0.36913		504.685	-1	0.451786	1.5855	0.71919	0.842332	0.0554335		504.539	1	0.324743	0.0924414	NaN	1.91556	0.494938		504.473	-1	3.88362	0.788959	0.773431	2.12416	0.0191432
505.024	1	1.16951	0.341275	0.292004	0.548226	2.76617		505.047	-1	0.710409	1.76765	1.20993	1.06898	0.35053		505.185	-1	0.497421	1.58347	0.699578	0.851089	0.0295764		505.039	1	0.308847	0.107568	NaN	1.83807	0.576327		504.973	-1	4.04101	0.793043	0.779867	2.02117	0.0227227
505.524	1	1.12639	0.340197	0.30575	0.569978	2.74139		505.547	-1	0.672551	1.79837	1.19049	1.11169	0.327774		505.685	0	0.547447	1.57439	0.690641	0.866599	0.00199845		505.539	1	0.257912	0.126285	NaN	1.77099	0.699237		505.473	-1	4.07242	0.788414	0.769759	1.81805	0.0266192
506.024	1	1.09043	0.333001	0.315206	0.605623	2.66816		506.047	-1	0.651277	1.79822	1.08555	1.13036	0.31397		506.185	0	0.594274	1.56494	0.681102	0.882908	-0.0237886		506.039	1	0.199705	0.145639	NaN	1.70649	0.829818		505.973	-1	4.00627	0.781408	0.746868	1.62444	0.0277311
506.524	1	0.989277	0.299646	0.328479	0.627739	2.4675		506.547	-1	0.635081	1.78863	0.954418	1.14165	0.302907		506.685	1	0.597576	1.56157	0.648742	0.898429	-0.0263133		506.539	1	0.146245	0.160551	NaN	1.65547	0.919884		506.473	-1	3.83476	0.771833	0.710173	1.44109	0.0258361
507.024	1	0.896778	0.267764	0.345626	0.649461	2.24303		507.047	-1	0.617688	1.76358	0.909433	1.14867	0.299984		507.185	1	0.602689	1.55832	0.622822	0.914168	-0.0300879		507.039	1	0.0935495	0.173172	NaN	1.60696	0.999856		506.973	-1	3.62007	0.767805	0.676819	1.27276	0.0272912
507.524	1	0.837307	0.243696	0.372753	0.672077	1.97231		507.547	-1	0.600138	1.73653	0.875642	1.15513	0.298118		507.685	1	0.615391	1.55561	0.623903	0.930818	-0.0391017		507.539	1	0.0447037	0.174245	NaN	1.57104	1.02897		507.473	-1	3.38724	0.766107	0.644868	1.11074	0.0301536
508.024	1	0.848448	0.235962	0.410203	0.615884	1.77194		508.047	-1	0.671214	1.65151	0.822655	1.17495	0.329405		508.185	1	0.615031	1.55115	0.631885	0.944196	-0.0461923		508.039	1	0.0304338	0.179023	NaN	1.52352	1.07908		507.973	-1	3.09199	0.755742	0.617634	1.07789	0.032577
508.524	1	0.887534	0.239043	0.445275	0.564162	1.6303		508.547	-1	0.730792	1.57063	0.805692	1.19391	0.35322		508.685	1	0.596044	1.5442	0.649707	0.952907	-0.0505402		508.539	1	0.035111	0.185833	NaN	1.46964	1.14071		508.473	-1	2.78595	0.743695	0.590726	1.07185	0.0350832
509.024	1	0.939281	0.25815	0.462748	0.605632	1.59429		509.047	-1	0.740357	1.50942	0.92881	1.20868	0.34611		509.185	1	0.587582	1.53902	0.665173	0.960078	-0.00192008		509.039	1	0.0491789	0.178479	NaN	1.43138	1.18683		508.973	-1	2.50816	0.732765	0.554073	1.07632	0.040246
509.524	0	0.980081	0.249163	0.470487	0.597826	1.53908		509.547	-1	0.758034	1.4423	1.02688	1.22064	0.345738		509.685	1	0.585403	1.53491	0.679233	0.96633	0.0783183		509.539	1	0.067655	0.174825	NaN	1.39675	1.24544		509.473	-1	2.25005	0.725628	0.522629	1.08843	0.049326
510.024	0	1.00849	0.208368	0.467205	0.534233	1.46216		510.047	-1	0.785861	1.36778	1.09362	1.2291	0.353799		510.185	1	0.582875	1.53393	0.680507	0.969573	0.16121		510.039	1	0.0934612	0.179727	NaN	1.36734	1.3294		509.973	-1	2.04418	0.728561	0.505017	1.12086	0.0688057
510.524	-1	0.99167	0.169213	0.426107	0.523154	1.41965		510.547	-1	0.779282	1.33265	1.19068	1.23368	0.338735		510.685	1	0.580215	1.53413	0.676975	0.971685	0.2451		510.539	1	0.111681	0.1601	NaN	1.33414	1.31169		510.473	-1	1.97669	0.732813	0.504989	1.13921	0.104943
511.024	-1	0.961074	0.131353	0.379566	0.482103	1.39773		511.047	-1	0.752058	1.32116	1.30592	1.23593	0.309795		511.185	1	0.570003	1.52338	0.672216	0.973355	0.342832		511.039	1	0.127575	0.132954	NaN	1.29978	1.26282		510.973	-1	2.06302	0.738531	0.524506	1.14193	0.159596
511.524	-1	0.916527	0.0949753	0.328826	0.40079	1.39885		511.547	-1	0.77073	1.29841	1.51177	1.24377	0.290883		511.685	1	0.56416	1.51241	0.668051	0.974444	0.427203		511.539	1	0.142898	0.184555	NaN	1.27682	1.24281		511.473	-1	2.21972	0.74677	0.550586	1.14498	0.206188
512.024	-1	0.849016	0.0939041	0.25996	0.411743	1.32746		512.047	-1	0.795616	1.27293	1.73346	1.25232	0.273076		512.185	1	0.585366	1.50411	0.667631	0.972456	0.43223		512.039	1	0.155936	0.241775	NaN	1.25249	1.2235		511.973	-1	2.49173	0.759139	0.587419	1.14857	0.23957
512.524	-1	0.774027	0.102755	0.194752	0.434916	1.26672		512.547	-1	0.788995	1.23778	1.94414	1.2564	0.244782		512.685	1	0.612625	1.49587	0.66905	0.972557	0.437341		512.539	1	0.16378	0.309159	NaN	1.22464	1.2048		512.473	-1	2.79528	0.757162	0.640158	1.16597	0.260175
513.024	-1	0.689281	0.123908	0.138232	0.466729	1.23393		513.047	0	0.784509	1.19948	2.15775	1.25916	0.216026		513.185	1	0.656549	1.48776	0.67553	0.978409	0.442681		513.039	1	0.161622	0.387209	NaN	1.22387	1.19417		512.973	-1	3.11942	0.745827	0.703273	1.19237	0.272445
513.524	-1	0.665663	0.149901	0.111061	0.438561	1.15012		513.547	0	0.798028	1.13455	2.39615	1.2507	0.183369		513.685	1	0.704966	1.48347	0.675266	0.983234	0.442504		513.539	1	0.153474	0.471648	NaN	1.23931	1.18838		513.473	-1	3.20467	0.728888	0.750057	1.23594	0.233057
514.024	-1	0.653524	0.177521	0.0877533	0.402777	1.06672		514.047	1	0.814254	1.06994	2.58352	1.24156	0.155596		514.185	1	0.758788	1.48374	0.666891	0.986825	0.435692		514.039	1	0.140622	0.486178	NaN	1.22788	1.17554		513.973	-1	3.23258	0.711155	0.794064	1.28656	0.186031
514.524	-1	0.635034	0.208741	0.0519745	0.39406	1.04574		514.547	1	0.839815	1.00645	2.59497	1.23008	0.144669		514.685	1	0.811581	1.48511	0.661738	0.990783	0.429481		514.539	0	0.128451	0.478744	NaN	1.21621	1.15967		514.473	-1	3.11902	0.696884	0.842454	1.38339	0.166985
515.024	-1	0.612092	0.241259	0.0197956	0.377685	1.04706		515.047	1	0.877758	0.95532	2.65468	1.22246	0.137869		515.185	1	0.862163	1.48882	0.663515	0.995531	0.424562		515.039	0	0.120067	0.454742	NaN	1.21681	1.14027		514.973	-1	2.96087	0.686085	0.892043	1.46889	0.143688
515.524	-1	0.583695	0.275365	-0.00797307	0.351926	1.07573		515.547	1	0.932386	0.920846	2.77943	1.22006	0.136631		515.685	1	0.904426	1.4881	0.677329	0.995593	0.424749		515.539	-1	0.129541	0.425788	NaN	1.19223	1.11628		515.473	-1	2.60788	0.690457	0.946873	1.50488	0.101812
516.024	-1	0.516126	0.294094	-0.0338504	0.374349	1.1768		516.047	1	0.953551	0.884937	2.88105	1.2172	0.134747		516.185	1	0.939162	1.48335	0.702031	0.991417	0.429556		516.039	-1	0.145097	0.395148	NaN	1.15907	1.09073		515.973	-1	2.36065	0.696736	0.967282	1.51269	0.0861923
516.524	-1	0.456974	0.314612	-0.0445334	0.367464	1.28513		516.547	1	0.946781	0.84783	2.96338	1.21397	0.132325		516.685	1	0.938876	1.48035	0.732044	0.990483	0.436871		516.539	-1	0.161858	0.372522	NaN	1.15821	1.06039		516.473	-1	2.15892	0.703836	0.972884	1.50836	0.0818675
517.024	-1	0.432861	0.345163	-0.0186018	0.270939	1.38472		517.047	1	0.928371	0.809081	3.0048	1.21002	0.133494		517.185	1	0.918179	1.47837	0.76515	0.991439	0.445647		517.039	-1	0.179507	0.353661	NaN	1.15632	1.03378		516.973	-1	1.9679	0.718066	0.984726	1.46515	0.0722324
517.524	-1	0.422292	0.359464	-0.000483402	0.187763	1.40128		517.547	1	0.906397	0.76983	3.03369	1.20585	0.135762		517.685	1	0.875141	1.4692	0.776655	0.99085	0.447541		517.539	-1	0.199273	0.343514	NaN	1.14899	1.01696		517.473	-1	1.78606	0.738411	1.00192	1.38859	0.0580445
518.024	-1	0.421198	0.362399	0.0121696	0.113925	1.35976		518.047	1	0.829825	0.727843	2.92781	1.21786	0.135869		518.185	1	0.827258	1.45941	0.782604	0.990395	0.447716		518.039	-1	0.204839	0.407655	NaN	1.15462	1.02008		517.973	-1	1.72058	0.763277	0.965446	1.31069	0.0864411
518.524	-1	0.474155	0.382789	0.0329065	0.0330616	1.3263		518.547	1	0.751755	0.686715	2.82199	1.23188	0.136275		518.685	1	0.763687	1.45707	0.761752	0.995099	0.44002		518.539	-1	0.200363	0.524322	NaN	1.16941	1.0373		518.473	-1	1.68337	0.787517	0.919874	1.23123	0.123142
519.024	-1	0.54682	0.404512	0.053741	-0.0324443	1.29514		519.047	1	0.665832	0.655192	2.73697	1.2651	0.140209		519.185	1	0.717927	1.45415	0.744673	0.997181	0.432137		519.039	-1	0.198971	0.672472	NaN	1.1696	1.06208		518.973	-1	1.74757	0.797636	0.868808	1.13755	0.175532
519.524	-1	0.676587	0.403717	0.0599131	0.0405044	1.26732		519.547	1	0.579556	0.62294	2.65517	1.29884	0.142609		519.685	1	0.722965	1.44959	0.738358	0.99178	0.423719		519.539	0	0.195369	0.822971	NaN	1.16342	1.08466		519.473	-1	1.81863	0.80213	0.818129	1.04297	0.233582
520.024	-1	0.800247	0.401827	0.0810935	0.10288	1.2354		520.047	1	0.491314	0.586622	2.59128	1.33553	0.136464		520.185	1	0.729475	1.44981	0.740371	0.990299	0.413789		520.039	0	0.181695	0.96696	NaN	1.13985	1.09504		519.973	-1	1.91749	0.783865	0.769009	0.944816	0.314532
520.524	-1	0.915104	0.398356	0.123907	0.150017	1.19756		520.547	1	0.408663	0.564049	2.53175	1.37281	0.127833		520.685	1	0.737684	1.45552	0.75198	0.993334	0.402118		520.539	1	0.17683	1.01858	NaN	1.10726	1.09588		520.473	-1	2.01706	0.764517	0.721227	0.846836	0.402651
521.024	-1	1.02571	0.384291	0.177176	0.189339	1.10824		521.047	1	0.354349	0.611138	2.4943	1.41314	0.106606		521.185	1	0.742886	1.45584	0.767392	0.994592	0.399469		521.039	1	0.183841	0.945653	NaN	1.06252	1.08388		520.973	-1	2.12555	0.731651	0.690122	0.751085	0.580225
521.524	-1	1.11503	0.366736	0.232168	0.214257	1.00255		521.547	1	0.305152	0.656548	2.45808	1.45181	0.0880717		521.685	1	0.745951	1.45234	0.785505	0.994589	0.403225		521.539	1	0.187956	0.838567	NaN	1.02737	1.07712		521.473	0	2.19997	0.702635	0.664188	0.666214	0.755862
522.024	-1	1.12946	0.350939	0.278882	0.195472	0.90764		522.047	1	0.265643	0.698783	2.42416	1.48736	0.0746384		522.185	1	0.755073	1.44623	0.749793	1.00264	0.424612		522.039	1	0.193553	0.726451	NaN	0.999062	1.07204		521.973	0	2.1926	0.682865	0.650673	0.607474	0.926846
522.524	-1	1.14699	0.346624	0.322536	0.181327	0.824787		522.547	1	0.228432	0.745098	2.38367	1.52543	0.0624108		522.685	1	0.765538	1.43982	0.699594	1.01296	0.450945		522.539	1	0.206018	0.608607	NaN	0.993284	1.07137		522.473	1	2.15511	0.669888	0.637075	0.550138	1.08713
523.024	-1	1.16728	0.35259	0.36345	0.171336	0.752731		523.047	1	0.192997	0.794564	2.33812	1.56542	0.0511145		523.185	0	0.737399	1.48412	0.66859	1.03171	0.496525		523.039	1	0.221112	0.541871	NaN	0.986616	1.06778		522.973	1	2.0893	0.663298	0.623397	0.494121	1.23735
523.524	-1	1.18243	0.424124	0.42783	0.166217	0.747321		523.547	1	0.158805	0.775298	2.28766	1.59253	0.0515438		523.685	0	0.717891	1.52377	0.639058	1.03209	0.529458		523.539	1	0.238564	0.52097	NaN	0.979149	1.0616		523.473	1	2.03481	0.653273	0.605274	0.442338	1.32793
524.024	-1	1.19585	0.517654	0.500082	0.162731	0.764268		524.047	1	0.124984	0.737537	2.23591	1.61599	0.0551829		524.185	-1	0.72453	1.54933	0.613989	0.976823	0.524078		524.039	1	0.255338	0.492438	NaN	0.987135	1.04728		523.973	1	1.98399	0.642138	0.585713	0.391923	1.39925
524.524	-1	1.1947	0.628625	0.558279	0.347611	0.820166		524.547	1	0.0962089	0.727664	2.19147	1.61896	0.0628133		524.685	-1	0.705644	1.57652	0.612676	0.933942	0.508808		524.539	1	0.271261	0.463425	NaN	1.00357	1.02788		524.473	1	1.90778	0.627113	0.563394	0.36532	1.45842
525.024	-1	1.18268	0.738404	0.616955	0.537035	0.875649		525.047	1	0.0696886	0.715925	2.14487	1.62405	0.0696811		525.185	-1	0.64508	1.60639	0.650154	0.911282	0.477384		525.039	1	0.267379	0.587959	NaN	1.0183	0.98356		524.973	1	1.82581	0.611277	0.540826	0.342833	1.51667
525.524	-1	1.1302	0.842936	0.678046	0.73556	0.9279		525.547	1	0.0509161	0.697775	2.09089	1.63644	0.073928		525.685	-1	0.599123	1.6122	0.671618	0.85018	0.454107		525.539	1	0.262435	0.707841	NaN	1.02937	0.942667		525.473	1	1.71924	0.592884	0.521995	0.321571	1.59455
526.024	-1	1.06691	0.90504	0.712027	0.940312	0.923477		526.047	1	0.0357552	0.682488	2.04827	1.63804	0.0763949		526.185	-1	0.562544	1.60257	0.682801	0.764398	0.436061		526.039	1	0.255307	0.818142	NaN	1.03287	0.908844		525.973	1	1.61698	0.57312	0.506247	0.305417	1.6765
526.524	-1	0.994027	0.929518	0.721968	1.15059	0.868794		526.547	1	0.0254804	0.671075	2.02104	1.62507	0.0764534		526.685	-1	0.499655	1.59979	0.661625	0.783075	0.438727		526.539	1	0.260951	0.922068	NaN	1.02064	0.880284		526.473	1	1.52499	0.550091	0.497843	0.301422	1.76814
527.024	-1	0.913572	0.945422	0.739638	1.16829	0.814259		527.047	1	0.0215474	0.658457	2.02441	1.62275	0.0712121		527.185	-1	0.432369	1.59825	0.633454	0.821487	0.445424		527.039	1	0.274226	1.02219	NaN	0.999024	0.854867		526.973	1	1.44163	0.525591	0.490812	0.288328	1.85862
527.524	-1	0.843059	0.961386	0.758454	1.17916	0.764133		527.547	1	0.0210926	0.645177	2.04456	1.62628	0.0630641		527.685	-1	0.387224	1.59355	0.589494	0.833703	0.45017		527.539	1	0.348447	1.01544	NaN	0.957052	0.838611		527.473	1	1.36703	0.499597	0.485175	0.266004	1.94792
528.024	-1	0.831801	0.980292	0.781493	1.20912	0.73923		528.047	1	0.0212224	0.632628	2.12819	1.62616	0.067508		528.185	-1	0.348269	1.58289	0.546971	0.857122	0.449427		528.039	1	0.456376	0.982706	NaN	0.915041	0.82421		527.973	1	1.31403	0.481152	0.4777	0.250482	2.02608
528.524	-1	0.840589	0.991215	0.806785	1.25661	0.73513		528.547	1	0.021531	0.620302	2.23124	1.62491	0.0758028		528.685	-1	0.327999	1.55422	0.508788	0.914369	0.432114		528.539	1	0.608875	0.984994	NaN	0.896477	0.805537		528.473	1	1.26956	0.465692	0.469499	0.23765	2.09982
[truncated: 170 more rows]
