# Supplementary material for: Corollary discharge promotes a sustained motor state in a neural circuit for navigation
Source: eLife. 2021 Apr 21;10:e68848. doi: 10.7554/eLife.68848 (PMC8139836; doi:10.7554/eLife.68848)
Supplement: Figure 6—source data 1. [file elife-68848-fig6-data1.xlsx]

## Sheet: Fig 6C
WT			RIM ablated
Run direction (radian)	Run duration (s)		Run direction (radian)	Run duration (s)
-1.42814	10.5		1.98064	13.5
-3.07752	9		-0.238031	21
1.46804	10.5		-1.10771	25
0.0276171	22		0.670839	8.5
-3.12409	6		-1.43745	29.5
1.8744	7		-2.31512	5.5
-0.880236	6		-1.34252	5
2.52545	4.5		2.52908	14
1.60429	4.5		1.43506	17.5
0.700267	11.5		-2.9139	4.5
-2.81458	91		-1.09352	4.5
-2.80945	36		1.60522	10
-2.82745	33.5		-2.29122	7.5
-2.88477	15.5		-1.44527	17
-2.27694	46		-1.04142	10.5
3.02849	28.5		1.6472	16
2.82771	11.5		-0.924474	9
2.8975	6		-1.22507	8
0.659392	10.5		0.541499	5
-2.36516	36		2.65082	5
2.46713	20.5		0.121727	8
-2.15051	98		-0.552191	18
-2.99236	8		-2.00676	71.5
2.21292	7.5		-2.99975	62.5
0.907156	5		-1.68413	4.5
-2.35911	22.5		0.253247	13
0.540758	6.5		-1.70882	38
3.03094	38		2.34273	7
2.48057	59		1.4852	33
1.71295	16		1.88955	62
2.4113	80.5		-1.63613	5.5
-2.64009	15		-0.86399	7
-2.88866	24		2.68776	16.5
-1.88922	10		1.97903	8.5
3.06254	27		0.92169	7.5
2.55084	6.5		2.22965	4.5
-0.371548	8		0.463116	6
-2.41639	9		2.97669	7
0.540177	32.5		0.639789	17
2.26179	15		0.766797	5
-2.61518	12.5		-2.3946	7
-3.07484	56.5		1.02194	8.5
3.07183	42		1.74289	6.5
2.10405	21		-1.18015	12.5
2.95836	12		2.07378	9.5
2.7336	41		-1.02517	7
2.45589	35.5		-2.10102	4.5
-2.80023	33		-2.98341	8
2.26021	28.5		-3.1056	9
2.65334	23		1.49554	33
-2.32662	57		3.01304	27
1.80353	37.5		-2.36318	12
2.14391	80.5		-0.742744	5.5
-1.21273	10.5		2.47102	11
-1.80725	84		-1.31633	7
-1.92923	12		-2.72353	33
-1.50366	22		1.15255	12.5
2.63388	15.5		-1.06769	4.5
-1.33405	28		2.99814	4.5
0.625026	60		-0.318369	4.5
2.84501	4.5		-3.0516	6
-1.64951	5.5		-2.85842	40.5
0.177047	5		0.70492	9
-0.168967	16		-3.03188	9.5
-1.55254	5		-2.28755	10.5
0.0772253	32		-2.50777	9.5
-1.71284	10.5		2.45801	5.5
3.01745	15		-0.816918	13.5
0.161812	39		2.1688	12
0.6806	34.5		2.20314	16
-2.18776	35		2.39198	14
-2.72122	34		-2.38463	30
-0.943417	15.5		-2.6007	25
-3.06124	13.5		2.65289	7
2.59112	12.5		-2.85208	6
-1.28025	13.5		-1.98418	24.5
-1.0255	88		-2.12978	50
-1.05793	41.5		-1.72853	15.5
-2.83407	12		-2.0678	17.5
-1.16079	5		1.11818	19.5
-2.37589	40.5		-0.40342	29
1.33773	10		-3.11044	8
0.0393027	22.5		0.565	16
-0.992871	58		-2.12358	7
-1.12203	15		2.54613	16
2.86446	32.5		1.71345	6.5
-1.17853	37		-0.933907	11.5
-2.2906	20		1.72868	4.5
-0.400842	13		2.51759	7.5
-1.85273	31		1.73963	6
0.100625	12.5		-0.828081	6.5
-2.59128	16.5		-1.85253	9
-0.245227	29.5		0.545558	7
1.14757	16		-1.76203	26.5
-0.687449	51.5		2.28664	13
-0.115631	19.5		0.397175	7.5
3.08139	73.5		-0.561826	22
2.554	38.5		2.98813	4.5
2.56308	31.5		-2.95403	9.5
2.6921	29.5		-0.882051	26.5
3.03313	6.5		1.24198	44.5
-2.92683	41.5		-1.95101	14.5
3.03433	5.5		-1.40146	9
-3.13938	16		2.11622	9
3.13492	28		0.154568	11
2.93476	58.5		-2.63219	13
2.60206	19.5		3.12708	22.5
-2.19986	34.5		3.00442	29.5
1.45043	16		1.27943	16.5
2.60804	100		-2.74629	22.5
1.25705	6.5		0.987961	23.5
-2.33622	22		-0.374901	7
2.52665	92		0.0288827	5.5
-2.43704	17		2.98089	4.5
2.8505	21.5		-2.13121	11
-2.7402	4.5		1.5025	33
0.773715	12.5		2.53934	12.5
0.771592	21		3.06305	5.5
0.288757	16.5		-0.585047	18.5
0.449003	13.5		1.51462	6
1.3353	22		-1.47377	7
2.13285	40		1.08248	6.5
-0.634009	8		-0.172018	11
-1.46117	6		-2.14684	14
2.75587	6		2.46983	13
-0.534685	36.5		1.07251	6
-1.92624	18		0.379858	16.5
2.02019	4.5		-0.467139	20.5
-2.55267	14.5		-0.379054	11.5
-2.39276	17.5		1.43345	7.5
0.658883	36.5		0.490605	12
-2.02217	84.5		1.70259	8.5
-2.99738	41.5		2.89863	7
-2.96061	25.5		2.76987	10.5
-2.87711	58		2.58986	8
-1.94341	7.5		-2.64196	13
2.73806	23.5		-1.1425	11
2.75543	30		-1.88122	14
0.600422	11		-0.389942	37
2.74605	62		-0.471113	11.5
-1.96062	24		0.255337	6
2.04175	25.5		2.97261	7.5
1.40413	51		-0.955413	5.5
-1.42701	5		-1.33561	12
-3.03029	26.5		-2.38842	42
-2.16149	19		-2.81319	14
-1.70637	47		1.2036	15.5
1.60684	20		3.05572	51.5
-2.21916	4.5		3.12784	7
1.71887	7		-1.27853	19.5
-0.40982	25.5		0.0715865	13.5
1.63557	29.5		-0.381347	31.5
-0.887536	13		2.94723	13.5
-1.30704	35		1.56843	13
-0.15272	8		1.73306	14.5
1.00886	20.5		-1.64811	18
3.11464	20		-2.15499	5
-3.09594	29.5		-0.841256	10.5
-2.64584	85.5		2.65265	5
-2.71877	114		2.7693	9
-1.40685	28.5		2.48833	8
-1.83819	11.5		-2.53384	12.5
-2.66497	146.5		2.85691	29.5
1.92317	13.5		-0.396457	4.5
2.36507	12		2.85048	22
-2.18789	155.5		-2.36403	8
2.31799	15		-2.38703	32
-0.587719	11		-2.97453	9.5
2.97981	8.5		0.484179	54.5
1.44291	13.5		1.64655	14.5
-1.31269	28		-1.95299	4.5
-1.83445	11		-0.0940139	65.5
1.20669	8.5		-0.875861	6
1.79949	9.5		-2.87913	34.5
2.94952	12		0.260578	14
-2.0448	49.5		-0.367262	5
1.6806	9		2.53104	10.5
-3.07757	8		-1.3829	10.5
-2.96671	70		2.76462	4.5
-2.82773	25		-0.0949571	23
-2.48529	37		0.848975	8.5
-2.68023	10		0.81522	5.5
-2.55118	16		-1.67204	9
-2.41867	54.5		-1.74911	13
-3.09198	33		-2.29025	6.5
2.6997	7.5		2.56268	11.5
0.698467	4.5		-0.129805	10.5
-2.91007	44		-2.9654	7
3.02111	31.5		-1.33196	10
2.38952	9		-0.317756	19
-2.40485	15		2.64019	4.5
-2.82546	44.5		0.467196	10
-1.70118	34		2.6525	4.5
2.48866	13.5		1.97802	27.5
-1.36059	61.5		1.72853	11.5
1.22363	35		2.56547	10.5
-1.43502	39		-1.38571	15
1.84997	42		-2.55996	15.5
-0.838764	28		2.96049	67
2.18953	12		0.621995	6
-0.332861	66.5		-1.01158	7
-2.8561	8		-2.62872	59
-0.00989815	15		2.10459	45.5
2.56654	22.5		0.424956	10
-1.91399	5.5		2.10605	42.5
-1.18109	6.5		0.168978	37
-2.54005	10		0.698713	5.5
2.58752	25.5		1.56796	14
2.3721	27		-0.6988	13.5
-0.742624	9		2.11086	53
-0.961581	11		-1.82849	7
2.93638	11.5		-0.08467	7.5
-1.94213	13		-1.84355	21
-2.00931	16.5		-0.624261	8.5
-0.451639	46		-2.02048	17.5
-2.5614	20		3.0121	22.5
-0.262724	51		0.754618	5.5
-1.78216	26		-0.605367	5
-2.85792	23		-2.05042	11
1.95832	13.5		-0.542822	23.5
-2.59369	62.5		1.43992	5.5
-1.88661	5		-2.65058	5.5
-2.77753	18		-2.61225	61
0.412464	12		0.0243996	19
-3.05826	31		1.53311	29
-2.24758	15		-0.658873	7.5
-2.47562	102		-2.68236	21
0.393557	17.5		0.606452	47.5
-2.26041	33.5		0.614475	13
-2.1119	70		-2.46127	4.5
2.10589	10.5		-1.63248	19
-1.89286	64.5		0.0108594	27.5
1.97978	29.5		-0.923626	12.5
-2.02041	36.5		0.391595	23.5
-1.37205	5		-1.38688	18.5
1.39401	27		-0.822465	19.5
0.951294	13		2.27041	4.5
2.95707	19		2.24532	21
2.00602	34.5		-1.54025	7.5
-2.17409	23.5		-2.80741	7.5
3.08173	22.5		-2.4824	5
3.05751	50.5		-0.0684363	77
-3.06775	16		-2.4569	36
-2.75454	31.5		-0.131642	14.5
-2.78779	9		-2.06167	5
-2.87593	42.5		2.02791	5
-2.61808	34		-2.54009	25
-2.72773	12		-0.0491816	8
2.27081	17		2.02723	14.5
1.77383	10.5		1.80404	18.5
-3.04518	42		1.33382	38
2.38265	11.5		-0.761706	14
-2.52742	7		2.95287	52.5
2.87814	92		2.09824	21.5
-2.75734	9		2.20196	19.5
-0.0909134	10		-1.15064	13
-1.97274	9.5		2.57865	16.5
-1.61325	5.5		-3.08992	31.5
-2.65668	8.5		2.99341	7.5
0.960215	19		-2.20761	24
2.22996	95.5		2.68585	25
2.59518	38		2.28754	6
0.234056	7		2.61357	11
2.68895	7.5		1.98875	5.5
0.0916338	64		3.1139	16.5
2.825	6		-1.7524	8
0.473031	15		-0.259528	6
0.263522	14		0.511416	7
-0.568379	8		2.75233	11.5
-0.291386	17		-2.12636	7.5
-1.364	12		-2.9231	40.5
0.0132006	23		2.3169	26
-0.550051	5.5		2.03701	13.5
1.21535	6		2.06211	17
0.481369	15		-1.3586	9.5
3.11843	57		1.00321	6
-2.98599	13		0.331119	4.5
2.75506	50.5		2.11004	7
3.005	28.5		1.1483	11.5
-1.78327	11		-2.54732	8.5
2.42866	29.5		0.52544	28
-2.31498	11		2.06845	11.5
2.57429	12.5		-0.225294	22.5
-2.58954	9.5		-1.42204	16
-3.05019	12.5		-2.91899	6
2.90463	5.5		0.158901	14
1.95656	51		-2.67585	12.5
-1.24103	13.5		1.45541	26
2.26624	8		0.500899	12
-2.98002	54.5		1.03549	4.5
1.62033	18		2.91717	11.5
2.97832	7.5		-2.15249	14
-1.88834	11.5		-0.110804	6.5
2.55133	6.5		2.29496	10.5
1.40181	40		-1.21203	19.5
2.70647	29.5		1.30013	18.5
-2.74225	24.5		-1.30184	19
2.1073	10.5		1.49574	53.5
-0.303749	25.5		-2.27711	10.5
0.133862	9.5		-0.155326	16
2.97853	30		-3.07814	13
3.11226	15		1.79804	15
-2.87838	5		-2.20619	6.5
0.708605	31.5		1.07438	11.5
-2.96755	32.5		0.626709	12.5
0.262063	5.5		2.78146	8.5
-2.35247	4.5		-2.30519	20
-1.93349	7		2.9513	4.5
0.809162	5.5		1.82192	4.5
1.7392	6.5		1.22955	8
2.31596	22.5		2.74922	4.5
1.54455	11		2.46135	5.5
-1.74905	14		-1.22402	5
2.85608	10		-0.939276	5
0.237003	9		-1.24202	5
2.99318	11.5		-1.98951	6
-3.1065	6.5		2.89733	27
1.4081	15		1.61689	6.5
-2.34505	14		0.634135	24.5
0.967133	6		1.13825	8
-1.86468	47.5		-2.34151	9.5
-2.77194	7.5		2.95669	5.5
1.73727	127.5		-2.88705	29
-1.08572	19.5		2.83744	20.5
1.70335	15		-0.387497	24
0.504708	15		3.06989	9
-0.756747	4.5		1.11677	9.5
-2.76996	6.5		-2.87783	13
-1.81177	10		2.92111	25.5
0.0454927	21.5		2.69787	12.5
-1.50595	32.5		-3.04277	11
2.38293	4.5		-1.99677	26.5
1.09082	11		0.259106	6.5
-2.35232	26.5		0.381187	15.5
-0.118679	27		-0.437532	43.5
-1.02133	6.5		-2.39666	59
-2.46241	96.5		-2.37234	18.5
1.68008	10.5		-2.80834	43
-3.01935	24.5		2.7844	19.5
-2.53484	52.5		-2.99226	88
-2.82623	8.5		3.05882	13.5
2.90239	40		0.463084	6
-2.63562	27		1.04661	13.5
2.73204	5.5		2.00364	10.5
1.39335	8.5		0.113262	10
3.08367	5.5		-3.00493	19.5
-2.87806	4.5		0.163974	58.5
-0.0271013	6		2.86015	4
2.21158	24		2.76803	13
2.21785	53		0.873981	8.5
-2.50178	45.5		-1.64646	21
-0.736702	9		2.461	14
-2.87061	8		0.751813	25
1.99023	29.5		-2.3318	10.5
-2.77358	30		2.52687	5
-1.32773	11		1.35816	9.5
1.79844	84.5		0.480904	8
2.85261	7		-1.92319	10
-1.03812	6.5		-3.11815	11
0.0217282	8		-0.350873	5
2.34509	7		-2.93068	10
-1.94637	4.5		-3.04988	22
-3.02815	11.5		-2.06584	5.5
-0.147373	9.5		0.791314	34.5
2.42076	5		-1.11699	8
-1.34524	16		-0.323699	4.5
-2.68022	4.5		2.50096	6.5
1.29559	5.5		2.53013	8
-0.689754	74		-0.782117	16.5
-2.10948	22		2.498	22
0.647586	16.5		-2.58874	6.5
-2.10847	56		-2.694	35.5
2.46983	12.5		-2.15363	10
-0.700639	31		-2.64333	36
-0.0365385	23		2.66391	21.5
-1.20832	14		-1.83726	9.5
0.993577	5.5		-0.318334	13.5
-2.07728	6.5		1.06253	7
-3.03202	8.5		0.98031	27.5
1.03144	6		0.516848	4.5
-1.81101	60.5		-2.47733	16.5
1.2986	8.5		1.7556	7
-2.63775	38.5		0.405084	12
-0.149679	10		-0.039052	5
2.6966	20.5		2.27021	17.5
-3.13173	25.5		-0.407431	106.5
0.331854	35.5		1.13991	48
-2.65663	13.5		2.2683	20
-0.86525	14		0.194189	15.5
2.62679	15		-0.709793	15.5
2.6571	20.5		-1.24633	24
1.97772	4.5		0.554563	4.5
-0.188697	55		2.85825	13
0.190782	12.5		-0.355122	8
1.64284	24.5		2.97127	16.5
-0.754281	13.5		-2.64423	6.5
3.08878	11		2.30523	12
-0.631236	6		2.33813	5
1.41168	11		-1.5375	7.5
-0.423069	10.5		-1.9985	10
1.83916	15		-2.85096	6.5
-2.75001	52		2.08847	13.5
-1.47298	12.5		-2.79661	5
-0.962978	14		-3.01762	6.5
-0.97628	39		2.79554	9
-1.81531	6		-2.63394	34.5
-2.00455	7.5		-2.06318	30.5
0.499711	9.5		-2.32937	70
-1.43773	6.5		-2.16232	73.5
-0.858253	17.5		-2.51912	40.5
-1.79935	40.5		-2.06592	22
-2.39172	11.5		2.76393	50.5
2.2902	7.5		-1.75821	84
-0.797723	12		-1.97742	92.5
-2.55775	15		-1.82405	4.5
-1.01194	6.5		2.22496	11.5
0.657768	4.5		-3.05603	38
-1.66163	11		-2.66347	6.5
-1.45771	5.5		2.8226	21.5
0.205214	5.5		2.39485	12
0.900409	35		-1.94657	7.5
-0.983815	46.5		-2.72657	9.5
-0.604256	50		2.90453	13.5
1.00847	67		2.4211	36.5
1.51097	26.5		0.162366	13.5
1.45486	11		-2.43308	5
2.58138	17.5		-2.52549	7
1.52543	38		-2.14156	72.5
3.10545	9		-0.182469	7.5
1.39011	11.5		1.30657	12.5
-2.14645	20.5		-2.88967	5
1.5441	34.5		2.14995	5.5
-1.13784	6.5		-0.387696	57
-2.22935	5		-2.08302	8.5
-2.03548	25.5		-2.63388	12.5
-1.77654	32		-1.12236	5.5
-0.306245	5		-2.76804	11
-0.025538	23.5		-2.11352	116.5
-2.10269	21		1.49066	20
-1.65624	17		0.577966	8.5
-0.978616	8.5		-1.00499	11
2.25794	6.5		-2.3434	5.5
-0.258313	7		0.0848279	11.5
1.05966	13		0.580795	9
2.42155	10		2.24316	7.5
-1.48959	21.5		-0.610539	10
-2.17946	10.5		-0.683831	7.5
-0.9452	12		2.63277	29
-1.1965	6		-2.13752	6
1.66592	12.5		-2.83907	12
-2.04674	63.5		-2.80765	10.5
3.07666	7.5		2.92906	7.5
2.96675	38.5		-2.61045	31.5
2.92944	37.5		-1.70377	7
2.60427	42.5		-2.02147	6.5
-2.3229	21		-0.674547	15.5
0.104449	6.5		-1.92598	14.5
2.40159	8.5		3.04885	9
-0.400077	18		-0.2877	11.5
-0.272757	6.5		0.750973	11.5
-1.99428	21.5		2.21983	39
1.88681	15.5		3.08051	13
2.63465	10		-2.77726	54
2.94004	101		-2.03819	56.5
2.62605	13		-1.57164	7
2.62491	17.5		-2.53347	6.5
-2.99827	48		-2.67743	13
3.09383	66		1.9323	7
-2.8828	34		2.58742	32.5
-1.1721	5		-1.79693	12.5
2.19305	38		-0.978654	20
-2.7257	12		-2.78082	43
-1.66505	9.5		-2.1452	6
-2.83707	13.5		3.08357	4.5
0.0340109	5		2.72409	8.5
2.42285	12.5		-2.00981	27
-0.480694	14		-2.27591	25.5
-1.47864	10		-3.08481	25.5
0.44902	24.5		-2.49551	65.5
-2.65988	10.5		-2.72975	11.5
0.0255413	18.5		2.99953	6
2.15629	8.5		2.64384	9
-0.721425	23.5		-0.624686	5.5
-0.392532	21.5		0.746662	9
2.48982	22		1.19653	101.5
2.63749	40.5		2.85662	14
2.64421	24.5		-0.175589	5.5
0.934442	8.5		2.22363	13
2.61758	29		1.36234	37.5
2.49407	13		-2.47801	6
0.444883	21		2.10755	11.5
-2.41361	16.5		0.584244	6
2.79015	32		1.6463	9
2.67991	8		-2.20629	8.5
2.54182	12		-2.71138	12
2.98943	13		-1.44539	7.5
-1.98427	10.5		2.99885	11
2.48045	28.5		0.726758	6
-1.24617	10.5		-2.60146	7.5
-2.0714	9		-0.698847	6
-0.563381	34		2.15569	4.5
0.842272	11		0.184365	4.5
-1.48293	18.5		0.799278	11.5
2.29178	9		0.0754016	23.5
-1.3464	5		1.05811	12
1.10794	20		-1.34976	5.5
2.03799	27		-1.64556	12
1.99717	18.5		-1.56972	9
-0.249959	17		1.257	6.5
-0.542647	6		1.93315	4.5
3.07908	11.5		0.432096	5.5
1.79322	51		-1.63997	35
2.34372	19		-1.44045	5
-2.96812	5.5		1.3126	14
0.54993	96		-1.4075	10
-1.45664	5.5		1.75802	9.5
-1.20115	24		-1.05986	8
1.92676	53		-2.58551	9
-0.387512	5.5		-1.27447	5
-2.05916	6.5		2.62006	14
-0.728656	14.5		2.01919	17.5
1.18287	12		-2.13938	8
1.4742	7.5		1.97217	7
3.02121	88.5		-0.641893	15.5
-2.81822	48.5		-2.89368	8
-2.8738	20.5		2.42406	9.5
-2.49486	11		2.09133	6.5
2.46532	38		0.525627	5.5
2.52788	43		0.0450308	17.5
-2.71905	45		-2.10146	4.5
-2.98407	25.5		1.59388	4.5
-3.01212	32		0.263869	11
-2.87939	27		-1.61914	16.5
2.23815	33.5		2.97538	8.5
-2.24229	6.5		2.82133	12.5
-2.77724	15		1.14521	22.5
2.43086	77.5		-1.91374	4.5
-2.19077	85		-1.30659	18.5
-1.72313	15		2.02474	9
0.769159	5		0.174858	28.5
-2.93274	18		1.06018	39.5
-2.55176	38		-1.05944	8
2.85675	26.5		2.45973	7
1.39561	4.5		-0.925779	4.5
-3.08181	9.5		-2.24347	5
-2.4017	18.5		0.534478	5.5
1.78482	12		1.29046	48
2.74629	6		2.90857	5
-2.74768	22.5		1.96165	11
-2.98293	15		-0.572133	40.5
2.25178	13		1.31696	4.5
2.68911	24.5		-2.67354	10.5
3.12851	30		-0.883751	12
2.53328	27		2.68565	9.5
2.19567	9		0.505976	12.5
-3.02482	62.5		-2.3889	14
2.54206	15		-1.56169	6.5
-2.69155	19		1.14319	5
2.02966	20		2.35241	12.5
2.41561	32.5		-1.59201	8
2.23788	44		-1.47699	5.5
2.85266	44.5		-1.00152	23
2.53191	9		-1.76045	9
1.69041	33.5		1.97479	4.5
2.21909	73		-2.08564	4.5
0.772308	5.5		-1.78866	23.5
-2.27242	20		-3.0477	5.5
2.51652	18.5		-0.789996	17
0.737441	18.5		-0.384143	10
-1.88594	16.5		-0.02416	4.5
-2.97214	70.5		-0.327327	6
-2.85072	45.5		0.390204	13
3.01577	43.5		-1.90566	7.5
2.82906	11.5		-3.0347	12.5
2.8283	16.5		-2.39774	9.5
-3.12651	6		2.76276	5
2.94584	25.5		1.25167	5
3.13751	31.5		0.301403	20.5
2.76311	34		1.76899	10
-2.95703	16.5		-0.270197	31.5
2.74922	47.5		0.961235	6.5
1.10169	8		1.52861	29.5
-2.06674	38.5		-3.03842	19.5
-1.69276	140		2.45808	48
1.79196	8		0.984589	16
-1.74441	55		0.932025	7
-1.6876	14		-2.45194	31.5
2.17597	8		0.242594	43
1.38709	19.5		1.32557	7
1.54936	13		-2.15034	14.5
-2.31327	27.5		1.17343	14.5
-1.39547	67.5		-2.83019	5
-2.54133	8		2.92294	10
1.03166	18		2.99811	6.5
1.80771	15.5		-0.53093	20.5
0.91517	8		1.23186	12
-3.04809	45		-2.76406	25
-1.54691	8.5		-0.702328	5
2.72599	63		0.256538	6.5
2.50577	12.5		-2.66167	5.5
2.4757	48.5		0.0320736	16
2.57122	25.5		-2.90089	9.5
2.94486	57		-2.11024	20.5
-3.02489	18		-1.35476	19
-3.05693	36		-0.564928	7.5
-2.10879	8.5		-1.35994	6.5
-3.02261	17.5		-0.470893	5
2.68669	26.5		-2.06298	6.5
1.45167	18		1.21634	10.5
2.54699	44		-1.068	6.5
2.67831	36		2.45113	8
2.26382	39		-2.23763	5.5
-2.36413	10		-0.217946	10
2.97436	18.5		-0.676336	13.5
2.29039	12.5		1.32834	12.5
2.67675	19		-1.44679	23
-2.9148	16.5		2.94909	4.5
-2.58112	51.5		-1.02981	4.5
-2.37965	24		-2.91238	4.5
-2.57939	24		1.59272	8.5
2.29811	54		-2.23158	7
2.59129	6		2.79185	6.5
1.894	27.5		-1.39748	11
2.84607	11.5		-0.472499	5.5
0.466373	20		-1.85303	12
2.18919	8.5		-1.91389	10.5
0.648657	9.5		-0.053355	7.5
0.466333	45		0.551134	6
-0.278784	14.5		-1.16432	7
-2.36691	69		-3.01951	5.5
-2.96146	11		-0.96078	10.5
-3.12139	35.5		0.426597	15
2.30189	40		-2.01854	7
-2.32026	23		-1.59718	11
-2.5211	12.5		-0.532697	15.5
2.34959	36.5		0.160284	9
-3.05182	51		0.147351	11.5
1.94524	23.5		0.621765	17
1.45956	22.5		-0.184716	33.5
1.95892	35		2.73173	11
3.06893	6.5		-0.704029	28.5
1.01918	6.5		-1.20725	11.5
-2.1765	33.5		2.68152	19
2.67999	17		-1.19943	9.5
-2.76776	8		1.39957	13.5
-0.0744636	6.5		-1.48692	11
2.25548	104		2.8591	66
-2.9336	35		-0.106275	9.5
0.892973	11		-1.03322	54.5
-1.03706	5		2.99405	21
2.00097	48.5		0.31297	13.5
2.2829	43		-0.166733	19.5
-1.32473	6		-2.33625	13.5
1.90246	6.5		-1.13967	7
-2.9696	8		-2.78629	45
-0.124929	6.5		-1.68369	31.5
2.9519	48		2.61832	17
-0.31459	7.5		-2.13964	19
2.56149	13		-1.38286	47
3.02409	42.5		2.81129	8
2.74471	28		-2.57208	29.5
2.79525	80.5		-0.343024	6
3.09165	24		-2.20138	7
2.8405	23		-0.58115	10
-2.12432	5.5		-0.890105	8.5
2.97332	51.5		2.42006	7.5
2.25798	6		-2.81203	6
-1.69977	8		0.42256	8
-2.80555	30		-2.75803	6
2.65146	29		0.965889	14
2.78035	17.5		1.39743	8
-1.6202	11		-2.55943	19.5
2.25183	84		-1.36641	9
1.75894	17.5		1.92062	8
-2.64938	5		-1.22466	12
-0.364685	8		2.8506	19
-3.02201	26.5		-0.98039	5.5
-0.632399	6		-0.294485	10
2.5415	25.5		-2.56894	16.5
-2.39705	23		2.59015	35
3.1407	13		0.716005	13
-2.43283	30		3.00309	17
-2.33503	62		2.47112	20.5
-2.96246	18.5		-0.966505	8.5
2.83369	21.5		-2.93748	13
-2.49974	14		2.62134	30
3.06138	21		-2.51385	10
-2.96572	76		-0.381541	21.5
-2.92231	59		-0.112052	14.5
-2.32751	26.5		0.920794	20
-2.96324	76		0.26021	18
-3.13767	26.5		1.80094	18
3.06439	71.5		0.352372	43
2.50264	25		-2.26737	14
-2.8155	30.5		-2.38564	7.5
1.74896	25		-2.44535	25
-2.18254	85		-2.82415	6.5
1.65081	35		-0.589603	21
0.895664	66.5		-1.24579	9.5
-1.49833	8		-1.92432	6
2.16773	125.5		-1.51752	8.5
2.89763	12		-1.79916	16
2.61049	44.5		2.05092	22
2.2643	65		2.91797	28.5
1.95377	27.5		1.19837	13
2.15719	40		2.22035	11
0.814813	6		0.968289	11
0.644429	30		1.85228	15.5
0.692919	6.5		-2.05595	16
-1.50377	10		-1.86751	24.5
-1.6085	33		1.05384	10.5
0.537297	4.5		-0.186597	14
2.98147	12.5		-0.387271	14.5
-0.387571	10.5		0.35637	4.5
0.436787	18		-2.65582	17.5
-0.0688896	12		-1.27692	21.5
1.45463	13.5		1.96918	11
-0.379648	92		2.62925	10
-1.22428	11		2.22795	16.5
-0.42354	6		2.4536	4.5
-1.44293	18.5		-3.07651	5.5
-0.816212	14		2.49255	11
-2.24663	20		2.54969	5.5
1.30815	6		2.51717	11
2.98691	26		-2.68945	5
-1.25568	6		-0.637544	13
2.54516	34		-1.63167	9.5
2.55001	23		2.74488	10
2.92352	58.5		0.165148	13.5
-1.23583	14		0.904683	13
2.03137	9		-1.84994	15.5
-2.33941	19		1.48368	4.5
-1.64718	12.5		-0.568656	10.5
-2.75	21.5		0.956933	7
0.993026	5		-0.32611	6.5
2.64294	10		-1.07421	13.5
-0.79776	7.5		-0.00194479	7.5
-0.961462	5.5		1.19223	6
0.181055	21.5		2.3632	6.5
1.26209	7		-1.25368	52.5
2.69105	11.5		1.64148	5
3.14084	27.5		-0.607815	10
-3.00199	13		2.16444	5.5
2.89916	18		-0.223873	10
-3.05375	24		1.59005	9.5
2.4695	5.5		-1.53092	25
2.22812	7		2.81142	16
0.433028	11.5		1.71502	14
-3.09632	13.5		2.66246	5.5
2.19208	11.5		-1.023	20.5
-2.71226	47		0.130896	14
2.31127	9.5		-1.32804	13.5
2.7683	10.5		-2.84629	9
-3.08305	9.5		0.657347	6.5
-2.78553	33		2.58958	8
2.18042	26		-0.732714	6
-2.89706	30.5		2.12698	5.5
-2.80723	21		0.275523	13
3.0998	10.5		0.395405	7.5
-1.89569	6.5		-3.07036	14
2.87878	13		2.68731	9
2.62431	33		1.38132	29.5
2.74773	25		-1.83392	15.5
-2.74152	16.5		-0.88332	5.5
2.62641	25.5		-1.44515	6.5
2.2402	33		1.22619	4.5
1.66954	20.5		-0.622726	7
-1.28512	23		-0.575219	18.5
1.71052	32		0.949579	9
-2.46297	6		0.12324	11.5
-3.13565	26.5		1.43825	4.5
-1.75032	8.5		1.9818	18.5
0.253064	6		-2.43588	18
2.37389	15.5		-0.57319	21
1.36628	12.5		0.536758	26.5
-0.0947203	9		-0.487404	40.5
0.905766	9.5		1.51635	16.5
-1.29744	19.5		-1.60455	18
2.51499	17		0.00580584	7.5
0.878963	11.5		2.98179	17
0.326538	7		-3.02562	64.5
-2.56266	83.5		-1.81697	24
-2.51804	25		-1.89016	15.5
-3.03138	7		-0.169871	5.5
-3.10022	19		0.740621	25
-2.64491	8.5		2.60812	6.5
-2.84127	12.5		1.11443	11.5
-2.12105	21.5		-1.41979	14.5
2.72745	18.5		-1.75223	9
-0.977549	16		-1.30778	49
-2.70153	14.5		-2.53834	13.5
2.52183	55.5		0.231774	24
2.44561	35		-2.71536	13.5
-1.66107	7.5		-2.7207	21
-2.543	12.5		2.12876	5.5
-2.88612	30		-1.12848	8.5
-2.63332	39		-1.46523	16.5
-1.1572	5.5		-1.84305	7
2.71692	4		-2.05524	23.5
2.23046	35		-1.37778	7.5
-2.7591	64.5		-1.42117	5
-2.20152	24		-2.45726	6.5
-1.47047	73		-1.41073	9.5
2.83185	4.5		-2.63704	15.5
2.91018	59		-2.40729	36
-2.86852	50.5		-1.06134	7
2.98848	29		-2.48601	4.5
3.01543	22.5		0.333376	5.5
2.65569	24		-2.18	6
-1.44932	6		0.0836189	10
-2.98958	10.5		-1.81115	33
-2.05805	39.5		0.747342	21.5
0.11874	5.5		2.50469	13.5
-2.48768	47		1.94401	8
-2.10152	35		0.194973	7
-3.07552	8		-2.22289	4.5
2.02717	62		0.444292	9.5
-2.94404	66		0.494586	11.5
-2.51276	31.5		0.542716	15.5
-2.84472	15.5		0.789955	6.5
-2.0259	46.5		-2.3521	15.5
-2.1745	20		-2.31934	10.5
2.06548	19.5		1.67291	21
-0.570833	9.5		-1.93618	6
-2.6578	65.5		0.127506	10.5
2.88079	39		0.42817	8.5
-2.93736	11.5		2.63834	15
2.8436	32		-0.136286	8.5
2.82711	20.5		0.139081	16.5
-2.72001	24.5		-2.44919	5
2.97193	29.5		-0.56195	13.5
-3.00316	12		1.55576	9
-1.11379	7.5		-2.64416	23
2.71275	23.5		1.32715	10
2.91678	10.5		-2.28583	22
-1.78779	25		-1.39428	7.5
-2.88885	42		1.61001	20.5
2.65689	11.5		2.1645	23.5
-1.79305	7.5		1.83904	9
2.18801	26.5		2.05291	6
3.11618	7		0.618968	13.5
0.352883	7.5		-0.752401	9.5
-2.73969	27		2.70357	20
3.0783	15		-2.80714	8
-3.04686	47		-3.00853	17
2.40881	12.5		2.58021	6.5
-1.46313	18.5		-2.53475	18.5
-0.379736	9.5		0.873785	26
3.09593	6		1.48563	39.5
2.26984	5.5		-1.27389	15
-1.34107	22.5		0.660023	6.5
2.11644	15		-1.1157	11.5
2.23722	32		2.11293	9.5
1.14288	19.5		-0.688528	8.5
-2.52413	19.5		-0.998755	15
1.47158	29.5		2.87704	8
2.3156	13.5		-1.70837	6.5
2.65067	5		0.375554	4.5
2.57723	8		0.656612	19
2.75431	5		1.99032	15.5
-0.825007	27.5		1.68709	16.5
-2.66055	9.5		1.00856	16.5
1.47765	6.5		0.987186	10.5
0.115091	12.5		-1.8314	16
1.99952	7		2.1545	5.5
2.43575	7.5		-1.61778	4.5
1.57707	22		-3.12443	12.5
0.00671663	5.5		-1.85227	21
-1.15031	19		-1.89994	4.5
-2.05972	16		0.327214	10.5
1.67106	6		-0.656552	27.5
-0.596582	5.5		-0.830526	17
2.94852	6		-2.92138	9
-0.197054	32		2.58615	8
-2.22542	17.5		0.781067	36.5
1.5199	9.5		1.99425	7
-0.866398	76		-1.74981	17.5
1.54006	13		1.41324	24.5
3.00603	9		2.01366	13
-0.502345	44.5		0.435351	9.5
0.495391	10.5		-1.02245	7.5
-1.90563	36.5		2.29115	9.5
-1.94372	18		1.34544	12.5
-2.37915	8.5		2.57389	8
0.20081	29		-1.59684	16.5
-1.88083	8		2.36395	10.5
2.53271	11		2.04838	25
-1.0809	15.5		-0.895975	12
1.75116	5		-0.599532	42
-2.33295	4.5		-2.12947	6.5
1.49057	31.5		0.871073	4.5
-2.83561	50.5		0.677291	11
-2.42805	63		-2.64711	7
-2.15654	35.5		2.80945	13
-2.98795	22		1.54455	50
-1.78898	104		-0.599564	24.5
-2.7138	6		-1.14076	64
-1.92956	148		-2.39919	9.5
-1.80543	15		-1.36543	50.5
-2.72757	14.5		-0.361329	73.5
2.46387	27		0.425262	9.5
-3.03408	11.5		3.13892	33.5
-2.84516	37		-2.71848	30.5
-0.746025	4.5		-2.91619	67.5
-1.64742	7		-2.16017	24.5
2.6477	16.5		-2.90439	75.5
2.98133	9.5		-0.287767	49.5
2.70612	34.5		2.03743	37.5
-1.78139	4.5		2.42277	218
-2.37306	24		2.74582	5
3.11406	29		0.576098	4.5
1.70299	7		0.631348	9.5
-2.99442	7		-0.630981	12.5
2.27261	48.5		-2.67139	13
-2.81724	21.5		0.690449	13
0.188684	14		-2.37038	5
-2.1115	104.5		0.554392	25
-0.0090756	8		0.160219	6.5
1.03405	12		-0.108828	8
3.01909	40.5		0.285982	13.5
2.56341	7.5		1.33979	26.5
2.52323	46		0.334859	4.5
-2.78475	5		-0.720492	8
2.58108	13		-2.10794	41.5
2.72855	9		-1.07409	4.5
-2.36533	7.5		1.66463	8.5
2.92162	12.5		2.70824	9.5
-2.66588	12		0.450042	8
-2.47564	7.5		0.619571	18
3.06444	6.5		0.59517	17.5
-0.272125	9		2.38864	30.5
-2.72132	18.5		-2.85226	27
-2.76664	12		-2.50155	15
2.12638	16.5		-2.76945	15
2.49131	22		-2.38696	10
2.20796	59.5		-2.40793	62
2.50126	9.5		-2.51068	26.5
2.05152	6.5		3.0767	15
0.772737	5.5		2.41051	6.5
-2.89884	6.5		-2.78409	10
-2.32247	6		-3.0156	7.5
1.88091	9		2.97823	6.5
1.90303	26		-2.14871	11
3.13045	28		-2.22037	9
-3.12767	20		-1.98338	5
-2.86161	25.5		-1.56316	16.5
-1.89953	12.5		-0.349642	4.5
-2.81193	11		-0.446144	14.5
-2.09237	38		-0.91135	9.5
2.46794	30		-0.865052	8.5
2.21752	19		-0.155265	9
0.238839	5		0.909992	14
2.36818	49.5		1.30706	16
2.92381	12		1.0588	22.5
-2.12905	26.5		1.55265	8
-1.24711	10		2.22413	13
2.15849	60		2.37498	20
-1.86552	14		2.5893	12.5
0.0512275	6.5		2.46444	18
2.81143	11		3.00011	21
-2.91863	8		2.81514	8
1.87296	22		-2.93132	48
-2.60682	8.5		-1.93911	36.5
2.41094	14		-0.719281	32.5
2.9933	10.5		0.816236	23.5
-1.70279	19.5		2.38253	6.5
-2.23771	23		-3.03546	15
-1.91994	6.5		-1.74003	10.5
-2.71895	34.5		-1.08484	12
3.03113	33		-0.152748	19.5
2.68489	94		0.409027	6
2.69865	70		2.26041	46
2.36648	103.5		3.03479	18.5
-2.07187	14.5		-1.63814	8.5
1.98298	7		-1.18745	26
0.700072	12.5		-0.35498	11.5
1.13673	5.5		0.567487	5
2.66495	27.5		-1.26472	9.5
2.39772	24		-2.66111	9
-1.61129	5.5		-2.23916	7
2.73195	51		0.456503	7.5
2.2688	11		-2.01632	13
2.98049	14.5		1.82047	13
2.68019	14		-0.979964	21.5
-3.05628	8		-2.41559	59
2.62701	49		-0.380281	6
2.48745	13		1.55702	6
-1.63246	4.5		-2.62578	48
2.18233	4.5		0.883988	5
-0.536746	14.5		-0.277652	17
-2.48225	36		-2.70435	59.5
3.11765	73		-2.90998	100
-2.8877	17.5		1.82297	5
-1.49552	6.5		3.00526	21.5
2.8436	28		2.33235	5
-2.52832	67		3.053	18.5
-2.16342	17		2.76746	15.5
-0.0449437	5.5		-1.80671	9
2.37139	87		-0.0838754	10
-1.25715	32.5		-2.01984	15.5
-2.11973	49.5		-2.40831	24
2.42868	27		-1.32809	5
-1.34021	17.5		-2.95987	23
1.50129	29		2.48618	37.5
-0.573218	6.5		1.45385	16.5
-1.71757	9.5		2.03035	20.5
1.51277	101		1.6153	15
1.38694	7.5		2.06282	14.5
			2.25832	40.5
			-1.99339	10
			-1.29863	10
			1.79176	6
			0.88413	9.5
			-2.65815	11.5
			-1.94086	16.5
			0.794215	4.5
			2.20827	5
			-1.53208	11
			1.17805	5
			2.16021	4
			-0.103519	18
			-2.9715	8.5
			-2.83741	5
			1.87948	13
			2.96262	84.5
			3.14089	34.5
			-2.70622	20.5
			-2.05319	8.5
			3.1274	9
			-2.30873	14
			2.6679	6.5
			3.09943	14
			-0.996103	12
			2.11705	9.5
			-2.57878	17.5
			2.32445	24
			-2.2669	11.5
			-2.60123	17
			-0.952161	15
			1.38661	54
			-1.1941	26
			-2.34173	20
			0.815294	23.5
			-2.66533	9.5
			-0.880623	22.5
			-2.67227	10
			2.81612	69.5
			-2.09546	6.5
			2.87178	9.5
			2.73704	72
			3.04902	52.5
			2.51076	12.5
			-2.78916	27
			0.926346	13
			-2.98916	8
			-2.7467	16.5
			0.698009	8.5
			1.53262	65.5
			-2.81609	9.5
			2.79397	14.5
			2.05032	33.5
			-1.81562	14
			2.28921	20.5
			3.12899	24
			-2.02325	24
			-1.5716	7
			3.01111	36.5
			-0.974271	17
			-1.93746	4.5
			1.0318	29
			0.637263	208
			1.02853	5
			-2.48375	14.5
			2.32935	7
			-0.503489	5
			-1.16334	12
			-0.770199	4.5
			-2.79391	4.5
			-2.44492	6.5
			-2.70555	8.5
			2.59879	28.5
			3.11113	5.5
			-1.01778	13.5
			-1.39155	15
			-1.27682	7.5
			-2.29708	16
			2.23025	13
			0.0485806	6
			2.80195	14
			-3.02077	50.5
			-0.315593	7
			0.462995	5
			2.71919	35.5
			2.88469	61
			1.98345	7.5
			-2.86021	27.5
			1.49818	5.5
			2.84261	13
			-1.79958	5.5
			0.333569	7
			2.17204	19.5
			-2.33121	4.5
			-3.11639	21
			1.5804	5
			2.89349	11
			2.11309	6.5
			-1.85362	16.5
			-1.58447	9
			-1.63095	12
			-2.76062	21.5
			-1.65243	6.5
			-1.22173	49
			1.5844	71
			-1.70329	14
			-1.68073	13.5
			2.39627	17
			-1.74694	15.5
			-0.456518	7.5
			1.6336	6.5
			2.73171	9
			2.15397	14
			-0.196296	6
			-2.76076	6
			-0.301113	4.5
			-0.549443	10.5
			-0.397298	10
			0.491296	27
			-0.585317	16
			-1.3945	4.5
			1.70814	10
			-1.48007	17
			-2.99133	12
			2.44449	29.5
			-2.42008	8
			-1.96441	13
			-1.94195	17.5
			-2.19213	9.5
			-1.44632	21.5
			-0.461337	14
			-2.2696	11
			-3.02846	9
			-0.196053	9.5
			-2.53204	19.5
			-2.23254	19.5
			-1.30552	11
			-2.20627	9
			2.1508	6
			1.97486	10.5
			2.49999	15
			2.30778	5
			0.404974	68
			-0.417309	10.5
			-0.832676	5
			0.392006	16.5
			-2.74559	6
			-1.64777	14.5
			-0.467861	14.5
			-1.18007	17
			-1.11184	8.5
			-0.6595	20.5
			-3.0179	16.5
			0.99749	17
			-2.70012	19
			2.89656	5
			-1.13462	4.5
			-2.30474	12
			1.76926	4.5
			-2.67939	12.5
			-2.31612	19.5
			-1.43196	18
			-2.53691	13.5
			-1.63717	18.5
			3.13702	17
			2.74343	18.5
			0.560085	53
			0.28846	9.5
			1.61305	11
			1.18684	5
			2.91424	12
			2.44644	21
			2.75484	13.5
			2.39124	15.5
			2.40889	10
			1.21622	11.5
			-1.38421	19.5
			-2.94687	10
			1.94398	10
			-2.86415	5.5
			2.37098	22.5
			2.57051	15.5
			1.89853	20.5
			-0.439765	6.5
			-2.42344	7.5
			1.97463	19
			-3.00468	8.5
			-2.98672	5
			-2.84158	14
			0.94341	7.5
			0.863714	6
			2.42562	6.5
			-1.29006	12.5
			-2.40207	8.5
			-1.96944	8
			-0.621363	7.5
			1.37484	17.5
			-2.40103	17.5
			-2.90427	10.5
			1.97709	13.5
			1.16247	48
			-3.03623	6.5
			3.03733	5.5
			-0.900491	9
			1.63174	118
			-2.95354	26
			-2.68496	10
			-2.78759	8
			-1.21064	15.5
			1.54777	13.5
			2.40023	19.5
			2.50281	7.5
			-2.34893	10
			-1.77425	10
			-0.499122	6.5
			-1.15979	11
			2.46626	26.5
			2.97407	5.5
			3.09051	22
			0.285523	8.5
			2.26295	4.5
			-2.05684	23
			-0.354473	4.5
			-2.6811	27
			-1.42799	10
			2.55473	9.5
			2.66322	4.5
			1.86916	9
			-2.87559	7
			-1.39107	11.5
			-1.79082	17.5
			-2.98802	10.5
			1.94847	19.5
			-1.80879	7.5
			1.12031	10.5
			-3.07585	7
			1.20864	12
			2.72755	6.5
			-0.964956	25.5
			0.162995	25
			2.62832	26
			1.28121	6.5
			0.2427	99
			-1.75373	12.5
			3.04953	46.5
			-0.483492	9
			2.53789	13.5
			-1.03838	7
			-1.44689	20.5
			2.48843	9
			-3.02821	32
			2.1347	35.5
			2.9296	7.5
			-2.28661	10.5
			2.81258	17
			-1.29248	39
			-2.67208	20.5
			-2.12108	35
			1.9377	10
			1.65645	9.5
			-2.79065	26.5
			-0.836727	27.5
			2.43382	37
			0.0786853	13
			-0.277691	68
			-0.663152	32.5
			2.89361	41
			2.56205	35.5
			-2.2076	28.5
			2.70259	13.5
			-1.69714	15
			-1.95637	14
			2.26216	49
			-2.15017	6.5
			-1.56989	24
			-1.50173	6
			-1.50206	11
			-0.289648	24
			-2.30522	22
			-0.814281	8
			0.0574649	123
			1.84913	51
			-3.11266	25.5
			0.348691	6
			2.32756	5.5
			-0.315359	7
			-2.70183	9.5
			-2.13617	7.5
			-2.36636	11
			-2.74793	38
			-1.38868	7.5
			-2.91017	12.5
			-2.21722	18.5
			-2.35531	17.5
			2.59118	20.5
			3.10378	5.5
			-2.83836	11.5
			2.91041	7
			2.48955	15
			2.83093	5
			-0.917443	9.5
			2.05922	20.5
			0.925028	5.5
			2.52272	11
			-0.95392	47.5
			-0.118481	13.5
			-1.57306	98.5
			-2.80704	8
			2.60143	8.5
			-0.974689	15.5
			3.07536	37.5
			-2.40128	24.5
			-0.0494162	12.5
			-0.493239	7.5
			0.447152	4.5
			0.282611	5.5
			-2.68172	5
			2.89804	4.5
			1.78736	4.5
			-0.512316	8.5
			0.201423	11
			-2.04855	7.5
			1.22579	15.5
			2.64857	17.5
			-0.256527	9
			-0.922201	5.5
			-1.43589	5
			-1.52823	14
			0.837333	10
			1.28138	11.5
			-2.00574	8.5
			0.644227	11.5
			-2.89674	34
			-1.8261	6.5
			0.579822	8
			-2.95138	23.5
			-2.55012	20.5
			-2.32192	23
			2.73458	6.5
			-2.80356	21.5
			-2.15845	14
			0.476859	14
			2.57898	9
			-0.335402	13.5
			0.814577	13
			-3.05005	12
			-0.0333665	6
			1.66006	7
			-1.13383	4.5
			2.86915	12.5
			1.30808	6
			2.01538	5
			-2.16043	20
			2.94718	5.5
			-0.540166	11
			-2.69564	4.5
			-2.93498	70
			3.03196	6
			-2.81922	32.5
			1.95104	7.5
			2.58504	7
			1.98654	4.5
			-2.87329	5
			-1.4729	6
			2.47569	8
			-2.64794	12.5
			2.09907	28
			-2.72608	12
			1.25444	5
			1.80033	12
			2.96897	10.5
			-1.06506	12.5
			2.63087	32.5
			-1.04047	14
			-1.82992	43
			2.57595	19.5
			3.00904	6
			-1.94445	14
			-2.34812	27
			0.493904	24
			2.1237	8.5
			2.00455	9.5
			-1.61545	18.5
			-2.186	19.5
			-2.69317	48
			2.26317	10.5
			1.29334	5
			-1.53877	24.5
			-0.812417	14.5
			3.10316	35
			2.24871	49.5
			-2.94044	9
			2.98955	4.5
			-1.70288	11
			2.84572	21
			2.24647	16.5
			-1.98668	17
			1.02295	8
			0.609138	9
			-2.36725	32
			2.14325	13.5
			-1.76859	16
			1.0609	6
			2.59123	22
			-2.07542	4.5
			0.167449	12
			2.79177	10
			1.23704	14.5
			-0.294582	44.5
			-2.2316	36
			-2.07632	31
			-2.10191	13
			-0.640211	40
			2.95072	12
			-2.25281	38.5
			2.21868	19.5
			-0.905538	14
			0.278975	22
			0.347725	43
			-0.122809	5.5
			-0.699629	35
			-2.46979	17
			2.27241	63.5
			1.85615	130.5
			2.91708	34
			-2.74814	17
			3.05654	42.5
			-2.91837	27
			-2.20504	14
			2.85158	8
			-2.32623	18.5
			-3.02275	4.5
			3.0897	6
			-2.10243	21
			0.268574	37.5
			0.988743	28.5
			-0.634878	18.5
			2.63793	8.5
			-0.190489	49
			2.81474	14
			2.78157	17
			2.70914	32.5
			2.63687	5.5
			2.82777	29
			3.10978	5
			-2.3969	8.5
			2.57768	10
			-2.93185	6
			1.75792	11.5
			-2.65963	11.5
			1.97128	9.5
			2.35465	5
			3.04393	5.5
			0.805384	11
			-2.76348	13
			-2.64676	5
			1.53158	43
			1.84138	17
			3.06234	26.5
			1.74028	11
			3.03296	5
			1.31171	4.5
			-2.02884	7
			2.53479	7
			-1.2638	61.5
			-1.49593	10.5
			-2.33166	19
			-1.68119	11
			2.83206	9
			-2.78635	5.5
			2.49409	15
			2.96294	52.5
			2.75173	24
			2.72159	14.5
			3.01094	7
			-2.81521	4.5
			-2.34126	7
			-2.96796	12
			0.89072	9
			2.63318	10.5
			3.0327	48.5
			2.52368	10
			-2.67943	13.5
			-2.73008	11.5
			-2.53212	9
			-2.62413	9.5
			-1.31767	6
			-2.65903	13.5
			2.82457	12.5
			0.401886	8.5
			2.84117	15.5
			-2.47593	4.5
			-1.97469	8
			2.21484	11.5
			-3.13751	5
			2.94296	30
			-2.83416	4.5
			-2.28668	9.5
			-3.06808	10.5
			2.39763	19
			-1.23565	8.5
			-0.368188	36
			-0.984936	22
			-0.616197	4.5
			0.075489	7.5
			0.448818	12
			-1.57008	6.5
			1.7651	4.5
			3.09522	44
			3.11826	33
			-2.92261	24
			-2.68701	94.5
			-2.40506	43.5
			-2.28999	5
			2.64594	9.5
			2.26266	8.5
			2.16578	9
			-2.73391	23
			-1.95788	15.5
			-2.11703	23.5
			-0.523288	9.5
			-0.446184	4.5
			1.92246	34.5
			2.38842	5.5
			-1.72631	18
			1.66889	25
			0.348223	5.5
			1.87094	6
			1.82333	30.5
			2.90065	71.5
			0.816404	8
			-1.3984	5
			2.75667	8.5
			1.55299	6
			-0.972178	5
			-2.89423	16
			1.96845	45.5
			2.91521	58.5
			-2.38495	11
			-1.77347	12.5
			0.416631	8
			-0.12482	20
			2.37176	9.5
			0.672171	9
			3.12945	13.5
			2.77018	18.5
			1.96651	41.5
			2.63569	27.5
			2.45888	7.5
			2.46231	9.5
			2.4323	37.5
			2.41463	16.5
			-2.64877	13
			2.6697	16
			-1.72028	9.5
			2.98208	7.5
			-2.8533	26
			-2.35974	15
			3.12345	9.5
			-2.12554	11.5
			1.78998	15
			-2.45573	16
			-2.34813	6
			-2.93878	20.5
			-2.61527	7
			0.930126	15.5
			-1.11183	27.5
			-2.34625	44.5
			-2.83298	61
			-1.14556	4.5
			-3.01485	16.5
			2.9691	11.5
			-1.62646	16
			-2.17097	11.5
			2.06694	10.5
			-1.60044	21.5
			1.78554	10
			2.61877	10.5
			3.13621	26
			2.11211	19
			1.40044	10.5
			-2.50928	43.5
			-2.14746	23.5
			-1.04992	11.5
			2.82608	17
			-2.48948	10.5
			-1.88138	60.5
			3.11674	26.5
			-0.195646	13
			-2.85543	19
			2.76021	8.5
			2.82188	5.5
			2.81288	24.5
			2.82541	16
			-1.97615	22
			-2.03252	14.5
			-2.53478	14.5
			-2.45163	11
			0.930287	4.5
			-3.00207	8.5
			-2.28888	15.5
			-2.68015	15
			2.36483	7.5
			0.166001	17
			-1.05214	19
			-1.22234	25
			-0.492819	7.5
			0.0223742	9.5
			2.31415	7.5
			2.4125	18.5
			1.85769	11
			2.80958	19
			1.06203	7.5
			2.4492	16.5
			-2.18006	6.5
			2.52456	5
			2.49864	37.5
			1.58212	52.5
			2.31204	19
			-2.17858	6.5
			2.64108	11
			1.80877	6.5
			1.12306	15
			0.497354	26.5
			-0.585778	42.5
			2.29503	33
			-2.18426	19
			2.09506	45
			1.74018	31.5
			2.33495	36.5
			-2.82838	11
			2.29966	26
			1.31085	7
			-0.682883	7.5
			-2.98753	18.5
			-2.21594	30
			2.14508	7.5
			-2.01002	68
			1.48276	10
			2.41571	6
			0.231178	7.5
			-2.932	56
			0.502377	5.5
			1.99916	27.5
			-2.44229	12
			2.42255	8.5
			2.36598	5.5
			-1.73079	14
			-0.204182	14
			-2.92766	14
			2.3827	15
			-2.80981	4.5
			-2.71827	5.5
			-3.0184	7
			-2.01037	7
			1.18462	5
			-0.99994	7.5
			-1.89406	17.5
			0.226519	8.5
			-1.18742	4.5
			-1.67615	10
			1.42412	10
			1.99402	15
			2.03953	7
			0.188122	5.5
			0.944048	9
			-1.42378	5.5
			-1.16002	5
			-0.502856	28.5
			1.58317	11
			0.934399	5
			1.74313	4.5
			-0.684591	8
			-1.82981	4.5
			0.323001	4.5
			0.811254	13.5
			3.06114	5.5
			0.917192	29.5
			1.07571	8.5
			-1.2085	4.5
			-2.24674	19
			-1.39754	10.5
			2.6569	17
			2.02984	21.5
			1.26729	16
			-2.28572	5.5
			-1.16493	21.5
			2.76766	25
			-1.95414	21
			-1.05086	10
			0.0868751	11
			2.39467	18.5
			2.04538	11
			1.66063	6
			1.70244	7.5
			-0.102935	11
			1.33518	12
			-1.45968	22.5
			-2.73681	6
			2.90759	38
			1.74134	27.5
			-1.77428	37
			2.68885	23
			-0.149859	6.5
			-1.83417	4.5
			-0.839695	15
			-1.90166	7.5
			3.04663	6.5
			-1.02476	6
			2.59412	7
			-1.93726	5.5
			0.874235	10
			2.17335	13
			-3.10954	11.5
			1.77606	5
			-0.553971	21
			1.44963	19.5
			2.36414	25.5
			0.992123	14
			-3.12721	7.5
			-2.01401	14.5
			2.42425	5.5
			0.551603	5.5
			2.80782	10
			0.918981	4.5
			-1.30674	12.5
			2.91005	12
			-2.4746	7.5
			1.67402	8.5
			2.27222	7
			-1.98866	5
			-3.03764	5
			1.39069	9.5
			1.11618	5
			2.87216	12.5
			-0.813236	7.5
			0.197677	6
			1.76597	10
			-1.99909	10
			-2.76415	17
			0.437379	6
			1.15629	8
			-1.98708	28
			1.57052	10
			-1.26021	4.5
			1.6242	8
			0.268243	7
			1.27077	16.5
			-0.683514	10.5
			-2.69105	5
			-1.54791	10
			-2.12716	6.5
			-2.76007	11
			2.19012	17.5
			-2.31049	5.5
			-2.10678	25.5
			-2.36822	6.5
			-1.42992	66
			-0.299078	142
			-1.76091	13
			-1.49238	11.5
			-2.01862	21.5
			1.74952	11.5
			2.67007	7
			-0.514099	51
			-0.361413	26.5
			-2.18188	19
			-2.86146	5.5
			-0.671288	9.5
			1.89091	6
			0.567547	29.5
			-3.13879	7
			1.47915	34.5
			2.02163	6.5
			-0.318067	19.5
			2.76402	87.5
			2.09874	18.5
			2.29974	33.5
			-2.82298	21
			0.826999	5
			-2.80429	5.5
			-2.53459	8.5
			-0.609243	8
			-0.246854	12
			0.882663	15
			-2.81013	9.5
			0.300998	9
			-0.893924	20
			0.492337	5.5
			-2.72865	10
			1.27527	12.5
			0.225085	19
			1.67842	11
			-3.01949	4.5
			-2.69851	15
			-0.20516	11.5
			-0.79581	11.5
			-0.319582	4.5
			0.0167366	22.5
			-0.2912	15.5
			0.269376	17.5
			-0.659449	5.5
			-0.200243	8.5
			0.278438	11
			-2.64706	13.5
			-1.61344	27.5
			-1.80077	6.5
			-2.19021	17
			2.72622	4.5
			-2.18781	17.5
			-2.64031	5
			-2.78491	76.5
			-3.04129	14.5
			-2.61292	13.5
			1.47321	14.5
			-2.36604	6.5
			-2.63128	29.5
			-1.21306	8
			1.87625	5
			0.204953	5
			-1.89479	19.5
			1.00802	7.5
			2.25259	7
			-2.96693	5
			0.775648	11
			0.15468	6
			2.32006	10.5
			1.00006	10
			-3.04508	9.5
			1.46019	5
			2.22157	36
			2.40163	11.5
			-2.46299	32
			1.02649	9
			-2.68753	8.5
			-2.59541	22
			-2.84278	27.5
			2.03608	21.5
			3.1336	21
			3.08359	23
			-2.10109	34.5
			2.51904	23.5
			2.85879	28
			2.5782	25.5
			-3.13387	45.5
			2.22829	5.5
			-2.03382	6.5
			-2.2009	6.5
			1.77643	25.5
			-2.67426	13
			0.149984	4.5
			-1.50364	8
			-1.45792	5.5
			-3.10931	8
			-1.21832	5
			2.69025	7
			2.31054	6.5
			-0.114256	11
			-0.557223	9.5
			-0.485702	13
			-0.364472	13.5
			-0.266035	4.5
			2.23873	10
			-1.0427	20
			2.99383	5.5
			-3.07851	19
			-1.80967	5
			1.37498	6.5
			-0.302758	15.5
			0.441674	7
			2.71827	8
			-0.563158	5
			3.13847	16.5
			0.43295	15.5
			2.98432	14
			-2.37376	13
			-2.17484	7
			2.41127	10.5
			2.02421	5
			-2.9001	9
			-2.98599	12
			-2.76308	8.5
			2.14815	7.5
			2.72288	13.5
			-2.27925	37
			0.00853999	6.5
			-2.23024	25
			1.51577	8
			1.17879	4.5
			-1.25231	5.5
			3.08822	13
			-0.878593	14
			2.3221	14
			1.67074	11.5
			-1.92452	8.5
			2.24884	21.5
			1.05597	7
			-2.61972	8.5
			2.43045	5.5
			0.584696	7
			-0.296779	8
			0.399175	5
			-1.20844	11
			-2.99239	11.5
			-2.2312	13
			-2.96647	44.5
			2.55404	32.5
			-3.0376	14.5
			2.31924	6
			-2.65029	22.5
			2.8871	15
			2.15905	11
			-2.8462	48.5
			-2.3093	6.5
			-2.7162	7.5
			-2.5355	39
			-1.55496	24
			1.82963	25.5
			2.16246	30
			-2.61455	6.5
			-1.46111	13
			-2.47918	23
			-2.91288	46
			0.671081	10.5
			2.29799	9.5
			2.13846	12.5
			-0.933901	5
			-0.823245	16
			-0.998484	4.5
			2.98742	9
			-2.2734	6.5
			0.881995	10
			2.26828	6.5
			-1.0496	17
			2.85406	25
			-2.13237	39.5
			-0.173241	9
			1.52265	11.5
			-2.30021	7.5
			-2.07776	10.5
			-0.679877	11.5
			3.07727	11.5
			-1.74527	17
			1.4301	11
			1.98936	12
			2.35337	6.5
			2.8619	25
			-2.79479	22.5
			2.70134	10.5
			-2.66911	14
			2.29789	11.5
			-2.57372	42
			-2.9246	30.5
			-2.13177	10.5
			-3.00927	23
			-3.01064	7.5
			2.41987	6
			-1.3665	5.5
			-1.84814	5
			2.32438	7.5
			-0.972824	17
			-2.99334	22
			2.40307	6
			-2.53335	12.5
			2.89873	5.5
			1.49054	9
			1.91916	34.5
			-0.767822	5
			-1.98591	6.5
			1.23998	6.5
			2.07509	5.5
			-2.70408	25
			-2.14938	22.5
			0.82613	7
			-1.15873	5
			-1.67471	7
			-2.21528	17.5
			-1.03858	29.5
			-2.29042	21.5
			1.828	5
			-2.06784	25.5
			-3.03993	12
			-3.01358	15.5
			2.91926	26.5
			2.94102	5.5
			-1.68413	8
			2.08462	8
			-3.07532	21.5
			-2.93506	24.5
			-2.29674	12
[truncated: 1,912 more rows]

## Sheet: Fig 6DE
Time to cooling offset(s)	-40	-39.5	-39	-38.5	-38	-37.5	-37	-36.5	-36	-35.5	-35	-34.5	-34	-33.5	-33	-32.5	-32	-31.5	-31	-30.5	-30	-29.5	-29	-28.5	-28	-27.5	-27	-26.5	-26	-25.5	-25	-24.5	-24	-23.5	-23	-22.5	-22	-21.5	-21	-20.5	-20	-19.5	-19	-18.5	-18	-17.5	-17	-16.5	-16
instantaneous velocity	0.862883	1.06876	2.49365	2.55628	1.95145	3.70468	1.54748	2.15951	3.67391	2.21299	2.33211	0.872723	2.43633	2.73502	0.931497	3.21289	0.951562	-4.68846	-1.63863	-0.689323	-1.16871	-0.625111	-4.36712	-1.01487	-2.53063	-2.38686	-1.2326	-0.816783	-0.414214	-0.150282	-0.353081	-0.129123	-0.657369	-1.58603	-0.969592	1.80467	1.82788	0.777228	1.6305	2.1033	1.52955	3.65563	1.10126	1.89494	1.75524	1.21249	2.0395	1.05432	3.70457
	0.951562	-4.68846	-1.63863	-0.689323	-1.16871	-0.625111	-4.36712	-1.01487	-2.53063	-2.38686	-1.2326	-0.816783	-0.414214	-0.150282	-0.353081	-0.129123	-0.657369	-1.58603	-0.969592	1.80467	1.82788	0.777228	1.6305	2.1033	1.52955	3.65563	1.10126	1.89494	1.75524	1.21249	2.0395	1.05432	3.70457	3.2484	1.75853	0.994672	1.45708	1.1375	1.94197	3.83054	1.44677	-0.238937	-0.369642	-0.778799	-2.51189	-2.12463	-0.468445	-0.872243	-0.954508
	1.89536	1.81877	1.42271	2.84219	1.89678	2.24872	2.50055	2.72625	1.87171	1.57997	1.47778	1.5357	1.83927	0.60199	0.321251	1.78435	4.93189	2.4555	0.764437	0.560457	2.15314	1.6687	1.49164	1.52165	0.564358	0.898192	3.34459	3.05762	1.81212	1.3699	2.54757	2.17398	0.936041	2.76989	1.44957	1.79346	2.25438	1.78974	2.26743	1.31262	0.550377	0.212094	0.542211	0.843862	0.449116	-0.268214	-0.373038	-0.306983	-0.241455
	1.49081	2.26333	1.1077	0.672427	2.91062	4.43261	0.997933	2.40118	2.12383	2.2568	1.47915	-1.87286	-2.59945	-1.65586	-1.09436	-1.57508	-2.05045	-2.50692	-0.834606	-0.316917	-0.106322	-0.496512	-0.323136	-0.967649	-0.343447	-1.25256	-1.09444	-0.845459	-1.82252	-1.81481	-3.027	1.77184	1.4434	1.64543	2.6344	2.81003	1.54508	1.9696	2.71939	1.44864	1.18225	2.53517	1.44815	1.57723	-2.75858	-1.61416	-1.66336	-1.64336	-0.639647
	-2.07201	-0.947224	-1.52208	-1.48473	-1.27958	-0.300988	-0.297145	-0.731879	-0.47924	-0.641937	-0.155811	-0.165564	-0.464726	-1.1621	-0.879586	-1.89133	-2.05029	2.95648	2.99085	1.26012	1.69457	1.18981	2.68429	3.65638	3.58836	1.64602	1.09114	1.23535	2.35801	3.24656	1.90006	1.19214	1.32486	1.6745	1.8335	1.43287	0.635192	0.423209	1.39959	2.95723	2.07003	-1.65888	-1.31043	-2.6502	-1.78396	-2.72084	-1.74894	-1.02865	-0.120669
	2.38716	0.134084	3.86725	3.2942	1.22712	2.20954	3.11562	1.30855	2.428	2.67061	5.08367	1.06511	2.13453	2.39511	4.97765	2.0222	1.38892	1.8738	4.30712	1.65899	1.74277	1.25324	2.02403	3.02306	1.40718	2.4294	2.28903	3.94141	1.44946	1.19975	0.324153	0.810239	1.71093	2.40779	1.44417	1.49187	2.41797	1.97545	2.65098	3.00518	3.80097	2.91993	0.659766	1.93853	2.78964	1.3922	1.46699	2.12918	2.24582
	1.88257	1.58183	1.694	2.72622	3.56069	2.36114	2.13436	-0.902009	-3.77602	-0.870255	-0.785268	-2.19223	-1.2856	-1.25065	-0.327302	-0.571701	-0.439968	-0.239877	-0.152381	-0.0850507	-0.0568476	-0.84089	-8.7659	-0.860114	-1.03281	-0.481808	1.47807	1.17242	0.534426	0.36189	0.323679	0.636807	1.30541	0.853032	1.75702	1.50382	1.33147	6.90551	2.94203	2.8961	3.31533	2.27103	2.53889	1.38914	3.24939	2.06353	2.51962	2.09925	1.27152
	1.23178	4.20207	3.33499	1.82036	1.64566	3.41805	2.76842	2.40096	2.57589	2.85448	1.73267	2.85723	1.77358	3.15761	2.87454	2.85523	-0.970037	-1.54612	-2.48829	-1.97592	-2.1495	-2.22536	-1.40286	-1.58533	-1.73883	-1.17225	-1.12441	-2.50187	-0.951585	-1.38818	-0.769519	-2.43232	2.47176	2.46508	2.36228	1.79656	2.55932	2.06219	1.41376	1.1795	1.02481	0.618952	0.723975	0.22467	0.164551	2.33361	2.13919	2.24009	2.4197
	-1.64866	-0.814873	-1.80813	-2.04449	-0.306623	-1.00437	-0.0530864	-0.289023	-0.621003	-0.412826	-1.70425	2.68026	4.37637	0.57305	1.35884	2.71788	4.64343	1.63756	3.42434	2.79305	3.17307	1.85059	1.76288	2.04942	-2.18428	-2.44932	-0.571054	-0.261547	-0.431066	-3.03642	1.84439	1.95133	3.42756	2.10117	2.39336	2.06748	1.37748	1.7758	2.55221	0.448282	0.847899	0.3371	0.499653	0.700194	2.11816	3.1339	1.96797	2.8742	2.91166
	-0.412826	-1.70425	2.68026	4.37637	0.57305	1.35884	2.71788	4.64343	1.63756	3.42434	2.79305	3.17307	1.85059	1.76288	2.04942	-2.18428	-2.44932	-0.571054	-0.261547	-0.431066	-3.03642	1.84439	1.95133	3.42756	2.10117	2.39336	2.06748	1.37748	1.7758	2.55221	0.448282	0.847899	0.3371	0.499653	0.700194	2.11816	3.1339	1.96797	2.8742	2.91166	3.05457	2.92023	3.08508	-2.47199	-2.425	-0.456702	-3.86177	-2.28946	-2.38025
	0.769884	1.2975	1.73286	3.09907	2.04505	-1.92212	-1.94077	-2.67248	-3.18463	-2.18912	-2.4275	-1.71126	-1.96883	-3.57221	-2.27975	-0.931186	-0.425012	-0.404849	-2.62684	-3.07533	-1.51112	-3.22325	-1.93606	-1.94472	-0.224614	-0.492119	-0.326976	-0.475944	-0.262232	-0.507737	-1.88737	-3.04192	-1.76229	1.99251	2.64736	3.07915	1.8074	2.85394	2.1472	2.08129	2.17016	3.47965	2.42753	1.67198	1.32782	1.09003	1.8241	3.13156	3.0921
	0.231665	1.45259	1.57278	0.438324	1.39804	-1.14576	-1.51723	-1.7061	-1.50866	-0.173183	-0.11019	-0.747584	-0.656022	-1.57168	-3.24868	3.02009	4.05543	0.811496	1.96628	2.16949	2.15797	1.4913	2.15473	3.1532	0.853073	2.52123	2.2757	2.73339	0.219157	0.812977	0.391847	1.52057	1.16234	1.00056	1.73842	2.15147	2.49674	1.65392	0.478682	2.37404	2.95323	2.58995	3.40806	2.08816	2.40372	3.83893	2.91772	1.31269	1.6401
	1.4913	2.15473	3.1532	0.853073	2.52123	2.2757	2.73339	0.219157	0.812977	0.391847	1.52057	1.16234	1.00056	1.73842	2.15147	2.49674	1.65392	0.478682	2.37404	2.95323	2.58995	3.40806	2.08816	2.40372	3.83893	2.91772	1.31269	1.6401	1.99781	2.56844	2.02153	1.08842	1.09854	2.43669	2.51343	2.25795	1.13651	2.41969	3.11153	1.87493	2.04137	2.08176	1.75105	2.19586	3.33943	1.59603	0.722457	2.52461	2.54879
	3.56901	2.29959	2.57641	3.19533	4.10402	1.33925	1.59479	1.71949	3.29735	3.22456	1.50579	1.70456	2.62557	2.84009	2.85072	1.19831	2.65671	2.82802	2.67802	2.10338	1.44185	3.13675	1.81988	2.81609	2.58987	1.43667	1.84522	2.67455	4.17566	1.66886	2.07483	3.63386	1.93462	2.24668	2.32865	1.50156	2.5149	2.67216	2.63439	2.37916	2.84243	3.2374	2.08173	2.44367	1.92986	1.09887	3.17488	2.67403	1.4551
	1.71949	3.29735	3.22456	1.50579	1.70456	2.62557	2.84009	2.85072	1.19831	2.65671	2.82802	2.67802	2.10338	1.44185	3.13675	1.81988	2.81609	2.58987	1.43667	1.84522	2.67455	4.17566	1.66886	2.07483	3.63386	1.93462	2.24668	2.32865	1.50156	2.5149	2.67216	2.63439	2.37916	2.84243	3.2374	2.08173	2.44367	1.92986	1.09887	3.17488	2.67403	1.4551	2.17205	2.46696	2.38524	9.25612	0.372181	0.56818	1.49965
	2.33749	2.28396	2.25469	3.12208	2.39606	2.30683	4.04235	2.0056	2.07857	1.21997	-3.37389	-2.85458	-1.87341	-2.07837	-0.0957775	-3.5186	-2.12285	-4.36738	-2.93673	-1.37241	-2.10024	-2.40398	-2.31031	-0.664038	-0.320584	-0.586986	-0.756913	-0.738347	-1.92391	-3.8922	1.952	1.81262	3.43716	3.1378	3.00883	2.60285	3.2013	3.60754	2.42431	1.84131	1.92948	-3.04917	-2.04612	-4.03052	-2.22849	-0.806488	-0.19068	-0.523762	-1.66026
	3.43289	1.37364	2.50001	3.56983	2.05209	1.74864	2.29955	2.16944	3.74277	-1.30817	-3.16268	-2.47679	-2.29578	-0.0461858	-2.39748	-2.22408	-2.015	-1.73496	-3.91148	-1.75057	-0.904547	-0.764319	-1.258	-0.303459	-0.573942	-0.946212	-3.01133	3.10541	2.91392	2.43868	3.01133	2.69477	2.30374	2.83982	2.21081	3.7787	4.20868	2.45527	1.78316	1.59699	2.35204	-1.51941	-2.53577	-1.99293	-2.28117	-1.4758	-1.30116	-0.815631	-0.615878
	-0.761689	-0.784144	-1.5135	-0.673828	-0.745396	-1.55201	-2.46398	-1.01634	-1.20559	-1.54944	-2.06786	-0.947059	-0.596095	-0.580961	-0.276039	-0.871596	-1.11794	-1.25795	-0.716492	-0.928311	-0.10115	-1.17535	1.17685	0.714658	0.808399	1.64527	2.89083	1.80731	0.578078	1.09479	2.70376	2.58506	2.26243	2.4448	2.65236	2.50728	2.46038	3.83856	1.76878	1.76449	3.41324	0.202705	0.479299	0.111038	0.0661639	0.902399	0.939032	1.52696	1.56303
	0.202705	0.479299	0.111038	0.0661639	0.902399	0.939032	1.52696	1.56303	0.989969	1.96786	2.94046	2.25266	2.03662	0.994812	-2.99293	-2.89758	-1.89015	-3.16005	-1.9727	-4.04517	-2.63274	-1.20464	-0.136968	-0.210135	-0.347153	-0.442952	-0.34712	-0.197843	-0.861008	-0.783156	-2.01341	-1.03147	-1.4376	-1.73826	-1.38518	-1.71106	0.640035	1.4854	4.04739	2.81934	0.991314	0.0682289	0.773044	2.17553	2.28397	0.973147	2.03726	1.49199	1.35513
	-2.89758	-1.89015	-3.16005	-1.9727	-4.04517	-2.63274	-1.20464	-0.136968	-0.210135	-0.347153	-0.442952	-0.34712	-0.197843	-0.861008	-0.783156	-2.01341	-1.03147	-1.4376	-1.73826	-1.38518	-1.71106	0.640035	1.4854	4.04739	2.81934	0.991314	0.0682289	0.773044	2.17553	2.28397	0.973147	2.03726	1.49199	1.35513	4.00652	2.31066	2.15672	2.07728	2.46128	2.96375	2.73923	0.570987	2.67877	1.42734	1.06027	0.869562	0.784273	0.904724	0.887959
	-1.73826	-1.38518	-1.71106	0.640035	1.4854	4.04739	2.81934	0.991314	0.0682289	0.773044	2.17553	2.28397	0.973147	2.03726	1.49199	1.35513	4.00652	2.31066	2.15672	2.07728	2.46128	2.96375	2.73923	0.570987	2.67877	1.42734	1.06027	0.869562	0.784273	0.904724	0.887959	1.66346	2.16169	1.14016	2.39472	1.57717	2.27972	1.52099	1.69904	1.86964	3.11938	1.81111	0.0899909	0.28234	1.63986	2.21707	1.13144	1.71899	4.77227
	-1.79427	-3.13817	-2.18429	-1.2059	-1.91471	-2.17028	-2.31344	-0.98941	-1.3234	-0.790879	1.04723	2.1833	4.4102	1.68171	3.00905	2.80434	2.96191	4.36061	1.21876	1.56918	4.28405	4.11434	2.37727	2.92453	4.62548	2.313	3.48919	4.27172	3.59782	2.01458	1.73326	2.17535	2.5831	3.40913	3.2428	2.49073	1.8513	1.40344	2.72927	5.32525	2.42154	-4.11505	-2.51272	-2.93455	-1.79865	-2.32039	-1.47241	-0.584355	-4.60423
	-2.16907	-4.86617	2.03939	1.63972	1.93355	2.84246	2.55824	2.08467	1.97402	2.35845	2.48623	3.35713	2.23889	0.804255	1.37953	1.6833	-0.396725	-0.848295	-1.90199	-0.700497	-0.577351	-0.745938	-0.132333	-0.13494	-1.64741	-1.29533	3.08074	3.51561	1.37405	1.12043	2.07724	1.89728	1.01585	3.188	2.36984	1.57498	1.06935	2.90932	3.18249	0.430739	1.76534	0.735237	0.669892	-0.376246	-1.34667	-0.633663	-1.29514	-1.78838	-2.45913
	-1.25453	-0.895795	-0.175858	-1.68985	-1.80842	-2.33653	-2.86439	-2.29312	-2.54694	-2.96993	-2.2852	-1.93619	-1.50483	-1.66898	-1.7744	-1.83539	-1.73561	-1.40232	-0.183069	-0.499611	-1.48897	-0.505486	-0.321432	-0.789407	-1.24474	-1.90873	-1.50122	2.94388	1.78192	3.28995	0.993423	1.04252	1.12052	1.37809	1.56794	1.59533	0.868631	2.66003	2.56649	1.84496	1.53523	1.98086	2.18289	1.46221	1.51121	3.26749	1.4527	0.448947	0.9261
	-2.2852	-1.93619	-1.50483	-1.66898	-1.7744	-1.83539	-1.73561	-1.40232	-0.183069	-0.499611	-1.48897	-0.505486	-0.321432	-0.789407	-1.24474	-1.90873	-1.50122	2.94388	1.78192	3.28995	0.993423	1.04252	1.12052	1.37809	1.56794	1.59533	0.868631	2.66003	2.56649	1.84496	1.53523	1.98086	2.18289	1.46221	1.51121	3.26749	1.4527	0.448947	0.9261	2.45698	2.78766	2.72054	0.543187	2.59591	2.76752	0.632261	0.975894	3.51368	3.63952
	1.51121	3.26749	1.4527	0.448947	0.9261	2.45698	2.78766	2.72054	0.543187	2.59591	2.76752	0.632261	0.975894	3.51368	3.63952	2.04083	0.643917	2.68284	3.14073	0.401779	2.27316	4.04065	3.27886	2.53217	1.94138	1.91336	1.5997	2.84668	3.25203	1.88965	1.58542	1.79707	1.79819	2.87937	2.67469	2.04385	0.943089	1.69936	2.96331	2.79909	1.79553	1.7479	0.608116	0.803436	0.674105	2.12925	2.2844	2.28877	0.3481
	2.13248	3.50068	1.49343	2.38696	0.896239	0.775814	2.16317	2.06168	3.99828	2.61122	1.19976	2.69698	4.73057	2.13915	1.99004	3.62825	4.05248	1.51529	1.58193	3.48479	2.41332	1.95049	1.45219	1.61083	2.11532	2.81642	3.10967	0.954936	1.09409	3.38454	3.33869	2.43687	2.15665	3.15641	2.4889	3.47921	1.42458	2.68037	2.84405	1.38938	1.76735	2.76065	2.21927	1.43861	2.166	1.25848	5.28995	2.08369	3.34302
	3.63664	3.41632	3.12232	2.23921	4.85778	1.69642	2.10661	2.81678	6.6122	1.90943	1.19105	1.94471	4.25462	0.417472	2.36851	6.14393	2.7041	2.28323	4.35542	4.43486	1.45568	1.62374	3.61961	1.38945	1.55613	2.16267	5.31434	1.41689	3.39007	1.1688	2.00569	3.36381	3.93385	2.08452	2.88346	5.27454	1.82318	0.76927	2.33275	3.17075	3.70904	1.8045	3.21581	1.5972	2.47966	4.70865	2.98624	1.82798	2.98493
	1.83754	2.6254	4.72857	2.61239	1.54338	2.58371	3.30131	4.19774	1.51812	0.466125	2.50372	-1.74995	-2.64841	-0.880827	-2.17293	-0.225903	-0.429086	-1.54226	-2.26287	-0.327527	-0.934232	-1.07271	-0.439469	-0.498095	-0.985357	-0.242429	-0.652892	-0.488139	4.02871	3.52685	3.336	1.77699	1.83496	1.87525	3.92915	1.30861	1.47961	1.78243	1.83401	1.32061	0.167076	0.742125	0.64676	0.392132	0.480867	1.83207	1.06312	2.55173	3.61907
	1.51812	0.466125	2.50372	-1.74995	-2.64841	-0.880827	-2.17293	-0.225903	-0.429086	-1.54226	-2.26287	-0.327527	-0.934232	-1.07271	-0.439469	-0.498095	-0.985357	-0.242429	-0.652892	-0.488139	4.02871	3.52685	3.336	1.77699	1.83496	1.87525	3.92915	1.30861	1.47961	1.78243	1.83401	1.32061	0.167076	0.742125	0.64676	0.392132	0.480867	1.83207	1.06312	2.55173	3.61907	3.14839	3.15367	1.66489	1.97623	3.45682	3.79083	2.06888	3.63466
	-0.429086	-1.54226	-2.26287	-0.327527	-0.934232	-1.07271	-0.439469	-0.498095	-0.985357	-0.242429	-0.652892	-0.488139	4.02871	3.52685	3.336	1.77699	1.83496	1.87525	3.92915	1.30861	1.47961	1.78243	1.83401	1.32061	0.167076	0.742125	0.64676	0.392132	0.480867	1.83207	1.06312	2.55173	3.61907	3.14839	3.15367	1.66489	1.97623	3.45682	3.79083	2.06888	3.63466	2.34664	2.04475	3.82369	4.63971	1.61303	1.42862	3.99764	3.23705
	1.83401	1.32061	0.167076	0.742125	0.64676	0.392132	0.480867	1.83207	1.06312	2.55173	3.61907	3.14839	3.15367	1.66489	1.97623	3.45682	3.79083	2.06888	3.63466	2.34664	2.04475	3.82369	4.63971	1.61303	1.42862	3.99764	3.23705	2.84206	2.17383	3.74337	1.54451	2.76723	2.68832	4.81874	1.33981	2.41241	1.61724	2.49556	3.72556	2.49286	2.65514	2.27076	2.6541	1.54559	3.46557	2.62084	1.63864	0.859773	0.980847
	3.61907	3.14839	3.15367	1.66489	1.97623	3.45682	3.79083	2.06888	3.63466	2.34664	2.04475	3.82369	4.63971	1.61303	1.42862	3.99764	3.23705	2.84206	2.17383	3.74337	1.54451	2.76723	2.68832	4.81874	1.33981	2.41241	1.61724	2.49556	3.72556	2.49286	2.65514	2.27076	2.6541	1.54559	3.46557	2.62084	1.63864	0.859773	0.980847	2.93855	0.681575	1.19152	1.85315	0.972821	4.85526	3.31387	1.59369	3.70613	2.62447
	-0.998494	-1.75395	-1.95146	-1.70427	-2.04164	-1.47385	-0.715198	-0.829017	-0.298186	-0.371638	-1.96781	-4.26571	-2.62663	-3.82281	-1.72941	-0.890287	-0.558883	-1.88276	-1.40604	-1.5515	-0.313462	-1.26918	-0.516486	-0.548621	-0.610122	2.32593	2.10756	2.36869	1.34297	2.6915	3.21602	3.05726	2.31551	1.15963	2.02011	0.937094	1.65447	3.64603	1.55715	1.7282	0.681481	0.568979	3.31015	1.36073	2.84734	3.21236	4.01023	-2.39811	-1.67538
	1.34297	2.6915	3.21602	3.05726	2.31551	1.15963	2.02011	0.937094	1.65447	3.64603	1.55715	1.7282	0.681481	0.568979	3.31015	1.36073	2.84734	3.21236	4.01023	-2.39811	-1.67538	-2.58273	-0.949897	-0.178054	-1.2132	-1.61613	-1.29121	-2.02408	-2.57944	2.78351	1.33223	4.14111	3.65327	1.93192	3.34329	3.01219	3.59837	1.55699	2.72404	3.45167	3.34557	2.02188	2.45194	4.87647	2.85507	1.49614	4.51349	4.28391	2.34812
	4.87647	2.85507	1.49614	4.51349	4.28391	2.34812	3.07863	3.63529	1.67658	2.82276	3.3302	2.91708	2.13093	3.38352	1.22297	4.27914	3.52487	1.04808	1.73378	4.37842	0.832728	2.5601	2.67825	1.58266	1.00965	2.91353	3.61953	2.07449	1.55278	3.67769	3.40255	1.88353	2.64766	3.82276	1.94916	2.45882	2.7695	2.9926	3.42507	3.48003	2.60748	2.96391	3.97191	3.79022	2.17662	2.56821	3.37368	3.36397	2.36818
	0.728106	2.48229	2.53563	1.59922	1.92045	2.23385	2.43562	4.25107	2.64364	3.32751	4.55727	1.62654	2.94264	3.56925	3.00712	1.71666	1.89468	4.23904	2.83874	2.67442	3.03385	2.30725	3.19855	1.59163	3.53173	4.05209	2.2093	2.54803	2.38152	2.70939	1.51104	2.05529	1.60679	3.40312	3.32478	2.29952	2.38956	2.47388	2.47334	1.53583	2.93109	3.5124	1.56821	4.24418	2.13719	1.31811	1.7622	3.0321	3.46565
	2.29952	2.38956	2.47388	2.47334	1.53583	2.93109	3.5124	1.56821	4.24418	2.13719	1.31811	1.7622	3.0321	3.46565	2.59537	3.6438	1.9287	2.75061	1.92362	5.55118	2.59484	2.76914	3.15278	2.37461	2.16768	3.61646	4.59234	1.19465	1.84725	2.80381	3.28169	1.49902	2.14623	4.22431	2.97889	1.0333	2.47	1.96117	3.72822	2.28853	2.44839	2.43137	2.93187	1.90998	3.1313	3.18078	2.14793	4.74201	2.74444
	1.90998	3.1313	3.18078	2.14793	4.74201	2.74444	1.60532	2.17197	3.82529	3.55671	2.5049	2.39045	3.48033	2.27748	3.76164	1.02756	-3.211	-1.71306	-0.639563	-3.13112	-3.03183	-0.541535	-2.44468	-0.887523	-0.949856	-1.57987	-2.14668	-1.35086	-2.70345	-1.21476	-2.11939	1.67101	2.49579	3.99262	1.95875	1.75619	3.27495	2.75007	3.3681	2.88366	2.19234	3.49024	1.93522	2.19577	1.65219	2.60535	1.77109	3.48557	3.38539
	1.65219	2.60535	1.77109	3.48557	3.38539	1.03325	2.56658	3.08696	3.59126	2.34008	4.8248	3.27845	-2.1392	-0.629938	-0.725556	-3.16647	-1.81727	-0.623644	-0.38351	-0.797958	-2.95942	3.24923	4.91603	2.95582	2.71026	1.94595	3.43971	3.93016	2.75769	1.74289	4.29244	3.43706	2.46931	3.69501	3.78216	2.65226	3.27525	2.51893	2.90656	2.17078	1.6831	2.20499	3.04096	4.23698	2.14009	1.76593	3.30578	4.16267	1.82416
	1.94595	3.43971	3.93016	2.75769	1.74289	4.29244	3.43706	2.46931	3.69501	3.78216	2.65226	3.27525	2.51893	2.90656	2.17078	1.6831	2.20499	3.04096	4.23698	2.14009	1.76593	3.30578	4.16267	1.82416	2.93032	2.8273	3.61811	2.07558	3.8195	1.94676	1.95929	1.49111	1.59451	3.74549	1.69487	2.25732	2.21801	2.92744	2.11906	3.25842	3.4457	-3.08549	-2.2554	-2.71219	-2.84332	-1.80757	-2.7714	-0.447139	-0.216908
	-3.32111	-1.30051	-4.87785	-1.86898	-1.70429	-2.47997	-5.33813	-2.03942	-1.78523	-2.03003	-1.92969	-2.39182	-1.81908	-0.608069	-0.600235	-1.03824	-0.628692	-0.825017	-2.23855	-2.74098	2.07316	3.17616	3.04391	3.16127	3.69167	2.43216	1.01925	1.80062	6.28998	2.56391	1.77532	2.43962	3.02261	3.39304	2.98634	2.96634	3.26396	2.94645	1.30637	4.14819	4.53124	2.47472	2.66043	1.50444	2.64012	3.82465	2.51068	2.15439	3.05421
	6.28998	2.56391	1.77532	2.43962	3.02261	3.39304	2.98634	2.96634	3.26396	2.94645	1.30637	4.14819	4.53124	2.47472	2.66043	1.50444	2.64012	3.82465	2.51068	2.15439	3.05421	2.90606	2.86769	2.44782	4.10104	2.56016	1.8133	2.46616	3.31511	2.5236	3.6478	2.29339	2.65987	2.89959	2.53758	3.47281	2.44095	1.51307	2.05868	2.85643	1.94919	1.8534	1.78726	3.00731	1.5397	1.15799	2.24658	3.90935	1.02092
	2.85643	1.94919	1.8534	1.78726	3.00731	1.5397	1.15799	2.24658	3.90935	1.02092	-2.54006	-0.999583	-0.813873	-0.603872	-4.28649	-2.07328	-2.1049	-1.39987	-0.977011	-0.360493	-2.17576	-3.38206	-3.00793	-3.58324	-2.67491	-0.927322	-1.99307	-2.17904	-0.779728	-0.451238	-0.522919	-0.410343	-0.491994	-2.02433	2.1012	2.05715	2.93182	3.09025	1.46732	3.5833	3.84134	2.97004	3.03958	2.2198	1.89353	4.64771	1.71584	3.29756	2.98414
	5.45424	1.56268	1.74416	2.10708	1.00212	3.36548	3.77139	1.4529	1.51637	3.40204	2.29551	3.02456	1.83604	1.3564	2.13969	5.29686	3.87408	2.81718	4.32107	2.89143	1.57309	2.0461	2.53314	4.16298	3.55428	1.5933	3.55619	3.59712	2.29812	3.5611	3.80037	4.84146	1.1347	2.47029	4.01006	3.10851	2.44023	2.30062	2.27484	3.32689	3.85052	3.28737	2.09359	3.60267	3.59694	1.977	2.91349	4.8811	2.02144
	0.251606	1.47067	0.406399	0.219916	0.0731591	0.0833135	0.0255975	0.228761	0.227847	0.0962652	0.395411	0.636564	0.543247	1.41202	1.12948	0.156968	0.796114	0.843436	0.562695	1.14507	1.58939	0.0676803	1.01288	2.66329	1.8981	0.507047	0.867841	3.02647	1.77812	0.792921	0.466397	0.391301	1.09066	1.68665	0.47282	0.911631	0.458504	0.0599403	1.59141	1.95393	1.42191	1.41032	3.12802	2.99908	1.04953	1.04347	1.20344	2.07849	2.43121
	-2.20773	-2.45691	-0.253168	-1.24883	-2.34067	-2.15223	-3.04892	-2.06775	-2.85238	-2.27071	-0.602175	-2.66193	-2.83707	-0.871363	-1.29949	-1.79926	-2.14414	-0.527888	-1.35229	-0.513951	-0.43203	-0.236674	-0.515249	-0.51169	-0.952088	-1.89344	-1.95857	-2.91982	-2.27915	-0.213726	1.50916	1.60031	3.04867	0.860856	0.730781	1.57329	1.5666	0.831757	1.32464	1.83667	0.788423	-1.19242	-0.276358	-0.282226	-0.355286	-0.684748	-0.066241	-0.487892	-0.274514
	-1.11411	-1.17411	-0.841246	-1.1404	-1.65754	-0.648064	-1.09351	-0.393257	-0.386568	-0.41867	-1.3099	-1.72198	1.53551	1.60124	1.59833	1.65264	1.65632	1.86736	1.03072	1.88971	1.13562	2.94766	2.66448	0.439053	1.82838	3.21946	4.69889	1.7436	1.18747	0.633717	3.58992	1.39906	1.14848	2.07254	1.82578	2.0122	1.19736	0.14261	1.26794	1.22345	2.04029	2.53288	1.14964	1.3201	1.75617	-1.67579	-2.49942	-2.45237	-1.70259
	-1.45823	-1.24429	-0.808907	-0.608802	-1.76411	-2.78969	-1.70032	-1.39241	-1.59993	-1.41424	-1.54535	-0.914903	-2.40983	-1.84097	-1.57339	-0.854363	-0.373309	-1.0827	-1.22009	-2.01066	-3.63298	-1.66295	-2.34779	-1.83855	-2.37683	-1.39253	-2.54998	-1.10898	-0.0259307	-0.705653	-0.25885	-0.831828	-0.492438	-0.463888	-0.4326	-1.97168	0.682394	1.22337	1.13571	1.82331	1.28429	1.43343	0.846269	1.58621	1.2309	0.514327	0.402363	-1.55232	-1.45069
	1.23028	2.01429	0.92532	1.81598	2.92444	0.688333	3.04107	2.80977	1.35405	2.61686	1.79361	0.980656	2.38384	1.47076	2.76059	0.996894	1.87441	2.95542	2.05697	1.39548	1.14151	0.627566	0.0955226	1.87414	0.742418	2.48372	1.79027	0.859808	0.418016	0.607502	1.20914	1.93345	1.43896	1.95148	2.06522	0.922606	0.391943	1.20225	0.532348	0.638491	1.44681	0.371786	-0.269989	-1.77873	-2.48144	-0.363672	-0.370147	-1.30157	-0.73404
	-1.52537	-1.38992	-1.55176	-2.12812	-1.6911	-2.12338	-1.3783	-0.589539	-0.409943	-0.324978	-0.754463	-0.320328	-0.309125	-0.291609	-2.0065	-1.29012	-1.09205	-1.05477	-0.575121	2.01524	3.15262	1.79401	0.325211	0.400694	0.834015	0.815066	1.52863	1.59546	0.832457	1.25583	0.728939	1.99971	0.531098	1.67147	2.78058	0.779509	0.679748	1.60553	1.21944	1.20967	1.1993	-0.552707	-1.2277	-1.16492	-1.61883	-0.767142	-0.826802	-2.36668	-1.9447
	-0.257797	-0.240355	-2.00844	-0.815345	-1.98943	-2.00098	-1.6424	-2.06113	-2.62706	-1.76477	-0.793376	-0.609177	-1.13492	-1.82533	-1.23844	-0.0953643	-0.841957	-0.287219	-0.318347	-0.345326	-0.547643	-0.345508	-1.44539	-0.890179	-1.22543	-0.438995	-0.436391	2.38622	3.29569	1.64351	1.17281	0.813637	0.79922	0.511517	0.267943	2.29023	2.25295	2.62193	1.24536	1.37999	0.585318	0.113143	2.55611	3.44726	1.46759	1.83194	0.376724	0.68227	2.07231
	-0.841957	-0.287219	-0.318347	-0.345326	-0.547643	-0.345508	-1.44539	-0.890179	-1.22543	-0.438995	-0.436391	2.38622	3.29569	1.64351	1.17281	0.813637	0.79922	0.511517	0.267943	2.29023	2.25295	2.62193	1.24536	1.37999	0.585318	0.113143	2.55611	3.44726	1.46759	1.83194	0.376724	0.68227	2.07231	0.692981	0.816756	0.628781	0.656464	0.752783	0.138391	0.8296	0.90186	0.417539	0.92629	3.81569	0.854939	0.49083	1.03826	1.33018	0.23205
	1.64351	1.17281	0.813637	0.79922	0.511517	0.267943	2.29023	2.25295	2.62193	1.24536	1.37999	0.585318	0.113143	2.55611	3.44726	1.46759	1.83194	0.376724	0.68227	2.07231	0.692981	0.816756	0.628781	0.656464	0.752783	0.138391	0.8296	0.90186	0.417539	0.92629	3.81569	0.854939	0.49083	1.03826	1.33018	0.23205	1.39489	0.142554	0.0832319	0.663297	1.06639	0.301164	0.312582	2.38037	0.864742	0.37023	0.307738	0.321753	0.777532
	1.46759	1.83194	0.376724	0.68227	2.07231	0.692981	0.816756	0.628781	0.656464	0.752783	0.138391	0.8296	0.90186	0.417539	0.92629	3.81569	0.854939	0.49083	1.03826	1.33018	0.23205	1.39489	0.142554	0.0832319	0.663297	1.06639	0.301164	0.312582	2.38037	0.864742	0.37023	0.307738	0.321753	0.777532	1.4432	0.876816	1.19883	0.678468	0.667634	0.478703	0.426866	0.444924	0.921622	1.05319	0.682815	0.264582	0.311965	0.942826	1.73446
	1.33018	0.23205	1.39489	0.142554	0.0832319	0.663297	1.06639	0.301164	0.312582	2.38037	0.864742	0.37023	0.307738	0.321753	0.777532	1.4432	0.876816	1.19883	0.678468	0.667634	0.478703	0.426866	0.444924	0.921622	1.05319	0.682815	0.264582	0.311965	0.942826	1.73446	1.57039	2.00754	0.917037	0.790442	2.12711	2.84569	0.651175	0.418724	0.641078	0.968285	0.609695	0.202729	0.674912	-1.72372	-0.271455	-0.926764	-0.720383	-0.811296	-0.0313012
	-0.0651727	-1.53912	-1.16843	-0.877426	-0.648529	-0.865667	-0.985824	-0.0913784	-2.52709	-2.16284	-0.426796	-2.74568	-2.04987	-0.222009	-0.593349	-0.132649	-0.0522398	-0.801986	-0.500291	-1.14497	1.04857	1.46861	0.377679	1.29996	2.35426	1.18427	1.40141	2.1558	3.45034	0.38571	2.65192	1.72285	1.15916	2.61265	0.527055	1.07097	0.869318	1.54632	0.631867	1.09636	0.0995103	0.179343	0.0827867	0.543305	0.238965	0.256102	0.548003	0.0468183	0.287063
	1.04857	1.46861	0.377679	1.29996	2.35426	1.18427	1.40141	2.1558	3.45034	0.38571	2.65192	1.72285	1.15916	2.61265	0.527055	1.07097	0.869318	1.54632	0.631867	1.09636	0.0995103	0.179343	0.0827867	0.543305	0.238965	0.256102	0.548003	0.0468183	0.287063	0.742772	1.37206	0.353235	0.744493	1.79063	1.29564	1.35344	1.82062	0.89075	1.36025	1.17826	1.38773	1.29341	2.88921	2.19959	2.0488	1.70947	2.86247	1.23987	1.6468
	1.18427	1.40141	2.1558	3.45034	0.38571	2.65192	1.72285	1.15916	2.61265	0.527055	1.07097	0.869318	1.54632	0.631867	1.09636	0.0995103	0.179343	0.0827867	0.543305	0.238965	0.256102	0.548003	0.0468183	0.287063	0.742772	1.37206	0.353235	0.744493	1.79063	1.29564	1.35344	1.82062	0.89075	1.36025	1.17826	1.38773	1.29341	2.88921	2.19959	2.0488	1.70947	2.86247	1.23987	1.6468	1.41056	1.42964	0.888802	0.645727	3.79338
	1.09636	0.0995103	0.179343	0.0827867	0.543305	0.238965	0.256102	0.548003	0.0468183	0.287063	0.742772	1.37206	0.353235	0.744493	1.79063	1.29564	1.35344	1.82062	0.89075	1.36025	1.17826	1.38773	1.29341	2.88921	2.19959	2.0488	1.70947	2.86247	1.23987	1.6468	1.41056	1.42964	0.888802	0.645727	3.79338	3.05711	0.987029	1.07395	0.603546	0.836045	0.714672	0.25109	0.485964	0.949966	0.159898	0.757799	1.88507	2.81509	0.413125
	0.742772	1.37206	0.353235	0.744493	1.79063	1.29564	1.35344	1.82062	0.89075	1.36025	1.17826	1.38773	1.29341	2.88921	2.19959	2.0488	1.70947	2.86247	1.23987	1.6468	1.41056	1.42964	0.888802	0.645727	3.79338	3.05711	0.987029	1.07395	0.603546	0.836045	0.714672	0.25109	0.485964	0.949966	0.159898	0.757799	1.88507	2.81509	0.413125	0.135385	0.474697	-0.765506	-2.12704	-1.71528	-1.43175	-0.319251	-2.0649	-1.14702	-1.42557
	1.34415	1.94712	0.61476	1.78864	2.17438	1.11147	0.902488	0.202399	1.40831	1.52512	2.86413	1.71088	1.67829	0.526131	1.38711	2.2348	2.58126	1.1796	0.216752	1.06508	1.2103	1.98979	1.0851	0.355381	0.572684	1.1398	0.997541	1.38079	1.06682	0.98861	1.4701	1.82126	2.92622	1.71169	0.765887	0.986129	0.379285	1.66401	1.57968	2.14581	0.671972	0.274487	0.699317	1.40702	2.71224	2.96099	1.06412	0.450677	0.75584
	1.40831	1.52512	2.86413	1.71088	1.67829	0.526131	1.38711	2.2348	2.58126	1.1796	0.216752	1.06508	1.2103	1.98979	1.0851	0.355381	0.572684	1.1398	0.997541	1.38079	1.06682	0.98861	1.4701	1.82126	2.92622	1.71169	0.765887	0.986129	0.379285	1.66401	1.57968	2.14581	0.671972	0.274487	0.699317	1.40702	2.71224	2.96099	1.06412	0.450677	0.75584	0.296334	0.0953353	0.39446	0.687079	0.956636	1.07165	1.5047	1.65538
	2.58126	1.1796	0.216752	1.06508	1.2103	1.98979	1.0851	0.355381	0.572684	1.1398	0.997541	1.38079	1.06682	0.98861	1.4701	1.82126	2.92622	1.71169	0.765887	0.986129	0.379285	1.66401	1.57968	2.14581	0.671972	0.274487	0.699317	1.40702	2.71224	2.96099	1.06412	0.450677	0.75584	0.296334	0.0953353	0.39446	0.687079	0.956636	1.07165	1.5047	1.65538	0.694256	0.0978584	0.414184	0.899009	0.903792	0.528147	0.408027	0.0862753
	0.355381	0.572684	1.1398	0.997541	1.38079	1.06682	0.98861	1.4701	1.82126	2.92622	1.71169	0.765887	0.986129	0.379285	1.66401	1.57968	2.14581	0.671972	0.274487	0.699317	1.40702	2.71224	2.96099	1.06412	0.450677	0.75584	0.296334	0.0953353	0.39446	0.687079	0.956636	1.07165	1.5047	1.65538	0.694256	0.0978584	0.414184	0.899009	0.903792	0.528147	0.408027	0.0862753	0.328734	0.553862	0.354059	0.923099	0.359335	-0.33052	-0.22601
	0.98861	1.4701	1.82126	2.92622	1.71169	0.765887	0.986129	0.379285	1.66401	1.57968	2.14581	0.671972	0.274487	0.699317	1.40702	2.71224	2.96099	1.06412	0.450677	0.75584	0.296334	0.0953353	0.39446	0.687079	0.956636	1.07165	1.5047	1.65538	0.694256	0.0978584	0.414184	0.899009	0.903792	0.528147	0.408027	0.0862753	0.328734	0.553862	0.354059	0.923099	0.359335	-0.33052	-0.22601	-1.00342	-1.16155	-0.0525362	-0.435123	-0.278982	-0.208681
	-0.621302	-0.406289	-0.800623	-0.728288	-0.175606	-0.792171	-2.25715	-1.49744	-1.8596	1.36986	0.932887	1.44758	2.28139	1.69714	1.08449	1.35393	0.815972	2.21076	2.30295	2.59736	1.03733	0.83043	2.59404	3.61365	1.84992	0.844204	1.67739	2.03355	0.558946	1.27261	2.45051	1.42352	2.62653	0.79965	0.154251	0.0621774	1.47271	0.477822	0.36282	0.667323	0.120838	-0.110196	-0.792153	-0.749117	-0.742881	-0.652498	-1.83975	-2.81505	-3.05919
	0.447287	0.720925	1.08199	1.08374	1.61572	0.944148	2.68541	0.997147	1.91372	1.26981	0.629857	0.406187	0.463487	1.13473	1.7326	1.59483	2.3861	2.65702	1.52463	0.930338	0.527933	0.118563	0.286401	0.442797	0.316504	0.258546	-0.405006	-0.336715	-0.708066	-0.260102	-0.258378	-1.81103	3.81955	1.62768	1.07391	2.54157	3.37264	2.63726	1.19047	0.862876	1.39645	0.904193	0.0856627	0.183884	0.316661	0.134514	0.489991	0.0790215	1.05856
	1.13473	1.7326	1.59483	2.3861	2.65702	1.52463	0.930338	0.527933	0.118563	0.286401	0.442797	0.316504	0.258546	-0.405006	-0.336715	-0.708066	-0.260102	-0.258378	-1.81103	3.81955	1.62768	1.07391	2.54157	3.37264	2.63726	1.19047	0.862876	1.39645	0.904193	0.0856627	0.183884	0.316661	0.134514	0.489991	0.0790215	1.05856	1.18229	0.850294	1.46938	1.28447	2.92889	1.68758	1.61656	1.90922	1.03757	1.82559	0.683975	-1.56099	-1.89553
	-0.984787	-0.269591	-0.717958	-0.471424	-1.01568	0.189937	2.53548	2.25751	0.551459	1.8805	2.35391	0.554788	0.245658	0.105863	0.465865	0.299224	2.06712	1.16322	0.993605	1.14676	0.848991	0.314064	0.453807	0.767051	0.789653	3.25442	2.11818	1.48948	0.571837	1.99937	1.63601	2.71937	1.69469	0.926133	0.953991	1.55407	2.46404	1.76383	0.954549	0.978826	2.31963	1.42785	0.972056	0.743098	1.11361	1.6229	1.55753	1.69653	2.38668
	0.571837	1.99937	1.63601	2.71937	1.69469	0.926133	0.953991	1.55407	2.46404	1.76383	0.954549	0.978826	2.31963	1.42785	0.972056	0.743098	1.11361	1.6229	1.55753	1.69653	2.38668	0.424056	1.12356	1.57132	1.84556	0.785114	1.57892	1.53724	2.59579	2.79776	1.30408	1.25981	1.99046	1.4925	1.58089	2.25918	1.33144	1.7896	1.55716	1.79867	1.69393	2.105	1.83287	3.1759	1.43306	2.57976	2.62737	1.67305	1.40007
	1.57132	1.84556	0.785114	1.57892	1.53724	2.59579	2.79776	1.30408	1.25981	1.99046	1.4925	1.58089	2.25918	1.33144	1.7896	1.55716	1.79867	1.69393	2.105	1.83287	3.1759	1.43306	2.57976	2.62737	1.67305	1.40007	1.83165	2.01413	1.96461	1.72962	2.08101	1.81385	2.16902	0.825549	0.873908	2.81062	0.515087	0.490123	1.0648	2.56615	1.64119	2.90992	1.91503	1.26725	1.33674	2.25204	0.529269	1.89059	3.06968
	2.29102	1.80434	2.14689	1.67846	1.06701	2.29892	3.14828	1.4937	1.43524	0.801389	1.19325	1.50428	3.17803	1.34054	2.56488	1.99097	1.51988	3.01409	1.41313	1.07629	1.50003	2.12545	0.820094	2.26171	0.736147	0.721009	2.18386	3.14401	1.54635	1.82791	1.07759	0.283706	3.1992	3.37612	2.13376	2.0907	0.513192	1.79647	1.72268	1.07242	1.65661	-2.52635	-1.65218	-2.7404	-1.68154	-1.05391	-0.454313	-2.0421	-1.54398
	1.39789	0.890509	2.99871	2.39046	0.957683	1.23602	1.42557	0.430443	1.57288	3.84286	1.3882	0.755761	1.53262	1.03846	1.91698	3.41947	2.11434	0.648998	1.98538	1.69846	3.32803	1.96185	0.722124	0.842989	0.827594	1.42334	1.83384	2.55747	0.9306	0.950434	0.599825	1.36877	2.51486	1.53995	1.08757	0.8229	1.6654	0.449116	1.03771	1.91612	0.126031	0.535317	0.355674	1.00942	1.66872	1.87684	2.04323	1.35289	0.110679
	2.55747	0.9306	0.950434	0.599825	1.36877	2.51486	1.53995	1.08757	0.8229	1.6654	0.449116	1.03771	1.91612	0.126031	0.535317	0.355674	1.00942	1.66872	1.87684	2.04323	1.35289	0.110679	0.891726	2.12257	1.41701	1.88648	3.0153	1.71512	1.64073	2.26038	2.01609	2.73735	2.97573	1.06929	0.939527	1.33727	2.92565	1.28666	1.81689	2.73948	2.50781	0.210914	2.4647	1.46598	1.76005	1.09934	1.02297	3.61359	1.32991
	1.91612	0.126031	0.535317	0.355674	1.00942	1.66872	1.87684	2.04323	1.35289	0.110679	0.891726	2.12257	1.41701	1.88648	3.0153	1.71512	1.64073	2.26038	2.01609	2.73735	2.97573	1.06929	0.939527	1.33727	2.92565	1.28666	1.81689	2.73948	2.50781	0.210914	2.4647	1.46598	1.76005	1.09934	1.02297	3.61359	1.32991	0.601596	1.01826	1.606	2.16107	-0.073267	-0.264113	-0.493436	-1.04765	-1.5266	-1.10002	-0.143409	-0.171079
	1.86038	1.27037	1.42154	2.38669	2.55338	1.80018	2.99527	-0.994786	-0.918802	-1.77199	-0.129261	-0.438998	-0.331919	-0.901974	-0.385962	-2.36031	-2.65316	-1.55082	-2.08601	-1.62972	-2.45109	-3.00797	-1.38249	-0.370558	-0.685526	-0.175797	-0.256416	-0.581204	-0.767074	-0.433085	1.18089	0.845004	0.55134	1.40383	1.8919	1.73925	1.61208	0.456167	0.640049	2.34251	2.28116	-1.24296	-0.0879926	-0.835307	-0.263577	-0.360478	-0.427175	-0.111294	-0.284453
	-0.385962	-2.36031	-2.65316	-1.55082	-2.08601	-1.62972	-2.45109	-3.00797	-1.38249	-0.370558	-0.685526	-0.175797	-0.256416	-0.581204	-0.767074	-0.433085	1.18089	0.845004	0.55134	1.40383	1.8919	1.73925	1.61208	0.456167	0.640049	2.34251	2.28116	-1.24296	-0.0879926	-0.835307	-0.263577	-0.360478	-0.427175	-0.111294	-0.284453	-1.12287	2.38687	2.01951	1.32237	1.48563	2.30117	4.09352	1.33101	1.41637	1.83027	1.24933	2.10244	0.458101	0.385245
	1.32237	1.48563	2.30117	4.09352	1.33101	1.41637	1.83027	1.24933	2.10244	0.458101	0.385245	1.87269	1.91323	1.53231	2.01459	1.8355	1.71734	1.91565	0.9411	2.85565	2.46596	1.92804	1.72409	0.840587	3.12328	2.2149	2.16345	1.58552	2.71523	1.97773	2.2777	2.06104	3.01801	2.29982	2.23802	1.71394	2.00027	3.90444	1.74888	0.584293	1.86005	1.83692	3.04663	2.35017	1.11412	1.70928	1.74232	1.6521	2.15913
	-0.391209	-0.574615	-0.965518	-1.54912	-1.41937	-0.193283	-2.20855	-2.32294	-1.3998	-0.111202	-0.29898	-1.25518	-1.25094	-3.85144	-3.06585	-1.65304	-0.931454	-0.633711	-0.116468	-0.237234	-0.535202	-0.689662	-1.29163	-1.10625	-2.06762	-1.59887	2.24713	1.32619	4.29095	1.85549	0.715441	0.985305	1.77726	1.72083	4.12597	1.53176	3.0756	1.29748	1.16261	1.83714	2.30932	1.30901	1.30216	2.15925	1.69253	1.89238	1.6926	-1.91532	-4.02898
	-0.543656	-0.851521	-2.35175	-3.34375	-3.22976	-2.49539	-2.28199	-0.587683	-1.6359	-1.2238	-0.787494	-0.345423	-0.142802	-0.108819	-0.477122	-0.208084	-0.350642	-1.68301	-0.476008	0.657387	1.89449	4.33174	1.87032	0.998672	1.17518	1.94635	2.67016	1.29426	1.50935	1.88323	2.3942	2.82834	1.28905	2.8033	1.51706	1.40562	0.418361	4.24945	2.87778	2.52069	1.72829	0.0785654	2.19419	2.62641	1.85385	1.76989	2.27815	1.75088	2.3161
	1.17518	1.94635	2.67016	1.29426	1.50935	1.88323	2.3942	2.82834	1.28905	2.8033	1.51706	1.40562	0.418361	4.24945	2.87778	2.52069	1.72829	0.0785654	2.19419	2.62641	1.85385	1.76989	2.27815	1.75088	2.3161	1.61138	1.05615	1.32738	1.65291	1.70985	0.615397	1.87042	1.40148	1.74623	2.75095	1.88646	1.55475	0.595909	0.800277	0.862093	0.738752	-0.130973	-1.00259	-0.640744	-0.581504	-0.443721	-1.04602	-0.405476	-0.0784286
	2.55722	3.126	2.19378	2.27719	0.986114	3.77774	1.89826	1.5825	2.5804	0.572193	0.973103	1.3746	2.15721	2.40339	1.848	2.05404	1.62435	2.36926	1.91916	0.87577	1.65192	1.51885	2.61185	2.83283	2.16769	1.4403	2.57228	2.29515	1.16519	1.6192	1.53276	2.08399	2.9026	2.23836	2.24304	1.04278	2.01304	2.22066	1.44794	2.50701	2.13236	0.291717	3.2166	1.45897	1.59129	2.939	1.63722	1.37423	1.95373
	2.22066	1.44794	2.50701	2.13236	0.291717	3.2166	1.45897	1.59129	2.939	1.63722	1.37423	1.95373	1.10934	1.33417	0.890102	1.77732	2.16084	3.60654	1.78898	1.11505	2.65338	3.62658	2.12196	1.664	1.09512	3.24694	2.04528	1.53029	1.43912	0.722086	0.65846	0.588082	2.95697	2.4549	1.7632	1.04207	0.356342	1.70547	2.41712	2.10693	0.42579	-1.10728	-0.829222	-0.387316	-1.27651	-0.615927	-0.830596	-0.560803	-0.890501
	-1.4935	-1.57544	-1.66797	-2.64975	-2.13568	-2.60406	-1.20576	-0.230813	-0.33371	-0.0556774	-0.285655	-0.879228	-0.107829	-0.490425	-0.138777	-0.161408	-0.121718	-0.730658	-0.294901	2.56986	2.57873	2.2581	1.66707	2.20111	1.53216	3.09169	1.3381	1.97369	2.86715	1.34886	2.24605	2.19503	1.26429	2.8036	2.1909	2.89553	1.82297	0.725008	2.18523	2.55943	2.34938	0.332236	0.439943	0.513281	1.47737	2.03282	2.94505	0.720686	1.46943
	-0.0556774	-0.285655	-0.879228	-0.107829	-0.490425	-0.138777	-0.161408	-0.121718	-0.730658	-0.294901	2.56986	2.57873	2.2581	1.66707	2.20111	1.53216	3.09169	1.3381	1.97369	2.86715	1.34886	2.24605	2.19503	1.26429	2.8036	2.1909	2.89553	1.82297	0.725008	2.18523	2.55943	2.34938	0.332236	0.439943	0.513281	1.47737	2.03282	2.94505	0.720686	1.46943	1.24864	-2.22013	-0.694023	-0.38223	-0.594911	-2.19487	-1.38445	-0.535447	-1.72051
	1.41592	1.43317	1.83985	2.28344	1.55247	1.35067	0.356794	0.782773	1.52275	3.13786	2.50449	0.780011	-0.504147	-0.0985907	-1.68499	-3.55434	-0.180599	-1.60941	-2.23079	-3.06358	-2.04409	-1.67818	-1.60326	-0.244815	-1.07686	-2.96779	-1.9238	-1.43663	-0.652461	-0.930925	-0.186687	-0.376573	-1.05426	-0.084497	-1.40242	1.85336	1.85152	1.61223	2.01595	1.29761	3.32328	2.85008	1.60601	2.14394	0.900269	3.71349	2.02365	1.42301	2.37666
	-2.96779	-1.9238	-1.43663	-0.652461	-0.930925	-0.186687	-0.376573	-1.05426	-0.084497	-1.40242	1.85336	1.85152	1.61223	2.01595	1.29761	3.32328	2.85008	1.60601	2.14394	0.900269	3.71349	2.02365	1.42301	2.37666	1.08891	2.32539	2.33133	1.01222	0.587164	1.36113	1.03532	1.15365	0.392657	0.86892	1.86754	1.34109	1.91219	1.88345	1.14665	1.70363	2.47485	2.16159	1.64172	1.39209	2.36557	1.33601	1.56829	3.88499	1.86563
	2.36557	1.33601	1.56829	3.88499	1.86563	1.4741	2.11506	3.37317	2.04452	1.14174	0.70629	1.15843	0.922728	1.21249	1.41774	3.16035	2.92014	1.34249	0.900875	1.26968	1.62389	2.45813	1.09096	0.384724	2.08388	3.77882	2.59946	0.869745	0.755896	0.818846	1.33816	0.332379	1.73486	2.31075	1.21314	0.528078	0.362317	0.277974	0.997493	1.99017	1.41587	-0.561915	-0.30387	-0.25618	-1.11675	-1.0698	-0.111855	-0.358718	-0.122579
	1.99604	2.87495	2.57532	0.794589	1.15443	0.90584	2.3071	1.89593	2.25426	0.987257	-0.225744	-0.675292	-1.84894	-0.709502	-0.192678	-0.806054	-2.48896	-1.38113	-0.139957	-0.0877021	-0.93265	-0.554478	-0.32166	-0.433099	-1.76925	-1.93815	-1.62942	-0.48712	1.69861	4.00081	2.81006	1.72385	1.30591	1.50109	2.02713	2.86504	1.81601	0.880262	1.4525	2.82768	2.7372	2.34894	1.45935	1.58002	1.46256	1.01923	2.30527	2.16114	1.15566
	-0.33991	-2.51186	-1.90478	-2.64775	-2.28834	-2.02153	-1.81714	-2.16111	-2.79346	-1.00989	-0.769062	-0.731587	-1.16193	-1.07927	-1.66455	-0.173363	-0.749827	-0.470578	-0.393413	-0.41247	-0.217515	-0.452085	-1.68878	-1.19214	-1.13341	-2.70783	0.233622	2.50119	2.4579	2.58134	2.13505	0.920876	2.75552	1.22855	3.09396	2.44625	0.380741	2.22617	1.98288	2.33749	1.29748	0.303639	1.55436	1.28536	2.45134	3.12535	0.721325	0.931709	1.3197
	-0.731587	-1.16193	-1.07927	-1.66455	-0.173363	-0.749827	-0.470578	-0.393413	-0.41247	-0.217515	-0.452085	-1.68878	-1.19214	-1.13341	-2.70783	0.233622	2.50119	2.4579	2.58134	2.13505	0.920876	2.75552	1.22855	3.09396	2.44625	0.380741	2.22617	1.98288	2.33749	1.29748	0.303639	1.55436	1.28536	2.45134	3.12535	0.721325	0.931709	1.3197	0.856178	0.733357	0.594282	-0.897297	-2.087	-0.581271	-0.904611	-0.781482	-0.813798	-0.931954	-0.671565
	-0.81342	-0.427945	-1.63503	-1.28301	-0.547856	-3.50355	2.18307	1.53613	0.885707	1.2481	1.97806	0.957654	2.38854	1.87208	0.50331	0.802459	1.50287	0.758182	1.46416	2.50607	0.514472	1.88824	2.52324	0.398048	2.97558	1.57763	1.94147	1.95777	1.23465	1.69768	1.87888	1.2877	2.62148	1.38324	1.82202	1.44897	0.699785	2.02526	1.36855	1.3173	3.42078	0.202384	4.04823	1.12538	2.17922	2.50729	2.52288	1.3016	1.47893
	1.87208	0.50331	0.802459	1.50287	0.758182	1.46416	2.50607	0.514472	1.88824	2.52324	0.398048	2.97558	1.57763	1.94147	1.95777	1.23465	1.69768	1.87888	1.2877	2.62148	1.38324	1.82202	1.44897	0.699785	2.02526	1.36855	1.3173	3.42078	0.202384	4.04823	1.12538	2.17922	2.50729	2.52288	1.3016	1.47893	1.74482	2.12511	1.44968	2.91899	2.27168	0.323794	1.31815	1.74037	1.654	1.419	2.18947	1.88591	0.764956
	1.57763	1.94147	1.95777	1.23465	1.69768	1.87888	1.2877	2.62148	1.38324	1.82202	1.44897	0.699785	2.02526	1.36855	1.3173	3.42078	0.202384	4.04823	1.12538	2.17922	2.50729	2.52288	1.3016	1.47893	1.74482	2.12511	1.44968	2.91899	2.27168	0.323794	1.31815	1.74037	1.654	1.419	2.18947	1.88591	0.764956	1.23422	2.71048	0.744424	1.42779	-1.14611	-0.719834	-0.926332	-0.629083	-0.822332	-2.64108	-1.58842	-1.59083
	-1.84004	-0.97429	-1.11886	-1.38275	-1.18268	-0.961926	-1.34301	-0.196088	-0.273064	-0.266529	-0.274035	-1.85028	-1.33883	-0.998506	-0.223158	-1.40974	-3.34697	2.90141	1.50262	1.00817	1.08236	1.13147	1.96441	1.7038	1.14845	2.9711	2.08155	2.23209	1.42051	2.17747	3.22015	1.67547	1.6629	1.94792	2.67451	2.2027	1.53237	0.693382	1.42209	2.98785	1.51778	3.26658	1.3393	1.4052	1.7117	1.14564	0.886378	2.09198	1.30004
	-0.867938	-0.557137	-0.723451	-0.293236	-0.532094	-0.292985	-0.850833	-1.09395	-1.3732	-1.75216	1.55949	0.763525	1.06602	2.31023	0.964309	3.34658	1.4482	1.17645	1.93388	1.14907	0.856543	2.32293	1.84393	1.33264	1.95324	1.34787	3.18489	2.09328	1.40953	1.22473	1.31118	1.20997	2.05689	1.31026	3.14462	1.39688	0.238207	3.55819	2.82284	1.5987	1.72523	0.0940097	2.88536	2.09081	1.49608	1.2352	1.42408	0.719947	2.03267
	1.31118	1.20997	2.05689	1.31026	3.14462	1.39688	0.238207	3.55819	2.82284	1.5987	1.72523	0.0940097	2.88536	2.09081	1.49608	1.2352	1.42408	0.719947	2.03267	2.15291	2.73843	1.33301	1.43217	2.62285	2.59906	1.0903	2.17402	1.52401	1.56223	0.521871	1.46547	2.3504	2.59375	0.942268	1.02051	0.486085	0.622409	0.931387	0.49817	1.49499	1.37138	1.50001	0.899242	0.963443	1.85994	2.94386	1.11529	0.701393	1.97744
	2.09081	1.49608	1.2352	1.42408	0.719947	2.03267	2.15291	2.73843	1.33301	1.43217	2.62285	2.59906	1.0903	2.17402	1.52401	1.56223	0.521871	1.46547	2.3504	2.59375	0.942268	1.02051	0.486085	0.622409	0.931387	0.49817	1.49499	1.37138	1.50001	0.899242	0.963443	1.85994	2.94386	1.11529	0.701393	1.97744	3.9029	0.85769	1.09924	0.499647	2.41284	1.79745	0.828052	1.1161	0.76461	1.78173	1.10586	1.1156	0.883808
	0.963443	1.85994	2.94386	1.11529	0.701393	1.97744	3.9029	0.85769	1.09924	0.499647	2.41284	1.79745	0.828052	1.1161	0.76461	1.78173	1.10586	1.1156	0.883808	1.45793	0.923806	1.9565	1.88708	0.671818	0.636785	0.213389	0.460839	0.720481	0.223527	0.323542	1.87888	1.79504	1.30903	1.85845	3.82342	0.725986	2.02066	2.21303	2.05632	0.937833	1.21123	-2.28577	-3.77282	-0.0984777	-0.316735	-0.12097	-2.18714	-1.14061	-3.56253
	-1.65419	-2.43238	1.73183	2.16871	1.96167	0.574943	3.07662	2.32193	2.16411	3.1243	0.566489	2.41076	2.247	3.40576	2.66647	0.666935	2.44453	1.27659	3.86455	0.930815	1.29681	2.76698	1.85183	2.42799	1.10337	2.13966	2.11992	1.69007	1.8306	1.30778	1.36767	1.25845	1.04262	1.5141	1.89837	1.38798	1.44223	1.51237	1.91865	0.783623	0.932198	0.187376	-1.4594	-1.51082	-0.876359	-0.853657	-0.964341	-0.90107	-1.0039
	0.567174	2.83265	1.87922	1.45351	1.89774	-1.35597	-0.785562	-1.60588	-0.265624	-1.764	-1.95241	-1.31351	-2.63669	-2.86232	-1.71956	-2.63194	-1.71732	-3.0445	-1.40851	-0.469908	-0.684362	-0.72748	-0.276185	-1.02882	-1.28926	-1.11798	-2.65781	-1.57777	4.37097	0.807011	2.37322	1.42681	1.86531	0.514788	1.66703	2.38334	1.4297	0.962721	2.21841	1.66695	2.4898	3.29256	2.00122	1.48404	3.08649	0.911918	2.56682	3.52778	1.75393
	2.5464	0.771025	2.55105	0.714524	2.21248	2.26445	2.37402	2.45259	1.33009	2.10076	2.60062	2.08422	1.32593	1.34932	1.18183	2.47421	1.89816	1.27573	2.8887	1.33218	1.95633	0.168475	0.147388	1.77434	0.908823	1.62665	0.611142	1.42776	0.616606	2.13757	1.00675	1.06166	0.941846	1.18259	1.18926	1.90461	0.398965	0.360829	0.612786	2.08184	2.22367	2.2915	1.01975	1.20161	2.60643	1.18433	1.72102	1.67791	1.9025
	0.5301	2.01015	1.98314	3.51533	1.46268	1.53602	2.01881	2.3694	2.49432	2.24226	1.66038	1.43065	2.15272	1.18632	3.2352	0.980737	0.841884	1.71046	1.83316	-1.59148	-1.17513	-1.5568	-1.10378	-2.70887	-0.42105	-1.45516	-3.02788	-2.96013	-1.47106	-0.307781	-0.491506	-0.738351	-0.565373	-1.21939	-1.44017	-0.828198	-2.30494	1.51784	3.20169	0.779251	2.27215	1.34705	1.80924	2.74078	1.90914	1.76227	1.30733	3.87793	3.3794
	-0.42105	-1.45516	-3.02788	-2.96013	-1.47106	-0.307781	-0.491506	-0.738351	-0.565373	-1.21939	-1.44017	-0.828198	-2.30494	1.51784	3.20169	0.779251	2.27215	1.34705	1.80924	2.74078	1.90914	1.76227	1.30733	3.87793	3.3794	1.13839	2.44841	1.97973	2.56679	1.99569	1.00039	1.75685	1.36955	1.80805	2.48695	0.826497	0.552834	1.51723	2.27983	2.17595	1.57614	2.25869	2.66801	2.59413	2.44613	2.11036	1.82952	1.93048	2.21043
	-0.142418	-1.30394	-2.18723	-1.88147	-2.51748	-2.88932	-1.91037	-1.67677	-2.04	-2.0048	-0.286275	-0.743604	-0.907814	-0.545734	-0.282474	-1.81018	-1.26199	4.16222	1.72055	1.19379	2.54593	2.45884	1.84639	3.30304	2.09513	1.87643	2.41512	2.65712	1.1194	3.47274	3.13445	1.65546	1.73779	1.74308	1.93792	1.48971	3.16162	2.96285	1.29575	2.65219	2.53051	2.42595	1.8935	1.59914	1.93793	3.95906	2.87365	2.05648	1.32452
	1.73779	1.74308	1.93792	1.48971	3.16162	2.96285	1.29575	2.65219	2.53051	2.42595	1.8935	1.59914	1.93793	3.95906	2.87365	2.05648	1.32452	2.83337	-3.20344	-2.29869	-0.450782	-1.18199	-2.7486	-2.60353	-0.433172	-0.4094	-0.601518	-0.441607	-0.266727	-0.119045	-0.116055	-1.02943	-2.14363	3.47672	1.54962	0.0516373	1.23539	3.0558	2.96432	2.34844	0.709467	0.706457	1.4263	1.3991	0.938416	3.60481	1.61842	0.321755	0.560749
	1.29575	2.65219	2.53051	2.42595	1.8935	1.59914	1.93793	3.95906	2.87365	2.05648	1.32452	2.83337	-3.20344	-2.29869	-0.450782	-1.18199	-2.7486	-2.60353	-0.433172	-0.4094	-0.601518	-0.441607	-0.266727	-0.119045	-0.116055	-1.02943	-2.14363	3.47672	1.54962	0.0516373	1.23539	3.0558	2.96432	2.34844	0.709467	0.706457	1.4263	1.3991	0.938416	3.60481	1.61842	0.321755	0.560749	2.04323	0.429191	0.15305	1.3139	1.56308	1.60227
	1.59914	1.93793	3.95906	2.87365	2.05648	1.32452	2.83337	-3.20344	-2.29869	-0.450782	-1.18199	-2.7486	-2.60353	-0.433172	-0.4094	-0.601518	-0.441607	-0.266727	-0.119045	-0.116055	-1.02943	-2.14363	3.47672	1.54962	0.0516373	1.23539	3.0558	2.96432	2.34844	0.709467	0.706457	1.4263	1.3991	0.938416	3.60481	1.61842	0.321755	0.560749	2.04323	0.429191	0.15305	1.3139	1.56308	1.60227	0.424954	0.234141	0.669673	0.538223	1.08495
	-0.450782	-1.18199	-2.7486	-2.60353	-0.433172	-0.4094	-0.601518	-0.441607	-0.266727	-0.119045	-0.116055	-1.02943	-2.14363	3.47672	1.54962	0.0516373	1.23539	3.0558	2.96432	2.34844	0.709467	0.706457	1.4263	1.3991	0.938416	3.60481	1.61842	0.321755	0.560749	2.04323	0.429191	0.15305	1.3139	1.56308	1.60227	0.424954	0.234141	0.669673	0.538223	1.08495	1.3669	0.754744	0.424824	1.10659	0.681887	1.17292	0.613413	1.26518	1.41238
	-0.601518	-0.441607	-0.266727	-0.119045	-0.116055	-1.02943	-2.14363	3.47672	1.54962	0.0516373	1.23539	3.0558	2.96432	2.34844	0.709467	0.706457	1.4263	1.3991	0.938416	3.60481	1.61842	0.321755	0.560749	2.04323	0.429191	0.15305	1.3139	1.56308	1.60227	0.424954	0.234141	0.669673	0.538223	1.08495	1.3669	0.754744	0.424824	1.10659	0.681887	1.17292	0.613413	1.26518	1.41238	1.33472	2.87342	3.12993	0.585774	2.47842	1.6136
	0.956505	-0.423373	-2.24607	-3.53438	-1.62749	-0.880816	-0.281083	-0.180625	-0.349863	-0.233301	-0.760427	-0.0810845	-3.45622	-1.08449	-1.72013	-2.99323	-0.986768	-1.70806	-2.3825	-1.50986	-0.243241	-0.996829	-0.431555	-0.753	-0.266226	-0.630701	-1.12016	-0.820627	1.82246	3.84218	1.01636	2.62079	2.69816	2.42594	1.83176	2.69305	2.7273	1.49427	1.96538	2.56705	3.88076	2.09398	-2.3532	-2.60921	-0.949712	-1.41133	-2.62099	-2.77904	-1.07651
	3.88076	2.09398	-2.3532	-2.60921	-0.949712	-1.41133	-2.62099	-2.77904	-1.07651	-1.49766	-0.78386	-1.4497	-2.22875	-4.37191	-2.44963	-0.902177	-2.87461	-5.34738	-1.50854	-2.58886	-0.483467	-0.175933	-1.66712	-0.699511	-2.52947	-0.897116	-0.66826	-1.03089	2.92064	2.80195	4.3353	2.4938	2.21144	1.84111	2.07639	2.3203	2.96058	2.75953	2.50299	2.49287	2.00268	2.54261	3.24986	3.5809	1.1608	1.01669	3.21214	3.08794	0.2929
	-1.45388	-0.938695	-0.123402	-0.941409	-4.991	-3.11185	-3.48137	-1.79451	-2.37379	-1.23571	-1.26843	-2.91051	-3.18317	-0.426256	-0.689933	-0.613566	-0.691422	-0.295029	-0.545722	-1.66706	4.18197	1.86119	1.64624	2.11239	3.41206	3.24135	1.35469	1.69517	2.81679	3.80266	2.21948	2.03863	1.46734	2.45769	1.51782	2.46696	2.33421	1.67362	2.12167	2.9903	3.31801	2.28127	3.00101	2.20085	1.52931	3.05032	2.4378	2.88723	1.9173
	3.29536	2.43994	2.08701	2.3579	3.33351	1.20505	1.90335	1.72511	-0.520079	-1.80766	-3.38547	-2.00617	-1.32295	-2.9606	-3.25753	-0.0509408	-0.625166	-2.27238	-1.47173	-2.01547	-3.38988	-2.07116	-2.84632	-1.65258	-0.624691	-0.7297	-0.821088	-0.358974	-0.211925	-0.708346	-0.906958	-2.48719	-1.817	-0.955102	-1.69089	2.18438	3.12472	2.71781	1.44688	1.84242	2.41449	2.86855	2.39106	2.10999	2.49431	1.1141	2.69759	1.63751	1.47229
	3.45831	2.56464	1.77921	1.49552	1.1355	4.23137	2.33411	0.725312	0.472556	1.95794	5.80085	-1.35385	-1.17502	-0.809002	-1.30365	-1.75826	-2.46252	-1.11258	-0.584964	-3.16593	-2.22793	-1.62632	-3.18404	-3.09691	-0.992961	-2.053	-3.19148	-0.354147	-0.906895	-0.205759	-0.746628	-0.454112	-0.621107	-3.1091	1.22578	2.99562	2.25792	1.65161	1.85461	2.56888	2.06789	2.56213	1.2908	0.98019	2.45523	1.90729	1.57865	2.25476	2.20504
	NaN	NaN	NaN	2.08939	6.17897	1.4016	3.51833	1.72714	3.18799	3.1618	2.87366	2.69275	1.38021	2.90573	2.41216	2.67599	2.76363	2.48657	1.76099	1.65395	3.32201	2.08946	1.32841	1.68153	2.80285	3.21947	2.54922	2.186	1.91376	3.8381	1.85375	1.82514	2.32291	2.17687	2.48177	2.2639	0.786562	1.04907	1.4802	1.57741	1.21073	1.56615	0.826346	0.671153	0.921606	-0.809883	-1.21761	-1.11095	-0.550997
	2.2639	0.786562	1.04907	1.4802	1.57741	1.21073	1.56615	0.826346	0.671153	0.921606	-0.809883	-1.21761	-1.11095	-0.550997	-0.340363	-0.885286	-1.8925	-2.93205	-2.25567	2.94072	1.83131	4.08698	3.03975	1.58521	2.25607	2.35425	4.02334	2.01813	2.11905	2.05834	1.73954	3.9261	3.4066	2.97615	1.17829	4.03432	2.87051	1.52124	2.58663	2.82911	3.40474	1.41135	1.339	1.92708	2.57818	2.32211	1.52521	2.37187	4.04699
	-0.809883	-1.21761	-1.11095	-0.550997	-0.340363	-0.885286	-1.8925	-2.93205	-2.25567	2.94072	1.83131	4.08698	3.03975	1.58521	2.25607	2.35425	4.02334	2.01813	2.11905	2.05834	1.73954	3.9261	3.4066	2.97615	1.17829	4.03432	2.87051	1.52124	2.58663	2.82911	3.40474	1.41135	1.339	1.92708	2.57818	2.32211	1.52521	2.37187	4.04699	2.4373	0.661969	0.531279	0.308666	-0.229924	-0.552284	-0.679708	-0.280239	-0.269345	-0.271216
	-0.229924	-0.552284	-0.679708	-0.280239	-0.269345	-0.271216	-0.317682	-0.0880972	-0.384657	-1.48403	-1.22718	-2.44	-1.64604	1.77301	1.12888	3.35097	3.04656	2.61412	1.99297	0.818128	3.29662	1.68986	2.85046	1.99364	1.89616	2.67795	2.82492	2.76323	2.78117	0.360852	1.14948	2.25498	2.35633	3.42787	2.12955	2.43698	1.93609	1.39131	3.53553	2.77034	1.22343	-0.495179	-1.69309	-0.594162	-1.3647	-0.674278	-3.37498	-2.15896	-3.6707
	-3.2167	-1.62517	-2.28911	-2.1424	-1.72127	-2.50994	-2.69496	-3.01532	-3.21043	-2.72193	-2.64479	-0.880684	-0.476725	-4.88851	-3.75036	-2.37697	-1.49594	-1.65618	-1.54042	-2.78849	-2.17359	-0.437704	-1.07151	-0.554289	-0.353705	-0.648731	-0.460521	-1.20637	-3.68375	2.41476	3.21747	1.86148	3.78873	3.90186	2.27983	2.3523	3.92263	1.24967	1.06533	1.88877	2.59136	2.91513	2.60749	1.88352	3.57113	3.53929	1.6197	1.51187	1.63051
	3.90186	2.27983	2.3523	3.92263	1.24967	1.06533	1.88877	2.59136	2.91513	2.60749	1.88352	3.57113	3.53929	1.6197	1.51187	1.63051	0.57572	1.53095	2.83756	2.90301	1.47963	2.42482	3.20224	2.31243	2.41201	3.31187	3.60252	3.47546	1.9656	3.61515	3.33759	1.7079	1.56651	1.71255	3.32451	1.27113	1.19366	1.01027	1.53066	1.84116	2.17446	-4.12658	-4.52616	-1.7594	-2.50909	-3.51114	-2.95566	-1.53492	-0.870641
	3.47546	1.9656	3.61515	3.33759	1.7079	1.56651	1.71255	3.32451	1.27113	1.19366	1.01027	1.53066	1.84116	2.17446	-4.12658	-4.52616	-1.7594	-2.50909	-3.51114	-2.95566	-1.53492	-0.870641	-0.432635	-1.68382	-1.90555	-1.43481	-0.318926	-1.82727	-1.24203	1.39961	1.51768	0.900483	0.559432	2.35516	2.65177	1.26538	0.307343	1.49244	0.760351	3.29517	2.67795	1.42719	2.09072	0.344931	1.61382	1.719	1.12077	2.44512	2.40303
	-0.318926	-1.82727	-1.24203	1.39961	1.51768	0.900483	0.559432	2.35516	2.65177	1.26538	0.307343	1.49244	0.760351	3.29517	2.67795	1.42719	2.09072	0.344931	1.61382	1.719	1.12077	2.44512	2.40303	2.72838	3.84835	2.19775	1.92369	3.3341	3.50346	1.8816	3.32032	1.14898	1.75327	2.44523	2.11861	1.99879	2.19528	3.47395	2.0966	0.876081	1.88148	0.793294	0.460179	1.3844	0.545478	0.223341	0.677079	3.11928	1.96055
	0.559432	2.35516	2.65177	1.26538	0.307343	1.49244	0.760351	3.29517	2.67795	1.42719	2.09072	0.344931	1.61382	1.719	1.12077	2.44512	2.40303	2.72838	3.84835	2.19775	1.92369	3.3341	3.50346	1.8816	3.32032	1.14898	1.75327	2.44523	2.11861	1.99879	2.19528	3.47395	2.0966	0.876081	1.88148	0.793294	0.460179	1.3844	0.545478	0.223341	0.677079	3.11928	1.96055	0.41036	2.35067	1.35053	3.19359	2.99328	2.48593
	1.33045	1.24155	2.16527	0.913238	1.39429	2.06167	4.45921	2.65975	1.90959	3.12068	1.09191	3.03858	2.96676	1.79753	1.55195	0.629336	-1.2061	-1.11619	-2.87181	-0.461386	-0.556548	-0.24708	-1.83191	-2.93212	3.42651	2.33879	2.85784	2.14983	3.08155	4.24978	2.51415	3.21321	1.35938	2.38644	2.13358	2.62027	2.59002	1.42951	2.36526	1.34942	1.82449	-0.733611	-2.55325	-2.0999	-2.03555	-0.246387	-0.457552	-0.36439	-0.951992
	4.24978	2.51415	3.21321	1.35938	2.38644	2.13358	2.62027	2.59002	1.42951	2.36526	1.34942	1.82449	-0.733611	-2.55325	-2.0999	-2.03555	-0.246387	-0.457552	-0.36439	-0.951992	-2.20506	-2.57269	-2.60641	-1.31431	-1.50387	-2.82384	-2.10351	-2.97415	-2.08212	-1.90534	-1.88331	-2.37154	-1.54464	-0.530252	-0.260718	2.02121	2.38805	1.5526	1.12578	0.805959	1.56786	2.90849	4.95123	1.43833	2.14336	3.25411	1.43196	1.40944	-1.51638
	-0.473293	-0.811504	-0.286116	-0.120711	-0.507092	-0.493763	-0.656871	-1.01654	-1.32166	3.47206	3.34449	1.85515	2.32026	0.994219	1.79318	2.5861	4.12668	0.570439	1.16675	1.77382	1.33879	2.13163	2.87123	2.60106	3.36993	0.82498	1.9051	1.46286	1.97892	1.52908	1.04954	2.30308	3.48474	2.20989	2.00579	1.42987	1.75006	1.17103	1.97326	2.15954	2.41963	2.73558	1.42741	1.91882	0.928064	1.62546	2.03904	2.05108	0.388281
	1.42741	1.91882	0.928064	1.62546	2.03904	2.05108	0.388281	2.77005	1.39858	1.96095	4.54846	1.86296	1.54885	3.55957	1.79781	3.07305	1.18627	2.67624	2.60821	2.48719	3.60878	1.72795	2.07407	2.08016	2.23561	2.80138	1.439	3.16373	2.25105	3.80803	0.988225	3.3641	3.15709	1.51048	2.81123	2.05338	2.46128	2.23469	0.666517	1.4043	1.55457	-2.47015	-4.34066	-1.0577	-2.78665	-3.51417	-1.17229	-2.35234	-3.03771
	-1.48215	-1.1827	-1.81364	-1.33753	0.62551	0.971144	1.31139	0.323458	0.794183	1.92047	1.16913	1.57815	2.39858	1.59307	2.54422	1.70504	3.90943	3.29287	1.26974	0.64209	0.90132	1.87031	2.02771	0.854858	0.918273	1.03872	0.788999	0.893842	0.775601	0.233861	2.30812	1.53583	2.17353	2.79105	0.590067	1.76491	3.90208	1.63378	2.42664	1.1932	1.06392	-2.78677	-2.32561	-0.9058	-1.03273	-0.362215	-0.838428	-0.885579	-1.14095
	3.89029	2.54791	0.614594	1.55879	2.73	4.84831	2.05266	1.9266	1.47725	0.962367	4.60293	2.17848	2.59408	1.7544	1.03394	2.14663	5.18	2.56701	1.68963	1.90237	2.92234	2.62774	0.67163	1.53422	2.80893	-1.47981	-1.72062	-2.89134	-2.17011	-1.07559	-2.98842	-0.802497	-1.89692	-1.03049	-1.56598	-1.31851	2.42927	0.921629	0.796584	0.973033	1.6047	0.191576	1.29156	0.639929	2.48481	2.20701	2.09492	1.55559	1.96472
	2.89304	0.882961	2.66408	2.48599	2.16176	2.55498	1.8685	2.65061	0.601914	2.88162	2.26421	2.51062	1.18215	0.603037	0.843405	1.15057	1.89958	1.80536	3.42189	2.53591	1.49056	1.49685	2.51008	2.61827	2.43009	1.59086	3.19305	3.65537	0.662867	1.21214	1.62877	1.0824	1.24431	2.18358	2.13812	2.6336	3.30236	2.41151	1.04557	1.64599	2.18779	2.83032	2.48704	0.69777	2.07636	-2.69418	-2.27652	-0.662495	-0.713672
	1.52311	0.940815	0.725114	1.87589	2.62427	1.7295	1.28785	0.979368	1.94428	3.01691	5.26294	1.46823	2.77517	2.62366	2.16262	2.6671	1.3209	1.90422	3.02061	2.5875	1.416	3.1512	1.02711	2.29453	3.15556	2.21959	1.13086	1.44785	2.36225	0.894807	4.34403	1.13868	0.255255	0.604269	0.677356	0.483161	2.08476	2.81317	1.18031	1.0575	1.07189	1.64356	2.53984	1.48042	1.94681	2.64205	1.20982	1.11662	3.19751
	3.57745	3.8372	1.88484	1.10149	1.15293	3.00905	1.59834	1.08315	3.88558	1.55182	2.31015	1.61472	2.0376	3.01105	1.97855	2.97193	4.21734	2.98876	1.15824	1.52202	2.20777	3.22481	1.83981	1.79091	1.65598	3.31714	2.51584	1.93863	2.22739	1.95782	1.50242	2.14275	0.784958	0.445031	2.08868	1.9944	1.55806	0.733232	2.32966	3.65787	1.65491	-1.89112	-3.1194	-2.14192	-2.03389	-0.766406	-1.24598	-1.41965	-1.03812
	3.61487	1.9001	2.69793	1.22539	3.03297	3.32858	4.29374	3.08604	2.20036	2.49367	3.61052	2.68715	2.87517	2.39577	3.58527	1.19145	-1.6327	-2.98503	-3.52522	-0.450179	-0.965417	-3.20077	-3.62651	-1.92831	-0.299884	-1.23583	-0.450756	-0.303093	-0.658361	-0.831832	-0.27181	-1.27623	-2.85505	-1.43895	-1.12173	-1.43485	2.36699	4.26127	3.08305	1.08023	1.9278	0.226981	3.15864	3.6857	1.18277	2.38627	2.22719	0.387938	3.01427
	1.18277	2.38627	2.22719	0.387938	3.01427	1.94158	0.73785	2.90693	-2.61464	-0.85529	-1.76112	-3.28976	-3.22249	-1.89998	-0.237584	-2.21574	-3.9192	-2.05338	-2.4781	-1.25998	-1.29902	-2.39941	-3.09176	-2.10797	-0.0888604	-0.481941	-0.757499	-0.786213	-0.444442	-0.557591	-0.966981	-1.60663	-2.10051	3.35901	2.11251	2.18879	3.45259	2.15635	3.1003	3.05022	4.20935	3.02118	2.9235	3.96384	1.1937	2.72709	1.94764	1.99905	2.97806
	2.67498	2.14387	5.95288	2.04931	2.28918	1.12306	3.65008	3.22325	1.7834	2.71402	3.61392	0.968261	-2.96266	-3.39073	-0.426167	-2.7793	-3.00574	-2.2041	-0.122407	-0.0548238	-0.464254	-1.57281	-4.41266	-3.23048	-1.44227	-1.58931	-0.377114	-0.953786	-0.412625	-0.622021	-0.295709	-0.515016	-1.13176	-1.75364	-2.11515	4.01911	3.40425	1.55775	2.16056	4.16787	4.23712	0.294893	0.749367	1.07771	0.609428	2.14988	2.90074	2.67954	1.70732
	-3.00574	-2.2041	-0.122407	-0.0548238	-0.464254	-1.57281	-4.41266	-3.23048	-1.44227	-1.58931	-0.377114	-0.953786	-0.412625	-0.622021	-0.295709	-0.515016	-1.13176	-1.75364	-2.11515	4.01911	3.40425	1.55775	2.16056	4.16787	4.23712	0.294893	0.749367	1.07771	0.609428	2.14988	2.90074	2.67954	1.70732	2.02595	2.31337	2.04726	3.8889	1.96807	1.50441	2.00021	2.86939	2.46549	-1.57266	-0.878083	-1.72845	-2.79812	-1.9267	-1.23667	-0.949393
	-1.75364	-2.11515	4.01911	3.40425	1.55775	2.16056	4.16787	4.23712	0.294893	0.749367	1.07771	0.609428	2.14988	2.90074	2.67954	1.70732	2.02595	2.31337	2.04726	3.8889	1.96807	1.50441	2.00021	2.86939	2.46549	-1.57266	-0.878083	-1.72845	-2.79812	-1.9267	-1.23667	-0.949393	-1.52304	1.34499	1.73815	3.35754	1.56282	2.55363	1.81064	2.28886	0.515726	0.0797204	0.509663	1.15073	3.83358	2.90295	1.55661	2.99104	3.75378
	2.07292	-2.51808	-4.35425	-1.53184	-0.21903	-3.60097	-1.06841	-0.854429	-3.45476	-3.63045	-2.08514	-3.2816	-4.73041	-0.88929	-0.022691	-1.93512	-0.988628	-4.06298	-3.26629	-2.1957	-2.50633	-3.10712	-2.4104	-1.40557	-1.18479	-0.275491	-0.959588	-0.524971	-0.674821	-0.576355	-0.911855	-3.16498	-2.2862	3.07051	1.13124	1.40742	2.842	2.88745	2.80163	1.20751	3.30459	3.25092	3.32824	2.02157	3.56769	2.28203	3.2469	2.72833	3.13224
	-0.600244	-0.528462	-0.48711	-1.47271	-1.3769	-3.36047	-2.98785	2.69798	3.82523	4.04293	2.80333	2.73472	3.53487	4.51674	2.58181	0.949426	2.16518	3.15717	2.81375	2.25685	2.75952	4.17637	3.63035	2.46732	2.39713	3.87891	3.43371	1.8237	1.46642	4.88894	4.8076	3.63009	1.80188	2.48502	3.9425	3.58451	1.51426	2.7157	3.90928	1.56724	0.220265	0.116189	0.0584289	2.71304	3.59222	2.8575	1.16108	2.09469	2.80138
	2.58181	0.949426	2.16518	3.15717	2.81375	2.25685	2.75952	4.17637	3.63035	2.46732	2.39713	3.87891	3.43371	1.8237	1.46642	4.88894	4.8076	3.63009	1.80188	2.48502	3.9425	3.58451	1.51426	2.7157	3.90928	1.56724	0.220265	0.116189	0.0584289	2.71304	3.59222	2.8575	1.16108	2.09469	2.80138	2.50285	2.26131	1.93539	2.18101	3.59573	3.5677	4.09776	3.38541	2.89141	2.54582	3.52475	2.22749	3.69023	4.11752
	3.6301	2.51816	2.7548	2.43678	2.51413	2.41285	3.19139	3.76814	3.71177	3.13002	0.597361	3.94708	3.85551	3.96506	2.05716	3.91367	4.17058	3.30416	1.12848	3.60699	-2.25948	-0.13589	-3.99776	-3.20723	-0.676478	-2.57543	-0.946377	-0.587464	-1.45088	-1.3606	1.62493	2.36108	3.58176	0.983585	4.22501	2.55394	0.934135	0.938213	2.36676	1.34785	2.26394	-3.27186	-0.747109	-2.54898	-2.71996	-2.39546	-1.30526	-0.992509	-0.814662
	-0.946377	-0.587464	-1.45088	-1.3606	1.62493	2.36108	3.58176	0.983585	4.22501	2.55394	0.934135	0.938213	2.36676	1.34785	2.26394	-3.27186	-0.747109	-2.54898	-2.71996	-2.39546	-1.30526	-0.992509	-0.814662	-0.627411	-2.14611	-2.54985	-2.86633	-3.5849	-2.61188	-3.80283	-1.39474	-2.91491	-1.60022	-0.83205	3.54299	2.48359	2.36096	1.9685	0.11398	0.0768137	0.142223	0.927742	1.97058	2.60734	3.12143	3.49675	3.56902	4.91957	1.69022
	1.44845	3.24378	2.45717	1.1372	1.50009	-2.20866	-3.032	-4.01916	-0.54225	-0.180449	-1.56033	-1.46244	-2.76244	-5.13612	-1.35113	-2.27669	-2.09558	-3.25939	-2.55337	-2.05995	-1.56757	-0.056635	-1.01125	-0.521489	-0.862777	-0.30858	-1.2192	-2.51731	-2.00512	3.34844	3.90338	1.9998	2.87358	3.84211	4.11259	2.23624	2.73649	3.37743	3.5017	1.90143	4.04348	3.66676	3.27088	1.18728	2.79954	5.42284	3.4555	1.28739	4.1922
	3.25849	1.41348	2.06043	3.22516	3.18241	2.08088	1.59003	1.78864	3.82205	1.07934	0.587829	2.07691	0.900024	1.23389	3.66512	-2.80159	-4.00933	-0.974888	-2.344	-1.40673	-0.433381	-1.16882	-1.8211	-1.29692	-0.242434	-1.9891	-1.74989	3.20275	2.45731	2.92533	3.76319	3.8931	2.08285	1.93831	5.60727	3.5755	2.14913	2.65857	3.52907	3.61858	3.16072	3.16802	1.65506	4.00935	3.33752	3.13436	2.39966	2.95543	2.56798
	-0.242434	-1.9891	-1.74989	3.20275	2.45731	2.92533	3.76319	3.8931	2.08285	1.93831	5.60727	3.5755	2.14913	2.65857	3.52907	3.61858	3.16072	3.16802	1.65506	4.00935	3.33752	3.13436	2.39966	2.95543	2.56798	3.71237	2.71252	2.63658	2.502	3.97494	3.82599	2.29674	2.8075	2.82682	3.94467	2.01378	3.97906	2.16536	2.55526	2.93784	2.37884	2.70646	3.28964	1.93198	1.42075	2.14059	2.47066	3.47141	3.06542
	3.5755	2.14913	2.65857	3.52907	3.61858	3.16072	3.16802	1.65506	4.00935	3.33752	3.13436	2.39966	2.95543	2.56798	3.71237	2.71252	2.63658	2.502	3.97494	3.82599	2.29674	2.8075	2.82682	3.94467	2.01378	3.97906	2.16536	2.55526	2.93784	2.37884	2.70646	3.28964	1.93198	1.42075	2.14059	2.47066	3.47141	3.06542	1.58554	0.350378	1.15284	1.00736	1.64715	2.21368	1.47793	3.64194	1.53699	2.03116	0.972119
	1.53699	2.03116	0.972119	0.819919	0.414031	1.48987	2.89774	3.29899	1.69673	3.13743	5.61613	1.88678	1.16641	2.45446	6.42898	2.22963	1.21852	1.15036	3.56063	3.98537	2.41761	2.25775	1.64321	2.7627	3.16554	4.65916	2.55159	2.44729	3.98704	3.76656	2.14426	2.72805	2.99595	3.351	2.31083	2.76619	2.51118	3.02077	2.56451	2.17137	3.63817	-1.21376	-2.63355	-1.49671	-0.960475	-3.55958	-0.830723	-0.824766	-2.15439
	3.98537	2.41761	2.25775	1.64321	2.7627	3.16554	4.65916	2.55159	2.44729	3.98704	3.76656	2.14426	2.72805	2.99595	3.351	2.31083	2.76619	2.51118	3.02077	2.56451	2.17137	3.63817	-1.21376	-2.63355	-1.49671	-0.960475	-3.55958	-0.830723	-0.824766	-2.15439	-0.274064	-0.590709	-1.47722	-1.35916	1.17569	2.3511	3.21965	5.19188	2.64236	2.69024	3.87129	3.79615	2.43661	2.58155	2.86876	3.70986	1.64431	3.49041	1.15884
	-1.49671	-0.960475	-3.55958	-0.830723	-0.824766	-2.15439	-0.274064	-0.590709	-1.47722	-1.35916	1.17569	2.3511	3.21965	5.19188	2.64236	2.69024	3.87129	3.79615	2.43661	2.58155	2.86876	3.70986	1.64431	3.49041	1.15884	4.08209	1.7625	2.8732	1.56988	2.34624	4.17911	2.94983	1.55251	1.62676	0.808492	1.81433	0.194268	0.853411	0.672659	0.579741	0.170978	0.349269	0.237748	0.351477	1.03781	0.719005	1.045	0.357818	0.607581
	2.3335	2.73338	3.55056	1.78842	2.3181	0.281682	2.82308	4.29331	2.21387	0.92427	3.12445	3.87564	3.26411	0.865319	0.896273	2.46972	5.16999	1.36503	1.63541	3.43978	4.39593	1.81847	1.06632	2.10397	3.58418	2.86876	0.767072	2.63833	1.17477	3.5293	3.65933	0.462178	1.91955	2.21367	3.68752	1.99191	1.54395	1.43919	0.131993	0.186209	0.531601	0.0990339	-0.329206	-2.00266	-2.31524	-1.77657	-0.622913	-0.927488	-1.80957
	-0.622913	-0.927488	-1.80957	-1.83546	-1.65802	-2.55525	-2.62857	-2.63683	-2.23076	-2.88211	-1.01399	-2.00763	-2.46094	-2.29226	-2.21248	-1.44034	-1.12351	-0.913145	-1.23806	-0.697956	-0.649445	-0.869015	-1.77214	-1.46644	-2.58076	-4.24158	3.06823	1.2882	1.90756	3.3956	1.66085	2.1867	3.40779	2.41445	2.33597	1.22505	2.70306	1.52088	3.96116	2.5337	1.90472	2.41272	2.65852	1.68957	1.2569	2.3504	1.2421	2.13412	1.90706
	1.68957	1.2569	2.3504	1.2421	2.13412	1.90706	1.47655	1.54704	2.45139	1.8202	1.17744	1.65751	2.14954	2.83745	4.00603	1.38882	1.67811	2.22522	3.08267	2.50763	1.8169	1.49164	1.30805	3.25642	2.12695	2.4574	2.22044	2.46915	3.35861	1.68962	1.93542	2.19478	2.29343	1.38576	1.92228	1.85058	1.02384	0.919257	0.73191	0.563182	0.211686	0.363254	0.113766	-0.936867	-0.818546	-1.77289	-1.61072	-0.802577	-0.329875
	-0.342387	-0.409518	-0.286249	-0.872887	-0.273722	-0.266622	-0.240819	-0.189843	-0.144175	-0.726022	-0.389247	-1.01581	-2.18255	-1.49991	-3.56637	-2.20644	-2.82585	-0.944388	-0.327689	-0.199419	-1.29163	-0.922633	-0.979041	-1.06251	-0.900108	-1.68213	2.88556	2.82686	0.761307	0.563671	0.700644	0.256599	1.30615	2.09516	1.78386	1.2663	1.98982	2.24093	1.76225	1.22364	1.46509	0.391229	1.91184	2.74132	1.05449	0.984234	0.289546	0.923125	1.1289
	-1.01581	-2.18255	-1.49991	-3.56637	-2.20644	-2.82585	-0.944388	-0.327689	-0.199419	-1.29163	-0.922633	-0.979041	-1.06251	-0.900108	-1.68213	2.88556	2.82686	0.761307	0.563671	0.700644	0.256599	1.30615	2.09516	1.78386	1.2663	1.98982	2.24093	1.76225	1.22364	1.46509	0.391229	1.91184	2.74132	1.05449	0.984234	0.289546	0.923125	1.1289	1.80935	0.923977	1.15694	0.543423	-0.722655	-1.54969	-2.96721	-1.55236	-2.34072	-1.35326	-1.55878
	1.955	2.30396	3.17962	2.44755	1.33276	1.20264	1.20203	1.32604	2.11516	2.05653	1.3291	1.13099	1.70852	2.6752	2.87424	2.45244	1.11849	1.58821	2.6357	2.4158	1.63584	1.77902	2.29179	1.79269	1.27124	2.98867	3.62831	1.7721	1.46861	1.62054	2.14361	1.58848	1.42233	3.1437	3.93242	1.76094	1.07254	1.93875	2.17874	2.77133	0.929534	3.03164	1.91069	1.38524	1.54847	1.13663	1.51579	0.571768	0.875928
	2.29179	1.79269	1.27124	2.98867	3.62831	1.7721	1.46861	1.62054	2.14361	1.58848	1.42233	3.1437	3.93242	1.76094	1.07254	1.93875	2.17874	2.77133	0.929534	3.03164	1.91069	1.38524	1.54847	1.13663	1.51579	0.571768	0.875928	2.0458	1.49824	0.333837	0.737092	0.934916	1.7481	1.53073	1.99397	2.44618	1.79848	1.12804	1.40091	2.31277	1.65467	0.368592	2.4945	3.93448	1.81931	-0.457417	-0.602883	-1.41856	-1.2286
	1.40091	2.31277	1.65467	0.368592	2.4945	3.93448	1.81931	-0.457417	-0.602883	-1.41856	-1.2286	-2.50132	-1.72621	-0.538071	-1.07073	-1.66467	-2.26288	-0.479525	-1.60003	-1.39855	-0.280735	-0.156332	-0.31966	-0.955873	3.89393	2.65684	1.42495	1.87035	4.70523	2.39626	2.22445	1.67367	2.63534	1.86167	2.9062	2.58476	3.10518	4.14341	1.15836	2.06012	2.01309	-0.192028	-1.38382	-1.54773	-1.76292	-0.86223	-0.514305	-2.13968	-4.69583
	1.89603	2.47757	3.47296	3.83984	3.7199	3.22483	1.68983	3.32147	3.11893	1.77124	2.68261	2.37987	3.32443	4.66585	2.78328	2.27915	0.0834579	4.0729	3.25124	2.16126	2.55045	4.13658	3.24415	1.96158	1.76759	3.14377	1.46003	1.67487	2.1642	1.50465	0.538927	1.84247	1.76837	1.42129	1.57926	2.67103	2.71771	2.78512	1.71542	1.75606	2.50491	-1.12423	-1.50531	-3.17839	-1.02814	-2.18069	-1.78444	-0.891648	-0.962875
	1.46313	2.76112	2.25918	2.62811	2.2976	2.39183	3.36024	1.92439	3.43819	1.94358	3.60033	3.21576	1.40833	1.5507	4.01392	3.61836	1.4761	2.90356	2.97458	2.8317	2.48458	1.45143	-0.517878	-0.902997	-1.1234	-0.631708	-0.682506	-0.193567	-0.710118	-0.580673	-2.25638	-4.87248	-0.886148	1.35199	1.34613	0.351726	0.549637	0.963287	2.87618	2.47616	1.57237	0.116814	0.0635428	1.34151	1.12079	0.136563	0.562338	1.49201	1.62808
	1.5507	4.01392	3.61836	1.4761	2.90356	2.97458	2.8317	2.48458	1.45143	-0.517878	-0.902997	-1.1234	-0.631708	-0.682506	-0.193567	-0.710118	-0.580673	-2.25638	-4.87248	-0.886148	1.35199	1.34613	0.351726	0.549637	0.963287	2.87618	2.47616	1.57237	0.116814	0.0635428	1.34151	1.12079	0.136563	0.562338	1.49201	1.62808	1.19331	1.62947	2.21242	2.97583	0.45335	1.65941	0.262501	0.273838	0.317046	0.496761	1.44566	1.45537	2.50836
	1.34613	0.351726	0.549637	0.963287	2.87618	2.47616	1.57237	0.116814	0.0635428	1.34151	1.12079	0.136563	0.562338	1.49201	1.62808	1.19331	1.62947	2.21242	2.97583	0.45335	1.65941	0.262501	0.273838	0.317046	0.496761	1.44566	1.45537	2.50836	2.78827	1.41238	2.05889	2.05083	0.556428	1.80028	2.57633	2.64506	2.32705	3.86063	1.83087	3.53632	2.45309	2.79881	2.762	2.28167	4.12666	4.02895	2.28856	2.59931	3.05082
	3.86063	1.83087	3.53632	2.45309	2.79881	2.762	2.28167	4.12666	4.02895	2.28856	2.59931	3.05082	3.38244	1.9098	2.42374	4.23751	1.78091	1.94725	1.72256	3.04228	-1.87419	-2.04374	-3.47079	-2.61616	-1.91633	-1.41486	-1.9652	-0.948929	-0.362793	-0.655058	-0.930159	-0.156292	-1.67352	-2.45432	3.97467	0.817568	2.67271	4.28989	2.64207	1.30718	2.07368	2.38974	3.10645	0.864363	2.41284	2.26883	2.55724	1.56307	3.37799
	1.56307	3.37799	3.10889	5.007	2.932	1.27824	3.83025	2.99458	2.56266	1.99193	2.73341	-2.43612	-2.05938	-2.64718	-1.58907	-0.77146	-1.97255	-2.09708	-2.91495	-2.61436	-3.00546	-2.66841	-3.15846	-2.7856	-1.73333	-2.12787	-2.31709	-2.79917	-2.30057	-1.72521	-0.341237	-1.26974	-0.785926	-0.35072	-0.522007	2.00283	1.50397	2.04504	1.24969	2.1315	1.83706	3.5405	2.17602	2.43009	2.38535	4.61266	2.3541	3.20533	3.0556
	2.13194	1.73893	1.74733	4.59758	3.01106	0.92067	2.04036	4.76805	2.87376	2.18227	2.33397	2.05761	2.80755	2.66097	2.92792	3.98692	1.94587	2.25082	1.17621	3.21135	3.44334	2.16082	2.3774	1.23737	0.946837	2.71973	2.73522	1.97241	1.36094	2.1762	1.81109	1.96999	0.855676	0.421916	1.6873	2.55506	2.66336	3.49688	0.539455	0.991529	0.957497	1.68777	1.03433	3.29543	2.43448	3.52446	2.65817	3.39672	2.29052
	-2.40561	-1.4166	-0.845032	-1.08488	-1.15351	-0.751177	-1.29978	-0.149158	-2.31561	-2.41033	-2.25385	-4.04879	-1.63039	-2.12915	-2.36822	-3.2066	-3.37205	-1.87368	-1.47056	-2.29718	-2.84358	-1.5981	-0.45749	-0.571364	-0.824602	-0.707849	-0.990347	-3.04156	3.14017	2.77493	4.22716	2.62482	3.57862	3.21162	2.32666	3.6961	4.31519	3.03925	1.70784	1.70716	3.64229	3.01681	3.43847	4.08862	2.50402	3.76315	3.09812	1.379	2.93478
	-1.05802	-2.34529	-4.53962	-3.01772	-1.52979	-1.54728	-2.59911	-2.41349	-1.83017	-0.983392	-0.831317	-0.702061	-0.281756	-0.766214	-0.64773	-1.38864	-2.65089	-3.31294	-2.0527	-0.518076	-4.76343	-1.46523	-4.41419	-2.90548	-2.0854	-1.49052	-2.61977	-3.00651	-0.721634	-1.7411	-0.836942	-0.262173	-2.03199	-2.2177	-1.27572	-3.16258	4.0838	2.1442	1.3201	3.63363	3.2478	3.22724	2.30874	3.2356	3.35249	2.57538	2.12736	4.05875	1.82024
	0.890943	1.27201	1.92158	2.81476	1.43127	1.06354	1.55644	1.80474	4.41825	2.9803	1.23174	1.88657	3.39825	4.17844	2.21809	2.06555	2.5342	2.86891	2.93842	2.49325	2.01175	2.49862	3.05172	2.32661	1.84792	3.0136	2.47962	3.10995	2.17866	0.675994	1.81029	2.33147	1.42365	1.87663	2.06187	3.72811	2.81669	1.66662	1.71004	1.54286	1.73071	1.89419	2.4629	2.23794	1.57059	2.39678	2.25886	2.74426	1.25619
	1.12033	0.45869	1.10269	1.32949	2.74979	3.16467	3.77268	2.94421	3.8657	-4.50302	-1.95254	-2.5249	-2.05925	-1.40299	-1.37973	-0.477627	-0.303022	-2.60082	2.51757	3.19551	2.34962	3.22033	3.84772	4.286	1.43144	4.07558	3.70587	3.28234	2.10631	2.67911	2.63041	1.34575	3.52295	1.3091	2.34034	3.43915	1.25211	1.31549	2.79883	0.532975	1.09971	-1.53405	-3.1658	-4.7811	-1.32282	-0.897024	-1.11685	-2.2732	-3.96403
	-0.802312	-1.42665	-1.13143	-0.769837	-0.987684	-0.866848	-1.72487	-1.48516	-1.5477	-3.44015	-0.415841	-0.245474	-1.86198	-3.15111	-3.05383	-2.21281	-2.13731	-5.15013	-1.85153	-0.162829	1.3666	2.4563	2.25731	0.286734	0.82749	1.89722	5.32248	3.5366	3.6928	3.72105	2.10238	2.63688	1.64106	3.33817	3.1138	2.13019	3.21881	1.30808	1.33266	2.32194	2.39949	3.42048	3.37656	4.00811	3.31156	3.1687	1.87836	3.3759	-3.43305
	1.01183	3.423	2.72159	3.13862	3.73235	2.87595	3.05877	1.80303	1.28814	1.88144	3.00616	3.81673	1.93719	3.13405	4.74158	2.7793	3.09592	0.755091	2.17802	2.60515	2.35777	2.56239	1.26849	0.979637	1.37464	0.818677	1.58245	1.51989	2.6326	3.00595	1.64905	1.33289	2.96588	2.79801	1.20751	2.57071	2.78467	2.61618	1.99919	3.28277	3.02005	2.38279	-3.30955	-1.94468	-1.59396	-2.97663	-1.08823	-0.592935	-0.267198
	-0.592935	-0.267198	-2.60755	-0.156686	-1.25759	-3.02356	-1.12362	-1.7135	-0.741378	-0.881	-0.277126	-0.638262	-1.71431	-1.10286	-1.26926	-1.09213	-1.73742	-3.33958	1.37406	2.05354	2.69174	2.27123	3.3139	2.41918	2.5108	2.27666	2.54358	3.3079	1.44918	3.94072	1.1086	3.84755	0.608029	1.6881	3.41008	3.47956	1.24897	6.23641	2.57661	0.406937	1.08101	-3.47812	-1.80317	-0.912428	-1.01636	-0.445937	-4.51556	-0.887989	-1.51478
	2.54358	3.3079	1.44918	3.94072	1.1086	3.84755	0.608029	1.6881	3.41008	3.47956	1.24897	6.23641	2.57661	0.406937	1.08101	-3.47812	-1.80317	-0.912428	-1.01636	-0.445937	-4.51556	-0.887989	-1.51478	-1.99453	-0.523673	-0.987267	-1.18106	-2.44761	-1.21215	-2.11548	1.31876	1.80876	4.1717	3.70054	1.4658	2.64169	6.3135	0.457375	1.55665	1.88231	1.73316	0.26335	4.86343	1.30485	3.13921	3.95267	1.56643	2.36723	-1.90571
	1.6881	3.41008	3.47956	1.24897	6.23641	2.57661	0.406937	1.08101	-3.47812	-1.80317	-0.912428	-1.01636	-0.445937	-4.51556	-0.887989	-1.51478	-1.99453	-0.523673	-0.987267	-1.18106	-2.44761	-1.21215	-2.11548	1.31876	1.80876	4.1717	3.70054	1.4658	2.64169	6.3135	0.457375	1.55665	1.88231	1.73316	0.26335	4.86343	1.30485	3.13921	3.95267	1.56643	2.36723	-1.90571	-1.50384	-2.22032	-2.79116	-1.52239	-1.87723	-3.71316	-1.50293
	1.55665	1.88231	1.73316	0.26335	4.86343	1.30485	3.13921	3.95267	1.56643	2.36723	-1.90571	-1.50384	-2.22032	-2.79116	-1.52239	-1.87723	-3.71316	-1.50293	-3.72716	-1.84788	-3.85493	-2.01283	-2.60335	-3.15027	-1.454	-0.469514	-0.594771	-0.383782	-0.88676	-1.01425	0.408465	4.3187	2.74341	2.68326	2.49238	5.08995	1.7773	1.66231	0.684571	0.976732	2.32069	5.8256	2.74403	1.96034	0.717368	3.00249	3.04531	0.890742	1.06754
	NaN	NaN	NaN	NaN	NaN	NaN	NaN	NaN	3.16779	2.0588	2.93061	2.73863	1.87924	2.28597	3.91323	2.99724	2.79615	1.38967	3.08502	1.31121	1.50025	1.81879	0.706081	1.66367	0.473612	0.5619	2.3568	2.65015	2.5045	2.38635	2.74401	1.62064	1.65584	3.30856	1.48265	2.0825	2.34521	1.91571	1.80211	0.55047	0.636333	2.61731	3.03012	1.51527	1.45245	3.46072	3.40772	1.92007	1.77304
	1.76417	1.66933	2.63882	2.80784	2.37444	1.65491	2.88996	1.99099	1.94325	4.27197	2.13906	1.75976	1.75475	2.93475	2.39044	2.00111	2.45857	1.93997	1.69115	1.63699	3.22874	2.22813	2.89951	2.16663	1.5399	1.26695	2.36001	3.03614	2.27798	2.42388	1.86151	2.67187	2.83009	1.62969	1.19776	2.94856	3.18648	2.92218	1.30703	1.91198	2.9333	2.56262	2.41719	3.52455	1.69526	3.4943	1.53724	3.16809	2.24934
	3.03614	2.27798	2.42388	1.86151	2.67187	2.83009	1.62969	1.19776	2.94856	3.18648	2.92218	1.30703	1.91198	2.9333	2.56262	2.41719	3.52455	1.69526	3.4943	1.53724	3.16809	2.24934	-2.59572	-2.16559	-0.865098	-1.00144	-0.288678	-0.44937	-1.04582	-2.4602	-2.2345	-1.71431	-3.39783	4.44277	2.77105	1.46566	0.734746	2.33974	1.93826	2.35233	1.29078	1.2368	0.270729	1.63659	1.58601	2.18364	1.99009	0.795315	1.3713
	3.38861	1.01481	1.92018	2.49526	0.969579	3.24098	1.27039	6.14142	2.75367	0.459567	3.97481	2.13481	2.86462	3.16657	2.43159	2.57175	1.86879	2.20439	3.33204	2.12889	2.00258	2.44006	3.91637	2.23622	3.12539	1.79811	1.80355	2.56654	2.0914	3.61074	1.92414	1.79179	2.43166	3.64358	1.60336	2.99781	2.24249	2.11429	2.81073	2.41819	1.74542	1.74732	1.33425	2.11047	2.80945	2.75635	1.19323	2.16827	1.62844
	4.65874	1.33304	1.71018	2.07568	3.00029	3.69913	1.16264	3.04283	3.34571	3.02752	2.06838	3.02812	2.41138	3.15133	-3.28903	-5.01637	-2.07208	-0.90708	-2.40469	-3.59445	-1.05731	-3.49388	-2.77871	-2.61012	-3.2056	-1.62564	-1.94681	-1.81126	-0.454797	-0.547438	-0.130041	-0.773051	-0.68533	-1.60781	-2.38881	-2.78631	1.971	4.59582	2.92361	1.96872	2.96938	2.86503	2.76694	1.27862	3.17791	6.07994	1.01508	0.770524	1.6947
	-1.8989	-1.61737	-2.58399	-2.79919	-1.44233	-1.91046	-0.82761	-0.577918	-0.458399	-0.913641	-0.308268	-0.630892	-2.4689	-2.51989	1.91688	2.77469	3.54804	2.93086	2.82423	2.51156	2.09966	1.51415	3.03417	2.26051	2.80278	1.14547	2.66504	3.78112	1.54531	1.38695	1.47317	4.35231	2.56416	1.23315	1.97003	3.5301	3.70268	0.730833	0.987034	1.62626	2.55931	2.8421	2.43975	2.52625	2.80574	3.34705	1.00215	2.0756	0.523043
	2.62684	2.39478	2.51193	3.38131	1.93343	3.38524	1.55197	-3.21993	-2.53194	-2.59438	-2.83759	-2.27677	-3.07019	-1.18833	-0.335458	-0.475147	-1.17239	-1.52625	-2.22744	-0.904326	-1.6716	-3.20611	-3.45315	-2.42733	-0.486756	-0.644725	-1.31622	-1.75412	-2.05378	-3.38385	-3.72184	2.38419	2.63713	2.66064	2.50381	3.23311	1.55759	3.72418	2.42043	2.15362	2.33846	-2.27995	-2.26	-3.71592	-2.41507	-2.60831	-2.07209	-2.93299	2.14236
	-2.22744	-0.904326	-1.6716	-3.20611	-3.45315	-2.42733	-0.486756	-0.644725	-1.31622	-1.75412	-2.05378	-3.38385	-3.72184	2.38419	2.63713	2.66064	2.50381	3.23311	1.55759	3.72418	2.42043	2.15362	2.33846	-2.27995	-2.26	-3.71592	-2.41507	-2.60831	-2.07209	-2.93299	2.14236	2.74793	0.557146	1.30461	2.68343	4.31361	1.42686	3.19717	3.09196	3.15436	2.46873	2.35875	1.25405	2.13557	1.55023	1.72502	1.31901	1.20108	1.61047
	-2.42733	-0.486756	-0.644725	-1.31622	-1.75412	-2.05378	-3.38385	-3.72184	2.38419	2.63713	2.66064	2.50381	3.23311	1.55759	3.72418	2.42043	2.15362	2.33846	-2.27995	-2.26	-3.71592	-2.41507	-2.60831	-2.07209	-2.93299	2.14236	2.74793	0.557146	1.30461	2.68343	4.31361	1.42686	3.19717	3.09196	3.15436	2.46873	2.35875	1.25405	2.13557	1.55023	1.72502	1.31901	1.20108	1.61047	1.29585	1.57208	0.346964	1.11053	0.667865
	-2.26	-3.71592	-2.41507	-2.60831	-2.07209	-2.93299	2.14236	2.74793	0.557146	1.30461	2.68343	4.31361	1.42686	3.19717	3.09196	3.15436	2.46873	2.35875	1.25405	2.13557	1.55023	1.72502	1.31901	1.20108	1.61047	1.29585	1.57208	0.346964	1.11053	0.667865	0.933972	1.39952	3.00453	2.37515	1.77869	3.61231	1.79124	2.35171	2.4435	1.80189	2.73802	2.75306	2.68508	2.50006	1.53277	3.93589	3.45305	2.40705	1.82618
	-3.38947	-2.6095	-1.07601	-0.19538	-2.5672	-3.38169	-3.52397	-2.4752	-1.7178	-2.21852	-2.50813	-2.9732	-1.83541	-1.37518	-1.76999	-2.01566	-1.59945	-0.347027	-1.02188	-0.393386	-0.680856	-1.92979	-2.27669	-2.41609	2.54758	2.42917	3.11677	2.32772	3.08106	3.40419	2.18656	2.52909	3.83618	2.98523	3.02827	2.07587	3.1821	3.35912	1.99581	2.61612	3.10544	2.80816	2.71292	2.44213	2.56485	3.33533	2.84637	3.15979	1.70984
	-2.50258	-3.11755	-2.00373	-2.72123	-0.577631	-4.64857	-2.34307	-3.60498	-2.12091	-1.3722	-2.71067	-2.60425	-3.13991	-1.59848	-1.68287	-1.19404	-1.95277	-1.22353	-0.651111	-0.537036	-0.432026	-0.539607	-0.428305	-0.923083	-1.85922	-2.17042	2.36624	3.97493	2.68683	2.55785	2.45948	3.38531	2.06598	2.13772	2.22123	4.20475	2.93004	3.01619	1.74693	1.56943	2.98293	2.85724	2.26097	2.01046	2.73295	5.67598	2.42216	1.56639	2.94504
	3.71647	1.8405	2.49746	2.5463	2.77619	4.27891	1.58419	2.32426	4.00733	2.59516	2.04588	3.2291	2.37324	2.06786	2.24641	2.38475	4.31604	1.31425	1.34989	2.37008	2.42671	3.14695	1.85592	2.53237	2.3862	1.70927	3.55543	2.52939	3.39723	1.90205	2.00894	1.23283	1.18028	1.8976	3.04237	2.36294	1.00793	2.6175	1.466	1.39517	2.91	4.49511	2.08731	2.63315	3.26591	3.98861	-1.81918	-3.0761	-3.72154
	-0.396928	-0.266627	-0.411268	-0.556023	-0.720802	-0.151552	-2.19273	-2.7673	-1.88658	-3.58013	-3.35339	-2.23353	-1.76557	3.76996	2.58959	1.99069	2.61096	4.58289	2.17485	1.1549	4.87627	1.99083	2.7012	1.98828	4.27224	2.56611	2.53042	2.08696	4.36	1.91755	3.28153	2.27866	4.28928	2.20239	1.01046	1.26013	3.09505	2.4351	4.0918	3.22605	2.30796	2.35081	1.6806	3.19513	2.45484	2.22812	2.83808	3.67225	2.31639
	2.13577	3.06115	2.29135	4.96261	2.30495	3.31287	2.07895	3.44036	4.47551	1.25462	2.35068	3.56444	3.89933	1.09015	1.63205	2.25428	3.1847	1.79053	5.01263	2.27033	3.08639	1.89043	3.66357	2.46852	5.08819	3.04875	2.38549	2.41681	3.07143	1.91468	2.25175	2.45104	1.85821	2.42511	1.37522	2.87556	4.31403	2.884	1.29051	2.88668	1.87383	0.807218	2.49219	1.69243	4.0814	1.6354	3.14015	2.0881	2.84303
	3.74989	1.90527	3.82014	3.03133	2.86892	1.87647	2.01568	1.66693	3.07857	4.15926	3.85153	2.57954	2.10322	2.06934	1.65234	3.19	3.28789	4.55893	2.54835	2.09965	2.82313	3.27059	1.80495	3.18888	1.82853	2.17268	2.30041	2.49229	2.2533	3.0407	2.86282	2.7516	2.03957	2.73533	2.62364	3.10074	1.8911	1.79176	3.34058	3.53881	2.06569	2.21913	1.19737	2.84455	2.73715	2.46012	1.98285	2.21401	2.70632
	2.57954	2.10322	2.06934	1.65234	3.19	3.28789	4.55893	2.54835	2.09965	2.82313	3.27059	1.80495	3.18888	1.82853	2.17268	2.30041	2.49229	2.2533	3.0407	2.86282	2.7516	2.03957	2.73533	2.62364	3.10074	1.8911	1.79176	3.34058	3.53881	2.06569	2.21913	1.19737	2.84455	2.73715	2.46012	1.98285	2.21401	2.70632	3.49812	2.32071	3.17515	3.57099	2.60711	1.45914	3.35862	3.55893	2.52878	1.65325	2.87307
	1.18259	3.59339	2.92806	1.76429	1.47209	4.99023	1.96561	2.18002	3.37668	3.73435	1.82123	0.909506	3.18663	3.46534	0.621984	4.84029	4.02009	1.4984	1.16134	2.71443	1.77693	2.33926	2.56334	4.3414	3.51914	2.3363	2.80527	2.43402	1.4319	2.39253	2.20434	2.16691	3.08376	4.21163	0.994625	2.43273	2.95689	3.09772	2.47042	2.79175	4.12411	2.38237	2.69269	2.25539	2.49787	2.26983	2.98315	2.78464	3.42521
	-1.61486	-0.863995	-1.43	-2.37264	-1.128	-2.42464	-0.9484	-3.18686	-2.89666	-1.46796	-3.21364	-2.66918	-2.38362	-2.17207	-2.20873	-1.20242	-0.917167	-2.07593	-1.85636	-0.481446	-0.485436	-0.0995365	-0.0889632	-0.346518	-1.52513	-2.48842	-2.51634	2.49752	1.25111	4.032	2.48084	3.20665	3.18367	1.91441	2.86116	2.8443	2.85839	1.86756	3.59596	1.99122	3.30648	2.8326	2.67724	2.39639	3.85352	2.95668	2.21576	2.93712	3.21406
	2.67724	2.39639	3.85352	2.95668	2.21576	2.93712	3.21406	2.67833	1.81655	3.11041	2.68918	2.46835	2.67213	1.93622	3.67358	1.96375	3.78376	3.01721	1.75085	2.00865	3.30342	2.09332	1.69607	3.45508	2.1331	3.46919	3.38119	1.7934	2.76634	3.06139	3.44317	1.30345	2.41629	4.24917	2.35435	2.32668	2.07617	3.00821	3.81399	2.40974	2.35162	3.13422	2.97118	2.46857	3.38983	3.75403	1.25994	1.87436	3.90086
	4.55627	2.44694	1.93182	2.26067	3.64268	1.16323	3.32887	1.82203	4.41524	1.8825	2.12418	2.03681	2.82854	3.29388	2.52845	2.62069	3.25063	3.53719	1.58697	1.71094	2.32747	1.99792	4.17706	3.54776	1.43284	2.09016	2.41124	2.13306	4.02007	0.788951	3.46359	2.01916	3.77873	2.3462	1.84404	2.94483	2.84823	2.05601	3.05949	3.18496	2.60243	2.53411	2.80323	3.81387	1.26159	2.06278	2.15581	-2.13082	-1.41411
	2.5172	3.41566	2.12273	2.48622	2.06619	3.29085	3.85467	2.18463	1.77462	1.07612	3.96514	2.41048	3.57905	2.21175	1.11411	2.15861	3.88084	2.60788	1.1002	0.819272	3.25651	2.66358	1.33425	3.04666	2.28411	1.95186	2.38278	3.01701	2.64049	2.15644	1.62814	3.35218	2.96837	1.9313	1.51794	1.66849	0.828829	0.990013	2.24878	1.75544	2.62325	2.29207	2.32724	3.15804	2.27112	1.87364	2.94212	2.92406	2.26517
	3.60692	1.50588	2.66172	3.29779	2.69551	2.61553	0.827281	2.09761	3.07544	2.22358	2.66347	2.58201	0.599152	1.86023	4.06871	2.93532	2.71642	3.28151	1.89596	1.7524	3.46452	3.63556	1.47774	2.95588	2.1605	2.16376	3.05893	1.70243	2.74936	2.71317	2.60595	1.59878	2.63199	2.80974	2.45116	1.93475	2.83059	1.9558	3.16188	2.71679	3.07432	1.6781	1.80322	3.52196	3.2606	1.95129	2.18911	4.03042	2.06533
	2.99842	3.51766	2.18487	1.62185	0.0942816	1.4714	1.88358	3.61137	2.68872	0.67555	0.735754	-0.509493	-2.19631	-1.21401	-2.36394	-0.754283	-0.808173	-0.198623	-0.272995	-0.35614	-0.181214	-0.761368	-0.807234	-1.73636	-3.46438	-0.915263	-0.404849	1.98216	2.04245	3.52426	2.58966	0.294509	2.0659	2.65441	2.31842	1.33809	2.02739	0.314022	1.52958	3.31224	2.43516	0.334341	2.58784	1.26099	2.58304	3.77914	0.376494	1.21732	1.78405
	1.4714	1.88358	3.61137	2.68872	0.67555	0.735754	-0.509493	-2.19631	-1.21401	-2.36394	-0.754283	-0.808173	-0.198623	-0.272995	-0.35614	-0.181214	-0.761368	-0.807234	-1.73636	-3.46438	-0.915263	-0.404849	1.98216	2.04245	3.52426	2.58966	0.294509	2.0659	2.65441	2.31842	1.33809	2.02739	0.314022	1.52958	3.31224	2.43516	0.334341	2.58784	1.26099	2.58304	3.77914	0.376494	1.21732	1.78405	1.72016	2.13808	0.932041	0.439698	0.911795
	-0.198623	-0.272995	-0.35614	-0.181214	-0.761368	-0.807234	-1.73636	-3.46438	-0.915263	-0.404849	1.98216	2.04245	3.52426	2.58966	0.294509	2.0659	2.65441	2.31842	1.33809	2.02739	0.314022	1.52958	3.31224	2.43516	0.334341	2.58784	1.26099	2.58304	3.77914	0.376494	1.21732	1.78405	1.72016	2.13808	0.932041	0.439698	0.911795	2.39551	2.26866	1.17128	0.68453	-0.502474	-0.521365	-0.675876	-2.38971	-0.705494	-0.136401	-0.569256	-1.42554
	1.37689	2.14345	2.31867	2.36389	1.21517	2.07667	2.05705	1.92777	2.275	1.30904	1.77736	1.0328	1.90654	1.31432	2.29275	0.828551	0.767768	-0.897057	-0.887726	-3.15864	-1.77995	-2.98478	-1.53369	-1.61108	-3.04843	-1.96056	-1.76009	-1.93789	-0.545209	-1.50673	3.5382	0.855081	1.29444	2.18468	0.505948	1.11335	1.49909	1.05011	0.974953	0.979738	1.07192	0.649568	-0.953308	-1.84006	-2.04703	-2.40212	-1.21474	-1.13345	-2.77106
	-1.77995	-2.98478	-1.53369	-1.61108	-3.04843	-1.96056	-1.76009	-1.93789	-0.545209	-1.50673	3.5382	0.855081	1.29444	2.18468	0.505948	1.11335	1.49909	1.05011	0.974953	0.979738	1.07192	0.649568	-0.953308	-1.84006	-2.04703	-2.40212	-1.21474	-1.13345	-2.77106	-0.551634	2.76715	2.74053	1.59711	0.970242	1.95718	2.14703	2.41391	2.26246	1.01045	1.65912	1.0636	1.88378	1.94947	1.34726	-1.16867	-1.17241	-0.851967	-1.06081	-1.60518
	1.51281	2.83793	3.00748	0.2607	4.17266	2.12746	2.22164	2.07966	2.59624	1.62409	1.91283	2.41349	0.872389	2.21489	2.366	2.058	1.26369	1.55781	3.01672	3.07574	2.3749	1.68603	0.778926	0.887333	1.0086	1.92957	1.40605	2.23976	1.6742	1.69692	2.10847	2.16922	2.39646	1.36715	1.18129	1.51808	0.221199	1.79475	1.67936	1.16064	1.59337	1.56845	1.93133	1.0209	-4.56587	-1.60049	-1.78899	-0.742418	-0.844354
	-1.43385	-2.32965	3.22722	3.07313	1.2517	0.845118	1.11275	2.20796	1.03887	4.00657	1.55269	0.70467	1.63481	2.46331	1.8031	1.68038	0.901762	1.43069	2.78982	3.25528	1.2778	1.7943	0.647823	1.26297	1.90568	1.38463	2.17229	1.18058	1.1127	1.15247	1.72929	1.03068	2.23556	1.75718	1.07246	3.21525	2.87978	1.97733	2.41501	1.73554	2.45906	2.34902	1.50162	1.26725	0.882326	1.56631	0.847117	2.53456	1.0094
	2.20796	1.03887	4.00657	1.55269	0.70467	1.63481	2.46331	1.8031	1.68038	0.901762	1.43069	2.78982	3.25528	1.2778	1.7943	0.647823	1.26297	1.90568	1.38463	2.17229	1.18058	1.1127	1.15247	1.72929	1.03068	2.23556	1.75718	1.07246	3.21525	2.87978	1.97733	2.41501	1.73554	2.45906	2.34902	1.50162	1.26725	0.882326	1.56631	0.847117	2.53456	1.0094	2.41002	2.62471	0.820229	1.45071	2.38423	1.53265	2.52002
	-1.23714	-0.397337	-0.721618	-0.938552	-2.08679	-2.44345	-3.50799	-1.35399	-1.65885	-0.288545	-0.798184	-0.438588	-1.05471	-1.10558	-0.604113	-0.464581	-1.26906	-0.506626	-0.456	-0.362488	-0.395748	-1.97825	2.6226	1.23323	0.845416	0.908442	0.747117	1.29862	2.49234	2.42244	1.09899	1.66492	0.919603	0.749437	1.62813	3.97586	0.70683	0.804039	1.4457	2.03529	2.19505	-0.508936	-1.80566	-2.38541	-2.60362	-0.856086	-1.30222	-1.3436	-2.23978
	-0.392805	-0.118554	-0.0282268	-0.911425	-0.103788	-1.21804	-1.62097	-0.297178	-1.4495	-0.159294	-1.50994	-1.49429	-3.81768	-1.48734	-2.30004	-1.93435	-0.702923	-0.402911	-2.52088	-2.11377	-2.02558	-1.00744	-0.344701	-0.723937	-0.648566	-1.36988	-2.8032	1.294	4.82999	0.983594	1.90888	2.57387	0.554863	1.76316	1.30197	0.166871	1.59787	1.52672	1.56734	1.78456	1.0294	1.02538	0.974978	0.90502	1.48161	1.61542	2.37781	0.703524	0.325775
	-2.80786	-1.2939	-2.29912	-1.80765	-2.72566	-0.888885	-0.401931	-0.262371	-0.268974	-2.11233	-1.5426	-0.412212	-0.33243	-0.801477	-0.797884	-2.59529	-1.4833	-2.15985	2.79227	1.93908	0.659064	1.47422	3.95505	2.10458	1.61175	0.421232	1.07216	1.90756	1.63984	1.68364	0.903542	2.75021	3.54551	0.912854	1.19047	2.12021	1.67812	2.85871	1.41939	0.94932	1.42168	1.17799	1.5134	0.757494	1.52278	-2.71832	-1.22267	-0.669702	-1.76562
	-2.29474	-1.94429	-1.39542	-0.910145	-1.04164	-0.739339	-1.98716	-0.411654	-1.09108	-0.786009	-0.123071	-0.366712	-1.25471	-1.5923	-1.88578	-0.246643	0.869441	1.85528	4.82526	1.48557	1.27411	1.18162	1.69844	2.70657	2.038	1.43166	1.83433	1.42528	3.51525	2.36814	1.43596	1.33429	0.98027	2.7746	1.62056	2.17457	2.32764	1.54277	1.96942	2.48431	2.58452	2.16245	0.63892	1.00357	0.86573	2.07587	2.15391	0.198429	0.774364
	-2.38828	-1.79933	-2.15198	-2.96476	-1.30266	-1.10145	-1.59818	-1.18853	-1.25166	-1.11785	-1.54359	-0.297713	-0.0380242	-0.332164	-0.834217	-0.926122	-2.42974	-2.41959	1.21605	1.4136	1.23644	2.1245	2.45059	0.94339	1.43667	2.32578	2.40269	1.5296	1.64184	2.58714	2.13895	0.843861	2.47761	1.96977	1.78025	2.73155	1.20647	1.86195	2.59953	3.24346	1.56355	0.260546	2.31973	2.67665	3.05504	2.184	2.00192	0.78125	1.75468
	1.4136	1.23644	2.1245	2.45059	0.94339	1.43667	2.32578	2.40269	1.5296	1.64184	2.58714	2.13895	0.843861	2.47761	1.96977	1.78025	2.73155	1.20647	1.86195	2.59953	3.24346	1.56355	0.260546	2.31973	2.67665	3.05504	2.184	2.00192	0.78125	1.75468	2.45913	2.82862	2.34888	1.0726	0.817889	0.968193	1.07537	1.88449	1.89019	1.35991	2.37395	0.359864	1.80592	1.84289	1.0825	4.06659	2.72912	1.62367	1.48644
	2.34888	1.0726	0.817889	0.968193	1.07537	1.88449	1.89019	1.35991	2.37395	0.359864	1.80592	1.84289	1.0825	4.06659	2.72912	1.62367	1.48644	1.48983	0.966588	1.08461	2.38958	1.74528	1.8138	2.83169	2.2486	0.833169	2.40458	1.59901	1.52814	1.59107	0.865173	1.24097	0.802587	0.908378	0.654967	1.80993	1.44644	2.21205	1.87119	1.40084	1.19794	2.00326	2.81771	1.48237	1.89357	1.35708	1.12755	1.31798	2.66114
	1.88449	1.89019	1.35991	2.37395	0.359864	1.80592	1.84289	1.0825	4.06659	2.72912	1.62367	1.48644	1.48983	0.966588	1.08461	2.38958	1.74528	1.8138	2.83169	2.2486	0.833169	2.40458	1.59901	1.52814	1.59107	0.865173	1.24097	0.802587	0.908378	0.654967	1.80993	1.44644	2.21205	1.87119	1.40084	1.19794	2.00326	2.81771	1.48237	1.89357	1.35708	1.12755	1.31798	2.66114	1.80905	2.37777	1.2899	2.50723	1.76021
	2.36698	1.47801	1.95347	2.49025	1.23908	1.68258	1.94563	1.63692	1.87532	2.45864	2.45818	1.26776	1.32449	1.70842	1.66861	2.58278	1.83625	1.00214	1.19654	1.98898	1.81986	2.82105	0.833788	0.696253	1.80031	0.675318	2.60338	1.89705	1.63857	2.23063	1.09579	2.29432	3.03965	1.67347	1.47477	0.902508	0.646373	1.70812	2.63337	1.40228	0.722331	1.0111	1.59259	1.42666	1.70013	2.62366	1.3867	0.596641	1.09057
	-2.14771	-2.29455	-1.87743	-1.08351	2.41232	1.2952	1.37064	2.60415	2.56163	1.98091	0.897801	0.986085	0.248114	1.93323	3.94587	1.75139	1.90625	1.21433	1.10286	1.32015	2.31664	2.56959	1.25118	1.30357	1.25634	1.86093	2.18821	1.06077	0.649776	1.20207	1.74482	3.2491	1.66621	0.699906	1.4875	0.479976	0.825906	0.414609	1.08166	1.90921	1.25294	0.343563	1.11937	2.20654	0.556144	0.506859	0.452987	0.408977	1.50117
	-0.224113	-0.0839046	-0.317429	-0.155281	-0.0422297	-0.70788	-0.793014	-1.35273	-0.437749	-0.74315	2.28229	1.25812	1.75067	0.785383	0.4305	0.36522	0.832668	1.2244	3.22833	1.06774	1.17517	0.900053	1.04812	0.475119	0.227633	1.07912	1.24441	0.340817	1.65576	1.19972	1.11481	2.70484	0.931575	0.5324	0.857698	2.08835	2.49359	1.09415	1.55978	1.20189	0.7062	1.31196	1.88008	2.1273	3.32272	1.21239	1.53001	2.84063	1.52724
	0.0637637	1.65128	1.9407	2.65534	3.1167	0.481265	0.79362	0.706799	0.858556	0.722488	1.75878	1.6597	0.921448	1.29249	2.13487	2.24184	2.70399	0.130909	1.04141	2.43314	4.12924	2.11611	1.21598	1.73187	1.25154	0.842623	2.57075	2.35972	2.02168	1.10198	2.80476	1.12995	1.65578	2.99487	2.16155	1.49734	1.83055	2.15616	1.87364	0.977548	3.56208	1.77669	0.626186	0.938854	1.37562	3.28567	1.04742	0.455881	0.750865
	2.39246	1.10949	0.245164	1.56802	3.17919	1.21038	2.81087	1.82894	-0.425116	-0.192872	-0.376826	-3.37096	-1.43561	-0.419513	-2.27918	-1.54916	2.04431	1.92391	1.07787	2.40722	2.51321	1.61672	1.91356	1.34304	1.08069	1.14759	1.8298	2.08434	2.35511	1.35008	1.59578	1.72639	0.982392	1.46634	2.06772	2.18689	1.33128	1.63771	2.24341	1.38647	1.60981	-1.70269	-3.28424	-1.25002	-0.524496	-0.462066	-2.04609	-0.895502	-0.675084
	1.55168	1.02046	1.82634	1.82237	-1.12783	-0.193417	-1.41746	-1.01593	-2.02956	-1.23607	-0.457999	-0.507868	-0.412198	-1.50541	-2.18633	-3.00404	-1.2266	-1.29589	-1.40307	-1.19619	-0.73961	-0.173997	-0.350515	-0.506571	-0.712892	-0.974312	-1.55903	-1.66377	-1.41063	-1.60474	1.95996	2.75324	4.22309	1.94156	0.498966	1.2904	2.37925	2.75782	0.538928	1.94803	2.01914	1.45278	1.41648	1.87544	1.42594	2.03397	2.20474	2.60309	0.967255
	3.70381	1.06704	1.5238	0.970311	1.92891	1.81462	0.666663	2.19628	3.77811	0.938224	-2.17885	-0.816481	-1.28694	-0.37008	-0.951605	-1.10479	-2.80516	-2.32941	-2.20972	-2.18988	-2.14493	-0.270291	-0.539922	-0.883157	-0.364102	-0.331885	-0.749512	-1.27295	-2.05051	1.03434	1.69701	3.38321	1.68902	1.38289	1.96616	1.99334	1.93019	2.41075	1.50981	2.83183	1.87771	1.82373	1.65829	1.78204	2.61135	2.45586	0.882326	1.49426	0.0722657
	1.63479	3.17038	1.21257	1.47742	3.45991	-2.82801	-1.7356	-0.856325	-1.91471	-1.48519	-2.14729	-1.13492	-0.335761	-1.85421	-1.03841	-0.91036	-1.15384	-0.472069	-0.186939	-1.26113	-1.92522	-0.975731	-0.981796	-1.27343	2.05715	2.98919	3.61567	0.497729	1.37459	1.48109	0.772878	3.9325	2.34759	1.50384	0.649087	2.06055	0.8314	1.97919	3.07496	1.82864	2.05849	0.503122	1.8185	0.074966	1.9764	2.54922	2.25408	1.48563	2.68489
	-1.85421	-1.03841	-0.91036	-1.15384	-0.472069	-0.186939	-1.26113	-1.92522	-0.975731	-0.981796	-1.27343	2.05715	2.98919	3.61567	0.497729	1.37459	1.48109	0.772878	3.9325	2.34759	1.50384	0.649087	2.06055	0.8314	1.97919	3.07496	1.82864	2.05849	0.503122	1.8185	0.074966	1.9764	2.54922	2.25408	1.48563	2.68489	0.558187	2.00329	1.58967	1.6795	0.55466	1.54684	2.41863	1.59108	1.33768	2.50062	0.824208	-1.56892	-0.527358
	-1.26113	-1.92522	-0.975731	-0.981796	-1.27343	2.05715	2.98919	3.61567	0.497729	1.37459	1.48109	0.772878	3.9325	2.34759	1.50384	0.649087	2.06055	0.8314	1.97919	3.07496	1.82864	2.05849	0.503122	1.8185	0.074966	1.9764	2.54922	2.25408	1.48563	2.68489	0.558187	2.00329	1.58967	1.6795	0.55466	1.54684	2.41863	1.59108	1.33768	2.50062	0.824208	-1.56892	-0.527358	-1.83401	-2.89144	-0.954949	-0.547018	-1.34222	-0.118202
	2.60114	3.77453	1.63853	2.09723	2.58175	2.86621	2.16466	1.04547	2.06393	2.68825	3.14212	2.25427	2.72717	2.85786	0.833216	1.88006	2.83108	1.93389	1.50009	3.09747	3.98758	1.36069	1.41742	0.898937	2.70371	3.21167	2.35502	1.76674	1.44053	1.75589	3.46531	3.03311	1.6347	0.659529	0.337387	3.3761	3.44255	2.21621	0.749673	2.87539	3.17903	2.33972	1.31565	2.05606	3.73903	1.9464	0.347248	1.77667	3.17496
	0.947359	2.51927	4.06105	1.01921	0.680469	1.66072	2.7404	4.50881	1.11967	0.658633	1.71188	2.22205	4.29103	2.04611	1.4848	3.1458	1.36827	3.50486	2.67767	1.87294	1.8285	2.49961	3.97141	1.03846	0.362545	2.12276	2.81439	4.8901	0.548597	1.37692	2.78951	2.47657	2.89119	1.477	3.02602	2.18395	1.57131	0.696289	2.49626	2.51317	2.66633	1.193	2.5154	0.726177	2.70294	1.33958	2.7792	2.63196	2.02464
	1.69578	3.3597	3.00632	0.600327	2.86543	2.36099	2.38883	3.74389	0.844114	1.76761	2.33258	2.93015	2.76109	1.91889	1.58474	2.18961	2.25193	2.20576	1.62621	1.42378	1.09392	0.461918	0.444892	0.212175	2.56153	2.67305	1.72058	1.0027	1.7358	1.19084	3.52963	2.80176	2.31894	3.77665	1.79487	2.3984	0.958318	2.77738	1.34544	1.78319	3.41037	-1.23824	-0.649996	-0.511365	-1.80276	-1.20745	-1.98534	-1.50499	-1.99713
	2.23239	2.00906	1.67929	1.45201	2.82027	2.76878	-2.26091	-1.85598	-0.87891	-0.459819	-0.720112	-0.886733	-2.03081	-1.06381	-2.74092	-3.85651	-1.37196	-2.12573	-2.44687	-2.90998	-1.94839	-0.938047	-2.30343	-2.63555	-2.45714	-2.08344	-0.774983	-0.317754	-2.00605	-1.98223	-1.50886	-0.819413	-1.00318	-1.33462	1.76463	2.22463	0.88378	3.02564	2.23434	1.44778	1.52179	1.12927	2.88482	2.69181	0.78264	3.42614	2.02397	2.74679	1.1522
	-2.03081	-1.06381	-2.74092	-3.85651	-1.37196	-2.12573	-2.44687	-2.90998	-1.94839	-0.938047	-2.30343	-2.63555	-2.45714	-2.08344	-0.774983	-0.317754	-2.00605	-1.98223	-1.50886	-0.819413	-1.00318	-1.33462	1.76463	2.22463	0.88378	3.02564	2.23434	1.44778	1.52179	1.12927	2.88482	2.69181	0.78264	3.42614	2.02397	2.74679	1.1522	1.78622	2.59141	2.75224	1.95026	1.97006	1.8397	3.11	1.27973	1.83904	2.67272	2.65527	2.50849
	2.02397	2.74679	1.1522	1.78622	2.59141	2.75224	1.95026	1.97006	1.8397	3.11	1.27973	1.83904	2.67272	2.65527	2.50849	1.80654	1.98394	1.91146	2.74831	2.46728	1.64012	1.24311	2.31777	3.64554	2.71588	1.67104	1.87074	1.76302	3.72367	2.5106	1.04452	1.66417	1.38957	5.03419	1.85679	1.80305	2.82059	1.37909	3.81097	2.08731	2.0603	1.71717	1.58895	3.9519	1.13015	1.17565	2.33599	2.06475	2.31469
	1.80654	1.98394	1.91146	2.74831	2.46728	1.64012	1.24311	2.31777	3.64554	2.71588	1.67104	1.87074	1.76302	3.72367	2.5106	1.04452	1.66417	1.38957	5.03419	1.85679	1.80305	2.82059	1.37909	3.81097	2.08731	2.0603	1.71717	1.58895	3.9519	1.13015	1.17565	2.33599	2.06475	2.31469	2.72215	1.38444	2.98248	1.95647	1.08948	4.0849	2.14097	1.93715	1.87132	2.01015	3.33018	1.368	1.71952	2.20283	3.66512
	1.73248	3.00964	1.55726	3.53966	2.80947	1.24213	1.33037	1.44412	1.82748	1.98408	3.7359	1.78325	1.11018	0.65811	1.11066	1.45338	0.956363	1.46434	1.86364	2.76157	2.41937	1.30787	0.456821	2.65811	2.99526	2.85464	0.855216	3.7792	1.42284	3.24803	2.83668	1.70754	2.8002	0.695656	1.32292	1.10118	0.197756	2.22818	1.70431	1.18221	0.996525	0.587737	1.18921	1.11188	2.41786	1.40129	1.72739	1.42696	3.13253
	2.07512	2.56828	0.338338	1.15376	3.03948	1.50352	2.75374	1.22603	0.691444	2.96521	3.99186	1.09143	0.626424	1.72682	5.97406	2.54627	1.27687	0.527767	2.03917	2.69851	1.94762	2.40487	1.30132	1.65047	2.46866	1.17589	2.67675	1.30322	0.808658	0.223587	1.02889	0.931413	0.209408	0.633172	2.0452	1.48884	1.47712	0.118329	0.409993	0.211962	0.805774	0.402147	1.37755	1.98523	1.38656	1.04888	0.64737	1.29911	3.6173
	0.527767	2.03917	2.69851	1.94762	2.40487	1.30132	1.65047	2.46866	1.17589	2.67675	1.30322	0.808658	0.223587	1.02889	0.931413	0.209408	0.633172	2.0452	1.48884	1.47712	0.118329	0.409993	0.211962	0.805774	0.402147	1.37755	1.98523	1.38656	1.04888	0.64737	1.29911	3.6173	2.9488	0.401758	0.306479	0.684315	1.13776	0.341771	0.0159609	0.315699	0.955481	0.0565084	-1.41416	-2.04235	-2.01251	-1.19056	-1.38312	-1.38574	-0.56335
	-1.71283	-1.89866	-2.93614	-2.82709	-1.92154	-1.47386	-1.65404	-0.673948	-1.93451	-2.24763	-2.31043	-0.930794	-0.23181	-1.06217	-0.746509	-0.942731	-0.414853	-0.305564	-0.782009	-1.48685	1.86454	2.44678	3.59645	2.43865	2.54265	0.65005	1.42736	4.13704	2.37012	1.70983	2.82561	2.36628	1.50982	2.54603	3.28135	1.51022	2.86076	2.24919	3.45676	3.61547	1.33867	2.29778	1.96631	1.63881	1.53918	1.77478	1.04057	3.09364	3.00847
	-1.93451	-2.24763	-2.31043	-0.930794	-0.23181	-1.06217	-0.746509	-0.942731	-0.414853	-0.305564	-0.782009	-1.48685	1.86454	2.44678	3.59645	2.43865	2.54265	0.65005	1.42736	4.13704	2.37012	1.70983	2.82561	2.36628	1.50982	2.54603	3.28135	1.51022	2.86076	2.24919	3.45676	3.61547	1.33867	2.29778	1.96631	1.63881	1.53918	1.77478	1.04057	3.09364	3.00847	1.92145	0.798296	2.48815	2.52484	1.95542	1.93641	1.16706	1.51336
	2.43865	2.54265	0.65005	1.42736	4.13704	2.37012	1.70983	2.82561	2.36628	1.50982	2.54603	3.28135	1.51022	2.86076	2.24919	3.45676	3.61547	1.33867	2.29778	1.96631	1.63881	1.53918	1.77478	1.04057	3.09364	3.00847	1.92145	0.798296	2.48815	2.52484	1.95542	1.93641	1.16706	1.51336	2.57119	3.04334	2.88346	0.860224	1.37023	2.16656	2.76093	1.14932	0.237626	0.925733	1.19618	1.68242	1.3746	2.90998	1.77773
	-1.81988	-2.21498	-1.23957	-1.49391	-3.52829	-3.31829	-1.48559	-2.24381	-1.54568	-1.69819	-1.3974	-2.19077	-2.23809	-1.02589	-0.681756	-1.06351	-0.614064	-0.394149	-0.237541	-0.233283	-0.537799	-1.62077	1.60471	1.85886	3.90677	1.2999	1.76909	3.77408	2.52799	0.337418	1.50271	3.03413	2.45602	2.23806	1.56575	1.58855	2.94185	3.09785	2.17003	1.54811	1.7176	3.11385	2.40776	1.17453	1.63878	1.00921	2.44191	2.1668	2.52732
	-1.89293	-0.800283	-1.12512	-0.946462	-1.81564	-2.36863	-2.4263	-1.35193	-1.28903	-1.18381	-0.154205	-0.0645995	-0.0877854	-0.124009	-0.492469	-0.799861	-1.45458	-1.45824	-1.97439	-1.80967	-1.67925	-2.82147	-1.53263	-1.15168	-2.29575	-1.83936	-1.83957	-2.16372	-2.68212	-2.69396	-2.32569	-2.38073	1.81136	2.34599	3.08933	1.31511	2.18465	1.33882	2.47303	2.43422	1.33118	0.175456	0.930747	0.182153	2.82943	2.32919	1.46117	1.62027	0.628361
	-2.4263	-1.35193	-1.28903	-1.18381	-0.154205	-0.0645995	-0.0877854	-0.124009	-0.492469	-0.799861	-1.45458	-1.45824	-1.97439	-1.80967	-1.67925	-2.82147	-1.53263	-1.15168	-2.29575	-1.83936	-1.83957	-2.16372	-2.68212	-2.69396	-2.32569	-2.38073	1.81136	2.34599	3.08933	1.31511	2.18465	1.33882	2.47303	2.43422	1.33118	0.175456	0.930747	0.182153	2.82943	2.32919	1.46117	1.62027	0.628361	0.439374	1.70946	2.50594	1.70783	1.47203	1.68904
	-0.322246	-0.107279	-0.565363	-0.207389	-0.384299	-0.269554	-0.401827	-0.382923	-0.0873577	-0.958598	-1.22558	-0.72102	-0.889328	-0.89126	-0.480422	-1.36615	2.86342	1.69159	0.533165	1.27584	1.17116	0.776267	1.96444	1.45687	1.66175	1.70527	0.640781	0.93807	0.424859	1.19591	1.3268	0.995418	1.58063	0.884459	1.09612	0.708824	1.74711	1.91878	0.807876	1.50711	1.01505	0.824024	0.405104	0.973947	2.39153	1.08346	1.33772	1.56623	2.98958
	1.59388	1.8505	0.834729	1.32026	1.36377	0.536449	1.27599	2.86755	1.53958	0.481233	0.908309	0.655897	0.450614	1.51151	-1.0223	-0.577281	-2.00862	-0.532821	-0.603222	-0.0666907	-3.95529	-2.70609	-1.94996	-2.02397	-1.06982	-2.20059	-2.29827	-1.85835	-0.51669	-0.735414	-0.562706	-0.354038	-0.407876	-1.10146	-1.98407	0.401285	0.185657	0.485688	0.344926	0.560693	0.379884	0.77856	1.5554	2.11723	1.19864	1.53122	1.97755	0.275252	4.33534
	0.77856	1.5554	2.11723	1.19864	1.53122	1.97755	0.275252	4.33534	3.79063	0.571347	1.88385	1.42621	2.11362	2.85895	0.878869	1.12406	0.865793	0.93905	2.11259	1.61048	2.17722	2.99652	1.85057	2.81193	2.08628	0.14314	1.72342	0.584821	1.477	2.44075	2.26028	1.47629	2.18685	0.852893	2.57209	3.67545	2.16136	2.33235	1.96556	0.953059	2.00486	3.23254	2.33636	1.91792	2.50668	2.5621	2.41329	1.6828	1.40766
	1.91792	2.50668	2.5621	2.41329	1.6828	1.40766	2.50072	3.08139	3.41456	2.20606	2.15317	1.79705	2.85298	2.53979	2.24514	2.23728	1.57369	1.04064	1.31014	1.46484	-1.14454	-1.71134	-2.62602	-0.477441	-1.69386	-0.144621	-0.392577	-0.603535	-0.337141	-0.651403	-1.48877	-1.48011	-0.884462	-1.18671	-1.67507	1.77457	2.48621	1.15122	2.75109	0.764646	2.00549	3.3767	1.11963	1.85467	1.79634	1.7783	2.92866	0.668613	0.952551
	-3.26201	-1.84404	-1.02458	-1.71713	-0.833348	-1.25383	-0.767181	-0.152418	-0.314767	-0.994306	-2.86082	-0.610168	-0.876136	-0.0442434	-3.05016	-3.09997	-2.49845	-2.88546	-0.817099	-0.236307	-0.104744	-0.27314	-0.203824	-0.453269	-0.552128	-0.995313	-0.325805	-0.291579	-0.0838654	-1.3086	-0.354939	-0.83398	-1.43594	-0.300334	1.17417	0.967154	0.989345	1.14785	0.367086	2.77551	1.4621	2.12386	2.10686	1.2056	0.501923	2.09356	1.29002	2.25283	2.01987
	1.92418	0.988155	0.641892	1.25239	0.979937	0.116374	0.367713	1.65567	0.630223	0.241248	1.88183	0.276646	0.709442	0.617762	0.183839	1.38696	1.15264	1.63398	2.65322	1.93523	0.653687	1.51067	1.59215	1.74614	3.28944	1.24651	0.924271	0.465894	2.65499	2.5483	2.58797	1.55407	1.11091	0.628763	1.53467	1.60823	1.75547	1.39945	2.03565	2.67018	1.43826	1.76481	2.08754	1.00246	0.924116	1.89426	2.17468	2.86085	0.784885
	1.30232	1.43995	2.4768	1.5755	0.680452	2.26289	2.03923	1.13322	0.679209	1.11995	1.40728	0.855576	1.01648	1.54796	1.10557	2.19054	2.01376	2.69071	1.77712	0.309352	0.438242	1.28062	1.3842	1.76437	1.67379	1.22377	2.18155	2.13403	2.14108	1.22707	0.832462	2.30093	2.44631	1.13098	0.841759	0.778129	0.168591	1.45261	2.31085	2.3303	0.984133	0.338141	0.437278	1.38468	2.00037	2.27861	1.33507	2.01542	0.925396
	1.41756	1.40777	0.760343	0.290836	2.0794	3.59334	3.36777	0.817153	0.108766	2.14217	4.23779	2.52873	0.701661	0.816164	1.28038	2.64488	2.18266	2.04054	2.29141	-1.70269	-1.98392	-1.16519	-2.86571	-2.3452	-0.0602058	-2.04797	-4.39524	-3.44976	-1.42368	-2.57308	-0.116966	-0.99563	-0.382031	-0.26611	-1.16322	-0.321608	0.0719271	2.24475	1.26189	3.71459	2.06592	0.206509	3.19121	1.39611	2.6841	2.11699	1.57679	1.52206	1.92449
	2.18266	2.04054	2.29141	-1.70269	-1.98392	-1.16519	-2.86571	-2.3452	-0.0602058	-2.04797	-4.39524	-3.44976	-1.42368	-2.57308	-0.116966	-0.99563	-0.382031	-0.26611	-1.16322	-0.321608	0.0719271	2.24475	1.26189	3.71459	2.06592	0.206509	3.19121	1.39611	2.6841	2.11699	1.57679	1.52206	1.92449	1.56793	2.61212	1.35126	1.43755	2.08969	2.16098	2.71774	2.06872	-0.113391	-1.06406	-0.375185	-0.188125	-0.265648	0.992842	0.877012	0.426566
	-2.57308	-0.116966	-0.99563	-0.382031	-0.26611	-1.16322	-0.321608	0.0719271	2.24475	1.26189	3.71459	2.06592	0.206509	3.19121	1.39611	2.6841	2.11699	1.57679	1.52206	1.92449	1.56793	2.61212	1.35126	1.43755	2.08969	2.16098	2.71774	2.06872	-0.113391	-1.06406	-0.375185	-0.188125	-0.265648	0.992842	0.877012	0.426566	1.32782	1.1871	1.29048	1.44983	0.750276	0.375956	1.43234	1.28668	0.833223	1.53624	2.22273	1.43465	0.918023
	0.438068	1.36141	1.55919	2.84616	-1.58299	-2.16303	-0.616435	-0.160515	-1.28201	-0.467274	-2.45465	-3.5338	-3.13006	-1.30028	-2.88244	-2.31708	-2.17339	-0.883355	-1.95679	-1.00762	-2.05263	-1.25014	-0.967832	-0.377637	-0.332765	-0.374133	-0.161704	-0.517471	-1.80633	2.79098	0.72129	0.973783	0.870993	0.898142	0.969154	1.43897	0.833402	1.13197	0.933588	0.726816	1.11328	-1.35494	-1.30829	-1.51277	-1.37988	-0.785522	-2.52861	-1.12313	0.965852
	1.3379	1.2945	-0.214547	-1.59259	-0.66434	-1.35834	-0.355262	-2.16975	-2.09041	-1.60716	-1.47954	-1.4555	-0.475898	-0.450317	-1.30756	-2.35386	-2.16906	-1.68066	-0.20133	-0.251045	-0.316479	-0.509399	-0.64453	-0.318929	-0.550503	-0.826861	-1.117	-0.934264	-0.13464	-0.0881598	-0.771572	-0.437968	-0.959334	-0.461936	-2.35751	-0.0969663	-1.63801	0.635766	1.36463	1.15387	1.08322	0.351328	1.0099	1.05307	1.41817	0.867304	0.512968	0.331077	1.84772
	-0.475898	-0.450317	-1.30756	-2.35386	-2.16906	-1.68066	-0.20133	-0.251045	-0.316479	-0.509399	-0.64453	-0.318929	-0.550503	-0.826861	-1.117	-0.934264	-0.13464	-0.0881598	-0.771572	-0.437968	-0.959334	-0.461936	-2.35751	-0.0969663	-1.63801	0.635766	1.36463	1.15387	1.08322	0.351328	1.0099	1.05307	1.41817	0.867304	0.512968	0.331077	1.84772	0.875431	0.574847	1.48722	0.804042	0.0642825	1.19854	1.05034	0.271507	2.0156	1.20067	1.65213	1.54646
	-0.0969663	-1.63801	0.635766	1.36463	1.15387	1.08322	0.351328	1.0099	1.05307	1.41817	0.867304	0.512968	0.331077	1.84772	0.875431	0.574847	1.48722	0.804042	0.0642825	1.19854	1.05034	0.271507	2.0156	1.20067	1.65213	1.54646	0.248244	0.943756	0.632465	3.23245	1.94013	1.84182	2.05763	1.09707	1.91232	2.39362	0.327038	1.51763	1.4162	2.4119	1.16677	-0.543121	-1.73879	-1.98437	-0.245698	-0.738913	-0.522296	-1.22667	-0.774523
	1.05034	0.271507	2.0156	1.20067	1.65213	1.54646	0.248244	0.943756	0.632465	3.23245	1.94013	1.84182	2.05763	1.09707	1.91232	2.39362	0.327038	1.51763	1.4162	2.4119	1.16677	-0.543121	-1.73879	-1.98437	-0.245698	-0.738913	-0.522296	-1.22667	-0.774523	-1.27018	-1.09453	-2.13621	-2.26259	-2.37538	-1.36704	-1.86597	-0.723593	1.41632	1.17299	0.647534	0.162706	1.15607	1.29911	0.186636	1.4183	0.62489	2.14352	0.7642	1.33226
	1.88428	1.84573	1.69873	2.50194	2.36367	1.37482	2.64064	2.19546	2.76087	1.51717	2.6803	2.39193	2.26912	2.93649	2.66221	2.12276	2.48102	2.72486	2.27463	1.89727	1.86155	1.56183	2.8857	2.60142	2.25232	2.38085	1.3038	1.29725	0.793739	1.20209	2.53371	2.08307	1.9582	2.20405	1.89204	1.57147	1.88492	0.650606	2.27267	3.64669	2.01663	-2.08329	-2.14868	-1.97748	-2.24054	-2.39433	-0.917336	-0.668223	-0.889342
	2.08307	1.9582	2.20405	1.89204	1.57147	1.88492	0.650606	2.27267	3.64669	2.01663	-2.08329	-2.14868	-1.97748	-2.24054	-2.39433	-0.917336	-0.668223	-0.889342	-2.06342	-5.35209	-2.90462	-2.19843	-1.27034	-0.946555	-0.809652	-0.217776	-0.169734	-0.108376	-0.159299	-0.702045	-0.894653	-1.60107	-0.356426	-2.10223	2.52907	0.980914	0.270226	1.89448	0.841683	1.94416	2.87105	2.14391	2.67828	2.46379	2.16609	3.96704	0.460842	1.44619	4.12195
	2.51332	2.06537	2.69311	1.9567	0.493148	2.12971	1.49642	1.41434	1.57092	2.66576	1.39986	1.4651	1.77049	3.40249	5.20275	0.245795	1.71717	2.61952	3.28876	1.6946	3.15578	2.78602	1.48337	1.45905	3.23691	2.36366	1.56652	2.273	2.16048	1.61363	2.27706	4.08372	2.96802	1.26866	2.07596	2.3428	1.58633	2.85722	2.10109	2.59187	2.59373	1.13864	2.56869	1.83342	1.24037	-2.29209	-1.86322	-1.69324	-1.80229
	-1.68842	-1.56616	-1.82874	-2.38311	-2.23956	-1.38488	-1.60602	-2.11118	-2.91023	-2.24218	-0.448952	-0.342411	-0.262561	-0.601839	-1.33217	-0.279409	-0.157503	-0.293108	-0.302843	-0.137433	-0.522894	-0.505145	-0.390996	-0.692169	-0.668624	-2.18277	3.34149	2.72152	3.18507	1.63821	1.22741	1.2749	2.48387	3.40844	3.24071	1.25017	1.84914	3.8755	2.64147	2.72408	1.38018	-0.885735	-0.525533	-0.291795	-1.06368	-0.249702	-0.38718	-1.13093	-0.17108
	2.20769	2.94313	3.08623	1.30196	2.00615	2.15944	2.63502	2.6114	0.894659	2.49633	1.74969	3.49853	1.88275	1.24055	1.95767	1.16138	2.69087	2.5397	1.80281	1.773	1.40671	1.02302	1.62659	0.951371	2.05902	1.36492	0.135447	0.291011	1.85283	0.408498	0.528726	0.279753	0.73777	0.616066	1.42537	2.49889	2.90304	2.34501	1.62188	1.30002	1.62561	1.0837	4.81709	0.664275	1.36696	2.43306	0.663527	2.59386	1.21058
	1.62659	0.951371	2.05902	1.36492	0.135447	0.291011	1.85283	0.408498	0.528726	0.279753	0.73777	0.616066	1.42537	2.49889	2.90304	2.34501	1.62188	1.30002	1.62561	1.0837	4.81709	0.664275	1.36696	2.43306	0.663527	2.59386	1.21058	2.74893	1.10393	0.601815	1.36565	1.60279	0.998081	0.781939	1.29911	1.96248	3.60394	1.72159	1.67481	1.95712	1.36769	-2.57696	-1.70266	-1.05764	-0.89531	-0.164759	-0.725049	-0.553085	-0.149153
	-0.586898	-0.099534	-0.380354	-0.441208	-0.404333	-1.82318	-0.505627	-0.937638	-2.06641	-0.166402	1.77321	3.46864	1.09284	0.89345	1.80322	0.957319	1.89961	2.07837	1.53156	2.64451	1.30984	1.75653	1.6529	2.23964	1.56982	2.12887	1.48722	1.13896	1.67249	2.88693	2.68182	0.537306	1.74324	3.23526	2.529	1.29708	1.40823	1.15092	4.20089	2.41476	0.660267	-1.45952	-0.931752	-1.35563	-0.580365	-0.800372	-1.24156	-1.75351	-0.901093
	-2.32069	-0.636017	-0.745611	-1.60851	-0.569161	-0.38108	-1.56777	-2.5447	-2.84649	-4.09812	-1.96005	-1.17536	-1.25686	-1.23555	-0.269435	-0.821003	-0.410203	-0.460069	-2.36426	-3.03072	-1.80877	-2.13886	-2.20609	-1.75214	-3.00735	-1.97717	1.66429	1.61435	1.7255	2.42649	1.54502	2.99562	1.07859	1.9741	0.722524	3.42667	1.6742	1.28039	1.29139	0.656773	0.261534	0.423558	0.358404	0.130894	0.537005	0.641272	0.387196	0.671128	0.814972
	-0.269435	-0.821003	-0.410203	-0.460069	-2.36426	-3.03072	-1.80877	-2.13886	-2.20609	-1.75214	-3.00735	-1.97717	1.66429	1.61435	1.7255	2.42649	1.54502	2.99562	1.07859	1.9741	0.722524	3.42667	1.6742	1.28039	1.29139	0.656773	0.261534	0.423558	0.358404	0.130894	0.537005	0.641272	0.387196	0.671128	0.814972	1.30507	0.831131	2.19113	1.71421	1.99271	1.84126	-2.59655	-1.4276	-1.43371	-3.08755	-1.53899	-1.04552	-1.58101	-1.14646
	0.387196	0.671128	0.814972	1.30507	0.831131	2.19113	1.71421	1.99271	1.84126	-2.59655	-1.4276	-1.43371	-3.08755	-1.53899	-1.04552	-1.58101	-1.14646	-0.333898	-0.74414	-1.23925	-0.45144	-1.26589	-1.02361	-1.08473	0.462711	0.548329	0.543102	0.886229	1.20072	0.76817	1.09895	2.19067	1.4199	2.37144	3.04456	0.826671	1.31082	3.58201	1.27249	3.64435	0.798908	-3.53692	-1.43778	-0.642604	-0.237271	-0.8064	-1.93345	-3.24542	-2.23934
	-1.11047	-1.40574	-0.279904	-0.623678	-0.51566	-0.854621	-0.987842	-0.121067	-0.17822	-1.18253	-1.40467	-3.15963	-0.700724	2.09426	2.72256	1.46552	2.7036	2.47557	1.59496	1.80667	1.57978	2.57915	4.34766	2.40749	0.934429	1.65559	1.30516	3.99387	1.57003	1.34223	1.8937	2.11978	1.43973	1.76517	1.64887	1.09927	1.32109	1.51743	1.29211	1.81255	1.32783	1.07063	1.61877	1.91331	2.89812	1.68169	1.50959	3.50372	-2.77693
	-1.54803	-2.47786	-3.55668	-2.41251	-1.90016	-1.82118	-1.92014	-1.93709	-1.80682	-1.16315	-1.90992	-1.21827	-1.07125	-1.19417	-0.994808	-0.996086	-1.9632	-1.51182	-0.891053	-0.190407	-1.61546	-0.206048	-0.509847	-0.057075	-0.573315	-2.25759	-3.1276	-2.54426	-2.41565	-1.58809	-2.25425	2.93798	0.870735	1.26436	2.29912	3.41227	1.96588	1.4548	2.36759	2.61749	1.12414	2.43952	3.47369	1.42273	1.90762	2.51205	3.66296	2.75588	1.41568
	3.76644	3.85248	1.80674	1.46765	2.51352	1.40746	2.87518	3.92824	2.92414	1.57619	2.19274	4.54099	2.60311	2.67609	1.10864	3.29863	3.14146	3.79645	1.79842	1.9034	2.14522	3.95142	1.81752	1.79231	3.52999	2.11335	1.75352	2.10122	3.87884	2.63778	1.29843	1.50058	2.05974	2.92446	3.10437	1.58595	2.57868	4.76987	2.21746	1.53121	1.8207	-0.228969	-2.52093	-2.38358	-0.986672	-0.303235	-0.571032	-0.623822	-1.77931
	3.10437	1.58595	2.57868	4.76987	2.21746	1.53121	1.8207	-0.228969	-2.52093	-2.38358	-0.986672	-0.303235	-0.571032	-0.623822	-1.77931	-1.13934	-1.39581	-2.12612	-1.43321	-2.88495	-0.911845	-0.34158	-0.348242	-0.0560544	-0.649459	-1.34353	-0.964666	-2.64538	-0.962636	2.6571	4.62585	1.72631	2.37276	2.88105	2.46558	2.21978	2.35449	0.806341	1.83978	2.6965	1.78606	-3.31419	-2.40258	-1.2481	-1.98923	-1.6338	-2.65813	-2.75045	-0.978857
	4.62585	1.72631	2.37276	2.88105	2.46558	2.21978	2.35449	0.806341	1.83978	2.6965	1.78606	-3.31419	-2.40258	-1.2481	-1.98923	-1.6338	-2.65813	-2.75045	-0.978857	-1.46426	-1.39307	-0.299205	-0.594744	-0.317397	-1.13357	-0.783399	-1.97661	-2.22498	1.94549	1.63231	3.38554	1.67513	3.0428	1.63476	3.72531	1.64648	1.32384	1.23637	2.98532	2.03526	2.31208	-1.64246	-0.646252	-2.52092	-2.05249	-0.693055	-0.530356	-1.40519	-0.234009
	-2.20173	-2.21401	-1.32291	-1.845	-1.84378	-1.77803	-1.31303	-1.7381	-1.10575	-1.41233	-1.47556	-1.40975	-1.13875	-1.60615	-1.00038	-0.962191	-1.52092	-1.60561	-1.66617	-0.872511	-0.662191	-1.05574	-0.968719	-0.943828	-1.82126	-0.815198	-0.363123	-0.494925	-0.927132	-0.792364	-0.52759	-0.582498	-0.661172	-3.1453	-2.06448	-2.26026	-0.472297	2.72698	4.53732	1.20395	0.802	0.471829	1.35949	1.98603	0.952442	2.83815	1.40801	1.17437	1.66974
	-1.60561	-1.66617	-0.872511	-0.662191	-1.05574	-0.968719	-0.943828	-1.82126	-0.815198	-0.363123	-0.494925	-0.927132	-0.792364	-0.52759	-0.582498	-0.661172	-3.1453	-2.06448	-2.26026	-0.472297	2.72698	4.53732	1.20395	0.802	0.471829	1.35949	1.98603	0.952442	2.83815	1.40801	1.17437	1.66974	2.8537	0.789693	2.8956	1.99952	1.3178	2.20926	1.60483	1.07136	1.72738	1.85012	1.73064	2.77809	0.786584	1.86081	0.975034	0.896221	0.535946
	1.68164	2.37308	3.06328	2.63191	2.9244	1.68406	1.39918	1.59365	2.88112	2.6556	0.836375	2.26252	2.13595	0.64547	1.17292	2.91422	1.38343	1.54742	2.08362	2.25793	4.14466	2.76027	1.43306	2.24781	1.68945	1.00905	2.08699	3.37691	2.49735	1.71995	1.73599	1.54404	1.34245	1.79823	1.44838	1.80625	1.42127	1.34388	1.43713	3.43342	0.462712	1.45782	0.822428	1.30269	1.24504	1.90518	1.39677	2.38535	0.808905
	1.65808	-1.88977	-1.24065	-0.0432283	-0.565811	-1.56438	-1.24925	-0.032434	-2.40445	-1.74519	-2.50871	-0.877584	-2.999	-2.00113	-0.571972	-1.30574	-1.50695	-1.63232	-0.531834	-0.764675	-0.417468	-0.740621	-0.560358	-0.744608	-1.43451	-1.74923	-1.2864	-1.85582	-1.93888	-0.0967344	0.379346	0.494783	1.33554	3.60717	2.18982	1.37178	0.937911	0.993304	0.946482	1.90837	2.34662	1.64048	3.62968	0.92251	2.70093	3.17524	1.81632	1.76979	1.35801
	-1.92249	-1.51128	-2.4357	-1.16896	-2.38287	-3.06679	-2.30774	-2.3109	-0.95012	-0.995713	-0.942775	-1.82048	-2.77329	-1.97898	-2.03946	-1.56128	-1.80913	-2.04125	-2.08008	-1.21001	-1.80767	-1.43509	-1.31641	-1.51666	-1.20345	-0.811853	-1.29273	-0.495034	-0.111512	-0.44403	-0.230607	-2.5609	2.47438	2.29105	1.93386	2.65648	4.11461	2.22029	0.704087	1.83999	2.70431	3.38467	2.46103	1.55695	1.66262	0.975708	1.73296	1.70689	3.34227
	-1.67179	-0.655568	-0.5338	-0.088079	-0.14503	-0.30255	-1.9578	-2.80659	1.0643	1.80261	4.27995	1.76934	3.37738	2.38781	3.38225	1.30784	1.98944	2.69044	4.69558	2.94146	1.46137	3.30537	1.90916	1.77794	2.2172	1.90547	1.27747	2.82686	2.63283	4.79805	2.10594	-0.697976	-1.61722	-2.51992	-4.22842	-0.83852	-4.74424	3.7541	3.55944	2.05606	2.13356	1.52632	1.54691	1.62875	1.486	1.29404	0.382671	0.552835	0.232282
	1.29404	0.382671	0.552835	0.232282	0.332292	1.12845	3.51341	3.05019	1.71405	3.32091	1.61255	4.20168	3.06467	2.10768	2.19822	2.25322	2.61872	1.49443	-3.74777	-4.38271	-2.25075	-1.22655	-1.75795	-2.74112	-2.90947	-1.7442	-2.85174	-1.60575	-1.77091	-0.487089	-1.3683	-0.500449	-0.49276	-0.54663	-0.505847	-1.3955	-4.15568	3.58699	0.864579	2.44784	1.77595	3.48912	2.34302	0.900593	1.75707	1.96969	1.77352	2.55604	2.41186
	-1.60575	-1.77091	-0.487089	-1.3683	-0.500449	-0.49276	-0.54663	-0.505847	-1.3955	-4.15568	3.58699	0.864579	2.44784	1.77595	3.48912	2.34302	0.900593	1.75707	1.96969	1.77352	2.55604	2.41186	3.02171	2.66504	2.02137	1.17779	1.53002	2.97833	3.29454	1.36415	-0.938861	-0.96701	-2.6839	-4.5219	-0.732286	-3.04794	2.57821	2.69962	4.14123	1.40065	1.55298	0.25311	0.21908	0.677007	0.272723	0.649838	0.976818	1.53156	1.34612
	-1.9594	-1.4908	-0.370972	-0.28879	-0.188177	-0.138007	-0.126044	-0.483908	-0.382371	-0.661952	-0.668474	-0.344156	-0.966236	1.99563	2.09588	1.31989	0.999663	4.13885	1.44658	2.70433	3.14907	2.40069	2.54081	5.09486	1.28506	-0.716946	-1.59122	-0.536014	-0.453945	-0.636372	-0.934819	1.87734	1.25945	2.08726	0.195058	2.20119	1.96099	1.62722	1.2251	1.00769	0.228788	0.0837071	0.129426	0.762805	0.864031	0.628292	2.12176	2.36046	2.75287
	3.14907	2.40069	2.54081	5.09486	1.28506	-0.716946	-1.59122	-0.536014	-0.453945	-0.636372	-0.934819	1.87734	1.25945	2.08726	0.195058	2.20119	1.96099	1.62722	1.2251	1.00769	0.228788	0.0837071	0.129426	0.762805	0.864031	0.628292	2.12176	2.36046	2.75287	3.06124	4.18219	0.457581	2.78889	4.3924	3.62322	1.58598	1.19072	1.2937	1.10469	3.39079	2.10183	3.42772	2.92099	1.76853	1.61125	1.31681	3.19416	4.28423	1.77217
	2.78889	4.3924	3.62322	1.58598	1.19072	1.2937	1.10469	3.39079	2.10183	3.42772	2.92099	1.76853	1.61125	1.31681	3.19416	4.28423	1.77217	2.65075	2.59861	2.04393	3.24388	1.87357	1.14968	0.541799	1.92248	0.557711	1.4184	0.10247	0.130529	2.10933	0.727836	1.2593	1.70262	1.3809	1.34843	1.55659	1.04286	2.33534	1.09344	3.5793	3.52098	1.91025	1.44853	2.2185	3.82261	1.47385	3.17453	1.10258	0.976017
	1.2937	1.10469	3.39079	2.10183	3.42772	2.92099	1.76853	1.61125	1.31681	3.19416	4.28423	1.77217	2.65075	2.59861	2.04393	3.24388	1.87357	1.14968	0.541799	1.92248	0.557711	1.4184	0.10247	0.130529	2.10933	0.727836	1.2593	1.70262	1.3809	1.34843	1.55659	1.04286	2.33534	1.09344	3.5793	3.52098	1.91025	1.44853	2.2185	3.82261	1.47385	3.17453	1.10258	0.976017	1.68967	0.0732813	1.37817	2.05309	2.6674
	1.4751	2.74925	3.97859	1.36337	0.389977	1.3493	5.10838	2.71712	2.52079	2.39002	3.7481	2.28429	2.60964	1.98318	2.85582	3.60571	3.31128	1.32313	1.86116	2.62788	3.31028	2.8702	0.93823	1.03364	1.36178	-0.352022	-1.00896	-1.48119	-2.58726	-2.16818	-2.23681	-1.32269	-0.849572	-1.6828	-1.03226	0.415108	2.28846	2.22093	3.98805	2.065	2.4749	2.55947	2.95458	2.39928	1.54903	1.63619	2.00159	1.35529	1.74941
	0.93823	1.03364	1.36178	-0.352022	-1.00896	-1.48119	-2.58726	-2.16818	-2.23681	-1.32269	-0.849572	-1.6828	-1.03226	0.415108	2.28846	2.22093	3.98805	2.065	2.4749	2.55947	2.95458	2.39928	1.54903	1.63619	2.00159	1.35529	1.74941	2.31965	1.43076	1.0671	0.79729	0.148393	0.228594	0.130285	0.409484	1.06181	2.57866	1.59044	2.57909	1.20804	0.925134	-2.4274	-1.68185	-3.9717	-2.6075	-1.47586	-0.653069	-2.50852	-1.83588
	-1.46082	-1.18865	-1.09431	2.65807	2.88706	2.3538	1.79786	3.10768	3.06885	2.73019	2.27902	2.49899	2.3914	3.05225	1.21278	1.91043	2.54925	2.49097	3.04352	1.33434	-1.87483	-2.7356	-2.62407	-2.91284	-1.53616	-1.06334	-1.69135	0.277521	0.165298	0.0205682	0.265458	0.170466	0.611372	0.958655	1.70899	2.92155	1.71831	2.97772	2.61535	1.04898	1.46472	1.48856	1.4285	1.97281	2.38872	1.38543	0.938117	0.886101	0.181341
	2.54925	2.49097	3.04352	1.33434	-1.87483	-2.7356	-2.62407	-2.91284	-1.53616	-1.06334	-1.69135	0.277521	0.165298	0.0205682	0.265458	0.170466	0.611372	0.958655	1.70899	2.92155	1.71831	2.97772	2.61535	1.04898	1.46472	1.48856	1.4285	1.97281	2.38872	1.38543	0.938117	0.886101	0.181341	0.315471	0.34452	1.07239	0.681507	0.997121	3.8056	2.05979	2.58177	3.05622	2.55907	3.80461	2.29931	3.05204	1.47509	1.24505	4.77174
	2.55907	3.80461	2.29931	3.05204	1.47509	1.24505	4.77174	2.20532	1.50268	1.02377	2.07605	3.00185	3.08883	2.96933	1.5303	3.16682	2.00081	1.61641	3.51823	1.96355	2.62914	1.44065	1.78679	2.95102	2.78619	1.05295	1.34707	1.75027	2.17775	1.93054	2.50632	3.37384	3.4683	0.616214	2.42631	2.57088	1.2466	1.58789	2.0774	2.55208	3.51933	1.56028	2.78238	3.19545	1.693	2.74305	1.79807	1.74903	2.34285
	-1.95944	-1.44835	-0.640477	-0.0412057	-0.947512	-3.04674	-3.247	-4.23322	-1.22917	-1.69787	-1.3336	-1.47802	-1.6094	-2.6255	-2.28325	-1.30118	-0.446939	-0.998313	-0.117481	-0.281111	-0.295957	-0.293337	-1.60172	-1.94496	1.82356	3.47549	3.7297	1.77928	0.67687	1.08344	1.57743	2.71467	2.14469	1.76273	2.49629	1.68234	1.56458	1.34528	2.29173	2.92805	3.23894	4.24547	2.88058	1.34668	1.69427	3.14925	4.16052	1.65925	3.40578
	3.16363	4.14413	0.765513	2.85856	1.53676	2.35277	1.77604	3.21928	0.754139	1.97362	2.75785	3.06922	4.30749	2.31455	1.96668	-1.54335	-4.18474	-2.41712	-1.40384	-1.4623	-1.41217	-1.22451	-2.44294	-2.01649	-0.167387	-0.751785	-0.489392	-0.294861	-0.645623	-1.40575	-1.43415	1.43987	1.97775	3.5624	0.847357	1.56463	1.34704	1.52474	2.33615	1.78959	4.18533	2.51387	2.1816	3.90092	1.60285	1.59204	2.71342	3.33346	3.21273
	-0.563488	-0.4465	-0.418026	-0.515157	-1.34667	-1.79565	-2.42752	-1.07297	-2.69254	-2.52312	-2.3734	-1.971	-1.43669	-0.0303706	-2.07793	-2.53038	-2.20842	-3.36198	-2.1805	-0.783949	-0.473064	-0.734291	-2.05652	-4.99355	-0.884746	-0.819915	-0.940947	-1.3462	-0.35064	0.286774	0.827785	0.614088	2.87469	1.05931	0.143136	0.604808	2.4206	1.85366	1.50024	1.14769	3.07967	1.78838	1.89274	1.48633	2.9207	1.78603	2.68201	1.77368	1.74911
	-4.99355	-0.884746	-0.819915	-0.940947	-1.3462	-0.35064	0.286774	0.827785	0.614088	2.87469	1.05931	0.143136	0.604808	2.4206	1.85366	1.50024	1.14769	3.07967	1.78838	1.89274	1.48633	2.9207	1.78603	2.68201	1.77368	1.74911	2.6806	2.20075	1.97473	2.01409	3.66475	0.910828	2.24707	2.23309	2.63554	3.86488	2.28954	2.05693	2.59786	2.49294	3.50076	2.31871	2.29811	1.80401	2.97817	1.38909	3.31425	3.41798	0.0550304
	3.31425	3.41798	0.0550304	1.60389	2.06885	3.16115	3.05903	1.31979	1.99941	1.59553	2.21489	3.17024	1.78107	1.00333	2.2635	1.16982	2.71484	2.98265	2.37813	2.94149	2.68468	0.126581	0.58202	0.441592	1.77255	1.52928	0.96015	1.52821	1.97829	1.43289	1.18002	1.97838	2.36747	2.24752	3.43714	1.98825	3.15218	1.63562	2.49099	1.96248	0.513217	-1.63512	-2.20947	-1.99412	-1.25969	-0.62722	-0.654886	-0.383476	-0.990143
	1.43289	1.18002	1.97838	2.36747	2.24752	3.43714	1.98825	3.15218	1.63562	2.49099	1.96248	0.513217	-1.63512	-2.20947	-1.99412	-1.25969	-0.62722	-0.654886	-0.383476	-0.990143	-1.44335	-0.42389	-0.716925	-3.15219	-1.63326	-3.10622	-0.830326	-0.282182	-0.62692	-0.767311	-0.708891	-0.992117	-0.435569	-1.96119	-1.89419	2.34968	1.78781	2.10552	1.87401	1.25976	2.59396	2.88585	3.60137	1.85479	1.78892	1.58382	1.28966	2.38256	3.95328
	-0.391216	-0.463424	-0.428209	-0.0750652	-0.919705	-2.32354	-2.11022	-1.61993	2.51573	2.39214	1.38073	2.08973	0.65369	2.46679	2.67115	2.34825	1.88651	0.482748	1.85359	1.08387	1.6751	3.13002	1.62149	1.34601	2.13937	2.93902	0.978918	1.77431	1.8648	1.33648	1.38215	1.02406	1.39354	0.519522	0.424599	2.63668	0.662261	0.572778	1.88928	2.27772	0.681203	0.0952669	0.611386	0.452578	0.464419	0.948964	2.13279	1.16565	2.09869
	0.482748	1.85359	1.08387	1.6751	3.13002	1.62149	1.34601	2.13937	2.93902	0.978918	1.77431	1.8648	1.33648	1.38215	1.02406	1.39354	0.519522	0.424599	2.63668	0.662261	0.572778	1.88928	2.27772	0.681203	0.0952669	0.611386	0.452578	0.464419	0.948964	2.13279	1.16565	2.09869	1.71735	1.28149	1.27464	1.08565	1.68094	1.86963	1.46965	1.71917	0.313168	1.05726	0.357672	-0.924736	-0.875262	-0.309243	-0.3881	-0.133679	-0.71723
	-1.35697	-1.15984	-1.42804	-2.05703	-1.90172	-1.71086	-1.15055	-1.01081	-0.689462	-1.13041	-0.992459	-1.37976	-0.982797	-0.0398265	-0.976514	-0.332836	-0.104199	-0.287112	-0.561162	-2.21567	-2.67828	1.42118	0.493222	4.02374	2.39275	1.15704	1.60101	0.321095	0.945705	0.469277	1.44132	2.03952	0.877235	1.2433	1.27952	2.25223	1.18109	1.54481	2.39504	2.63281	2.26196	-1.80589	-0.775758	-1.15145	-0.409951	-0.37593	-1.25163	-1.93403	-1.27959
	0.250361	0.631634	0.806474	0.930123	-0.574805	-0.725888	-1.10022	-0.751916	-0.934605	-0.300406	-0.71139	-0.86196	-1.96984	-0.740533	-1.03969	-0.839594	-1.08393	-1.21914	-0.426389	-0.933128	-0.311539	-0.0256615	-0.174311	-0.234012	-0.467327	-0.18906	-0.661533	-0.696755	-0.784672	-0.946823	-1.09899	0.444019	0.450688	0.760002	0.614104	0.932874	0.930158	0.412359	1.02425	1.76268	1.66785	1.18536	2.39003	1.87816	0.350613	1.55076	2.29957	0.688177	2.27287
	0.5166	0.959264	0.642886	1.24496	2.33593	0.94514	1.41527	0.816999	0.765571	1.21106	3.09404	1.06268	1.26356	1.15425	1.08533	1.01534	1.09911	1.56321	1.73045	0.965907	1.00229	1.3242	1.89047	1.61461	0.21838	0.920311	1.82224	1.48302	0.828743	1.58876	1.88854	1.22971	0.378252	0.934143	1.18533	1.24393	2.01068	2.33853	1.39299	0.793944	1.44847	-1.81607	-0.633077	-1.21775	-1.04778	-0.318601	-0.77408	-0.142284	-0.579632
	0.225677	0.811811	0.542528	0.345261	1.37938	1.1163	0.0594546	1.30862	1.36472	1.31321	3.03403	2.4106	1.1917	0.698826	0.959803	3.64942	1.25427	0.768306	0.2044	1.04984	-0.746164	-0.468032	-0.850959	-1.85899	-0.530303	-0.1263	-0.436486	-1.13642	-1.24813	1.23883	0.569798	0.614992	1.04692	1.34514	2.32637	3.03784	1.61101	0.96884	0.792463	1.54803	1.41309	-1.49417	-1.48106	-0.766969	-1.37005	-0.495229	-0.355448	-0.233991	-0.413963
	-0.226709	-1.35874	-0.68599	-0.637452	-0.371425	-1.38944	-0.213025	-0.205315	-1.04014	-0.248485	-0.561779	-0.744107	-2.7792	-2.36125	-1.30341	-0.938896	-1.0466	-0.559636	-0.763468	-1.22585	-1.44058	-0.417252	-0.494243	-0.56228	-1.30132	-1.34879	-0.589676	-0.281202	-0.680124	-0.796835	-1.26813	1.90032	1.24346	0.996196	1.49211	1.76429	1.50132	1.48124	0.745294	1.18111	1.25797	1.37709	0.335165	-1.34536	-2.2814	-1.07441	-1.41233	-0.43957	-0.259709
	-0.678247	-0.263761	-1.27857	-1.28712	-0.952867	-0.848724	-0.772219	-0.619121	-0.571651	-0.228067	-0.319883	-0.867445	-0.481164	-0.157897	-0.898811	-1.21898	-0.643901	-1.61049	-0.80649	-0.427986	-0.731524	-0.209355	-0.420147	-1.17408	-0.851054	-1.28991	-0.963082	-0.486	-0.606307	-0.289444	-0.747419	-0.556666	-1.04546	-0.665643	-1.0349	-1.28854	1.17586	0.956107	2.52006	1.92424	1.09379	1.15407	2.33912	1.88714	0.299069	1.99685	2.30489	0.936345	1.38747
	-0.754525	-1.34312	-1.07435	-0.735316	-0.62898	-0.342668	-0.221761	-0.493612	-0.724987	-1.03139	-0.62227	-0.570862	-0.351424	-0.168977	-0.249042	-0.36954	-0.319302	-0.420848	-0.243822	-1.77731	-1.30772	-1.54167	-1.84633	-0.250003	-1.34813	-0.656507	-1.17564	0.127144	1.98862	1.31421	1.07954	1.89897	1.30445	1.74485	1.08935	1.34282	1.42686	2.46497	1.3671	1.37464	1.09891	1.3047	1.479	0.691755	1.48171	0.480671	0.618973	0.688226	1.31338
	1.31421	1.07954	1.89897	1.30445	1.74485	1.08935	1.34282	1.42686	2.46497	1.3671	1.37464	1.09891	1.3047	1.479	0.691755	1.48171	0.480671	0.618973	0.688226	1.31338	0.826244	-0.123676	-0.883528	-0.510236	-0.776325	-0.735715	-0.639847	-0.343346	-0.358944	-0.4862	-1.03861	-0.274065	0.649816	0.451556	1.02955	0.852441	0.458697	0.906598	2.00019	2.01878	1.43896	0.982478	0.350768	0.998843	1.00617	1.60291	0.645882	0.185418	0.46675
	1.44752	1.41343	0.493688	2.40203	1.1593	1.50298	1.05435	-1.6081	-1.25269	-0.876663	-2.03709	-2.02365	-2.6634	-2.45162	-0.835986	-1.07643	-1.52115	-0.461963	-0.148851	-0.307132	-0.793641	-0.143901	1.30364	0.598971	0.285751	0.738465	1.66867	0.558321	0.705465	1.06153	1.59049	1.35396	1.06361	2.27491	1.88668	0.773332	2.29252	1.28706	1.49731	1.70855	0.444125	-1.06115	-1.34778	-1.48166	-0.450983	-0.459419	-0.1093	-0.845695	-1.60911
	-0.43168	-1.66708	-2.19907	-2.80052	-2.11402	-1.09516	-1.28437	-0.979813	-1.66708	-1.67952	-0.928245	-1.84106	-1.25818	-1.02646	-1.28467	-1.0001	-1.07867	-0.768512	-1.49124	-1.21848	-0.46066	-0.22918	-0.12602	-0.129579	-0.260922	-0.325492	-0.221483	-1.12883	-0.836639	-1.69146	0.992068	1.76966	1.88825	2.53165	1.07433	2.10681	1.74769	1.36187	1.15383	1.0301	0.989335	1.47662	2.14786	1.78061	1.43888	1.41951	1.82618	1.72617	1.25638
	-1.28467	-1.0001	-1.07867	-0.768512	-1.49124	-1.21848	-0.46066	-0.22918	-0.12602	-0.129579	-0.260922	-0.325492	-0.221483	-1.12883	-0.836639	-1.69146	0.992068	1.76966	1.88825	2.53165	1.07433	2.10681	1.74769	1.36187	1.15383	1.0301	0.989335	1.47662	2.14786	1.78061	1.43888	1.41951	1.82618	1.72617	1.25638	2.17858	1.52538	0.701867	1.23846	0.990169	0.68778	2.38678	1.95245	1.50517	1.16841	1.72286	2.2481	-1.08181	-1.90539
	-2.06305	-2.48778	-0.130342	-1.49385	-2.67244	-0.553477	-3.00626	-2.82266	-1.31657	-1.55501	-1.31449	-1.31521	-1.80017	-1.20249	-0.663613	-0.752198	-0.620491	-0.363771	-0.236567	-0.404988	-0.648207	-1.12728	-0.867202	-0.766767	-1.1006	-1.38696	-1.71048	1.84717	1.40643	1.4851	1.93165	1.77895	0.482736	0.796629	2.67161	1.98127	1.54559	1.1819	1.51873	1.8009	1.14214	0.972989	0.861692	0.569805	1.79392	0.951627	2.51057	2.04834	1.78791
	1.14214	0.972989	0.861692	0.569805	1.79392	0.951627	2.51057	2.04834	1.78791	1.27723	1.88329	1.08618	0.527805	0.968822	1.50947	1.19263	-0.420324	-0.255672	-0.528177	-0.348478	-0.0902846	-1.29408	-0.489574	-0.458315	-0.627375	-1.08292	-0.653635	-0.468646	-0.712253	0.838017	1.51679	3.7154	2.60119	0.209702	1.23766	1.11037	1.35428	0.314886	0.970328	1.97851	1.74973	1.7924	-2.36543	-1.78881	-1.3233	-1.06956	-1.90144	-0.607702	-0.963822
	-0.698999	-0.840194	-0.363925	-1.46888	-2.75385	-1.06528	-0.481608	-0.749026	-1.28621	-0.470578	-1.45687	-1.89234	-1.32998	-1.16696	-0.650991	-0.171847	-0.0964477	-0.261171	-1.72771	1.15907	0.332106	0.906756	0.828226	0.692631	0.156	0.823583	1.13897	0.586052	0.727687	1.41757	1.3078	1.94963	2.27116	1.66902	1.67909	1.57004	1.78836	0.934418	1.48617	2.06055	1.05694	1.75538	1.7837	0.697713	2.10887	1.10892	0.515243	0.735138	0.588311
	1.97104	1.02255	1.76072	1.44077	1.49656	1.05677	0.884942	1.00948	2.44596	3.20893	1.46741	0.806019	0.869753	1.68015	1.09786	0.969357	1.5063	0.9179	1.23694	1.34551	0.335838	0.237536	0.89037	0.52322	0.48352	0.509316	0.262501	0.971128	0.547029	0.660219	1.29994	0.385718	0.270271	0.878479	0.9812	1.03433	1.02192	1.10968	2.30641	2.03979	1.5172	-1.14321	-1.789	-0.852196	-0.941488	-1.30552	-1.8038	-1.10527	-0.43476
	-0.605953	-1.2952	-0.545949	-0.382101	-0.544845	-0.0873127	-0.498257	-0.89977	-0.910007	-0.495631	-1.58928	-1.3732	-1.92974	-2.16982	-1.5172	-1.21721	-1.26901	-1.07209	-1.01014	-2.01185	-1.62011	-0.669343	-0.413763	-1.15392	-1.18876	-2.1539	-1.16839	-0.557298	-0.440897	-0.350369	-0.167878	-0.204221	-0.695016	-0.1907	-0.136986	-0.826185	-0.185604	1.04241	1.08852	1.10696	1.30324	2.62213	1.5311	1.12455	1.69032	1.2512	1.05079	2.67699	0.786008
	0.708417	1.22427	1.63367	1.27129	1.94446	2.42266	0.702713	3.25092	2.0181	0.256711	0.864813	0.939471	0.88741	1.20262	1.46892	0.569033	0.493019	0.812284	1.1726	1.34461	1.08792	0.455523	0.48544	0.806196	1.42422	0.916762	2.17591	0.997374	1.72655	1.67475	0.554495	1.22547	1.17646	0.820484	1.24349	1.61546	0.946141	1.9085	2.3578	1.79962	0.57318	1.49251	1.30983	0.562282	0.478928	0.718388	0.23624	0.838713	1.91203
	1.21131	1.51178	1.93153	1.81124	1.96323	0.374512	0.994103	1.24476	1.24383	0.509691	1.41028	1.61418	1.48374	2.24998	2.34683	2.27199	0.695365	1.73669	1.22124	1.06289	2.22677	1.11446	1.34721	1.12355	2.65633	0.500484	2.69526	3.26232	0.963918	1.28506	0.77746	1.48024	0.888362	2.26696	1.38213	0.501324	1.36979	0.394452	0.614921	0.656474	0.422742	0.552661	1.0675	1.28587	1.40791	0.463789	1.9302	1.70564	0.885053
	1.29641	1.65533	1.13849	1.97105	1.93907	0.752974	2.4189	0.800083	0.507863	1.03994	0.98093	2.632	2.03138	0.793435	0.739814	0.686098	0.77351	0.667206	1.23262	0.320816	1.27027	1.76155	0.974317	0.336256	0.0213421	1.33908	1.57493	0.330804	1.90447	1.18311	0.810902	0.497367	0.347402	1.40062	2.21958	0.541796	1.20995	1.48882	0.783558	0.603967	0.71489	-0.762928	-1.23859	-1.96318	-2.08416	-0.889909	-0.671781	-0.780945	-0.541336
	-1.08117	-1.05778	-1.56141	-0.172641	-0.593306	-0.322173	-0.486949	-0.547106	-0.914672	-0.363363	-1.75868	-0.737695	-0.544896	-1.39869	-0.868932	-0.721853	-0.183451	-0.391156	-0.40756	-0.154931	-0.605394	-0.764145	-1.3345	-0.676083	-0.521595	-0.627173	-0.51731	-0.602422	-0.929949	2.03623	2.37052	2.35947	0.665751	1.29039	0.652307	0.957164	1.73233	2.08177	2.16452	1.46334	1.23461	0.890534	0.673063	1.36891	1.32677	2.26282	1.82321	0.712267	1.80814
	-0.929949	2.03623	2.37052	2.35947	0.665751	1.29039	0.652307	0.957164	1.73233	2.08177	2.16452	1.46334	1.23461	0.890534	0.673063	1.36891	1.32677	2.26282	1.82321	0.712267	1.80814	1.2691	0.0783856	0.489898	0.188649	1.55654	0.307177	0.676781	0.691034	1.15445	1.43396	1.19553	2.05028	2.11857	0.758095	0.986462	1.76779	2.50766	1.49099	1.0003	0.952439	-0.920806	-1.33524	-2.07448	-1.8157	-1.026	-0.556399	-0.588948	-1.69019
	1.22604	0.911111	0.746485	0.302614	1.55077	0.547387	1.26404	2.31635	1.36063	1.6384	1.10328	1.18009	0.833149	0.764068	1.56267	1.27967	1.15398	1.27179	1.46759	0.450266	0.772757	-1.46302	-1.1477	-1.38158	-1.69172	-0.418871	-0.261117	-1.05754	-1.20684	-0.314517	-2.0015	3.33803	1.72784	1.12404	1.08354	0.787372	1.50892	1.86421	0.407078	1.00421	1.66872	-1.21433	-2.62213	-1.55875	-0.925635	-0.446177	-0.246129	-0.402363	-0.313904
	3.24171	1.39847	1.81255	3.13106	3.14492	1.75725	2.68106	1.36854	2.21142	3.23317	-2.01406	-1.78521	-0.0621505	-1.11119	-0.147856	-0.16467	-0.591791	-1.20194	-0.679445	-2.20039	1.42073	2.62558	0.895734	2.03927	0.740956	0.727868	1.48934	2.1107	3.1367	1.58737	2.15582	1.60687	1.98596	0.734213	1.78066	1.08527	1.2713	1.54621	2.13788	1.76253	1.06963	-1.40675	-0.50896	-3.00427	-0.688609	-0.94663	-0.622741	-0.277683	-0.0554745
	-1.79045	-0.610649	-3.69862	-3.22536	-3.35261	-1.14665	-2.91814	-3.94305	-3.20597	-2.05516	-3.27511	-2.41574	-2.14322	-3.15089	-1.88767	-2.58424	-2.52368	-2.36236	-2.85683	-0.167022	-0.482526	-1.02696	-0.611459	-0.764464	-1.40336	-1.91962	-1.56235	-2.22817	-2.40811	-1.23072	2.10238	1.59181	2.5092	2.39961	1.77418	1.77579	2.06288	1.51006	0.590085	2.10701	2.07788	0.66292	1.44798	0.611951	1.08608	3.27353	0.690246	1.1543	1.81223
	-1.02696	-0.611459	-0.764464	-1.40336	-1.91962	-1.56235	-2.22817	-2.40811	-1.23072	2.10238	1.59181	2.5092	2.39961	1.77418	1.77579	2.06288	1.51006	0.590085	2.10701	2.07788	0.66292	1.44798	0.611951	1.08608	3.27353	0.690246	1.1543	1.81223	2.22698	2.49697	0.159181	1.13647	0.955432	3.37297	2.67312	1.16684	1.01018	1.43406	0.736117	1.84379	2.89123	0.465891	0.892369	0.673891	1.69049	1.15798	1.15852	1.67992	1.24147
	2.5092	2.39961	1.77418	1.77579	2.06288	1.51006	0.590085	2.10701	2.07788	0.66292	1.44798	0.611951	1.08608	3.27353	0.690246	1.1543	1.81223	2.22698	2.49697	0.159181	1.13647	0.955432	3.37297	2.67312	1.16684	1.01018	1.43406	0.736117	1.84379	2.89123	0.465891	0.892369	0.673891	1.69049	1.15798	1.15852	1.67992	1.24147	1.08081	2.83853	0.712632	0.504674	-1.20976	-1.19522	-1.66839	-1.673	-0.585566	-1.34326	-0.284337
	-2.53856	-3.1522	-1.76187	-2.30153	-3.22096	-2.61273	-2.62671	-2.00159	-3.43979	-0.705124	-2.39269	-1.90953	-0.551351	-0.295532	-1.12595	-0.254698	-0.678247	-0.345179	-0.198793	-1.00199	-0.424431	-1.37988	-1.76612	-2.08837	-0.744974	-1.81592	-2.07587	3.74247	1.04727	1.53016	1.43793	3.51856	2.37029	1.87204	1.55466	1.71034	2.08187	2.63775	2.91855	1.52234	1.4507	1.83249	2.57183	2.23343	2.38828	3.26566	1.42344	0.79142	0.995025
	-0.705124	-2.39269	-1.90953	-0.551351	-0.295532	-1.12595	-0.254698	-0.678247	-0.345179	-0.198793	-1.00199	-0.424431	-1.37988	-1.76612	-2.08837	-0.744974	-1.81592	-2.07587	3.74247	1.04727	1.53016	1.43793	3.51856	2.37029	1.87204	1.55466	1.71034	2.08187	2.63775	2.91855	1.52234	1.4507	1.83249	2.57183	2.23343	2.38828	3.26566	1.42344	0.79142	0.995025	1.97178	2.87227	2.59295	1.35829	1.50238	2.18535	1.08719	1.81857	1.76491
	2.63775	2.91855	1.52234	1.4507	1.83249	2.57183	2.23343	2.38828	3.26566	1.42344	0.79142	0.995025	1.97178	2.87227	2.59295	1.35829	1.50238	2.18535	1.08719	1.81857	1.76491	2.2501	0.933508	1.96784	2.78519	0.74979	1.10025	3.09961	1.16394	2.58722	1.62197	1.35665	2.08071	3.81236	2.2008	1.5004	1.87852	0.348752	1.3543	3.10631	3.37815	0.702753	2.19667	2.5453	1.82937	2.54224	1.88186	2.48375	3.25433
	-1.73532	-4.17341	-2.05209	-2.31889	-2.15523	-1.29264	-2.65082	-2.20566	-0.2372	-1.46585	-1.68349	-0.291455	-0.658497	-0.370667	-1.07823	-1.18779	-1.25736	-1.97006	3.36292	1.49716	1.59092	2.22754	2.93963	1.37552	2.9461	1.6342	2.33589	2.45876	2.0038	0.775672	0.7704	0.953302	1.35438	1.2204	0.841434	2.38524	2.03499	2.18221	0.730363	0.995139	0.336864	-1.62409	-1.38043	-1.40379	-0.72038	-2.4247	-2.32801	-2.29041	-1.79183
	1.2204	0.841434	2.38524	2.03499	2.18221	0.730363	0.995139	0.336864	-1.62409	-1.38043	-1.40379	-0.72038	-2.4247	-2.32801	-2.29041	-1.79183	-1.61759	-0.934141	-1.26386	-2.0955	-1.65753	-2.19471	-1.18204	-2.7364	-1.12974	-1.53632	-1.64541	-1.47172	-1.07617	-1.52795	-0.402121	-1.45782	-1.2763	-1.79468	-2.53872	1.6469	2.23025	1.20326	1.35814	1.83764	2.87851	1.78249	2.0385	2.79491	2.02548	0.52343	2.63952	1.13388	0.842148
	3.05184	1.84025	1.08115	1.52703	4.07951	2.21607	1.29052	0.787679	2.12234	1.23518	1.29495	2.70964	1.03765	1.23392	1.70079	4.128	1.95594	0.597621	1.3959	2.74563	1.38134	1.15905	0.842186	1.47876	3.65977	1.22623	1.72508	1.19673	2.28344	1.17203	1.11071	1.78905	3.04712	1.81452	2.42631	2.81958	2.62247	0.852503	1.28407	2.55576	0.88054	0.154794	1.17438	0.991761	0.591048	1.11958	1.09522	1.31835	0.497392
	1.29052	0.787679	2.12234	1.23518	1.29495	2.70964	1.03765	1.23392	1.70079	4.128	1.95594	0.597621	1.3959	2.74563	1.38134	1.15905	0.842186	1.47876	3.65977	1.22623	1.72508	1.19673	2.28344	1.17203	1.11071	1.78905	3.04712	1.81452	2.42631	2.81958	2.62247	0.852503	1.28407	2.55576	0.88054	0.154794	1.17438	0.991761	0.591048	1.11958	1.09522	1.31835	0.497392	-0.9044	-0.49495	-1.44783	-2.30951	-1.96622	-0.782715
	0.154794	1.17438	0.991761	0.591048	1.11958	1.09522	1.31835	0.497392	-0.9044	-0.49495	-1.44783	-2.30951	-1.96622	-0.782715	-2.61818	-1.87753	-1.66368	-1.2409	-2.45736	-1.01244	-0.450096	-2.12587	-1.23765	-3.93086	-1.49374	-2.37053	-2.42885	1.59155	1.29127	3.5682	2.33692	3.11088	1.76355	2.65611	1.60479	2.0694	3.4774	2.04767	1.29782	2.98137	1.98551	-2.11451	-3.1966	-0.863714	-1.41205	-1.45174	-0.298407	-0.267052	-0.327996
	-1.66368	-1.2409	-2.45736	-1.01244	-0.450096	-2.12587	-1.23765	-3.93086	-1.49374	-2.37053	-2.42885	1.59155	1.29127	3.5682	2.33692	3.11088	1.76355	2.65611	1.60479	2.0694	3.4774	2.04767	1.29782	2.98137	1.98551	-2.11451	-3.1966	-0.863714	-1.41205	-1.45174	-0.298407	-0.267052	-0.327996	-0.665085	-1.68241	-2.08	-1.97699	1.66475	1.4195	2.60901	1.86209	2.05365	1.93894	1.13954	3.65969	0.860427	0.965202	1.1362	2.02153
	1.86334	1.97359	0.766648	1.51838	0.983479	1.66887	1.96611	2.2396	2.9297	0.682058	1.46094	2.1183	3.09076	2.12354	1.53202	1.73037	1.58809	0.398965	0.864277	1.0712	2.05268	1.38461	0.716845	0.644852	0.716489	2.55809	1.02469	1.92325	0.742102	0.562835	1.46066	1.92428	2.64644	2.09132	1.71938	2.82904	2.34054	1.95059	0.795123	2.85262	1.3121	2.34091	0.984115	1.80299	2.31313	1.80973	1.48777	1.43651	1.99919
	1.75705	1.11138	2.70117	1.83143	-0.81731	-1.33375	-2.09739	-0.158688	-3.13977	-1.86075	-3.6397	-1.87659	-1.18119	-1.81407	-3.26535	-1.97057	-4.52675	-1.20684	-1.48218	-1.66451	-0.4961	-0.498598	-0.346439	-0.1324	-0.0708331	-0.318052	-1.10435	-0.134747	-0.495512	-0.989965	-1.78595	-2.3171	0.177705	1.8718	1.41016	0.712886	1.62688	0.570756	1.75826	2.77271	2.56157	0.65935	0.730506	2.98326	2.02387	1.05358	2.10869	1.57832	1.29428
	-2.30547	-0.10944	-0.959542	-1.20106	-3.06144	-1.94355	-0.565578	-2.12259	-3.24238	-3.14054	-2.19091	-0.680182	-0.850267	-2.98671	-0.58557	-2.33029	-1.43207	-0.647833	-0.469565	-1.01574	-1.56483	-1.13508	-1.60937	-1.62552	-0.760225	-0.923651	-2.59329	-0.927994	-1.69542	-1.81303	-0.359047	-0.989385	-0.6934	-0.760694	-1.35908	-0.821333	-1.41828	2.38621	3.92271	1.70924	1.97364	1.32802	1.35314	2.04863	1.72753	1.72227	1.61003	1.90053	2.48776
	-0.456019	-1.97763	-4.21895	-3.44278	-0.831158	-2.39638	-3.00495	-2.77555	-3.15001	-1.73369	-1.69067	-2.97355	-4.05451	-0.987856	-0.552684	-0.822523	-0.991575	-0.779631	-0.196963	-0.654108	-2.59239	-1.28437	-2.5162	-2.96235	-2.12224	-1.16354	2.63221	2.34359	2.93681	1.54179	1.92058	1.86124	1.91861	2.87025	2.50849	1.57708	1.76481	2.06356	1.27303	1.20605	0.99147	3.00208	2.52941	1.74617	1.66034	2.16297	2.19381	3.054	2.00693
	2.10135	2.53101	0.527422	1.28545	1.17872	-1.18098	-2.53887	-1.97744	-0.784852	-1.90654	-1.07333	-1.83236	-0.809233	-2.60196	-2.41744	-1.76526	-2.82437	-1.30823	-3.02419	-2.75785	-2.33941	-1.7405	-3.04559	-1.57544	-3.30934	-1.02865	-0.497005	-0.74693	-1.1811	-0.407297	-0.459275	-0.306315	-2.01963	-1.73854	2.19022	3.95635	1.95913	1.76711	1.05562	2.96107	1.99812	2.44655	1.84405	2.04139	2.70752	2.17339	1.42001	1.70729	2.3484
	3.95635	1.95913	1.76711	1.05562	2.96107	1.99812	2.44655	1.84405	2.04139	2.70752	2.17339	1.42001	1.70729	2.3484	0.507876	2.7062	1.92948	1.39471	2.21506	2.37363	3.91795	1.18474	1.3837	1.59578	3.18705	2.04338	0.734132	1.90484	1.53295	2.45667	1.59751	1.58174	1.91355	3.54277	1.28596	2.44377	2.56302	2.96598	1.14966	2.92511	2.57472	1.84095	1.33547	1.68196	2.63497	1.53444	2.25348	0.907641	2.02248
	1.33123	0.910806	2.80345	2.34372	1.66169	2.15899	1.62681	2.24187	2.55912	1.62101	1.65514	1.23178	0.857157	1.59457	3.46019	1.84595	0.424967	2.93325	2.51589	1.50202	2.06107	1.02274	1.49075	-2.36885	-1.35081	-0.688199	-0.709179	-1.43033	-0.579625	-0.383409	-0.322232	-1.73791	-1.58096	2.42406	1.06846	4.07233	1.54925	1.24452	0.836416	3.36849	2.20197	2.22812	2.06016	1.06493	1.30332	2.55055	1.44273	1.36825	2.35622
	-0.206769	-1.46457	-1.26769	-1.95845	-1.63574	1.06515	0.83871	3.4214	2.76941	0.823135	1.76307	2.36055	3.13339	1.20798	3.01717	3.22991	1.05031	-1.53396	-1.94322	-0.769926	-0.534447	-1.41862	-0.12276	0.0954068	0.927496	1.77779	1.84323	2.37687	0.607632	1.54463	3.95733	2.16378	1.21156	0.617581	1.01107	1.83999	2.23937	1.68883	1.484	1.15611	0.924801	-1.90905	-0.205736	-1.4456	-1.49609	-2.0338	-1.80849	-1.13708	-2.9632
	3.11435	1.05013	0.758216	2.42136	3.70812	1.76863	1.6858	1.11654	-3.08127	-3.14247	-1.56093	-0.244401	-0.938884	-3.28456	-3.91967	-1.87308	-1.43826	-2.92703	-3.16074	-2.60847	-1.57455	-1.46727	-0.848279	-1.17456	-0.16952	-0.284582	-0.552502	-1.49588	1.88956	1.04159	3.33124	1.86209	1.61811	1.43292	1.79383	2.4242	2.11193	2.53171	1.21943	2.78036	2.63679	-2.78933	-1.05167	-1.6387	-2.43176	-3.60377	-1.34006	-0.743693	-1.89021
	-1.69251	-0.979249	-0.931646	-2.02599	-0.947828	-1.61534	-2.24368	-0.862293	-1.57727	-1.02767	-0.200835	-1.06104	-2.25796	-1.90382	-0.455993	-0.221134	-1.05913	-1.12626	-2.89167	-2.82245	-2.27288	-1.50285	-0.234222	-0.714113	-0.861495	0.249652	0.78854	0.564325	0.391989	1.42795	2.48565	2.86316	0.668313	1.13944	2.01048	1.21944	2.89309	1.08821	1.26837	2.90267	1.59486	1.35807	0.846841	2.3547	1.58439	2.39591	1.71586	2.77718	1.68008
	2.28625	3.09543	2.90874	2.59978	1.34788	0.749108	3.57619	2.39295	1.6912	4.01385	1.3648	0.42461	4.50628	1.66309	1.59781	2.14436	2.82177	1.7058	2.07362	1.32043	0.427636	0.933544	1.5509	2.94777	1.66044	1.15153	0.665235	1.20483	0.206976	1.72612	1.05838	2.3925	1.35836	0.638019	1.88544	3.33358	1.73378	1.9633	1.31898	1.64144	2.35822	1.13686	2.28603	1.54964	1.76598	3.00861	1.1393	1.64055	1.27722
	-3.0446	-4.54628	-1.7557	-1.18051	-3.12344	-2.13308	-2.50761	-2.99296	-3.56946	-2.44177	-1.72849	-1.12081	-1.28333	-1.54904	-2.03116	-1.0539	-1.24765	-0.749828	-0.548706	-0.102628	-0.608066	-1.30157	-3.02644	-1.24305	-1.17542	1.38146	2.27694	2.76222	2.84077	0.932661	1.44269	1.87685	1.12157	1.1056	1.35892	2.42613	1.15448	1.59445	2.356	1.70028	2.16484	1.67373	1.74235	1.70392	2.62448	1.43846	2.43297	2.38113	2.13452
	-2.90049	-3.17266	-0.832938	-2.14212	-1.25761	-1.73008	-1.2568	-1.948	-0.553629	-2.15874	-1.22469	-2.42706	-3.2781	-3.23334	-2.09214	-1.62031	-1.3117	-0.901214	-0.695203	-0.910235	-1.17838	-1.22924	2.14112	1.07202	2.03991	1.1244	1.57662	2.27535	2.03393	2.09833	3.97938	0.994669	1.999	2.16625	3.11293	1.39209	0.8263	2.15381	3.00347	2.85367	3.12666	-0.512708	-0.116393	-1.07644	-0.796822	-0.668077	-0.505482	-0.27984	-0.48215
	-2.53152	-1.84711	-1.4491	-1.44912	-2.93223	-0.18198	-0.323581	-1.36775	-2.07969	-2.54568	-3.5578	-2.02569	-1.27037	-2.08157	-0.246212	-0.963879	-0.251437	-0.618586	-0.571626	-0.453157	-1.67639	-2.1394	-1.7151	-2.15939	2.02187	2.3767	3.2276	2.23209	1.71107	2.85928	2.26347	2.94977	2.24733	1.92244	1.15639	1.60143	2.81795	0.954527	1.595	3.16343	2.8959	1.41988	2.86325	2.45417	2.71956	0.804113	1.84798	2.01619	2.27751
	2.44656	2.8867	1.62835	1.38888	-2.85821	-2.82008	-1.05754	-0.962823	-0.339428	-2.14541	-1.56262	-1.7045	-2.08113	-1.90327	-0.662641	-0.329685	-1.17696	-3.00889	-2.71939	-2.61427	-3.63217	-2.29963	-1.84718	-0.919558	-3.03211	-2.41413	-1.87238	-2.11345	-0.923234	-0.719794	-0.5623	-0.320555	-0.450146	-0.618195	-2.18118	-2.75181	1.37278	1.43323	2.34732	3.29138	2.29741	2.6295	1.70633	2.1248	3.17967	2.90397	1.8942	1.33478	2.22151
	-2.69168	-3.72171	-0.414882	-0.337501	-1.25571	-0.448887	-2.13717	-0.756934	-3.71723	-2.69069	-3.50376	-0.981128	-2.87956	-4.235	-1.46437	-1.12313	-1.10749	-0.690784	-0.633452	-0.344998	-0.0777994	-1.23631	-1.39816	-2.13003	-2.08862	-2.90706	-1.75478	1.86666	1.32174	2.57214	3.6377	2.03718	2.55479	1.86186	1.60711	2.98534	2.94763	1.84629	0.80873	1.3991	0.755567	1.96818	2.81495	1.01868	1.48684	3.23243	3.71764	1.11172	1.04358
	1.96818	2.81495	1.01868	1.48684	3.23243	3.71764	1.11172	1.04358	0.784304	-2.72185	-2.81293	-1.17522	-0.161422	-0.0584255	-0.420572	-2.53702	-3.55974	-2.58235	-1.52814	-1.89243	-3.26859	-2.7044	-0.891849	-0.339272	-0.796909	-0.35995	-0.368718	-0.976745	-1.5321	1.29017	2.95793	2.71217	2.70195	2.07426	2.63845	2.2056	2.24356	3.08406	1.68264	2.6917	2.89382	1.55763	2.93545	3.05566	2.19028	2.15082	1.84992	1.91779	0.942458
	1.29017	2.95793	2.71217	2.70195	2.07426	2.63845	2.2056	2.24356	3.08406	1.68264	2.6917	2.89382	1.55763	2.93545	3.05566	2.19028	2.15082	1.84992	1.91779	0.942458	2.79296	3.1048	2.91368	2.84339	0.954333	2.36428	3.0564	3.47593	0.737505	1.77412	3.93046	1.38685	0.888548	2.21184	3.2011	2.94782	1.63585	1.52016	2.04159	2.22601	2.60988	1.1725	0.776243	1.29202	2.58214	2.06382	0.349407	1.84759	2.07703
	2.15082	1.84992	1.91779	0.942458	2.79296	3.1048	2.91368	2.84339	0.954333	2.36428	3.0564	3.47593	0.737505	1.77412	3.93046	1.38685	0.888548	2.21184	3.2011	2.94782	1.63585	1.52016	2.04159	2.22601	2.60988	1.1725	0.776243	1.29202	2.58214	2.06382	0.349407	1.84759	2.07703	0.924258	1.73596	1.79541	3.54146	1.29104	2.01025	1.28773	3.27818	0.622536	1.96526	2.18358	2.58568	1.76368	1.74687	3.33912	2.89812
	1.26901	3.72803	3.08665	0.839994	1.56352	3.4101	2.44682	0.521357	2.32185	4.84143	1.40169	0.875186	2.36276	2.51479	3.41643	1.72653	2.57618	1.73281	1.42576	0.507565	0.725516	4.59559	3.62887	1.73784	0.478306	3.68138	2.23742	1.19725	2.16292	2.14462	2.2411	3.22103	2.40429	2.1061	1.80568	2.2743	2.66315	2.52006	2.12801	2.1148	3.22338	1.4928	2.27373	2.78301	2.93359	0.483751	2.21946	4.32434	1.65533
	0.478306	3.68138	2.23742	1.19725	2.16292	2.14462	2.2411	3.22103	2.40429	2.1061	1.80568	2.2743	2.66315	2.52006	2.12801	2.1148	3.22338	1.4928	2.27373	2.78301	2.93359	0.483751	2.21946	4.32434	1.65533	1.55791	2.05417	1.59485	4.28494	1.72345	2.62838	2.46705	1.93285	2.50441	2.4372	2.49934	1.56971	2.79896	2.43381	1.33967	1.57428	3.22119	2.33315	1.77678	2.60702	2.75181	3.34214	0.861184	2.01972
	NaN	NaN	NaN	NaN	NaN	NaN	NaN	NaN	NaN	NaN	NaN	NaN	NaN	NaN	NaN	NaN	NaN	1.4845	2.17598	0.383645	0.356385	0.970341	0.109384	0.0812024	0.413824	0.396217	1.57529	1.1948	1.08611	0.87745	1.15299	0.687312	2.77256	1.47644	2.81095	1.99075	1.87482	1.40638	0.899592	2.6033	1.07035	0.304814	0.178843	1.17246	0.332931	0.339546	0.281859	0.0921515	0.325269
	NaN	NaN	NaN	NaN	NaN	NaN	1.4845	2.17598	0.383645	0.356385	0.970341	0.109384	0.0812024	0.413824	0.396217	1.57529	1.1948	1.08611	0.87745	1.15299	0.687312	2.77256	1.47644	2.81095	1.99075	1.87482	1.40638	0.899592	2.6033	1.07035	0.304814	0.178843	1.17246	0.332931	0.339546	0.281859	0.0921515	0.325269	0.188236	0.467161	1.38716	1.18061	1.89919	3.01163	0.894459	0.441714	1.51915	1.94357	0.405093
	0.687312	2.77256	1.47644	2.81095	1.99075	1.87482	1.40638	0.899592	2.6033	1.07035	0.304814	0.178843	1.17246	0.332931	0.339546	0.281859	0.0921515	0.325269	0.188236	0.467161	1.38716	1.18061	1.89919	3.01163	0.894459	0.441714	1.51915	1.94357	0.405093	0.71453	1.05544	1.05411	0.445178	2.24046	1.17655	0.789704	0.758327	1.73822	1.14056	0.346553	0.759995	-0.663681	-0.359818	-0.802595	-0.678408	-0.261284	-2.27589	-1.97812	-3.17179
	-0.148817	-0.470387	-1.42412	-0.81544	-0.409069	-0.215337	-0.439527	-0.568919	-0.648977	-0.547437	-0.10563	-0.493735	-0.734202	-0.716603	-0.097842	-0.052989	-2.43449	-2.05954	-2.01946	-1.60129	-2.24177	-0.965412	-1.56645	-1.94764	-0.560807	-1.08599	-0.402331	-0.0413084	-0.341062	-0.334171	-0.167983	-1.71825	-1.83192	0.833729	1.22376	1.34184	0.906491	0.680327	1.36327	0.774637	0.0719242	0.330426	0.595707	-0.224126	-0.414648	-0.406231	-0.514758	-0.786616	-0.216188
	-0.305566	-0.466929	-0.792493	-0.747899	-0.149941	-0.329213	-0.191531	-0.313777	-0.284888	-0.0737526	-0.0802846	-0.145344	-0.996983	-0.532373	-1.28356	-0.245784	-0.473582	-0.263654	-0.442581	-1.04178	-1.36641	-0.44744	1.28916	1.14754	1.48759	0.516331	1.21217	1.50182	1.66966	0.951335	0.967531	2.15706	1.05529	1.06881	1.06181	0.673585	2.75469	2.39084	1.7446	1.46949	0.977478	1.38029	-1.17424	-1.65415	-0.0202914	-0.549804	-0.5975	-0.595768	-0.384581
	-0.243737	-0.561541	-0.621272	-0.275983	-0.181751	-0.315506	-0.57928	-0.691854	-1.74156	-1.86899	-2.77651	-1.48017	-0.793716	-0.259651	-1.439	-3.22296	-1.08128	-3.52265	-2.67296	-0.931515	-0.224392	-0.762502	-0.347941	-0.178834	-0.512067	-0.230235	-0.513157	-0.134239	-0.0958229	-0.210135	-0.691255	-0.183086	-0.539268	-0.326981	-0.375264	0.500602	0.767141	0.371629	0.308333	0.550209	0.577572	0.721633	0.660297	0.777841	0.0573954	0.691614	-1.45714	-1.12209	-0.939895
	-2.11619	-1.1998	-0.838833	-1.33042	-3.04849	-2.43038	-1.81304	-0.637303	-1.89265	-0.59698	-0.363763	-2.0474	-2.70143	-0.14727	-0.934965	-0.1428	-0.77625	-1.30909	-0.0615381	-0.917214	-0.406076	-0.850529	0.967259	0.50019	1.65224	1.35639	1.50132	2.62318	1.51835	2.58208	1.53675	0.598437	1.77339	2.71907	2.89455	1.15192	1.96975	0.830767	0.881671	2.43245	0.332445	0.324048	0.98309	2.16184	0.643621	0.622517	0.866125	1.62798	0.954309
	-1.81304	-0.637303	-1.89265	-0.59698	-0.363763	-2.0474	-2.70143	-0.14727	-0.934965	-0.1428	-0.77625	-1.30909	-0.0615381	-0.917214	-0.406076	-0.850529	0.967259	0.50019	1.65224	1.35639	1.50132	2.62318	1.51835	2.58208	1.53675	0.598437	1.77339	2.71907	2.89455	1.15192	1.96975	0.830767	0.881671	2.43245	0.332445	0.324048	0.98309	2.16184	0.643621	0.622517	0.866125	1.62798	0.954309	1.27639	1.02728	0.959115	0.0605408	1.63596	0.912997
	-0.348597	-0.00557515	-0.782352	-0.67821	-1.67195	-2.76556	-2.40702	-1.9317	-2.16604	-2.85024	-2.02429	-0.929796	-1.65495	-0.284901	-0.630468	-0.31205	-0.131766	-0.12483	-0.483964	-0.817007	-1.06998	-1.10724	-0.0644911	-1.3562	-1.0111	-1.71642	-2.12264	-2.37197	-0.383863	1.43553	1.3688	2.53656	2.58452	1.46223	1.53852	0.408138	1.79864	1.47756	2.74622	2.27101	1.28615	-1.37348	-0.508294	-2.06081	-2.15982	-1.21087	-3.2832	-4.08161	-1.52912
	2.58452	1.46223	1.53852	0.408138	1.79864	1.47756	2.74622	2.27101	1.28615	-1.37348	-0.508294	-2.06081	-2.15982	-1.21087	-3.2832	-4.08161	-1.52912	-2.00771	-3.52284	-1.67768	-1.75599	-2.08146	-0.147917	-0.260191	-0.355136	-0.532564	-0.456968	-0.22453	-0.147916	-0.659635	-0.127176	-1.00886	-0.0591053	-1.37519	-0.489908	-0.82864	-2.38029	2.30778	1.76873	1.0075	1.57845	0.43564	1.70657	3.11742	2.46704	0.865649	2.3862	2.25444	1.32622
	2.01783	2.81228	0.75254	1.05875	1.93248	2.5224	2.36303	1.36205	1.55128	1.50052	1.63204	2.78288	0.924982	0.821531	1.95003	2.62298	2.69565	1.02817	0.666453	0.830963	2.51728	3.97825	1.20943	0.791008	1.85024	0.703738	1.82134	3.46533	1.29386	1.12893	0.923637	1.41278	1.5896	1.92845	0.983065	1.7693	2.25078	2.20377	0.818474	2.21575	0.660271	0.164649	1.93296	1.97317	3.03012	0.892365	2.23331	0.741303	1.13406
	0.164649	1.93296	1.97317	3.03012	0.892365	2.23331	0.741303	1.13406	2.42039	2.74089	1.33909	1.31803	1.02965	1.8275	0.487122	1.93566	2.15223	0.641731	1.10692	2.2666	2.25062	0.940748	3.07009	2.49685	1.63641	1.23851	0.860946	1.1382	1.27513	1.9379	3.07962	1.65043	2.24528	0.950449	1.38301	0.700465	1.65422	1.10273	1.11345	0.179984	1.6774	-2.58682	-1.20126	-1.40815	-2.50288	-0.353565	-0.735223	-2.65445	-2.23445
	-0.106202	-1.81594	0.748496	1.91504	1.94108	1.26724	0.668014	0.944055	0.593061	0.673433	2.88703	1.88927	1.99689	2.26785	1.0511	1.30231	2.65146	2.6667	1.33538	2.47404	0.206202	0.65348	0.831916	0.421686	0.704402	0.267567	0.303204	0.39356	0.641884	1.43912	2.04893	1.66043	0.679394	1.69129	2.3211	2.8508	2.94353	0.70958	0.784236	1.52381	2.13184	3.62151	1.48044	1.29435	2.23802	0.753022	2.21967	-1.0432	-1.68525
	-1.1865	-0.950829	-1.49061	-1.17581	-2.10393	-1.05275	-2.19943	1.34415	0.440877	1.51171	1.53504	1.50053	1.71523	2.38567	0.973733	2.43268	0.959592	1.76696	1.32277	0.890377	1.25097	2.08297	1.01175	2.68105	0.816323	1.70505	2.11447	0.735113	0.430009	2.92227	2.16404	0.462522	0.239771	2.17481	1.28758	0.968396	0.663149	0.173974	1.77615	1.27195	2.10307	-1.78317	-0.451618	-1.35594	-3.1536	-1.48066	-1.42865	-1.12642	-0.503633
	1.75354	0.581961	1.11193	0.566555	0.928971	1.25948	1.51884	0.883505	2.06961	0.837827	2.38593	2.18388	0.166498	1.68884	1.27829	2.74168	2.71855	1.69633	1.48625	1.37748	2.32386	1.76457	1.32984	1.16607	3.85278	3.42038	1.01304	0.937492	0.801102	1.75711	3.56561	0.326253	2.52697	3.00133	1.80983	1.67193	1.54328	1.46653	1.03286	2.67295	1.27108	2.74362	2.32078	1.3142	1.09696	2.3549	1.6656	1.87363	2.25631
	-2.46767	-1.78885	-1.2759	-1.91307	-2.47746	-1.71506	-1.91271	-0.677348	-0.186102	-0.239566	-0.229943	-0.865413	-0.321465	-0.0767984	-0.287643	-0.314206	-0.0720792	-0.276844	-0.254474	-0.33887	-1.50092	-0.6438	-0.469359	-1.38723	-0.589987	-1.05597	-2.38376	-0.94747	-1.19535	-0.81381	-0.0285628	-2.31684	-0.504691	-1.44383	-1.18866	-0.500634	0.58012	1.61949	1.46	0.290685	0.407486	0.294152	0.464165	0.71947	0.179011	0.351907	1.28905	0.311503	1.01962
	-0.229943	-0.865413	-0.321465	-0.0767984	-0.287643	-0.314206	-0.0720792	-0.276844	-0.254474	-0.33887	-1.50092	-0.6438	-0.469359	-1.38723	-0.589987	-1.05597	-2.38376	-0.94747	-1.19535	-0.81381	-0.0285628	-2.31684	-0.504691	-1.44383	-1.18866	-0.500634	0.58012	1.61949	1.46	0.290685	0.407486	0.294152	0.464165	0.71947	0.179011	0.351907	1.28905	0.311503	1.01962	1.39077	0.190256	1.13523	0.362219	0.329805	0.367058	1.01203	1.14808	1.12199	1.01157
	1.13523	0.362219	0.329805	0.367058	1.01203	1.14808	1.12199	1.01157	1.84589	0.833068	2.21349	1.7987	1.92033	2.59433	2.4688	1.33398	3.31355	1.05566	2.71309	2.63794	1.86217	2.85807	1.58307	2.15096	1.563	2.88577	1.66907	1.35269	1.19097	2.67788	2.02799	1.6257	3.58006	2.84193	0.991033	1.36551	2.55709	2.38633	1.63448	1.60739	0.616331	0.55786	0.897634	3.34674	1.9674	0.482803	0.554245	1.00151	-0.722767
	0.554245	1.00151	-0.722767	-2.66842	-0.688256	-0.0950046	-0.859471	-0.512837	-0.345816	-0.398334	-1.73605	-2.86642	-2.32001	-2.20634	-2.57494	-2.33263	-2.20235	-1.71329	-0.866262	-0.138417	-0.279049	-0.322843	-0.0668357	-0.33588	-0.43596	-0.137969	-0.268668	-0.60111	-0.265043	-0.54154	-1.5379	-2.01067	0.993301	1.10233	1.71999	2.17488	1.85412	1.30429	1.36898	1.54934	0.478764	0.900802	3.89621	1.50082	0.617698	1.12291	0.234161	0.140197	0.978697
	-0.0950046	-0.859471	-0.512837	-0.345816	-0.398334	-1.73605	-2.86642	-2.32001	-2.20634	-2.57494	-2.33263	-2.20235	-1.71329	-0.866262	-0.138417	-0.279049	-0.322843	-0.0668357	-0.33588	-0.43596	-0.137969	-0.268668	-0.60111	-0.265043	-0.54154	-1.5379	-2.01067	0.993301	1.10233	1.71999	2.17488	1.85412	1.30429	1.36898	1.54934	0.478764	0.900802	3.89621	1.50082	0.617698	1.12291	0.234161	0.140197	0.978697	1.56073	0.369296	0.767163	2.38982	1.38152
	-0.137969	-0.268668	-0.60111	-0.265043	-0.54154	-1.5379	-2.01067	0.993301	1.10233	1.71999	2.17488	1.85412	1.30429	1.36898	1.54934	0.478764	0.900802	3.89621	1.50082	0.617698	1.12291	0.234161	0.140197	0.978697	1.56073	0.369296	0.767163	2.38982	1.38152	0.909508	2.05982	0.72011	1.22837	0.633077	1.6798	1.59599	2.09808	1.43984	0.809975	1.27039	1.13121	0.445991	0.410965	0.492252	0.24701	0.660079	1.35718	0.499072	2.01455
	-1.87442	-1.47369	-1.67533	-1.74195	-0.286075	-0.777173	-0.809238	-0.205977	-0.225847	-0.37977	-0.139701	-0.304074	-0.355537	-0.918703	-0.646538	-1.23541	-0.421427	-0.341919	0.521142	0.63249	1.1958	1.73946	1.33668	0.599581	2.34477	1.24982	1.16016	2.12139	1.77544	0.57765	1.36909	1.76107	0.985589	1.38416	1.82264	2.87439	0.248199	1.33586	2.27793	1.32102	2.49125	1.60856	2.01456	1.89696	0.747894	0.834913	2.58814	-2.51594	-1.52189
	1.32102	2.49125	1.60856	2.01456	1.89696	0.747894	0.834913	2.58814	-2.51594	-1.52189	-1.41265	-1.66265	-0.220314	-1.65421	-0.684403	-2.44888	-0.501411	-2.2577	-3.12418	-3.2319	-2.46868	-1.39505	-1.79944	-1.1197	-0.21044	-0.281475	-0.174115	-0.219489	-0.234752	-0.731463	-0.480209	-0.282994	-0.395577	-0.878034	-0.190995	-1.35296	0.766735	1.40568	0.950553	1.94961	1.50623	0.12013	0.649468	1.93643	2.67866	1.76695	1.20486	3.01877	-1.15636
	2.58814	-2.51594	-1.52189	-1.41265	-1.66265	-0.220314	-1.65421	-0.684403	-2.44888	-0.501411	-2.2577	-3.12418	-3.2319	-2.46868	-1.39505	-1.79944	-1.1197	-0.21044	-0.281475	-0.174115	-0.219489	-0.234752	-0.731463	-0.480209	-0.282994	-0.395577	-0.878034	-0.190995	-1.35296	0.766735	1.40568	0.950553	1.94961	1.50623	0.12013	0.649468	1.93643	2.67866	1.76695	1.20486	3.01877	-1.15636	-2.62271	-1.51693	-0.0756846	-0.123025	-0.476783	-1.21341	-2.17767
	-1.74033	-0.427774	-1.23624	-0.343889	-1.13384	-2.64019	-3.56561	-1.10485	-1.60775	-1.32457	-0.806524	-0.422914	-0.600878	-1.69718	-0.638969	-0.263101	-0.565489	-0.309262	-0.248788	-0.251358	-0.247863	-0.251182	-0.593352	-0.205466	-0.376416	-1.55361	-0.983983	-2.36394	2.00715	1.75488	1.07346	1.83678	2.51358	0.370996	0.463942	1.41214	0.800165	1.29053	1.24373	2.03105	1.7396	-2.09777	-0.173078	-2.25383	-0.360089	-0.233632	-1.98461	-1.41593	-0.527667
	-1.1713	-0.956405	-1.13322	-0.889526	0.496359	0.403394	0.146522	0.400064	1.09301	1.14799	2.25417	1.02478	1.08063	1.68826	1.89104	1.35028	1.7654	3.05755	1.12984	2.14046	2.72608	1.41113	1.64325	1.35198	2.3938	1.92129	1.01294	2.16393	1.20583	1.39921	1.70199	2.5604	1.23076	1.71458	2.10303	2.25947	0.271768	0.956904	1.276	0.956022	0.531379	1.24774	2.09039	2.33649	2.10164	1.09848	1.3997	3.12975	1.40599
	1.02478	1.08063	1.68826	1.89104	1.35028	1.7654	3.05755	1.12984	2.14046	2.72608	1.41113	1.64325	1.35198	2.3938	1.92129	1.01294	2.16393	1.20583	1.39921	1.70199	2.5604	1.23076	1.71458	2.10303	2.25947	0.271768	0.956904	1.276	0.956022	0.531379	1.24774	2.09039	2.33649	2.10164	1.09848	1.3997	3.12975	1.40599	0.906439	1.77191	0.684403	1.51103	2.94482	2.07492	2.14194	2.35339	1.67972	1.70372	1.81429
	2.25947	0.271768	0.956904	1.276	0.956022	0.531379	1.24774	2.09039	2.33649	2.10164	1.09848	1.3997	3.12975	1.40599	0.906439	1.77191	0.684403	1.51103	2.94482	2.07492	2.14194	2.35339	1.67972	1.70372	1.81429	2.81492	0.836762	1.61193	3.02545	2.36625	1.70511	1.2882	0.782144	3.18373	2.60448	1.7972	0.991423	1.17437	0.776858	3.18806	3.25681	0.441734	1.92505	2.8109	1.83373	0.620413	3.62765	2.50283	1.67322
	1.83373	0.620413	3.62765	2.50283	1.67322	2.25229	1.79776	0.882669	2.2043	1.26809	2.63843	0.534796	0.21175	3.8491	1.20257	1.72648	2.67606	1.27259	1.9457	1.24755	3.94911	2.69741	0.908306	1.13198	0.501215	0.350598	1.13433	0.397153	0.704952	0.517132	1.99391	1.56247	1.73438	1.52005	2.80009	0.569217	1.09335	0.938299	0.833627	0.208633	1.33989	0.35785	1.44771	2.70198	1.27803	0.226749	0.0748565	-1.03035	-0.880489
	1.79776	0.882669	2.2043	1.26809	2.63843	0.534796	0.21175	3.8491	1.20257	1.72648	2.67606	1.27259	1.9457	1.24755	3.94911	2.69741	0.908306	1.13198	0.501215	0.350598	1.13433	0.397153	0.704952	0.517132	1.99391	1.56247	1.73438	1.52005	2.80009	0.569217	1.09335	0.938299	0.833627	0.208633	1.33989	0.35785	1.44771	2.70198	1.27803	0.226749	0.0748565	-1.03035	-0.880489	-0.597172	-1.54193	-1.27615	-1.31652	-1.19815	-0.849064
	-1.04705	-0.50744	-2.09998	-3.88152	-0.790388	-2.9665	-0.804404	-1.34919	-2.4049	-1.83391	-2.51263	-0.798413	-0.911764	-1.33047	-1.10401	-0.69782	-1.01183	-0.560124	-0.865503	-0.637224	-0.575628	-0.115535	-0.21105	-0.122785	-0.0436709	-0.7912	-0.470133	-1.23409	1.84566	0.589161	1.27074	1.21238	1.12936	0.282761	2.61968	2.80895	2.19526	2.10523	0.567222	1.68065	3.76593	1.23253	1.69088	0.945747	2.04408	2.80274	-0.440579	-1.77393	-1.2394
	1.5017	2.50446	1.2203	0.649568	0.184549	0.617582	0.629012	1.18965	1.70267	1.80274	0.191551	0.623501	2.43301	1.05575	2.28406	1.49415	2.05636	1.46198	1.50467	2.04391	2.43411	0.738225	4.23912	3.17125	0.877155	1.74494	2.11536	1.8869	0.868017	0.811134	1.37724	1.07861	1.11745	2.11752	0.483374	1.37412	0.74838	2.57016	2.07682	2.00577	1.55527	-0.934953	-1.8129	-1.24692	-1.70068	-3.11268	-0.84712	-0.296879	-0.268858
	-1.15656	-0.503019	-2.91556	-2.274	-2.41975	-1.23164	-2.38138	-1.30806	-0.745195	-1.73229	-2.38609	-1.79029	-1.96192	-0.936268	-0.481284	-0.344976	-0.66913	-0.368284	-0.620916	-0.372337	0.376875	0.389341	0.0657802	0.325645	0.750395	1.66268	1.14277	0.44668	1.92975	2.47022	3.12016	1.40662	0.769156	2.033	1.56722	3.02022	2.02401	1.89902	1.23619	1.93948	1.33933	-1.54353	-0.95763	-2.45196	-2.84557	-0.708841	-0.523925	-0.169063	-0.345954
	0.288364	2.399	2.18445	1.37223	1.06239	0.629851	0.854722	3.81712	1.63243	1.05079	2.46562	1.87764	1.8268	1.52907	3.39691	1.61531	1.44867	2.00326	3.66674	0.618843	0.737724	1.37865	1.64943	1.31051	3.23478	0.755066	0.392904	0.712731	0.606324	1.40281	1.30612	3.14371	2.40923	2.16735	1.93489	1.9228	3.77574	1.11144	2.27892	1.17452	0.366213	0.912077	0.424061	0.268972	0.276597	0.387717	0.209208	0.184014	0.183801
	2.53563	3.88362	0.948774	0.346683	1.72774	1.66665	1.90471	1.27501	1.46482	1.66001	-3.09499	-1.00433	-0.256345	-2.24172	-0.409149	-0.212155	-1.21563	-1.72594	-0.886652	-1.52743	-2.45728	-1.75741	-2.44253	-1.38305	-1.85402	-1.50859	1.69608	3.60726	2.07812	1.81253	2.77099	1.48731	1.44619	2.16855	3.29593	4.34351	0.740892	0.645667	1.73544	1.27024	2.39977	-2.09271	-0.901957	-1.59698	-0.418796	-0.905826	-0.619664	-1.12068	-0.922499
	1.81253	2.77099	1.48731	1.44619	2.16855	3.29593	4.34351	0.740892	0.645667	1.73544	1.27024	2.39977	-2.09271	-0.901957	-1.59698	-0.418796	-0.905826	-0.619664	-1.12068	-0.922499	-0.246216	-0.655314	-2.43112	-1.3965	2.11748	1.05125	1.24413	1.81369	2.6364	1.84985	1.78419	2.68673	0.316487	1.04003	0.74094	6.15315	1.40329	0.928028	1.62668	1.77167	1.54156	1.86316	3.06875	3.5441	2.01861	2.20777	1.74638	3.48365	1.36344
	1.27024	2.39977	-2.09271	-0.901957	-1.59698	-0.418796	-0.905826	-0.619664	-1.12068	-0.922499	-0.246216	-0.655314	-2.43112	-1.3965	2.11748	1.05125	1.24413	1.81369	2.6364	1.84985	1.78419	2.68673	0.316487	1.04003	0.74094	6.15315	1.40329	0.928028	1.62668	1.77167	1.54156	1.86316	3.06875	3.5441	2.01861	2.20777	1.74638	3.48365	1.36344	1.43892	1.72728	-1.37013	-1.20979	-0.671301	-0.0603914	-0.772229	-0.623013	-0.892656	-0.340837
	-1.00712	-0.674875	-0.816039	-1.41732	-0.903544	-0.648391	-1.64965	-2.22756	-1.39792	2.03812	2.58051	2.07156	2.52526	2.53964	1.92764	0.918243	2.98328	3.97079	2.2279	1.12188	1.91385	3.71005	2.76064	1.6421	3.16283	3.07768	2.93908	1.87983	2.27591	2.99907	1.79923	3.37092	2.64973	1.98026	3.18279	3.14229	1.91577	2.30146	3.26971	1.56063	2.22695	1.01851	0.466919	1.22717	1.62082	1.91095	0.875817	1.80401	2.32102
	2.84967	1.84469	1.09762	1.49086	3.85928	2.12361	-0.588413	-3.08134	-2.88388	-4.09473	-1.75273	-0.49392	-0.888548	-2.77654	-2.97249	-2.07265	-2.44249	-2.97832	3.36251	2.99044	0.709112	2.40366	2.03029	1.10902	1.54741	1.02735	1.16096	2.12518	2.27567	2.4714	1.02304	0.311837	2.12003	2.09745	3.20684	2.74236	1.53487	2.28741	2.93625	1.55089	1.26368	0.332095	3.67038	-2.16165	-1.947	-1.22691	-1.35061	-1.78033	-0.787496
	2.12518	2.27567	2.4714	1.02304	0.311837	2.12003	2.09745	3.20684	2.74236	1.53487	2.28741	2.93625	1.55089	1.26368	0.332095	3.67038	-2.16165	-1.947	-1.22691	-1.35061	-1.78033	-0.787496	-1.20571	-1.5519	-0.123148	-0.494	-1.48011	-1.56887	-2.16527	2.26448	3.8717	1.93768	2.68563	2.07044	3.67734	1.46274	1.77	1.82024	1.77451	1.47576	0.105898	0.935806	-0.492092	-2.88871	-2.01342	-3.22902	-0.943667	-0.571656	-0.683887
	3.67734	1.46274	1.77	1.82024	1.77451	1.47576	0.105898	0.935806	-0.492092	-2.88871	-2.01342	-3.22902	-0.943667	-0.571656	-0.683887	-0.697592	-1.05619	-1.27647	-2.32534	-1.86859	-1.03701	-0.486421	-1.29719	-3.73437	-6.00087	-1.17758	-1.83984	-1.21445	-3.39067	-1.36509	-2.41075	-0.144977	-2.51784	-5.36591	2.43135	3.65634	1.44805	2.43459	2.53148	3.05794	2.24688	2.46839	1.07927	3.4384	1.33146	2.99007	1.05628	0.795203	2.33971
	-2.02782	-2.15609	-1.78492	-0.335381	-1.49525	-0.320892	-0.362864	-0.245118	-0.52926	-2.67751	1.54888	1.97761	2.92144	2.97036	1.89409	1.21383	1.63414	3.70644	2.26216	0.876261	2.50617	1.46303	2.08681	4.11933	1.67619	1.79473	1.09981	2.2215	3.63519	2.38862	1.22762	1.87575	1.73927	2.33573	3.2507	2.47444	1.21162	2.09031	3.9932	2.56551	1.28767	2.85573	1.66498	2.50483	1.72413	0.975309	3.78291	2.16749	1.41962
	1.41962	1.95707	2.64472	2.05865	3.29335	1.99455	1.93493	2.97101	3.41868	0.717515	1.42163	4.77345	2.20634	1.98682	2.68813	3.3802	2.62068	1.37349	2.55509	1.90232	2.86539	1.38801	3.58913	2.65765	3.97001	1.46349	2.74819	3.84582	2.16232	2.61004	3.17551	1.69497	3.09885	2.62888	0.9068	3.58491	3.59414	1.74022	1.49419	3.41192	2.55619	1.15986	2.04322	1.0149	1.61189	0.253578	2.72321	2.59396	3.58869
	-1.45599	-2.99259	-3.07607	-3.36337	-2.63566	-2.28817	-1.69336	-3.49431	-1.96206	-1.86434	-1.93118	-1.24673	-0.285899	-3.65984	-1.34131	-3.53498	-3.39043	-1.27015	-1.59514	-3.28795	-1.16798	-0.902829	-1.27547	-0.236114	-0.420235	-0.428578	-2.54221	-3.22792	-2.04952	-0.700352	-0.888288	-0.809914	-0.484929	-1.40087	-2.81056	-2.92095	1.71667	1.82737	2.93499	2.65128	2.77372	4.36207	1.51402	2.78773	0.979881	2.68803	4.11564	1.24701	2.99615
	2.77372	4.36207	1.51402	2.78773	0.979881	2.68803	4.11564	1.24701	2.99615	1.85584	2.39781	2.12711	5.57658	4.071	1.14575	2.06005	2.3209	2.1794	3.74855	1.29629	0.890592	2.42286	3.59093	1.79803	1.33749	3.16192	2.56744	1.51486	3.46257	1.83604	1.37729	2.30895	1.85229	2.16029	1.7449	2.24681	3.83748	1.95302	2.78048	2.19894	1.4998	3.63508	2.91299	0.682396	0.685817	2.71383	2.06207	1.99766	1.03849
	2.56744	1.51486	3.46257	1.83604	1.37729	2.30895	1.85229	2.16029	1.7449	2.24681	3.83748	1.95302	2.78048	2.19894	1.4998	3.63508	2.91299	0.682396	0.685817	2.71383	2.06207	1.99766	1.03849	2.32998	3.43829	2.0563	3.68418	3.48466	2.1296	2.12414	1.76718	3.67422	2.07648	0.316954	1.26004	1.89876	3.04708	2.70236	1.63663	0.919393	1.63616	1.51421	2.95633	2.93422	1.91578	5.15215	2.63254	1.30842	3.40535
	NaN	NaN	NaN	NaN	NaN	NaN	NaN	NaN	NaN	NaN	NaN	NaN	NaN	NaN	3.40203	2.04781	0.792842	1.57975	3.37565	3.86048	0.868348	1.51491	3.6811	2.33144	0.439346	2.01254	3.11496	2.21693	2.2204	1.1096	2.26377	2.44594	1.71916	1.62254	1.70556	0.782749	2.15028	2.20483	0.760824	0.644037	1.16727	0.593597	0.358919	0.319027	1.11013	4.19859	2.65134	2.0981	1.45018
	0.593597	0.358919	0.319027	1.11013	4.19859	2.65134	2.0981	1.45018	3.16691	1.40655	1.61182	1.86182	0.238081	1.35945	3.57769	1.59637	1.5765	1.31035	1.59007	0.480158	1.79368	1.32014	2.85671	2.04284	2.42371	2.21372	2.62319	2.56288	1.61904	3.56644	2.21381	1.65935	0.521372	0.895704	1.14349	5.33193	2.80366	1.43657	2.1608	2.11561	3.50653	2.98935	3.04089	3.14738	2.83248	1.37724	2.42415	2.1865	2.82758
	1.67723	0.946015	2.05108	2.02011	1.94844	1.0408	1.67444	3.07687	1.06421	1.44249	1.00939	1.21676	1.29801	2.80692	2.48857	2.50584	-1.21397	-1.20303	-2.68856	-1.12583	-0.81165	-0.797852	-0.322146	-1.33775	-1.27627	-0.847308	-1.79486	3.31355	1.82019	2.91284	1.8681	2.04888	1.07141	0.834593	0.67307	1.86307	1.38437	1.31417	1.63101	0.549032	0.765012	-0.635799	-1.39603	-1.54867	-0.853165	-0.433869	-0.907799	-0.222852	-2.01592
	-2.24707	-1.53873	-5.18561	-2.40456	-1.92444	-0.837883	-1.01714	-1.7123	-3.12554	-1.8976	-1.3124	-1.56911	-1.88857	-2.41937	-2.08506	-1.84327	-2.25575	-3.38589	-2.51922	2.25124	1.89501	2.70794	1.56839	3.17411	1.9461	1.58491	1.89426	1.08946	1.26104	1.41145	2.79737	1.06519	1.17238	1.49468	0.973599	1.0078	2.10773	1.45771	1.12435	1.29982	1.11459	0.314454	0.747928	1.46774	1.31313	1.25376	1.00574	1.41022	2.27624
	-2.41937	-2.08506	-1.84327	-2.25575	-3.38589	-2.51922	2.25124	1.89501	2.70794	1.56839	3.17411	1.9461	1.58491	1.89426	1.08946	1.26104	1.41145	2.79737	1.06519	1.17238	1.49468	0.973599	1.0078	2.10773	1.45771	1.12435	1.29982	1.11459	0.314454	0.747928	1.46774	1.31313	1.25376	1.00574	1.41022	2.27624	3.15266	2.26156	2.76687	0.525981	2.64269	0.903549	1.80883	-0.712873	-0.653095	-0.221772	-0.719117	-0.126765	-0.510187
	1.29982	1.11459	0.314454	0.747928	1.46774	1.31313	1.25376	1.00574	1.41022	2.27624	3.15266	2.26156	2.76687	0.525981	2.64269	0.903549	1.80883	-0.712873	-0.653095	-0.221772	-0.719117	-0.126765	-0.510187	-1.11282	-1.95455	-0.954446	-0.314957	2.00416	1.56785	2.79151	1.50454	1.09575	0.971321	2.06069	3.37477	1.76498	1.35268	0.891652	1.72093	2.1974	2.01048	-1.28422	-1.96619	-1.72848	-1.011	-0.650003	-0.650742	-1.61078	0.262251
	2.1974	2.01048	-1.28422	-1.96619	-1.72848	-1.011	-0.650003	-0.650742	-1.61078	0.262251	0.144856	0.190859	0.358591	0.238332	0.665592	0.360542	1.89943	1.64031	1.72531	3.05961	1.21673	1.49504	1.20556	1.36364	3.11755	2.68135	2.03685	0.782894	2.3658	4.43095	1.0872	1.55951	0.746613	1.8303	2.57016	0.534764	1.42517	1.28737	3.43073	1.14727	0.997468	2.78551	2.8898	1.46682	1.34755	1.92531	1.47865	1.53764	1.75415
	-0.110651	-0.00910405	-0.0259215	-0.0245631	-0.142146	-0.874552	-1.55132	-0.741054	-1.16152	-2.92835	-3.86273	-1.71308	-0.949671	-3.72379	-4.05833	-1.00462	-2.98967	-3.10835	-1.69024	-0.74416	-2.71795	-1.62438	-3.07256	-1.309	-1.37862	-1.19978	-0.346842	-0.331075	-0.8707	-1.71238	-1.73843	-1.93	0.805747	1.06673	3.80271	3.31142	2.90121	1.65179	1.9995	3.68694	2.4045	3.65623	2.46474	1.36635	1.88806	3.63023	2.50554	1.59466	2.20844
	0.89647	2.63149	1.47389	2.61856	1.91204	1.31546	0.733003	1.92147	1.31376	2.9157	-0.88708	-1.62902	-1.44134	-0.584923	-0.757662	-0.291753	-1.29955	-1.65167	-2.21181	-5.30579	-2.51064	-1.16521	-1.80008	-0.660657	-2.08722	-2.48619	-0.451365	-0.631064	-0.946699	-0.503518	-0.441936	-0.366787	-1.08418	-1.84855	-1.27072	-1.00173	-1.41858	1.51568	1.70474	1.19594	1.80837	1.76124	2.19671	0.957809	1.04624	1.27891	0.78594	0.367756	1.05292
	2.64498	2.00489	2.30504	3.29537	2.25038	1.93585	2.11473	2.4218	2.65708	1.82946	3.65171	3.32396	2.10243	3.40944	3.0765	1.81631	1.56044	1.64481	1.87296	2.76961	2.41565	2.6269	2.77893	4.4688	2.09622	2.95661	2.27785	2.56405	2.16089	1.33815	1.05017	1.955	1.35548	1.48417	1.61941	1.20391	0.756543	0.262569	1.55579	2.64764	2.21715	2.51728	2.11648	0.642502	0.0247884	1.60478	1.25527	1.68995	2.03273
	4.95025	1.79569	1.52795	2.50165	0.823977	2.71154	2.222	3.31602	1.19082	1.37201	2.88242	4.13079	2.13765	1.70162	2.98813	3.9893	2.28498	2.36686	-4.20923	-1.54297	-1.97669	-1.51877	-2.46871	-2.90652	-1.26958	-1.57214	-0.653738	-1.01541	-0.768978	-0.439603	3.3361	4.89188	1.30003	1.9032	2.56592	2.42111	2.48599	1.39123	2.98955	2.11084	2.1098	-2.27568	-0.804222	-1.33448	-0.824775	-1.2869	-2.09301	-4.53088	-1.24173
	1.37201	0.0535248	0.91864	2.80197	2.24988	2.25878	1.63671	0.379906	1.23898	1.67637	4.0395	1.68811	1.86345	0.679229	0.348754	0.42126	0.249292	1.50083	0.263355	0.55542	1.48101	1.54651	2.41198	1.74837	2.37111	1.97655	2.19205	2.05042	0.815347	2.43768	1.55599	2.32041	2.09404	1.45462	2.31319	1.76245	1.33427	1.77869	3.13195	1.75789	0.777631	2.11166	2.52047	0.917936	1.7607	2.94636	2.32326	2.11311	1.6915
	2.05819	-1.36133	-3.64788	-1.27802	-1.07137	-1.15701	-0.220072	-0.638921	-1.06655	-1.15892	-3.78245	-5.10941	1.68115	2.32157	4.74523	2.66772	2.46431	3.46966	4.62847	2.22198	2.3707	1.92543	1.80622	2.26874	2.38245	3.21121	3.21773	3.25757	1.91554	2.67449	3.20609	2.93911	1.97681	1.87567	2.46455	2.66568	2.07344	0.459776	0.626329	0.092479	0.740164	-0.294565	-1.88729	-1.57334	-1.31158	-2.32188	-0.550672	-2.49452	-1.72623
	-2.96902	-1.72344	-1.0255	-2.45498	-4.53303	-1.82373	-1.83184	-2.10202	-2.38459	-2.46804	-1.45712	-2.60488	-1.73949	-1.44608	-0.365154	-0.631257	-0.350604	-0.943537	-2.2158	-2.23661	-2.42241	-1.34017	-0.395369	-0.483525	-0.45554	-0.702931	-0.917946	-2.04633	1.91535	3.15883	1.85495	3.45962	3.16125	2.59295	2.32697	3.55095	2.58626	2.61338	2.51937	5.29291	2.13356	3.14091	2.00612	3.40465	2.7969	3.00641	2.40296	1.17467	1.98314
	-5.50904	-2.7663	-2.21855	-1.77285	-1.99752	-2.52313	-3.2465	-2.25883	-0.810138	-0.396517	-1.37136	-2.68617	-3.03857	-2.63759	-1.60108	-1.57229	-2.70797	-3.60915	-1.77804	-1.17565	-0.482751	-0.566249	-2.2867	-1.63054	-0.681956	-0.853105	-1.2355	-0.529011	-0.164329	-0.158339	-1.7037	-1.00136	-2.2974	-3.07548	5.14292	1.68031	2.73681	3.53601	3.59607	2.47831	2.33884	3.48344	3.5038	1.21027	3.27745	0.993276	2.40848	1.34304	2.35215
	1.21027	3.27745	0.993276	2.40848	1.34304	2.35215	2.76299	1.78362	3.12839	1.89292	2.42031	3.16686	2.40311	2.35476	2.16751	2.7043	2.5872	3.87924	3.20405	2.17857	2.00478	2.2266	2.45326	3.2965	2.45222	1.38611	1.68303	2.08576	2.75145	1.51289	3.2138	2.33511	2.26765	1.56955	1.91342	1.41663	2.07451	1.87418	3.02727	2.03193	3.55703	-1.34601	-2.51806	-2.52159	-2.41283	-1.59573	-0.498779	-0.169459	-0.446858
	2.75145	1.51289	3.2138	2.33511	2.26765	1.56955	1.91342	1.41663	2.07451	1.87418	3.02727	2.03193	3.55703	-1.34601	-2.51806	-2.52159	-2.41283	-1.59573	-0.498779	-0.169459	-0.446858	-0.666529	-0.460256	-0.104969	-0.191944	-0.0163865	-0.156887	-0.33133	-1.00022	-2.40984	1.01282	2.76711	1.30751	1.52954	0.873832	1.91839	2.62542	2.77775	2.76304	1.36435	2.14588	1.66177	3.75002	2.85076	3.2777	2.13495	2.41445	1.58589	3.63892
	-2.41467	-1.55838	-1.25321	0.733055	3.52998	2.88786	0.666228	0.299253	2.39648	0.141607	0.706766	0.7388	0.945691	1.15593	1.39488	1.18253	1.68376	3.95689	2.81459	4.09088	2.57636	1.77147	1.51703	3.15998	2.09812	3.14785	2.59527	1.10125	2.42232	1.76592	2.38703	0.948215	0.882814	2.83745	3.34725	2.23107	2.22763	1.14033	3.16179	2.20817	2.50865	-2.03388	-2.19755	-2.05206	-0.793941	-0.68176	-1.2896	-0.538453	-0.738585
	1.99778	3.11814	1.48394	3.45314	1.93828	2.34749	2.01373	2.11988	3.22268	2.21399	1.20518	2.33659	1.70929	3.91508	2.76671	4.47779	1.29268	2.10983	3.17546	3.08648	2.35197	2.33741	1.91322	1.79509	1.43248	2.20547	2.82739	1.82045	2.14176	1.85469	1.42768	2.15382	3.16326	2.08758	1.47435	2.11157	2.06542	2.22856	1.98417	2.74615	0.856976	0.445767	1.42689	-1.31871	-0.43271	-0.297744	-0.439061	-0.828964	-1.84835
	2.8296	4.67353	3.82763	2.76671	3.21076	3.41719	2.2044	2.42055	2.38268	4.56479	2.99968	3.59935	2.76944	2.44127	2.11299	3.11241	3.60764	3.0979	1.83181	3.22316	2.43536	3.28066	2.12959	1.91713	2.53953	2.84129	2.23933	3.78352	1.93986	2.78344	2.7309	4.57237	2.54644	2.19648	2.27051	3.34772	1.13915	3.04018	1.77637	3.19557	1.61674	-1.776	-1.18834	-1.60892	-2.62982	-1.59027	-0.278189	-0.558082	-0.180733
	0.833624	-0.611	-1.30666	-1.90998	-3.53411	-2.2076	-1.38814	-1.79025	-2.62262	-2.09169	-1.95778	-1.87473	-2.72484	-1.58435	-1.39869	-0.385562	-0.644011	-0.14216	-1.17461	-0.681273	-0.889271	-1.25151	-2.34226	2.95166	2.66911	1.46712	1.92599	2.35174	2.47912	4.29076	1.5862	2.91625	2.66521	3.62197	1.94829	2.48115	1.4696	3.4593	1.37868	2.01898	1.18183	-0.623116	-0.389853	-2.76548	-1.96178	-0.685629	0.454013	0.606071	0.443586
	1.6788	2.48978	2.26167	4.17004	3.06191	2.00732	1.28256	3.66181	4.05348	1.71987	1.62604	3.93806	3.84999	1.4279	2.63628	3.26609	3.56236	1.40602	2.18028	3.13842	4.07249	2.33398	4.40347	3.38774	1.69109	2.56787	4.77148	2.53793	2.24654	2.24348	4.53326	2.41411	1.82093	3.22009	2.6095	3.24739	2.47791	3.12641	2.1509	2.26622	1.06665	-2.4574	-0.132039	-1.54283	-1.25226	-0.301295	-0.148781	-0.102348	-0.237801
	2.26622	1.06665	-2.4574	-0.132039	-1.54283	-1.25226	-0.301295	-0.148781	-0.102348	-0.237801	-1.60099	-1.74247	-1.59019	-3.38733	-3.04405	-1.92654	-2.26354	-0.971564	-0.605892	-0.295936	-0.0836861	-0.35093	-0.101627	-0.0732388	-0.07868	-1.07165	-1.13517	-1.76553	-2.05361	3.08467	2.97491	1.97395	2.94792	2.31532	3.49816	2.41878	1.59638	1.89087	3.91508	2.7773	2.17572	2.47463	2.07125	3.529	2.39679	3.13073	2.46868	3.30438	3.44467
	2.78828	5.4149	2.81259	1.20211	3.61253	4.07983	2.7059	2.14011	-2.29084	-3.13041	-2.37293	-3.04997	-2.02177	-4.86985	-2.16174	-1.20194	-0.756235	-0.43817	-2.44964	-4.02448	-2.94766	-1.57445	-1.06547	-0.634494	-1.69447	-1.63659	-0.274196	-0.401914	-0.310855	-0.403339	0.492505	2.75967	2.49052	3.41266	2.97636	2.36724	2.41543	1.81297	2.97254	2.40005	2.34196	4.6133	3.78008	2.90599	1.42388	4.32435	3.64029	2.13155	2.5951
	0.558333	0.802868	0.594463	0.452564	1.81042	2.17826	1.53872	2.04478	0.812762	1.27086	0.629618	0.44523	0.985978	1.35499	3.62435	2.8326	1.03642	1.21381	2.72515	3.73438	1.96511	0.707062	2.56194	0.803489	3.67351	1.65196	0.286489	1.23039	1.01927	1.43638	0.92677	3.09686	2.03417	1.31829	0.859279	0.715905	2.66591	1.00801	1.29922	0.267877	0.234981	0.0395704	0.798575	2.15436	0.761541	0.381848	1.41221	1.53321	1.69304
	1.27086	0.629618	0.44523	0.985978	1.35499	3.62435	2.8326	1.03642	1.21381	2.72515	3.73438	1.96511	0.707062	2.56194	0.803489	3.67351	1.65196	0.286489	1.23039	1.01927	1.43638	0.92677	3.09686	2.03417	1.31829	0.859279	0.715905	2.66591	1.00801	1.29922	0.267877	0.234981	0.0395704	0.798575	2.15436	0.761541	0.381848	1.41221	1.53321	1.69304	1.70689	1.33726	1.06069	1.4268	2.12334	1.67402	3.14884	1.43303	1.31211
	2.15436	0.761541	0.381848	1.41221	1.53321	1.69304	1.70689	1.33726	1.06069	1.4268	2.12334	1.67402	3.14884	1.43303	1.31211	0.850465	1.29386	1.71783	1.5701	1.96597	-0.665001	-0.793608	-1.48036	-0.291957	-0.376557	-0.234957	-1.04122	-1.51167	-0.752567	-1.07749	-0.783116	-1.54416	1.94784	3.64955	1.53089	0.702316	1.18535	1.1572	1.66894	2.6622	1.64526	0.850411	0.878827	2.0407	0.872195	0.67117	1.31592	2.69269	2.15571
	1.31211	0.850465	1.29386	1.71783	1.5701	1.96597	-0.665001	-0.793608	-1.48036	-0.291957	-0.376557	-0.234957	-1.04122	-1.51167	-0.752567	-1.07749	-0.783116	-1.54416	1.94784	3.64955	1.53089	0.702316	1.18535	1.1572	1.66894	2.6622	1.64526	0.850411	0.878827	2.0407	0.872195	0.67117	1.31592	2.69269	2.15571	0.638748	1.10989	1.30474	1.6475	0.508795	1.45154	-1.40787	-1.02875	-0.828765	-0.447501	-0.762059	-0.735526	-2.75447	-1.32785
	1.30474	1.6475	0.508795	1.45154	-1.40787	-1.02875	-0.828765	-0.447501	-0.762059	-0.735526	-2.75447	-1.32785	-2.79432	-2.2248	-2.43792	-2.38584	-1.40196	-2.49623	-1.98884	-1.26164	-1.5676	-1.42606	-0.258662	-1.04211	-0.212874	-0.347211	-0.301469	-0.47534	-0.580652	-0.206616	-1.48125	-0.453577	-0.359614	-1.68217	-0.298711	-0.966734	1.22362	2.29408	2.53523	1.14866	1.68267	1.64504	2.61339	2.39249	1.96142	1.86374	1.45003	0.3293	2.65054
	-0.206616	-1.48125	-0.453577	-0.359614	-1.68217	-0.298711	-0.966734	1.22362	2.29408	2.53523	1.14866	1.68267	1.64504	2.61339	2.39249	1.96142	1.86374	1.45003	0.3293	2.65054	1.60488	2.25479	1.63926	1.45492	1.38433	1.85124	0.920514	2.0881	1.29054	2.02564	1.65181	1.75222	1.94612	1.00108	0.78852	3.32105	1.92232	1.30374	1.04847	1.30471	2.57976	1.35856	1.9051	0.798047	1.61768	-1.86361	-1.60317	-0.962433	-1.9173
	1.7699	1.91748	1.41625	2.23019	0.427912	1.74276	1.96687	0.624516	1.82815	-1.0908	-0.603793	-0.597295	-0.197412	-0.718823	-1.06947	-0.811332	-0.61866	-1.10139	-2.94083	-3.67093	-0.707366	-1.1423	-0.937018	-0.941499	-1.0549	-0.641123	-0.579138	-0.460232	-0.232935	-0.30752	-0.959989	-1.66884	-0.685783	-1.41971	1.96438	1.1575	1.74171	1.80014	1.16443	1.59219	1.38725	1.64235	0.775918	0.8152	0.505063	-2.06756	-2.63676	-1.08822	-1.62438
	1.46677	2.0921	1.31609	0.46209	2.1146	1.29223	1.12697	2.5972	1.16888	0.515443	0.748664	0.745257	1.04667	0.730226	0.242766	0.710308	0.78855	2.15653	2.43917	1.10437	2.63737	1.03962	1.91661	1.00826	0.600359	1.22674	2.37709	2.23061	1.04747	2.94311	2.66793	2.32809	0.746434	0.878385	1.2928	2.65072	2.3667	1.42712	1.28174	0.482134	1.28072	-1.04495	-0.500518	-2.13262	-1.48578	-1.31774	-0.453915	-1.69789	-1.43901
	0.819489	0.972475	1.02061	1.88422	0.549136	0.939885	0.496099	0.895721	1.95598	3.63943	2.17302	1.65346	1.84256	2.30353	2.70412	3.36831	1.69432	1.50742	2.01532	3.469	1.81008	1.8185	1.94777	0.76718	1.48703	1.16685	1.28237	2.11086	3.05907	1.55467	1.8859	3.9642	1.54939	1.78094	1.29266	1.90158	1.48642	1.05009	1.21065	0.450957	1.27372	-0.642678	-1.6553	-2.33512	-0.981143	-0.393525	-0.624132	-0.566512	-2.11756
	0.684597	1.75087	2.14259	2.35418	2.3472	0.987284	1.51017	1.62148	1.96044	3.73406	0.843691	-1.73308	-1.17512	-0.605456	-0.972406	-0.719308	-0.929358	-0.326767	-0.56091	-1.43102	-1.69581	-2.6722	-1.32793	2.12426	1.52678	1.58275	3.66232	2.56753	1.40647	1.73994	2.47612	1.79588	1.79259	2.50336	1.31942	1.95383	2.65027	1.31939	1.17343	2.60604	1.72604	0.473327	1.6901	2.25503	1.68639	2.38587	2.00519	2.1259	2.70454
	-0.326767	-0.56091	-1.43102	-1.69581	-2.6722	-1.32793	2.12426	1.52678	1.58275	3.66232	2.56753	1.40647	1.73994	2.47612	1.79588	1.79259	2.50336	1.31942	1.95383	2.65027	1.31939	1.17343	2.60604	1.72604	0.473327	1.6901	2.25503	1.68639	2.38587	2.00519	2.1259	2.70454	1.83212	1.47204	1.1188	1.59561	2.26717	1.58152	3.45447	2.536	0.454513	-1.01188	-1.33692	-1.14971	-0.796353	-1.9086	-0.980442	-3.18419	-3.61428
	-0.980442	-3.18419	-3.61428	-2.36117	-0.989139	-1.34715	-1.82415	-1.93049	-2.68199	-3.00182	-1.94722	-0.822273	-1.64686	-2.5018	-1.31317	-1.8336	-1.5271	-1.42586	-1.03297	-0.856735	-1.46529	-1.53207	-0.52728	-1.26527	-1.0622	-0.623885	-1.42214	-2.3344	3.2027	0.229983	1.71828	4.16222	2.5069	1.72339	1.15997	1.5022	1.89067	2.2951	2.9085	2.58089	0.852733	-0.723837	-1.39927	-1.9369	-1.99861	-1.01481	-0.424106	-0.441958	-0.825032
	2.06224	2.30797	1.18777	2.8608	1.21658	2.53152	2.81677	1.76025	3.37012	2.02561	0.282997	1.51787	2.72785	4.34736	0.500694	0.874267	2.28203	1.638	3.60565	1.16052	-0.892731	-0.810014	-0.979263	-1.4582	-1.45657	-0.20802	-0.711344	-0.745164	-1.4805	-2.18771	-0.47663	2.30432	0.878905	2.28705	4.30724	1.22223	1.45252	1.88897	0.696051	2.2707	1.70502	1.01149	2.27227	1.46388	2.33714	1.96767	2.64241	2.53013	2.16696
	1.45252	1.88897	0.696051	2.2707	1.70502	1.01149	2.27227	1.46388	2.33714	1.96767	2.64241	2.53013	2.16696	1.21866	1.88296	1.83741	3.44168	2.06961	1.83808	1.91065	1.44048	2.85928	2.53222	1.04379	1.62984	0.877347	2.06056	2.99465	1.88079	1.07771	0.77089	2.34099	2.11432	1.12213	1.20025	2.91845	2.72651	2.40357	0.591721	1.59308	1.87288	1.10485	1.48747	3.07454	0.730734	0.973297	1.8961	2.23628	2.82931
	2.53013	2.16696	1.21866	1.88296	1.83741	3.44168	2.06961	1.83808	1.91065	1.44048	2.85928	2.53222	1.04379	1.62984	0.877347	2.06056	2.99465	1.88079	1.07771	0.77089	2.34099	2.11432	1.12213	1.20025	2.91845	2.72651	2.40357	0.591721	1.59308	1.87288	1.10485	1.48747	3.07454	0.730734	0.973297	1.8961	2.23628	2.82931	2.1626	0.417981	1.68677	1.86634	2.98203	2.19227	1.78514	2.37896	1.20407	0.882396	2.17345
	-2.45263	-1.53706	-1.65748	-1.61502	-1.08511	-0.329145	-0.39465	-0.469908	-1.0741	-1.19943	-0.857597	-2.54661	3.2924	3.0459	0.675465	1.12287	3.25065	4.16896	1.82118	0.965888	2.03165	2.03106	3.42268	1.71102	1.52919	1.58359	0.966025	3.07938	2.92774	1.67451	0.802623	0.944608	1.34147	1.9015	1.32956	1.26176	1.6961	0.963202	2.22021	0.897665	0.832727	0.166106	0.652145	0.557442	1.56823	1.22464	1.05038	0.332481	3.11546
	0.352394	0.465267	1.58691	1.78875	0.684783	0.875055	0.595977	2.89813	2.45894	1.25917	0.557731	2.60357	1.54629	2.11098	1.23457	0.505442	2.84164	1.29865	1.62273	3.01362	1.4276	1.16009	2.13953	0.804749	0.927811	1.94681	1.23003	2.85752	2.59751	0.623997	1.21734	0.777607	1.61663	0.89154	2.16837	2.71448	0.5062	1.86999	3.20168	2.22475	1.43654	1.54625	0.548388	1.36452	1.36678	1.83778	0.661925	1.55039	2.05154
	1.23003	2.85752	2.59751	0.623997	1.21734	0.777607	1.61663	0.89154	2.16837	2.71448	0.5062	1.86999	3.20168	2.22475	1.43654	1.54625	0.548388	1.36452	1.36678	1.83778	0.661925	1.55039	2.05154	2.18034	3.23178	1.72031	1.34084	0.813861	1.19571	1.27502	0.697384	1.65019	1.87411	2.07136	1.26221	1.14889	0.18906	1.35843	1.62635	2.2693	1.03262	0.248949	1.15967	0.966207	1.0652	0.696483	0.508878	0.827974	1.23661
	2.16837	2.71448	0.5062	1.86999	3.20168	2.22475	1.43654	1.54625	0.548388	1.36452	1.36678	1.83778	0.661925	1.55039	2.05154	2.18034	3.23178	1.72031	1.34084	0.813861	1.19571	1.27502	0.697384	1.65019	1.87411	2.07136	1.26221	1.14889	0.18906	1.35843	1.62635	2.2693	1.03262	0.248949	1.15967	0.966207	1.0652	0.696483	0.508878	0.827974	1.23661	2.22272	2.85129	1.20938	1.2192	2.0681	1.54582	0.664859	1.13348
	1.35843	1.62635	2.2693	1.03262	0.248949	1.15967	0.966207	1.0652	0.696483	0.508878	0.827974	1.23661	2.22272	2.85129	1.20938	1.2192	2.0681	1.54582	0.664859	1.13348	2.1538	1.573	1.43712	1.22388	0.701811	1.54177	1.3717	0.934172	0.978945	1.40347	1.65704	1.10515	1.06952	2.15824	2.0256	1.94031	0.655014	0.375489	1.61471	1.83495	3.09195	1.59883	0.687916	1.6106	2.27774	0.774072	0.426959	1.26128	2.18427
	0.966207	1.0652	0.696483	0.508878	0.827974	1.23661	2.22272	2.85129	1.20938	1.2192	2.0681	1.54582	0.664859	1.13348	2.1538	1.573	1.43712	1.22388	0.701811	1.54177	1.3717	0.934172	0.978945	1.40347	1.65704	1.10515	1.06952	2.15824	2.0256	1.94031	0.655014	0.375489	1.61471	1.83495	3.09195	1.59883	0.687916	1.6106	2.27774	0.774072	0.426959	1.26128	2.18427	2.13991	0.89014	2.13697	1.07988	0.899872	2.764
	1.61471	1.83495	3.09195	1.59883	0.687916	1.6106	2.27774	0.774072	0.426959	1.26128	2.18427	2.13991	0.89014	2.13697	1.07988	0.899872	2.764	1.7796	0.500592	0.937277	0.191805	0.451928	0.7617	1.12795	0.900647	1.25355	0.621142	1.67188	1.50145	1.25165	1.22879	1.37383	1.85158	1.09711	0.513627	1.40771	1.18815	0.140865	0.921292	1.07287	0.827855	0.154483	2.39326	1.34052	0.38647	2.55581	2.29231	0.515518	1.8499
	0.89014	2.13697	1.07988	0.899872	2.764	1.7796	0.500592	0.937277	0.191805	0.451928	0.7617	1.12795	0.900647	1.25355	0.621142	1.67188	1.50145	1.25165	1.22879	1.37383	1.85158	1.09711	0.513627	1.40771	1.18815	0.140865	0.921292	1.07287	0.827855	0.154483	2.39326	1.34052	0.38647	2.55581	2.29231	0.515518	1.8499	3.40963	0.73593	1.17658	2.62924	-0.109521	-1.31279	-1.58443	-2.21585	-0.594482	-0.683708	-0.353463	-0.25415
	1.68399	2.2742	1.24714	2.09566	2.1759	1.30412	1.53189	-1.58684	-1.50895	-1.48842	-1.33088	-1.62117	-1.3887	-1.05221	-1.29945	-0.285239	-0.856319	-0.189832	-0.779242	-0.486139	-1.61265	-1.54686	-0.853049	-0.660872	-0.992169	1.04189	2.70959	2.53373	1.60681	1.28689	1.54634	2.10073	2.11939	1.67001	1.90882	2.11431	1.13404	1.49104	1.6761	2.25252	1.50057	1.73813	0.765726	1.98164	1.62436	1.89064	1.40488	0.59832	0.637811
	-1.62117	-1.3887	-1.05221	-1.29945	-0.285239	-0.856319	-0.189832	-0.779242	-0.486139	-1.61265	-1.54686	-0.853049	-0.660872	-0.992169	1.04189	2.70959	2.53373	1.60681	1.28689	1.54634	2.10073	2.11939	1.67001	1.90882	2.11431	1.13404	1.49104	1.6761	2.25252	1.50057	1.73813	0.765726	1.98164	1.62436	1.89064	1.40488	0.59832	0.637811	1.03852	1.32664	2.00638	0.241216	0.327741	3.11922	1.5849	0.938929	0.945154	0.993222	1.86303
	2.70959	2.53373	1.60681	1.28689	1.54634	2.10073	2.11939	1.67001	1.90882	2.11431	1.13404	1.49104	1.6761	2.25252	1.50057	1.73813	0.765726	1.98164	1.62436	1.89064	1.40488	0.59832	0.637811	1.03852	1.32664	2.00638	0.241216	0.327741	3.11922	1.5849	0.938929	0.945154	0.993222	1.86303	3.12743	0.487294	0.591278	1.93816	0.49222	0.361464	0.604651	0.29252	0.0890293	1.42252	1.69786	1.75791	0.231294	1.90031	-1.66394
	-3.10214	-0.699974	-1.46797	-0.675338	-2.10375	-2.7752	-2.54301	-1.19454	-1.17477	-2.84877	-2.68587	-2.22244	-1.10763	-1.29626	-1.64802	-1.91602	-1.76595	-2.40109	-0.901404	-0.815701	-1.11291	-1.21718	-1.93806	-0.507715	-1.30585	-0.124128	-0.215091	-0.660258	-1.1989	-1.74562	1.46828	1.10665	1.52571	0.757482	2.20505	4.25051	1.26734	1.47867	0.908956	2.23785	3.88845	1.61038	1.10099	1.6208	1.72163	1.39619	1.01862	2.54132	1.64053
	3.88845	1.61038	1.10099	1.6208	1.72163	1.39619	1.01862	2.54132	1.64053	2.15527	2.32811	0.52367	1.76841	1.88679	2.13076	0.867448	1.65258	0.857446	3.00164	1.89563	1.27306	1.72494	2.49611	1.52048	1.64821	3.17408	0.859786	1.36122	1.43639	1.55776	2.14796	2.51217	0.922502	1.90734	2.06653	2.11572	2.8971	1.20859	0.975886	0.86587	0.687598	3.00307	2.84192	1.33091	1.37847	1.04515	0.783535	2.22279	2.62001
	-1.17489	-2.38095	-2.44315	-2.10617	-1.21054	-1.77889	-1.18651	-1.732	-2.38961	-2.17595	-1.28604	-2.38739	-1.37759	-1.07054	-1.31689	-0.465979	-1.01498	-0.0965687	-0.210269	-0.453734	-0.893104	-1.41098	-0.957794	-1.09827	-0.281518	-0.508017	-0.283643	-0.724722	-0.395626	0.453176	0.695625	0.520095	0.988373	0.19429	0.371729	2.71399	0.86634	0.810832	1.55883	1.76062	0.362449	-1.74545	-1.2174	-0.714775	-2.06478	-2.04597	-0.936995	-0.484478	-1.45628
	-0.744422	-0.568527	-0.134141	-0.38373	-0.498819	-0.548078	-0.297141	-1.07844	-1.18379	-0.628651	-2.0102	0.771438	1.11271	1.11407	0.748502	0.299498	2.40607	1.28771	1.11846	1.33668	2.00609	1.5642	2.27366	2.20175	1.01317	1.33801	1.81966	2.38177	2.53969	1.87331	0.696564	0.378438	0.569663	1.50733	1.91973	2.2504	0.897053	0.925064	1.28094	1.45027	1.54214	-1.52449	-1.10754	-2.1174	-1.04771	-1.36412	-3.05141	-2.44773	-1.75333
	-2.32799	-2.29107	-1.934	-1.34192	-1.63541	-0.807476	-1.18762	-1.2141	-1.53262	-0.496656	-0.785286	-0.246163	-0.0543695	-0.373325	-1.23643	-0.853496	-1.55784	-1.17237	-0.679749	2.45521	1.41404	1.4518	2.3851	1.81042	0.629719	1.9157	1.18371	2.82809	2.90688	1.06772	1.09517	1.63992	1.72509	2.66677	1.7126	0.800854	1.29706	3.0542	3.15828	0.632853	0.352202	0.798825	1.00241	0.0826212	1.49679	0.57606	NaN	NaN	NaN
	4.18565	1.91391	2.41905	2.79077	2.06817	2.51853	5.20112	0.446398	2.38186	2.80928	3.53	2.17798	1.66796	1.84764	1.39603	-0.933984	-1.00529	-0.152747	-0.602436	-0.762081	-2.35844	-1.64808	-2.15906	-2.58683	-2.51698	-3.32495	-2.17245	-1.32321	-1.54685	-1.9576	-0.763093	-0.796294	-0.302005	-0.247576	-0.892503	-1.86596	-3.43252	2.30463	2.00146	1.69492	0.863764	3.32039	3.29314	3.14637	2.87453	1.47168	2.1331	3.59765	1.50261
	2.30463	2.00146	1.69492	0.863764	3.32039	3.29314	3.14637	2.87453	1.47168	2.1331	3.59765	1.50261	2.38021	3.32398	2.75832	2.08004	2.93107	4.17704	2.28366	1.3599	3.09936	4.8471	1.24685	-2.52431	-1.67555	-4.75033	-1.17817	-3.88992	-2.32662	-2.60218	-0.197544	-3.43461	1.75364	4.78767	2.83748	1.1674	3.74242	0.56114	3.16837	2.14713	0.633347	0.489938	0.976434	0.246541	0.67922	0.0213187	1.93683	1.29379	2.24486
	2.93107	4.17704	2.28366	1.3599	3.09936	4.8471	1.24685	-2.52431	-1.67555	-4.75033	-1.17817	-3.88992	-2.32662	-2.60218	-0.197544	-3.43461	1.75364	4.78767	2.83748	1.1674	3.74242	0.56114	3.16837	2.14713	0.633347	0.489938	0.976434	0.246541	0.67922	0.0213187	1.93683	1.29379	2.24486	1.92933	4.76537	2.78579	2.43381	2.13613	0.447382	1.17723	3.80391	1.04563	2.76746	1.93269	1.97557	1.24497	1.88477	2.82764	3.65787
	-0.713336	-1.83207	-3.01943	-3.16679	-4.5987	-2.89888	-1.54545	-2.91846	-2.96441	-2.62273	-0.357428	-2.38893	-0.658069	-0.715632	-3.33101	-2.55271	-1.94018	-1.16928	-2.45008	-2.58893	-1.92699	-2.1172	-0.647066	-1.41395	-3.98317	-2.12497	-0.967942	-0.497066	-2.61957	-1.45643	-0.985511	-0.664374	-1.10666	-1.18536	4.43883	2.7163	1.81969	1.90927	2.26644	2.75153	4.17046	2.76608	1.78564	2.71057	1.60083	1.80768	3.63286	2.49318	3.40194
	2.69722	1.87682	-1.89089	-2.88697	-2.72106	-1.60649	-1.44055	-3.54732	-2.33024	-3.10636	-1.84768	-2.53704	-1.62098	-2.70473	-2.00516	-0.976884	-1.60038	-2.47803	-0.327494	-0.669806	-0.37403	-1.83035	-1.66215	-1.59371	-4.34768	1.82064	1.41913	2.87494	2.85968	3.7894	3.5108	1.40036	3.65395	2.555	3.1357	2.94875	2.075	2.49524	2.15898	2.15841	1.73361	3.87043	3.85158	2.28285	2.07155	3.08603	3.76556	1.15233	3.16261
	-4.54636	-1.66501	-1.17001	-1.88882	-2.07054	-2.347	0.335701	2.38238	0.0738905	0.771896	2.77449	3.66068	1.50941	3.73085	2.05008	2.25675	1.3355	4.19344	3.40702	2.90184	3.54782	2.15297	2.79077	4.04314	3.10128	1.5842	2.28847	3.29168	3.1279	3.56495	2.2381	2.44578	1.6768	3.67152	2.59399	2.0514	3.86298	3.03726	2.42648	2.66999	2.99432	2.39886	2.75691	2.83863	2.59707	1.89479	2.92096	2.2874	3.68117
	2.85584	3.5774	1.62034	2.85267	2.90222	1.58845	4.22106	3.96681	3.37192	1.82783	2.6182	5.50024	0.579044	3.20579	2.11554	3.59807	1.9541	2.01903	1.64451	1.45713	2.50995	4.60997	1.34996	2.11418	2.89815	5.20545	2.03312	2.335	0.789097	2.27341	2.39899	1.50603	1.9392	1.41588	3.12548	4.43394	3.06621	1.39808	2.80385	3.40744	3.51088	1.49205	3.13776	2.17775	0.878901	3.08417	4.57922	1.99111	1.64049
	3.12548	4.43394	3.06621	1.39808	2.80385	3.40744	3.51088	1.49205	3.13776	2.17775	0.878901	3.08417	4.57922	1.99111	1.64049	4.09162	2.05488	2.84662	1.79595	4.47338	2.91332	1.55133	1.96779	3.49712	4.24048	1.88343	2.08433	3.67767	2.58769	1.74892	1.66495	3.41568	1.55706	2.44248	3.43215	2.6359	2.57395	1.82239	1.96097	4.26768	3.47666	2.24271	1.71544	3.50903	3.15165	1.89656	2.97285	2.27452	2.6575
	2.57395	1.82239	1.96097	4.26768	3.47666	2.24271	1.71544	3.50903	3.15165	1.89656	2.97285	2.27452	2.6575	2.94303	2.97758	2.02514	2.3645	0.805247	2.71068	1.55832	3.75369	3.27595	0.96067	1.99791	2.27637	3.44802	3.6058	0.0865677	3.22494	3.15336	5.41063	2.75601	2.41887	0.929401	3.78153	3.16239	2.06649	4.35791	2.25666	5.4823	1.85949	0.752805	4.48056	3.48901	3.44342	3.64813	1.87914	0.687377	3.50429
	1.55832	3.75369	3.27595	0.96067	1.99791	2.27637	3.44802	3.6058	0.0865677	3.22494	3.15336	5.41063	2.75601	2.41887	0.929401	3.78153	3.16239	2.06649	4.35791	2.25666	5.4823	1.85949	0.752805	4.48056	3.48901	3.44342	3.64813	1.87914	0.687377	3.50429	4.68625	1.78915	3.91401	0.766952	2.71763	2.1907	3.50278	1.03017	2.39132	3.1315	2.69765	2.61037	3.31492	2.64886	1.29843	3.62057	2.60285	3.11117	1.58875
	4.48056	3.48901	3.44342	3.64813	1.87914	0.687377	3.50429	4.68625	1.78915	3.91401	0.766952	2.71763	2.1907	3.50278	1.03017	2.39132	3.1315	2.69765	2.61037	3.31492	2.64886	1.29843	3.62057	2.60285	3.11117	1.58875	2.90942	2.47161	3.75873	2.55059	1.48445	1.70735	4.4871	4.8593	0.147931	2.02869	3.23645	2.93652	3.55772	2.03595	3.14758	-2.52598	-0.329342	-3.30756	-5.73036	-2.29393	-1.49271	-2.39207	-1.32407
	-2.47973	-2.21571	-1.34367	-1.79592	-1.94347	-1.84746	-3.21366	-2.95863	-1.27534	-1.67861	-2.16305	-2.05667	-2.07223	-0.996619	-1.32893	-1.92284	-1.31408	-0.663826	-0.884377	-0.172609	-1.0582	-0.678882	-2.37292	1.76988	4.57631	1.72827	2.85544	3.71727	1.82908	3.30591	1.62004	1.333	3.85618	3.79157	2.95316	1.99978	2.61807	1.66388	1.62313	4.10384	3.05978	2.23658	2.24667	1.56683	1.94644	4.13649	3.47953	2.32159	5.21432
	3.79157	2.95316	1.99978	2.61807	1.66388	1.62313	4.10384	3.05978	2.23658	2.24667	1.56683	1.94644	4.13649	3.47953	2.32159	5.21432	2.47582	1.72247	1.85756	4.33709	2.40858	-3.23942	-2.1478	-1.9736	-2.47624	-3.29081	-2.40346	-1.44668	-1.82906	-2.40049	2.61206	2.69067	1.3318	1.77475	4.18169	2.50433	4.26029	2.56771	1.81279	2.24069	2.04951	-1.35596	-2.41284	-2.52527	-1.3638	-3.38912	-1.3222	-2.04192	-3.21344
	2.24069	2.04951	-1.35596	-2.41284	-2.52527	-1.3638	-3.38912	-1.3222	-2.04192	-3.21344	-1.71655	-1.21806	-1.67642	-2.61801	-3.94801	-3.47625	-3.41176	-1.53993	-2.32483	-3.27469	-2.51001	-1.36601	-1.00353	-0.0683778	-2.25625	-4.30504	-0.249634	-5.73804	1.41902	1.84561	5.08948	3.4776	1.75658	1.92847	2.87798	1.59344	3.28455	2.91806	0.714676	1.44433	1.01271	2.48835	1.71758	1.66658	1.56493	3.8765	3.33265	3.25638	2.75466
	1.76387	0.439435	1.36281	3.57481	3.03308	1.41064	0.32761	3.23448	3.65949	0.928647	2.38459	1.18176	2.6701	3.5437	1.09912	3.43265	-1.51071	-0.6165	-1.39243	-0.277469	-3.79857	-2.94606	-1.6497	-3.77006	-0.726441	-1.51573	-3.39351	-2.08016	-0.768463	-1.2699	-0.742062	-0.397249	-0.757243	-0.921299	-0.661847	2.23768	1.99819	2.74695	0.751104	2.14344	1.2309	1.62786	2.80852	1.39771	3.12242	-1.70941	-2.31623	-2.95615	-1.06436
	2.86353	1.35308	1.57296	1.50201	4.28478	4.02325	2.06393	1.58581	1.56902	2.02439	2.43819	-1.22233	-0.212738	-1.85532	-3.33889	-1.92696	-1.36905	-1.62666	-1.51705	-1.05598	-0.927216	-0.781458	-0.075758	-0.701218	-0.383702	-0.535762	-1.18262	-0.894748	3.71554	2.3745	0.97063	1.54254	3.67315	2.56321	3.27799	4.10703	2.73243	2.95077	2.99777	2.56868	2.777	1.49961	2.15004	0.999426	3.16378	2.24496	0.513236	0.156314	2.00337
	2.54067	2.77713	4.58075	1.45791	2.1622	4.31251	2.12855	2.5391	0.22387	0.580653	0.723201	-0.88714	-1.6728	-2.28232	-1.13104	-0.214658	-1.92225	-1.71595	-4.72811	-3.17527	-3.06594	-1.06981	-2.02277	-2.6752	-2.8533	-0.609131	-0.854014	-0.435825	-0.192238	-1.57606	-2.42876	-4.54818	5.24113	2.49063	4.97946	3.4127	3.18595	2.56896	2.7901	1.84956	4.78102	2.74387	2.4686	3.4615	2.53106	3.72015	1.93412	4.36115	1.18393
	-1.69175	-0.612286	-0.843789	-0.135513	-0.471442	-1.23839	-2.61469	-1.49241	-2.50309	-3.56527	3.57572	1.86919	1.74263	4.07588	1.12914	1.74399	2.27657	3.93673	3.44724	2.37649	3.21777	4.35063	2.4739	4.31173	2.69827	3.07178	4.18859	3.09939	2.12452	-3.49899	-3.18302	-1.50416	-3.53272	-1.91654	-0.553604	-1.24317	-1.63847	4.31983	1.54399	4.48289	2.51181	3.30303	2.76752	2.42298	4.35105	3.25214	3.89133	2.80817	2.29672
	2.48564	3.99516	3.0528	3.17598	4.58449	2.95666	2.05028	2.23071	3.25393	2.99305	3.5229	2.15455	2.03277	4.69567	3.29994	1.90885	4.66226	3.79807	2.63367	1.564	3.75836	3.02245	2.19203	2.18005	3.22589	3.80161	1.25953	1.25867	2.5789	2.62275	2.08893	4.82402	3.04832	2.04284	1.79423	4.61931	3.8756	2.23248	2.41934	4.09982	2.48741	2.34126	4.3487	3.04916	2.01711	-3.15402	-4.30322	-1.67219	-1.45041
	4.3487	3.04916	2.01711	-3.15402	-4.30322	-1.67219	-1.45041	-0.94742	-0.666042	-2.65415	-2.25103	-5.44935	-2.63022	-2.93192	-2.14049	-3.88048	-2.60805	-0.254126	-0.730646	-0.614201	-0.737865	-0.808503	-1.50914	-1.31888	-1.28411	-2.41019	-2.73034	-1.64737	3.09178	3.48145	1.7749	2.02223	3.6567	4.1678	2.10173	1.71926	2.36763	4.6209	3.32722	2.07874	2.45041	2.95646	3.76695	3.34531	2.69139	2.75206	2.63593	2.9603	3.59393
	2.40452	1.36391	3.51981	3.7702	2.72256	2.16496	2.15123	2.96913	2.15839	5.85642	2.42883	1.92552	3.33251	3.82047	3.56847	2.02047	4.40965	3.76302	1.90035	4.69212	4.3261	1.52278	3.50406	5.63808	1.52397	4.22385	4.76931	3.88107	0.0860177	2.75152	5.02475	4.51948	2.77707	2.0361	3.37682	4.76891	1.83773	1.29898	2.3733	3.5767	3.13042	1.73204	3.33367	4.05491	1.89339	2.71486	6.03425	2.01455	2.42904
	4.69212	4.3261	1.52278	3.50406	5.63808	1.52397	4.22385	4.76931	3.88107	0.0860177	2.75152	5.02475	4.51948	2.77707	2.0361	3.37682	4.76891	1.83773	1.29898	2.3733	3.5767	3.13042	1.73204	3.33367	4.05491	1.89339	2.71486	6.03425	2.01455	2.42904	2.29827	5.02484	3.02122	2.36385	1.91361	3.85069	4.33823	2.35622	2.19923	3.71864	2.58129	-2.65007	-2.49192	-2.3565	-1.44585	-0.92977	-0.941675	-2.49901	-2.55126
	1.55252	3.19801	1.90264	2.79588	3.09393	5.36465	2.2543	0.285977	-1.94555	-1.90576	-5.46533	-3.15147	-1.59506	-0.495595	-0.60632	-1.03857	-0.829502	-4.07761	-1.94019	-0.628627	-1.22685	3.62963	1.72757	0.675303	0.525382	1.33309	1.45143	1.36459	1.56625	2.10889	1.55085	3.40453	2.25928	2.41532	2.51594	2.28616	3.52811	2.85192	1.67445	3.13771	1.29956	2.79814	3.69545	1.20027	4.7844	1.15412	2.6281	1.41732	3.6357
	3.6357	3.34703	3.70165	0.837829	2.14572	2.4854	6.97306	1.81775	0.128591	4.32978	4.47044	2.16881	2.54044	2.00564	2.55599	2.11039	0.0821263	2.30297	3.22218	0.471289	2.66819	2.3063	1.90347	1.62532	2.08821	2.05922	2.34315	1.92531	1.57347	1.0407	0.951903	2.18782	2.80672	1.35854	1.92049	4.74416	3.19232	0.794479	0.239815	1.72494	2.48759	-0.329017	-0.480288	-1.36017	-0.872391	-1.39836	-2.05208	-0.825283	1.40344
	3.977	3.60415	3.49293	2.72543	1.91912	6.07799	0.763497	3.48246	4.62754	3.64429	1.54125	2.97187	3.28189	2.81017	3.07057	1.45429	3.33805	2.66964	3.3246	1.79596	1.85238	4.07997	2.49987	3.06161	2.85273	2.75388	3.88219	2.0659	1.37873	2.6717	2.84002	3.45413	1.47288	3.63042	4.75627	2.13096	2.80261	4.10189	2.89551	3.34832	2.31824	1.47581	3.5977	4.73706	4.15281	2.13957	1.69613	6.63561	2.69232
	4.07997	2.49987	3.06161	2.85273	2.75388	3.88219	2.0659	1.37873	2.6717	2.84002	3.45413	1.47288	3.63042	4.75627	2.13096	2.80261	4.10189	2.89551	3.34832	2.31824	1.47581	3.5977	4.73706	4.15281	2.13957	1.69613	6.63561	2.69232	2.31291	3.09902	3.47837	2.11853	3.21167	3.06944	3.3855	2.99444	2.09178	2.66213	3.3688	3.71981	2.88883	3.76714	2.91457	3.05049	2.9847	4.07369	2.40562	2.85287	4.69336
	1.69613	6.63561	2.69232	2.31291	3.09902	3.47837	2.11853	3.21167	3.06944	3.3855	2.99444	2.09178	2.66213	3.3688	3.71981	2.88883	3.76714	2.91457	3.05049	2.9847	4.07369	2.40562	2.85287	4.69336	2.71949	1.83357	4.13552	4.09421	2.05148	2.57227	3.06066	2.06865	3.30529	3.48663	4.417	2.92583	2.1613	1.90637	3.97575	3.41331	3.58731	2.4232	2.73406	2.41835	6.6662	3.31781	2.60121	1.87277	3.80948
	2.09178	2.66213	3.3688	3.71981	2.88883	3.76714	2.91457	3.05049	2.9847	4.07369	2.40562	2.85287	4.69336	2.71949	1.83357	4.13552	4.09421	2.05148	2.57227	3.06066	2.06865	3.30529	3.48663	4.417	2.92583	2.1613	1.90637	3.97575	3.41331	3.58731	2.4232	2.73406	2.41835	6.6662	3.31781	2.60121	1.87277	3.80948	3.31612	3.54416	2.0298	1.68701	1.93782	1.76846	1.36194	3.60562	4.1506	5.0169	2.40789
	2.34935	2.81796	1.77972	2.0787	0.723155	2.83811	2.69912	2.05733	2.06183	1.45719	4.89378	2.10409	1.29479	-1.78486	-1.0574	-1.74674	-2.32081	-1.82758	-0.50454	-0.226169	-0.549676	-2.02352	-2.8597	-1.90954	-1.72022	-0.551161	-1.59058	-1.97801	1.37011	1.26602	0.379918	0.315953	2.1326	1.55335	2.14376	2.12077	0.395876	0.7829	0.90682	0.261596	0.141629	0.109947	0.238545	0.25597	1.08063	0.749515	1.70392	0.689251	1.41009
	-4.15039	-2.97385	-2.08935	-1.18248	-1.68712	-3.30748	-2.69631	-1.41593	-0.156082	-1.27224	-0.979789	-0.302417	-0.281901	-0.312422	-2.0731	2.6359	2.14325	1.65838	1.80806	2.8889	4.17335	2.42051	2.05537	2.023	1.68916	4.44846	1.78208	2.88144	2.17629	2.76254	2.17305	3.4032	1.71556	1.02336	2.8562	3.69344	1.4848	1.74368	1.08204	2.46982	2.35504	3.26533	2.90149	3.59288	4.04246	1.45754	2.19912	1.55902	1.60907
	-0.45759	-0.616073	-0.353011	-1.13013	-1.39061	-3.54506	-1.25211	-0.197814	2.0341	2.88191	2.32336	1.10875	1.20775	3.21762	0.923602	3.01877	5.40234	3.99068	2.00862	1.64644	2.77337	2.86324	3.14698	1.6328	1.89053	0.611468	0.888037	1.47883	2.95725	3.43052	2.35347	2.3182	4.38536	2.00706	3.36161	1.25704	0.728016	1.54904	2.26416	0.608269	2.26047	1.66418	-1.87113	-2.38608	-2.22854	-2.51791	-3.80957	-3.24243	-1.6472
	2.3182	4.38536	2.00706	3.36161	1.25704	0.728016	1.54904	2.26416	0.608269	2.26047	1.66418	-1.87113	-2.38608	-2.22854	-2.51791	-3.80957	-3.24243	-1.6472	-1.48407	-1.75775	-1.54873	-0.705047	-1.08873	-1.73406	-1.65739	-0.238938	-0.902473	-0.217608	-0.624403	-1.13695	-2.13341	4.33899	3.11824	2.38719	2.10705	2.96217	3.31681	0.947986	2.43258	2.2755	1.21454	1.1506	0.850194	2.93157	4.36617	2.36874	0.996108	1.50302	1.52497
	2.63844	1.97503	3.21738	5.92511	3.17318	1.25651	4.18446	4.99025	1.37731	3.96697	2.90089	4.11483	2.33556	4.89615	3.35382	3.19712	2.35516	2.52034	-2.98076	-2.32813	-4.84057	-2.39611	-1.42246	-1.87256	-1.79544	-1.61107	-0.620764	-0.197126	-0.552716	-0.389624	-1.45396	-2.5465	-2.66447	6.02936	4.52093	2.68451	2.32698	3.36178	3.16201	2.54336	2.41535	1.29522	2.86814	2.92989	1.53019	3.0289	2.96662	3.82713	3.90014
	4.12971	2.60778	1.5706	3.11951	2.59124	0.591591	2.55289	0.691199	2.58388	0.671061	1.72913	1.67919	0.342972	1.64416	-0.59978	-2.43408	-3.94034	-2.84409	-1.46112	-0.19402	-0.246807	-0.797583	-0.589943	-1.97446	-2.40882	3.32666	3.08431	2.96326	2.31006	3.6752	2.82397	4.55354	2.69317	5.3365	2.42454	2.3362	3.50548	3.46144	4.49903	2.30193	2.62635	1.66203	-2.75927	-2.41888	-3.10804	-0.729893	-0.749774	-2.28961	-3.89879
	-1.97446	-2.40882	3.32666	3.08431	2.96326	2.31006	3.6752	2.82397	4.55354	2.69317	5.3365	2.42454	2.3362	3.50548	3.46144	4.49903	2.30193	2.62635	1.66203	-2.75927	-2.41888	-3.10804	-0.729893	-0.749774	-2.28961	-3.89879	-3.25405	-0.478021	-3.8776	-2.247	-4.33816	-5.78977	-2.83793	-1.21813	-0.274308	-2.44341	3.73101	4.54183	2.2306	2.92351	3.17567	3.28204	2.19494	3.29405	2.24842	1.90878	1.93176	0.136625	1.05081
	4.55354	2.69317	5.3365	2.42454	2.3362	3.50548	3.46144	4.49903	2.30193	2.62635	1.66203	-2.75927	-2.41888	-3.10804	-0.729893	-0.749774	-2.28961	-3.89879	-3.25405	-0.478021	-3.8776	-2.247	-4.33816	-5.78977	-2.83793	-1.21813	-0.274308	-2.44341	3.73101	4.54183	2.2306	2.92351	3.17567	3.28204	2.19494	3.29405	2.24842	1.90878	1.93176	0.136625	1.05081	0.0395063	0.39187	1.43275	3.5153	2.83438	1.92683	5.62483	2.41902
	-3.10804	-0.729893	-0.749774	-2.28961	-3.89879	-3.25405	-0.478021	-3.8776	-2.247	-4.33816	-5.78977	-2.83793	-1.21813	-0.274308	-2.44341	3.73101	4.54183	2.2306	2.92351	3.17567	3.28204	2.19494	3.29405	2.24842	1.90878	1.93176	0.136625	1.05081	0.0395063	0.39187	1.43275	3.5153	2.83438	1.92683	5.62483	2.41902	2.64959	1.71734	1.33139	3.56381	3.94311	2.70096	3.70143	1.95937	3.03054	3.98498	1.25322	0.270522	1.84156
	-1.57098	-1.44131	-0.48084	-0.881061	-0.915474	2.76692	2.13109	1.73597	2.2908	3.09533	1.43721	2.92202	3.29894	4.06895	1.68615	2.63225	3.58637	2.34852	2.65106	0.903148	1.36146	2.13595	2.06341	1.72973	1.39086	1.11054	0.170357	0.545691	0.845443	1.9852	0.803151	0.469497	0.737306	1.2668	3.411	2.04073	0.953038	1.04537	1.7837	3.13875	2.30477	0.230157	2.29973	3.64782	1.20185	1.40853	2.55479	3.03549	2.94931
	1.68615	2.63225	3.58637	2.34852	2.65106	0.903148	1.36146	2.13595	2.06341	1.72973	1.39086	1.11054	0.170357	0.545691	0.845443	1.9852	0.803151	0.469497	0.737306	1.2668	3.411	2.04073	0.953038	1.04537	1.7837	3.13875	2.30477	0.230157	2.29973	3.64782	1.20185	1.40853	2.55479	3.03549	2.94931	1.55936	1.99145	3.28308	2.00478	1.61538	1.64123	1.24424	1.61465	2.49775	3.44524	2.256	2.63033	4.37861	2.0351
	4.37861	2.0351	1.41605	2.21384	3.91481	3.24506	2.56265	1.54126	3.56932	3.54057	2.13875	2.13226	3.50569	3.88953	1.59659	2.1232	4.02177	1.44443	4.3341	2.50371	4.55072	2.82871	2.72099	1.70786	2.73624	1.95339	5.21294	2.94193	3.37372	2.53573	3.29552	4.03957	3.48867	2.61826	2.16485	5.53172	3.50198	2.97912	3.10017	3.4891	3.79454	2.54764	2.0293	4.35539	4.58231	2.18747	2.95521	3.34011	2.64222
	1.94956	3.49946	4.39009	2.63462	2.74466	5.59614	2.93674	2.1437	2.80737	6.12541	1.35202	3.02632	3.60996	3.28381	2.12849	4.51768	2.94025	1.49718	2.16544	4.57153	3.7142	1.88455	2.22544	5.79972	3.06965	2.54941	3.62214	4.61176	2.03904	3.08271	5.90447	2.73022	1.25	4.53767	4.57529	2.73354	2.45506	4.48519	2.75515	2.64394	2.92269	4.02228	1.54104	1.5523	1.26401	3.92696	4.01768	1.81126	2.43311
	3.08271	5.90447	2.73022	1.25	4.53767	4.57529	2.73354	2.45506	4.48519	2.75515	2.64394	2.92269	4.02228	1.54104	1.5523	1.26401	3.92696	4.01768	1.81126	2.43311	2.22308	4.52319	3.05611	2.65378	4.92183	2.76366	2.47815	3.00929	4.66882	3.1778	2.06623	3.4177	3.82303	2.54031	3.93094	3.21493	3.44199	2.65962	3.94903	2.2219	3.71872	2.52059	3.25603	2.15644	4.66563	3.88329	1.37585	1.88568	4.55122
	2.64394	2.92269	4.02228	1.54104	1.5523	1.26401	3.92696	4.01768	1.81126	2.43311	2.22308	4.52319	3.05611	2.65378	4.92183	2.76366	2.47815	3.00929	4.66882	3.1778	2.06623	3.4177	3.82303	2.54031	3.93094	3.21493	3.44199	2.65962	3.94903	2.2219	3.71872	2.52059	3.25603	2.15644	4.66563	3.88329	1.37585	1.88568	4.55122	3.907	2.09895	4.00712	2.46064	3.42972	1.54659	3.66794	4.90242	2.03464	3.68346
	3.66794	4.90242	2.03464	3.68346	3.56315	2.73466	2.85632	4.06381	2.6634	2.72169	1.93818	5.61977	3.39365	2.89034	3.64474	4.45504	2.08328	2.9896	4.82306	2.74376	2.50564	3.24513	3.16066	3.53992	4.58263	4.34301	1.6053	2.14498	2.64759	4.37127	3.74198	2.00891	2.19337	5.15775	4.27581	2.27677	3.34449	2.00343	3.62037	3.97501	4.58019	1.74234	3.00501	3.47638	4.08301	1.55321	3.28342	3.39229	3.39454
	3.24513	3.16066	3.53992	4.58263	4.34301	1.6053	2.14498	2.64759	4.37127	3.74198	2.00891	2.19337	5.15775	4.27581	2.27677	3.34449	2.00343	3.62037	3.97501	4.58019	1.74234	3.00501	3.47638	4.08301	1.55321	3.28342	3.39229	3.39454	1.65093	1.76034	4.58337	3.77331	2.63619	2.8616	4.81304	2.30203	3.028	3.63829	1.75243	1.9653	2.67651	1.46016	2.24877	3.13711	1.83827	-2.34086	-1.60686	-2.36983	-3.75835
	-2.34086	-1.60686	-2.36983	-3.75835	-1.15356	-2.46452	-1.4815	-1.22998	-0.756541	-0.318743	-0.693056	-2.28178	-1.39461	-1.01261	-3.95364	-3.71549	-2.40717	-2.04947	-1.9765	-1.96304	-2.75717	-2.38133	-0.685474	-0.32986	-0.160115	-0.559126	-0.47528	-0.910246	-1.22589	-1.66171	-2.0738	-1.81547	-1.87919	2.57671	2.95876	1.5143	1.35122	2.23461	4.01151	3.31799	3.06455	2.33301	3.80089	2.30714	2.3583	2.94195	2.91091	3.39552	0.664407
	-1.81375	-0.311462	-2.4558	-3.11114	-1.63003	-3.46605	-2.48044	-4.27588	-2.08413	-1.72986	-2.25644	-1.69052	-0.691212	-1.94485	-1.74932	-0.211277	-0.850536	-0.48337	-0.303771	1.22857	5.13069	3.26217	1.66933	2.65184	4.40892	3.65812	1.97996	2.94189	3.13793	4.37841	5.21498	0.264464	5.21482	4.62211	1.81921	2.53913	3.14917	1.432	3.78114	2.72234	3.07408	3.65337	2.98196	2.89954	3.97921	3.7061	3.31186	2.51582	4.62617
	3.26217	1.66933	2.65184	4.40892	3.65812	1.97996	2.94189	3.13793	4.37841	5.21498	0.264464	5.21482	4.62211	1.81921	2.53913	3.14917	1.432	3.78114	2.72234	3.07408	3.65337	2.98196	2.89954	3.97921	3.7061	3.31186	2.51582	4.62617	3.19158	3.20074	2.04317	3.13114	2.80729	2.03362	3.65361	4.22872	1.41769	1.70594	3.23128	0.295358	4.06967	2.29969	2.51123	2.71417	2.53146	2.13871	4.34534	4.20676	2.63995
	1.57246	1.97583	2.1885	1.64114	3.01	3.10966	2.38722	1.67809	2.26136	1.26442	3.19021	2.04636	1.94452	-1.54006	-2.45974	-3.09455	-2.70771	-2.38625	-1.81434	0.964867	1.30902	1.04653	2.24995	1.68889	1.29711	0.349937	0.663669	3.64366	3.74346	2.26461	0.675252	1.08611	4.04774	3.70189	2.86487	0.368662	2.62682	0.575824	1.01134	2.53647	2.10436	1.47974	1.73304	1.83753	0.847929	1.97201	1.19551	2.5306	-0.740776
	1.91065	2.90401	2.60753	2.87013	-1.13939	-2.65487	-2.06364	-0.670602	-1.14041	-2.45201	-0.57989	-0.530537	-1.43394	-4.35692	-2.2653	-2.93979	-2.27481	-3.69402	-4.12134	-3.44184	-1.77527	-1.94722	-1.08854	-3.36376	-1.77903	-0.783949	-0.341377	-0.544266	-1.16644	-0.591844	-1.80692	4.21973	2.66298	4.15838	1.64614	1.78069	2.5831	2.93289	4.41618	3.86757	2.05013	2.96239	3.5595	5.38717	3.068	2.80893	2.57057	3.08257	2.96396
	-3.44184	-1.77527	-1.94722	-1.08854	-3.36376	-1.77903	-0.783949	-0.341377	-0.544266	-1.16644	-0.591844	-1.80692	4.21973	2.66298	4.15838	1.64614	1.78069	2.5831	2.93289	4.41618	3.86757	2.05013	2.96239	3.5595	5.38717	3.068	2.80893	2.57057	3.08257	2.96396	3.06764	2.84315	3.70579	2.50186	2.52017	1.2468	3.47453	3.05645	1.52115	2.9839	2.5497	1.88631	1.9284	2.39771	2.69863	1.81187	3.19893	4.14665	3.48532
	3.47453	3.05645	1.52115	2.9839	2.5497	1.88631	1.9284	2.39771	2.69863	1.81187	3.19893	4.14665	3.48532	1.73116	1.19197	1.45851	-1.46489	-3.49942	-2.88452	-0.325418	-3.01156	-0.44361	-1.14347	-1.35263	-0.639638	-2.05134	-2.24844	-2.77662	3.01937	1.70282	1.60929	2.65761	4.12205	2.18318	3.42961	1.6878	2.68126	1.90609	3.50106	1.58488	2.78455	1.36192	1.87534	2.14637	1.4421	3.28262	3.19243	1.84226	2.99275
	0.160065	1.55299	2.11732	2.75325	0.966524	2.60852	3.96771	2.97204	2.39418	2.69217	2.89425	2.85244	4.28936	2.73804	0.263536	3.67645	5.41223	3.88983	0.438991	2.6451	3.74303	1.46891	4.02057	4.55933	2.86621	2.64272	2.48022	2.295	3.81408	2.02989	1.2953	4.23126	3.48305	2.45358	1.89404	1.9175	3.38076	3.59015	3.41919	2.18642	2.27156	2.09221	1.82351	2.78185	1.47233	2.69195	0.513571	0.376507	0.751824
	1.89404	1.9175	3.38076	3.59015	3.41919	2.18642	2.27156	2.09221	1.82351	2.78185	1.47233	2.69195	0.513571	0.376507	0.751824	0.956603	0.841798	1.11691	1.33901	1.22643	0.781407	1.58465	1.57388	4.95012	2.05681	2.10534	1.48089	2.85952	1.96366	2.3763	2.57208	2.65476	1.78515	3.49434	2.98688	2.61087	2.6337	3.06604	3.06677	2.123	3.11009	3.43824	3.25272	2.03942	2.97999	1.66752	4.9458	3.88904	3.12073
	2.6337	3.06604	3.06677	2.123	3.11009	3.43824	3.25272	2.03942	2.97999	1.66752	4.9458	3.88904	3.12073	2.61643	1.52518	2.86778	3.81972	1.16171	2.90758	2.07017	2.18127	1.08119	3.3365	4.37196	3.32148	2.41031	2.10722	4.23984	3.09247	2.69173	3.36821	4.26514	2.2392	2.84454	2.91587	2.69653	2.61048	2.98413	3.7758	2.28186	3.06901	3.1352	3.34813	1.30737	1.24632	1.7877	4.73087	1.59844	1.34737
	-1.0485	-0.733749	-0.385225	-1.42009	-1.77993	1.56879	1.2166	2.31502	2.23829	1.28459	0.668871	3.24718	4.71925	1.67518	1.6021	1.08173	0.702674	1.60479	2.21682	2.26789	2.08364	1.35055	0.671974	2.31725	2.85539	2.94145	1.20095	1.97462	2.42958	3.15062	1.23177	0.99645	1.98154	3.04839	2.56944	0.851814	0.795167	2.08704	3.14886	2.11242	1.06234	1.10644	-0.602163	-2.52791	-2.24876	-1.42745	-2.41158	-0.360234	-0.654746
	-1.30209	-0.279994	-1.1501	-2.06984	-1.58526	-1.97919	-4.29417	-1.58262	-2.74548	-1.18985	-1.78931	-1.62826	-0.622277	-0.0670862	-0.0997553	-0.561081	-0.313542	-1.14593	-0.651431	-0.671891	-0.359276	-0.0643221	-1.87633	-1.34759	1.484	1.61932	1.72595	2.14593	1.8985	1.83951	1.4536	0.737171	2.29892	2.74643	1.83047	1.90991	0.561965	1.03579	1.48749	2.1876	2.41586	-0.915124	-0.231497	-0.682894	-0.581427	-1.74545	-1.83649	-3.09844	-1.65138
	-1.84562	-2.23152	-2.13309	-1.47991	-1.39998	-2.24525	-0.521521	-1.56139	-1.22127	-0.783952	-1.49241	-0.925006	-0.518945	-0.191864	-0.0821173	-0.326673	-0.863604	-0.344966	-0.147601	-0.799194	-0.15641	-0.944565	-0.210223	3.34021	0.411375	1.8209	1.47293	1.74141	1.30256	1.93197	1.44872	0.732666	2.62781	3.40265	2.15308	1.98048	1.08968	2.95011	1.10435	2.18194	0.448597	-1.9479	-0.978907	-0.958733	-0.230046	-0.647882	-0.247422	-0.298193	-1.07094
	1.56537	0.882381	2.02309	3.38396	2.43067	0.577779	0.269052	0.847599	3.02604	2.57971	3.05225	2.63432	1.90349	1.27029	3.81256	2.75013	2.32023	0.395921	0.218072	0.142852	-0.0833183	-0.290072	-1.03925	-0.312599	-1.12111	-1.78021	-0.187053	-0.29509	-0.29971	-0.877838	-0.91293	0.937	1.67736	1.84451	1.4224	1.40539	1.01668	2.09103	3.53045	2.41578	2.20337	1.83575	2.42509	3.65919	2.24299	1.48686	0.986474	1.76791	4.41233
	1.39869	1.59613	2.95281	3.27049	1.41327	1.94445	0.987577	2.26369	3.32695	0.808857	4.1138	1.29833	2.83204	1.53982	4.58785	1.55231	2.45431	-2.22492	-2.68146	-0.640306	-0.239167	-0.102838	-0.441763	-0.182731	1.78707	2.92609	2.1659	4.25673	3.51994	2.12265	1.28827	1.62088	2.73911	1.12972	2.84836	0.781987	1.32826	1.48676	2.01817	2.7101	0.570019	1.28473	2.32868	0.593781	0.113194	0.313744	0.364052	0.798808	0.359054
	-2.06145	-2.03293	-1.44992	-1.78404	2.99209	3.81379	0.644746	1.47276	1.49347	4.07271	2.14201	0.477735	2.38023	1.8099	2.43527	3.10001	2.67155	1.16121	1.7216	2.66756	3.39697	2.28093	1.60589	2.15107	2.14777	3.44116	0.673301	1.79655	2.0785	1.29887	2.68826	1.54277	1.3772	1.86045	0.660663	3.14431	2.50268	1.53149	2.58837	3.38902	1.993	-1.95417	-2.29103	-2.07645	-1.08371	-0.748591	-0.946	-0.131138	-1.12646
	2.64871	3.37999	1.98367	1.70792	2.02225	2.21475	4.51172	2.72834	1.80666	3.31451	3.53858	1.57834	-4.05138	-1.97423	-0.151997	-3.61607	-1.72501	-1.70529	-0.694732	-0.188311	-0.05292	-0.436942	-2.50625	-1.02716	-2.07497	-1.9083	-3.54637	4.18961	3.69726	0.962044	3.74744	1.12654	2.851	2.36573	1.03446	3.14826	2.228	2.03592	1.01034	0.314322	1.10499	0.0508473	2.46698	2.61361	1.8301	2.68655	5.88028	0.135516	3.32343
	1.97635	1.87552	4.17687	2.73282	0.807133	3.05625	4.50458	2.15078	1.87189	1.60622	1.54674	2.13849	2.31632	2.32571	1.26383	2.62528	1.64345	4.90519	1.32958	1.424	1.11134	2.5687	4.56767	2.66848	2.29202	1.81232	2.58034	2.96282	1.96552	2.84921	2.29706	1.57419	2.04625	1.93443	1.97749	2.00106	2.80964	3.17481	1.40594	2.22065	4.75601	1.64587	2.96606	3.87409	2.8926	2.93887	-1.24021	-2.07468	-0.983436
	1.82958	3.49359	2.73065	1.12913	2.02307	4.87587	2.43599	0.593161	-2.6694	-4.26134	-3.17223	-0.38694	-2.9549	-2.37848	-2.34444	-0.80082	-2.23976	-5.91147	-1.81495	-2.8022	-2.38114	-1.26353	-2.3684	-2.14081	-2.8299	-2.32955	-2.29832	-2.38054	-0.29683	-0.182816	-0.435061	-0.272338	-0.474224	-0.797305	-1.29053	-4.9643	1.48519	0.62522	2.59453	2.7996	2.20231	3.10404	2.68335	2.13492	3.6104	3.21437	2.82248	2.34549	3.71716
	2.7996	2.20231	3.10404	2.68335	2.13492	3.6104	3.21437	2.82248	2.34549	3.71716	1.36034	1.76883	2.84292	4.20754	1.0876	2.96717	1.92201	2.62212	2.80118	2.4304	2.6527	1.62445	4.87449	-3.00268	-1.44613	-3.1337	-3.57172	-2.45191	-1.05791	-0.718482	-0.773522	-1.47586	-0.612501	-1.20006	-1.58413	-2.27665	1.39915	2.73725	4.6121	2.81948	2.86505	2.91072	2.48373	4.03734	2.9011	1.99782	3.43846	2.47973	1.89083
	-1.58413	-2.27665	1.39915	2.73725	4.6121	2.81948	2.86505	2.91072	2.48373	4.03734	2.9011	1.99782	3.43846	2.47973	1.89083	4.427	1.91831	3.95898	2.2855	1.79296	2.67899	4.58959	0.90298	2.12638	1.99215	2.35144	2.24269	5.05158	2.91184	2.87474	2.30398	2.59427	4.89109	2.41254	1.21731	1.90558	3.85053	2.02769	1.73808	0.848748	1.31803	-0.955932	-0.519425	-1.42973	-1.99596	-0.750417	-0.704298	-2.11404	-2.97058
	2.06168	2.50966	2.40676	4.0178	2.44807	1.61054	2.62261	1.64939	0.986214	1.24327	1.12742	1.72854	7.37394	1.58558	-1.26432	-0.220258	-0.356445	-1.74189	-2.21209	-1.08169	-1.13273	-1.8089	-2.0826	-2.54111	-3.98672	-2.50611	-2.44203	-3.59694	3.81076	1.46481	1.86632	2.84269	3.59355	2.92579	2.54647	1.4037	3.38648	2.07949	2.41743	2.27121	2.6314	2.4501	3.80575	1.65732	2.06595	2.31239	1.08054	4.03055	2.71118
	3.24368	3.75857	0.887195	2.28426	4.65858	3.14148	1.36196	1.93105	3.0513	2.62708	3.66019	2.61822	3.24387	1.59488	0.745411	2.35711	2.8907	3.87232	2.28707	0.761919	2.07349	4.37872	2.55028	3.03415	3.0467	1.89872	0.986169	0.876163	6.36668	3.39771	1.42375	1.60301	3.31847	3.90308	2.09762	2.71708	3.74002	2.90745	2.46	3.34424	2.86707	2.2933	2.54552	3.63653	2.75235	2.33803	2.2018	2.44432	2.41209
	1.36196	1.93105	3.0513	2.62708	3.66019	2.61822	3.24387	1.59488	0.745411	2.35711	2.8907	3.87232	2.28707	0.761919	2.07349	4.37872	2.55028	3.03415	3.0467	1.89872	0.986169	0.876163	6.36668	3.39771	1.42375	1.60301	3.31847	3.90308	2.09762	2.71708	3.74002	2.90745	2.46	3.34424	2.86707	2.2933	2.54552	3.63653	2.75235	2.33803	2.2018	2.44432	2.41209	3.40837	2.54486	2.44345	3.40692	2.93253	2.91809
	NaN	NaN	NaN	NaN	NaN	1.42831	2.92115	3.01375	0.93729	1.35785	3.5991	2.09197	1.41245	2.37969	2.96368	3.87939	1.65815	1.89725	3.07562	1.47162	2.2563	1.79634	2.12636	2.19622	1.55091	2.77462	2.52617	1.61845	1.6456	1.26144	2.9631	1.88842	2.32399	1.74433	2.35896	2.26096	3.1457	1.28178	0.979174	1.46893	1.4577	1.07318	1.7916	1.3672	1.44555	0.980819	1.02327	1.0891	1.96873
	-0.542993	-1.08994	-3.44305	0.852318	1.97509	1.23878	1.00896	1.35827	1.66878	2.00183	1.90061	2.70063	1.31902	2.4735	1.49941	2.06177	1.40075	3.59622	4.35105	1.02185	1.18599	2.14896	2.50984	2.32622	1.23101	1.19642	0.878679	1.51505	2.10323	2.16697	0.899019	0.931142	1.57384	1.84788	3.54458	1.59756	2.29569	2.18693	1.65968	0.683567	0.235252	0.169467	0.270767	1.00205	-1.47745	-0.77957	-0.748579	-0.586605	-1.16764
	-0.829461	-1.05161	-0.42325	-1.29699	-1.66309	-0.782542	-1.3706	-0.295492	-0.310513	-0.382217	-0.490984	-0.212955	-0.629456	-1.43947	-1.51309	-0.965103	-2.06759	-0.673133	-0.374909	-1.26254	-3.05154	3.46688	1.85816	0.930252	1.5306	3.26774	1.52818	1.51313	1.08999	1.98653	2.22854	1.64096	1.0601	0.46937	1.28357	0.794508	1.06944	1.38507	1.19389	1.49947	0.633101	-1.59795	-0.763331	-1.45286	-0.407969	-0.61364	-0.165662	-0.5098	-0.280587
	1.83611	3.26592	2.2518	1.65608	2.50224	2.15706	2.43795	1.34527	0.716649	2.26909	4.44579	1.43132	1.2643	1.38184	3.52039	2.34501	0.995501	1.34446	1.59485	1.09483	1.97301	1.05923	0.570569	0.634887	1.99051	0.704171	1.50422	2.70239	2.6799	2.05475	2.59531	0.58289	1.53972	2.18466	1.65901	1.76727	1.76267	1.1532	1.22115	2.16411	1.11221	2.34509	0.861274	0.824833	1.15809	2.02397	1.53046	1.67816	1.84752
	-1.31418	-0.876189	-0.621732	-0.512744	-0.261732	-0.255999	-0.333628	-0.162548	-1.08837	-0.223782	-0.0801592	-0.208755	-0.220947	-0.914091	-2.21415	-1.28945	-1.34183	2.84608	1.25009	2.19638	1.2558	0.614403	1.38508	1.32265	3.12427	2.36418	1.78215	2.57228	1.67765	1.74286	2.3443	1.59017	1.34467	2.12461	1.20084	1.15231	2.36859	1.84766	0.773919	0.277103	0.0589604	0.215134	0.48043	0.506406	0.984985	1.73713	0.997851	-1.75884	-0.114935
	-0.333628	-0.162548	-1.08837	-0.223782	-0.0801592	-0.208755	-0.220947	-0.914091	-2.21415	-1.28945	-1.34183	2.84608	1.25009	2.19638	1.2558	0.614403	1.38508	1.32265	3.12427	2.36418	1.78215	2.57228	1.67765	1.74286	2.3443	1.59017	1.34467	2.12461	1.20084	1.15231	2.36859	1.84766	0.773919	0.277103	0.0589604	0.215134	0.48043	0.506406	0.984985	1.73713	0.997851	-1.75884	-0.114935	-1.27521	-2.98267	-1.56096	-0.613755	-0.447874	-0.211211
	-0.226218	-1.33914	-2.05012	-1.99685	-1.44825	-0.985195	-0.85937	-0.297044	-0.56009	-0.0232562	-0.135704	-0.00404125	-0.161072	-0.121611	-0.127097	-0.37528	-0.380493	-0.265171	-0.403484	-0.392472	-1.36983	-0.650937	-0.653312	-1.83514	-1.02731	-0.12548	0.841317	2.04494	2.30032	0.905713	0.877572	0.826547	1.73417	1.73662	1.52867	0.99433	1.13825	3.34534	2.31363	2.63245	2.19628	0.707709	2.06641	2.30337	1.45846	1.96165	2.58351	1.90613	1.43824
	1.93389	1.1362	2.02943	1.6289	2.5415	2.17728	1.64701	1.74079	2.37029	1.09099	2.7936	1.30103	1.02979	1.4359	2.05429	2.28182	0.643185	1.27051	1.58034	3.4742	1.4483	1.07842	0.565462	0.338578	1.02986	1.07892	2.70739	1.42623	1.29089	1.17632	2.13148	2.36922	1.39178	1.47771	3.08192	1.77033	2.94545	1.91309	1.23118	0.800233	2.07054	0.903721	1.06826	0.977231	1.61279	1.11622	3.93652	2.70203	0.460015
	1.61279	1.11622	3.93652	2.70203	0.460015	2.24411	2.09625	2.49595	3.35097	0.788244	2.56045	3.11407	1.95978	1.47068	1.3421	2.60422	2.97185	3.30105	0.780446	1.14917	2.43514	0.287551	1.32011	0.671804	0.919401	0.79319	9.90796	2.85485	2.26849	1.36858	1.68022	1.64776	2.03966	2.34411	1.86416	2.86933	2.39185	1.75127	0.80042	2.00323	2.00875	1.5663	1.18528	1.33112	-1.15796	-0.600924	-0.567965	-0.836745	-0.220857
	2.43514	0.287551	1.32011	0.671804	0.919401	0.79319	9.90796	2.85485	2.26849	1.36858	1.68022	1.64776	2.03966	2.34411	1.86416	2.86933	2.39185	1.75127	0.80042	2.00323	2.00875	1.5663	1.18528	1.33112	-1.15796	-0.600924	-0.567965	-0.836745	-0.220857	-0.135253	-0.31732	-0.43811	-0.629791	-1.31987	-0.893698	-0.974885	-1.39897	1.52908	1.49301	1.954	1.10193	1.58677	1.64327	0.930574	1.82827	1.92675	1.39228	1.10155	0.644002
	2.0529	2.92492	1.80805	1.30132	1.39294	2.6873	3.53562	1.51537	1.26865	1.37208	3.37447	2.57764	2.96105	1.89693	1.04975	2.16626	1.76851	1.83084	1.14672	3.54984	2.77402	2.25232	2.64226	1.5171	0.628714	3.10656	4.53221	1.70368	1.77592	1.9707	1.20514	1.50308	2.82991	2.95825	2.18359	1.18986	1.14572	3.5515	2.52277	2.12105	1.51616	1.33678	1.98685	2.18511	0.532787	2.3513	2.53686	2.29164	2.96355
	2.50529	-2.28073	-1.62904	-1.33735	-1.13201	-0.438244	-1.76712	-2.58814	-1.33931	-3.1944	-2.14169	-0.990947	-1.46951	-1.76471	-2.00508	-1.57387	-0.903544	-1.29019	-1.30312	-1.81118	-1.65818	-0.88485	-0.118776	-0.717274	-0.547764	-0.514554	-0.311486	-0.974678	-0.438705	-0.92221	-1.17261	-0.713805	-2.09113	-2.48469	-2.19622	-1.64058	-0.640176	0.293104	1.68038	2.18608	2.98656	2.82371	2.02503	1.12347	1.74212	1.9795	0.767892	1.93367	3.08987
	-1.88536	0.610981	2.81964	3.5205	1.22243	1.46685	3.39529	1.65459	1.36654	0.467278	1.1336	0.787178	1.51337	1.77579	2.74689	3.27418	2.77612	1.50906	2.10396	0.966913	1.82844	0.904862	1.62539	1.65007	4.346	3.49762	1.2951	1.63535	2.5147	2.46544	1.60601	1.03772	2.46035	0.361993	4.0388	2.04474	1.41362	1.48192	1.03447	1.65479	1.79102	1.7321	3.40021	1.34807	1.06875	3.21603	3.42289	2.65972	1.58706
	2.00342	1.46083	3.61291	1.91482	2.5557	1.77053	1.02198	0.263184	1.37603	2.08583	1.75334	2.22348	1.9817	0.808274	0.897861	1.71883	0.829608	1.47021	2.80818	2.22897	1.34573	2.07974	1.98232	1.2999	1.86993	1.81431	2.36647	2.63608	2.69476	1.15216	1.45635	2.94713	3.19132	2.25606	1.11049	1.5098	1.19366	1.6166	1.33137	2.2528	0.806197	-1.23511	-1.43065	-1.13711	-0.349681	-0.352099	-3.71296	-0.607895	-0.9129
	1.98232	1.2999	1.86993	1.81431	2.36647	2.63608	2.69476	1.15216	1.45635	2.94713	3.19132	2.25606	1.11049	1.5098	1.19366	1.6166	1.33137	2.2528	0.806197	-1.23511	-1.43065	-1.13711	-0.349681	-0.352099	-3.71296	-0.607895	-0.9129	0.253574	0.746735	1.56441	1.38162	1.66962	1.76115	2.54448	1.32719	0.979212	1.52189	2.64559	2.97618	2.02844	0.4931	0.167165	1.57995	1.03353	1.74139	2.17216	3.14181	2.01871	1.57695
	1.19366	1.6166	1.33137	2.2528	0.806197	-1.23511	-1.43065	-1.13711	-0.349681	-0.352099	-3.71296	-0.607895	-0.9129	0.253574	0.746735	1.56441	1.38162	1.66962	1.76115	2.54448	1.32719	0.979212	1.52189	2.64559	2.97618	2.02844	0.4931	0.167165	1.57995	1.03353	1.74139	2.17216	3.14181	2.01871	1.57695	1.05355	2.71287	2.73904	1.96339	2.08387	2.44445	2.11389	2.22669	2.37654	2.77981	1.92327	1.13111	1.49592	1.12659
	1.76115	2.54448	1.32719	0.979212	1.52189	2.64559	2.97618	2.02844	0.4931	0.167165	1.57995	1.03353	1.74139	2.17216	3.14181	2.01871	1.57695	1.05355	2.71287	2.73904	1.96339	2.08387	2.44445	2.11389	2.22669	2.37654	2.77981	1.92327	1.13111	1.49592	1.12659	2.11701	2.06204	1.39697	1.58924	2.42787	1.8025	1.7898	2.99114	2.27599	1.31741	-1.37533	-2.44711	-0.293804	-1.10506	-0.610509	-0.701858	-0.788473	-1.0938
	-0.655157	-0.0691589	-1.12968	-1.39119	-1.19983	-1.68491	-1.35191	-0.431188	1.87454	2.31172	2.09515	1.38929	2.11523	2.6526	1.68072	2.01344	1.00502	2.92822	3.27405	2.35533	2.39492	1.49281	1.78267	2.90449	1.64145	2.10206	0.7535	0.638004	1.6098	1.83447	2.31779	1.7791	0.795248	2.26777	2.17989	2.83364	1.55383	1.2025	1.15671	2.05362	2.90766	2.17623	2.47841	1.98132	2.12333	0.108716	1.95335	3.09364	2.09315
	2.6526	1.68072	2.01344	1.00502	2.92822	3.27405	2.35533	2.39492	1.49281	1.78267	2.90449	1.64145	2.10206	0.7535	0.638004	1.6098	1.83447	2.31779	1.7791	0.795248	2.26777	2.17989	2.83364	1.55383	1.2025	1.15671	2.05362	2.90766	2.17623	2.47841	1.98132	2.12333	0.108716	1.95335	3.09364	2.09315	2.16506	2.60742	2.89672	1.9358	1.44487	2.46403	2.19628	1.85784	2.44294	3.68308	1.64245	1.51117	2.77214
	1.78267	2.90449	1.64145	2.10206	0.7535	0.638004	1.6098	1.83447	2.31779	1.7791	0.795248	2.26777	2.17989	2.83364	1.55383	1.2025	1.15671	2.05362	2.90766	2.17623	2.47841	1.98132	2.12333	0.108716	1.95335	3.09364	2.09315	2.16506	2.60742	2.89672	1.9358	1.44487	2.46403	2.19628	1.85784	2.44294	3.68308	1.64245	1.51117	2.77214	1.80286	1.97002	2.6503	2.07274	2.85806	1.95317	1.82781	1.68301	1.93201
	-1.82384	-1.86302	-2.10802	-3.19017	-3.2202	-1.10035	-2.47248	-1.33717	-1.75835	-0.996668	-1.73411	-2.37467	-3.05622	-1.67769	-1.35313	-0.492992	-0.777593	-1.87685	-1.23956	-0.126382	-0.392091	-0.491954	-0.094879	-0.378995	-1.34657	-2.11376	-2.16047	1.60792	0.890155	1.26621	2.19511	1.57232	1.69684	2.44596	2.48726	2.15426	1.58627	0.934804	2.73143	1.6957	2.50699	-2.19391	-1.99167	-2.26642	-1.61674	-0.163559	-1.59322	4.30699	1.4872
	-1.73411	-2.37467	-3.05622	-1.67769	-1.35313	-0.492992	-0.777593	-1.87685	-1.23956	-0.126382	-0.392091	-0.491954	-0.094879	-0.378995	-1.34657	-2.11376	-2.16047	1.60792	0.890155	1.26621	2.19511	1.57232	1.69684	2.44596	2.48726	2.15426	1.58627	0.934804	2.73143	1.6957	2.50699	-2.19391	-1.99167	-2.26642	-1.61674	-0.163559	-1.59322	4.30699	1.4872	2.22402	1.99755	1.63719	1.72869	1.27611	2.02755	1.65855	0.817138	0.369012	0.564412
	-0.491954	-0.094879	-0.378995	-1.34657	-2.11376	-2.16047	1.60792	0.890155	1.26621	2.19511	1.57232	1.69684	2.44596	2.48726	2.15426	1.58627	0.934804	2.73143	1.6957	2.50699	-2.19391	-1.99167	-2.26642	-1.61674	-0.163559	-1.59322	4.30699	1.4872	2.22402	1.99755	1.63719	1.72869	1.27611	2.02755	1.65855	0.817138	0.369012	0.564412	1.07589	0.416604	0.414253	0.767054	2.38042	1.6802	1.70252	2.98314	3.01636	2.03763	2.66459
	3.3167	1.33949	0.500646	2.09431	4.67663	2.67747	1.43827	-1.22263	-1.98434	-2.82513	-1.07561	-0.897689	-0.087055	-0.872281	-0.403385	-1.27744	-0.500717	-0.310569	-1.54774	-1.31351	-1.14243	-2.86972	-1.79619	-2.13469	-1.56448	-1.97541	-2.03237	0.777522	0.331787	0.217611	0.199243	0.294208	1.17457	0.607552	0.488132	2.88038	2.48003	2.00241	1.17682	2.7808	2.90679	-1.24513	-0.899197	-3.07687	-0.162297	-2.11578	-0.888097	-1.52059	-1.28888
	2.30092	2.99857	2.01148	2.1841	1.82009	1.74337	2.30333	1.09336	2.79546	3.39918	2.15999	1.96386	0.916853	2.31347	2.30426	2.03791	3.53691	1.86012	2.51441	3.07909	2.24584	2.18502	2.86813	2.30216	1.80477	1.77212	0.58264	0.411868	1.41906	2.60651	1.46353	1.35299	2.26712	1.70996	1.93751	2.07955	2.27253	3.04361	2.09888	1.66898	2.54505	3.2066	2.15582	1.93274	3.3565	2.85111	2.26575	0.556911	3.12516
	2.26712	1.70996	1.93751	2.07955	2.27253	3.04361	2.09888	1.66898	2.54505	3.2066	2.15582	1.93274	3.3565	2.85111	2.26575	0.556911	3.12516	4.29034	2.15733	1.90186	2.09001	3.79046	1.93855	2.33926	1.35305	2.41266	4.45487	2.20011	2.03994	2.39716	2.42547	2.12697	2.41698	1.86878	2.01913	1.95852	2.78641	2.49588	2.06035	2.15302	2.18642	3.27558	1.8473	2.12173	2.72895	2.77099	2.77891	2.27182	2.07874
	0.678171	2.81131	2.0347	2.5875	2.54165	1.39629	1.28389	1.18168	1.27961	1.57532	1.49666	1.20474	1.43809	1.22239	2.87123	2.42622	1.83736	1.32365	3.03271	3.43277	1.84092	1.58997	1.97006	2.49124	3.15616	2.59655	1.91507	1.7657	1.30765	2.76447	1.82629	1.37364	1.19111	2.03469	1.19666	1.15968	2.59888	1.70812	1.12528	2.02143	2.01805	-1.46224	-1.80874	-2.81344	-1.96728	-2.91346	-1.35236	-1.97005	-2.8606
	-1.35236	-1.97005	-2.8606	-2.58348	-1.72111	-0.122727	-1.224	-2.28156	-2.19604	-2.57331	-1.7559	-1.72913	-2.06504	-1.58458	-2.06457	-1.74088	-1.88527	-1.8663	-0.785371	-1.38444	-1.55254	-1.77152	-0.552689	-0.916319	-0.452929	-0.142038	-0.259329	-1.75371	-1.36845	-2.09977	-1.6253	3.40153	1.63289	2.68629	2.73348	1.27055	0.799545	3.00784	2.05754	3.05663	1.36168	2.02364	2.96513	1.15424	2.1014	3.13689	2.79907	1.36181	3.42645
	-0.122727	-1.224	-2.28156	-2.19604	-2.57331	-1.7559	-1.72913	-2.06504	-1.58458	-2.06457	-1.74088	-1.88527	-1.8663	-0.785371	-1.38444	-1.55254	-1.77152	-0.552689	-0.916319	-0.452929	-0.142038	-0.259329	-1.75371	-1.36845	-2.09977	-1.6253	3.40153	1.63289	2.68629	2.73348	1.27055	0.799545	3.00784	2.05754	3.05663	1.36168	2.02364	2.96513	1.15424	2.1014	3.13689	2.79907	1.36181	3.42645	2.69534	2.53712	1.97245	2.36156	2.65429
	1.88004	1.15439	2.98673	4.55965	1.39626	1.81856	2.94306	3.25332	1.86219	2.63904	2.03798	1.69859	2.78819	2.20673	3.96469	2.56482	2.45498	2.19814	2.665	2.40832	1.90567	1.82079	2.65797	2.33597	1.28051	3.29309	2.28869	2.63622	2.09448	4.4146	3.66642	1.54851	2.75198	2.92705	3.81474	1.4371	2.08628	1.56712	2.45382	2.32921	2.6852	-1.74578	-1.88697	-1.33665	-0.696997	-1.15412	-1.45347	-0.719988	-0.713745
	-1.3569	-1.95659	-2.97617	-1.2315	-1.50717	-0.805182	-1.73729	-1.11512	-1.0818	-1.58355	-0.908549	-0.540943	-0.64066	-0.355278	-0.543686	-0.570764	-1.79639	-3.13781	2.00879	2.07069	3.09267	2.32207	1.58729	1.80051	2.80832	2.56641	2.23579	1.54243	2.4968	2.70287	2.08215	1.60951	1.74776	2.91267	1.87784	2.97416	1.53466	1.7615	2.34363	2.65904	2.73022	-1.8502	-2.09715	-1.76963	-2.82227	-1.78165	-1.24358	-1.40456	1.06333
	2.00879	2.07069	3.09267	2.32207	1.58729	1.80051	2.80832	2.56641	2.23579	1.54243	2.4968	2.70287	2.08215	1.60951	1.74776	2.91267	1.87784	2.97416	1.53466	1.7615	2.34363	2.65904	2.73022	-1.8502	-2.09715	-1.76963	-2.82227	-1.78165	-1.24358	-1.40456	1.06333	0.665909	1.36145	2.82215	2.03072	1.98921	2.85235	2.07609	2.45549	2.23599	1.02094	-1.62481	-0.998324	-0.813088	-0.946586	-0.425059	-1.31169	-1.41805	-0.398203
	2.73022	-1.8502	-2.09715	-1.76963	-2.82227	-1.78165	-1.24358	-1.40456	1.06333	0.665909	1.36145	2.82215	2.03072	1.98921	2.85235	2.07609	2.45549	2.23599	1.02094	-1.62481	-0.998324	-0.813088	-0.946586	-0.425059	-1.31169	-1.41805	-0.398203	-0.403486	-0.744878	-0.646469	-0.652666	-0.766065	-0.17658	-2.33193	-2.10614	-1.65017	-1.68852	2.13467	2.19391	3.04657	2.05576	1.5647	2.44793	1.30902	3.38852	2.30999	1.76776	2.42915	2.43994
	2.60714	2.00342	1.69541	3.91416	2.87629	2.15619	2.0707	3.86169	2.58339	2.31226	2.59725	0.674533	3.20714	2.25008	2.84038	1.13884	2.10958	4.17766	1.84076	1.61117	1.5744	4.02057	3.89729	2.55337	1.86077	1.71578	2.90198	2.80993	2.33651	2.53431	2.63142	2.84406	1.41347	2.50775	1.5186	1.37095	1.00844	1.68104	2.39456	1.78484	1.51104	2.86849	3.03356	1.35497	1.82405	2.85778	2.5164	2.96921	1.52879
	3.79196	2.33417	1.93912	2.01556	2.05884	2.1639	2.03706	0.32542	2.61695	3.06362	2.4573	1.63868	4.18295	2.68944	1.80388	1.77749	3.2725	3.29369	0.632575	1.61898	2.55679	2.28871	2.83725	1.60615	1.54843	2.59734	2.47511	2.24062	2.59151	1.84299	1.94956	2.50322	2.08957	3.18374	3.09776	2.25796	2.82088	2.03544	1.91208	1.97783	2.8016	3.41656	2.12492	2.32713	2.95842	2.61673	2.72666	1.7103	1.56843
	2.1639	2.03706	0.32542	2.61695	3.06362	2.4573	1.63868	4.18295	2.68944	1.80388	1.77749	3.2725	3.29369	0.632575	1.61898	2.55679	2.28871	2.83725	1.60615	1.54843	2.59734	2.47511	2.24062	2.59151	1.84299	1.94956	2.50322	2.08957	3.18374	3.09776	2.25796	2.82088	2.03544	1.91208	1.97783	2.8016	3.41656	2.12492	2.32713	2.95842	2.61673	2.72666	1.7103	1.56843	2.58911	1.80494	2.71742	1.98302	2.58972
	NaN	NaN	NaN	NaN	NaN	NaN	NaN	NaN	NaN	NaN	NaN	NaN	NaN	NaN	NaN	NaN	NaN	NaN	NaN	NaN	NaN	NaN	NaN	NaN	NaN	NaN	NaN	NaN	0.94028	1.93429	2.07404	1.85952	1.01849	5.78048	0.230475	0.814709	1.20866	7.85905	1.36791	1.55977	1.36984	2.08666	1.54168	1.88694	1.88658	2.15092	8.54319	0.750817	1.47502
	NaN	NaN	NaN	NaN	NaN	NaN	0.94028	1.93429	2.07404	1.85952	1.01849	5.78048	0.230475	0.814709	1.20866	7.85905	1.36791	1.55977	1.36984	2.08666	1.54168	1.88694	1.88658	2.15092	8.54319	0.750817	1.47502	1.16553	0.452218	1.05766	1.71908	0.432836	1.6741	2.74009	2.26821	2.89544	2.40594	2.13396	2.39233	2.76715	2.07562	3.54684	1.5727	3.68886	-3.08169	-1.47684	-2.01696	-1.26414	-0.89137
	1.55917	2.71309	2.06455	2.17146	2.35223	0.919006	1.32978	1.34682	2.22958	3.75606	1.58028	0.962783	-2.81266	-2.18167	-2.51274	-0.448994	-0.384773	-0.165602	-0.332051	-3.46102	-3.61029	-2.32087	-1.02595	-1.59799	-3.60554	-3.69269	-0.989164	2.28388	3.84698	1.82855	1.65856	2.17694	3.20816	3.4268	4.28626	0.894249	3.71082	3.40954	2.14995	2.11996	1.70352	-1.77864	-4.71659	-4.41778	-1.40299	-2.29006	-1.5544	-1.31931	-1.3794
	2.14019	2.4097	1.07861	2.14711	3.48631	2.85807	2.12844	1.70601	2.04848	1.50668	2.1454	0.890962	2.13584	3.75583	2.92545	0.349066	3.1527	3.23712	2.77658	2.76086	4.02461	2.13077	2.23754	3.69291	2.33559	1.29861	1.02743	1.13674	1.61908	2.57184	2.11268	2.35128	3.20182	2.61876	2.34957	3.12653	4.03216	2.0001	1.54566	2.18721	1.20954	2.28083	2.14231	2.50279	1.23677	3.45079	1.43202	3.36671	3.34285
	2.76086	4.02461	2.13077	2.23754	3.69291	2.33559	1.29861	1.02743	1.13674	1.61908	2.57184	2.11268	2.35128	3.20182	2.61876	2.34957	3.12653	4.03216	2.0001	1.54566	2.18721	1.20954	2.28083	2.14231	2.50279	1.23677	3.45079	1.43202	3.36671	3.34285	2.30929	1.13456	2.04261	2.59734	1.35679	2.54481	1.18266	0.81958	0.444905	0.78711	2.15174	1.22604	2.74944	2.55489	2.13012	2.24878	3.77524	3.01814	2.00504
	2.30929	1.13456	2.04261	2.59734	1.35679	2.54481	1.18266	0.81958	0.444905	0.78711	2.15174	1.22604	2.74944	2.55489	2.13012	2.24878	3.77524	3.01814	2.00504	1.8953	2.32244	-1.89884	-1.54403	-0.319089	-1.01455	-0.113026	-3.00694	2.47818	3.02384	2.17539	1.24094	1.87822	0.883137	2.61026	3.17717	1.6409	1.00603	1.23135	1.41561	1.41175	1.72931	0.212095	0.686086	-0.421563	-2.48336	-1.99403	-2.6067	-3.87191	-1.53249
	2.63096	2.2522	2.73995	2.39431	4.24251	2.7304	1.76305	2.44204	1.91488	2.99	5.0692	2.25933	1.8584	2.03866	1.80342	2.28228	2.2103	-2.85411	-1.22303	-1.71874	-1.94851	-0.489902	-0.52181	-0.523556	-1.14858	-0.817679	-2.46732	-2.15512	3.86253	2.63152	2.56966	2.39441	1.64379	2.63773	1.9767	2.88816	2.4221	2.6462	2.63254	1.75651	2.61083	2.88474	2.23162	1.77681	2.72948	2.43891	1.22018	3.73669	3.83641
	2.88474	2.23162	1.77681	2.72948	2.43891	1.22018	3.73669	3.83641	3.7115	1.52231	2.2273	4.64764	3.2592	2.5364	1.29428	3.08944	3.39568	2.49589	1.68147	2.84291	4.33366	2.12052	0.963364	0.632167	0.857883	1.09517	1.13134	1.4561	0.803743	2.75932	3.08845	2.12951	1.91513	2.44551	3.35901	2.73525	2.71152	3.48382	2.03847	2.88389	1.84685	3.0989	3.28097	2.2	-1.52693	-3.67873	-0.388604	-3.52313	-4.29895
	1.84685	3.0989	3.28097	2.2	-1.52693	-3.67873	-0.388604	-3.52313	-4.29895	-1.40092	-3.28614	-3.42308	-2.84322	-1.38738	-1.48429	-1.84086	-1.66246	-2.30555	-0.709865	-0.578075	-0.747512	-0.497733	-0.367356	-0.794757	-1.87333	-1.68881	2.78075	2.5419	2.79378	2.09041	3.58824	2.42063	3.04306	3.59555	2.02657	1.93284	2.28575	2.55047	1.68397	2.76242	2.64044	3.02634	2.82328	1.00029	1.80474	4.07897	3.25421	4.08971	2.91479
	2.41717	3.07388	-4.73931	-2.65639	-1.51458	-0.82379	-0.212948	-1.1615	-3.49951	-3.80422	-2.96603	-2.56171	-5.24566	-1.65804	-3.41212	-1.80442	-2.39375	-1.71111	-2.61011	-2.05851	-0.823142	-0.615622	-0.802787	-1.31436	-0.41885	-1.03501	-0.734461	-1.31753	-1.72608	-1.65879	-0.6231	1.08884	1.71446	0.706748	1.65542	1.8063	1.72221	1.43477	2.02855	1.66505	3.36096	3.15324	2.84047	3.13164	2.59809	1.34324	2.67533	3.7065	3.00613
	1.66505	3.36096	3.15324	2.84047	3.13164	2.59809	1.34324	2.67533	3.7065	3.00613	1.18051	2.4124	3.1899	3.04482	2.97457	3.10247	2.4517	2.68978	2.78304	3.54842	2.13808	2.51978	2.50807	4.2879	2.18196	1.83042	2.2256	5.51605	3.44495	2.19232	4.18401	4.32761	1.4091	1.16881	0.9283	0.781637	1.30534	1.98896	1.37079	1.58897	0.825753	-0.785077	-2.01394	-2.08829	-4.26039	-2.89169	-2.27219	-2.65755	-3.35261
	2.12088	1.74211	1.35333	2.4388	-3.49999	-5.47454	-2.19406	-0.276752	-3.95154	-2.4289	1.51055	1.5798	1.36068	1.93588	0.899009	0.987723	1.92729	2.08681	4.26399	2.46219	2.12094	2.16159	5.70879	-2.34273	-3.20829	-3.40549	-4.98586	-2.56121	-2.25892	-1.31329	-3.56739	3.16993	2.09299	0.608166	1.8762	3.04097	2.66944	2.24923	3.48825	4.79063	2.69498	2.66491	2.79405	1.77203	3.66009	3.85432	3.13062	3.09979	-0.861893
	-5.23548	-4.40187	-1.5638	-2.00169	-4.72282	-3.77889	-0.939654	-1.99932	-4.24122	-1.71954	-1.5579	-2.38627	-1.16864	-1.02921	-2.36615	-2.14883	-1.8013	-1.8693	-4.07626	-3.09677	-2.09909	-2.20883	-2.62565	-4.10521	-2.57086	-4.02026	-2.16	-2.21885	-3.6905	-3.92803	-1.7881	-1.84786	-1.88078	-2.93394	-2.46146	-0.33491	2.04238	1.33372	3.29475	2.24397	3.45952	3.55298	3.04353	3.73173	3.97001	1.66018	1.51305	3.77319	3.91202
	3.45952	3.55298	3.04353	3.73173	3.97001	1.66018	1.51305	3.77319	3.91202	4.63318	2.74435	2.15593	3.38527	3.79431	3.97509	2.09835	2.9119	4.54345	3.38657	1.5455	2.33327	1.02217	2.73118	3.7589	4.53021	2.68547	2.34958	2.2578	3.85048	5.24776	2.65932	2.49013	2.66792	2.18582	2.01277	3.11242	2.44215	2.89741	2.95973	2.77711	3.09621	4.34209	3.14298	2.49779	4.08432	1.60902	2.25681	1.76862	2.52126
	-4.10818	-2.16918	-2.37602	-2.14577	-1.85102	-1.66964	-1.57834	-2.49093	-4.26275	-1.53868	-3.31205	-3.52813	-2.46196	-1.33303	-1.24822	-3.07628	-1.2645	-1.54723	-0.664523	-1.74815	-0.644727	-0.079834	-0.0612811	-0.282438	-0.741179	-0.95566	-0.832162	-1.99819	-2.92676	-1.62935	1.91555	5.57672	4.0286	2.70679	3.17953	3.79557	2.83722	4.31486	2.57941	3.31878	3.23943	2.32778	4.21403	2.33175	2.68841	3.06118	3.661	2.62752	2.79974
	-0.95566	-0.832162	-1.99819	-2.92676	-1.62935	1.91555	5.57672	4.0286	2.70679	3.17953	3.79557	2.83722	4.31486	2.57941	3.31878	3.23943	2.32778	4.21403	2.33175	2.68841	3.06118	3.661	2.62752	2.79974	2.16282	3.02042	3.50467	1.63294	-1.23362	-0.691168	-3.38845	-4.24068	-2.17193	-0.858772	-3.8929	-3.01273	-2.41277	1.88799	3.11507	4.84391	2.04884	2.84025	4.11281	2.86807	2.75342	2.86363	3.65923	2.97813	2.68929
	5.57672	4.0286	2.70679	3.17953	3.79557	2.83722	4.31486	2.57941	3.31878	3.23943	2.32778	4.21403	2.33175	2.68841	3.06118	3.661	2.62752	2.79974	2.16282	3.02042	3.50467	1.63294	-1.23362	-0.691168	-3.38845	-4.24068	-2.17193	-0.858772	-3.8929	-3.01273	-2.41277	1.88799	3.11507	4.84391	2.04884	2.84025	4.11281	2.86807	2.75342	2.86363	3.65923	2.97813	2.68929	2.7311	3.34561	3.10702	2.60795	3.12142	2.84932
	2.20867	2.76495	4.31987	4.09232	1.80139	2.70261	4.58681	3.65331	2.50012	5.52176	2.42793	1.34485	2.69092	3.65945	4.58632	2.51423	3.50728	4.40773	3.15858	3.30124	4.34	3.22883	2.71007	2.59623	2.19022	5.82016	2.33663	1.40123	3.11172	2.6189	4.20292	2.90299	1.94338	3.18815	4.80441	2.75211	2.92226	2.7181	4.07863	3.37878	3.34046	2.99587	4.80314	3.30048	2.96288	2.50627	2.84164	2.82729	2.42537
	2.69092	3.65945	4.58632	2.51423	3.50728	4.40773	3.15858	3.30124	4.34	3.22883	2.71007	2.59623	2.19022	5.82016	2.33663	1.40123	3.11172	2.6189	4.20292	2.90299	1.94338	3.18815	4.80441	2.75211	2.92226	2.7181	4.07863	3.37878	3.34046	2.99587	4.80314	3.30048	2.96288	2.50627	2.84164	2.82729	2.42537	2.72119	2.31634	3.65655	2.55664	3.21218	3.73103	3.52681	1.90297	2.23489	4.4382	3.0983	2.31166
	3.72787	5.89632	2.73802	2.49071	3.85761	4.32481	3.15799	2.56301	2.9261	-1.71959	-2.41586	-4.61285	-3.9564	-1.88037	-1.18271	-1.1719	-0.191118	-0.254802	-0.129326	-0.24408	-0.17373	-1.02565	2.54343	5.09375	2.19984	2.41891	1.12012	2.39453	3.47887	4.91057	1.52664	3.65461	4.12179	3.43251	2.39456	2.00316	4.52059	2.82944	3.10919	3.43112	3.19471	3.92811	3.82717	2.39388	3.23245	3.80119	4.42622	3.96497	3.27643
	-0.812752	-0.794774	-1.76745	-3.1234	-3.04912	1.48846	3.03964	3.18528	3.98846	4.7819	4.30902	3.7898	3.17689	4.36808	4.07155	2.96695	-1.59699	-1.99949	-1.38021	-2.0549	-2.6292	-0.756756	-0.770347	-0.641996	5.18851	3.40258	3.31967	1.7329	1.14358	3.90103	5.84748	3.11273	2.62482	1.39316	2.19732	2.81952	4.55151	2.56132	1.00108	2.53789	3.25455	-2.61174	-2.07362	-3.95209	-0.261503	-3.87267	-2.78779	-0.501439	-2.93191
	-4.48915	-2.41763	-1.86331	-2.24671	-1.84137	-1.96625	-3.2235	-3.66663	-4.60016	-5.08419	-2.8249	-1.83083	-2.02105	-3.24624	-1.26685	-1.71418	-3.36102	-0.504408	-1.12291	-1.34042	-0.400209	-0.265917	-0.736309	-2.11259	-1.87624	-2.24979	-4.1274	-1.83967	1.97539	1.25999	2.92003	6.3544	1.66429	2.01241	3.03921	2.70902	7.55363	1.73133	1.08491	1.0559	1.45052	-0.365969	-0.352477	-1.30168	-2.94431	-2.33825	-1.40598	-1.35743	-2.39022
	-0.365969	-0.352477	-1.30168	-2.94431	-2.33825	-1.40598	-1.35743	-2.39022	2.78063	4.49262	4.24172	1.58466	3.05614	3.25338	3.8324	2.12958	3.22873	3.95205	3.6262	1.26828	2.54776	5.17088	3.07724	2.47771	3.85558	2.61801	3.59614	3.28465	4.37469	2.01357	2.67941	2.12022	3.25341	2.8303	4.83645	3.13309	2.60607	2.1358	4.53768	1.51126	3.56529	3.76014	3.00238	2.58358	2.77384	3.24566	3.78973	4.14364	3.5558
	NaN	NaN	NaN	NaN	NaN	NaN	NaN	NaN	NaN	NaN	1.8855	3.35991	2.21686	0.924577	1.30068	1.25975	3.2101	2.61386	1.32294	1.74256	1.43612	3.49086	1.24591	1.73866	3.02761	2.17646	1.89118	1.14724	2.36416	1.4319	2.28412	1.79843	1.37035	1.7332	1.52609	2.45187	2.77999	1.03586	1.88106	2.34713	2.07053	2.32314	2.38822	1.06026	1.3166	3.59809	2.77785	1.3397	0.473923
	1.25975	3.2101	2.61386	1.32294	1.74256	1.43612	3.49086	1.24591	1.73866	3.02761	2.17646	1.89118	1.14724	2.36416	1.4319	2.28412	1.79843	1.37035	1.7332	1.52609	2.45187	2.77999	1.03586	1.88106	2.34713	2.07053	2.32314	2.38822	1.06026	1.3166	3.59809	2.77785	1.3397	0.473923	3.34605	3.10353	1.85221	1.95621	2.05219	1.44052	1.10371	-0.822836	-1.26711	-1.26794	-1.53076	-1.23533	-0.994698	-0.353577	-3.67266
	3.0969	1.6422	1.01171	1.62732	3.52199	2.89606	2.10836	2.17819	2.41244	3.57139	0.70864	1.84454	4.37972	3.96376	1.65747	1.71971	2.60815	2.89351	2.06233	1.57981	0.347768	2.46259	-3.56805	-0.569505	-0.274791	-0.953066	-0.043237	-0.659794	-2.14219	1.05613	1.96859	2.45546	3.15097	3.50694	2.60147	1.81685	1.37696	2.34754	1.40547	1.7118	1.45123	0.834431	0.0933461	0.517435	0.538588	1.11032	2.80086	2.00638	1.77218
	2.45439	2.55642	2.16956	1.08495	3.45302	0.992536	2.5418	1.00981	2.62152	1.43956	1.28222	-2.02298	-1.43332	-2.42269	-2.30306	-0.522902	-1.79297	-3.23228	-2.57475	-2.16687	-3.29164	-3.35303	-1.98898	-1.27531	-1.08738	-1.61563	-2.25991	-0.610325	-0.816125	-0.631915	-0.178912	-1.8607	3.77162	1.65266	1.34216	1.88026	1.67644	1.7676	1.68893	3.21385	3.5053	2.35143	1.93675	1.22432	3.74387	4.09874	1.48229	1.61294	4.1989
	0.760254	2.32353	2.13454	4.53989	1.22842	1.92954	2.75866	1.93438	1.74792	1.81552	0.397297	1.82156	1.76245	1.33984	1.58825	1.19753	1.14097	2.07085	1.0383	0.257263	1.94029	1.66906	2.61034	2.53003	1.21716	1.22458	2.0922	2.27454	1.3869	0.43161	0.288744	1.3953	1.76026	0.373253	2.33211	2.16342	2.09901	1.3036	1.80373	2.03863	1.81219	2.96763	1.70769	2.7969	3.65711	2.07227	1.54072	1.15961	2.71692
	2.96763	1.70769	2.7969	3.65711	2.07227	1.54072	1.15961	2.71692	2.52689	2.43787	1.35006	-0.896523	-2.46861	-3.70828	-1.50112	-0.656026	-0.507297	-0.0530606	-0.422167	-1.81891	-2.44267	-3.59685	-2.22572	-2.47019	-3.59977	-2.69312	-1.68499	-0.0741956	-0.226808	-0.401345	-0.676648	-0.518332	-0.915512	-2.11275	-2.38985	-2.06218	2.93861	2.65956	1.71099	1.37424	1.94358	3.5087	3.41081	2.20871	2.48688	1.78117	3.05922	3.24452	3.21678
	1.03232	3.07088	1.05807	2.77772	2.62652	1.7567	2.47339	0.893907	3.92306	3.07789	-2.58704	-1.63214	-1.76007	-1.74436	-3.47147	-0.777492	-0.196851	-0.121475	-1.71726	-2.614	-3.99646	-2.28594	-3.24228	-2.38082	-2.46675	-2.35296	-3.24498	-2.72894	-1.89062	-0.203834	-0.54926	-0.733373	-0.591583	-0.505185	-1.98263	-1.54106	-1.32631	1.15661	1.87186	3.17697	2.59153	1.75173	1.29486	2.42126	3.2625	1.1122	1.03063	1.5045	1.96924
	2.29108	3.20058	1.58585	4.11967	0.997681	2.68553	4.75697	2.4796	-2.00691	-1.60925	-1.53649	-2.99394	-3.18477	-1.11418	-0.0249006	-3.03574	-4.5867	-2.00756	-1.35212	-4.38864	-3.6517	-1.39944	-0.976199	-2.77525	-2.82118	-0.644627	-0.444902	-0.705947	-0.68531	-1.0778	-1.1525	-2.09184	-2.24898	-2.4003	-2.47086	-2.73476	-1.87494	2.25406	1.27756	1.61127	3.44735	2.51066	1.8621	3.48058	1.89212	2.25797	2.74214	3.61489	0.940706
	-0.69965	-0.739976	-1.09479	-0.337001	-0.408013	-2.17534	-3.26969	-3.96006	-2.14712	-2.43812	-3.08487	-2.66977	-1.29216	-0.542157	-0.222207	-1.04673	-0.186722	-1.27192	-1.77401	-1.6855	2.8866	1.47345	2.92834	2.70839	0.829256	2.13799	2.49979	2.54796	1.94205	2.29432	2.87931	2.9804	2.81876	2.34036	2.71533	2.22061	2.38023	1.38639	2.14826	1.88574	4.25227	2.33085	2.06566	3.67594	1.61476	2.56565	3.28296	2.12173	3.14227
	2.11178	3.86503	2.1959	3.86521	2.32695	-1.21906	-1.489	-3.04009	-2.68209	-1.32311	-1.67122	-1.06517	-1.56532	-0.64439	-0.351313	-4.36603	-4.57459	-2.29457	-2.62287	-2.27623	-0.386884	-2.64572	-0.409888	-0.924279	-2.02227	-0.794711	-1.91257	-2.2477	-2.28515	-2.99937	4.15223	2.87939	1.62104	3.59209	2.07754	1.53473	4.39254	3.21276	2.03864	2.60929	2.88912	2.46417	1.70496	3.71089	2.87559	2.3776	0.590864	1.14145	2.0086
	-1.21906	-1.489	-3.04009	-2.68209	-1.32311	-1.67122	-1.06517	-1.56532	-0.64439	-0.351313	-4.36603	-4.57459	-2.29457	-2.62287	-2.27623	-0.386884	-2.64572	-0.409888	-0.924279	-2.02227	-0.794711	-1.91257	-2.2477	-2.28515	-2.99937	4.15223	2.87939	1.62104	3.59209	2.07754	1.53473	4.39254	3.21276	2.03864	2.60929	2.88912	2.46417	1.70496	3.71089	2.87559	2.3776	0.590864	1.14145	2.0086	1.9707	1.82571	1.78909	1.54922	3.63247
	-1.67122	-1.06517	-1.56532	-0.64439	-0.351313	-4.36603	-4.57459	-2.29457	-2.62287	-2.27623	-0.386884	-2.64572	-0.409888	-0.924279	-2.02227	-0.794711	-1.91257	-2.2477	-2.28515	-2.99937	4.15223	2.87939	1.62104	3.59209	2.07754	1.53473	4.39254	3.21276	2.03864	2.60929	2.88912	2.46417	1.70496	3.71089	2.87559	2.3776	0.590864	1.14145	2.0086	1.9707	1.82571	1.78909	1.54922	3.63247	1.76164	2.03858	3.64541	3.90009	1.62695
	2.46417	1.70496	3.71089	2.87559	2.3776	0.590864	1.14145	2.0086	1.9707	1.82571	1.78909	1.54922	3.63247	1.76164	2.03858	3.64541	3.90009	1.62695	3.34498	3.06392	2.93438	2.75941	2.56964	2.40698	3.25635	2.70867	1.40559	1.65461	4.43207	2.91157	1.65667	1.27976	4.95639	3.0329	2.20356	2.07304	1.64717	3.38592	1.65802	0.862987	0.092724	0.401729	1.2174	2.00855	1.46525	2.38907	2.35261	2.66403	0.996327
	0.590864	1.14145	2.0086	1.9707	1.82571	1.78909	1.54922	3.63247	1.76164	2.03858	3.64541	3.90009	1.62695	3.34498	3.06392	2.93438	2.75941	2.56964	2.40698	3.25635	2.70867	1.40559	1.65461	4.43207	2.91157	1.65667	1.27976	4.95639	3.0329	2.20356	2.07304	1.64717	3.38592	1.65802	0.862987	0.092724	0.401729	1.2174	2.00855	1.46525	2.38907	2.35261	2.66403	0.996327	3.06909	1.90531	0.357179	2.1577	4.67708
	NaN	NaN	NaN	NaN	NaN	NaN	NaN	NaN	NaN	NaN	NaN	NaN	1.21926	0.702558	0.554725	1.31694	1.94883	1.01158	1.25562	1.17878	1.43995	1.40976	0.957212	0.407286	0.612263	2.41223	6.79427	1.01798	1.38663	2.86648	2.29186	2.48944	1.64478	1.02626	1.65265	1.93545	1.64915	1.42328	1.61078	2.15639	1.76342	1.66683	2.81914	3.74615	1.55675	1.83646	1.36967	3.05383	2.67608
	1.38663	2.86648	2.29186	2.48944	1.64478	1.02626	1.65265	1.93545	1.64915	1.42328	1.61078	2.15639	1.76342	1.66683	2.81914	3.74615	1.55675	1.83646	1.36967	3.05383	2.67608	0.938272	0.709872	1.62102	1.17456	1.3823	1.69114	1.1763	1.40866	0.0503973	0.424038	1.04602	1.54617	1.98823	2.13354	2.37392	0.787368	2.00859	1.2954	1.76485	1.79258	0.781236	1.05053	3.0274	1.4755	1.38345	0.981446	1.89686	2.99455
	1.76342	1.66683	2.81914	3.74615	1.55675	1.83646	1.36967	3.05383	2.67608	0.938272	0.709872	1.62102	1.17456	1.3823	1.69114	1.1763	1.40866	0.0503973	0.424038	1.04602	1.54617	1.98823	2.13354	2.37392	0.787368	2.00859	1.2954	1.76485	1.79258	0.781236	1.05053	3.0274	1.4755	1.38345	0.981446	1.89686	2.99455	1.20341	1.1444	0.174599	0.916761	0.271025	-0.625182	-0.381445	-0.207891	-0.21383	-0.395675	-0.396631	-0.977577
	1.04602	1.54617	1.98823	2.13354	2.37392	0.787368	2.00859	1.2954	1.76485	1.79258	0.781236	1.05053	3.0274	1.4755	1.38345	0.981446	1.89686	2.99455	1.20341	1.1444	0.174599	0.916761	0.271025	-0.625182	-0.381445	-0.207891	-0.21383	-0.395675	-0.396631	-0.977577	-0.744308	-1.87567	-1.78851	-2.33706	-1.66464	1.26465	1.74254	2.53237	1.79349	1.95178	2.14592	1.14596	0.854584	1.10404	2.24501	2.28186	1.91061	1.31589	1.08656
	0.787368	2.00859	1.2954	1.76485	1.79258	0.781236	1.05053	3.0274	1.4755	1.38345	0.981446	1.89686	2.99455	1.20341	1.1444	0.174599	0.916761	0.271025	-0.625182	-0.381445	-0.207891	-0.21383	-0.395675	-0.396631	-0.977577	-0.744308	-1.87567	-1.78851	-2.33706	-1.66464	1.26465	1.74254	2.53237	1.79349	1.95178	2.14592	1.14596	0.854584	1.10404	2.24501	2.28186	1.91061	1.31589	1.08656	1.92796	1.78742	3.12948	2.43575	1.04529
	2.07843	2.8572	1.77872	1.67798	0.511378	1.64357	2.17017	1.20244	1.27147	1.46588	1.54814	1.72412	0.727051	1.60335	2.45487	2.31582	3.61776	1.52519	2.2007	1.07006	1.24561	2.39812	2.17266	1.85166	1.65469	2.27033	3.3035	2.14234	0.853161	1.86911	1.29803	2.13034	2.11355	1.56314	2.13327	1.28023	1.06924	1.66765	0.806794	2.1697	1.03923	-2.38127	-2.37711	-2.35238	-3.17483	-1.74629	-1.32942	-0.371274	-2.40462
	0.806794	2.1697	1.03923	-2.38127	-2.37711	-2.35238	-3.17483	-1.74629	-1.32942	-0.371274	-2.40462	-1.80316	-2.68849	-3.70598	-3.10827	-1.03762	-2.31501	-1.64535	-1.80252	-1.63396	-1.68912	-0.326789	-0.163908	-0.176768	-0.264113	-1.09089	-1.46292	-0.762067	-1.6755	2.44475	2.26873	1.83432	1.58788	0.932096	1.67913	2.18735	3.63348	1.48282	1.14254	1.15595	1.67229	2.6829	1.26079	2.3709	1.58179	1.99303	-0.22055	-0.897311	-1.76065
	4.07162	2.49868	1.21897	3.35116	3.33001	2.58627	1.43323	2.73767	3.39872	2.19377	2.22317	1.61841	2.02903	2.75788	3.18213	2.06983	2.19828	1.77755	2.59916	2.09848	2.05361	1.99331	1.47346	3.93782	2.08481	2.01091	2.20098	1.92359	1.36251	2.55714	1.69674	1.17207	1.98794	1.92101	1.92021	1.53705	3.11128	1.49419	1.91662	2.51809	1.3992	2.10827	1.04777	2.35926	2.01551	2.50543	2.07968	1.26814	2.393
	2.08481	2.01091	2.20098	1.92359	1.36251	2.55714	1.69674	1.17207	1.98794	1.92101	1.92021	1.53705	3.11128	1.49419	1.91662	2.51809	1.3992	2.10827	1.04777	2.35926	2.01551	2.50543	2.07968	1.26814	2.393	3.04365	2.91454	1.69487	2.04991	2.0835	2.15324	2.93168	2.305	2.53499	2.13362	0.881899	3.27008	2.75701	1.25388	2.71629	1.328	2.37787	1.77036	1.12172	0.985358	1.64851	2.48782	1.04261	2.00342
	2.53373	1.44505	3.34733	1.01498	2.65407	2.54091	2.20581	2.18254	2.15725	3.28291	2.25353	1.56773	1.57344	2.92982	3.77576	2.09992	1.59519	2.22208	2.66565	1.29954	1.90985	2.57602	2.86621	2.61401	0.959214	1.95498	1.07409	3.55895	2.5154	1.42179	2.0207	0.671329	1.73286	3.24693	1.49712	1.96646	2.09705	3.05687	1.58372	1.10506	2.30303	2.20287	1.87354	0.87848	1.90652	2.52605	1.16871	2.18466	1.27026
	1.89069	2.40092	1.76817	2.04995	0.762228	2.35948	3.71011	1.72424	2.15244	1.58328	2.25469	3.16444	1.316	2.11924	2.34023	2.3577	1.63874	1.95484	3.85535	1.7241	1.09148	3.21565	1.88455	2.40184	0.881157	3.3572	1.65572	0.54254	2.02871	1.98979	1.90243	0.928632	1.46839	1.5142	3.40803	3.35137	2.18297	2.05029	1.59946	1.07192	2.33858	1.55845	0.996082	0.391019	0.923639	1.66945	0.859878	2.95606	4.40061
	1.3666	-2.13828	-0.735014	-2.37869	-1.15169	-2.02187	-1.41739	-2.36404	-1.2302	-3.21689	-1.0898	-0.825075	-1.52351	-4.7156	-3.2794	-2.01493	-1.09344	-0.651026	-1.41337	-2.7645	-1.31594	-1.65278	-1.04451	-1.62891	-2.84556	-0.599572	-0.506537	-0.351955	-0.404314	-0.402688	-0.692607	-0.10918	-0.647642	-3.10346	1.67241	1.59822	2.78679	1.45207	3.36537	2.1586	2.27003	1.92786	1.84659	2.97227	1.26092	2.3411	2.31912	5.70183	1.62428
	2.73042	3.3698	2.83542	2.93928	2.40362	3.05397	2.80401	1.81921	2.41187	2.59688	4.20236	1.47723	2.2666	2.84908	4.37146	2.17377	2.18742	3.4058	2.50051	1.90653	2.50028	1.90872	3.91339	2.42225	2.22861	2.45933	3.86399	2.58168	2.22087	2.783	4.0378	1.61383	2.32892	1.40921	2.84811	2.09128	2.94081	2.89974	1.93078	1.71593	2.18772	3.50985	2.59568	2.63142	2.06407	2.20616	1.87039	2.69655	2.83482
	2.84811	2.09128	2.94081	2.89974	1.93078	1.71593	2.18772	3.50985	2.59568	2.63142	2.06407	2.20616	1.87039	2.69655	2.83482	2.42413	1.59638	1.09851	4.66465	2.32904	1.97605	1.31456	1.88863	2.92612	2.93742	2.09112	1.38276	2.38408	1.77954	3.5426	2.37785	1.88714	1.83624	2.33392	1.0033	1.3659	1.52286	0.986502	1.09842	0.797137	2.35934	2.06151	1.56825	1.80691	3.17321	1.70521	2.82205	2.64495	1.21954
	2.73329	2.59321	1.89593	3.18278	2.48409	3.00723	2.70785	3.43673	1.91678	1.63403	2.30976	4.24616	2.07655	1.65677	2.3653	3.90648	2.125	1.38693	1.69765	1.71633	3.20972	3.06659	2.06478	2.5382	1.65444	3.80293	3.45486	2.04275	2.0559	1.43192	3.52956	3.18441	2.3952	1.63849	2.15462	1.54339	2.84568	2.45956	1.30246	1.37445	2.57641	2.94961	3.55904	3.14614	2.68471	2.01742	1.11573	1.9737	0.529029
	-0.73444	-1.06525	-1.25597	-1.08608	-1.36057	-2.65769	-2.48508	-3.78859	-1.80568	-1.95794	-3.28558	-1.69596	-2.7462	-2.00649	-4.47321	-2.92208	-1.92858	-2.78542	-0.983962	-3.32979	-2.10244	-1.18411	-0.812081	-0.419837	-0.26196	-0.426062	-0.162703	-0.241321	-0.468971	-0.884901	-0.507144	-2.15456	1.7498	1.71912	2.9826	2.96183	3.60964	1.85196	1.34125	1.73794	3.1145	2.7255	2.26325	2.33447	1.54982	2.77954	2.61718	4.29505	2.40806
	1.93447	2.17943	3.0343	2.52699	1.50201	2.1748	0.940545	1.37029	3.66285	1.63887	2.95021	1.44283	3.07709	3.8093	2.4389	2.98958	1.86231	2.52033	3.24778	2.68321	3.01167	3.35253	2.2539	1.91719	2.22776	4.42581	2.39791	1.62705	2.14168	1.45003	1.73521	1.58653	3.45284	1.22745	1.99895	1.42881	1.9667	3.43765	2.46047	1.83302	1.43044	2.78467	2.67406	2.56492	3.04952	2.70838	1.66007	1.36533	0.563924
	NaN	NaN	NaN	NaN	NaN	NaN	NaN	NaN	NaN	NaN	NaN	NaN	NaN	NaN	NaN	NaN	NaN	NaN	NaN	0.482931	0.850125	1.11322	0.546435	0.530116	0.643252	1.28502	1.22981	0.267948	0.893473	0.56129	0.514031	0.253536	0.607349	1.17933	0.433384	0.339872	0.980282	1.20212	0.849263	2.69558	0.501969	0.730916	0.65954	0.446805	0.399022	1.14301	0.338869	0.790715	0.758798
	0.643252	1.28502	1.22981	0.267948	0.893473	0.56129	0.514031	0.253536	0.607349	1.17933	0.433384	0.339872	0.980282	1.20212	0.849263	2.69558	0.501969	0.730916	0.65954	0.446805	0.399022	1.14301	0.338869	0.790715	0.758798	0.195344	0.0974696	1.03373	1.74118	0.806658	2.98304	2.08237	1.92849	1.74492	1.44309	1.65486	2.00474	1.47126	0.625959	1.88435	1.07459	-1.34123	-2.21501	-0.513149	-0.555228	-1.03285	-0.875606	-1.15377	-0.237394
	2.10038	3.75558	1.67049	0.969288	2.55422	2.91115	1.46451	1.34943	1.69741	1.02829	2.43366	1.78083	3.23554	0.914569	0.783825	0.9211	2.54025	2.04037	1.5727	1.48982	0.550406	1.08291	0.453041	0.386191	0.800646	2.75187	1.98966	1.50164	2.66089	2.30413	0.93871	1.80897	1.97445	0.934546	1.32743	0.513438	0.904238	0.7382	1.49591	2.05094	1.12046	1.8707	0.826265	1.85897	1.05607	0.755246	0.35911	0.547409	0.852543
	1.34943	1.69741	1.02829	2.43366	1.78083	3.23554	0.914569	0.783825	0.9211	2.54025	2.04037	1.5727	1.48982	0.550406	1.08291	0.453041	0.386191	0.800646	2.75187	1.98966	1.50164	2.66089	2.30413	0.93871	1.80897	1.97445	0.934546	1.32743	0.513438	0.904238	0.7382	1.49591	2.05094	1.12046	1.8707	0.826265	1.85897	1.05607	0.755246	0.35911	0.547409	0.852543	0.344734	0.151631	1.11668	-1.36967	-1.49047	-0.182602	-0.793164
	1.80897	1.97445	0.934546	1.32743	0.513438	0.904238	0.7382	1.49591	2.05094	1.12046	1.8707	0.826265	1.85897	1.05607	0.755246	0.35911	0.547409	0.852543	0.344734	0.151631	1.11668	-1.36967	-1.49047	-0.182602	-0.793164	-0.545424	-1.78671	0.315467	1.36586	0.839499	1.06509	1.22591	2.31247	0.589831	1.18103	2.2553	1.34861	0.258031	1.57386	1.84956	1.54822	-0.814064	-1.15017	-2.0439	-0.743836	-1.81004	-0.361124	-0.886695	-1.17424
	-1.15017	-2.0439	-0.743836	-1.81004	-0.361124	-0.886695	-1.17424	-0.144921	-0.321271	-0.759141	-0.46362	-0.839032	-2.15532	-1.08251	-0.230641	-0.330727	-0.250205	-0.18387	-0.74374	-0.439601	-0.242705	-0.601807	-0.40608	-1.50144	-0.999884	-1.69514	-1.45435	1.63758	1.11632	1.83849	2.20727	2.29059	1.76561	0.909997	1.49499	2.54368	2.97469	1.32212	0.392025	1.60524	3.1213	1.77259	1.4613	1.27492	1.75021	0.899876	1.24338	1.09653	-0.349263
	2.66919	0.816108	0.971091	1.08889	2.11901	0.46651	0.900887	1.41942	2.52342	1.3834	0.882389	0.892563	3.62149	2.77203	0.656839	1.18846	1.0741	0.411138	1.72299	2.98218	0.276171	0.866366	0.662749	1.68453	0.690555	3.70746	1.92757	1.04598	0.423665	0.864201	2.20408	2.98001	1.65387	0.924149	1.35588	1.2643	1.6861	0.56476	1.2511	1.6532	2.45615	0.892542	-0.573593	-0.118145	-0.178463	-0.819366	-0.116343	-0.141214	-0.463134
	0.866366	0.662749	1.68453	0.690555	3.70746	1.92757	1.04598	0.423665	0.864201	2.20408	2.98001	1.65387	0.924149	1.35588	1.2643	1.6861	0.56476	1.2511	1.6532	2.45615	0.892542	-0.573593	-0.118145	-0.178463	-0.819366	-0.116343	-0.141214	-0.463134	-0.762519	-1.13485	-0.47028	1.09928	1.16137	1.35663	0.884388	0.716625	0.49917	0.0663164	0.317695	1.61998	0.977235	-0.147137	-0.43261	-0.092827	-0.432082	-0.340564	-0.591062	-0.278464	-0.512085
	0.808935	0.354318	-0.545056	-0.901859	-1.16847	-1.24884	-0.0415678	-1.92515	-0.262716	-1.58769	-2.93317	-2.83123	-2.47704	-1.66638	-1.90278	-1.47307	-2.38048	-0.275302	-0.574567	-0.599983	-0.507873	-0.190481	-0.357352	-0.263705	-0.413016	-0.405821	-1.91797	0.210281	2.77532	1.0974	1.37651	0.819688	0.99914	2.64445	2.12549	1.61853	0.585624	1.23153	1.82502	2.51369	0.909162	0.16775	1.26682	1.30868	2.81884	2.47923	1.85437	0.373531	0.551327
	-0.262716	-1.58769	-2.93317	-2.83123	-2.47704	-1.66638	-1.90278	-1.47307	-2.38048	-0.275302	-0.574567	-0.599983	-0.507873	-0.190481	-0.357352	-0.263705	-0.413016	-0.405821	-1.91797	0.210281	2.77532	1.0974	1.37651	0.819688	0.99914	2.64445	2.12549	1.61853	0.585624	1.23153	1.82502	2.51369	0.909162	0.16775	1.26682	1.30868	2.81884	2.47923	1.85437	0.373531	0.551327	-1.28719	-4.6361	-0.879515	-0.92407	-0.483526	-0.236051	-0.642874	-0.87473
	2.81884	2.47923	1.85437	0.373531	0.551327	-1.28719	-4.6361	-0.879515	-0.92407	-0.483526	-0.236051	-0.642874	-0.87473	-0.934254	-0.126622	-0.360037	-0.267608	-0.366689	-0.742558	-0.723366	-0.55261	-0.696808	-0.903256	-0.727281	-2.48911	-1.43436	0.351817	2.25953	3.27555	1.75634	0.987205	1.04146	0.971617	0.701189	1.59182	0.767041	0.763614	2.1657	1.01742	0.669554	1.12332	0.223836	1.8304	0.852844	3.0051	1.80208	0.537609	0.993601	0.64992
	-0.236051	-0.642874	-0.87473	-0.934254	-0.126622	-0.360037	-0.267608	-0.366689	-0.742558	-0.723366	-0.55261	-0.696808	-0.903256	-0.727281	-2.48911	-1.43436	0.351817	2.25953	3.27555	1.75634	0.987205	1.04146	0.971617	0.701189	1.59182	0.767041	0.763614	2.1657	1.01742	0.669554	1.12332	0.223836	1.8304	0.852844	3.0051	1.80208	0.537609	0.993601	0.64992	0.821814	2.39897	0.82144	1.64117	1.62703	1.00728	0.264137	1.04638	1.33415	0.658814
	-0.903256	-0.727281	-2.48911	-1.43436	0.351817	2.25953	3.27555	1.75634	0.987205	1.04146	0.971617	0.701189	1.59182	0.767041	0.763614	2.1657	1.01742	0.669554	1.12332	0.223836	1.8304	0.852844	3.0051	1.80208	0.537609	0.993601	0.64992	0.821814	2.39897	0.82144	1.64117	1.62703	1.00728	0.264137	1.04638	1.33415	0.658814	0.80438	0.364252	0.443038	0.202347	-0.393565	-0.973251	-0.46213	-0.432855	-0.288959	-0.172927	-0.464232	-1.10783
	1.33415	0.658814	0.80438	0.364252	0.443038	0.202347	-0.393565	-0.973251	-0.46213	-0.432855	-0.288959	-0.172927	-0.464232	-1.10783	-0.711929	-0.423004	-0.0318104	-1.95114	-0.996396	-0.700639	0.611807	1.66674	1.68825	1.59818	1.10357	0.664929	0.265471	2.06506	2.75437	1.94335	1.26456	0.446557	1.46626	1.07741	0.5459	1.40787	0.122018	1.35361	1.17065	0.947461	0.734013	0.102523	2.15992	1.97504	2.36021	-0.995966	-0.601691	-0.596122	-1.07668
	-0.562735	-0.663318	-0.156516	-0.283583	-0.283141	-0.25002	-1.28159	-2.52633	-4.72804	-0.83976	-2.58921	-1.22849	-1.94984	-2.1676	-1.58383	-1.79197	-0.243259	-1.26261	-0.996043	-0.114079	-0.229678	-0.0618038	-1.08918	-0.884039	0.790093	0.767211	2.11252	0.217743	1.20149	2.3053	1.56389	1.86235	1.02227	0.207794	1.9181	4.30926	0.765191	1.83236	2.53967	1.82151	1.03658	0.320241	1.89652	1.07456	1.77126	2.19489	1.24237	0.190089	2.32184
	-2.58921	-1.22849	-1.94984	-2.1676	-1.58383	-1.79197	-0.243259	-1.26261	-0.996043	-0.114079	-0.229678	-0.0618038	-1.08918	-0.884039	0.790093	0.767211	2.11252	0.217743	1.20149	2.3053	1.56389	1.86235	1.02227	0.207794	1.9181	4.30926	0.765191	1.83236	2.53967	1.82151	1.03658	0.320241	1.89652	1.07456	1.77126	2.19489	1.24237	0.190089	2.32184	1.78867	0.25348	0.215481	-0.445113	-2.91707	-2.92949	-0.502588	-0.45591	-0.866266	-0.674732
	-2.92949	-0.502588	-0.45591	-0.866266	-0.674732	-1.32848	-0.941446	-1.45002	-0.960388	-1.30881	-3.13962	-0.115977	-1.0128	-1.18043	-2.66152	-4.75881	-0.794962	-2.19494	-1.77073	-1.93745	-1.29236	-1.92862	-1.2777	-0.381921	-0.408765	-0.731491	-0.283334	-0.48069	-0.29596	-1.01122	-0.616103	-0.371139	-0.894546	-1.72741	2.39293	1.68979	1.3365	0.404606	1.1539	1.77996	1.15634	0.118919	0.968397	1.15373	1.09931	0.837348	0.382162	0.709818	3.75267
	-0.29596	-1.01122	-0.616103	-0.371139	-0.894546	-1.72741	2.39293	1.68979	1.3365	0.404606	1.1539	1.77996	1.15634	0.118919	0.968397	1.15373	1.09931	0.837348	0.382162	0.709818	3.75267	2.05531	3.27059	1.28144	0.800134	2.11115	1.55957	1.51681	2.10815	2.97066	2.25654	1.16807	1.30353	2.44036	2.04269	0.550022	2.99512	1.9981	1.52289	1.23606	2.72949	0.969224	1.6698	1.00641	0.182084	2.76779	0.975653	0.658276	1.0072
	1.15634	0.118919	0.968397	1.15373	1.09931	0.837348	0.382162	0.709818	3.75267	2.05531	3.27059	1.28144	0.800134	2.11115	1.55957	1.51681	2.10815	2.97066	2.25654	1.16807	1.30353	2.44036	2.04269	0.550022	2.99512	1.9981	1.52289	1.23606	2.72949	0.969224	1.6698	1.00641	0.182084	2.76779	0.975653	0.658276	1.0072	1.46745	1.97324	0.908527	1.46	0.997735	3.16079	1.90631	1.64319	2.91462	0.751383	3.14802	1.12856
	0.975653	0.658276	1.0072	1.46745	1.97324	0.908527	1.46	0.997735	3.16079	1.90631	1.64319	2.91462	0.751383	3.14802	1.12856	1.87987	2.38062	1.69113	1.56007	2.36509	0.481967	2.34965	1.69236	1.24961	1.16467	1.70404	0.873314	2.05508	1.63713	2.11153	1.81524	0.910256	0.922415	1.24587	0.840394	1.95613	3.21284	1.88556	0.879639	1.13661	1.73416	2.07743	0.890201	1.83408	1.26011	1.19831	1.97917	0.729461	0.0179982
	0.997735	3.16079	1.90631	1.64319	2.91462	0.751383	3.14802	1.12856	1.87987	2.38062	1.69113	1.56007	2.36509	0.481967	2.34965	1.69236	1.24961	1.16467	1.70404	0.873314	2.05508	1.63713	2.11153	1.81524	0.910256	0.922415	1.24587	0.840394	1.95613	3.21284	1.88556	0.879639	1.13661	1.73416	2.07743	0.890201	1.83408	1.26011	1.19831	1.97917	0.729461	0.0179982	0.816852	0.958039	1.44668	2.08548	2.06964	1.54542	2.3702
	1.63713	2.11153	1.81524	0.910256	0.922415	1.24587	0.840394	1.95613	3.21284	1.88556	0.879639	1.13661	1.73416	2.07743	0.890201	1.83408	1.26011	1.19831	1.97917	0.729461	0.0179982	0.816852	0.958039	1.44668	2.08548	2.06964	1.54542	2.3702	1.38528	1.17775	1.13177	1.7204	0.270621	0.404641	1.53049	1.23903	2.03418	1.05998	1.18288	0.441557	0.511981	0.153804	1.23205	1.6637	0.991072	1.10608	0.869077	0.991238	0.731239
	2.07743	0.890201	1.83408	1.26011	1.19831	1.97917	0.729461	0.0179982	0.816852	0.958039	1.44668	2.08548	2.06964	1.54542	2.3702	1.38528	1.17775	1.13177	1.7204	0.270621	0.404641	1.53049	1.23903	2.03418	1.05998	1.18288	0.441557	0.511981	0.153804	1.23205	1.6637	0.991072	1.10608	0.869077	0.991238	0.731239	0.899333	2.11054	1.31829	1.73078	0.927665	0.24201	0.958195	1.9556	2.12006	2.0088	1.45732	1.253	1.17478
	1.23903	2.03418	1.05998	1.18288	0.441557	0.511981	0.153804	1.23205	1.6637	0.991072	1.10608	0.869077	0.991238	0.731239	0.899333	2.11054	1.31829	1.73078	0.927665	0.24201	0.958195	1.9556	2.12006	2.0088	1.45732	1.253	1.17478	0.292025	0.345089	1.11401	1.22269	0.551905	0.422161	0.457082	0.587008	1.50131	1.37957	0.344589	0.196534	1.55751	1.43533	0.172825	1.81416	1.85016	0.550159	0.561224	1.36056	0.565652	0.61475
	1.73078	0.927665	0.24201	0.958195	1.9556	2.12006	2.0088	1.45732	1.253	1.17478	0.292025	0.345089	1.11401	1.22269	0.551905	0.422161	0.457082	0.587008	1.50131	1.37957	0.344589	0.196534	1.55751	1.43533	0.172825	1.81416	1.85016	0.550159	0.561224	1.36056	0.565652	0.61475	1.33785	0.794794	1.08582	0.618509	0.732669	1.14699	0.89411	1.19612	0.384107	0.678222	0.558754	0.115123	0.371908	0.124943	1.45972	1.61377	1.20419
	0.292025	0.345089	1.11401	1.22269	0.551905	0.422161	0.457082	0.587008	1.50131	1.37957	0.344589	0.196534	1.55751	1.43533	0.172825	1.81416	1.85016	0.550159	0.561224	1.36056	0.565652	0.61475	1.33785	0.794794	1.08582	0.618509	0.732669	1.14699	0.89411	1.19612	0.384107	0.678222	0.558754	0.115123	0.371908	0.124943	1.45972	1.61377	1.20419	1.21067	1.40694	0.643411	0.268188	0.129073	1.23959	1.04896	0.999157	0.576094	1.41859
	1.55751	1.43533	0.172825	1.81416	1.85016	0.550159	0.561224	1.36056	0.565652	0.61475	1.33785	0.794794	1.08582	0.618509	0.732669	1.14699	0.89411	1.19612	0.384107	0.678222	0.558754	0.115123	0.371908	0.124943	1.45972	1.61377	1.20419	1.21067	1.40694	0.643411	0.268188	0.129073	1.23959	1.04896	0.999157	0.576094	1.41859	3.12593	0.776395	0.788451	0.604691	0.19412	0.480968	-0.590307	-0.952731	-1.04988	-1.59242	-1.54854	-0.663563
	-0.167446	-1.07974	-4.08816	-0.824124	-1.49459	-1.52915	-2.19063	-1.47226	-1.76176	-0.89096	-1.81189	-0.947315	-1.36691	-1.00903	-1.16799	-1.31494	-1.13312	-0.52785	-0.547062	-0.512641	-0.159141	-0.465	-0.541081	-0.560894	-0.870404	-1.00127	-0.59379	-0.759697	-0.245731	-0.328639	-1.02046	1.87424	0.160448	0.475755	0.5188	0.905549	1.13734	1.22836	1.21932	1.52965	0.808243	0.201167	0.138613	0.815187	0.595797	0.0698242	0.51207	0.233271	0.671553
	-2.99468	-2.35923	-1.17144	-1.6907	-0.516139	-2.05092	-3.35896	-2.05914	-1.25237	-1.42541	-2.15265	-1.34056	-1.28469	-2.14871	-2.06414	-1.3187	-0.995767	-1.02409	-0.119142	-0.752199	-0.765831	-0.253648	-0.363132	-0.252553	-0.589562	-0.769115	-0.431999	-1.16186	1.06916	1.1775	0.580206	0.38527	1.04045	1.28435	0.807445	0.657759	1.09721	0.71151	0.393771	0.146172	0.82952	-0.911249	-2.07352	-0.966808	-0.646827	-1.73097	-0.902947	-0.649828	-1.41571
	-1.21499	-0.2566	-0.296728	-1.11298	-1.49662	-0.816361	-1.3187	-1.84597	-0.177758	-0.290319	-0.216855	-0.600305	-2.31134	-2.08308	-1.36831	-2.02001	-1.47836	-1.45616	-1.77723	-1.41305	-0.572553	-1.38258	-0.0671196	-0.827337	-0.802872	-0.231859	-0.342227	-0.356166	-0.711662	-0.664287	0.414455	0.387897	0.753345	0.520853	1.37297	0.613014	0.131364	0.647985	0.252597	0.318992	0.736465	0.379773	0.19219	2.23332	1.09112	2.46834	1.83829	0.729271	0.360187
	-0.356166	-0.711662	-0.664287	0.414455	0.387897	0.753345	0.520853	1.37297	0.613014	0.131364	0.647985	0.252597	0.318992	0.736465	0.379773	0.19219	2.23332	1.09112	2.46834	1.83829	0.729271	0.360187	0.615182	0.822407	1.82748	2.97263	1.54836	0.830058	0.633507	0.434151	0.341675	0.804272	2.27961	1.238	1.37273	1.03088	0.530239	0.898899	2.10186	1.81919	0.990243	-1.17411	-0.505526	-0.457236	-0.133471	-0.311591	-0.424807	-0.686301	-1.19648
	-0.457236	-0.133471	-0.311591	-0.424807	-0.686301	-1.19648	-0.286511	-1.16914	-1.99608	-1.18475	-2.85219	-1.6697	-1.63464	-2.12285	-1.63583	-0.948168	-1.4161	-0.966561	-0.274182	-0.942339	-0.559267	-1.07103	-0.87329	-1.02851	-0.599213	-0.0816672	2.92846	1.36987	1.77254	1.14546	0.802297	0.511174	1.68604	1.95433	0.442011	1.98595	2.11941	1.23867	0.796715	1.09635	1.56209	1.56264	1.94663	0.728044	0.779428	1.28239	0.779196	1.87023	0.380945
	-1.63583	-0.948168	-1.4161	-0.966561	-0.274182	-0.942339	-0.559267	-1.07103	-0.87329	-1.02851	-0.599213	-0.0816672	2.92846	1.36987	1.77254	1.14546	0.802297	0.511174	1.68604	1.95433	0.442011	1.98595	2.11941	1.23867	0.796715	1.09635	1.56209	1.56264	1.94663	0.728044	0.779428	1.28239	0.779196	1.87023	0.380945	0.350392	3.29202	2.9993	0.431412	0.618767	0.472328	-0.269987	-2.29437	-1.21911	-0.245011	-0.69685	-0.386103	-0.379343	-0.0949192
	0.617459	1.12074	0.370847	1.10933	0.357401	0.92406	1.72539	0.851325	0.592587	1.21283	2.72056	1.08204	1.12635	0.995555	1.10223	0.523517	1.8084	1.66335	0.416489	0.912706	0.757359	0.434861	0.693021	-0.286576	-1.62595	-0.737512	-0.441777	-0.22189	-0.170711	-0.959242	-0.417818	-0.567148	-0.605755	0.80887	2.31117	1.31596	1.68933	1.6315	0.78443	1.41862	1.67879	0.0289201	2.10126	2.01515	0.952368	1.47494	-0.926527	-1.01542	-1.40804
	0.274219	1.4208	0.912076	0.70063	1.56179	1.72931	0.794157	1.55903	0.344971	1.44866	1.74444	1.48992	1.50002	0.984679	0.715792	1.69749	1.13146	0.231348	0.406397	0.278501	0.55907	0.636807	0.442969	2.59198	2.72632	0.670756	1.34342	1.49159	0.709316	1.20484	1.61218	0.860489	1.21889	1.55717	0.439572	1.28789	2.27868	0.447496	0.663674	0.081397	1.28308	-1.74547	-1.16251	-0.138376	-1.51243	-1.29372	-0.507151	-1.75406	-1.51796
	-0.651156	-0.277107	-0.562001	-0.798337	-0.466741	-1.01299	-1.91378	-2.81928	-0.934918	-1.5526	-2.13394	-1.35182	-1.65992	-0.869153	-1.55841	-1.28385	-0.951287	-1.55769	-0.417755	-0.0576963	-0.453358	-0.576464	-0.236756	-0.600869	-0.226899	-0.534221	-0.200635	-1.02303	0.866228	0.380859	0.898942	0.945081	0.531428	1.0341	2.16776	1.91603	0.671002	1.91279	0.768725	1.47334	1.65204	-0.21857	-1.10353	-2.22555	-0.847017	-1.00555	-0.26454	-0.498291	-0.616615
	0.0532098	1.43335	1.73745	1.78878	1.14709	1.5393	0.876014	0.403547	0.194192	1.23951	1.63465	1.1168	1.00722	1.73639	0.692253	1.27506	2.73305	1.72133	1.56777	1.16543	1.05383	2.01358	1.61474	0.730258	0.550696	0.461121	2.13757	2.59875	1.32854	0.479954	0.363137	1.13939	1.93098	0.983886	2.17544	0.83073	1.40798	2.8147	1.0501	0.737882	0.415765	-0.693365	-1.08855	-1.59224	-1.29147	-0.195798	-0.817952	-1.03621	-0.645598
	2.32165	1.46292	4.31689	1.89817	2.51071	4.06338	1.27102	2.48896	2.43997	4.35445	0.842309	1.71001	2.42969	3.26496	0.895418	2.81853	1.45127	2.80311	2.23016	0.31981	0.968946	1.95895	1.85779	3.67198	1.24994	1.0374	1.64961	1.14501	2.3057	0.87749	2.91407	2.95334	2.08132	2.16763	1.18274	1.76872	1.94043	2.18065	1.52851	1.9083	1.55332	-0.724429	-0.797655	-1.24107	-0.609555	-0.561383	-0.515387	-0.0668484	-1.05446
	1.30127	2.27946	1.71385	1.80057	1.27597	0.0997822	0.321441	2.0614	2.32863	0.471046	0.269405	1.91946	1.29137	1.52157	0.707086	1.68305	2.75086	1.37416	0.19228	1.14944	1.68937	2.20967	1.50366	1.23528	0.799838	0.50248	0.649514	1.49879	1.78083	1.06076	0.293225	0.537656	0.840911	0.425818	0.34121	0.339846	0.314498	0.368047	0.169396	0.0957732	0.163256	0.167748	0.322348	0.174193	0.139691	0.548863	0.296611	0.827389	0.0705837
	1.68305	2.75086	1.37416	0.19228	1.14944	1.68937	2.20967	1.50366	1.23528	0.799838	0.50248	0.649514	1.49879	1.78083	1.06076	0.293225	0.537656	0.840911	0.425818	0.34121	0.339846	0.314498	0.368047	0.169396	0.0957732	0.163256	0.167748	0.322348	0.174193	0.139691	0.548863	0.296611	0.827389	0.0705837	0.373955	0.215329	0.641013	0.494585	0.34742	0.617955	0.43666	0.179892	0.1635	0.118716	0.201889	0.267807	0.0282413	0.0724786	0.102652
	1.23528	0.799838	0.50248	0.649514	1.49879	1.78083	1.06076	0.293225	0.537656	0.840911	0.425818	0.34121	0.339846	0.314498	0.368047	0.169396	0.0957732	0.163256	0.167748	0.322348	0.174193	0.139691	0.548863	0.296611	0.827389	0.0705837	0.373955	0.215329	0.641013	0.494585	0.34742	0.617955	0.43666	0.179892	0.1635	0.118716	0.201889	0.267807	0.0282413	0.0724786	0.102652	0.507165	0.524761	0.273546	0.316085	0.0113087	0.477484	-0.419285	-1.03893
	0.102652	0.507165	0.524761	0.273546	0.316085	0.0113087	0.477484	-0.419285	-1.03893	-0.556534	-0.0502088	-0.173602	-1.31186	-1.17861	-0.0337979	0.126702	0.164741	0.235354	0.344055	0.435601	0.253428	0.182649	0.384557	0.262678	0.351902	0.213432	0.143781	0.226952	0.1326	0.467345	0.296759	0.205797	0.148285	0.615168	0.0653531	0.177285	0.159733	0.485943	1.5039	0.919115	1.21904	0.444755	0.36445	0.10836	-0.134543	-0.102114	-0.246297	-0.349632	-0.271688
	-1.0391	-1.60308	-2.48627	-2.06936	-1.36243	-2.76381	-2.65487	-2.69208	-0.912344	-1.08533	-1.37264	-1.06733	-1.46279	-0.455071	-2.78606	-2.10051	-1.35578	-1.3345	-2.57063	-1.12271	-0.317426	-1.2696	-0.305258	-0.342286	-0.53139	-0.420607	-0.145091	-0.567658	-1.48793	-1.02877	-0.22747	-1.54646	1.33801	0.250199	0.0491214	0.963356	0.313048	0.834697	1.14684	2.22239	0.879032	0.899404	0.646007	1.15227	1.80819	1.21684	0.854704	0.17433	0.257891
	-2.69208	-0.912344	-1.08533	-1.37264	-1.06733	-1.46279	-0.455071	-2.78606	-2.10051	-1.35578	-1.3345	-2.57063	-1.12271	-0.317426	-1.2696	-0.305258	-0.342286	-0.53139	-0.420607	-0.145091	-0.567658	-1.48793	-1.02877	-0.22747	-1.54646	1.33801	0.250199	0.0491214	0.963356	0.313048	0.834697	1.14684	2.22239	0.879032	0.899404	0.646007	1.15227	1.80819	1.21684	0.854704	0.17433	0.257891	1.6836	1.62917	1.05699	2.19601	0.471352	0.666598	0.563394
	0.17053	0.483061	0.421918	1.53357	0.828573	1.14129	1.09006	0.539523	0.196218	-0.653923	-0.17132	-1.51732	-1.01375	-0.609152	-1.81088	-3.91972	-3.31599	-2.30351	-3.76379	-2.44288	-0.514622	-1.23502	-2.41821	-0.871154	-0.358467	-0.580116	-0.217715	-0.545942	-0.149786	-1.36988	0.809352	0.803328	0.186723	0.695003	1.39813	1.8982	2.38845	1.77452	1.02065	0.867429	2.70122	-1.73748	-1.70395	-0.892826	-0.903725	-1.46876	-1.88774	-0.416693	-0.476655
	NaN	NaN	NaN	NaN	NaN	NaN	NaN	NaN	NaN	1.80721	1.67645	1.68327	1.15856	0.751824	0.919226	2.25185	1.77579	3.49746	2.25246	1.83791	1.76183	2.38122	1.33652	1.58859	0.14752	0.614541	0.213361	0.231512	0.442766	0.709703	0.552778	0.178403	1.9142	0.430982	1.36898	0.136236	0.847782	1.4596	0.82116	0.324883	0.876917	0.258413	0.839873	1.64201	1.46749	1.76207	2.45648	1.38976	1.61768
	NaN	NaN	NaN	1.80721	1.67645	1.68327	1.15856	0.751824	0.919226	2.25185	1.77579	3.49746	2.25246	1.83791	1.76183	2.38122	1.33652	1.58859	0.14752	0.614541	0.213361	0.231512	0.442766	0.709703	0.552778	0.178403	1.9142	0.430982	1.36898	0.136236	0.847782	1.4596	0.82116	0.324883	0.876917	0.258413	0.839873	1.64201	1.46749	1.76207	2.45648	1.38976	1.61768	-0.139585	-1.10681	-0.796515	-0.325026	-0.187816	-0.209606
	0.324883	0.876917	0.258413	0.839873	1.64201	1.46749	1.76207	2.45648	1.38976	1.61768	-0.139585	-1.10681	-0.796515	-0.325026	-0.187816	-0.209606	-0.94006	-0.752838	-1.80476	-1.11963	-1.29954	-2.07809	-1.51042	-0.66643	-1.55652	-0.544374	-0.361869	-1.64503	-1.97794	2.06961	1.62013	2.15678	1.52207	1.63516	1.83465	0.931784	1.69547	2.10199	1.28785	1.97205	1.37963	-0.284055	-0.286642	-2.44231	-2.07461	-3.1883	-2.59494	-3.00893	-2.45235
	3.16191	1.09306	2.22407	0.750136	2.30345	1.2113	2.418	2.53113	2.04739	1.9068	1.28676	2.01141	2.23022	2.86936	1.02786	2.58233	1.3844	2.54979	1.65935	2.28437	2.39841	1.88333	2.65279	2.83507	2.43553	1.32899	4.09449	2.16125	2.0648	1.49934	2.83591	1.95504	1.28112	0.971276	1.73881	2.19624	3.05806	0.40699	0.968883	1.83801	1.47589	-2.82481	-1.84583	-0.519771	-0.268685	-1.28644	-0.363596	-0.352574	-0.165048
	1.28112	0.971276	1.73881	2.19624	3.05806	0.40699	0.968883	1.83801	1.47589	-2.82481	-1.84583	-0.519771	-0.268685	-1.28644	-0.363596	-0.352574	-0.165048	-0.770743	-1.92372	-0.956202	-1.21351	-0.370234	-1.26237	-1.84734	-0.982027	-0.892854	2.11535	2.40415	2.83673	1.38965	1.12155	0.156791	1.01877	0.813403	0.613382	0.637148	0.934492	1.51018	1.16187	1.7733	1.54098	-1.4015	-2.0719	-3.01058	-2.00616	-1.17848	-0.932554	-0.6347	-1.49532
	3.07099	2.75284	2.00835	1.57561	3.00264	2.23498	1.69137	2.1306	1.70259	2.07791	0.632431	0.45541	0.434397	0.773719	1.10731	2.14315	-2.75103	-3.28	-2.32812	-2.63495	-2.68084	-2.50883	-1.58553	-1.37049	-1.73084	-1.54782	-0.63688	-0.876706	-0.8628	-1.76874	-1.28395	-2.58241	1.44818	3.88449	1.02243	1.28607	2.16992	3.02962	2.13609	0.984031	1.20708	0.369325	1.31739	1.0414	1.50472	1.23154	0.586675	2.13164	2.06673
	-1.7495	-1.79764	-0.793789	-0.985402	-0.492257	-0.50066	-2.14787	-1.27041	2.47156	2.77523	2.14566	1.60269	3.33273	2.49303	2.70861	2.71141	1.8041	3.1054	1.661	2.97819	3.17565	2.33326	0.926008	-3.91222	-2.87998	-2.68021	-0.860027	-0.0443122	-3.60405	-1.65248	-0.478631	-2.86437	4.2022	2.0285	2.36641	1.82425	2.2745	1.29797	1.90845	0.970347	0.411689	0.571278	0.455841	0.48142	1.84864	2.58013	3.73399	1.57636	2.40523
	2.71141	1.8041	3.1054	1.661	2.97819	3.17565	2.33326	0.926008	-3.91222	-2.87998	-2.68021	-0.860027	-0.0443122	-3.60405	-1.65248	-0.478631	-2.86437	4.2022	2.0285	2.36641	1.82425	2.2745	1.29797	1.90845	0.970347	0.411689	0.571278	0.455841	0.48142	1.84864	2.58013	3.73399	1.57636	2.40523	2.98229	2.07381	1.86903	1.09361	2.1884	0.898622	1.84629	-1.57324	-1.79099	-1.84438	-1.60939	-1.28505	-1.05681	-0.831289	-2.43891
	0.859562	2.0541	3.35754	4.34234	2.03201	2.26914	1.97214	3.08309	2.86049	1.7018	2.90462	-1.60194	-1.03624	-2.55224	-2.79945	-1.02461	-2.12031	-1.05473	-0.45247	-0.25897	-0.764522	-3.39769	-3.7155	-2.1038	-1.82627	-2.63955	-2.16798	-2.25251	-1.4074	-1.27967	-0.466637	-0.981121	-0.493019	-0.497737	-2.15043	-1.98451	3.71282	3.399	2.93048	2.03749	2.92831	3.92664	2.85951	1.55449	2.63245	3.23471	2.12844	2.36238	1.93774
	3.87246	2.1196	4.29593	-2.05399	-1.45905	-4.89129	-3.05782	-1.38065	-3.15971	-3.10869	-4.14691	-1.49714	-1.74093	2.87688	2.74224	2.02047	0.694121	0.813162	0.959273	0.353977	0.375919	1.99885	2.65133	2.55478	4.5282	3.21794	1.9018	2.50472	2.86528	1.744	1.67419	2.51746	2.48231	3.08098	1.83624	3.37905	4.10171	1.2455	1.36122	1.7377	2.73408	3.04738	3.44728	1.66894	1.38084	2.78507	3.01251	2.22058	2.55719
	-0.719079	-2.68738	-1.14168	-0.47987	-0.433651	-0.851582	-0.56095	-0.87888	-0.770429	-1.6865	3.15252	1.3329	1.16516	2.01915	2.31576	2.41361	3.88392	0.860142	1.35325	2.24906	2.24689	3.28094	1.42617	0.708949	1.33091	1.03709	0.239927	1.90025	1.30178	0.578102	1.36109	2.33174	0.959593	0.670146	1.60705	2.17241	2.13556	0.970303	1.81179	2.72403	0.869323	2.00902	1.32744	2.33716	3.19731	1.69868	1.3171	0.841774	2.52984
	3.19731	1.69868	1.3171	0.841774	2.52984	2.12234	1.80887	1.359	1.78932	2.233	2.44722	0.708087	1.15354	0.201921	0.206279	1.15958	1.19092	0.613719	1.58785	1.21054	1.74633	2.08642	1.70259	1.6603	1.43065	1.08046	2.60898	1.61053	-0.396243	-0.725335	-2.43457	-0.266269	-0.716842	-0.642535	-1.01554	-2.13689	2.54867	2.62268	1.32509	1.66624	2.04295	1.5194	2.55291	2.70035	2.86042	1.85338	2.40306	2.26144	2.33395
	-2.51756	-3.42146	-1.63884	4.15576	3.54417	3.16071	1.8372	1.61029	0.438525	2.79868	1.08527	2.67936	3.28347	0.915981	2.03054	2.75134	2.4476	1.30201	3.08966	1.52986	3.59896	1.70318	0.715118	3.18967	1.42121	-2.78857	-2.45578	-2.10395	-1.22813	-1.93527	-0.383847	-0.355146	-0.410071	-1.02181	-1.94496	-2.90318	-1.48478	2.24251	3.70594	3.91096	1.98141	3.0395	2.15938	2.23001	1.49004	2.7903	2.69225	1.86899	2.42866
	2.29208	2.97948	3.17094	3.40901	3.22652	1.91716	1.49623	3.49996	4.05546	1.66559	1.58775	3.70137	3.69721	2.74867	0.939223	3.95354	2.46104	2.0843	1.91069	0.704701	3.11513	3.45467	1.67264	1.14734	1.30139	1.23044	1.69517	3.69405	2.25879	2.12985	3.28298	1.37746	0.998458	0.832089	1.57783	0.895247	0.615308	0.40031	0.930698	2.67098	2.16408	-0.967583	-0.897825	-2.07646	-3.18125	-1.90811	-1.7852	-2.32986	-2.78453
	5.18356	2.5694	1.87712	0.900933	1.3195	-1.2949	-3.70494	-2.85552	-2.67203	-0.189126	-3.7069	-1.0715	-1.8401	-0.987441	-1.17355	-2.40673	-2.53492	-0.786252	-2.70402	-0.919539	-0.762305	-3.1988	-2.88585	-1.61368	1.94149	1.9253	3.43794	2.08094	1.53039	1.78496	2.65314	3.01454	1.88695	4.43508	1.99454	1.43878	2.5381	2.6736	3.11898	1.10385	0.885817	1.69634	1.02211	3.80577	2.89169	3.62139	2.58547	1.30949	3.8797
	3.32409	2.32559	2.09854	2.85693	3.36638	3.92619	2.67777	2.92273	2.81079	2.74278	2.92865	3.22891	1.52203	2.63129	4.05447	3.46359	2.04335	0.867363	1.44415	3.20123	4.29739	2.741	1.36244	2.75284	4.93639	2.48417	2.55019	4.00985	3.26953	2.1044	2.11941	3.20446	3.91094	2.18253	1.78073	2.77382	3.81698	0.998401	3.89433	2.96188	2.47958	-2.89535	-3.1322	-3.2063	-1.6662	-1.90738	-3.16625	-3.09832	-2.13846
	-2.44902	-1.13602	-0.610564	-0.639476	-0.634544	-1.9129	-2.48086	-1.93535	-2.72617	-3.82294	-2.28892	2.06827	3.90326	3.23169	1.7963	3.53768	4.16282	2.58074	1.81303	3.08272	2.76612	4.39516	2.73188	2.3846	3.83523	2.41343	2.79187	1.76672	4.28685	3.5149	2.64664	2.38458	1.52409	2.79434	2.52753	4.4958	2.36906	1.2775	3.76983	3.58143	2.38843	1.17835	2.38066	1.96579	2.20718	1.37575	3.04943	2.25761	2.01905
	3.04943	2.25761	2.01905	2.15123	2.38749	4.33234	1.15377	1.30449	2.65672	3.63561	1.17157	1.02824	-2.41221	-1.94122	-3.35624	-1.75854	-0.276544	-0.425425	-0.456028	-0.589203	-1.2481	-1.27592	-1.62484	1.84113	3.09592	5.45537	1.51278	1.82163	2.46738	2.69559	1.27299	3.70517	1.28482	1.47102	2.57936	2.11125	1.4018	2.73767	2.04178	2.41579	4.10355	1.78516	2.25088	1.89954	2.54252	2.81401	3.21262	2.19143	2.9834
	4.10355	1.78516	2.25088	1.89954	2.54252	2.81401	3.21262	2.19143	2.9834	1.41815	4.3878	1.62211	1.79189	2.47733	3.1681	2.25251	2.97747	1.23316	2.35573	3.56431	1.795	1.67851	3.35352	3.43047	2.04957	3.29875	1.40317	2.99807	3.83854	1.75091	2.96327	2.30107	3.79292	2.30565	1.42866	3.78028	2.10006	1.76843	1.63296	1.92744	2.40497	2.56718	2.38589	1.04037	3.37191	2.01757	2.04208	2.33046	-3.24948
	NaN	NaN	NaN	NaN	NaN	0.892373	0.719681	2.07199	1.91579	1.51634	1.91792	0.407806	2.04511	1.91978	2.29487	1.83068	1.58566	1.16745	0.676749	0.800767	0.301714	1.09559	0.0980042	1.08664	0.379229	0.544409	0.830755	0.75953	1.24468	1.78649	3.37712	2.3394	1.73316	1.59032	2.05017	2.84453	0.558749	0.818295	1.41289	0.451112	0.132416	0.437329	1.0596	1.17727	3.32123	2.98273	0.964561	2.19564	0.64988
	1.58566	1.16745	0.676749	0.800767	0.301714	1.09559	0.0980042	1.08664	0.379229	0.544409	0.830755	0.75953	1.24468	1.78649	3.37712	2.3394	1.73316	1.59032	2.05017	2.84453	0.558749	0.818295	1.41289	0.451112	0.132416	0.437329	1.0596	1.17727	3.32123	2.98273	0.964561	2.19564	0.64988	1.85243	2.39969	1.32454	1.44844	1.64276	1.41056	1.61487	1.32335	2.81649	2.51917	0.890894	0.346618	3.13179	-3.42886	-0.507171	-1.04204
	-1.32221	-0.304663	-0.117893	-0.583034	-0.952338	-1.49045	-0.0608692	-0.702774	-1.32973	-1.87021	-2.3371	-1.81404	-1.59667	-2.37987	-1.81903	-1.28854	-0.150334	-2.33388	-0.929407	-2.13762	-1.25485	-0.540524	-0.666717	-0.516607	-0.474827	-0.874407	-0.999702	-0.62823	1.7857	1.71995	2.69122	0.528581	1.20363	0.892332	1.78227	2.10206	0.650184	0.531599	2.61653	1.21439	2.23991	-1.57795	-2.72633	-1.27272	-1.30549	-2.102	-1.8809	-0.0467429	-0.833232
	-2.01289	-2.78505	-1.29238	-1.10612	-0.444229	-0.314499	-1.6721	-2.58496	-1.81241	1.94724	1.65207	2.65662	2.49746	1.4035	1.19434	0.893714	2.4991	2.52417	1.48581	0.684382	1.25324	1.92333	2.28529	2.62801	2.00225	1.7618	1.81785	2.03714	1.58267	1.71902	2.91259	1.31686	1.43221	2.31277	2.13277	2.0237	1.08255	0.723268	1.47272	1.54862	1.73294	-0.863004	-2.63032	-2.35938	-0.48416	-1.96052	-2.76897	-3.71176	-1.83689
	1.31686	1.43221	2.31277	2.13277	2.0237	1.08255	0.723268	1.47272	1.54862	1.73294	-0.863004	-2.63032	-2.35938	-0.48416	-1.96052	-2.76897	-3.71176	-1.83689	-2.58819	-1.68096	-2.16229	-2.38264	-1.12261	-1.5581	-1.27883	-2.03115	-1.63734	-0.380321	-0.767781	-0.855828	-0.588162	-0.632543	-0.79365	-1.51642	1.71968	3.73803	2.2073	1.22806	2.52272	2.72979	1.60339	3.94788	2.09628	0.943107	3.02056	2.96521	2.02106	0.687892	2.24424
	-1.68096	-2.16229	-2.38264	-1.12261	-1.5581	-1.27883	-2.03115	-1.63734	-0.380321	-0.767781	-0.855828	-0.588162	-0.632543	-0.79365	-1.51642	1.71968	3.73803	2.2073	1.22806	2.52272	2.72979	1.60339	3.94788	2.09628	0.943107	3.02056	2.96521	2.02106	0.687892	2.24424	1.91605	1.08778	1.75983	1.14243	1.04778	1.38712	1.09889	0.361737	0.956566	1.74124	0.325994	-0.425513	-0.933081	-1.28818	-1.47515	-1.56657	-1.72037	-1.87846	-1.88493
	1.08778	1.75983	1.14243	1.04778	1.38712	1.09889	0.361737	0.956566	1.74124	0.325994	-0.425513	-0.933081	-1.28818	-1.47515	-1.56657	-1.72037	-1.87846	-1.88493	-0.784523	-1.19489	-0.675061	-1.12016	1.93765	2.11368	2.03917	2.48889	1.86974	0.737115	1.00435	3.73833	2.25525	3.2813	1.49522	1.97437	2.16086	3.72612	1.98476	1.25449	1.99671	5.10913	1.02562	-1.73184	-0.137738	-0.676328	-0.765058	-0.0766423	-1.24001	-1.41892	-0.826375
	3.2813	1.49522	1.97437	2.16086	3.72612	1.98476	1.25449	1.99671	5.10913	1.02562	-1.73184	-0.137738	-0.676328	-0.765058	-0.0766423	-1.24001	-1.41892	-0.826375	-0.383897	-0.459906	-0.619776	-0.750586	-0.669842	-1.18028	-2.12593	-1.14448	-1.71137	1.70297	0.577271	1.84268	1.4282	1.0209	1.32911	0.675175	1.3258	1.71108	3.12869	3.06329	1.02386	1.59902	1.46144	0.558617	1.02186	0.450319	0.471641	0.781232	0.199258	-0.445241	-0.455555
	-1.19891	-2.50508	-1.64977	-1.78426	-0.972188	-2.36583	-2.29361	-1.77246	-1.29772	-0.96066	-0.756571	-1.62977	-1.87265	-0.939403	-0.513597	-0.544613	-0.826514	-2.41113	-2.77554	-2.34533	-2.3796	-1.62924	-0.172626	-1.08829	-0.124347	-0.688936	-0.131427	-1.13854	0.736391	2.4774	2.73424	1.005	2.0101	1.69826	2.22743	1.34465	0.798806	2.65966	2.03844	1.07374	1.6714	2.06307	2.76673	1.48625	2.91876	3.83443	1.43412	1.71658	3.23657
	-1.13854	0.736391	2.4774	2.73424	1.005	2.0101	1.69826	2.22743	1.34465	0.798806	2.65966	2.03844	1.07374	1.6714	2.06307	2.76673	1.48625	2.91876	3.83443	1.43412	1.71658	3.23657	3.16148	2.47815	2.56218	2.58343	2.95192	3.0205	1.9507	1.57573	3.63552	3.18796	1.97162	1.15607	1.29994	2.23405	0.349781	2.51901	2.07461	0.955816	1.18951	-0.742986	-0.0440248	-1.40594	-1.69212	-1.05725	-1.19229	-0.118409	-0.913504
	-0.547196	-0.191308	-0.168429	-1.206	-1.36701	-1.70411	-2.35743	-1.59799	-1.42467	-3.20782	-2.74366	-1.78071	-2.47859	-0.97653	-1.56743	-0.445817	-0.456688	0.779319	1.17929	1.35242	1.88472	1.30006	0.77531	0.562522	0.650185	1.68355	2.62946	1.30869	1.96656	1.4532	2.48786	1.38199	2.43521	0.646509	2.63244	2.86106	2.09016	1.36871	2.42632	3.0391	2.0844	-2.13816	-1.34495	-1.40139	-0.360038	-1.63515	-3.96227	-1.27313	-1.98933
	2.0844	-2.13816	-1.34495	-1.40139	-0.360038	-1.63515	-3.96227	-1.27313	-1.98933	-1.66734	-1.72755	-1.64983	-1.55493	-0.782395	-1.0529	-0.92459	-0.36918	-0.784397	-1.12408	-1.70253	-1.91912	-1.35271	-2.12053	-2.98702	-1.68243	-2.43311	1.21489	3.96337	1.9292	1.67097	1.74512	1.9917	1.7624	3.4053	1.09189	1.79628	0.475016	2.0071	3.57974	2.22477	2.00506	-2.91353	-2.23472	-3.19625	-1.34597	-0.466058	-1.40793	-0.288903	-0.394223
	4.14019	1.57495	1.46734	4.33494	2.47546	1.70949	0.754026	5.25925	3.45845	1.10827	1.56184	2.46824	3.30034	1.86657	0.944179	2.76068	4.5656	1.52921	0.911256	3.36086	3.6107	2.91841	2.06287	3.09163	2.92016	4.28659	2.20073	1.98023	2.53234	2.99859	2.72451	1.0236	3.69946	3.59046	1.47172	2.16738	2.86904	4.25278	1.88105	1.62508	2.74678	3.07791	1.01708	0.955422	4.10975	2.67835	1.82436	3.42156	4.36309
	-1.0738	-0.880884	-0.302753	-0.51291	-1.76401	-1.29108	-0.859375	-1.71631	-0.259541	-0.71229	-1.68263	-3.25007	-2.18301	-1.71566	-2.44612	-2.66662	-1.89514	-0.529315	-1.24174	-0.632924	-0.0669924	-0.756727	-1.40265	-1.27596	-2.48867	-1.32125	2.46759	2.46598	0.331065	1.54974	1.52791	1.74011	2.10157	2.27918	0.946295	1.88052	1.76561	1.86316	2.52347	2.49271	1.85745	1.0423	1.63722	3.07826	1.79911	1.8297	1.10922	2.74449	3.0817
	-0.824936	-0.82782	-0.393103	-0.010771	-1.47979	-1.62148	-1.54804	-1.61858	-2.77918	1.8882	3.14466	1.02001	2.24223	3.30245	0.758804	1.64969	1.94744	3.91046	2.66036	1.17651	2.33906	3.47028	3.08789	1.25765	-2.88967	-2.44795	-1.36686	-2.1281	-1.12751	-3.05444	-2.27099	-0.241978	-3.32993	3.36135	1.86592	2.67052	1.83887	2.46137	1.37196	2.29322	1.07567	0.681202	0.787356	0.765939	0.448014	0.526764	0.74089	1.0353	0.546285
	1.22193	1.14697	1.13442	1.46154	1.8557	1.08013	0.768452	-3.56194	-1.66921	-1.7065	-0.937526	-3.31326	-1.24091	-2.64001	-1.88631	-1.07108	-2.0367	-1.26381	-0.753178	-0.155555	-0.463276	-0.0488405	-0.258902	-0.494711	-1.58613	1.72378	2.44952	1.48612	2.73882	1.03483	1.90835	1.76216	2.36789	2.30423	1.97551	2.76575	1.78593	2.4563	1.99286	1.20846	1.59281	0.0221997	0.212907	0.605021	0.745671	0.753224	1.05134	2.17631	2.31316
	-3.56194	-1.66921	-1.7065	-0.937526	-3.31326	-1.24091	-2.64001	-1.88631	-1.07108	-2.0367	-1.26381	-0.753178	-0.155555	-0.463276	-0.0488405	-0.258902	-0.494711	-1.58613	1.72378	2.44952	1.48612	2.73882	1.03483	1.90835	1.76216	2.36789	2.30423	1.97551	2.76575	1.78593	2.4563	1.99286	1.20846	1.59281	0.0221997	0.212907	0.605021	0.745671	0.753224	1.05134	2.17631	2.31316	2.34713	1.43087	2.179	2.6232	2.78422	2.2592	2.28949
	-1.0514	-0.956886	-0.729806	-0.715527	-0.505724	-0.347894	-0.5094	-1.94052	-3.53134	-1.45135	-1.71221	-2.20394	-1.91472	-1.67623	-2.03583	-3.06245	-4.1198	-1.51073	-0.770995	-1.41775	-2.34171	-2.02255	-0.639189	-3.01845	-1.63915	-2.14905	-1.27463	-0.400311	-0.737472	-0.878034	-0.518511	-0.413156	-0.939052	-0.689915	-2.00981	2.35295	1.49124	0.436849	2.12198	1.56398	2.71513	1.69382	1.25537	2.48358	1.73127	2.6146	3.60445	1.5534	1.42519
	-0.223797	-1.45683	1.68837	1.77855	1.65384	0.943291	2.28366	2.14857	3.07172	1.4497	2.63942	3.12082	2.51848	1.20601	3.14357	2.73162	1.58713	0.831024	1.28132	3.13049	2.21957	2.11024	2.64774	1.94228	1.85365	2.09191	4.27305	3.0054	0.163583	3.16685	4.90649	1.43536	0.664186	2.77845	2.29731	1.80731	2.83993	2.02473	2.53464	2.33679	2.83931	1.96297	2.74665	2.45407	2.80431	1.44393	1.47213	2.96051	1.87999
	2.35811	2.64284	0.218231	1.84593	3.71021	3.50569	1.49201	1.73233	3.29634	3.20417	1.18752	0.149506	-0.64784	-3.51469	-2.66663	-1.98538	-1.20749	-1.14165	-0.337494	-1.40523	-2.58796	-4.03004	-3.04574	-1.70583	-0.842437	-0.203682	-0.0384907	-0.258655	-1.00826	-1.56135	-3.29273	-1.22755	-1.54705	3.6237	3.2219	2.21129	1.18422	2.74268	3.32967	2.11039	1.88964	2.78079	2.71443	2.96477	1.46984	3.05249	1.69046	2.58343	2.12998
	-2.19317	-2.90937	-2.73383	-1.60107	-1.54692	-0.147892	-0.982882	-0.774564	-0.474354	-0.31774	-1.23193	-2.27276	-1.10723	-1.86682	-0.96173	-2.05261	-1.31449	-1.31583	-2.73649	-0.939818	-0.991795	-0.74501	-1.42943	-2.6717	-1.0188	-0.844725	-2.09637	-2.34438	-2.16716	1.35201	3.25238	2.35684	2.06286	1.41039	1.23205	1.71319	1.87061	2.20097	1.84848	1.66817	3.27618	-3.03545	-0.636698	-1.52033	-1.27349	-0.10781	-0.571224	-1.7156	-1.6047
	-3.03545	-0.636698	-1.52033	-1.27349	-0.10781	-0.571224	-1.7156	-1.6047	-1.36834	-0.24019	1.59666	1.69238	1.83833	2.09273	2.07048	1.19465	3.07928	1.996	2.15973	-2.20925	-1.48881	-3.89973	-2.5403	-1.20105	-1.76735	-3.54894	-3.38809	-1.52352	-1.56583	-0.0664705	-0.545135	-1.75673	1.61242	4.66464	2.04842	2.10786	1.65321	2.05263	2.29402	1.73652	1.51301	0.126079	0.630169	0.999344	0.820187	0.342543	1.75461	2.80997	2.01768
	0.630169	0.999344	0.820187	0.342543	1.75461	2.80997	2.01768	1.90729	4.10171	2.25281	0.929396	2.89747	1.92647	1.38821	2.05456	5.39561	2.44839	1.25816	2.84995	1.90335	3.84226	1.31318	2.87847	2.3543	1.73644	1.71843	4.1702	2.34463	1.80072	2.6358	1.70637	2.04876	1.43626	1.06625	1.55249	2.90568	1.57797	0.974595	1.22337	1.96428	1.85422	1.37037	2.80001	4.17127	1.30937	2.92386	2.22907	1.76883	3.65847
	1.30937	2.92386	2.22907	1.76883	3.65847	2.08223	2.72848	1.03551	2.50957	3.17998	2.37701	2.07723	2.0046	1.84844	2.8091	3.66988	1.59308	-2.19242	-2.30953	-1.61121	-0.722255	-1.85179	0.186913	0.97321	1.22812	1.41104	1.72575	1.45856	1.24822	1.46565	0.667194	1.50733	2.16717	3.10208	2.64884	1.91535	2.17961	3.06247	2.46494	2.82736	2.52102	2.22492	2.58817	1.83352	3.04028	2.85833	2.61822	1.73243	3.40511
	2.50041	2.53592	1.2997	2.41801	2.07002	3.23881	2.85425	2.03555	2.64024	2.82586	2.32223	1.70356	-2.78705	-2.66055	-0.686815	-1.79007	-1.3726	-2.01734	-2.38845	-1.1136	-2.57177	-1.33324	-3.1791	-2.62332	-1.62677	-0.062455	-1.30464	-0.965992	-0.212972	-0.577913	-0.0732838	0.905771	1.37408	2.406	2.23544	1.80797	3.0169	2.0645	2.55912	1.59897	3.67954	2.67212	2.87769	1.68644	1.51282	1.02889	1.47416	1.79185	0.939151
	NaN	NaN	NaN	NaN	NaN	NaN	NaN	NaN	NaN	NaN	NaN	NaN	NaN	NaN	NaN	NaN	NaN	NaN	NaN	0.306114	2.11384	2.01249	2.38656	1.81994	2.98265	3.42493	2.451	1.29428	3.73651	3.53959	0.773756	2.80485	2.08181	1.05811	1.15065	0.965367	2.50825	1.78416	1.07624	1.01583	0.273609	2.87571	2.86256	1.35729	1.91129	2.92464	1.05391	2.9935	4.76798
	1.61061	2.47725	4.83719	1.7648	1.05785	2.16329	2.95079	2.72832	1.51158	2.57359	3.12534	1.97979	1.64131	3.73973	3.45134	1.30825	1.31032	3.01437	2.67434	1.85656	2.31533	2.66281	1.86008	3.39819	1.67031	2.33426	2.34828	1.8212	1.80251	1.54199	1.38432	1.64249	2.06953	1.08878	1.19691	2.29875	3.16258	2.66909	2.26916	1.24163	2.47286	2.81989	2.25492	2.01874	1.92489	0.306863	3.0778	3.03775	1.42913
	1.64131	3.73973	3.45134	1.30825	1.31032	3.01437	2.67434	1.85656	2.31533	2.66281	1.86008	3.39819	1.67031	2.33426	2.34828	1.8212	1.80251	1.54199	1.38432	1.64249	2.06953	1.08878	1.19691	2.29875	3.16258	2.66909	2.26916	1.24163	2.47286	2.81989	2.25492	2.01874	1.92489	0.306863	3.0778	3.03775	1.42913	2.1731	1.37331	2.89165	2.49036	2.51027	2.43112	1.87604	1.4339	2.78796	4.23604	2.62149	1.75218
	1.24163	2.47286	2.81989	2.25492	2.01874	1.92489	0.306863	3.0778	3.03775	1.42913	2.1731	1.37331	2.89165	2.49036	2.51027	2.43112	1.87604	1.4339	2.78796	4.23604	2.62149	1.75218	2.63948	2.35543	2.89188	2.15477	1.32475	1.89644	1.6323	2.26643	2.526	2.33661	2.44562	2.26001	2.80289	2.45823	1.92622	3.60576	1.06775	1.88001	2.4844	2.39072	3.4233	1.28606	3.27811	2.03135	2.61517	2.97775	1.79026
	2.45823	1.92622	3.60576	1.06775	1.88001	2.4844	2.39072	3.4233	1.28606	3.27811	2.03135	2.61517	2.97775	1.79026	2.3733	1.21098	3.93693	2.33803	2.17147	2.00733	0.903973	3.06127	2.74826	2.29906	2.02263	3.1841	2.77574	3.58685	1.97421	1.47404	3.50391	1.72455	2.56666	1.38748	1.37839	1.64716	2.60906	3.14217	2.09345	2.88816	3.83902	-2.30471	-1.55725	-2.14861	-2.03359	-3.72861	-1.58696	-1.38123	-1.71659
	0.178026	1.12072	1.81972	1.76232	0.548115	1.75191	1.62431	1.734	1.95285	2.28071	2.96066	2.76945	3.52971	3.21926	-2.24593	-2.70268	-1.08815	-1.54873	-1.21648	-2.07865	-2.17281	-2.47274	-0.76736	-3.52485	-1.77518	-3.38738	-2.53878	-3.12415	-0.858471	-0.688857	-0.586869	-0.16832	-0.617237	-1.72602	3.1086	1.78836	4.83345	2.89179	3.85889	1.94334	3.15934	4.27086	2.93262	3.22997	3.19879	3.78435	2.06691	-2.81833	-2.91947
	1.62431	1.734	1.95285	2.28071	2.96066	2.76945	3.52971	3.21926	-2.24593	-2.70268	-1.08815	-1.54873	-1.21648	-2.07865	-2.17281	-2.47274	-0.76736	-3.52485	-1.77518	-3.38738	-2.53878	-3.12415	-0.858471	-0.688857	-0.586869	-0.16832	-0.617237	-1.72602	3.1086	1.78836	4.83345	2.89179	3.85889	1.94334	3.15934	4.27086	2.93262	3.22997	3.19879	3.78435	2.06691	-2.81833	-2.91947	-1.0628	-0.8876	-3.90729	-3.7478	-3.83244	-3.72887
	1.7699	3.34901	4.53289	2.82442	2.45069	3.88609	3.42154	2.08211	2.10693	5.41657	3.67891	2.50214	2.88451	-4.68338	-0.835224	-2.16652	-2.50629	-0.623739	-1.48698	-2.2024	-1.46366	-0.496172	-3.6102	-4.39571	-2.55794	-0.587585	-0.55306	-0.616943	-0.664508	-2.10456	-1.6338	-1.97782	2.1815	2.7257	4.10478	2.03362	3.42875	2.58848	1.58499	4.55849	3.69917	2.77033	3.57644	2.94931	3.76857	3.9446	2.87913	2.27158	1.65514
	2.58848	1.58499	4.55849	3.69917	2.77033	3.57644	2.94931	3.76857	3.9446	2.87913	2.27158	1.65514	5.96616	3.40468	1.52406	1.3331	1.81391	2.58734	1.55736	3.43096	4.06268	1.56509	2.29959	2.27019	2.65878	2.73096	2.86289	2.02323	2.33985	2.91403	4.16569	1.91372	1.96153	2.6156	2.18955	3.64657	4.25923	1.75687	3.09141	2.37502	4.12529	1.84946	2.51396	2.89969	1.645	3.01471	4.02358	2.82583	1.66482
	4.34509	2.01412	1.65839	3.25048	2.9082	3.04911	5.79805	2.2123	4.26688	3.38286	2.9317	2.21686	3.80258	3.40876	2.17688	2.98376	2.21154	2.87558	2.66411	1.07809	2.72351	-2.22989	-3.11309	-1.6525	-2.83599	-2.46046	-2.44652	-0.112425	-2.98254	2.93695	0.532856	0.545302	2.06552	3.64131	5.42802	2.99022	5.46749	3.68545	2.14065	3.26436	2.08681	-1.81989	-0.122332	-1.33952	-4.69156	-2.81196	-2.01047	-4.50967	-2.8873
	2.76063	3.58041	2.93302	2.44809	5.768	3.1735	2.1366	3.86429	4.38543	3.50033	2.91646	4.16304	3.38054	2.13691	4.15821	3.59974	2.29422	3.15121	4.63563	2.52563	2.57997	3.20756	3.37174	3.0988	2.99482	3.24847	3.21073	1.9202	2.88516	2.47644	2.2328	2.14392	3.8184	3.31814	3.77766	2.6367	2.44468	1.16508	0.356191	1.44729	2.143	3.34712	3.57134	2.57257	3.7854	2.4629	2.30494	4.59442	1.81991
	-4.2254	-4.62898	-3.08146	-2.89082	-2.16426	-2.95626	-1.0544	-0.682043	-0.847175	-0.728324	-0.870285	-3.00999	2.92406	2.3408	2.91209	2.79376	3.17811	4.72439	2.58832	3.45691	3.51618	4.50046	3.62633	2.26314	2.07361	4.06004	4.65296	1.851	3.15572	3.35229	3.3155	2.04689	2.32652	2.89269	3.29526	2.83215	2.44687	4.32242	3.0075	2.8967	4.46454	3.76376	2.6357	4.18643	4.10272	2.70922	3.38883	3.03008	3.82052
	3.11831	4.12634	3.49314	1.44713	2.52326	2.73209	-1.41217	-2.10061	-2.04978	-2.61345	-2.75354	-1.67242	-2.32153	-2.96355	-2.27822	-4.20015	-3.21514	-2.36275	-3.39069	-3.7194	-2.60831	-0.15612	-0.863292	-1.2639	-0.251997	-1.77649	-2.37335	-3.19826	2.2754	2.30221	3.61797	3.37512	3.51194	2.79197	4.09159	2.32186	3.20325	2.84552	3.02102	3.54902	3.24493	3.5405	2.72094	1.83273	2.26239	2.94155	2.0207	1.57908	2.25805
	-2.10061	-2.04978	-2.61345	-2.75354	-1.67242	-2.32153	-2.96355	-2.27822	-4.20015	-3.21514	-2.36275	-3.39069	-3.7194	-2.60831	-0.15612	-0.863292	-1.2639	-0.251997	-1.77649	-2.37335	-3.19826	2.2754	2.30221	3.61797	3.37512	3.51194	2.79197	4.09159	2.32186	3.20325	2.84552	3.02102	3.54902	3.24493	3.5405	2.72094	1.83273	2.26239	2.94155	2.0207	1.57908	2.25805	2.75772	3.34336	2.50154	2.39916	3.82059	5.06438	1.59204
	3.27751	4.14484	2.73165	3.65202	3.88853	2.51003	3.03549	4.37086	3.99786	1.82508	2.36134	2.35231	1.28416	3.33448	3.08638	1.67665	3.06251	3.89964	4.49745	1.41336	2.57639	4.16413	3.37922	3.15276	2.71222	2.31498	3.49767	5.32826	2.88517	3.00343	4.73429	3.67964	2.55039	2.8864	1.44425	2.8047	2.02958	2.39144	2.9227	3.42865	3.46965	3.05294	3.75509	4.19035	2.12281	2.62845	4.39448	3.71739	2.11287
	1.67665	3.06251	3.89964	4.49745	1.41336	2.57639	4.16413	3.37922	3.15276	2.71222	2.31498	3.49767	5.32826	2.88517	3.00343	4.73429	3.67964	2.55039	2.8864	1.44425	2.8047	2.02958	2.39144	2.9227	3.42865	3.46965	3.05294	3.75509	4.19035	2.12281	2.62845	4.39448	3.71739	2.11287	2.69366	5.09461	3.44249	3.14925	2.96459	4.22844	3.08259	3.24512	3.4968	3.28221	2.38484	3.31793	3.42833	2.50703	3.31861
	2.02958	2.39144	2.9227	3.42865	3.46965	3.05294	3.75509	4.19035	2.12281	2.62845	4.39448	3.71739	2.11287	2.69366	5.09461	3.44249	3.14925	2.96459	4.22844	3.08259	3.24512	3.4968	3.28221	2.38484	3.31793	3.42833	2.50703	3.31861	3.73083	5.11798	1.90991	2.10528	1.63891	1.80392	1.38452	2.7457	3.02506	3.11137	1.11059	2.46802	3.68094	3.59566	3.10252	3.26546	2.05174	3.29697	-3.766	-3.03502	-3.23198
	2.14953	1.57892	4.40827	4.01511	2.56584	3.53849	5.14598	2.87134	2.13432	4.86538	3.15416	1.59684	2.29444	3.48853	2.95082	1.1749	1.24576	1.4151	1.24363	2.82945	0.168557	1.99116	2.87176	1.59284	2.32405	2.63158	3.51632	2.77483	5.25731	5.02476	2.67746	2.63079	4.27531	3.53574	4.43187	1.62041	2.70116	5.09527	2.83959	3.44291	3.18166	3.23553	-3.0664	-2.61188	-0.970437	-2.0187	-0.508887	-0.128859	0.203367
	1.12692	1.27837	2.46215	1.15072	3.82686	-2.19681	-2.19111	-2.96254	-2.18267	-0.660575	-2.98795	-2.92944	-3.34578	-0.399945	-2.0802	-1.20893	-1.59359	-3.13286	-3.38756	-2.24086	-2.93496	-1.68971	-1.93762	2.53248	4.37102	3.93374	1.34228	2.24823	3.18271	4.78428	2.2289	3.17288	3.07093	3.92641	3.10348	1.86345	1.49434	3.96709	2.66142	4.48566	3.26164	2.90162	4.13718	4.27676	4.34402	2.93124	3.68192	4.17579	3.96425
	-1.93762	2.53248	4.37102	3.93374	1.34228	2.24823	3.18271	4.78428	2.2289	3.17288	3.07093	3.92641	3.10348	1.86345	1.49434	3.96709	2.66142	4.48566	3.26164	2.90162	4.13718	4.27676	4.34402	2.93124	3.68192	4.17579	3.96425	2.09229	4.36549	2.53316	3.50689	2.38088	3.59725	4.54363	3.1795	2.78063	2.71814	3.97841	2.98209	2.79491	3.46055	2.56118	3.22934	3.20777	3.74445	2.75716	3.0966	2.81635	2.80802
	1.55107	2.73228	5.75643	2.93689	1.77433	4.09063	4.78094	2.27773	2.15616	3.06895	2.7564	2.10416	2.01007	2.34857	2.64447	2.47469	1.48224	1.21616	3.18046	1.69854	3.86719	2.59437	4.15122	2.45173	2.70339	1.30772	1.2506	2.15336	2.12961	2.85036	2.5293	3.92856	2.75822	1.49784	2.2862	2.99899	2.48749	1.82786	1.8216	2.70686	1.71421	-2.61041	-2.79304	-2.76129	-2.57408	-0.75619	-0.568389	-2.12383	-3.76994
	1.21616	3.18046	1.69854	3.86719	2.59437	4.15122	2.45173	2.70339	1.30772	1.2506	2.15336	2.12961	2.85036	2.5293	3.92856	2.75822	1.49784	2.2862	2.99899	2.48749	1.82786	1.8216	2.70686	1.71421	-2.61041	-2.79304	-2.76129	-2.57408	-0.75619	-0.568389	-2.12383	-3.76994	-2.68597	-2.81779	4.94184	4.28798	2.31473	2.38515	3.75867	3.73752	2.75978	4.80421	2.03422	3.76604	3.99083	3.62617	1.81104	3.57026	3.99787
	1.54729	0.928778	2.80255	3.47835	2.10738	2.63956	2.22834	2.02752	1.34895	1.93887	2.25845	3.05456	3.18026	3.51829	2.58496	3.77624	2.65649	2.44463	5.43677	3.16692	3.03398	3.17533	2.64419	4.46715	3.44622	3.22309	-2.66578	-3.61821	-3.85158	-4.55733	-0.586641	4.86869	3.60959	2.36432	4.25254	4.5608	4.21173	3.59773	2.80768	1.60007	1.49514	0.660723	0.278916	0.327995	0.800663	1.44469	1.86192	2.157	4.62656
	2.02752	1.34895	1.93887	2.25845	3.05456	3.18026	3.51829	2.58496	3.77624	2.65649	2.44463	5.43677	3.16692	3.03398	3.17533	2.64419	4.46715	3.44622	3.22309	-2.66578	-3.61821	-3.85158	-4.55733	-0.586641	4.86869	3.60959	2.36432	4.25254	4.5608	4.21173	3.59773	2.80768	1.60007	1.49514	0.660723	0.278916	0.327995	0.800663	1.44469	1.86192	2.157	4.62656	2.63942	3.28279	2.15529	3.65511	3.51357	3.36425	1.74428
	-2.88862	-1.46102	-4.23591	-3.96788	-1.12193	-1.643	-2.36218	-1.61108	-0.185176	-1.80452	-2.7268	-4.33618	-3.41259	-1.89733	-1.37276	-0.7688	-0.592314	-0.940009	-2.70117	-3.44142	-1.38387	2.91631	4.67702	3.60803	1.46442	2.82418	6.01781	3.77781	2.0514	3.53688	1.95839	5.62719	3.48525	2.89926	1.58344	1.14615	1.96741	4.34533	1.65193	1.68725	3.65302	-1.86612	-3.02178	-4.64752	-3.80636	-0.477257	-1.79591	-3.2618	-1.7176
	1.82133	1.66479	4.86492	3.02747	2.96297	3.27496	3.51681	2.75609	3.3266	3.24106	4.73245	2.13728	3.19944	4.43811	3.29951	0.91021	0.517208	1.62905	3.22217	1.89509	2.26383	1.96782	2.71094	2.81861	1.09244	3.89359	4.56215	3.50828	0.777723	3.5358	4.84463	3.18068	4.52399	1.48553	3.51479	2.39489	3.58352	5.45542	2.93173	4.45597	3.10671	2.34277	4.17073	3.84445	2.23862	3.77573	5.10139	1.68124	2.95115
	4.46732	0.675783	3.3882	2.53799	3.31015	4.59451	0.247985	2.6543	4.96762	3.96767	1.83769	3.39874	1.82471	2.25875	1.91735	2.97772	1.80034	1.22299	0.524979	-4.49545	-2.87855	-2.33579	-2.46139	-3.3767	-2.80907	-2.05685	-2.28316	-0.970596	-1.31668	-0.972623	-0.404393	-0.544345	-0.251489	-1.10935	-2.24465	-0.518332	1.98601	1.83092	3.71885	3.28464	1.46723	3.17363	3.24025	2.28466	2.35918	2.04173	3.77793	4.20916	1.58458
	2.33083	2.24347	5.06548	3.52335	2.50054	0.56776	3.24934	3.56474	1.83583	2.2703	3.3587	3.99614	1.99517	0.119465	4.0431	1.27142	2.10076	2.00227	2.26673	2.11878	1.27755	0.935825	2.43444	2.265	0.768734	2.50906	2.71685	1.51243	1.81659	2.33027	3.15253	3.00231	2.9001	2.61296	3.39294	1.49598	2.60358	3.94341	3.00903	1.42702	4.05275	-3.38469	-2.60505	-2.8185	-2.32409	-3.22752	-0.973006	-0.492893	-0.309162
	4.23619	2.7375	5.35551	1.13294	2.89937	0.71957	1.37031	1.27844	1.52685	0.678617	2.28253	2.37818	3.05623	2.59977	3.74866	2.21928	5.01209	1.511	1.78168	4.15901	3.88038	2.00674	2.5673	3.71221	1.6306	2.75587	2.69113	1.50117	1.05925	1.56136	1.86252	1.01296	1.8825	3.96683	2.50788	2.0584	1.46137	1.46386	0.52567	1.02659	1.86403	0.939391	-0.632406	-0.215486	-2.55652	-3.65303	-2.10363	-1.36315	-1.58873
	5.18723	1.90555	1.50629	-2.97094	-2.71558	-2.78586	-1.88799	-1.66431	-1.49451	-1.95841	-0.866809	-4.31895	-6.06695	-2.70807	-0.914969	-3.62799	-3.66265	-2.26205	-0.195561	-0.800025	-0.877636	-0.671171	-0.320006	-1.8009	-3.12358	2.72769	1.64665	1.7125	2.73159	2.82297	4.70164	2.79516	2.7446	2.9659	2.78871	2.41394	1.06575	2.5569	1.29252	1.15688	0.322387	-0.622689	-0.353683	-2.05853	-2.45451	-1.15867	-1.98887	-4.73203	2.23112
	-1.4853	4.15164	2.31487	3.56458	1.51132	1.65626	0.762048	0.330146	1.48659	1.11963	2.02308	2.16223	2.92186	3.16033	3.30355	1.99674	1.44611	3.3957	2.08257	4.45645	3.59584	3.74255	2.15035	-3.15133	-1.82534	-4.65455	-2.41468	-0.176158	-0.929608	-3.72365	-6.37981	-2.59147	-1.41933	1.56373	3.10466	3.9334	1.00962	1.53457	1.41113	1.72069	1.40113	0.742366	0.36032	0.382085	0.161637	1.55034	2.7695	3.54061	2.17461
	-4.65455	-2.41468	-0.176158	-0.929608	-3.72365	-6.37981	-2.59147	-1.41933	1.56373	3.10466	3.9334	1.00962	1.53457	1.41113	1.72069	1.40113	0.742366	0.36032	0.382085	0.161637	1.55034	2.7695	3.54061	2.17461	2.25151	2.67698	5.24574	2.52607	2.55854	2.48183	3.38602	2.29528	1.83458	3.40393	3.39773	2.74974	3.22586	3.60091	2.10254	3.14775	1.91271	2.20998	2.12973	2.59258	3.32337	3.98879	2.77954	2.16358	2.65578
	3.15499	2.19541	3.36553	4.17409	3.0708	4.08746	2.64467	2.45127	2.63007	-2.88502	-3.18398	-2.40025	-1.77414	-1.35222	-0.452278	-1.05028	-2.70157	-3.34614	4.3332	2.1812	2.53639	3.75559	3.2968	2.45754	2.69357	3.17154	2.38823	2.37921	4.12791	3.37403	2.19941	2.05946	4.3471	1.37738	1.05243	2.51131	2.61305	3.06277	0.830905	1.66908	1.68745	1.17817	3.0561	2.04364	2.67425	2.5957	2.84123	4.74808	2.97824
	2.5781	3.61724	2.02703	2.48936	3.71872	3.1638	3.78613	2.57139	3.5219	2.76363	-4.51492	-2.01571	-1.19544	-0.802774	-3.52444	-4.50688	-2.74823	-2.37736	-1.67551	-2.52785	-3.18003	-3.2212	-1.81823	-0.952074	-0.0782443	-0.34931	-0.387233	-0.53403	-0.0526405	-0.449309	-0.812988	-0.451028	-0.33377	-0.84731	0.922304	1.33362	1.58299	2.11855	2.88168	1.89771	0.644027	1.30672	1.63382	1.65619	0.72168	0.892269	1.58555	1.77865	3.28539
	1.58299	2.11855	2.88168	1.89771	0.644027	1.30672	1.63382	1.65619	0.72168	0.892269	1.58555	1.77865	3.28539	1.20655	-2.67444	-1.57768	-0.247254	-0.227635	-1.5064	-2.32094	-3.32229	-2.56439	-2.62923	-2.66098	-3.35277	-1.35907	-1.90346	-0.989752	-0.709277	-0.932536	-0.827504	-0.329237	-1.46154	-1.68388	2.49438	4.77419	1.31169	2.96585	2.73308	2.41376	3.45657	4.20015	2.33489	3.05255	2.03954	4.12286	3.02121	2.81982	4.9752
	4.68941	3.94363	1.44404	2.06534	4.06852	1.8545	3.18466	3.46547	2.20997	2.93267	4.59099	0.380136	0.958892	1.42583	2.14485	-1.17027	-2.10406	-2.31809	-2.18184	-1.30428	-1.06781	-1.65155	-4.1454	-3.10846	-3.28008	4.60571	1.54823	2.03188	5.16688	2.70127	1.46544	2.65102	2.97821	1.54813	2.22429	2.06156	3.34656	2.94595	1.79053	2.38455	3.72772	-2.92068	-1.39667	-2.2849	-1.90412	-0.246173	-0.526446	-1.9547	-1.88614
	2.81832	2.38434	4.84329	2.71669	4.55676	2.83877	3.48254	4.83067	1.5661	4.50521	2.25894	3.18088	5.59256	1.51979	3.32149	4.56324	2.84407	1.61871	2.2694	1.17208	3.68578	5.37524	3.26734	2.14517	3.08603	2.67163	3.91097	2.6994	2.31234	3.29416	3.63959	2.7869	1.51475	1.91812	3.79876	3.05767	2.91591	1.90707	2.16322	3.76444	2.56568	2.15706	3.0378	3.46149	0.96877	6.36966	2.53512	2.35146	3.43458
	1.91812	3.79876	3.05767	2.91591	1.90707	2.16322	3.76444	2.56568	2.15706	3.0378	3.46149	0.96877	6.36966	2.53512	2.35146	3.43458	5.2193	2.07039	3.14894	2.27804	2.37686	0.544101	1.4044	-5.32811	-4.15427	-1.10788	-2.75684	-3.83708	-2.41072	-0.855951	-0.651436	-1.60051	-1.41214	1.0425	2.1802	3.32949	3.78107	3.03977	1.6275	2.30377	4.19896	4.20017	4.06856	1.70895	2.38659	4.11311	2.63294	2.68199	0.592029
	1.42522	2.81826	4.30783	3.11435	2.88998	-2.12071	-1.57066	-1.70572	-0.245909	-1.89765	-0.98414	-3.29239	-3.86157	-4.22873	-2.05742	-1.10179	-4.27078	-2.79671	-1.05902	-1.04317	-1.25898	-2.46327	-1.26106	-0.903402	-0.807268	-0.467361	-0.231473	-2.32794	-3.64548	2.02065	1.53658	3.38567	5.24226	1.61386	3.8081	3.0202	3.27796	2.81086	4.3177	2.21602	2.73746	1.02775	4.01646	2.79269	2.36798	2.51004	3.86004	2.95833	1.34685
	-1.57066	-1.70572	-0.245909	-1.89765	-0.98414	-3.29239	-3.86157	-4.22873	-2.05742	-1.10179	-4.27078	-2.79671	-1.05902	-1.04317	-1.25898	-2.46327	-1.26106	-0.903402	-0.807268	-0.467361	-0.231473	-2.32794	-3.64548	2.02065	1.53658	3.38567	5.24226	1.61386	3.8081	3.0202	3.27796	2.81086	4.3177	2.21602	2.73746	1.02775	4.01646	2.79269	2.36798	2.51004	3.86004	2.95833	1.34685	3.22385	3.78842	2.17775	2.87737	0.744747	4.105
	-1.10179	-4.27078	-2.79671	-1.05902	-1.04317	-1.25898	-2.46327	-1.26106	-0.903402	-0.807268	-0.467361	-0.231473	-2.32794	-3.64548	2.02065	1.53658	3.38567	5.24226	1.61386	3.8081	3.0202	3.27796	2.81086	4.3177	2.21602	2.73746	1.02775	4.01646	2.79269	2.36798	2.51004	3.86004	2.95833	1.34685	3.22385	3.78842	2.17775	2.87737	0.744747	4.105	3.76428	1.41915	5.34347	2.99079	1.81628	2.75856	4.95796	3.92902	2.51075
	-0.467361	-0.231473	-2.32794	-3.64548	2.02065	1.53658	3.38567	5.24226	1.61386	3.8081	3.0202	3.27796	2.81086	4.3177	2.21602	2.73746	1.02775	4.01646	2.79269	2.36798	2.51004	3.86004	2.95833	1.34685	3.22385	3.78842	2.17775	2.87737	0.744747	4.105	3.76428	1.41915	5.34347	2.99079	1.81628	2.75856	4.95796	3.92902	2.51075	3.25612	2.59968	3.40529	-2.60246	-4.02744	-3.00118	-3.05569	-3.99992	-1.43033	-4.26231
	-3.16051	-0.841204	-1.9939	-0.815926	-1.14163	-2.09872	-5.1037	-4.84695	-2.3451	-1.70056	-1.07701	-1.42176	-1.89267	-2.1845	-0.898822	-1.4585	-0.613753	-0.198501	-1.14495	-3.59823	-1.2398	3.11387	3.93824	3.39916	4.1378	2.66682	3.02208	2.75868	3.40464	4.98321	1.41468	5.1263	3.02734	2.3286	2.94382	1.7133	2.73904	2.83751	3.19892	1.89437	4.62513	-2.69957	-2.47858	-2.68951	-4.43324	-2.89753	-4.7455	-3.03809	-0.690189
	-2.79467	-1.73468	-2.78598	-1.77072	-0.31027	-2.58308	-4.72124	-3.09956	-1.42564	-1.8502	-2.7525	-2.46439	-0.354713	-1.87667	-0.947309	-0.164348	-0.64155	-0.720461	-1.88876	-2.24968	-2.7992	1.892	2.91059	3.44543	2.34167	3.84047	3.37674	1.85875	3.34119	3.69572	2.14067	4.32436	1.18201	4.54518	1.59459	2.56203	3.24443	3.68926	1.56641	1.77534	3.0886	3.92491	2.29712	4.40159	3.92455	2.41742	4.07651	3.74583	2.47438
	-2.45161	-1.50721	-0.295622	-1.49308	-0.411705	-0.850654	-0.622376	-3.29707	-2.32763	-3.03596	-3.45255	-1.21759	-0.26821	-0.743499	-0.314122	-0.874335	-0.111965	-0.618207	-0.333383	-1.52232	-1.52727	-2.96264	-2.3222	-1.84083	-1.07935	-0.781006	-0.481315	0.5022	0.794773	0.916212	0.456629	0.934998	1.04485	1.31664	2.66105	1.22383	3.56384	1.45205	1.93531	3.46927	3.7843	2.49618	2.62604	3.3442	4.78784	1.71125	2.32308	2.39942	2.19744
	-1.04275	-2.01395	-3.21081	-2.88587	-2.84004	-0.895438	-3.14058	-1.46708	-1.66399	-0.178821	-1.20568	-0.255074	-0.158962	-0.344713	-2.51678	-4.45637	-1.08262	-1.49109	3.93665	4.30788	0.550352	5.50367	2.16725	0.887451	2.76201	1.83753	4.28823	4.58277	3.06551	3.31892	4.47882	2.64555	2.06028	5.05502	2.38872	1.79431	1.16426	1.51193	0.69834	1.59945	2.82022	3.5381	1.83345	2.66326	1.89377	3.23513	4.08252	2.00866	4.24822
	-1.40023	-0.320692	-0.888047	-0.366624	-1.45836	-4.99964	-2.51616	-3.31572	-2.62384	-0.943684	-1.11633	-0.199191	-0.736095	-0.224688	-0.666539	-0.676239	-0.786736	-0.538715	-5.24314	1.97721	2.0186	3.70835	2.26451	1.38663	4.58208	4.28424	1.97285	3.59736	2.98562	3.04566	3.12598	2.49347	4.51134	3.81485	2.39042	2.62595	1.55231	2.2998	2.3075	4.17388	2.41384	3.15945	3.89217	4.06606	3.75416	1.66495	3.13894	5.28149	1.8368
	1.19223	0.813685	1.14648	2.29524	4.92349	2.97141	1.95447	1.98762	4.06712	2.01378	2.96555	3.67669	-2.39946	-2.70306	-4.09662	-3.38607	-0.903516	-2.40313	-3.53637	-2.64004	-2.03813	-1.33652	-1.67854	-1.93889	-4.00642	-3.65367	-1.90001	-0.395387	-0.784494	-0.582294	-0.934685	-0.796646	-0.803932	-2.47434	-1.91941	3.5298	4.16716	0.990216	3.58706	1.98638	1.94609	3.93853	4.72278	3.76531	1.34289	2.82741	4.80597	2.4813	2.87151
	1.2623	-1.36848	-3.00614	-2.59718	-1.03019	-0.707094	-0.715283	-1.01054	-2.43494	-2.64447	-2.85082	-0.572966	-1.75693	-1.53006	-1.62592	-2.08444	-1.70762	-1.41875	-1.73959	-0.630659	-0.061026	-0.424794	-1.01774	-0.403437	-0.425435	-0.351255	-0.464014	-0.588324	-0.734187	-0.249422	-1.61234	-1.40736	1.14156	0.648028	0.384764	0.599199	0.750267	1.23177	0.136231	1.04174	1.72404	1.53144	2.33805	1.75491	1.60348	2.21914	-0.806717	-1.21535	-0.689401
	-0.233007	-1.00932	-0.290436	-0.401901	-0.231651	-0.116191	-0.943364	-0.0728538	-0.261236	-0.375607	-1.07681	-0.867775	-1.29036	-1.75392	-1.25066	1.95435	0.924619	1.13814	1.33787	1.4765	0.780552	1.58548	2.8474	1.22314	1.98394	1.7359	0.632621	0.85785	2.67792	3.01266	0.468443	0.844767	1.28802	1.17086	0.906504	3.28728	2.03583	0.807041	1.82116	2.06131	0.4168	-0.91642	-0.662206	-1.56532	-2.01325	-0.799209	-0.412357	-0.401228	-0.964348
	-0.454842	-0.351383	-0.707954	-0.228852	-0.245318	-1.18182	-1.62808	-1.59932	1.42103	1.94238	1.79186	0.905254	0.804524	2.59159	0.704156	1.96107	2.30718	1.39904	1.52617	1.12623	1.18067	0.587646	0.321864	0.438429	-0.934095	-1.19055	-1.4981	-2.18171	-1.44427	-0.604737	-1.96635	-1.74565	2.83377	3.14049	1.12324	1.41521	0.765148	2.21315	1.63244	0.913893	0.298718	0.595402	0.0830119	0.125228	0.89573	0.514534	0.178953	0.803366	0.914542
	2.30718	1.39904	1.52617	1.12623	1.18067	0.587646	0.321864	0.438429	-0.934095	-1.19055	-1.4981	-2.18171	-1.44427	-0.604737	-1.96635	-1.74565	2.83377	3.14049	1.12324	1.41521	0.765148	2.21315	1.63244	0.913893	0.298718	0.595402	0.0830119	0.125228	0.89573	0.514534	0.178953	0.803366	0.914542	1.85729	0.984919	1.80517	3.09966	1.71649	1.25625	0.49669	1.42069	1.2397	1.96628	1.86095	1.02358	1.39987	2.83897	0.992906	1.74237
	0.765148	2.21315	1.63244	0.913893	0.298718	0.595402	0.0830119	0.125228	0.89573	0.514534	0.178953	0.803366	0.914542	1.85729	0.984919	1.80517	3.09966	1.71649	1.25625	0.49669	1.42069	1.2397	1.96628	1.86095	1.02358	1.39987	2.83897	0.992906	1.74237	1.66832	1.40302	1.90887	1.70905	1.88935	1.54135	1.87896	0.757623	1.2236	3.32801	2.28019	1.16644	-0.344256	-0.344851	-0.950719	-1.16683	-0.778569	-1.67042	-1.56591	-1.46551
	1.66832	1.40302	1.90887	1.70905	1.88935	1.54135	1.87896	0.757623	1.2236	3.32801	2.28019	1.16644	-0.344256	-0.344851	-0.950719	-1.16683	-0.778569	-1.67042	-1.56591	-1.46551	-1.45625	-0.232106	-1.3267	-0.554082	-0.468727	-1.37941	-1.10741	-1.2046	-1.18712	0.989257	0.549572	1.53814	1.25408	1.0919	2.46968	1.41071	1.63952	1.97575	0.735994	1.65921	2.66557	-0.617954	-0.965707	-0.352494	-0.280721	-0.401475	-0.772131	-0.963529	-0.281924
	-2.13736	-1.39334	-0.612119	-0.769963	-1.23408	-1.22746	-1.24285	-0.590741	-0.260948	-0.534515	-0.788447	-0.258921	-0.440828	-0.829402	-0.576588	-0.74776	-2.2181	-1.8637	1.39019	1.59599	1.13982	1.31464	1.46319	1.58567	1.93734	0.991418	1.42748	1.68657	1.69974	2.47765	2.40378	0.79951	0.974151	1.15443	1.07731	1.87354	1.7755	0.677538	1.82759	1.75923	1.14952	0.404167	1.72922	1.57702	1.6326	1.96873	1.65727	1.32498	0.489277
	-2.2181	-1.8637	1.39019	1.59599	1.13982	1.31464	1.46319	1.58567	1.93734	0.991418	1.42748	1.68657	1.69974	2.47765	2.40378	0.79951	0.974151	1.15443	1.07731	1.87354	1.7755	0.677538	1.82759	1.75923	1.14952	0.404167	1.72922	1.57702	1.6326	1.96873	1.65727	1.32498	0.489277	1.46632	2.39292	2.47364	0.987739	0.715238	1.34912	1.30056	0.926707	-2.20584	-1.29579	-1.57999	-0.476185	-2.63863	-0.294841	-0.769623	-0.56894
	-0.143726	-0.450149	-0.670622	-0.121246	-0.449454	-0.101071	-0.551369	-0.64695	-0.226809	-0.0938443	-0.210376	-0.851915	-1.03339	-0.773993	-0.360151	-1.12635	-0.684401	-1.1278	-3.35164	2.24722	1.29168	1.40584	1.43587	0.904065	0.92736	1.42753	1.85954	1.80091	2.4556	1.34919	1.88205	1.02359	0.794904	1.61835	1.99699	4.74948	0.953104	1.25352	1.01235	0.752936	1.31611	2.70972	1.84056	1.16665	2.07914	1.18584	1.07963	1.97762	1.41747
	-0.851915	-1.03339	-0.773993	-0.360151	-1.12635	-0.684401	-1.1278	-3.35164	2.24722	1.29168	1.40584	1.43587	0.904065	0.92736	1.42753	1.85954	1.80091	2.4556	1.34919	1.88205	1.02359	0.794904	1.61835	1.99699	4.74948	0.953104	1.25352	1.01235	0.752936	1.31611	2.70972	1.84056	1.16665	2.07914	1.18584	1.07963	1.97762	1.41747	2.50604	1.43941	0.910342	-0.587315	-2.07803	-0.724431	-0.592986	-0.390396	-0.456253	-0.624091	-1.60469
	0.812679	-1.12347	-1.09619	-0.644507	-0.865523	-1.16504	-0.48816	-1.12393	-2.40045	-2.40459	-1.91577	-0.807644	-1.76541	-1.06924	-1.22505	-1.19441	-1.85615	-0.500375	-0.51459	-0.767442	-0.142786	-0.283759	-0.349631	-0.295433	-0.316694	-1.41132	-0.688872	-1.28866	-2.11952	2.99914	2.89016	1.86625	0.22363	0.568914	1.62302	3.1664	1.64346	1.30353	1.86184	1.21321	1.51226	-0.942561	-1.99085	-1.81195	-1.15372	-1.40553	-0.6251	-1.61746	-1.63111
	-1.09513	-2.23837	-2.30769	-1.2073	-0.38819	-0.30855	-0.0938809	-0.515263	-0.642509	-0.0985467	-0.211554	-0.716224	-0.333015	-1.84214	-1.19417	-0.335969	-1.64367	2.16929	2.27205	1.50747	0.571542	0.573207	1.69048	2.06909	1.46294	2.68299	0.659544	1.47823	2.38344	1.50561	1.8502	0.426152	1.03291	1.80001	0.343507	1.37843	0.648178	0.449385	2.13721	2.67552	2.07945	0.380193	0.0980763	0.871245	1.36021	2.24384	1.03888	0.946638	1.0634
	1.03291	1.80001	0.343507	1.37843	0.648178	0.449385	2.13721	2.67552	2.07945	0.380193	0.0980763	0.871245	1.36021	2.24384	1.03888	0.946638	1.0634	1.04092	0.511002	1.03701	0.784717	0.52144	1.28524	1.575	0.740638	0.976383	0.491676	0.786766	1.95066	1.28939	1.28892	2.7017	3.57194	1.30679	0.409768	0.447619	2.01797	1.49209	2.27395	2.55132	1.09041	0.283279	0.192337	1.20383	0.962644	1.78451	1.73736	0.829458	0.415754
	0.380193	0.0980763	0.871245	1.36021	2.24384	1.03888	0.946638	1.0634	1.04092	0.511002	1.03701	0.784717	0.52144	1.28524	1.575	0.740638	0.976383	0.491676	0.786766	1.95066	1.28939	1.28892	2.7017	3.57194	1.30679	0.409768	0.447619	2.01797	1.49209	2.27395	2.55132	1.09041	0.283279	0.192337	1.20383	0.962644	1.78451	1.73736	0.829458	0.415754	0.257656	-0.626236	-1.62001	-2.61245	-2.2558	-0.195642	-0.105717	-0.698267	-0.413117
	-1.07789	-0.996263	-0.208126	-0.31232	-0.455751	-1.48207	-1.48045	-2.02277	-2.22854	-1.58194	-1.3341	-2.001	-1.34136	-1.92983	-2.12123	-0.905471	-1.19955	-1.40006	-0.181086	-0.227775	-0.350827	-0.165802	-0.479378	-0.316981	-0.583464	-1.15845	-0.685143	-1.15457	-1.70529	-1.67915	1.81412	1.94853	1.33081	0.361136	0.965275	1.25027	1.96088	2.81167	1.49922	0.679468	1.65026	1.19008	2.10802	1.51423	0.391137	0.752487	2.45944	2.56324	2.58907
	-1.18433	-0.0769058	-1.25114	-0.0620348	-0.921464	-0.843849	-0.0979363	-0.186092	-0.203699	-0.56227	-0.515169	-0.950825	-0.350075	-0.210358	-0.877585	-1.43767	-2.10512	-1.35847	-0.409541	-1.37504	-1.91512	-0.819268	-1.91112	-0.516303	-1.64005	-2.02927	-3.17094	-2.84227	-1.93725	-1.12409	0.925604	0.638208	2.13875	2.7429	0.929066	0.0826205	0.21963	0.361421	0.461542	0.790225	0.280481	1.09626	1.12267	2.47063	2.65662	2.60829	0.431965	0.588363	1.02976
	0.790225	0.280481	1.09626	1.12267	2.47063	2.65662	2.60829	0.431965	0.588363	1.02976	2.15928	0.909461	1.58823	3.21922	1.1395	1.32516	2.50107	3.23049	0.613608	1.39362	1.68466	1.39695	2.24366	2.98226	1.06098	1.13702	1.06396	1.79488	2.29062	3.54702	1.17424	1.33048	1.509	0.914767	2.35665	2.48174	1.19512	0.191883	0.347712	1.11561	0.501854	0.235854	0.872981	2.55467	2.01914	1.83969	1.66585	0.659779	1.96319
	1.27658	1.89758	0.966128	1.62766	2.93375	0.451838	0.955089	2.40436	2.20106	1.29639	0.582616	1.06852	1.04077	1.38324	0.440248	1.9766	1.15988	1.00295	1.15309	2.96756	2.24466	1.30173	1.25659	0.884051	0.516261	1.0369	1.78606	0.449422	1.20008	0.757173	1.24978	2.26928	1.6177	2.68837	1.48139	0.779099	0.621894	1.42048	1.9413	1.16516	2.98281	1.40362	0.494094	1.61644	1.70523	1.90478	0.433127	0.737245	1.43791
	0.241967	0.869395	0.83102	1.25393	1.82838	1.06153	1.0925	0.33535	1.37912	2.14315	1.05269	1.13853	1.316	0.902795	0.26946	0.428949	0.771568	1.37342	0.801521	1.28875	0.978115	1.05215	0.967717	0.477545	0.677192	1.82901	0.939895	1.44418	2.15596	1.55889	1.31006	0.851481	0.474225	0.758612	0.576855	1.43712	1.97016	1.39603	1.09585	1.78973	1.03384	-0.529566	-0.551863	-1.41062	-2.03335	-1.94766	-1.57553	-0.615728	-1.77703
	1.78973	1.03384	-0.529566	-0.551863	-1.41062	-2.03335	-1.94766	-1.57553	-0.615728	-1.77703	-1.70952	-1.3228	-0.450499	-0.555746	-0.254119	-1.56865	-2.2723	-1.74713	-1.55856	-1.59785	-0.473685	-0.190273	-0.23455	-0.61391	-0.615461	-0.681297	-0.828384	-2.84508	-1.62334	-1.57654	1.4128	1.99075	1.21636	0.370432	0.89392	1.96566	3.5842	1.32694	1.16357	1.04675	0.437488	0.684238	1.34314	2.05984	2.06257	1.06151	1.98334	1.45203	2.60556
	-1.57553	-0.615728	-1.77703	-1.70952	-1.3228	-0.450499	-0.555746	-0.254119	-1.56865	-2.2723	-1.74713	-1.55856	-1.59785	-0.473685	-0.190273	-0.23455	-0.61391	-0.615461	-0.681297	-0.828384	-2.84508	-1.62334	-1.57654	1.4128	1.99075	1.21636	0.370432	0.89392	1.96566	3.5842	1.32694	1.16357	1.04675	0.437488	0.684238	1.34314	2.05984	2.06257	1.06151	1.98334	1.45203	2.60556	0.945423	2.11322	1.8641	2.00025	1.06136	1.01783	0.918089
	1.15003	1.20316	2.46718	1.86267	1.5913	1.89473	0.889066	1.47781	1.23491	1.97822	1.28258	1.25363	2.4225	2.07762	2.01324	2.12859	0.67376	1.04119	1.26274	1.53545	0.544071	1.14207	1.39094	1.60614	1.78434	1.40574	0.899585	1.06342	1.07415	1.22826	1.88953	0.954667	1.28327	0.899704	1.02781	0.71383	2.46542	1.68615	2.15692	3.10072	0.719859	0.310676	1.45346	2.69109	0.863717	3.28387	1.13647	1.19078	1.63015
	1.53545	0.544071	1.14207	1.39094	1.60614	1.78434	1.40574	0.899585	1.06342	1.07415	1.22826	1.88953	0.954667	1.28327	0.899704	1.02781	0.71383	2.46542	1.68615	2.15692	3.10072	0.719859	0.310676	1.45346	2.69109	0.863717	3.28387	1.13647	1.19078	1.63015	1.28602	0.55311	1.45269	1.33344	1.51279	1.53942	1.33621	2.47858	0.753282	2.05369	1.37855	0.270111	0.692997	1.15862	0.64863	0.869727	1.8821	1.6852	2.95871
	1.22826	1.88953	0.954667	1.28327	0.899704	1.02781	0.71383	2.46542	1.68615	2.15692	3.10072	0.719859	0.310676	1.45346	2.69109	0.863717	3.28387	1.13647	1.19078	1.63015	1.28602	0.55311	1.45269	1.33344	1.51279	1.53942	1.33621	2.47858	0.753282	2.05369	1.37855	0.270111	0.692997	1.15862	0.64863	0.869727	1.8821	1.6852	2.95871	1.48564	0.286696	-1.12985	-1.22017	-2.36707	-0.918552	-1.04774	-0.907451	-1.54131	-1.28585
	-2.5947	-1.3732	-1.05846	-2.32678	-0.9849	-2.16581	-2.30417	-0.29493	-0.0185691	-0.458002	-0.229854	-0.0815775	-1.18824	-0.160959	-0.62915	-0.46442	-0.105427	-1.60035	-2.20355	2.05524	0.814364	0.357111	1.40152	1.19185	1.32842	1.92408	2.38398	1.84639	1.12314	0.758947	0.754693	1.42923	2.6964	1.85911	0.283856	0.522014	0.722784	0.59674	1.18267	2.00191	3.75003	-1.44003	-0.442969	-1.54568	-1.08191	-1.03053	-0.19648	-0.76477	-1.93308
	0.88112	1.5211	2.13262	0.526151	2.35916	2.3456	0.81694	0.873752	2.14948	1.81785	2.34271	1.77983	1.84431	0.438545	0.975584	1.67464	1.91586	1.7745	1.28114	0.88355	0.864128	1.51369	1.76794	1.06872	0.905423	1.77355	2.10951	1.73002	0.646339	2.38823	1.00667	1.93053	0.80277	1.33707	2.26022	1.14808	1.7949	1.62363	1.74506	1.51694	1.23666	-0.74438	-1.07118	-1.65638	-2.03375	-2.01518	-1.2449	-0.828901	-0.640873
	-0.493005	-0.0235277	-0.245303	-0.162291	-0.517331	-0.550712	-0.708249	-0.93359	-1.08405	-1.01704	-1.47678	-1.44553	-1.83354	-1.51269	-0.46161	-1.49906	-2.76969	-1.63903	-2.86643	-2.44999	-0.668772	-0.339985	-0.83651	-0.0685946	-2.79118	0.149881	3.26953	1.05327	1.02706	1.70555	1.07749	1.1781	1.59157	0.897248	0.29261	0.624481	0.888847	1.33533	2.5444	2.70085	1.2698	0.114033	0.801736	1.44553	2.1825	2.68376	0.59286	0.46884	1.61321
	3.26953	1.05327	1.02706	1.70555	1.07749	1.1781	1.59157	0.897248	0.29261	0.624481	0.888847	1.33533	2.5444	2.70085	1.2698	0.114033	0.801736	1.44553	2.1825	2.68376	0.59286	0.46884	1.61321	1.18691	1.23803	1.44259	1.69362	0.63201	0.947061	0.1926	1.08509	1.61766	2.06543	1.68979	1.28884	0.639014	0.469063	1.06934	1.73199	1.13157	2.31106	2.00652	2.55977	1.00049	1.02932	2.24213	0.74886	0.556574	2.10425
	1.44553	2.1825	2.68376	0.59286	0.46884	1.61321	1.18691	1.23803	1.44259	1.69362	0.63201	0.947061	0.1926	1.08509	1.61766	2.06543	1.68979	1.28884	0.639014	0.469063	1.06934	1.73199	1.13157	2.31106	2.00652	2.55977	1.00049	1.02932	2.24213	0.74886	0.556574	2.10425	0.969503	1.47847	1.03195	1.05942	1.72668	2.33128	3.00847	1.78077	0.309627	-0.839254	-1.10494	-0.571607	-1.16673	-1.36439	-0.963514	-0.56799	-0.397328
	-0.340566	-0.306347	-0.476793	-0.80681	-0.879255	-0.881107	-1.47562	-0.619031	-1.30098	1.55445	0.989444	0.559443	2.1763	0.130716	1.01583	1.4106	1.17022	3.29824	1.4694	0.702834	1.03948	1.41501	1.22106	2.08518	0.773617	3.20737	3.83783	1.35884	1.3724	1.61221	1.47205	1.17438	2.27075	1.89214	2.4738	1.47632	1.35249	1.53568	2.17866	2.60443	1.8839	-0.610383	-0.954418	-0.199517	-0.712889	-0.563189	-1.12003	-1.84101	-2.11771
	NaN	NaN	NaN	NaN	NaN	NaN	NaN	NaN	NaN	NaN	NaN	NaN	NaN	NaN	5.28885	0.830564	1.81435	3.17029	3.23438	1.65763	2.45839	2.45652	3.32731	-2.29306	-1.16189	-2.6478	-0.157362	-1.47736	-0.196008	-0.421421	-0.519761	-1.34005	-2.51427	1.92244	3.10517	3.99633	4.12152	1.90872	2.1059	2.81443	2.90624	1.38079	2.39799	1.57315	3.27086	4.35611	2.12795	3.08154	1.63461
	2.41264	4.0823	2.18583	1.77051	2.89439	0.322013	1.87354	2.59779	1.59692	2.12901	1.53371	1.65133	1.46108	1.39811	1.62618	0.285102	2.85254	1.24822	0.740004	2.04379	1.39336	0.378972	0.766394	0.558629	0.400317	0.780662	3.29303	2.74446	2.87987	1.12666	0.840898	2.30181	2.18117	3.60463	2.5558	1.63983	2.93301	2.76991	2.35513	1.85168	1.50388	-1.96931	-0.143491	-1.81169	-2.1413	-2.29078	-0.904535	-1.36876	-0.473591
	2.39576	2.68127	2.76759	3.72792	1.56251	3.82723	3.07149	5.43289	1.71069	2.36261	2.83287	3.95506	1.04736	2.97676	1.93744	3.71222	2.416	2.27141	3.10348	3.18235	3.28489	1.35678	2.53559	2.58998	4.17499	2.24805	1.83458	3.39141	3.2079	2.98993	1.42666	1.41143	1.97474	1.85772	2.16816	1.46187	1.50496	2.10435	2.18448	2.62572	3.54396	1.8281	2.64839	2.24891	2.19283	2.07941	2.62315	2.51625	1.4854
	1.71069	2.36261	2.83287	3.95506	1.04736	2.97676	1.93744	3.71222	2.416	2.27141	3.10348	3.18235	3.28489	1.35678	2.53559	2.58998	4.17499	2.24805	1.83458	3.39141	3.2079	2.98993	1.42666	1.41143	1.97474	1.85772	2.16816	1.46187	1.50496	2.10435	2.18448	2.62572	3.54396	1.8281	2.64839	2.24891	2.19283	2.07941	2.62315	2.51625	1.4854	3.51195	3.77855	0.924928	2.72826	2.33919	2.88359	1.26586	1.11831
	2.50304	2.71044	3.02026	3.26566	2.15359	2.57727	1.95474	5.24894	3.03647	1.38844	2.46094	3.37312	4.48316	1.58864	1.35281	4.5246	3.19333	1.44224	1.45603	2.94654	4.96801	1.90907	1.64556	2.19047	3.19142	2.56468	2.20543	1.84045	1.46848	2.04552	3.18708	1.99019	2.74095	3.62784	2.37314	3.0275	2.52751	3.22323	2.0479	1.97927	0.267181	1.66153	1.89002	1.50318	2.04677	1.67222	1.66816	2.03635	2.38408
	3.19333	1.44224	1.45603	2.94654	4.96801	1.90907	1.64556	2.19047	3.19142	2.56468	2.20543	1.84045	1.46848	2.04552	3.18708	1.99019	2.74095	3.62784	2.37314	3.0275	2.52751	3.22323	2.0479	1.97927	0.267181	1.66153	1.89002	1.50318	2.04677	1.67222	1.66816	2.03635	2.38408	1.81015	1.2557	3.99622	3.26428	1.83496	1.39632	2.43456	3.71043	-2.31499	-1.91701	-3.18704	-2.00642	-4.0166	-0.457084	-2.15944	-2.8187
	2.23721	3.22299	2.76984	1.93244	2.01568	2.38415	2.34992	1.59639	2.98849	1.32236	-0.995928	-2.66951	-1.94253	-2.12998	-2.22755	-1.13312	-1.46421	-1.87323	-1.77351	-2.54111	-1.93595	-2.72878	-2.56601	-2.24565	-1.27715	-0.136183	-0.600822	-0.27542	-0.0960267	-0.285511	-0.266758	-1.13254	-0.923773	-3.87318	3.50726	2.45331	3.081	2.46801	2.06667	4.25793	1.97351	3.70407	3.00756	2.25537	2.80204	1.09072	1.9611	2.18134	2.65419
	1.73226	3.59785	2.83901	2.49241	3.67253	1.93272	4.7023	0.952	3.36201	2.58586	1.56051	2.80618	1.72814	2.91635	2.44168	2.23417	3.10137	3.29601	3.8505	2.01165	2.73207	2.2966	3.61931	1.91242	2.84065	1.71669	3.39251	2.74015	3.14489	4.62812	2.36898	2.19436	2.76783	2.66469	2.20833	3.66771	1.60326	2.41553	2.85378	2.34594	3.62559	2.0945	3.34122	2.70125	1.80995	2.23253	2.92429	4.25379	1.41966
	2.07734	2.39206	3.60264	2.7792	1.40856	1.77474	1.47727	2.95738	2.29702	2.45132	1.88323	1.88765	3.0993	2.89142	2.56818	1.64369	1.41139	1.35494	2.85092	2.38381	2.37189	2.67513	2.6911	2.75601	2.63474	1.48697	1.75064	1.06544	2.67299	2.53386	3.05208	3.09114	1.75452	3.43829	1.00056	2.30105	1.65494	3.01754	2.266	2.88403	1.76591	1.52755	1.38861	2.80132	3.01782	2.29299	2.36763	1.05501	2.31712
	1.05501	2.31712	3.28039	3.40266	2.3789	2.36424	3.93714	2.90541	2.13296	3.42283	3.18654	2.70456	1.75694	1.23177	2.46004	2.85999	2.39387	2.86349	1.2576	1.8328	1.28629	1.60372	3.33323	2.42861	2.95097	1.93604	3.59899	2.63425	2.25045	3.16675	2.55972	3.92953	1.89616	1.9738	1.85088	1.9215	2.88425	1.80523	1.99215	2.12842	0.956425	0.11846	2.1889	2.67883	1.30031	2.30511	2.06477	1.77336	3.02609
	1.8328	1.28629	1.60372	3.33323	2.42861	2.95097	1.93604	3.59899	2.63425	2.25045	3.16675	2.55972	3.92953	1.89616	1.9738	1.85088	1.9215	2.88425	1.80523	1.99215	2.12842	0.956425	0.11846	2.1889	2.67883	1.30031	2.30511	2.06477	1.77336	3.02609	2.70458	1.83614	2.17809	1.3406	1.21672	2.53907	1.75343	2.52156	2.70347	1.69644	2.72019	-2.45112	-2.61548	-2.08283	-2.83734	-1.20008	-2.09581	-0.804344	-0.659206
	-1.20008	-2.09581	-0.804344	-0.659206	-0.504016	-0.824115	-0.468119	-1.03271	-1.32207	1.85547	1.48647	4.10332	2.55475	0.851025	2.39643	2.0797	2.37098	2.7077	2.80893	2.08698	2.46744	2.89923	-2.00356	-1.42214	-2.33787	-1.45736	-1.24821	-1.88291	-0.894954	-2.17936	0.357347	1.45188	2.1314	3.65721	2.91328	2.66593	2.35906	2.64034	2.3798	2.41991	2.05833	1.05096	1.44409	1.19534	1.96547	2.23848	2.29425	1.61428	2.49293
	3.05265	2.1668	1.58184	2.92271	1.56926	1.06336	1.49346	2.61149	1.68894	3.18322	1.8139	1.40411	2.48314	3.39992	3.66052	2.55896	1.48085	0.929919	3.3356	2.81674	2.11689	1.50392	1.60236	1.66709	4.09665	1.82243	2.80204	2.05092	2.13131	2.971	2.3904	3.6995	2.38129	2.70408	2.7233	3.19508	1.68254	2.95519	1.61094	3.43366	1.96005	1.35355	3.12031	3.66034	2.73455	3.52922	1.54963	3.60508	2.22966
	3.18322	1.8139	1.40411	2.48314	3.39992	3.66052	2.55896	1.48085	0.929919	3.3356	2.81674	2.11689	1.50392	1.60236	1.66709	4.09665	1.82243	2.80204	2.05092	2.13131	2.971	2.3904	3.6995	2.38129	2.70408	2.7233	3.19508	1.68254	2.95519	1.61094	3.43366	1.96005	1.35355	3.12031	3.66034	2.73455	3.52922	1.54963	3.60508	2.22966	3.57911	1.02584	3.74009	4.17672	2.17153	2.07025	2.11228	4.43353	2.37093
	3.52922	1.54963	3.60508	2.22966	3.57911	1.02584	3.74009	4.17672	2.17153	2.07025	2.11228	4.43353	2.37093	2.84699	1.90329	4.86486	1.61685	2.53127	2.73647	2.80444	3.62745	1.07522	1.97016	1.77644	1.14371	1.78079	2.17607	2.15288	2.11811	2.53206	2.9302	2.93222	3.23047	2.20975	3.02624	3.18293	2.02627	2.3883	2.71309	3.09959	3.39577	2.91627	1.7567	1.65373	2.71777	2.37026	2.86261	3.06877	4.23722
	1.52346	2.45937	2.13583	4.31409	1.59231	2.23336	2.46074	1.76227	2.81394	2.63703	2.03537	4.79089	1.54365	2.82209	1.65213	2.86202	2.60726	2.30349	1.7036	1.39128	2.68304	2.14678	3.29616	1.74502	2.20709	1.26985	2.60745	2.79417	1.76052	2.54097	1.25979	2.00162	2.61686	2.1142	1.64984	1.52844	2.72234	2.51647	3.4968	2.08532	2.2552	0.933689	3.33185	4.22159	2.29005	2.20788	3.05993	2.66988	3.05262
	1.50271	2.48731	2.27906	1.96793	2.4355	0.767441	0.737093	2.54372	2.92371	2.10154	2.80192	1.42204	1.78295	2.96173	2.75124	3.31256	1.75521	2.945	2.44405	3.45195	2.41958	1.22361	2.25768	1.641	2.1332	2.17834	2.35927	2.32041	1.2231	2.15253	1.78652	1.87613	2.51258	1.83528	2.45077	3.68287	1.49382	1.99318	1.3986	2.3176	3.75824	1.53881	2.4689	1.58867	1.18774	1.37682	1.37956	2.51857	2.932
	-2.4561	-3.04382	-0.875708	-1.03931	-1.48518	-1.76273	-1.03502	-0.415971	-0.163201	-0.326104	-0.801886	-2.09043	-1.21214	1.70644	2.3979	2.42578	3.90865	3.65052	1.19225	0.90438	1.12307	2.04219	4.94466	2.08391	2.29071	0.859604	2.06629	3.43748	2.2145	2.39042	1.9894	1.64215	2.75707	2.10767	2.60409	2.14709	1.39268	3.77901	1.97063	2.4168	1.74416	1.64344	3.82538	2.05701	-2.48113	-1.96278	-2.96009	-3.70629	-1.60531
	0.232382	0.0615932	0.103253	0.134047	0.0864551	0.120925	0.0907469	0.0860353	0.0837673	0.167787	0.057833	0.141239	0.044112	0.0593424	0.0646338	0.0928306	0.0588481	0.189629	0.0871402	0.0138059	0.030541	0.0751526	0.00679811	0.0931764	0.0936528	0.0604927	0.188293	0.0181076	0.0159009	0.173062	0.398135	0.324338	0.484066	0.430001	0.0438714	0.100994	0.0899337	0.250138	0.0847731	0.150747	0.287708	0.0299889	0.171751	0.243164	0.474702	0.632283	0.00984162	0.294069	0.130567
	0.287708	0.0299889	0.171751	0.243164	0.474702	0.632283	0.00984162	0.294069	0.130567	0.250146	0.344446	0.941215	0.478518	0.344255	0.253025	0.262901	0.20723	0.0450292	0.56884	0.562964	0.0625781	0.149287	0.291455	0.353065	0.195136	0.437313	0.41902	0.207473	0.169051	0.223262	0.35479	0.107039	0.215665	0.545195	0.859942	0.824461	0.904162	0.369643	0.672597	0.882382	0.766196	0.579954	0.54033	0.497613	0.322824	0.273568	0.47721	0.965041	0.87317
	0.632283	0.00984162	0.294069	0.130567	0.250146	0.344446	0.941215	0.478518	0.344255	0.253025	0.262901	0.20723	0.0450292	0.56884	0.562964	0.0625781	0.149287	0.291455	0.353065	0.195136	0.437313	0.41902	0.207473	0.169051	0.223262	0.35479	0.107039	0.215665	0.545195	0.859942	0.824461	0.904162	0.369643	0.672597	0.882382	0.766196	0.579954	0.54033	0.497613	0.322824	0.273568	0.47721	0.965041	0.87317	1.10029	0.44321	0.611178	1.56008	2.94175
	-1.25812	-1.50111	-1.2143	-0.260443	-0.622231	-1.40961	-3.9328	-3.51801	-2.26875	-1.04936	-1.6264	-0.428664	-0.203484	-0.304354	-0.440537	-1.05657	-0.745204	-0.667092	-0.261349	-0.450075	-0.946691	-0.425803	-1.45249	-1.35477	-1.34412	0.432261	0.59011	1.21858	1.32778	0.957631	1.98428	1.05103	1.12724	1.67222	1.25626	0.484372	1.08201	1.6993	1.41805	1.14454	1.42526	0.574412	0.229338	0.368449	1.57328	0.902665	0.372121	0.429201	0.48749
	-0.7176	-0.499406	-0.291783	-0.120333	-0.891217	-0.916532	-2.01526	-1.19833	-3.25472	-3.43208	-1.24917	-1.88629	-1.37767	-3.2883	-2.11187	-2.73052	-1.2199	-1.38091	-2.14907	-0.41958	-0.842338	-0.785203	-0.515386	-0.405773	-0.301965	-0.299704	-0.0833651	-0.0952136	-0.910081	-0.772796	-0.93417	-0.516034	-0.617453	-1.50573	1.03155	1.29298	0.409656	1.90559	0.775283	0.642101	1.03748	1.40081	1.2398	1.43274	2.2721	2.33464	2.49551	1.90551	1.50104
	-0.376844	-0.205746	-1.03917	-0.880939	-0.288333	-1.08501	-1.59338	1.25518	1.16627	1.05623	1.33521	0.468271	0.468231	1.30822	1.83054	2.99447	2.19079	1.35869	0.878745	0.238971	1.85012	1.05343	2.93046	2.93467	1.20193	1.14662	1.13139	0.406728	0.537194	1.0961	1.61389	1.14931	0.754089	0.530969	1.085	1.10102	0.22964	0.911807	0.727017	1.02763	1.0224	1.28247	1.86972	0.682992	1.38845	3.15907	1.36293	2.07456	2.98252
	1.41882	1.64031	0.461755	2.95812	3.16327	0.665706	1.05059	1.25523	1.05181	1.20674	0.782657	2.1474	2.61415	1.24671	0.665091	0.445028	0.0416072	0.754201	-1.72684	-1.58172	-1.45706	-0.566189	-0.320422	-0.349376	-0.404045	0.897519	1.66624	3.38715	1.0059	1.50219	1.74476	1.30565	3.92599	1.94794	2.47528	2.38633	2.5443	1.37773	0.748016	2.03686	2.48792	0.38519	0.49797	0.225055	0.155242	0.255269	0.189813	0.0822849	0.302463
	2.5443	1.37773	0.748016	2.03686	2.48792	0.38519	0.49797	0.225055	0.155242	0.255269	0.189813	0.0822849	0.302463	0.240561	0.74107	0.567346	0.545556	0.710304	-0.473455	-0.423438	-0.188648	-0.243614	-0.237192	-0.489745	-0.160121	-0.368926	-0.0187643	-1.18237	-0.765928	-0.612507	0.348738	0.678367	0.99354	0.292574	0.63624	0.855385	1.65743	1.76979	2.33054	0.930575	1.71586	0.388215	1.39897	0.862809	0.833617	1.5732	1.34893	1.766	0.843656
	1.58212	1.94838	0.755071	1.57067	3.66353	2.66369	1.14889	1.05101	1.39167	2.13809	3.18588	2.9689	1.34852	1.33388	2.52646	3.54376	1.94896	1.8153	1.02272	1.08977	3.36807	2.13127	0.962515	0.185542	0.0431411	1.05725	0.808189	0.873654	0.27002	2.74867	3.21791	1.16554	1.40158	1.7721	2.69505	2.9416	1.10218	1.91432	3.30475	0.285735	1.88184	1.93598	0.930537	1.74542	2.59669	1.16514	0.344165	3.0468	2.05157
	3.0468	2.05157	0.488572	0.606082	1.47773	2.32671	2.59386	0.454719	0.604433	0.85979	2.63958	1.60397	1.69032	0.548363	1.11073	0.599224	0.786481	0.47812	0.326749	0.982209	0.995736	2.1652	1.82838	1.85266	1.53727	0.801282	1.54671	1.61472	2.04796	1.74225	1.8159	2.27338	2.84733	0.88245	2.43273	1.16293	2.82375	0.353248	1.72351	2.0657	3.65466	1.36684	2.29671	1.29916	2.18923	1.65693	1.17863	1.00099	1.49612
	1.72642	1.22119	2.91087	2.73192	1.64433	1.35557	1.24784	2.40294	3.10541	1.07166	0.895337	1.42225	1.6404	0.802281	2.55125	2.35695	1.37487	0.910005	1.39053	1.01702	2.01903	1.55094	2.86269	2.31571	0.743981	1.63507	4.16311	1.91531	2.1951	1.55041	1.01892	3.09838	1.01299	2.25808	3.31603	0.175421	0.102808	0.132675	0.17058	0.609987	0.137208	0.283092	0.181539	0.763117	0.599218	0.151349	0.318851	0.361966	0.904261
	0.802281	2.55125	2.35695	1.37487	0.910005	1.39053	1.01702	2.01903	1.55094	2.86269	2.31571	0.743981	1.63507	4.16311	1.91531	2.1951	1.55041	1.01892	3.09838	1.01299	2.25808	3.31603	0.175421	0.102808	0.132675	0.17058	0.609987	0.137208	0.283092	0.181539	0.763117	0.599218	0.151349	0.318851	0.361966	0.904261	0.27293	0.962705	1.18368	2.17865	0.702515	0.0426597	0.0504622	0.0136665	0.135798	0.00510949	0.0494648	0.0497467	0.0270952
	0.684428	2.17972	1.57694	3.36055	1.55659	4.4105	2.31025	1.24801	1.52355	2.07183	2.66772	1.28833	0.929018	1.29882	2.52448	-1.81626	-1.61182	-0.0628699	-0.0888672	-0.931061	-2.70795	-1.98612	-0.772942	-0.215337	-1.7933	-1.81493	0.645844	1.50054	1.14039	0.435993	0.937133	0.717353	1.13652	0.695944	2.99461	0.978726	0.993722	0.764932	1.81408	2.00388	1.52965	1.04413	2.72065	1.12351	1.16872	1.33223	1.26545	0.345826	1.02405
	4.4105	2.31025	1.24801	1.52355	2.07183	2.66772	1.28833	0.929018	1.29882	2.52448	-1.81626	-1.61182	-0.0628699	-0.0888672	-0.931061	-2.70795	-1.98612	-0.772942	-0.215337	-1.7933	-1.81493	0.645844	1.50054	1.14039	0.435993	0.937133	0.717353	1.13652	0.695944	2.99461	0.978726	0.993722	0.764932	1.81408	2.00388	1.52965	1.04413	2.72065	1.12351	1.16872	1.33223	1.26545	0.345826	1.02405	1.09765	0.293765	-0.309815	-1.28097	-2.03291
	-3.2503	-2.1946	-1.0542	-0.353233	-2.7848	-2.27272	-2.53748	-1.26669	-1.35904	-1.51005	-2.52356	-0.243615	-0.0809149	-0.813926	-0.366669	-0.158821	-0.742069	-2.75314	-2.53235	-2.40177	-0.977201	-3.45037	-3.64217	-0.643172	-0.972031	-0.175164	-2.25932	-2.60272	-1.20293	-1.63135	-1.11452	-0.809565	-0.587316	-0.919678	-1.67709	1.53227	0.981781	2.0955	0.982047	2.98458	2.19799	3.01846	1.84156	2.41007	3.24139	1.67514	1.79566	2.01374	2.25999
	-1.64134	-2.17718	-1.30742	-0.756107	-1.22737	-2.00938	-2.15979	-1.45292	-2.47072	-2.83012	-2.05698	-2.04607	-1.90338	-1.71686	-2.69944	-0.407596	-0.923225	-0.726311	-0.674031	-0.266356	-0.415125	-2.78601	-2.42307	2.88091	2.39327	1.70048	2.25399	2.33686	3.50151	1.94259	2.09799	1.01982	2.76457	1.238	1.69656	2.08806	0.743626	0.528494	1.7794	3.03357	1.26124	1.85099	-2.27426	-1.67896	-1.5752	-0.643295	-0.575616	-3.27757	-2.15984
	1.79592	3.36738	3.13194	0.884915	1.94165	2.76424	3.45053	0.489317	1.54582	3.65037	2.68045	1.70964	1.59315	-1.8694	-1.74702	-1.276	-2.40758	-3.08552	-3.20771	-1.41016	-1.07922	-0.856471	-0.309049	-0.203744	-0.577439	-0.298528	-0.0854549	-0.70593	-1.31916	-1.226	-0.811383	-1.66853	-1.04187	1.39354	3.49659	1.75913	1.28023	1.37716	2.89028	1.56166	2.66341	0.822411	3.85591	1.20551	2.36511	2.38657	0.0451748	0.836378	1.62005
	-1.19459	-0.524351	-0.269268	-1.63022	-1.20464	2.19235	1.98378	3.02516	2.74755	1.62676	2.67456	0.847784	1.08179	2.8314	1.75462	2.33972	2.96205	0.341597	1.41865	2.29979	1.96776	1.90013	1.65612	0.889143	1.31044	1.9238	2.30443	3.01101	0.281017	0.546939	1.41827	2.59045	1.49319	2.60328	1.96262	1.98086	0.471135	2.36948	3.26294	2.42604	1.70848	1.50565	3.69128	1.95232	2.17815	1.99415	2.85146	1.17199	0.935107
	-1.00021	-1.21135	-1.45473	-1.9531	-0.497216	-1.75982	-2.21483	-1.9209	1.83745	1.71188	3.32028	1.64924	1.86334	1.97737	2.36995	1.47983	2.69543	2.06798	1.45983	1.42457	1.6203	2.67758	-2.14714	-0.991145	-0.401776	-1.16955	-2.45658	-3.00656	-1.05663	1.96126	2.22733	1.62338	2.16742	1.06272	0.440811	1.08307	1.12237	1.54344	1.79694	1.62435	1.18758	-0.902185	-2.25117	-1.39008	-0.384612	-2.81634	-1.87106	-2.00184	-2.26853
	-0.486355	-0.385034	-0.660736	-0.759184	-0.691794	-1.60451	-1.46247	-1.72455	-2.26916	-1.49033	-1.7589	-1.26695	-2.17718	-3.94524	-1.88924	-0.958196	-1.0835	-1.05422	-0.42919	-1.62513	-3.44999	-2.09081	-1.09457	-1.68488	-1.22032	-1.28591	-1.76508	-1.14564	-0.38648	-0.239906	-0.318277	-0.928398	-1.58814	-2.60933	-1.69331	1.94017	1.54434	2.66704	1.45142	2.85548	2.44477	2.97583	2.7714	1.82857	3.27364	1.35726	1.87533	1.076	0.492435
	1.82857	3.27364	1.35726	1.87533	1.076	0.492435	2.06494	1.54367	0.460311	1.00973	0.811784	-2.22366	-1.90737	-1.41492	-0.435679	-1.20298	-0.64011	-2.80854	-3.00759	-2.85778	-2.46214	-1.02809	-1.87391	-2.32957	-2.05332	-2.30287	-2.37947	-1.22048	-0.992282	-1.58257	-1.37177	-0.906683	-0.347646	-0.601465	-0.256554	2.81101	3.72466	1.13184	2.13113	2.56226	1.22051	0.219532	0.507002	1.67888	1.11541	1.34007	1.88901	2.65435	2.94443
	2.06494	1.54367	0.460311	1.00973	0.811784	-2.22366	-1.90737	-1.41492	-0.435679	-1.20298	-0.64011	-2.80854	-3.00759	-2.85778	-2.46214	-1.02809	-1.87391	-2.32957	-2.05332	-2.30287	-2.37947	-1.22048	-0.992282	-1.58257	-1.37177	-0.906683	-0.347646	-0.601465	-0.256554	2.81101	3.72466	1.13184	2.13113	2.56226	1.22051	0.219532	0.507002	1.67888	1.11541	1.34007	1.88901	2.65435	2.94443	1.90473	1.94499	2.76837	3.60435	1.22083	2.74216
	-0.992282	-1.58257	-1.37177	-0.906683	-0.347646	-0.601465	-0.256554	2.81101	3.72466	1.13184	2.13113	2.56226	1.22051	0.219532	0.507002	1.67888	1.11541	1.34007	1.88901	2.65435	2.94443	1.90473	1.94499	2.76837	3.60435	1.22083	2.74216	1.87639	1.30798	1.73876	3.29543	2.17945	0.182715	1.76577	1.65353	1.70394	2.38342	0.583596	0.654544	0.968642	0.771862	1.91835	1.96435	2.89429	2.15534	2.65043	2.57533	1.53476	1.83414
	2.69597	1.01359	1.96836	2.58735	3.17115	1.35452	2.515	3.93334	2.92011	0.941065	2.13698	2.67789	3.36608	2.15736	0.218875	2.74981	1.78064	2.21513	1.8758	1.92193	2.97603	2.44408	2.78891	1.166	2.48047	2.58647	1.2261	1.313	2.45885	1.37807	1.55236	2.05011	1.79156	0.601338	1.75535	0.560177	0.746327	0.823062	4.2865	2.92064	2.51005	0.388077	0.544343	0.514615	0.244178	0.306538	0.581725	0.905461	0.970535
	-0.824565	-2.87129	-1.75729	-2.2762	-2.45846	-0.587413	-1.08185	-1.16104	-1.42917	-1.3385	-2.05057	-1.99251	-3.20032	-0.276976	-1.83414	-1.65846	-1.25149	-2.96046	-2.02076	-2.32752	-3.22078	-1.68096	-0.445448	-0.387905	-0.299479	-0.429803	-0.751343	-0.27775	-2.63116	-2.69119	-2.14919	-1.24339	-3.07427	4.88401	2.21216	1.88098	2.87319	1.86627	1.94741	3.60684	3.1944	2.32224	1.46816	2.38511	2.46594	3.6676	2.90682	2.24575	1.86607
	2.52222	2.02304	2.67051	2.14504	1.76629	3.62605	3.15266	2.03099	1.77784	2.75028	-2.40999	-0.630571	-3.54588	-2.2549	-0.130934	-0.585488	-0.220987	-3.55405	-0.424438	-0.523142	-3.30489	-0.348767	-1.13036	-3.03986	-1.52268	-0.802314	-0.425107	-2.26764	-1.32125	-2.94868	2.04586	0.683056	2.08507	3.49028	2.0886	1.38089	0.680099	0.512091	0.863103	0.331918	0.558376	-1.19702	-2.1342	-1.39054	-1.84963	-1.54756	-4.22179	-2.67695	-2.18353
	-1.06234	2.24787	1.52752	1.87301	2.04251	2.2491	1.39235	2.49655	2.51142	0.486001	0.969263	0.428169	2.34188	2.57325	1.83399	2.36812	0.170753	1.05381	2.12382	3.3477	1.59568	1.85214	2.3264	3.56311	3.64746	0.360721	-0.344267	-1.46172	-0.529271	-1.16484	-0.574972	-3.99145	-3.40915	-3.60822	1.37654	1.48362	1.57715	1.6021	0.357947	0.293612	0.337317	0.0942935	0.135969	1.06797	1.84542	3.24859	1.98444	1.39034	1.96021
	0.428169	2.34188	2.57325	1.83399	2.36812	0.170753	1.05381	2.12382	3.3477	1.59568	1.85214	2.3264	3.56311	3.64746	0.360721	-0.344267	-1.46172	-0.529271	-1.16484	-0.574972	-3.99145	-3.40915	-3.60822	1.37654	1.48362	1.57715	1.6021	0.357947	0.293612	0.337317	0.0942935	0.135969	1.06797	1.84542	3.24859	1.98444	1.39034	1.96021	3.0329	2.31859	1.95873	1.53054	2.1436	2.18207	1.95929	1.69431	0.834313	2.50042	2.65167
	-2.94744	-3.72952	-2.11183	-3.28296	-5.10731	-2.13589	-2.62284	-3.95396	-2.28248	-1.47925	-2.32094	-1.56684	-0.690316	-1.28974	-2.24544	-3.65368	-3.35616	-2.47326	-2.41076	-2.65225	-1.87861	-1.88276	-1.33898	-0.430552	-1.00424	-0.562957	-0.25602	-0.976766	-1.76352	-2.41536	-0.778888	0.236014	1.34902	2.28647	2.90962	1.20173	4.81963	2.48526	3.86329	1.87822	0.430191	0.308117	1.22551	0.808649	1.91969	0.852463	2.05969	3.28524	2.16606
	-2.62284	-3.95396	-2.28248	-1.47925	-2.32094	-1.56684	-0.690316	-1.28974	-2.24544	-3.65368	-3.35616	-2.47326	-2.41076	-2.65225	-1.87861	-1.88276	-1.33898	-0.430552	-1.00424	-0.562957	-0.25602	-0.976766	-1.76352	-2.41536	-0.778888	0.236014	1.34902	2.28647	2.90962	1.20173	4.81963	2.48526	3.86329	1.87822	0.430191	0.308117	1.22551	0.808649	1.91969	0.852463	2.05969	3.28524	2.16606	1.95726	2.42137	2.24741	-3.85407	-2.00931	-2.09933
	-1.33898	-0.430552	-1.00424	-0.562957	-0.25602	-0.976766	-1.76352	-2.41536	-0.778888	0.236014	1.34902	2.28647	2.90962	1.20173	4.81963	2.48526	3.86329	1.87822	0.430191	0.308117	1.22551	0.808649	1.91969	0.852463	2.05969	3.28524	2.16606	1.95726	2.42137	2.24741	-3.85407	-2.00931	-2.09933	-2.01366	-0.250316	-1.91846	-2.20709	1.35681	3.16789	2.35158	1.92561	0.339555	0.349338	0.395396	0.494358	1.014	1.5479	1.74389	1.26674
	1.91969	0.852463	2.05969	3.28524	2.16606	1.95726	2.42137	2.24741	-3.85407	-2.00931	-2.09933	-2.01366	-0.250316	-1.91846	-2.20709	1.35681	3.16789	2.35158	1.92561	0.339555	0.349338	0.395396	0.494358	1.014	1.5479	1.74389	1.26674	2.89481	2.9718	2.74859	2.89046	3.62084	2.20398	0.667733	2.81203	1.65577	2.43473	1.6496	1.7247	2.05299	1.35919	1.87996	2.26297	2.64978	1.35793	1.95887	2.36292	3.57866	1.95696
	2.95109	2.93033	1.94049	3.12187	3.51468	2.36315	1.92878	2.09347	2.73957	2.76966	2.20617	1.88401	3.05299	3.35457	3.01296	2.70023	2.07831	1.87739	1.85168	-2.09661	-2.04083	-1.95212	-2.99271	-1.50092	-2.40519	-1.86888	-2.93761	-1.88318	-0.732119	-0.647342	-0.634403	-0.51564	-0.172091	-0.645411	-3.02463	-2.71565	3.53262	3.37047	1.3225	1.6813	4.17152	1.82802	5.57549	1.67431	2.82066	3.87714	2.65086	1.64394	2.87248
	2.20617	1.88401	3.05299	3.35457	3.01296	2.70023	2.07831	1.87739	1.85168	-2.09661	-2.04083	-1.95212	-2.99271	-1.50092	-2.40519	-1.86888	-2.93761	-1.88318	-0.732119	-0.647342	-0.634403	-0.51564	-0.172091	-0.645411	-3.02463	-2.71565	3.53262	3.37047	1.3225	1.6813	4.17152	1.82802	5.57549	1.67431	2.82066	3.87714	2.65086	1.64394	2.87248	3.82645	2.82824	2.18897	2.50961	3.15547	2.62469	1.49615	4.51631	3.22516	1.80857
	2.62469	1.49615	4.51631	3.22516	1.80857	2.19004	2.93573	1.84588	3.07219	1.96236	4.09075	-1.55589	-0.432375	-0.698204	-0.429466	-2.83443	-2.75789	-2.70532	-1.40842	-0.657866	-0.708881	-0.673396	-0.320244	-1.38865	-1.21985	-1.46701	-1.25262	2.89803	1.89225	2.62001	2.88153	1.47315	1.51778	2.11336	3.21856	2.76964	3.46232	1.78198	2.22481	3.32873	3.38438	-1.57154	-2.95074	-2.07517	-3.40435	-1.21244	-0.662596	-0.280569	-0.702912
	1.53324	-1.3237	-1.24465	-0.949291	-1.2575	-0.499399	-0.679226	-0.765637	-2.13151	-2.74152	-0.640507	-0.131447	-0.548342	-0.311197	-1.51602	-4.27098	-2.39535	-1.87876	-1.29629	-0.77794	-0.469747	-0.276821	-1.13284	-0.595318	-0.34454	-0.294316	-0.630783	-0.433679	-1.28503	-1.87436	-3.35148	-2.09709	-3.44234	2.9049	3.46504	2.2029	2.44081	3.04039	2.71037	3.09628	1.15561	0.164395	0.15978	1.50396	1.41637	1.8777	2.34348	1.66044	1.34405
	-2.13151	-2.74152	-0.640507	-0.131447	-0.548342	-0.311197	-1.51602	-4.27098	-2.39535	-1.87876	-1.29629	-0.77794	-0.469747	-0.276821	-1.13284	-0.595318	-0.34454	-0.294316	-0.630783	-0.433679	-1.28503	-1.87436	-3.35148	-2.09709	-3.44234	2.9049	3.46504	2.2029	2.44081	3.04039	2.71037	3.09628	1.15561	0.164395	0.15978	1.50396	1.41637	1.8777	2.34348	1.66044	1.34405	2.75973	2.06552	1.47991	1.37454	3.19641	4.05329	1.74726	2.27016
	-2.08106	-1.18491	-3.26139	-1.1046	-0.185194	-0.820773	-2.856	-1.05551	-1.52775	-2.35619	-0.33807	-0.838318	-0.380119	-0.389717	-0.0909337	-0.0741228	-1.86486	-2.20974	-2.55959	-3.37031	2.85746	3.16031	2.15312	2.8082	1.05328	4.30039	1.59048	2.3584	2.38144	2.54307	2.91858	1.93205	0.836764	2.28382	1.44851	1.9879	2.60922	1.16306	2.36576	3.10746	2.40749	2.04957	2.1304	1.1578	1.16252	1.58934	2.85364	2.16148	2.31858
	1.16252	1.58934	2.85364	2.16148	2.31858	0.628529	2.39596	1.85554	3.18787	2.19866	2.40613	0.868612	1.44162	1.99303	5.47761	1.47195	-0.974216	-1.66886	-1.87159	-1.57264	-1.52595	-2.28996	-1.90844	-2.69695	-2.79886	-2.47072	-1.48518	-2.30039	-0.68499	-0.586746	-0.454655	-0.649908	-0.455769	-1.68543	-1.9777	-1.73835	3.27837	2.82332	2.60501	2.63797	2.76797	2.43305	2.2069	3.71466	2.25863	2.2655	1.75837	3.58964	2.12993
	3.28529	1.92543	2.48728	3.05615	1.68884	0.986752	4.13749	2.73312	2.46038	1.74809	2.06869	2.41496	0.466938	1.96353	2.07781	-5.83787	-2.39579	-2.0157	-1.25667	-2.53176	-2.58592	-1.15608	-2.66971	-2.21039	-0.862366	-1.97724	-0.583154	-1.2533	-0.492343	-1.20293	-0.745389	-2.27584	-2.91002	-1.09804	-4.61697	1.64196	4.39579	0.95591	2.51952	3.37733	3.22209	3.08456	1.97208	2.35457	2.67868	2.37071	2.628	2.44769	2.13574
	1.96478	1.43809	2.50578	0.348369	1.57982	-1.28209	-0.341228	-2.32068	-1.30269	-0.617866	-1.38893	-1.24726	-0.608991	-0.272017	-1.1771	1.54381	1.21336	1.88366	0.105264	1.51193	1.67932	2.73066	1.38676	0.693399	1.17725	1.58721	2.21057	1.50643	2.3703	0.667471	2.14639	1.06667	1.31069	1.70274	0.661231	1.37664	1.03385	0.491366	0.808375	0.811879	0.843001	-0.340139	-1.3101	-1.1524	-2.0442	-0.382336	-0.922347	-0.814954	-1.47446
	2.73066	1.38676	0.693399	1.17725	1.58721	2.21057	1.50643	2.3703	0.667471	2.14639	1.06667	1.31069	1.70274	0.661231	1.37664	1.03385	0.491366	0.808375	0.811879	0.843001	-0.340139	-1.3101	-1.1524	-2.0442	-0.382336	-0.922347	-0.814954	-1.47446	-2.2648	1.56142	1.4282	1.29905	0.318783	0.263079	1.79988	0.922373	1.3478	0.554107	0.370728	0.667558	0.247754	-1.58765	-0.966426	-2.26188	-1.05794	-0.239314	-0.685691	-1.96567	-1.59064
	0.491366	0.808375	0.811879	0.843001	-0.340139	-1.3101	-1.1524	-2.0442	-0.382336	-0.922347	-0.814954	-1.47446	-2.2648	1.56142	1.4282	1.29905	0.318783	0.263079	1.79988	0.922373	1.3478	0.554107	0.370728	0.667558	0.247754	-1.58765	-0.966426	-2.26188	-1.05794	-0.239314	-0.685691	-1.96567	-1.59064	2.67757	0.319498	1.61951	0.85003	2.487	2.42961	1.23988	1.97837	1.07565	1.78602	1.83555	1.20968	1.32388	2.14482	1.8574	1.90487
	-1.34423	-1.32649	-2.86846	-2.35348	-1.84703	-1.27999	-1.35843	-0.908411	-3.25896	-1.34609	-1.5747	-2.34917	-0.840487	-0.694641	-1.71503	-1.99013	-1.24249	-1.5865	-1.27601	-2.30838	-1.29546	-1.1083	-1.0056	-0.635171	-0.40166	-0.646006	-0.0488134	-0.756188	-0.49984	-1.804	-0.387762	-1.10942	2.2568	0.962463	0.742125	1.40767	0.418802	0.705752	1.41172	0.809625	0.84481	1.55183	1.08668	0.688654	1.61396	2.31889	1.09278	3.54567	1.2445
	-1.98115	-1.6347	-1.6484	-1.55367	-1.56011	-0.334759	-1.52241	-1.66355	-1.23437	-1.40392	-1.18107	-1.08574	-0.347496	-0.281844	-1.27191	-0.87691	-1.32681	-1.75284	-1.87453	-2.03279	-1.2083	-1.55571	-0.998749	-0.806415	-1.01343	-1.44885	-0.969883	-0.0497467	-0.764847	-0.103029	-0.610175	-0.140052	-1.70315	-1.12442	-1.71103	1.40393	1.41566	2.8518	1.10745	1.2743	1.92569	1.21395	1.18375	1.26694	0.480965	0.0162906	0.980192	-0.796221	-1.33316
	1.33603	-1.37619	-2.10165	-1.08717	-1.31569	-1.65157	-0.0485668	-0.310088	-0.424992	-0.694117	-0.574305	-2.35891	-2.77296	-1.39329	-2.33215	-2.08275	-2.08396	-0.365274	-0.696602	-0.0706735	-0.53798	-0.60921	-0.557856	-0.870929	-2.77673	-0.964812	-2.00507	2.42523	0.150316	2.1486	1.4439	2.60845	1.93026	1.9303	1.92338	0.374813	1.21524	1.34714	2.9083	2.22224	2.24399	2.02108	2.19441	0.692642	2.20884	1.25937	1.71207	3.06671	2.11513
	-1.02525	-0.505693	-2.67089	-4.45336	-2.19512	-1.56324	-2.47228	-1.36073	-2.6137	-0.386102	-1.00632	-0.377411	-1.2155	-0.717245	-1.48886	-1.35923	-2.11074	1.22356	2.23154	2.45708	2.3384	3.51829	1.17235	1.36035	1.6111	3.32487	2.99216	2.08687	2.85069	1.53813	3.00992	1.38305	2.05265	2.85491	2.05976	2.04509	1.08717	0.232125	2.54871	0.911793	0.62782	0.397022	0.580793	0.480438	-0.567933	-1.19605	-0.340197	-0.755886	-0.564074
[truncated: 112 more columns]

## Sheet: Fig 6-S1CD
Time to forward run offset(s)	-30	-29.5	-29	-28.5	-28	-27.5	-27	-26.5	-26	-25.5	-25	-24.5	-24	-23.5	-23	-22.5	-22	-21.5	-21	-20.5	-20	-19.5	-19	-18.5	-18	-17.5	-17	-16.5	-16	-15.5	-15	-14.5	-14	-13.5	-13	-12.5	-12	-11.5	-11	-10.5	-10	-9.5	-9	-8.5	-8	-7.5	-7	-6.5	-6
change in temperature (degree/s)	-0.00104904	-0.000795047	-0.000141144	-0.00115435	-0.000518799	-0.000103203	-0.000614166	-0.000358582	-0.000756824	-0.00159836	-0.00118493	0.000144958	-0.000397524	0.000759125	0.00118875	0.000228882	0.00141044	-0.00157547	-0.00197615	-0.000934601	0.00141044	0.00134659	0.000167847	8.79139e-05	0.000205994	8.40915e-05	-0.00105286	-0.0020182	-0.0026474	-0.000386057	0.00075531	-0.000531306	-0.000514984	0.000768291	0.000682831	0.000728607	0.000378412	0.000793457	0.00097852	0.00143433	0.0017277	0.00403595	0.00389879	0.000789642	0.00139898	0.00320053	0.00385292	0.00299835	0.00569534
	0.0017277	0.00403595	0.00389879	0.000789642	0.00139898	0.00320053	0.00385292	0.00299835	0.00569534	0.00238514	0.00326538	0.00552328	0.00301743	0.00292791	0.00106812	0.00298143	0.0041008	0.00137987	0.00472641	0.00142573	0.00721741	0.00249863	0.00096323	0.00173569	-0.000825626	-0.00662613	-0.00156716	-0.00373459	-0.00365416	-0.00063324	-0.000164361	0.000358582	-7.64468e-06	-0.00012207	-9.55585e-05	-0.000263214	-0.00223923	-0.00132635	-0.00186157	-0.00167419	-0.000473022	-0.00159009	-0.00139236	-0.000336366	0.000427246	0.000317254	0.00141525	0.00146396	0.00101852
	-0.000454859	0.000896454	0.00130342	0.000183105	-0.00168991	-0.00152894	-0.000774384	-0.000779758	-3.8147e-06	-6.49798e-05	0.000137329	-0.000477793	-0.000247955	-0.00175828	-0.00248718	-0.00240808	-0.00218582	-0.00166321	-0.00335602	-0.00201797	-0.00226665	-0.00305176	-0.00271769	-0.000720978	-3.44011e-05	-0.000545502	-0.0015748	-0.00192642	-0.000382234	-0.000396729	-0.00195312	-0.0070828	-0.00374603	-0.00100145	-0.000816345	-0.00309227	-0.00256348	-0.00207553	-0.00107193	-0.000791225	-0.000461578	-0.00179268	-0.00147247	-0.00136948	-0.00112377	-0.00151443	-0.00180032	-0.000850677	-0.00360829
	-0.00360829	-0.0019722	-0.00240043	-0.00293732	-0.00267564	-0.00331497	-0.0020182	-0.000846863	0.000271386	0.000801086	-0.0012207	-0.00065362	-0.000377655	-0.000573351	-0.000457764	-0.000252275	9.15527e-05	-0.000722423	-0.000366211	0.000160538	0.000286102	0.00137987	0.00193405	0.000953674	0.00149071	0.000312805	-0.00131871	-0.0042305	-0.00373443	-0.00187683	-0.0012996	-0.00150299	-0.001506	-0.00212479	-5.73351e-05	-0.000213623	-0.000602722	-0.00106261	0.000621796	0.000573351	0.000240326	0.000638331	0.000320435	0.000225518	0.00019455	0.00129195	0.00150681	0.00246923	0.00331497
	-0.00106261	0.000621796	0.000573351	0.000240326	0.000638331	0.000320435	0.000225518	0.00019455	0.00129195	0.00150681	0.00246923	0.00331497	0.00423813	0.003421	0.0021019	0.0031993	0.00336456	0.0014716	0.00136566	0.00460974	0.0026474	0.00289734	0.00238037	0.00353184	0.00126266	-0.000175828	0.00567245	0.0030098	0.00100145	-0.00390244	-0.00385674	-0.00443649	-0.00111995	0.00104904	0.000565707	7.62939e-06	0.000122315	-0.000255585	0.000187295	-0.00069809	-0.000762939	-0.000370767	-0.00038147	-0.000619219	-0.000297546	-0.000133782	-0.000213623	-0.000152894	0.000263214
	0.00104904	0.000565707	7.62939e-06	0.000122315	-0.000255585	0.000187295	-0.00069809	-0.000762939	-0.000370767	-0.00038147	-0.000619219	-0.000297546	-0.000133782	-0.000213623	-0.000152894	0.000263214	0.000714778	0.000965118	0.000657443	0.000255585	0.000801086	0.000955586	0.000686646	0.002087	0.00146103	0.00220931	0.00165558	0.00216345	0.00347519	0.00197233	0.00131989	-0.00193028	-0.00238037	-0.00229263	-0.000638331	3.8147e-05	0.000160538	0.000263214	0.000236985	-0.000175476	8.02692e-05	0.000751495	0.000236985	-0.000465393	-0.0020182	-0.00158691	-0.00311139	-0.00188828	-0.00146103
	3.8147e-05	0.000160538	0.000263214	0.000236985	-0.000175476	8.02692e-05	0.000751495	0.000236985	-0.000465393	-0.0020182	-0.00158691	-0.00311139	-0.00188828	-0.00146103	-0.00189588	-0.00342941	-0.00359682	-0.00204468	-0.00254568	-0.00351334	-0.00175445	-0.000804901	0.000267564	-0.000469208	-0.00060393	0.000164032	-0.000160217	-0.000592463	-0.00149536	-0.000665087	2.28882e-05	0.0018309	0.00111008	0.00171241	0.000679016	-5.73351e-05	-0.00043869	0.000535128	0.00030899	8.01086e-05	-0.000863849	-4.95911e-05	0.000439569	0.000591278	0.000561884	0.000328064	0.000531306	6.86646e-05	0.00334837
	-0.00359682	-0.00204468	-0.00254568	-0.00351334	-0.00175445	-0.000804901	0.000267564	-0.000469208	-0.00060393	0.000164032	-0.000160217	-0.000592463	-0.00149536	-0.000665087	2.28882e-05	0.0018309	0.00111008	0.00171241	0.000679016	-5.73351e-05	-0.00043869	0.000535128	0.00030899	8.01086e-05	-0.000863849	-4.95911e-05	0.000439569	0.000591278	0.000561884	0.000328064	0.000531306	6.86646e-05	0.00334837	0.00342178	0.00248834	0.0015831	0.000298143	0.00268555	0.00360489	0.00417018	0.00256729	0.00215198	0.00328827	0.00350891	0.00297546	0.00138369	0.000392914	-0.0011467	-0.00304031
	0.000701904	0.00102439	0.00139999	0.000951763	0.00227356	0.0013504	0.00123079	0.00350952	0.00223989	0.000305176	0.000462503	-0.000270844	0.000175828	-0.00320435	-0.00266799	-0.00120163	-0.00100145	-0.00119781	-0.00244141	-0.00318019	0.000106812	-0.000691844	-0.000953674	-0.00195704	0.000286102	0.000454859	0.00100708	0.000737712	0.000988007	-0.000236985	-0.00012207	-0.000164361	-0.000724792	-0.000965118	-0.00175063	-0.00152588	-0.0016245	-0.0021286	-0.00144102	-0.00181961	-0.00120022	-0.00292206	-0.00486966	-0.00553131	-0.00246159	-0.00123215	-0.00162888	-0.00298143	-0.00331879
	0.0031649	0.00415802	0.00297378	0.00356293	0.00222078	0.00342941	0.00442627	0.0050354	0.00233545	0.00346375	0.00643158	0.00382616	0.000576019	0.00378412	0.00585556	0.00254568	0.00371552	0.00513341	0.00593185	0.00333308	0.0019722	0.00349362	0.00469589	0.00183868	0.00264124	0.00178146	0.00400964	0.00424957	0.00199144	0.00275803	0.00569911	0.001091	0.00188824	0.00555038	0.0035586	0.00389481	0.00292587	0.00249599	0.00223541	0.00495376	0.0014801	0.00429631	0.00352097	0.0064674	0.00227356	0.000680377	0.000850677	0.00149454	0.00131989
[truncated: 834 more rows]
[truncated: 32 more columns]

## Sheet: Fig 6-S1A
WT			RIM ablated
[truncated: 133,980 more rows]

## Sheet: Fig 6-S1B
WT			RIM ablated
Run direction (radian)	Run duration (s)		Run direction (radian)	Run duration (s)
2.56494	50.5		1.25011	241.5
[truncated: 3,909 more rows]
